# Supplementary material for: Identifying a novel anticancer agent with microtubule-stabilizing effects through computational cell-based bioactivity prediction models and bioassays
Source: Royal Society of Chemistry journal article supplement (doi:10.1039/c8ob02193g), 2019-01-01
Supplement: c8ob02193g2.xlsx [file c8ob02193g2.xlsx]

## Sheet: training-nci(13664)
mol	NSCID	classification	ALogP	Molecular_Weight
O=C1Nc2c(NC1=O)cccc2	9431	0	0.051	162.145
[NH+](CCn1c2nc(C#N)c(nc2c(-c2nc3c(n2C)cccc3)c1N)C#N)(CC)CC	730034	1	1.57	414.486
S(=O)(=O)([O-])c1cc2c3c(cccc3c1N)C(=O)N(C2=O)c1ccc(cc1)C	322919	0	0.174	381.382
O(C)c1ccc(N2C(=O)[C@@H]3[C@H](c4[nH]c5c(c4[C@H](CCCC)[C@@H]3CCC)cccc5)C2=O)cc1	663667	1	6.415	444.565
O1[C@H](COC(=O)C)[C@H](OC(=O)C)[C@@H](OC(=O)C)[C@H]1N1C=CC(=NC1=O)N[C@@H]1[C@]2([C@@H]3[N@H+](CC=C2)CC[C@@]23C(Nc3c2cccc3)=C1C(OC)=O)CC	650470	1	-0.416	704.746
O1[C@@H]2[C@H]1C[C@@H](C)[C@H](C2)C(OC[C@H]1C[C@@H]2O[C@@H]2C[C@H]1C)=O	7587	0	1.965	280.359
Clc1ccccc1NC1(CCCC1)C(=O)N	52319	0	2.628	238.713
O1[C@](NC(=O)[C@H]2C=C3[C@H]([N@@H+](C2)C)Cc2c4c3cccc4[nH]c2)(C)C(=O)N2[C@H](Cc3ccccc3)C(=O)N3[C@H](CCC3)[C@@]12O	95090	0	1.456	582.669
n1(-c2ccccc2-n2c(ccc2C)C)c(ccc1C)C	746996	0	4.164	264.365
O=C1CCCc2c1cc1C[C@]3(Cc4c(C3)cc3c(CCCC3)c4C(=O)C)Cc1c2	670428	1	6.266	384.51
O1CC(=CC1=O)[C@H]1[C@]2(CC[C@@H]3[C@H](CC[C@H]4C[C@H](O[C@@H]5O[C@H](C)[C@@H](O[C@@H]6O[C@H](C)[C@@H](O[C@@H]7O[C@H](C)[C@@H](O[C@H]8O[C@@H](CO)[C@H](O)[C@@H](O)[C@@H]8O)[C@H](OC(=O)C)C7)[C@H](O)C6)[C@H](O)C5)CC[C@]34C)[C@]2(O)C[C@@H]1O)C	7535	1	0.44	985.116
O(C(=O)C(Cc1cc2c(cc1)cccc2)(Cc1cc2c(cc1)cccc2)C(=O)C)CC	622304	1	5.953	410.504
[Pt+2]1(Cl)(Cl)NC[Si](CN1)(CC)CC	645351	1	2.967	410.274
Clc1cc(ccc1)C(Oc1ccc(cc1)C)=O	11157	0	4.412	246.689
O=C(N(C(=O)c1cccnc1)Cc1ccccc1)c1cccnc1	73729	0	1.974	317.341
P1(CCc2[nH]c3c(c2C1)cccc3)c1ccccc1	158244	0	4.51	265.289
Clc1cc(N2C([NH+]=C([NH+]=C2N)N)(C)C)ccc1CCC(=O)Nc1ccc(S(F)(=O)=O)cc1	123461	1	1.668	482.959
ClCCNC(=O)Nc1nc[nH]n1	123291	0	-0.108	189.603
OC1C(CCCC1(CO)CO)(CO)CO	6836	0	-1.677	220.263
S(=O)(CC[NH3+])[C@H]1CC(O[C@H](CCC\C=C\[C@H]2[C@@H](C[C@@H](O)C2)[C@@H]1O)C)=O	692306	1	-0.584	374.515
Clc1cc(NC(=O)C=2[C@H](NC(=S)NC=2C)c2cc(Oc3ccccc3)ccc2)ccc1Cl	729778	1	6.171	484.398
n1c2c(cccc2)c(cc1)C	3412	0	2.502	143.185
Oc1ccc(cc1)-c1nc2c(cc1)cccc2C(=O)NCC[NH+](C)C	617930	1	1.507	336.408
S1\C(=C\c2ccccc2)\C(=O)N=C1Nc1sc(C)c(n1)-c1nc(sc1C)NC=1S\C(=C\c2ccccc2)\C(=O)N=1	730522	1	6.389	600.757
c1c(C(C)C)c(cc(C(C)C)c1C)C	84199	0	5.19	190.324
S(C)C1=CC=C2c3c(cc(OC)c(OC)c3OC)CC[C@@H](NC(=O)c3cc([N+](=O)[O-])ccc3)C2=CC1=O	642314	1	4.16	522.57
s1cc(nc1-c1c2c(n(c1)C)C(=O)C=C(N)C2=O)C	693179	1	0.815	273.31
O(C)c1cc([N+](=O)[O-])c2nc(ccc2c1[N+](=O)[O-])C	101647	0	2.071	263.206
O(CCCn1c2c(nc1-c1ncccc1)cccc2)c1cc2N=C[C@H]3N(CCC3)C(=O)c2cc1OC	744017	1	3.953	481.546
S(CCCCCCC)CCO	404006	0	2.953	176.319
O=[N+]([O-])c1cc([N+](=O)[O-])ccc1N\N=C(/Cc1ccccc1)\C	20728	0	3.243	314.296
S=P(Nc1ccccc1)(Nc1ccccc1)c1ccccc1	6371	0	4.202	324.38
Oc1c(cc(cc1Cc1cc(cc(C(C)(C)C)c1O)C)C)Cc1cc(cc(C(C)(C)C)c1O)C	62914	1	9.312	460.647
Brc1cc2[s+]snc2cc1	621198	1	3.504	233.129
s1c2c(nc1-c1ccc(NC(=O)CCCCOc3cc4N=C[C@H]5N(CCC5)C(=O)c4cc3OC)cc1)cccc2	742412	1	4.989	554.659
O1c2c(C(=O)C=C1c1ccccc1)c(O)cc(OCCC[NH+](CC)CC)c2	737144	1	2.216	368.446
O1[C@H](C)[C@H](OC1(Cc1ccccc1)C)C	7041	0	2.277	206.281
O(C)C1=C2C[C@H](C[C@@H](OC)[C@@H](O)[C@H](\C=C(\C)/[C@H](OC(=O)NC)[C@@H](OC)/C=C\C=C(/C)\C(=O)N(C(=CC1=O)C2=O)C)C)C	330512	1	2.772	588.689
O(C)c1c(OC)cc(cc1OC)[C@H](N1[C@H](CCC1=O)C(OC)=O)c1ccc(OC)cc1	673622	1	2.807	429.463
O1c2c3c([C@H]4[C@H](N(C)C3=O)c3c(C[C@H]4O)cc4OCOc4c3)ccc2OC1	108018	1	1.669	367.352
N(=C\1/C=C\C(\c2c/1cccc2)=C(/C#N)\C#N)/c1ccc(N(C)C)cc1	627777	1	4.017	324.379
O=C1c2cc([N+](=O)[O-])ccc2-c2c1cccc2C(=O)[O-]	116739	0	0.972	268.201
O=C(CC[NH+]1CCCC1)c1ccccc1	73484	0	0.724	204.288
Cl[C@H]1c2c3c(cccc3ccc2)[C@H]1Cl	15893	0	3.814	223.098
S1(=O)(=O)c2c(cccc2)C(O)(c2c1cccc2)c1ccccc1	55806	0	3.549	322.378
s1c(ccc1[C@@H]1NC(=S)NC(N)=C1C#N)-c1ccc(cc1)-c1oc2c(n1)cccc2	730317	1	4.75	429.517
O=C1NC(CC(OC)=O)=C(N1)C(OC)=O	34777	0	-1.204	214.175
s1c2CCCCc2c2c1N=C(NC2=O)Cn1nc(nn1)-c1ccccc1	746346	0	3.19	364.424
Clc1cc(Cl)ccc1\C=C\1/Sc2scc([n+]2C/1=O)-c1cc([N+](=O)[O-])ccc1	657445	1	6.203	436.312
o1nc(\N=C\2/C=C(O)C(=O)c3c/2cccc3)cc1C	673784	1	2.195	254.241
O(C)c1c(OC)cc(cc1OC)\C=C/c1ccc(O)cc1	631360	1	3.525	286.322
[nH]1c2c(nc1-c1ccncc1)cccc2	62609	0	2.12	195.22
O=C/1/C(/CN(C\C\1=C/c1ccccc1)C(=O)CC[N+](C)(C)C)=C\c1ccccc1	638635	1	2.066	389.51
O1c2c3n(cnc3c3n(CC(C)C)c(C)c(c3c2)C(OCC)=O)C(=O)C1=O	731291	1	3.124	369.371
O1[C@H]2[C@]34C=CC(=O)[C@@]3(C)[C@@]4(CC[C@@H]2[C@H](C)C1=O)C	125345	0	1.785	246.302
O=C(NCCC[NH2+]CCNC(=O)c1cc(nc2c1cccc2)-c1ccccc1)c1cc(nc2c1cccc2)-c1ccccc1	674090	1	4.595	580.698
S=C(N1CCN(CC1)c1ccc(cc1)C)c1ccc(OC)cc1	111198	0	4.766	326.456
S(Cc1cc(F)ccc1)c1ncnc2n(cnc12)[C@H]1OCCCC1	52441	0	3.568	344.406
ClC1=C(NC(=O)/C(=N\O)/CC(=O)C[C@@H](C=2C(Oc3c(cccc3)C=2[O-])=O)c2ccccc2)C(=O)c2c(cccc2)C1=O	649567	1	3.034	583.952
O=C(CCCCC(=O)c1ccccc1)c1ccccc1	1159	0	4.102	266.334
Fc1ccc(cc1)C1=CC=2[C@H](OC1=O)Oc1c(cccc1)C=2OCC	745528	0	4.057	338.329
Brc1ccccc1\C=C(/P(OCC)(OCC)=O)\C(OCC)=O	643019	1	2.894	391.194
Brc1sc(Br)c2c1C(=O)C[C@@H]2[NH2+]CCC[NH2+][C@H]1CC(=O)c2c1c(Br)sc2Br	704557	1	1.156	664.067
O=C([O-])c1ccccc1\C=C/c1ccccc1	10208	0	1.971	223.247
Clc1cccc(F)c1C(=O)NC(=O)NCC1CC1	379872	0	2.508	270.687
O(C)c1c2cc(C)c(O)cc2c2c(c1)c(cc(O)c2)C	688275	1	4.118	268.307
O(C)c1cc2c([n+](ccc2C#N)C)cc1	144481	0	2.496	199.229
O(CCOc1ccc([N+](=O)[O-])cc1)c1ccc(N)cc1	120623	0	2.593	274.272
Clc1ccccc1[C@@H](SCC[NH3+])C[N+](=O)[O-]	357114	1	1.347	261.748
S(CCCCCCSC=1NCCN=1)C=1NCCN=1	29211	0	2.681	286.46
S1[C@H](c2c(n(nc2C)C(=O)c2ccccc2O)NC1=N)c1cc(OC)c(OC)c(OC)c1	658000	1	3.786	454.499
Cl\C(=C/c1ccccc1)\C(=O)c1ccccc1	699680	1	4.07	242.7
S(=O)([O-])(=NC(=O)C)c1ccc(-n2nc(cc2-c2cc(OC)ccc2OC)-c2ccccc2)cc1	731806	1	4.579	476.524
Clc1ccc(cc1)C1=NN(C(=O)C)[C@H](C1)c1cn(nc1-c1ccc([N+](=O)[O-])cc1)-c1ccccc1	747869	0	5.484	485.922
O(C(=O)C)C=1C(=O)C=CNC=1C	291920	0	-0.665	167.162
O(C)c1ccc(cc1)-c1cc([n+](c(c1)-c1ccccc1)-c1ccc(cc1)C)-c1ccccc1	617743	1	8.619	428.544
s1cccc1C=1Nc2c(cc3OCOc3c2)C(=O)C=1	649126	1	2.683	271.291
Oc1ccc2c(cccc2)c1C[NH+]1CC2CCC(CC2)C1	95492	0	2.649	282.4
s1cccc1C(=O)N1CCN(C(=O)c2sccc2)C1=S	703468	1	3.302	322.426
Brc1[n+](cccc1)Cc1ccc(cc1)C[n+]1ccccc1Br	44752	0	5.342	420.141
O=C1C=C(Nc2ncccc12)c1c2c(ccc1)cccc2	676180	1	3.258	272.301
O(CCC\[NH+]=C(/NC)\c1ccc(NC(=O)c2ccc(cc2)C(=O)Nc2ccc(cc2)/C(=[NH+]/CCCOC)/NC)cc1)C	61614	0	1.992	574.714
O=C1Nc2c(-c3nc(cc(c3C1)-c1ccccc1)-c1ccccc1)cccc2	673435	1	5.081	362.423
O(C(=O)C1C2CC3CC1CC(C2)C3)c1ccc(cc1OC)\C=C\C(=O)CC(=O)\C=C\c1cc(OC)c(OC(=O)C2C3CC4CC2CC(C3)C4)cc1	742024	0	8.354	692.836
S(C(=S)c1c(nn(c1O)-c1ccccc1)C)CCCCCCCCCCCC	640748	1	8.512	418.659
Clc1cc(ccc1)-c1nc2c(nc1Cc1ccc(Cl)cc1)cccc2	718710	1	6.551	365.255
O1CC[NH+](CC1)C[C@H](O)C[N@H+]1C[C@H](N(C[C@H]1C)C(OCC)=O)C	62369	0	-2.522	331.451
Clc1cc(N2C([NH+]=C([NH+]=C2N)N)(C)C)ccc1OCc1cc(ccc1)C(=O)N(C)C	139105	1	1.751	430.931
S(=O)(=O)([O-])C1=C\C(\C=CC1=O)=C(\c1ccccc1C(=O)[O-])/c1cc(S(=O)(=O)[O-])c(O)cc1	4907	0	-3.97	475.425
S1CC(=O)N(c2ccc(OC)cc2)C1=S	3912	0	2.71	239.314
O=C1CC[C@@]2([C@@H](C1)CCC[C@H]1[C@@H]3CC[C@@H](O)[C@]3(CC[C@@H]12)C)C	118611	0	3.758	304.467
Clc1cc2c(NC(=O)[C@]23Sc2c(N3)cccc2)cc1	746559	0	3.445	288.752
S1Cc2n(c3c(n2)cccc3)[C@@H]1c1cc(cc(c1)C(F)(F)F)C(F)(F)F	634466	1	5.779	388.33
Brc1ccc(N=Nc2cc([C@H](P(O)O)NNC(=O)CC(=O)Nc3ccccc3)c(O)cc2)cc1	659616	1	4.245	546.31
o1c2c(cc1)[C@@H]([C@H]1[C@H](C2)[C@]2(CC[C@H](OC(=O)c3ccccc3)[C@@](C(=O)[O-])(C)[C@]2(O)[C@H](OC(=O)c2ccccc2)[C@@H]1OC)C)C	730813	1	3.572	601.663
[As](SC[C@@H](O)CO)(CCC)CCC	724598	1	2.278	268.248
O(C(=O)c1ccccc1)c1cc(ccc1)C(=O)C	103148	0	3.001	240.254
O1c2c(cc(cc2C)C(C)(C)C)C(=CC1=O)C	19535	0	4.232	230.302
FC(F)(F)c1cc(cc(N=Nc2c(n(nc2C)C(=O)c2c(noc2C)-c2ccccc2)C)c1)C(F)(F)F	328101	0	7.156	521.414
O=C1N(C)C(=O)N=C2N(c3c(N=C12)cccc3)c1ccc(cc1)CCCC	627985	1	4.481	360.409
O=[N+]([O-])c1cc2[n+]([O-])nc([n+]([O-])c2cc1)N	623606	1	-0.671	223.146
Clc1cc(ccc1)\C=C\C(=O)c1ccc(Nc2nc(nc(n2)Nc2ccc(Cl)cc2)Nc2ccc(F)cc2)cc1	743879	0	9.565	571.432
O(C(=O)\C=C/C(OC1CCCCC1)=O)C1CCCCC1	6100	0	4.206	280.359
Brc1cc2cc(C(=O)Nc3ccccc3OC)c(O)cc2cc1	367089	1	4.013	372.213
O1CC[NH+](CC1)C[C@H]1CC\C(=C\c2ccc(OC)cc2)\C1=O	639512	1	0.93	302.388
Clc1cc(OC)c(NC(=O)c2cc3c(cc2O)cccc3)cc1OC	50688	1	3.912	357.788
Clc1cc-2c(cc1N)\C(=N\O)\c1c-2cccc1	106364	0	2.907	244.676
O(CC[NH+]1CCCC1)c1ccc(cc1OC)\C=C\1/C[C@H]2[C@H]3[C@H](CC[C@]2(C)C/1=O)[C@@]1(C(=CC(=O)CC1)CC3)C	727089	1	4.491	518.707
O=C1N(c2ccccc2)C(=O)[C@@H]2[C@H]1[C@@H]1[N@H+](C[C@H]2C=C1C#N)Cc1ccccc1	118818	0	1.036	370.424
O=C([O-])[C@@]1([C@H]2CCc3cc(ccc3[C@]2(CCC1)C)C(C)C)C	730999	1	3.915	299.427
Oc1c(cc(cc1C)C(=O)c1ccccc1)C	342	0	3.964	226.27
Brc1ccc(\N=C\c2cc(cc(OC)c2O)C=O)cc1	718160	1	3.675	334.165
S=C1NC2=C(NC(=O)NC2=O)N1c1ccccc1	23725	0	1.733	260.272
O=C(NCC[NH+](C)C)c1c2nc3c(nc2ccc1)c1c(cc3)cccc1	617976	1	1.754	345.418
S(=O)(=O)(N)c1cc(N2N=C(CC2=O)C)ccc1	15355	0	-0.172	253.278
O=C1N(CC)C(=O)C=C1	7638	0	0.16	125.125
O1[C@@H](C)[C@@H](O)\C=C\C=C\C=C\C=C\C=C(/C)\[C@@H](O)[C@H](O)[C@H](O)C[C@H](O)C[C@H](O)C[C@H](O)C[C@H](O)C[C@H](O)[C@H]([C@H](O)CCCCC)C1=O	277813	1	0.475	670.828
O=C([O-])c1[nH+]ccc(N2CCCC2)c1	111086	0	0.299	192.214
S1(=O)(=O)C\C(=C/c2ccc(OC)cc2)\C(=O)/C(/C1)=C/c1ccc(OC)cc1	144302	1	3.334	384.445
O1[C@H]([C@H]([C@H](O)[C@H](C(=O)CC)C)C)[C@@H](C)C(=O)C(C)=C1CC	740850	0	2.836	296.402
Cl\C(=N/OC(=O)Nc1ccc(cc1)C(OC)=O)\C(C)C	682829	1	2.819	298.722
ClC1=CC(Cl)=CNC1=O	16021	0	0.413	163.989
O1C[C@H]2[C@@H]([C@H](c3c(cc4OCOc4c3)[C@H]2Nc2cc3c(nc2)cccc3)c2cc(OC)c(O)c(OC)c2)C1=O	628666	1	4.069	526.537
Clc1nc(nc(Cl)c1)CC#N	17578	0	1.813	188.014
O1[C@H](C)C(=O)CC[C@H]1O[C@H]1[C@H](O[C@H](O[C@H]2[C@H](O[C@H](O[C@H]3c4c([C@H](C(OC)=O)[C@@](O)(C3)CC)c(O)c3c(C(=O)c5c(cccc5O)C3=O)c4O)C[C@H]2[NH+](C)C)C)C[C@H]1O)C	670121	1	0.879	828.875
[Bi+3]12(Br)(S[C@@-](S1)N1CCCCC1)S[C@@-](S2)N1CCCCC1	625503	1	3.631	613.477
Clc1cccc(Cl)c1\C=C\C(=O)C(C)C	669739	1	4.486	243.129
Brc1cc2c(ncnc2N\N=C(/[C@H](O)[C@H](O)CO)\C=N\Nc2ncnc3c2cc(Br)cc3)cc1	716031	1	3.517	590.227
O=C1NC(=O)N[C@]12CCc1c2cccc1	32838	0	1.052	202.209
S(C)c1ccc(O)cc1C	87560	0	2.615	154.229
Clc1ccccc1\C=N\NC(=O)c1ccc(nc1Nc1ccc(Cl)cc1C)C(F)(F)F	747198	1	6.807	467.271
O(CCOC(=O)N1CC[NH+](CC1)C)CCOC(=O)N1CC[NH+](CC1)C	44940	0	-3.074	360.449
Oc1c(cc(cc1Cc1cc(ccc1O)C(C)C)C(C)C)Cc1cc(ccc1O)C(C)C	634602	1	8.635	432.594
S(=O)(=O)([O-])c1c2c(ccc1N)cccc2	5523	0	-0.921	222.24
s1c(C(=O)NN)c(nc1NC(=S)Nc1ccc(F)cc1)C	745920	0	2.653	325.385
[As](S[C@H]1O[C@H](CO)[C@H](O)[C@H](O)[C@@H]1NC(=O)C)(C)C	290806	1	-0.903	341.256
O(CC)c1cc(N)ccc1	9817	0	1.415	137.179
BrC\C=C\C[C@]1(Cc2c(cccc2)C1=O)C(OCC)=O	697875	1	3.675	337.208
Brc1c(F)c(F)c(F)c(F)c1F	21630	0	3.605	246.96
FC(F)(F)c1cc2nc(n(c2cc1)C[C@H]1[C@@H]2[N@@H+](CCC1)CCCC2)Cc1ccc(OC)cc1	706173	1	4.516	458.539
O1[C@H]([C@H](O)[C@H](O)[C@H]1CO)c1n[nH]c2c1ncnc2N	102811	1	-1.643	267.241
Clc1nc(N(CC)c2ccccc2)c2c(n1)n(nc2)C	11643	0	3.599	287.747
O1C[C@]1([C@H](OC(=O)c1cc(OC)cc2c1cccc2C)C(=O)NCCCCNC(=O)[C@@H](OC(=O)c1cc(OC)cc2c1cccc2C)[C@]1(OC1)C)C	732224	1	4.821	712.785
ClC1=C(Nc2ccc(OCCCCC)cc2)C(=O)c2c(C1=O)c(O)ccc2O	662373	1	4.5	401.84
O1[C@H]2[C@@]34CC[N@H+]([C@@H](Cc5c3c1c(Oc1nnnn1-c1ccccc1)cc5)[C@@]4(O)Cc1c3c([nH]c12)cccc3)C	708568	1	2.699	519.574
O(C(=O)[C@H]1N(CCC1)C(=O)C1(NC(=O)C)CCCC1)CC	71694	0	0.763	296.362
Oc1cc2c(-n3nnc4c3c(C2=O)c(NCC[NH2+]CCO)cc4)cc1	645815	1	0.191	340.357
Fc1ccc(cc1)\C=C\1/CCOc2c(cc([N+](=O)[O-])cc2)C/1=O	734468	1	3.82	313.28
O=C1c2c(CCC[C@@H]1C[NH+](C)C)cccc2	661440	1	1.296	218.315
O1C=2N=CN(N)C(=N)C=2[C@@H](c2c1n(nc2-c1ccccc1)-c1ccccc1)c1cc(OC)c(OC)cc1	691419	1	4.632	492.529
[Se]([Se]C[C@H](NC(=O)c1ccccc1)C(=O)[O-])C[C@H](NC(=O)c1ccccc1)C(=O)[O-]	742182	0	-0.331	540.287
Oc1c2ncccc2ccc1C[NH+]1CCCCC1	57969	1	1.204	243.324
O=C(N)N1N=C(C[C@@H]2[N@H+]([C@@H]3N(N=C(C[C@H]3[C@@H]12)c1ccccc1)C(=O)N)C)c1ccccc1	749512	0	0.388	432.498
[Mo]12(Cl)(Cl)(O[C-](c3ccc(Cl)cc3)[CH-][C@@-](O1)C)O[C-](c1ccc(Cl)cc1)[CH-][C@@-](O2)C	634050	1	7.601	558.091
O=C([O-])c1cc2c(cc1Nc1ccccc1)cccc2	40275	0	2.444	262.283
S\1CC(=O)N(C)/C/1=N/NC(=O)[C@@H](NC(=O)c1ccccc1)CCSC	741267	0	1.216	380.485
O(C)c1cc2c3c([nH]c2cc1)c(c1c(c[n+](cc1)COC(=O)CCCC)c3C)C	637126	1	6.193	391.483
[U+8]12(O[C-](c3ccccc3)[CH-][C-](O1)c1ccccc1)(O[C-](c1ccccc1)[CH-][C-](O2)c1ccccc1)(O)[O-]	634045	1	6.516	720.553
O=C1N(c2n(nnc2-c2ccccc2)-c2n(c3c(c12)cccc3)C)CCCC(=O)NCC(OCC)=O	734977	1	3.13	486.522
O1[C@H]2[C@@H]3O[C@@H](O[C@@H]([C@H]3O[C@H]2OC1(C)C)C[NH2+]CCO)c1ccccc1	33689	0	-0.988	352.402
O(C)c1cc(cc(OC)c1O)C(OCCC(C)C)=O	16712	0	2.991	268.306
S1CCN2C[C@@H](N=C12)c1ccccc1	177023	0	2.29	204.291
S=C(N1CCN(CC1)c1ncccc1)[N-]\N=C(/C)\c1nc(ccc1)C	335787	1	3.818	353.465
Clc1ccc(Nc2nc(nc(n2)Nc2ccc(Cl)cc2)Nc2ccc(cc2)-c2noc(c2)-c2ccc(N(C)C)cc2)cc1	743877	1	9.86	609.508
O1c2c(C(=O)c3c1c1[C@H]4[C@H](OC=C4)Oc1cc3OC)c(O)ccc2OC	178249	1	2.395	354.31
O1CCN(CC1)C(=O)CCCCCCCC	3150	0	2.671	227.343
O1c2c(C=C([N+](=O)[O-])[C@H]1c1ccc(OC)cc1)cccc2OC	667223	1	3.356	313.305
ClS(=O)(=O)c1c(cc(cc1C(C)C)C(C)C)C(C)C	102803	0	5.321	302.86
S=C1NC(C=C(N1c1ccc(N(C)C)cc1)C)(C)C	49833	0	3.878	275.412
O=C([O-])C(CCc1c2c(ccc1)cccc2)(C(=O)[O-])C	27919	0	0.39	270.28
O(C)c1cc(ccc1OC)\C=C\C(=O)c1cc(C(C)(C)C)c(O)c(c1)C(C)(C)C	709100	1	6.227	396.519
O=[N+]([O-])c1cc2CCCc2cc1	76672	0	2.781	163.173
Clc1nc2c(ncnc2N)n1[C@H]1O[C@@H]2[C@H](OP(OC2)(=O)[O-])[C@H]1O	614491	1	-2.153	362.643
Brc1cc(ccc1)\C=N\N=C\1/NC2=C(N/1)N(C)C(=O)N(C)C2=O	64667	0	1.303	377.196
Oc1c2c(ccc1)C(c1c(C2=O)c(O)ccc1)C(=O)CCC(OCC)=O	633383	1	2.599	354.353
[NH+]1(CC[NH+](CC1)Cc1ccccc1)Cc1ccccc1	8566	0	0.323	268.397
OCC[N+](CCO)(C[C@@H](O)CCCCCCCCCCCCCC)C	678146	1	3.722	360.595
O=C(N\N=C\c1ccc([N+](=O)[O-])cc1)C1CC1	72884	0	1.671	233.223
N(C)(C)c1cc(ccc1)\C=C(/C#N)\c1ccccc1	667251	1	3.817	248.322
Clc1nc2c3c(c1)[C@@](O)(CC(=O)c1ccccc1)C(=O)Nc3cc(OC)c2OC	706234	1	2.661	412.823
O=C1NNC(=[NH2+])C2(CCCC2)[C@@H]1C#N	743255	0	-0.181	193.226
O(C(=O)C)[C@@H]1C[C@@H](CC[C@@H]1C(C)C)C	7350	0	3.158	198.302
[Sn](OC(=O)c1ncccc1)(OC(=O)c1ncccc1)(c1ccccc1)c1ccccc1	353500	1	5.015	517.121
[Sn+4]12(SC(=N[N@H+]1[C-](C)c1sccc1)N)(SC(=N[N@H+]2[C-](C)c1sccc1)N)([CH-]CCC)[CH-]CCC	630455	1	6.466	629.516
N#CC1CCCCC1	17557	0	2.17	109.169
Clc1cc(Nc2nc(ccc2C(=O)N\N=C\c2cc(OC)c(OC)c(OC)c2)C(F)(F)F)c(OC)cc1	745484	1	5.591	538.904
P(OCC)(OCC)(=O)NCc1occc1	100742	0	0.65	233.201
o1c2[nH+]c3c(cccc3)c(Nc3ccc(cc3)C(=O)C)c2cc1	720555	1	3.9	303.335
O1[C@H](O[C@@H](CC1(C)C)C)Cc1ccc(OC)cc1	6269	0	2.589	250.333
O1[C@@H](C)[C@H](\N=C\2/C=C3NC(=O)/C(=C/C(=O)[C@H]4[C@H](C4)[C@@H](O)[C@@H](C)[C@@H](O)[C@@H](C)[C@@H](OC(=O)C)[C@@H](C)[C@@H](OC)\C=C\O[C@]4(Oc5c(c/2c(c(O)c5C)C3=O)C4=O)C)/C)CC[C@H]1O	177383	1	2.255	822.894
S(CC(=O)Nc1ccc(S(=O)(=O)N(CC)CC)cc1)c1oc2c(n1)cccc2	744187	0	2.89	419.518
O=C(Nc1ccc(cc1)C)C	7644	0	1.436	149.19
Clc1cc2OCOc2cc1[C@@H]1O[C@H](CCC)[C@H](CO1)CC	34219	0	4.278	312.789
O=C(N1CCN(c2c1cccc2)C(=O)C)C	70129	0	0.301	218.252
O=C1NNC(N)=C1N=Nc1ccccc1	60261	0	0.57	203.201
O(C(=O)c1c2cc([N+](=O)[O-])ccc2[nH]c1)CC	88960	0	2.222	234.208
FC(F)(F)c1cc(ccc1)C(=O)C#Cc1ccccc1N	718545	1	4.02	289.252
O(C)c1c2c(ccc1)C(=O)c1c(cccc1)C2=O	400205	0	2.792	238.238
Fc1cc2c(nc1N1C[C@H]([NH2+][C@H](C1)C)C)N(C=C(C(=O)[O-])C2=O)C(C)(C)C	742561	0	-0.146	376.425
[Sn]1(OC(=O)C\N=C(\c2c(O1)cccc2)/C)(CCCC)CCCC	630253	1	4.832	424.122
O(C)c1c2[n+]([O-])c3c([n+]([O-])c2ccc1)c(OC)ccc3	742306	1	1.338	272.256
Clc1cc2c(-c3c(cccc3C(=O)[O-])C2=O)cc1	123807	0	1.742	257.649
Clc1cc(ccc1Cl)\C=C\C(=O)c1c2c(ccc1)cccc2	635961	1	5.939	327.204
S=C1NC(=O)\C(=C\c2ccccc2OC)\C(=O)N1	89374	0	1.747	262.284
Clc1cc(Cl)ccc1OCC(OC)=O	9399	0	2.849	235.064
s1c2CCCCc2c2c1N=C(NC2=O)CSc1n2c(nn1)N=C(C=C2C)C	745808	0	3.553	398.505
O=C1[C@@H](O)C[C@@H]2C(=CC[C@@H]3[C@@]2(C)C(=O)C[C@]2(C)[C@@H]([C@@](O)(C(=O)\C=C\C(OC(=O)C)(C)C)C)[C@H](O)C[C@]23C)C1(C)C	49451	1	2.312	558.703
Oc1c(O)c(c2c(cc(C)c(-c3c(cc4c(c(C=O)c(O)c(O)c4C(C)C)c3O)C)c2O)c1C(C)C)C=O	56817	1	6.592	518.554
[P+]1(OCCO)(OCCO)n2c3ccc2C(=C2N=C(C=C2)C(=c2n1c(cc2)=C(C1=NC(C=C1)=C3c1ccccc1)c1ccccc1)c1ccccc1)c1ccccc1	682066	1	7.025	765.813
O1C(=O)\C(=C\C=C\c2oc([N+](=O)[O-])cc2)\C(OC12CCCC2)=O	297098	0	2.703	319.266
O1CC([N+](=O)[O-])(COC1c1ccccc1)CC	7137	0	2.388	237.252
ClC1=CC(=CN2C1=NN1c3c(S(=O)(=O)N=C12)c[nH+]cc3)C(F)(F)F	742173	0	1.752	376.722
Clc1cc(NC(=O)C)ccc1	6116	0	1.614	169.608
O=C1[C@H]2[C@H]([C@@H]3CC[C@@H]([C@@H](O)C)[C@]3(C1)C)CC[C@H]1C[C@@H](O)CC[C@@]12C	82862	0	2.848	334.493
Oc1n[nH]c2nc(cc(c12)C)C	24484	0	1.588	163.177
S1CC(=O)N(NC(=O)c2ccc(nc2)C)[C@H]1c1cc(Oc2ccccc2)ccc1	745076	0	3.188	405.47
Clc1nc(Cl)nc(Cl)c1CCCCC	92497	1	4.965	253.556
O[C@]1([C@H]2C[C@@H](C1)[C@@H](C(=O)[O-])[C@H]2C(=O)[O-])C	122375	0	-3.131	212.199
s1c2c(nc1N)cccc2	4670	0	1.708	150.201
Oc1ccccc1-c1[nH]c2c3c(c4c(c2n1)cccc4)cccc3	332670	1	4.845	310.349
S=C(N1CC[NH+](CC1)C1CCCCCC1)[N-]\N=C(/C)\c1ncccc1	376265	1	3.228	359.532
O(C)c1ccc2c(cccc2)c1[N+](=O)[O-]	17570	0	2.616	203.194
O=C([O-])CCc1cccnc1	89720	0	-0.674	150.155
S(=O)([O-])(=NC(=O)Nc1ccc(cc1)C)CCCC	23094	0	2.439	269.34
S=C(N([O-])Cc1ccccc1)c1ccccc1	646160	1	2.953	242.316
Clc1ccc(SC2Cc3c(C2)cccc3)cc1	76659	0	5.044	260.782
OCCNc1ccccc1CC	71240	0	2.041	165.232
O=C/1NC(=O)N\C\1=C\c1ccc(cc1)\C=C/1\NC(=O)NC\1=O	659436	0	-0.357	298.254
S(c1c2nonc2c([N+](=O)[O-])cc1)c1nc(nc2n(cnc12)[C@@H]1O[C@H](CO)[C@H](O)[C@@H]1O)N	348400	1	0.223	462.397
O(C)c1ccccc1NC(=[NH2+])Nc1ccccc1OC	37143	0	2.441	272.322
ClC1=C(NCc2occc2)C(=O)c2c(cccc2)C1=O	45029	1	2.126	287.698
O(C)C1=NC=2NCC(=O)N(CC=2C(=O)N1C)Cc1ccccc1	748303	0	0.877	314.339
[NH2+](CCCC[NH2+]CCC[NH3+])CCC[NH3+]	69852	1	-5.975	206.372
O(C)c1ccc(cc1)-c1nc2c(c3c1cccc3)cccc2C(=O)NCC[NH+](C)C	678905	1	2.641	400.493
O1c2c(OC1)cc1c(c2)/C(/C2=C1N(C)C(=O)c1cc(OC)c(OC)cc12)=C\[C@@H]([NH3+])CCCC[NH3+]	726764	1	-0.113	465.541
Clc1cc(ccc1)[C@@H](NC(=O)c1ccccc1)[C@H](O)C(O[C@@H]1C[C@@]2(O)[C@@H](OC(=O)c3ccccc3)[C@H]3[C@@](C)([C@@H](O)C[C@H]4OC[C@@]34OC(=O)C)C(=O)[C@H](OC(=O)C)C(C2(C)C)=C1C)=O	662159	1	3.719	888.351
Clc1c(Cl)nc(nc1Cl)C(C)C	66916	1	3.548	225.503
O(C(=O)C)CCC/C(/[N+](=O)[O-])=C\c1cc2c(cc1)cccc2	106859	1	3.365	299.321
o1c2c(nc1N\[NH+]=C(/N)\c1ncccc1)cc([N+](=O)[O-])cc2	705933	1	1.827	299.265
O1[N+]([O-])=C[C@@](Cc2cc(OC)c(OC)cc2)(CC)[C@@H](OC(=O)C(C)(C)C)[C@H]1O[C@H]1CCCC1(c1ccccc1)c1ccccc1	699763	1	5.204	615.756
O(C)c1c(cccc1OC)\C=N\N=C/1\NC=C([N+](=O)[O-])C=C\1	42362	0	1.291	302.285
Cl\C\1=C/C\C=C(\C)/[C@H](OC(=O)C)CC(O[C@@H]2C[C@H](O[C@@H]2[C@H](O)\C=C(\CC(OC)=O)/C)CC/1)=O	731928	1	2.867	484.967
BrC1(Br)CC2([C@H]3C([C@@H]2CCC3)C1=O)C	624358	1	3.077	322.036
O(Cc1ccccc1)c1cc(ccc1)[C@@H]1NC(=O)c2c(N1)cccc2	175635	1	4.015	330.38
O1[C@H]2CCCC[C@H]([C@@H]2C(OC)=O)C1=O	119513	0	1.27	198.216
S=C(N(C)C)[N-]\N=C(/C=N\[N-]C(=S)N(C)C)\c1ccccc1	693327	1	4.707	334.463
Clc1cc(ccc1Cl)\C=C\C(=O)C(C[NH+]1CCCCC1)(C)C	640682	1	3.847	341.295
[Sn](OC(=O)[C@H]1NC(=O)CC1)(OC(=O)[C@@H]1NC(=O)CC1)(CCCC)CCCC	633516	1	2.221	489.151
O=C1N(c2n(nc(c2)C)-c2c(-c3c1cccc3)cccc2)C	749500	0	3.142	289.331
s1c2c(nc1N\N=C(/C)\c1nnccc1)cccc2	693630	1	2.865	269.325
OCCNC=O	30134	0	-1.245	89.0932
[Si](O[C@@H]1[C@@]2(O[C@H]2C(=O)N[O-])[C@H](O[C@H]1N1C=C(C)C(=O)NC1=O)CO[Si](C(C)(C)C)(C)C)(C(C)(C)C)(C)C	706090	1	4.092	556.777
Clc1ccc(OC[C@@H](O)C[NH+]2CCN(CC2)c2cc(ccc2)C)cc1	91356	0	2.66	361.886
N#C\C(=C/c1c2c(c3c(c1)cccc3)cccc2)\c1ccccc1	638632	1	5.472	305.372
Brc1ccc(cc1)\C=C\C(=O)c1cc(C[NH+](C)C)c(O)c(c1)C[NH+](C)C	677792	1	1.234	419.355
Cl\C(=N/OC(=O)Nc1ccc(OC)cc1)\CC	682833	1	2.485	256.686
Clc1cc(Cl)c(F)cc1C=1Sc2n(N=1)c(nn2)-c1cc(F)c(Cl)cc1Cl	741324	0	6.447	452.093
S=C1N([O-])C(=Nc2c1cccc2)c1ccccc1	685462	1	2.702	253.299
S(CC(=O)c1ccccc1)c1n2c(nn1)N(C)C(=O)C(C#N)=C2c1ccccc1	744870	0	3.029	401.441
BrCC(=O)Nc1cc(ccc1)C(OCC)=O	708444	1	1.831	286.122
Brc1c2c(C(=O)CC2)c(OC)cc1	10995	0	2.627	241.081
s1cc(nc1-c1ccccc1)COC(=O)CN1NC(=O)c2c(cccc2)C1=O	745697	0	2.133	393.416
S1[C@@H]2NC3=C4[C@]5(C1=CC(=O)[C@@H]([N+]1=C4c4c([nH]cc4CC1)C3=O)C5)C2	626160	1	0.892	336.388
O=C1NN=Nc2n(ncc12)-c1ccccc1	113988	0	1.977	213.195
O1C[C@@H](O)CC1=O	26907	0	-0.556	102.089
O=C1N=C(NC(C)=C1NC(=O)C)N	85071	0	-1.619	182.18
Clc1cc2nc3c(nc2cc1)c(NCCC[NH+](CC)CC)cc(OC)c3	32930	1	2.854	373.9
O(CC(=O)c1ccc(NC(=O)C)cc1)c1ccc(cc1)\C=C\1/CCc2c(cccc2)C/1=O	744639	0	4.622	425.476
O1CC[NH+](CC1)CCCNc1c2c(C(=O)c3c(cccc3)C2=O)c(NCCC[NH+]2CCOCC2)cc1	678028	1	-0.919	494.626
O=C1N(C)C(=O)N(c2nc([nH]c12)N1CCCCC1)C	14311	0	1.315	263.296
O(C)c1ccc(N2N=Nc3n(c(-c4ccccc4)c(C)c3C#N)C2=O)cc1	701659	1	5.563	357.365
O(C)c1cc(OC)ccc1CNC(=O)[C@H]1N(CCC1)C(=O)[C@H](N(C(=O)[C@@H](N(C(=O)[C@@H](NC(=O)[C@@H]([NH+](Cc1ccccc1)Cc1ccccc1)C(C)C)C(C)C)C)C(C)C)C)C	704972	1	4.456	842.097
ClCCN(CCCl)c1ccc(cc1)CC(O[C@@H]1CC2=CC[C@H]3[C@@H]4CC[C@H]([C@@H](CCCC(C)C)C)[C@]4(CC[C@@H]3[C@]2(CC1)C)C)=O	104469	0	10.946	644.797
O(CCC[NH+](C)C)c1ccc(cc1)\C=C/1\CCC\C(=C\c2ccc(OCCC[NH+](C)C)cc2)\C\1=O	634800	1	2.385	478.666
[Sn](C=C=C)(c1ccccc1)(c1ccccc1)c1ccccc1	152093	1	5.63	389.078
O1C[C@H]2[C@@H]([C@H](c3c(cc4OCOc4c3)[C@H]2Nc2cc(ccc2)C(=O)C)c2cc(OC)c(O)c(OC)c2)C1=O	628669	1	3.622	517.527
OC[C@H](C)c1ccc(cc1)C	5309	0	2.352	150.218
O(CC[NH+](C)C)c1ccc(cc1)\C(=C(\CC)/c1ccccc1)\c1ccccc1	180973	1	4.758	372.522
OC[C@H]1C[C@H](n2c3nc(nc(N)c3nc2)N)C=C1	614850	0	-0.276	246.268
Clc1cc2c(nc1)NC(=CC2=O)c1cc2c(cc1)cccc2	679022	1	3.922	306.746
O=C1CCC[C@H](CC=C)[C@@H]1CC=C	69969	0	3.072	178.271
Clc1ccc(cc1)CSC(N)=N	25254	0	2.671	200.688
O(C)C1=CC(=O)c2c(C1=O)c(O)c1c(C(=O)[C@]3(c4c(CC3)cc3c(C(=O)NC(=C3)\C=C\C=C\C)c4O)C1=O)c2O	601617	1	2.789	539.489
O(C(=O)CCNc1c2c([nH+]c3c1cccc3)cccc2[N+](=O)[O-])C	673805	1	3.286	326.327
O(C)c1cc2c(c3c(cc2)C(=O)/C(/CC3)=C\[O-])cc1	34295	0	2.165	253.273
Clc1cc\2c(N(C[N@H+]3CCN(C[C@@H]3C)c3c(OC)c4N(C=C(C(=O)[O-])C(=O)c4cc3F)C3CC3)C(=O)/C/2=N\c2ccc(S(=O)(=O)Nc3ncccn3)cc2)cc1	731095	1	1.706	801.242
O1[C@H](CO)[C@@H](O)[C@H](O)[C@@H]1n1c2ncnc(N)c2c(C#N)c1N	175630	1	-1.846	306.277
N=C1c2c(-c3c1cccc3)cccc2	12352	0	2.977	179.217
Oc1c2c(ccc1)C(=O)c1c3c(C[C@@H](CC3=O)C)ccc1C2=O	628869	1	3.339	306.312
O(C)c1c(OC)c2-c3cc(C(OC)=O)c(O)cc3[C@@H](NC(=O)C)CCc2cc1OC	700912	1	2.599	415.436
O(C)c1cc2N([C@@H]3[C@@]4([C@H]5[N@@H+](CC=C[C@@]5(CC)[C@H](OC(=O)C)[C@@]3(O)C(OC)=O)CC4)c2cc1[C@@]1(c2[nH]c3c(c2CCC[N@@H+]2C[C@@](O)(C[C@H](C1)C2)CC)cccc3)C(OC)=O)C	651726	1	2.222	827.017
[Hg](OC(=O)c1ccccc1)C[C@H]1OC[C@H](OC1)C[Hg]OC(=O)c1ccccc1	30916	1	2.884	757.549
O1CC([NH3+])(COC1c1ccccc1)CC	72759	0	0.444	208.277
O(C)c1cccc(\C=N/NC(=[NH2+])C(=[NH2+])N\N=C\c2cccc(OC)c2O)c1O	46959	0	1.403	386.405
[NH2+]=C([N-]\N=C\c1ccccc1)[N-]\N=C\c1ccccc1	68154	1	2.818	264.305
F[C@@]12[C@H]([C@@H]3CC[C@H](C(=O)C)[C@]3(C[C@@H]1O)C)CCC1=CC(=O)CC[C@@]12C	17128	0	2.819	348.452
S=C(N(CCc1ncccc1)C)[N-]\N=C\c1ncccc1	670780	1	3.433	298.386
O1c2cc(ccc2OC1)C[NH2+][C@@H](CCCCC[C@H]([NH2+]Cc1cc2OCOc2cc1)CCCC)CCCC	27413	1	5.266	512.724
O1[C@H](CCC1=O)C	33700	0	0.653	100.116
S(Cc1ccccc1)C1=NC(=O)C=CN1Cc1ccccc1	104153	0	3.827	308.397
[NH2+]1CCC[C@@H]1c1ccc(cc1)-c1ccccc1	12251	0	2.145	224.321
O=C1N(C)C(=O)N(c2nc(n(c12)C)CCc1ccccc1)C	40933	0	2.316	298.34
O(C[C@@H]1[C@@H]2CC[C@@H](C2)[C@@H]1COC(=O)C)C(=O)C	556	0	1.358	240.295
[Ru+]1234(Cl)([P+](c5ccccc5)(c5ccccc5)c5ccccc5)c5c1c2c3[c-]45	631479	1	4.67	458.862
S(=O)(=O)(Nc1cc(ccc1)C(=O)NCc1ccccc1F)c1cc2OCCOc2cc1	745717	0	3.1	442.46
S1C[C@H](N(C1)C(=O)[C@@H](O)[C@H](NC(=O)[C@@H](NC(=O)COc1c2c(ccc1)cncc2)CSC)Cc1ccccc1)C(=O)NC(C)(C)C	651714	0	1.776	667.838
ClC1=C\C(=N\c2cc(C)c(O)cc2)\C=C(Cl)C1=O	11221	0	3.506	282.122
Clc1ccc(cc1)C(=O)c1sc(nc1N)Nc1ccc(OC)cc1	710526	1	4.513	359.83
S(CC[NH3+])[C@@]1(O)c2c(-c3c(cccc3)C1=O)cccc2	139049	1	1.341	286.369
Clc1cc2c(NC(=O)C[N+]([O-])=C2c2ccccc2)cc1	169898	0	2.036	286.713
Clc1cc(NS(=O)(=O)c2ccc(N)cc2)cc(Cl)c1N	56600	0	2.153	332.206
S(=O)(=O)(NC1(c2ccccc2)C(=O)N(C)C(=O)N(C)C1=O)c1ccc(NC(=O)C)cc1	115596	0	0.478	444.461
Oc1cc2CC[C@H]3[C@@H]4CC[C@@H]([C@H]([NH2+]CC[NH+](C)C)C)[C@]4(CC[C@@H]3c2cc1)C	109509	1	1.9	372.587
O(C(=O)c1ccccc1NCCO)C	109528	0	0.954	195.215
O1c2c(Cc3c1nc(nc3-c1ccccc1)C)c1c(cc2)cccc1	112559	0	5.106	324.375
O=C1NC(=O)CC1(C)C	15293	0	0.087	127.141
Ic1ccc(Nc2nc3N(C)C(=O)C(=Cc3cn2)c2c(Cl)cccc2Cl)cc1	735423	1	5.675	523.154
O=C([O-])[C@](O)(C1CCCC1)c1ccccc1	96637	0	1.063	219.256
O(CC)c1cc2[C@@H]3[C@H]([C@@H]4CC[C@H](O)[C@]4(CC3)C)CCc2cc1O	671043	1	4.17	316.435
F[C@H]1[C@@H](O)[C@@H](O[C@H]1N1C=CC(=O)NC1=O)CO	526645	0	-1.511	246.192
n1ccccc1\C=C\c1ccncc1	61719	0	1.943	182.221
s1c2cc(NC(OCC)=O)ccc2nc1N1CCCCCC1	281383	1	4.103	319.422
S(C(=O)C(SCCNC(=O)C)=O)CCNC(=O)C	89391	0	-0.477	292.375
O=C(c1c2c(ccc1)cccc2)c1ccccc1	6729	0	4.142	232.277
O(C)c1c(OC)cc(cc1OC)\C=C\1/C(=NN(C(=O)c2ccccc2O)C/1=O)C	652182	1	2.615	396.393
O=C1NC(=O)N(C)[C@@H]1c1ccccc1	52073	0	0.764	190.199
o1nc(OC)cc1CCC(=O)[O-]	303800	0	-0.677	170.143
Clc1ccc(cc1[N+](=O)[O-])-c1nc2SC=C(n2c1\C=N\[N-]C(=[NH2+])N)C	720138	1	2.552	377.809
o1c(nnc1C)CN1C(=Nc2c(cccc2)C1=O)CCC	748351	0	1.569	284.313
I\C(\Br)=C/1\c2c(-c3c(cccc3)C\1=O)cccc2	670789	1	4.516	411.032
s1c(ccc1\C=N\Nc1nc2c(cc(cc2)C)c(c1)C)C	683919	1	5.245	295.402
Clc1cc2c(SC\C(=C/c3cc(OCC(=O)c4ccc(OC)cc4)ccc3)\C2=O)cc1	744623	1	5.845	450.934
Clc1ccc(cc1)\C=C(/Cl)\C1=Nc2c(NC1=O)cccc2	741903	0	3.998	317.169
N#CCCC1(C=C(c2c1cccc2)CCC#N)CCC#N	62569	0	2.997	275.348
[NH3+]C[C@@]1([C@@H]2CCc3cc(ccc3[C@]2(CCC1)C)C(C)C)C	65238	1	3.86	286.475
S(CC)c1nc2N(C)C(=O)N(C)C(=O)c2n1C	8811	0	1.332	254.309
S(=O)(=O)(n1nnc(CCC)c1CCC)c1ccc([N+](=O)[O-])cc1	120584	0	3.732	338.382
S(F)(=O)(=O)c1cc(NC(Oc2ccc([N+](=O)[O-])cc2)=O)ccc1	210258	0	2.687	340.284
N=C1c2c(-c3c(cccc3)C1=N)cccc2	684322	1	2.917	206.243
O(CCCCOC=C)C=C	43556	0	1.103	142.196
O=C1c2n3c(nc2C(=N)C(NC(=O)C)=C1C)[C@@H](OC(=O)CC)CC3	652729	1	0.547	330.339
Clc1c(Cl)c(oc1C(OC)=O)[N+](=O)[O-]	616362	1	2.428	239.998
O(C)c1cc(ccc1OC)C=1N(Cc2ccccc2)C(=O)C(C#N)=C(C=1)c1n(ccc1)C	746908	0	4.089	425.479
O1c2c(OC1)cc1c(c2)C(=O)C2=C1N(CCC[NH2+]CCCC(OCC)OCC)C(=O)c1cc(OC)c(OC)cc12	728092	1	1.404	553.623
Clc1ccc(cc1)[C@@]1(OC(=O)C(C1)=C)CN1C=C(C)C(=O)NC1=O	668257	1	2.345	346.765
O(C(=O)c1ccc(NCC#C)cc1)CC	202883	0	3.035	203.237
FC(F)(F)c1cc(cc(N2CC[NH+](CC2)CC(=C)c2ccc(cc2)C(=O)Nc2ccccc2N)c1)C(F)(F)F	735403	1	4.406	549.531
O=CNCC	404522	0	-0.357	73.0938
Clc1cc(Cl)cc(C[NH+](C)C)c1O	14546	0	1.429	221.104
Clc1cc2[n+]([O-])c(C(OCC)=O)c([n+]([O-])c2cc1)C(F)(F)F	749071	1	2.273	336.651
Clc1n(c2c(cccc2)c1\C=C\1/c2c(NC/1=O)cccc2)C	726904	1	3.689	308.762
O(C)c1ccc(cc1)CCNC(=O)c1[n+]([O-])c2cc(OC)ccc2[n+]([O-])c1C	744522	0	1.397	383.398
Clc1cc(C[NH2+]C2CCCCC2)c(O)cc1	48426	0	2.417	240.749
O=C(N)CC	38708	0	-0.166	73.0938
O1c2cc(O)ccc2C=2Oc3c(c(O)c(C\C=C(\C)/C)c(O)c3C\C=C(\C)/C)C(=O)C=2[C@@H]1\C=C(\C)/C	710340	1	7.315	488.571
Brc1cc2c(O[Mn+2]3(Cl)O[C-](N[N@H+]3[CH-]2)c2ccccc2)cc1	607088	1	3.054	409.544
S=C(N(CC)CC)[N-]\N=C\c1cc([N+](=O)[O-])ccc1O	673837	1	3.609	295.337
O=C(Nc1cc(ccc1)-c1ccccc1)N1CCN(CC1)C(=O)Nc1cc(ccc1)-c1ccccc1	37553	0	4.978	476.569
O1CC=C(\C=C\[C@@H]2[C@]3([C@H](CCC2=C)[C@](COC(=O)C)(C)[C@@H](OC(=O)C)CC3)C)C1=O	747449	0	3.337	416.507
O=C([O-])c1ccccc1\C=N\N1CCCCCC1	82283	0	1.093	245.297
O(C)c1cccc(C=O)c1O	2150	0	1.33	152.147
O1[C@@H]2[C@@H](C[C@H]3O[C@@]3(CC[C@@H]3O[C@]3(CCC[C@@H](C)[C@@H]2O)C)C)C(=C)C1=O	687104	1	2.596	350.449
S=C1NC(N(N=O)C1(C)C)(C)C	92753	0	0.958	187.263
FC(F)(F)C(=O)NCCC[N@@H+](Cc1cc2c(cc1)cccc2)CCCC[N@@H+](Cc1cc2c(cc1)cccc2)CCCNC(=O)C(F)(F)F	685981	1	3.649	676.735
ClCCN(CCCl)c1ccc(cc1)C[C@@H](NC(=O)[C@@H]([NH3+])CCC(OCC)=O)C(OCC)=O	683777	1	1.756	491.428
Oc1cc(nc2c1cc(cc2)C(=O)c1ccccc1)C	109747	0	3.461	263.291
s1c2c(nc1C=1C(=O)CN(C=1N)c1cc(OC)ccc1)cccc2	732786	1	3.141	337.396
OC1[C@@H](O)CC(C[C@@H]1O)C(OC)=O	62511	0	-1.024	190.194
Fc1ccc(cc1)C(=O)CCC[NH+]1CCC2(N(CN(CCC)C2=O)c2ccccc2)CC1	665742	1	2.581	438.558
O(Cc1ccccc1)c1ccc([N+](=O)[O-])cc1NC(=O)C	99767	0	2.411	286.283
Clc1ccccc1OCC(=O)[O-]	8454	0	0.485	185.584
[Si](Oc1c(cc(cc1COC(=O)C)CCC(=O)NCCNc1c2c([nH+]c3c1cccc3)cccc2)COC(=O)C)(C(C)(C)C)(C)C	719209	1	7.579	644.852
S(SCC(=O)N)CC(=O)N	28727	0	-0.907	180.249
[n+]1(ccn(c1)C)CCCCCCCCCCCCCCCCCC	747270	1	8.981	335.59
Clc1cc(cnc1N\N=C(\c1ccccc1)/c1ncccc1)C(F)(F)F	693628	1	5.366	376.763
O1c2c(cc3OCOc3c2)[C@@H]([C@H](C)[C@@H]1Nc1ccc(cc1)C(OCC)=O)c1cc(OC)c(OC)c(OC)c1	675368	1	5.398	521.558
SC[C@H](Nc1c2c([nH+]c3c1cccc3)c(ccc2)C(=O)NCC[NH+](C)C)C(=O)[O-]	692641	1	-0.203	413.513
O=C1N(CC(=O)C)C(=Nc2c1cccc2)C[NH+]1CC[NH+](CC1)C	743242	0	-2.541	316.398
Clc1nc(Cl)nc2ncn(c12)C	7853	1	1.697	203.029
S(=O)(=[NH])(CCC)CC[C@@H]([NH3+])C(=O)[O-]	344006	0	-2.637	208.279
N#CC1([C@H]2[C@@H]3[C@H]([C@H](C=C2)C1(C#N)C#N)C=CC3)C#N	167550	1	1.054	246.267
Brc1cc(Br)cc2c1O[Zn+2]134(O[C-](N[N@H+]1[CH-]2)c1ccccc1O)O[C-](N[N@H+]3[CH-]c1c(O4)c(Br)cc(Br)c1)c1ccccc1O	617588	1	6.15	893.507
O=C(Cc1ccccc1)c1ncccc1	111851	0	2.546	197.233
O(C)c1c(OC)cc(cc1OC)CC[C@@H](NC(=O)C)c1cc(OC)ccc1	36560	0	3.281	373.443
s1c2CCC[C@H]3CC(=O)N(N=C3c2cc1)C[NH+]1CC[NH+](CC1)C	747942	0	-1.223	334.48
N(/Nc1ccccc1)=C(/C(=N/Nc1ccccc1)/C)\C	24949	0	3.491	266.341
Clc1cc2NC(=CC(=O)c2cc1)c1ccccc1	644949	1	3.625	255.699
s1c2N=C(NC(=O)c2c(C)c1C)/C(=C(\O)/c1ccc(F)cc1)/C#N	745809	0	2.886	341.359
Clc1ccccc1\C=C\1/Sc2sc(C(OCC)=O)c([n+]2C/1=O)C	658291	1	4.475	366.862
O=C1NC(=O)CC[C@@H]1C[C@H](O)[C@H]/1C[C@@H](C[C@@H](C)\C\1=N/[N-]C(=O)N)C	63832	1	0.467	337.394
O(C)c1ccc(cc1)-c1nc(nnc1-c1ccc(OC)cc1)N1CCN(CC1)C(=O)C[NH+]1CCN(CC1)c1ccccc1	749145	1	3.419	580.7
ICc1nc2cc(Cl)ccc2nc1CI	144163	1	4.94	444.438
O(C)c1cc(ccc1OC)-c1nc(n(c1)-c1ccccc1)-c1ccccc1	745615	1	5.338	356.417
P(=O)([O-])(c1ccc([N+](=O)[O-])cc1C)c1ccc([N+](=O)[O-])cc1C	129484	0	2.05	335.229
O=C(Nc1cc(ccc1C)C(C)C)Nc1ccc([N+](=O)[O-])cc1	46492	1	4.097	313.351
n1ccccc1/C(=N\Nc1ncnc2c1cccc2)/C	693246	1	2.804	263.297
Clc1cc([N+](=O)[O-])ccc1Cl	6295	0	3.053	192
S=C(Nc1c2c(ccc1)cccc2)Nc1c2c(ccc1)cccc2	74417	0	6.183	328.43
O(C(=O)CC[NH+]1CCN(CC1)c1cc(ccc1)C)CC	87126	0	1.179	277.382
FC(F)(F)c1cc(ccc1)COC(=O)CN1NC(=O)c2c(cccc2)C1=O	746348	0	2.48	378.302
ICC(=O)Nc1cc2c(NC(=O)C=C2C(=O)[O-])cc1	72865	0	-0.303	371.107
O1C(=C(C=CC1=O)c1cc(O)c(OC)cc1)c1cc(OC)c(OC)c(OC)c1	741290	1	3.242	384.379
S1C[N@@H+](CN(CCC)C1=S)CCC	166025	0	2.31	219.391
S=C(N(Cc1ncccc1)Cc1ncccc1)[N-]\N=C/c1ncccc1	689534	1	3.833	361.443
Cl\C(=N/OC(=O)Nc1ccc(OC(F)(F)F)cc1)\CCC	682840	1	5.077	324.683
[NH2+]=C(N\N=C/Cc1ccccc1)C(=[NH2+])N\N=C\Cc1ccccc1	46958	0	1.774	322.407
N1=C2N(c3c(C=C2c2c1cccc2)cccc3)C	687968	1	3.914	232.28
O=C([O-])C(CCCc1ccccc1)C(=O)[O-]	23243	0	-0.479	220.221
S1CCS(=O)[C@@H]1[C@@]1([C@@H]2N(C3=C1C(=O)c1c(cccc1)C3=O)CCC2)C#N	628507	1	1.621	384.472
O(C(=O)CC=1c2c(CCC=1CCC(OC)=O)cccc2)C	27922	0	3.055	288.338
Clc1ccccc1C(=O)c1cc(ccc1O)C	11161	0	4.142	246.689
O=C(Nc1cc(ccc1)C=1Nc2n(ncn2)[C@@H](C=1)c1ccc(cc1)C)C	745695	0	2.867	345.398
Clc1cc(Nc2nc(nc(N)c2)N)ccc1Cl	42137	0	3.036	270.118
O1[C@H](CC(C)=C(CO)C1=O)[C@H](C)[C@@H]1CC[C@H]2[C@H]3[C@H](CC[C@]12C)[C@@]1([C@@]2(O[C@@H]2C3)[C@@H](O)C(N2CC2)=CC1=O)C	339665	1	2.977	511.65
Clc1ccc(-n2nc(C(=O)N3N=C(CC3=O)C)c(O)c2)cc1	748377	1	2.072	318.715
O(C(C)(C)C)C(=O)N1Cc2c(nc3c(c2)cccc3)C1	166697	0	2.892	270.326
S=C(N(C)C)[N-]\N=C(/C)\c1[nH]ccn1	376268	1	1.533	210.279
Clc1cc(ccc1C(=O)Nc1ccc(cc1)C1=[NH+]CCN1)C(=O)Nc1ccc(cc1)C1=[NH+]CCN1	60339	0	2.431	488.969
O1C[C@H]2[C@@H]([C@H](c3cc(OC)c(OC)cc3[C@H]2Nc2ccc(cc2)C#N)c2cc(OC)c(O)c(OC)c2)C1=O	642328	1	3.96	516.542
S(CC[NH+]1CCCC1)C=1N(c2ccccc2)C(=S)N(C(=O)C=1C(=O)C)c1ccccc1	703439	1	4.025	452.612
O=C(N1CCN(CC1)c1ccccc1C)c1cccnc1	93292	0	2.209	281.352
O1C[C@@H](OC[C@H]1C[NH+]1CCOCC1)C[NH+]1CCOCC1	54153	0	-3.674	288.383
s1c2c(CCC2)c(C(=O)N)c1NC(=O)CSc1nc2n(n1)C(=CC(=N2)C)C	744161	0	2.22	402.494
O=C1N(C=C(C=C1)C(=O)N\N=C\C=C/1\N(c2c(cccc2)C\1(C)C)C)C	746501	0	1.583	350.414
S=C1N=C(NC=2NC(=S)NC1=2)N	29189	0	0.478	199.257
S1c2c(N(C)C1=C)cccc2	73711	0	3.046	163.239
Clc1cc(Cl)ccc1C(=O)Nc1ccccc1-c1ccccc1	6943	0	5.461	342.219
O1[C@@H]2[C@@H](C[C@@H](O)[C@H](C)[C@@](O)(C(=O)\C=C\C)[C@H]2OC(=O)[C@@H](CC)C)C(=C)C1=O	701593	1	2.385	380.432
O=C1CC(c2c(cccc2)C1(C)C)(C)C	43347	0	3.257	202.292
O1[C@@H](CC=CC1=O)CCCCC	720841	1	2.979	168.233
O=C1[C@@H]2CC[C@@H](C2)[C@@H]1C(=O)c1ccc(cc1)C	129680	0	3.067	228.286
s1cccc1C(=O)c1[n+]([O-])c2cc(ccc2[n+]([O-])c1C(F)(F)F)C	729177	1	3.249	354.304
S(=O)(=O)(NN)c1ccc(cc1)C	18715	0	0.529	186.231
O(C)c1cc2nc3c([nH]nc3N)nc2cc1	700694	1	1.341	215.211
O=C1N(CCCCCCN2C(=O)c3c(cccc3)C2=O)C(=O)c2c1cccc2	76816	0	3.098	376.405
Brc1c(C)c(cc(C)c1O)C1(OS(=O)(=O)c2c1cccc2)c1cc(C)c(O)c(Br)c1C	86166	0	6.964	568.275
O=C(CCC(=O)[O-])c1cc(ccc1C)C	215276	0	0.913	205.23
Fc1ccc(cc1)C[N+](CCCCCCCCCCCCCCCC)(C)C	693172	1	7.557	378.63
Brc1c(Br)c(Br)c2c(c1Br)C(=O)NC2=O	93908	0	3.65	462.715
O=C1NCCCC[C@H]1NC(=O)[C@@H](OC)[C@@H](O)[C@@H](O)[C@@H](OC(=O)CCCCCCCCCCCCC)\C=C\C(C)C	646847	1	5.617	568.786
S(C(=O)c1ccccc1)C[C@@H](NC(OCc1ccccc1)=O)C(=O)[O-]	96699	0	1.805	358.388
Brc1oc2c(c1)C(=O)c1c(cccc1)C2=O	701985	1	2.771	277.07
O1CC(=C(c2cc(OC)c(OC)cc2)C1=O)c1ccc(OC)cc1	727208	1	3.296	326.343
O(CC)C(=O)N(CC)c1ccccc1	6776	0	2.497	193.242
O1[C@H](CO)[C@@H](O)[C@@H](O[C@@H](C(=O)N[C@H](C(=O)N[C@@H](CCC(=O)NCCCNc2c3c([nH+]c4c2cccc4)cccc3[N+](=O)[O-])C(=O)N)C)C)[C@H](NC(=O)C)[C@@H]1OCc1ccccc1	677597	1	0.537	861.917
Clc1cc(ccc1Cl)\C=C\1/CN(C\C(=C/c2cc(Cl)c(Cl)cc2)\C/1=O)C(=O)C=C	638644	1	6.522	467.172
O=C1c2c3n(-c4c1cccc4)cnc3ccc2NCCC[NH+]1CC[NH+](CC1)CCC[NH3+]	695940	1	-2.224	421.558
O1c2c3-c4c(cccc4)C(=O)c4nccc(c34)cc2OC1	215254	1	2.877	275.258
[nH]1ncc2c1ncnc2NCCc1ccccc1	11641	0	2.146	239.276
Clc1ccccc1[C@H]1O[C@@H](CC2(OC(=O)C(C2)=C)C1)c1ccccc1Cl	617129	1	5.004	389.272
Clc1nnc(Cl)cc1Sc1ccccc1N	301167	0	3.331	272.154
O(CC)c1ccccc1[C@@H](O)C1=CC(=O)c2c(cccc2)C1=O	58008	0	3.058	308.328
O=C1CC[C@@]2([C@@H]3[C@H]([C@@H]4CC[C@H](C(=O)C)[C@]4(CC3=O)C)C[C@@H](O)C2=C1)C	9727	0	1.546	344.445
Clc1cc(Cl)ccc1C1=Nc2c(NC1)cc([nH+]c2N)[N-]C(OCC)=O	341931	1	3.347	380.229
[Cu+]12[SH]=C(N3CC4CCC(CC4)C3)[N-][N@H+]1[C-](C=1N2NC=CC=1)C	633269	1	0.767	368.988
[Fe+2]12(Cl)(Cl)(Cl)N(N[C@@H]3N1C=CC=C3)[C-]([C@@H]1N2C=CC=C1)c1ccccc1	625539	1	3.188	438.54
S(=O)(=O)(N)c1cc(N)ccc1	7542	0	-0.212	172.205
S(Cc1ccccc1)c1nc(nc2n(cnc12)CCO)N	82646	0	1.871	301.367
s1cc2c(N=CNC2=S)c1[C@H]1O[C@H](CO)[C@H](O)[C@@H]1O	670036	1	-0.385	300.354
O1C[C@H](OC[C@H]1OC(=O)C)OC(=O)C	53710	0	-0.184	204.177
Brc1oc(cc1)\C=C(/Br)\C(=O)C	741412	1	2.444	293.94
O1c2c(cc3OCOc3c2)[C@@H]([C@@H](C)[C@H]1[NH+]1CCOCC1)c1cccc(OC)c1O	666214	1	1.793	400.445
O(CC)c1ccccc1[C@@H]1NC(=O)c2c(N1)cccc2	158389	1	2.781	268.31
O(CCCC[NH+]1CC[NH+](CC1)CCCCOc1cc2N=C[C@H]3N(CCC3)C(=O)c2cc1OC)c1cc2N=C[C@H]3N(CCC3)C(=O)c2cc1OC	723734	1	0.714	688.856
S1\C(=C/c2cc(OC)ccc2)\C(=O)[N-]C1=S	108925	0	2.928	250.317
Fc1cc(NC(=O)C2=Cc3cc(CCCCCC)c(O)cc3OC2=N)ccc1	709579	1	5.429	382.428
o1c2cc([nH]c2cc1-c1ccccc1)C(=O)N\N=C\C1=COc2c(cccc2)C1=O	745532	0	3.884	397.383
Clc1cc(NC=2C(=O)N=CNC=2[O-])ccc1	61911	0	0.664	236.634
O(C)C1=NC=2N=C(N(CC=2C(=O)N1C)Cc1ccccc1)C	748130	0	1.667	298.34
O1c2cc([C@H](C)c3cc(OC)c(OC)c(OC)c3)c(OCCO)cc2OC1	352876	1	3.219	376.4
s1cnnc1N1CCN([N+](=O)[O-])C1=O	156616	0	1.652	215.19
FC(F)(F)\C(=C/C(OC=1C(=O)C[C@]2([C@@H](C[C@H]3OC(=O)[C@H](O)[C@@H]4[C@@]35[C@H]2[C@@H](O)[C@@H](O)[C@]4(OC5)C(OC)=O)C=1C)C)=O)\c1ccccc1	656902	1	1.292	636.566
O(C)c1c(OC)cc(cc1OC)\C=C/c1ccc(OC(=O)C)cc1	638497	1	3.534	328.359
s1c2c(CCCC2)c(C(=O)N)c1NC(=O)c1ccc(cc1)C(OC)=O	746345	0	2.642	358.412
O=C1c2c(cccc2)C(=O)C1C(=O)C(C)(C)C	31211	0	2.577	230.259
o1n[n+](c(-c2ccccc2)c1[NH-])-c1ccccc1	59409	0	3.934	237.257
O=C(N[C@@H](CC(=O)N)C(=O)[O-])c1ccccc1	23805	0	-1.717	235.216
S1c2c(NC(=O)C=C1C)cccc2	117330	0	1.84	191.25
S(=O)(=O)(CCc1ccccc1)CS(=O)(=O)CCc1ccccc1	50406	0	3.169	352.468
O=C1C=C[C@]2([C@H](C1)CC[C@H]1[C@@H]3C[C@H](O)[C@H](O)[C@]3(CC[C@@H]12)C)C	66030	0	2.311	304.424
O(CCn1c(ncc1[N+](=O)[O-])C)C(=O)N	329676	0	-0.168	214.179
o1c(ccc1[N+](=O)[O-])[CH-][N@H+]([O-])CCO	303603	0	0.276	201.157
Clc1cc2-c3c(C4=N[C@@H](CN4c2cc1)CC)cccc3	165967	1	4.153	282.767
O1c2c(cccc2)C(=O)C(C(=O)c2ccc(OC)cc2)=C1CCC	748011	0	4.229	322.355
S(Oc1ccccc1-c1ccccc1)(=O)(=O)c1ccc(cc1)C	95779	1	4.969	324.394
O=C1N2C(=N[N-]1)C=C(C=C2C)C	76006	0	0.781	162.169
O(C)c1cc2-n3[n+](C)c(cc3/C(/c2cc1)=C\c1ccc(N(C)C)cc1)-c1ccccc1	715776	1	6.177	408.515
[Ga](Cl)(Cc1ccccc1N(C)C)Cc1ccccc1N(C)C	662157	1	4.597	373.573
O=C1N(NC(=O)C)C(=O)c2c1cccc2	238884	0	0.031	204.182
Brc1c2nc(OCC)nc(OCC)c2[nH]c1C(OCC)=O	105008	0	3.742	358.188
O(C1CCCC1)c1nc2N(C)C(=O)N(C)C(=O)c2n1C	106196	0	1.827	278.307
S=C(N1CCCCCC1)[N-]\N=C(/C)\c1nccnc1C	359708	1	3.023	290.407
O=[N+]([O-])c1c2c([nH+]c3c(cccc3)c2NCCC[NH2+]CC[NH+](C)C)ccc1	674699	1	0.343	370.469
S(C)c1nc(nc2n(cnc12)CCCC)N	40667	0	2.155	237.325
S(C(C)(C)C)c1nnc(SC(C)(C)C)c2c1c(O)nnc2SC(C)(C)C	625235	1	5.836	412.636
S1\C(=C/OCC)\C(=O)N(CCc2cc(OC)c(OC)cc2)C1=S	164998	0	3.207	353.456
O=C(CC(=O)NC1CCCCCC1)C	97561	0	1.599	197.274
S1[C@](CC)(c2ccccc2)C(=O)N=C1N	17167	0	2.654	220.291
[nH]1nc(nc1-c1ccccc1)N	34794	0	1.289	160.176
O=C1N(CC[NH+]2CCCC2)C(=O)c2c3c1cc(N)cc3ccc2	308849	1	0.063	310.37
Brc1ccc(N[C@H]2CCCCC2=O)cc1	109358	0	3.272	268.15
O1[C@@H](O[C@H]([C@@H](O)CO)[C@H](O)[C@H]1CO)c1ccccc1	60752	0	-0.522	270.278
Clc1cc2N3C(Sc2cc1Cl)=NC(C(C(OCC)=O)C(OCC)=O)=C(C#N)C3=N	748769	0	3.855	453.299
O1[C@H](C)[C@H](O)[C@@H](O)[C@@H](O)[C@@H]1O[C@H]1C[C@H]2[C@H]3[C@@H]([C@@]4(C(C[C@@H](O)CC4)=CC3)C)[C@@H](O)C[C@]2(C)[C@H]1[C@@H]([C@@H](O)CCC(C)C)C	693185	1	3.009	580.793
S(CC[NH+]1CCCCCC1)C=1N(c2ccccc2)C(=S)N(C(=O)C=1C(=O)C)c1ccccc1	703440	1	4.937	480.665
S(C)C1=NC(=O)C=CN1CC=C	88805	0	1.277	182.243
Oc1cc(ccc1O)\C=C\c1nc(ccc1)\C=C\c1cc(O)c(O)cc1	711993	1	4.54	347.364
OC(c1ccccc1C)(c1ccccc1C)c1ccccc1	29128	0	5.249	288.383
S=C1NC(=O)C(Cc2ccccc2)C(=O)N1	120787	0	1.802	234.274
O(Cc1ccccc1)c1c(OC)c(OC)ccc1C(=O)CC	98684	0	3.771	300.349
O(C)c1c2c3c(n(c2ccc1)CC(OC)=O)-c1c(cccc1)C3=O	741119	0	3.404	321.327
Oc1c([N+](=O)[O-])cc2c(cccc2)c1O	152010	0	2.148	205.167
Fc1ccc(cc1)C1([NH2+]C)CCCCC1	102801	0	2.057	208.295
O(C(=O)c1nc2c(nc1Nc1ccc(cc1)C(=O)N[C@H](CCC(OCC)=O)C(OCC)=O)cccc2)CC	670678	1	4.04	522.55
O=C1c2c(n(cc2CO)C)C(=O)C=C1N1CC1	732423	1	0.333	232.235
O1[C@@H](CO)[C@H](O)[C@H](O)[C@@H](\N=C\c2ccc(OC)cc2)[C@@H]1O	40582	0	-0.322	297.304
Clc1nc(Cl)nc(Cl)c1Cc1ccccc1	92504	1	4.628	273.546
Oc1ccc(NC(=O)\C=C(\C=C\C=C(\C=C\C=2C(CCCC=2C)(C)C)/C)/C)cc1	374551	1	6.463	391.546
O=C(\C(=C\c1ccccc1)\C[NH2+]C(C)(C)C)c1ccccc1	109156	1	2.9	294.411
O1C[C@H]2[C@@H]([C@H](c3c(C2)c(OCC)c2OCOc2c3)c2cc(OC)c(OCC)c(OC)c2)C1=O	35729	1	3.889	456.485
O(CCc1ccccc1)C(=O)\C=C\C	5683	0	3.025	190.238
Brc1ccccc1\C=C\1/SC(=S)[N-]C/1=O	49915	0	3.693	299.187
O1c2c(OC1)cc1NC(=CC(=O)c1c2)c1cc(OC)ccc1	649118	1	2.713	295.289
s1cccc1-c1nc2c(n1CCCCOc1cc3N=C[C@H]4N(CCC4)C(=O)c3cc1OC)cccc2	744016	1	5.209	500.612
O(C(=O)c1ccccc1C(=O)[O-])[C@H]1CCCCCC[C@H]1C	117543	0	2.931	289.346
O(C)c1cc2c(C3=C(N(CCC[NH3+])C2=O)c2c(cc(OC)cc2)C3=O)cc1OC	737344	1	0.394	395.428
Clc1cccc(F)c1[C@@H](NC(=O)c1n(C)c(cc1)C#N)C	745840	0	3.63	305.735
s1c(ccc1[N+](=O)[O-])C[N+](CCNC(=O)c1c2[nH+]c3c(cccc3C)c(N)c2ccc1)(C)C	691247	1	2.702	465.568
Br[C@]1(C)C(=NNC1=O)c1ccc(OC)cc1	109913	0	2.006	283.121
[NH+]=1CCNC=1n1nc(cc1C)C	379414	0	0.663	165.216
Clc1cc(ccc1Cl)-c1c(nc(nc1N)N)C	7364	1	2.747	269.13
S(=O)(=O)(N(OCCCON(S(=O)(=O)c1c(cc(cc1C)C)C)CCCCCC[NH3+])CCCCCC[NH3+])c1c(cc(cc1C)C)C	707023	1	3.826	670.967
IC=1N([C@@H]2O[C@H]([C@@H]3OC(O[C@H]23)(C)C)CO[Si](C(C)(C)C)(C)C)C(=O)NC(=O)C=1C#C[Si](C)(C)C	743559	1	5.314	620.625
Cl/C(/[N+](=O)[O-])=C/C(/[N+](=O)[O-])=C(/Nc1ccc(cc1C)C)\Nc1ccc(cc1C)C	673141	1	6.388	416.858
O(C)c1c(OC)cc(cc1OC)CCc1ccc(OC)cc1	631366	1	4.195	302.365
S=C(N1CCCCCC1)N1CC1	69368	0	2.921	184.302
O(C)C=1C(=O)C(Nc2ccc(OC)cc2)=C(OC)C(=O)C=1Nc1ccc(OC)cc1	95137	0	2.21	410.42
n12nc(nc1N=C(C=C2C)C)N	106484	0	0.58	163.18
s1cc(nc1-c1ccc(OCCC)cc1)-c1ccc(N)cc1	281624	0	4.267	310.413
ClCCN(CCCl)c1ccc(OCC(O[C@H]2CC[C@H]3[C@H]4[C@H](CC[C@]23C)[C@@]2(C(=CC(=O)NCC2)CC4)C)=O)cc1	620480	1	6.071	577.582
Oc1ccc(cc1)C\C=C(\C)/C	407855	0	3.444	162.228
Brc1cc(C)c(N)cc1	7093	0	2.317	186.049
Oc1cc(ccc1)-c1c(C#N)c(nc(NCc2ccccc2)c1C#N)NCc1ccccc1	734406	1	5.576	431.489
O=C(N)C1c2c(C=Cc3c1cccc3)cccc2	337777	0	2.517	235.281
Clc1ncnc2n(cnc12)C(OCC)=O	91809	0	1.621	226.62
S(Cc1ccccc1)c1nc(c2c(n1)N=C(NC2=O)Nc1ccc(S(=O)(=O)Nc2nc(cc(n2)C)C)cc1)-c1ccc(O)cc1O	745480	0	5.066	654.719
Clc1cc2c(N(C)C(=C)C2(C)C)cc1	158263	1	3.573	207.699
O(CC)c1ccc(OCC)cc1N	7486	0	1.748	181.232
Clc1c2NC=CC(=O)c2cc2n(OC)nnc12	748936	0	-0.696	250.641
S=C(N)[N-]\N=C\c1ncccc1NC	266748	1	1.378	208.263
S(=O)(=O)(n1cc(c2c1cccc2)[C@@]1(O)C[C@@H](OC1=O)CC#N)c1ccc(cc1)C	743898	1	3.056	410.443
Cl[C@H]1CC(=O)N(C1=O)c1ccccc1	52616	0	1.542	209.629
O(C(=O)c1ccccc1C(OCC)=O)C1CCCCC1	2429	0	3.747	276.328
O=C(Nc1ccc([N+](=O)[O-])cc1C)Nc1cc2c3c(n(c2cc1)CC)cccc3	320218	1	4.951	388.419
[As](=O)([O-])([O-])c1ccc(N2CN3C(=NC2)NN=C3)cc1	92574	0	-1.343	323.14
[nH]1c2c(nc1)nnnc2N	57048	1	-1.101	136.115
O=C([O-])CCC(=O)[O-]	106449	0	-3.308	116.072
S1(=O)(=O)N(CCCN2S(=O)(=O)c3c(cccc3)C2=O)C(=O)c2c1cccc2	15630	0	1.011	406.433
Clc1ccccc1C(Oc1ccccc1C)=O	11284	0	4.412	246.689
Oc1c([N+](=O)[O-])cc([N+](=O)[O-])cc1[N+](=O)[O-]	88054	1	1.271	229.104
O1CC2(COc3c(cc(cc3)C(C)(C)C)C[NH2+]CC[NH2+]CC[NH2+]Cc3cc(ccc13)C(C)(C)C)COc1c(cc(cc1)C(C)(C)C)C[NH2+]CC[NH2+]CC[NH2+]Cc1cc(ccc1OC2)C(C)(C)C	689450	1	1.732	925.378
O1[C@H](CC(C)=C(C)C1=O)[C@@](O)(C)[C@]1(O)CC[C@@]2(O)[C@H]3[C@H](CC[C@]12C)[C@@]1([C@@]2(O[C@@H]2C3)[C@@H](O)C=CC1=O)C	212509	1	1.572	502.597
ClCCOC(=O)c1ccc(cc1)C(C)C	20025	0	3.544	226.699
O(Cc1ccccc1)C(=O)[C@@H](NN)CC	338645	0	1.313	208.257
O=C1N[C@]2(C[C@@](CCC2)(C)[C@@H]1C#N)[C@H](C(=O)N)C#N	110758	0	-0.259	260.292
S=C1N=CNc2n(cnc12)CCCCC(=O)Nc1cc(O)c(cc1)C(=O)[O-]	89820	0	-0.129	386.405
S(=O)(=O)(N(C)c1ccccc1)c1ccc(cc1)C	43858	0	3.009	261.339
S=C(N1CCCC1)[N-]\N=C\c1nc(ccc1)C	661734	1	3.28	247.339
O(C(=O)C)C=1CCCCC=1	18899	0	1.629	140.18
S(=O)(=O)(Nc1ccc(cc1[N+](=O)[O-])C)c1ccccc1	28996	0	2.698	292.31
Clc1nc(Cl)nc2n(cnc12)CCOCCn1c2nc(Cl)nc(Cl)c2nc1	745357	1	3.089	448.094
s1c(C(OCC)=O)c(nc1SSc1sc(C(OCC)=O)c(n1)C)C	97416	0	4.089	404.548
Oc1ccccc1\C=N\c1nc(cc(c1)C)C	270329	0	3.341	226.274
[Sn](OC(=O)c1cc(OC)c(OC)cc1OC)(O[Sn](OC(=O)c1cc(OC)c(OC)cc1OC)(CCCC)CCCC)(CCCC)CCCC	643848	1	10.099	904.259
n1cnc2n(ncc2c1NCCCC)C	4931	0	1.776	205.26
Clc1c(S)c(Cl)c(Cl)c(Cl)c1Cl	5578	0	5.511	282.402
O[C@@]1(CC[N@@H+](C[C@@H]1C(=O)\C=C\c1ccc(cc1C)C)CC)\C=C\c1ccc(cc1C)C	691272	1	4.204	418.591
O=C1N=C(N=C2NN(N=C12)c1ccccc1)N	11826	0	0.455	228.21
Fc1cc(Nc2nc3N(CCC(C)C)[C@H](C)C(=O)N(c3cn2)C)cc(F)c1O	747342	1	4.069	391.415
O1[C@H]2C=3[C@H]([C@H](OC(=O)CCCCCCC)[C@@H](OC(\C(=C\C)\C)=C)C=3C)[C@](OC(=O)C)(C[C@H](OC(=O)CCC)[C@]2(O)[C@](O)(C)C1=O)C	299933	1	5.137	648.781
Clc1ccc(NC(=S)c2sc(cc2)C[NH+]2CCCCC2)cc1	710022	1	4.112	351.937
Clc1n(c2c(cc(OC)c(c2)C)c1\C=C\1/c2c(NC/1=O)cccc2)Cc1ccccc1[N+](=O)[O-]	723569	1	5.637	473.908
N([C@@H](CC)C)c1ccc(N)cc1	194887	1	2.142	164.247
Fc1ccc(cc1)C[NH2+][C@@H]1[C@H]2[C@H]([C@H](c3c1cc1OCOc1c3)c1cc(OC)c(O)c(OC)c1)C(OC2)=O	642281	1	2.586	508.515
ClCCOS(=O)(=O)CC	50257	0	0.639	172.63
Oc1ccc(cc1)C(=O)C	3698	0	1.327	136.148
S(C)C1=CC=C2c3c(cc(OC)c(OC)c3OC)C[C@@H](C2=CC1=O)CC(Oc1cc(ccc1)C#N)=O	648779	1	4.627	503.566
[n+]1(c2cc(N(C)C)c(cc2cc2cc(C)c(N(C)C)cc12)C)C	34606	1	5.131	308.441
O=C1NC(=O)NC(N)=C1\N=C\c1ccccc1	101650	0	0.069	230.223
O=C([C@H](C[NH+](CC)CC)C)\C=C\c1ccc(cc1)C	618766	1	2.367	260.394
[Pt+2](Cl)(Cl)(N)N1C=C2C(=CC=CC2)C=C1	662253	1	1.128	412.173
O(C)C=1C(=O)C(NC2CCCCC2)=C(OC)C(=O)C=1NC1CCCCC1	103402	0	2.25	362.463
O=C(Nc1cc([N+](=O)[O-])ccc1)[N-]N1CCCCCC1	89367	0	2.031	277.299
O1CC2=C(C=C3N(Cc4c3nc3c(c4)c(NC(=O)C[NH3+])ccc3)C2=O)[C@@](O)(CC)C1=O	639174	1	-1.1	421.426
OCCCCCCN1c2c(cccc2)C(=N)c2c1nc(cc2C)C	694521	1	4.387	323.432
O(Cc1ccccc1)c1ncc(cc1)C(=O)N	74438	0	1.787	228.247
S(=O)(CCCC)C[C@@H](NC(=O)\C=C\C=1C(=O)NC(=O)NC=1C)CO	241509	1	-0.542	357.425
O(CC)C(=O)/C(=C/c1ccc(cc1)\C=C(/C#N)\C(OCC)=O)/C#N	121231	0	2.852	324.331
[P+](CCCCCCCCCCC=1C(=O)C(OC)=C(OC)C(=O)C=1C)(c1ccccc1)(c1ccccc1)c1ccccc1	745025	1	9.333	583.717
Clc1ccc(-n2nc(-c3oc(nn3)-c3ccccc3)c(O)c2)cc1	724037	1	4.131	338.748
S=P(Oc1ccc([N+](=O)[O-])cc1)(OCC)c1ccccc1	8943	0	3.977	323.304
O1[C@@H]2[C@@H]3[C@@](CC[C@H]2C(=C)C1=O)(C=CC(=O)C3=C)C	720795	1	2.407	244.286
ClC(Cl)C(=O)N(Cc1ccc(Oc2ccc([N+](=O)[O-])cc2)cc1)CCOC(=O)CCC(=O)[O-]	107522	0	2.023	498.29
ClC1=C(OCCOCCOCCCC)C(=O)c2c(C1=O)c(O)ccc2O	660632	1	2.397	384.808
O=[N+]([O-])c1cc(ccc1NCCc1ccccc1)-c1c(nc(nc1N)N)CC	382049	1	3.693	378.428
O=C1C=C(c2c1cccc2)[C@H]1CCC[C@H]1C#CCCCCC#C	649435	1	6.875	302.409
O1c2c(OC1)cc1c(c2)/C(/C2=C1N(C)C(=O)c1cc(OC)c(OC)cc12)=C\CCCCC[NH3+]	727049	1	2.283	449.519
Clc1nc(N)c2ncn(c2n1)[C@H]1OC[C@H](O)[C@H](O)[C@@H]1O	101087	0	-1.025	301.686
O[C@H](C[NH+](CC)CC)C	6304	0	-0.705	132.224
O(C)c1cc2c(-c3c(c4c(nc3N3CCN(CC3)C(=O)C[NH2+]CC[NH2+]CCO)cccc4)C2=O)cc1	737611	1	-0.918	491.582
P1(OCC([N+](=O)[O-])(CO1)CC)(=O)N	110700	0	-0.333	210.125
Clc1cc(Cl)ccc1C(=O)C(Cl)Cl	81222	0	4.093	257.929
FC(F)(F)c1[n+]([O-])c2cc(ccc2[n+]([O-])c1C(=O)c1occc1)C(F)(F)F	740110	1	3.147	392.21
O=C1NC(=O)NC[C@H]1Nc1ccccc1	44135	0	0.432	205.213
[nH+]1c2c(cc3c(c2)cccc3)c(N[C@@H](CCC[NH+](CC)CC)C)cc1	722779	1	3.441	337.502
Clc1n(c2c(cc(OC)c(c2)C)c1\C=C\1/c2c(NC/1=O)c1c(cc2)cccc1)C	734206	1	5.067	402.873
O1[C@@H]2[C@H](C[C@@H]3[C@H](C=CC3=O)[C@@H](C2)C)C(=C)C1=O	264054	1	2.119	232.275
O1CC(=O)NCC1	11688	0	-1.072	101.104
Clc1cccc(Cl)c1\C=C/1\C(=O)NC(=O)NC\1=O	98006	0	2.193	285.083
S1[C@H](c2c(n(nc2C)C(=O)c2ccccc2O)NC1=N)c1ccccc1O	657990	1	3.593	380.42
O(C)c1c(OC)cc(cc1OC)CNc1ccc(cc1)C	650763	1	3.659	287.354
Clc1cc([N+](=O)[O-])ccc1	5502	0	2.388	157.554
O=C1N(C)C(=NC(=C1C#N)c1ccccc1)N1N=C(C)[C@@H](N=Nc2ccc(cc2)C(=O)[O-])C1=O	745585	0	1.483	454.418
O=C(Nc1ccc(cc1)C=1c2[nH]c(cc2)C(=C2N=C(C=C2)C(=c2[nH]c(cc2)=C(C2=NC=1C=C2)c1cc2c([n+](c1)C)cccc2)c1ccc(NC(=O)C)cc1)c1cc2c([n+](c1)C)cccc2)C	712202	1	11.088	861.001
[Pb](Cl)(CCCC)(CCCC)CCCC	168597	1	5.807	413.996
O=C(NCC[NH3+])c1c2nc3c(cc2ccc1)cccc3	617971	1	0.727	266.318
O(C)c1ccc(cc1)[C@@H](O)c1ccccc1[C@@H](O)c1ccc(OC)cc1	16435	0	3.812	350.408
O=C1NC(=O)NCC1(c1ccccc1)c1ccccc1	102070	0	2.031	266.295
S1C[N@@H+](CN(CC(=O)[O-])C1=S)CC(=O)[O-]	40461	0	-3.42	249.287
Fc1ccc(cc1)\C=N\NC(=O)C1CC1	72885	0	1.982	206.216
[SeH2]=C(N\N=C(/C)\c1ncccc1)N1CC2CCC(CC2)C1	323241	1	3.243	351.349
s1c2CCCCc2c2c1-n1c(nnc1S)N(Cc1ccccc1)C2=O	743473	0	4.333	368.476
Clc1ccc(cc1)C(C1=C([O-])C(=O)c2c(cccc2)C1=O)C1=C([O-])C(=O)c2c(cccc2)C1=O	117271	1	3.047	468.842
O1[C@@H](C)[C@H](O)[C@H](OC(=O)C)[C@H](O)[C@@H]1O[C@H]1[C@@H](O)[C@@H](OC(=O)C)[C@@H](O[C@H]1OC(=O)[C@H]1CC[C@H]2[C@@H](O[C@@]3(OC[C@H](C)[C@@H](OC(=O)\C=C\c4ccccc4)C3)[C@]23OC3)C1)C	332596	1	1.614	804.831
[nH]1c2c(nc1-c1cccnc1)cccc2	62610	0	2.12	195.22
Fc1ccc(cc1)\C(=N/[N-]C(=[NH2+])N)\c1ccccc1	68088	1	2.714	256.278
O1CC[NH2+]C12CCCCC2	128259	0	-0.269	142.219
n1c(cnnc1N)C	41276	0	-0.36	110.117
Clc1cc(N2CC[NH+](CC2)[C@@H](C(=O)N)C)ccc1	88432	0	0.391	268.762
O1[C@@]2([C@H]([C@H]3[C@H](CC2)[C@@]2([C@H](CC(=O)/C(/C2)=C\[O-])CC3)C)CCC1=O)C	38882	0	2.037	331.426
O=C(\C(=C\c1ccc(N(C)C)cc1)\C#N)c1ccccc1	637343	0	3.703	276.332
[NH2+]1[C@@H]2[NH+]3[C@@H]([NH2+]CC[C@@H]3[NH2+]CC2)CC1	81462	0	-5.303	186.298
O=C1[C@H]2CC[C@H](C2)[C@@H]1C[N@H+]([C@H](Cc1ccccc1)C)C	122387	0	1.972	272.405
OC1CCC(CC1)[C@H]1[C@H]2[C@H]([C@H]3[C@@H](CCCC3)[C@@H]1C1CCC(O)CC1)CCCC2	340256	1	6.265	388.626
s1cccc1C(=O)c1ccc(cc1)[C@H](C(=O)[O-])C	303611	0	1.84	259.3
ClC[C@H]1c2c3c(cc(NC(=O)C)cc3)c(O)cc2N(C1)C(=O)CCCCCC(=O)Nc1cc2c(c3c(N(C[C@H]3CCl)C(OC(C)(C)C)=O)cc2O)cc1	711695	1	5.636	763.706
s1cccc1\C=C\C(=O)c1ccccc1	110936	0	3.655	214.283
O(CCCNc1c2c([nH+]c3c1cccc3)cccc2)C	682360	1	3.368	267.346
ClCCN(CC)c1cc(cc(NC(=O)c2ccc(cc2)C(=O)Nc2cc(cc(N(CCCl)CC)c2)C[NH+](C)C)c1)C[NH+](C)C	670013	1	2.777	643.69
Brc1ccc(cc1)-c1nc2Sc3cc(OC)ccc3-n2c1	741589	0	4.608	359.24
S(N=Nc1[nH]cnc1C(=O)N)C[C@H](NC(=O)C)C(=O)[O-]	684054	1	-2.009	299.286
O=C([O-])c1c2c(cc(cc2)C(=O)[O-])ccc1	87585	0	-0.951	214.174
s1c2c(nc1-c1ccc(O)cc1O)cccc2	33005	0	3.354	243.281
Clc1cc(NS(=O)(=O)c2ccccc2)c(cc1)C	59991	0	3.468	281.758
O(C(=O)c1[nH]cnc1N=NN(CCO)C)CC	105766	0	0.596	241.247
Clc1ccc(S(=O)(=O)Nc2ccc(cc2)C#C[C@@H](N([O-])C(=O)C)C)cc1	749039	0	2.386	391.849
s1nc2-c3c(c(ccc3)C(=O)[O-])C(=O)c3c2c1ccc3	39938	0	1.718	280.278
O=C(n1nc(N)c(c1)-c1ccccc1)c1ccncc1	745494	0	2.088	264.282
O(CC)C(=O)N1CCCC1	26297	0	1.032	143.184
O(C)c1ccc(OC)cc1C1C(=CN(C=C1C(OC)=O)CC1=CC(=O)C(=CC1=O)C)C(OC)=O	727926	1	2.195	467.468
ClC1=C(N[C@H]([C@H](CC)C)C(OC)=O)C(=O)c2c(C1=O)c(O)ccc2O	661943	1	2.368	367.781
S1(=O)(=O)CC(=O)N([C@H]1c1cc(Oc2ccccc2)ccc1)c1ccc(OC)cc1	715068	1	3.767	409.455
O[C@@]1(CC[N@@+](C[C@@H]1C(=O)\C=C\c1ccccc1)(CC)C)\C=C\c1ccccc1	618770	1	2.465	376.511
[nH]1c2c(cccc2)c(Cc2c3c([nH]c2)cccc3)c1Cc1c2c([nH]c1)cccc2	708487	1	6.529	375.465
Clc1[nH]c2c(cc(OC)c(c2)C)c1\C=C\1/c2c(N(C)C/1=O)cccc2	711619	1	4.159	352.814
[nH]1cc(c2c1cccc2)-c1cc(nc2c1cccc2)-c1ccccc1	748517	0	5.775	320.387
S1(=O)c2c(Oc3c1cccc3)cccc2	3222	0	2.566	216.256
O\N=C/1\[C@@]2([C@H]([C@H]3[C@H](CC2)[C@@]2(C(=C/C(=N/O)/CC2)CC3)C)C\C\1=C/c1ccc([N+](=O)[O-])cc1)C	718183	1	5.514	449.542
Brc1cc2sc(nc2cc1)N	270077	0	2.457	229.097
ClC=1[C@@]2(Cl)[C@@H]3[C@H]([C@@](Cl)(C=1Cl)C2(Cl)Cl)C(=O)C=CC3=O	22205	1	3.142	380.866
Brc1ccccc1C(=O)c1c(cc(cc1C)C)C	11022	0	5.441	303.194
S=C1NCCCC1	343088	0	1.178	115.197
O1[C@H](CC=CC1=O)CCCCC	721360	1	2.979	168.233
Clc1cc(NC(=O)c2ccccc2Nc2cc([nH+]cc2)C(F)(F)F)c(O)cc1	748710	1	5.219	408.782
O[C@@]1(CC[N@@H+](C[C@@H]1C(=O)\C=C\c1ccccc1C)CC)\C=C\c1ccccc1C	682874	1	3.231	390.538
O1[C@@H]([C@H]([C@H](OC)[C@H](CCC(=O)[C@H]([C@H](OC)C\C=C\N(C=O)C)C)C)C)[C@@H](\C=C\[C@@H](O)C[C@@H](O)[C@H](\C=C\[C@@H](OC)C[C@H](OC)[C@H]([C@@H]2OC(=O)C=C(C[C@H](OC)C\C(=C\C=C\C1=O)\C)[C@@H]2O)C)C)C	671677	1	4.505	946.214
[n+]1(ccc(cc1)\C=C\c1ccccc1)C	77998	0	3.42	196.268
OCCc1ncccc1	2144	0	0.538	123.152
Ic1cc(C(=O)N)c(NC(=O)\C=C\c2ccccc2Cl)cc1	748148	1	3.327	426.636
FC(F)(F)c1[n+]([O-])c2c([n+]([O-])c1C(=O)C)cc(cc2)C(OCC)=O	748717	1	1.349	344.243
O(C)c1cc(ccc1OC)\C=N\[N-]C(=O)[N-]\N=C\c1cc(OC)c(OC)cc1	48239	0	2.801	384.386
O(C)c1c(C(=O)\C=C\c2ccccc2)c(OC)c(OC)c(OC)c1OC	255994	1	3.62	358.385
Clc1ccccc1\C=N\NC(=O)c1ccc([N+](=O)[O-])cc1	4491	0	3.242	303.7
S(C(=O)C)[C@@H]1CC(OC1=O)=O	57456	0	0.14	174.174
O=C1CC[C@H]2[C@H]3[C@@H]([C@@]4([C@H](CC=CC4)CC3)C)C(=O)C[C@]12C	113011	0	3.168	286.409
ClCCN(N=Nc1[nH]cnc1C(=O)N)CCCl	82196	0	0.986	279.126
S(\C(=C(\SC)/C#N)\C#N)C	14022	1	1.029	170.255
O1C=C(C(=O)c2c3c(ccc12)cccc3)c1cc(OC)c(OC)cc1	128306	0	3.742	332.349
O\1c2c(c3c(cc2)cccc3)C(=O)/C/1=C/c1cc(OCC(=O)c2ccc(OC)cc2)ccc1	744628	1	5.268	436.455
ClCC[NH+](CCc1ccccc1)CCCl	108713	0	1.994	247.184
Brc1cc2cc([C@H]3N(C(=O)[C@H]3Cl)c3ccc(OC)cc3)c(Cl)nc2cc1	716212	1	5.046	452.129
O=C(NNC(=O)c1ccc(cc1)C)c1c2c(ccc1)cccc2	88893	0	3.266	304.343
O1[C@H](CO)[C@H](O)[C@H](O)[C@H]1n1nc2c(ncnc2N)n1	133118	1	-1.84	268.229
O=C(C[C@H](C(=O)c1ccccc1)c1ccccc1)c1ccccc1	7759	0	4.684	314.377
[N+](C)(C)=C1C=CC(C=C1)=C(c1ccc(N(C)C)cc1)c1ccc(N(C)C)cc1	3090	1	4.923	372.526
O=C1NCCC1	4593	0	-0.371	85.1045
Clc1ccc([N+](=O)[O-])cc1C(=O)Nc1sc2cc([N+](=O)[O-])ccc2n1	699712	1	3.693	378.747
O(C)c1ccc(cc1)\C=C\1/C[C@H]2[C@H]3[C@H](CC[C@]2(C)[C@H]/1O)[C@@]1(C(=C[C@@H]([NH+]2CCCC2)CC1)CC3)C	716563	1	4.559	462.687
FC(F)(F)C1=CN([C@@H]2O[C@H](CO)[C@@H](O)C2)C(=O)NC1=O	75520	1	-0.782	296.2
O1[C@@H](COC(=O)c2ccccc2)[C@H](OC(=O)c2ccccc2)[C@@H](OC(=O)c2ccccc2)[C@@H]1OC(=O)C	23349	0	4.506	504.485
S(Cc1ccccc1)C1CCC(CC1)C	55782	0	4.488	220.374
Clc1cc(C)c(NC(=O)C=2N3C(SC=2C(=O)Nc2ccc(F)cc2)=NC(=CC3=O)CCC)cc1	743221	1	4.76	498.957
o1nc2c3c(ccc2c1)C(=O)c1c(cccc1)C3=O	628939	1	2.599	249.221
O1[C@]23[C@]1(\C=C(/C)\[C@@H](OC(=O)C)[C@@H](OC(=O)\C(=C/C)\C)[C@H]1[C@@H]([C@@H](OC(=O)C)[C@H](C)C2=O)C1(C)C)C(=O)[C@@H](C3)C	688219	1	3.321	530.607
O1c2c(OC1)cc1[C@H]3[C@@H]4[N@H+](CCC4=C[C@H](O)[C@H]3O)Cc1c2	401360	1	-0.848	288.318
BrC[C@@](Br)(CC[C@@H](Br)C(C)C)C=C	670791	1	4.975	376.954
Fc1cc2[n+]([O-])c(C#N)c([n+]([O-])c2cc1)[N-]C(=O)c1occc1	742807	0	0.941	313.22
O=C(n1c(c(nc1N)-c1ccccc1)-c1ccccc1)NC	317859	0	3.254	292.335
S(CC(=O)Nc1ccc(cc1)C(=O)[O-])C(=O)N	13346	0	-0.839	253.254
O[C@]([C@H]([C@H]1[NH2+]CCCC1)c1ccccc1)(C)c1ccccc1	38352	0	2.32	296.427
S(=O)(=O)(Nc1nc(cc(n1)C)C)c1ccc(NCn2c3c(nc2)cccc3)cc1	747593	0	2.786	408.477
ClC=1c2cc(OC)c(OC)cc2[C@H](Cl)C=1c1cc(Cl)c(Cl)cc1	623164	1	5.823	390.088
O=C1C=C2NC(=O)/C(=C/C=C\[C@@H](OC)[C@H](OC(=O)N)/C(=C/[C@@H](C)[C@H](OC(=O)C[NH+](C)C)[C@H](OC)C[C@@H](CC(=C1NCC=C)C2=O)C)/C)/C	683662	1	1.348	671.801
S(=O)(=O)(N(CC)CC)c1cc(N)c(Nc2ccccc2OC)cc1	746504	0	2.431	349.448
s1c2c(CCC2)c(C(=O)N)c1NC(=O)c1cc(S(=O)(=O)N(C)C)ccc1	746255	0	1.447	393.48
Clc1ccc(cc1)C(c1c2c(ccc1O)cccc2)c1c2c(ccc1O)cccc2	363003	1	7.085	410.892
Clc1c2[nH]cc(c2ccc1)C[C@@H]1NC(=O)N(C)C1=O	745841	0	2.043	277.706
O=C1c2c(N(c3c1cccc3)CC(=C)c1ccc(cc1)C(=O)Nc1ccccc1N)cccc2	736098	1	5.293	445.512
S(C)C1=CC=C2c3c(cc(OC)c(OC)c3OC)CC[C@H](NC(=O)C)C2=CC1=O	186301	1	2.602	415.503
s1c2cc([N+](=O)[O-])ccc2nc1NC(=O)CSc1n2S(=O)(=O)c3c(N(c2nn1)c1ccccc1)cccc3	743437	0	4.835	565.604
O=C1N2C(=NC(=O)[C@H]1c1ccccc1)C=C(C=C2)C	66439	0	1.666	252.268
O1C[C@]1(C)[C@@H]1c2c3Oc4c(cccc4O)C(=O)c3c(OC)cc2OC1	266491	1	2.324	340.327
[s+]1c2c(nc3c1cc(N(C)C)cc3)ccc(N(C)C)c2[N+](=O)[O-]	9403	1	4.121	329.397
S(c1cc2cc([nH]c2cc1)N1C(=N\C(=C/c2cc(OC)c(OC)c(OC)c2)\C1=O)c1ccccc1)c1ccccc1	716166	1	6.935	561.65
s1c(C(=O)N\N=C\c2occc2)c(nc1NC(=O)C)C	745907	0	0.77	292.314
O(C)c1cc(ccc1)CCNC=1c2c(-n3c(nc4c3cccc4)C=1C#N)cccc2	691219	1	5.248	392.452
O1c2c(OC1)cc1c(c2)C(=O)C2=C1N(CCCN=[N+]=[N-])C(=O)c1cc([N+](=O)[O-])ccc12	728979	1	2.702	419.347
Fc1ccc(cc1)C(OCC[NH+]1CC[NH+](CC1)CCCc1ccccc1)c1ccc(F)cc1	707476	1	2.992	452.579
o1c(ccc1[N+](=O)[O-])\C=C(/C(=O)N)\c1occc1	44973	0	1.587	248.192
Fc1cc2-c3nc(N)c(C#N)c(c3COc2cc1)-c1cc(OC)c(OC)cc1	731527	1	3.725	377.368
O=C1N(CC[NH+](C)C)C(=O)N2c3c1ccc1n(nc(-c4cc(N)ccc24)c13)CC[NH+](C)C	710550	1	-1.071	435.522
S(=O)(=O)(Cc1ccccc1)CC(=O)c1ccccc1	130341	0	2.618	274.335
O(C)c1cc(N=Nc2ccc(cc2)C(=O)N(C)C)c(cc1N)C	45564	0	3.336	312.366
BrC(Br)c1cc2c(nc1C(=O)c1ccccc1)c(Cl)ccc2Cl	642948	1	6.644	473.973
O=C1C=C(C)[C@]2(C)[C@@]1(C)C(C)=C2C	125874	0	2.695	176.255
Clc1ccc([N+](=O)[O-])cc1[N+](=O)[O-]	6292	0	2.283	202.552
O=C1N(Cc2ccccc2)C(=O)c2nccnc12	109855	0	1.001	239.229
P(OC)(OC)(=O)[C@@H](O)\C=C\C	705128	1	0.174	180.139
Clc1ccc(nc1)NCN1C(=O)c2c(cccc2)C1=O	142450	0	2.354	287.701
P(Oc1cc(ccc1)C(=O)Nc1ccc(cc1)C)(=O)(Nc1ccc(cc1)C)Nc1ccc(cc1)C	669807	1	5.886	485.514
O=C1c2c(cccc2)C(=O)C(NC(=O)C)=C1Nc1ccc(cc1)C	651778	1	2.158	320.342
O1c2cc(ccc2OC1)C(=O)C	21866	0	1.337	164.158
O(C)c1ccc(N2[C@]3(O)C=CC(O)=C(C#N)[C@@]3(C#N)C(C(OCC)=O)=C2C)cc1	741200	0	1.857	393.393
O1C(=C(c2c(cccc2)C1=O)c1ccccc1)c1ccccc1	55862	0	4.601	298.335
O(c1cc2c(N=CN(CCc3cc(OC)c(OC)cc3)C2=O)cc1NC(=O)C[NH+]1CC[NH+](CC1)C)c1cc(cc(c1)C)C	747173	1	1.323	587.709
O(C)c1c(OC)cc(cc1OC)/C(=C\c1ccc(OC)cc1)/C(OCC[NH+](CC)CC)=O	638408	1	2.841	444.541
IC1=CC(I)=CNC1=O	159398	0	0.241	346.892
Clc1cc(cc(Cl)c1O)C(OCC)=O	74473	0	3.12	235.064
Clc1cc(NP2(OCC([N+](=O)[O-])(CO2)C)=O)ccc1	114614	0	1.591	306.639
Clc1ccc(Nc2sc3c(n2)C(=O)c2c(cccc2)C3=O)cc1	631529	1	4.74	340.784
O1[C@H]2C[C@H](O)[C@@]3([C@H]([C@@H](OC(=O)c4ccccc4)[C@]4(O)C[C@@H](OC(=O)[C@H](OC(=O)CCC(=O)[O-])[C@@H](NC(=O)c5ccccc5)c5ccccc5)C(=C([C@@H](OC(=O)C)C3=O)C4(C)C)C)[C@@]2(OC(=O)C)C1)C	600221	1	1.805	952.971
O=C1C(N2C[C@H]2C)=C(NC(=O)C)C(=O)C(N2C[C@H]2C)=C1NC(=O)C	18273	0	-1.729	332.354
S=C1N(CCN1CCC#N)CCC#N	24909	0	1.505	208.283
O1CCN(CC1)C1=NC(=C(C#N)C(=O)N1C)c1ccc([N+](=O)[O-])cc1	745572	0	0.83	341.321
s1c(C(=O)NC2CCCCC2)c(nc1SC)N	294747	0	2.519	271.402
S(C)C1=NC(N)=C(C=O)C(=O)N1C	748127	0	0.052	199.23
FC(F)(F)c1[n+]([O-])c2c([n+]([O-])c1C(=O)CC)cc(cc2)C	729179	1	2.298	300.233
O(CC(=O)[O-])c1cc(ccc1O)C	34033	0	0.065	181.165
[Pt+2]12([P+](c3ccccc3)(c3ccccc3)c3ccccc3)C([C@]1(C)[CH2-])=C2C	646701	1	7.078	537.491
O(C)c1ccc(cc1)C1C(C(=O)C)=C(NC(C)=C1C(=O)C)C	150003	0	1.605	299.364
[NH+](CCC[C@](C#N)(C1CCCCC1)c1ccccc1)(C)C	28355	0	3.132	285.447
Clc1cccc(Cl)c1[C@@H]1SCC(=O)N1c1nc(O)cc(Cl)n1	746050	0	4.481	376.646
Clc1nc(nc(NCCCC)c1)N	23906	0	2.375	200.669
Clc1cc(ccc1Cl)Cn1nnc2c1NC(=NC2=O)N	29588	0	2.267	311.127
Clc1ccc(Nc2c([N+](=O)[O-])cc([N+](=O)[O-])cc2[N+](=O)[O-])cc1	157487	1	3.727	338.66
Clc1cc(N2CC[NH+](CC2)CC(=O)N2CCc3c([nH]c4c3cccc4)[C@@H]2c2cccnc2)ccc1	633398	1	2.916	487.016
O(C(=O)\C(=C\c1ccccc1[N+](=O)[O-])\C(OC)=O)C	126224	1	1.863	265.219
Fc1cc2C3=NN([C@@H](F)[C@H]3COc2cc1)c1ccccc1	731293	1	3.844	286.276
BrC1=C[C@]2(C([C@H]3OC(=O)[C@@H]([C@@H]3CC2)C)=C(C)C1=O)C	125343	0	3.054	325.198
Clc1ccc(Nc2nc(nc(n2)Nc2ccc(F)cc2)Nc2ccc(cc2)C2=NN(C(=O)C)[C@@H](C2)c2ccc(OC)cc2)cc1	745083	0	7.934	623.079
ClC1(Cl)[C@H]2CP(=O)(C[C@@]12C)c1c(cc(cc1C(C)C)C(C)C)C(C)C	709160	1	6.55	401.35
O(CC)C(OCC)[C@@H](NC(OCC)=O)C(OCC)=O	28060	0	1.192	277.314
O1[C@@](CC(=C)C1=O)(CN1C=C(C)C(=O)NC1=O)c1ccc(cc1)-c1ccccc1	668258	1	3.199	388.416
Clc1cc2-c3n(N=Nc2cc1)c1ncccc1c3N=O	747651	1	2.871	283.673
s1c2c([n+](C)c1\C=C\c1cc(OC)c(N(C)C)cc1)cccc2	662251	1	4.889	325.448
O(C)c1c2CC(C(OCC)=O)=C(c2ccc1OC)C	117500	0	3.02	262.301
Clc1cc(ccc1Cl)CCNc1nc2c(nc1-c1ccccc1)c(N)cc(N)c2	741584	1	5.329	424.326
Clc1cc(Cl)cc(C(=O)c2ccccc2C(=O)[O-])c1O	8639	0	2.476	310.109
O=C(NN)c1nc[nH]c1N=NN(C)C1CCCCC1	101345	0	1.022	265.315
Clc1ccc(cc1)\C=C/1\NC(=O)/C(/NC\1=O)=C\c1ncc(OCc2ccccc2)cc1	715806	1	3.423	431.871
O=C1NN=C2[C@H]1CCCCC2	131090	0	1.01	152.194
S(=O)(=O)(Nc1[nH]nc(c1)-c1ccc(cc1)C)\C=C\c1ccccc1	744177	0	3.261	339.411
O=C1NC(=O)NC(=O)C1(Cc1ccccc1)Cc1ccccc1	109107	0	2.809	308.331
O(Cc1ccccc1)c1ccc(nc1)\C=C/1\NC(=O)/C(/NC\1=O)=C\c1ccc(O)cc1	711721	1	2.516	413.425
O(CC)C(=O)Nc1c2c([nH+]c3c1cccc3)cccc2	129929	0	3.74	267.302
O1[C@H](c2c(c3c(cc2)cccc3)C1=O)c1ccc(OC)cc1C	640736	1	4.429	304.339
O1CC(COC1c1ccccc1)(CCCC)CC	7064	0	4.26	248.361
OCC#CC#CC#CC(=O)N	636326	1	0.48	147.131
Clc1c(CP(=O)([O-])[O-])c(Cl)c(Cl)c(CP(=O)([O-])[O-])c1Cl	107965	0	-1.526	399.873
FC1=CN(CC(=O)c2occc2)C(=O)NC1=O	166841	0	-0.245	238.172
S=C(N)\C(=C/c1cc2c3c(n(c2cc1)CC)cccc3)\C#N	726031	1	4.054	305.397
O1[C@@H](Cc2ccc(OC)cc2)[C@@H](OC12C=CC(=O)C=C2)Cc1ccc(OC)cc1	720704	1	4.38	392.444
Brc1cc(cc(Br)c1)C	87347	0	3.812	249.931
Fc1cc2Cc3cc(\N=C\4/OC(=O)C=C/4)ccc3-c2cc1	49871	0	3.958	279.265
Oc1c2c(C(=O)C=C(N3CC[NH+](CC3)CCOCCO)C2=O)c(O)cc1	658143	1	-1.229	363.385
OCC[NH+]([C@@H](Cc1ccccc1)c1ccccc1)CCO	32201	0	1.197	286.389
O=C1CCC=2C(=C1)CC[C@H]1[C@@H]3CC[C@@H](OCOC)[C@]3(C=CC1=2)C	106551	0	3.027	314.419
Oc1ccccc1\C=N\N1CCCCCC1	81996	0	2.695	218.295
S=C1NC2=C(N(C)C(=O)N(C)C2=O)N1C	14290	0	0.472	226.256
N(C(N)=N)C#N	2031	0	-0.85	84.08
O=C1c2c(cccc2)/C(=N/C(=O)C)/C=C1NC(=O)C	26697	1	0.627	256.257
O=C1N(C2CCCCC2)C(=O)N1C1CCCCC1	691127	1	3.688	250.337
Oc1cc(NC(=O)CCCCN2C=CC(=O)NC2=O)ccc1C(=O)[O-]	92432	0	-1.23	346.315
Clc1cc(Cl)ccc1CN1[C@@]2(O)[C@]3([C@@H](C(=O)C=C2)C(=O)N(c2ccccc2)C3=O)C(C(OCC)=O)=C1C	722987	1	3.962	541.379
Oc1ccc(N)cc1C[NH+](CC)CC	17568	0	0.051	195.281
Clc1ncnc(N)c1	42134	0	0.717	129.548
S1C(N)=C(C2=C(CCCC2)C1=S)C#N	269621	0	2.833	222.33
O1[C@H]2[C@@H](C[C@@H]3[C@](CCCC3=C)(C2)C)C(=C)C1=O	601353	1	3.365	232.318
Oc1c2c(C(=O)c3c(C2=O)c(NCCCC[NH+](C)C)ccc3NCCCC[NH+](C)C)c(O)cc1	186848	1	0.382	470.604
[NH2+](C[C@H]1[C@H]2CC[C@@H](C1)C2)C[C@H]1[C@@H]2CC[C@H](C1)C2	47607	0	2.282	234.4
S(=O)(=O)(N(C)C)c1cc(NC(=O)COC(=O)\C=C\c2cc(OC)ccc2)ccc1	744253	0	1.89	418.463
Clc1ccc(cc1)-c1c(S(=O)(=O)c2ccccc2)c(oc1C(=O)NC1CCCCC1)OC	677629	1	5.685	473.969
O(\C=C/OC(=O)C)[C@@H]1CCCC1(c1ccccc1)c1ccccc1	699753	1	3.538	322.398
s1c2c(cc1[N+](=O)[O-])C(=O)c1sccc1C2=O	681824	1	2.734	265.265
O(C)c1cc2C3=NCCN(c4c3c(Nc2cc1)c([N+](=O)[O-])cc4)CC[NH+](CC)CC	658356	1	2.349	410.489
O\N=C/c1ccc(cc1)\C=N\O	122436	0	1.483	164.161
O1c2c(ccc(OC(C(=O)N3CCN(CC3)c3ccccc3)(C)C)c2)C(=O)C=C1c1ccccc1	661195	1	4.811	468.544
S=C(Nc1ccccc1)N(C)C	31893	0	3.048	180.27
Ic1cc2c(N=C(Sc3ccc([N+](=O)[O-])cc3[N+](=O)[O-])N(Cc3ccccc3)C2=O)cc1	715716	1	5.763	560.321
O1[C@H](CO)[C@@H](O[C@@H]2O[C@H](C)[C@@H](O)[C@H](O)[C@@H]2O)[C@H](O)[C@H](O[C@@H]2O[C@H](C)[C@@H](O)[C@H](O)[C@@H]2O)[C@@H]1O[C@H]1CC2=CC[C@H]3[C@@H](CC[C@]4([C@H]5[C@H](O[C@]6([NH2+]C[C@H](CC6)C)[C@@H]5C)C[C@H]34)C)[C@]2(CC1)C	407810	1	-0.328	869.067
O=C1N(C)C(n2nc(cc2C)C)=NC(=C1C#N)c1ccccc1	745574	0	2.36	305.334
O(C)c1cc2[nH]c3[C@@H]4[N@H+](CCc3c2cc1)C[C@H]1[C@H](C4)[C@H](C(OC)=O)[C@H](OC)[C@H](O)C1	81464	0	0.687	415.503
Clc1cc(NC(OC/2=Nc3c(cccc3)\C\2=N\N)=O)ccc1	320852	1	3.162	314.726
S1(=O)([O-])=NC(=O)c2c1cccc2	5349	0	0.463	182.177
O(C(=O)c1ccccc1NCCC(OC)=O)C	105619	0	1.449	237.252
O1[C@@H](C)[C@@H](O)[C@@H]([NH2+][C@@H](C#N)COC)C[C@H]1O[C@H]1c2c(C[C@](O)(C1)C(=O)CO)c(O)c1c(C(=O)c3c(cccc3OC)C1=O)c2O	639659	1	-1.108	627.616
O1c2cc(ccc2OC1)[C@@H]1N(C)C(=O)c2cc(OC)c(OC)cc2[C@@H]1C(=O)[O-]	354972	0	0.511	384.359
O1C(=O)[C@H]2[C@@H](CCCC2)C1=O	8622	0	1.32	154.163
ClCC(=O)\C(\C#N)=C\1/Oc2c(N/1)cccc2	719378	1	2.152	234.638
Oc1ncncc1	1575	0	0.348	96.0874
[n+]12c(cccc1)c(c1c3c(cc(cc3)C)ccc1c2)C	93868	1	4.619	258.337
FC(F)(F)c1[nH+]ccc(Nc2cc(ccc2)C(=O)N\N=C\c2ccc(O)cc2O)c1	748262	1	4.381	417.361
O1CC[NH+](CC1)CC[NH2+]CCCN1C2=C(c3c(cc(OC)c(OC)c3)C1=O)C(=O)c1c2cc2OCOc2c1	725666	1	-1.349	523.578
O=C([O-])/C(/CC)=C\1/CCCCC/1	114905	0	1.767	167.225
OC[C@H]([NH3+])C(C)C	322922	0	-0.972	104.171
S(=O)(=O)(N)c1cc2c([nH]c(NC(=O)[N-]\N=C\c3cc(ccc3)C)c2-c2ccccc2)cc1	746581	0	3.823	446.502
O(C)c1nc(nc(c1)-c1c2c([nH]c1)cccc2)-c1c2c([nH]c1)cccc2	712007	1	4.727	340.378
Clc1cc2N3C(Sc2cc1Cl)=NC(SC)=C(C#N)C3=N	748762	0	4.429	341.239
O=C1NC(=O)N=C(N)[C@@]1(CC)C=1CCCCC=1	46094	0	1.798	235.282
S1SCC([NH3+])(C1)C(=O)[O-]	109825	1	-2.524	165.234
o1nc2c(c1C)C(=O)NN=C2c1ccccc1	749504	0	1.526	227.219
ICc1nc2cc(OC)ccc2nc1CI	144173	1	4.259	440.019
O=C1N2[C@@H]3[C@@]4([C@H]5[N@H+](C/C(/[C@@H]([C@@H]3C=C1[C@@H]1[N@@H+]3[C@@H]6[C@@]7([C@H]8N(c9c7cccc9)C(=O)CC=C8[C@@H](C6)\C(\C3)=C/C)C1)C5)=C/C)CC4)c1c2cccc1	715083	1	1.547	636.824
O(C)c1ccc(OC)cc1Cc1cnc2nc(nc(N)c2c1C)N	351521	1	2.428	325.365
O=C1NC(=O)NC(=O)C12CCCC2	85086	0	0.373	182.177
O(C)c1cc(ccc1OC)[C@@H]1NN=C(C1)c1c2c(ccc1O)cccc2	687787	1	3.518	348.395
s1c(C(=O)N\N=C\c2n(ccc2)C)c(nc1NC(=O)C)C	745908	0	0.966	305.356
[Si](O[C@@H]1C[C@H](O[C@@H]1CO[Si](C(C)(C)C)(C)C)N1C=C(F)C(=O)NC1=O)(C(C)(C)C)(C)C	682803	1	5.94	474.714
Clc1cc(ccc1)Cn1cc(c2c1cccc2)C=O	741908	1	4.336	269.726
Clc1ccc(cc1)-c1nc(sc1)Nc1cc(ccc1)-c1nc(sc1)C	730247	1	5.651	383.918
O=C1N(c2ccc(cc2C)-c2cc(C)c(N3C(=O)C4(CC3=O)CCCC4)cc2)C(=O)CC12CCCC2	308835	0	5.481	484.586
Clc1cc2[nH+]c3c(cc(OC)cc3)c(NCCC[NH2+]CCCNc3c4cc(OC)ccc4[nH+]c4c3ccc(Cl)c4)c2cc1	671553	1	6.485	617.588
n1cc(ccc1)CC#N	83226	0	0.593	118.136
FC1=CN([C@H]2O[C@H](COC(=O)\C=C(\C=C\C=C(\C=C\C=3C(CCCC=3C)(C)C)/C)/C)[C@H](OC(=O)\C=C(\C=C\C=C(\C=C\C=3C(CCCC=3C)(C)C)/C)/C)C2)C(=O)NC1=O	669728	1	10.494	811.032
s1cc2c(ncnc2N)c1[C@H]1O[C@H](CO)[C@H](O)[C@H]1O	651010	1	-0.854	283.304
Ic1cc2c(C=3N(CCC[NH3+])C(=O)c4cc([N+](=O)[O-])ccc4C=3C2=O)cc1	736493	1	0.916	476.245
O(C(=O)C(=O)[C@H](C#N)c1ccccc1)CC	31650	0	1.8	217.221
S(=O)(=O)(Nc1ccccc1)C1CCCCC1	29061	0	2.599	239.334
ClN1[C@@H]2NC(=O)N(Cl)[C@@H]2NC1=O	84986	0	-0.227	211.006
O(C)c1ccc(NCc2cnc3nc(nc(N)c3c2C)N)cc1	666783	1	1.862	310.354
BrCc1c(Cl)nc(nc1Cl)C	40594	1	2.498	255.927
S1[C@H](NC(=O)C(C#N)=C1Nc1cc(ccc1)C)c1cc(OC)c(O)cc1	319435	0	3.738	367.422
s1c2c(cc1C)C(=O)c1c(scc1)C2=O	656238	1	2.86	234.294
Clc1ccc(cc1)C=1Nc2nccc(c2C(=O)C=1)C	679030	1	3.5	270.714
ClC[C@H]1c2c3c(cccc3)c(NC(=O)[C@@H](Nc3c([N+](=O)[O-])cc(cc3[N+](=O)[O-])C(=O)NCC[NH+](C)C)C)cc2N(C1)C(=O)c1[nH]c2c(cc(OC)c(OC)c2OC)c1	695590	1	3.147	818.251
O=C1NC(=Nc2c1cc(cc2)C)/C(=C(\NCCC(=O)[O-])/CCCO)/C#N	744196	0	-0.704	355.368
Ic1cc(ccc1O)C[C@H]1N(C)C(=O)CNC(=O)[C@H](C\C(=C/[C@@H](C[C@@H](OC(=O)[C@@H](NC1=O)C)C)C)\C)C	682309	1	3.44	627.512
O=C1N(N=C(C1)c1ccccc1)c1ccccc1	59778	0	2.797	236.269
S1C(=NNC1=S)NC(=O)C	97893	0	1.217	175.232
O(C)c1cc2CC(=O)Nc2cc1OC	10127	0	0.786	193.199
O=C(\C=C\c1ccc(N(CC)CC)cc1)c1ccc(Nc2nc(nc(n2)Nc2ccccc2)Nc2ccccc2)cc1	743533	1	8.89	555.672
Fc1cc2[n+]([O-])c(C(=O)NCCc3ccc(OC)cc3)c([n+]([O-])c2cc1)C	744578	0	1.618	371.362
[NH2+](Cc1cc(cc(c1)C[NH2+]CCCCc1ccccc1)C[NH2+]CCCCc1ccccc1)CCCCc1ccccc1	704565	1	5.202	564.866
O(C)c1cc(ccc1OC)[C@H]1N(N=C/2[C@@H]1C[C@H](C\C\2=C/c1cc(OC)c(OC)cc1)C)c1ccccc1	737023	1	6.819	498.613
Clc1nc(Cl)nc(Cl)c1-c1ccccc1	66915	1	4.172	259.519
O(C)c1cc(NCCCCCC[NH3+])c2ncccc2c1OC	13822	0	1.513	304.407
O[C@@H]1[C@@H]2[C@H](CC([NH2+][C@@H]2CCO)(C)C)CC1	54839	0	-0.971	214.324
O1CCC[C@H]1N1C=C(C)C(=NC1=O)NC	109136	0	0.172	209.245
O[C@@H]1CC[C@]2([C@@H](CC=C3C2=CC[C@]2([C@@H]4C[C@@](CC[C@@]4(CC[C@@]23C)C)(CO)C)C)C1(C)C)C	705536	1	5.962	440.701
s1c2cc(OCC)ccc2nc1N	28731	0	2.041	194.253
O(C(=O)CCCC)C[n+]1cc2c(cc1)c(c1[nH]c3c(c1c2C)cccc3)C	637130	1	6.209	361.457
O(CCC#N)CC[NH+]1CCN(CC1)c1ccc(cc1)C	85343	0	0.722	274.381
O[C@@H]([C@@H](O)c1ncccc1)c1ncccc1	16409	0	0.669	216.236
O(C(=O)C)C1=CC=2Cc3c(C=2N(Cc2ccc(OC)cc2)C1=O)cccc3	705301	1	2.774	361.391
O1CC[N@@H+](C)[C@H]1c1ccc(cc1)[C@@H]1OCC[N@H+]1C	81918	0	-1.37	250.337
Oc1ccccc1C(=O)NNC(=O)C=1CC(C(=O)NNC(=O)c2ccccc2O)=C(NC=1C)C	658247	1	0.476	465.459
O(C)c1ccc(cc1)CCc1nc2c(cc1)cccc2	10633	0	4.437	263.334
O(C(=O)c1n(cc(NC(=O)Nc2cc(n(c2)C)C(OC)=O)c1)C)C	742397	0	1.415	334.327
Clc1ccc(nc1)NC(=O)C1(CCCCC1)c1ccccc1	742361	0	4.578	314.809
O=C1N(CC(=O)NC2(CCCC2)C(=O)NC2(CCCC2)C(OCC)=O)C(=O)c2c1cccc2	78866	0	1.981	455.504
o1cccc1C\C(=N\O)\C(=O)[O-]	43551	0	-0.641	168.127
O=C1c2c(cccc2)\C(=N/c2cc3c(cc2)cccc3)\[C@@]1(C=1c2c(cccc2)\C(=N/c2cc3c(cc2)cccc3)\C=1c1ccccc1)c1ccccc1	686481	1	11.24	676.802
s1c2c(cc1C1([NH+]3CCCCC3)CCC([NH3+])CC1)cccc2	708105	1	1.596	316.504
O1[C@H](COC(=O)C)[C@@H](O)[C@@H](O)[C@@H](O)[C@H]1O[C@@H]1C[C@@H]2[C@@]([C@H]3CC[C@@]45[C@@](CC[C@H]4[C@H](C[C@@H](O)[C@@H](O)C(OC)(C)C)C)(C5)[C@]13C)(CC[C@H](OC(=O)C)C2(C)C)C	642296	1	2.836	752.971
Clc1nc(Cl)nc2ncn(c12)Cc1ccc(cc1)CCl	733895	1	3.881	327.596
O=C1NC(=O)NC(=C1)C1CCCCC1	105815	0	1.342	194.23
S1c2c(cccc2)C(=O)N=C1N	104627	0	1.824	178.211
Oc1c(cc(cc1C(C)(C)C)C(C)(C)c1ccccc1)Cc1cc(cc(C(C)(C)C)c1O)C(C)(C)c1ccccc1	288938	0	10.986	548.797
O(C)c1cc(ccc1O)\C=C/1\CN(C)C(=O)C\1=O	152104	0	1.043	247.247
Clc1cc(ccc1Cl)\C=C\1/CCC\C(=C\c2ccc(O)cc2)\C/1=O	683835	1	6.224	359.246
S=C1NC[C@@H](C)C(=O)N1c1ccccc1	121902	0	2.426	220.291
s1c2N=C(NC(=O)c2c(C)c1C)COC(=O)C=1Oc2c(cccc2)C(=O)C=1	744248	0	2.406	382.39
O=C/1Nc2c(cc(cc2)C)\C\1=N\Nc1ccccc1[N+](=O)[O-]	117915	1	2.91	296.281
O1[C@H](COC(=O)C)[C@@H](O)[C@@H](O)[C@@H](O)[C@H]1O[C@@H]1C[C@@H]2[C@@]([C@H]3CC[C@@]45[C@@](CC[C@H]4[C@H](C[C@@H](O)[C@@H](O)C(C)=C)C)(C5)[C@]13C)(CC[C@H](OC(=O)C)C2(C)C)C	642302	1	3.448	720.93
S=C1NC(=O)[C@@](C)(C=2CCCCC=2)C(=O)N1C	120812	0	2.392	252.333
OC[C@@H]([NH3+])Cc1nc[nH]c1	74518	0	-2.23	142.179
O1[C@@H](N2C=CC(=NC2=O)N)CC=C1CO	742560	0	-1.055	209.202
FC(F)(F)C=1O[C@@H]2O[C@@]3(OO[C@]24[C@@H](CC[C@H]([C@@H]4CC3)C)C=1COCC=1[C@H]2[C@@]34OO[C@@](O[C@H]3OC=1C(F)(F)F)(CC[C@H]4[C@@H](CC2)C)C)C	724778	1	4.965	682.645
O1[C@@H](N\C(=C\c2ccccc2)\C1=O)C	280435	0	1.367	189.211
Clc1cc(Cl)c(OC(=O)N(C)C)cc1C	30533	0	3.614	248.106
O=C1N(CC(=O)n2nc(cc2C)C)C(=Nc2c1cccc2)CCC	748352	0	2.536	324.377
O(C(=O)CC[NH+]1CC1)CCCCCCCCCC	101295	0	2.599	256.404
O=C1NC(=CC(=C1)c1ccccc1)C	114085	0	1.668	185.222
N(c1cc2c(cc1)cccc2)c1ccccc1	37151	0	4.288	219.281
S(Cc1ccc([N+](=O)[O-])cc1)c1ncnc(N)c1	40199	0	2.402	262.288
S=C(NCc1occc1)NCc1occc1	45028	0	2.188	236.29
O1C=2c3c(C(=O)C(=O)C=2C)c(ccc3C(=C1)C)C	113136	1	2.503	240.254
O(Cc1ccccc1)c1nc(OC)nc(N)c1N=O	662155	1	2.7	260.249
ClCCNC1=C2C[C@H](C[C@@H](OC)[C@@H](O)[C@H](\C=C(\C)/[C@H](OC(=O)N)[C@@H](OC)/C=C\C=C(/C)\C(=O)NC(=CC1=O)C2=O)C)C	320877	1	2.572	608.123
O(CC[NH+](CC)CC)c1ccc(cc1OC)\C=C\1/C[C@H]2[C@@H]3[C@H](CC[C@]2(C)[C@H]/1O)[C@@]1(C(C[C@@H](O)CC1)=CC3)C	730474	1	4.105	524.754
Brc1cc(N)cc(Br)c1-c1c(cc(N)cc1C)C	43227	1	4.324	370.082
Clc1ccc(NC(=S)[N-]\N=C\c2nc(ccc2)C)cc1	670964	1	4.802	303.79
O=C1N(OC(=O)CCCC(=O)Nc2ccc(cc2)C[N+](C)(C)c2ccccc2)C(=O)CC1	651744	1	0.795	438.496
S1[C@@H]2[N@@H+]3[C@H](C1(C)C)C(O[C@@H]3CC2)=O	746987	0	-0.222	200.278
S(=O)(=O)(Nc1nc(cc(n1)C)C)c1ccc(NC=2NC(=O)c3c(nc(nc3-c3ccc(O)cc3O)Nc3cc(O)ccc3)N=2)cc1	745482	0	4.249	639.641
S(Oc1ccc([N+](=O)[O-])cc1[N+](=O)[O-])(=O)(=O)c1ccc(cc1)C	25830	1	3.239	338.293
O=C\1C[C@@H]2[C@H](CC2(C)C)C(CC\C=C/1\C)=C	314035	0	3.751	218.335
BrCCN(P(OCc1c2c(n(c1)C)C(=O)C=C(OC)C2=O)(=O)N(CCBr)C)C	718631	1	1.548	541.171
S(=O)(=O)([O-])c1cc(ccc1)\C=N\NC(=O)c1ccncc1	87609	0	-1.38	304.301
S=C(N)[N-]\N=C\c1nccc2c1cccc2N	205105	1	1.731	244.296
Brc1cc(Br)cc(N)c1-c1c(cc(cc1N)C)C	43226	1	4.324	370.082
S(=O)(Cc1ccc([N+](=O)[O-])cc1)c1c2cc(OC)ccc2nc2c1cc(OC)cc2	699936	1	4.228	422.454
O(C)c1c(OC)cc(cc1OC)C(=O)N1N=C(C[C@H]1c1cc(O)c(OC)cc1)c1ccccc1	745487	1	4.108	462.494
O(C(=O)N[C@@H]1[C@H]2[C@@H]3[C@H]([C@@H](C1)C=C2)C=C3)C	167986	0	1.317	205.253
O=C1c2c(cccc2)C(=O)c2[n+](C)c(n(c12)C(C)C)\C=C\c1ccccc1	80469	1	5.177	357.425
Brc1cc2SS(=O)Nc2cc1	619837	1	2.228	250.136
Clc1cc(SSc2cc(Cl)c(cc2S(=O)(=O)n2ccnc2Oc2cc(Cl)ccc2)C)c(S(=O)(=O)n2ccnc2Oc2cc(Cl)ccc2)cc1C	696906	1	10.861	828.612
S1c2c(C(=O)c3c1cccc3)c(NCC[NH+](C)C)ccc2[N+](=O)[O-]	46085	1	1.803	344.408
OCC[NH+]1CCCC1	26883	0	-1.319	116.181
O1[C@H]2[C@H]3[N+]([C@H]([C@@H]12)CC(OC(=O)[C@H](COC(=O)CCC1CCCC1)c1ccccc1)C3)(C)C	10717	0	2.22	442.568
BrC1=NC(=O)C=2NC(=O)NC=2N1	62626	0	-0.396	231.007
O=C1CCCc2c1cc(C)c(c2)C	210256	0	3.323	174.239
s1c2c(nc1-c1occc1)cccc2	33157	0	3.234	201.244
O=C(N\N=C/1\C[C@@H](CC=C\1C)C(C)=C)c1ccncc1	58583	0	2.444	269.342
O1[C@@H]2[N@H+]3[C@@H](c4c(C[C@@H]3[C@H]3[N@@H+]([C@@H]2C[C@@H]3C(=O)[O-])C)cccc4OC)C1	601422	1	-2.894	331.386
s1nnc(C(OCC)=O)c1-c1ccc(cc1)-c1snnc1C(OCC)=O	120289	0	3.804	390.437
O(C(=O)\C=C\c1ccccc1)c1ccc(cc1)\C=C\1/CCC[C@H](C[NH+](C)C)C/1=O	697443	1	3.614	390.495
s1cc(nc1NC(=O)COc1cc(ccc1)\C=C\1/CSc2c(cccc2)C/1=O)C(OCC)=O	744072	1	4.207	480.556
O1O[C@](C[C@H](CC)[C@@H]1CC(=O)[O-])(CC)C\C=C\[C@H](\C=C\CC)CC	719626	1	3.603	337.474
O=[N+]([O-])c1ccccc1N\N=C(/[C@H](C#N)C)\C	749501	0	2.171	232.239
S=C1NC[C@@H](C)C(=O)N1c1ccc(F)cc1	121909	0	2.632	238.281
Clc1ccc(cc1)C(=O)COc1ccc(cc1)\C=C\1/Oc2c(cccc2)C/1=O	743499	0	5.04	390.816
O=C([O-])[C@@H](O\N=C(\C)/C)CC	78396	0	-0.983	158.175
S(CC(C)C)c1nc(nc2nc[nH]c12)N	38306	0	1.809	223.298
S=C1NC(C)=C(C(=O)N2CCC[C@H]2C(OC)=O)[C@H](N1)c1cc(OC)c(OC)c(OC)c1	748860	0	2.166	449.521
[NH+]1(CCN(CC1)c1ccccc1)CC	86989	0	0.737	191.293
O=C1NC(C)=C([N+](=O)[O-])C(C(OCC)=O)=C1C#N	13137	0	-0.065	251.196
O1C2=CC(=O)c3c(C2=Nc2cc(ccc12)CC[NH3+])cccc3	620055	1	1.451	291.324
O=C(N[C@@H](CCC(=O)[O-])C(=O)[O-])c1ccc(N(Cc2nc3c(nc(nc3N)N)nc2)C)cc1	740	1	-2.834	452.423
N(C)(C)c1ccc(cc1)C(c1ccc(N(C)C)cc1)c1ccc(N(C)C)cc1	7338	0	5.575	373.534
O1[C@@H]2C[C@@H](O)[C@@]3([C@H]([C@H](OC(=O)c4ccccc4)[C@]4(O)C[C@@H](O)C(=C([C@H](O)C3=O)C4(C)C)C)[C@]2(OC(=O)C)C1)C	251677	1	0.364	544.59
S=C(N1CCOCC1)CCC(C)(C)c1ccccc1	55314	0	3.76	277.425
O=C(c1ccc([N+](=O)[O-])cc1)c1ncccc1	153606	0	2.406	228.204
O=C(Nc1ccccc1)c1cc(nc2c1cccc2)-c1cccnc1	748018	0	3.597	325.363
O(CCCCCOc1cc2N=C[C@H]3N(CCC3)C(=O)c2cc1OC)c1cc2NC(=O)[C@H]3N(CCC3)C(=O)c2cc1OC	718813	1	2.849	576.64
O=C1N(CO)C(=O)C=C1	19627	0	-0.746	127.098
[Ir+]12(P(C)(C)=[CH2])(P(C)(C)=[CH2])(P(C)(C)=[CH2])C=3CC[C@@-]1[C@H](CCC2=3)Cc1ccccc1	625570	1	1.626	613.713
Clc1ccc(S(=O)(=O)N(CC(=O)NNC(=O)c2n(cnc2)-c2ccc(F)cc2)C)cc1	745823	0	1.671	465.886
O=C(NN)c1ccncc1	9659	0	-0.811	137.139
O(C)c1c(OC)cc(cc1OC)C(=O)c1n(cnc1N)-c1ccc(OC)cc1	747338	0	2.922	383.398
Brc1cc(F)c(cc1)C(=O)N[C@H]1[C@@H]2[Se]N([Se][C@@H]2[C@@H](NC(=O)c2ccc(Br)cc2F)C(=O)CC=2OC(CC1=O)=CC(O)(C=2)C)C(=O)C	746148	0	3.464	895.26
O(CC[NH+](CC)CC)c1ccc(cc1)C=1c2c(cc(OC)cc2)CCC=1c1ccccc1	70732	1	5.098	428.586
O1c2c(C[C@@]13[C@]1([C@H](CC[C@@H]3C)[C@@]3([C@@H](CC1)C(C)(C)[C@@H](OC(=O)C)CC3)C)C)c(OC(=O)C)c(OC(=O)C)cc2C	626775	1	6.315	554.714
s1c2c(c(c1)C)C(=O)c1c(scc1)C2=O	656244	1	3.201	234.294
O1c2c(cc3OCOc3c2)[C@@H]([C@@H](C)[C@H]1Nc1ccccc1)c1cccc(OC)c1OC	667903	1	5.21	419.47
S=C1NC[NH+](CN1)C	246414	0	-0.982	132.207
O(CCCCCC)C(=O)N1CCCC[C@H]1CCC	88543	0	4.738	255.396
S1(=O)(=O)N(CCC[NH+]2CCN(CC2)c2cc(ccc2)C(F)(F)F)C(C(=O)c2ccccc2)=C([O-])c2c1nc(cc2C)C	713759	1	2.398	600.652
Clc1cc2c(nnc3c4cccnc4[nH]c23)cc1	747649	0	3.183	254.674
O1c2c(cc3OCOc3c2)[C@@H]([C@@H](C)[C@H]1Nc1ccc(OC)cc1)c1cc(OC)c(OC)c(OC)c1	667931	1	5.177	479.522
BrC1=CC2(C3=C(NCC2)C(=O)c2sc(cc2C3=O)COC)C=C(Br)C1=O	656211	1	2.21	499.173
[Cu+2]12(OC3=C([C@H](N1c1ccccc1OC)c1ccccc1)C(=O)c1c3cccc1)OC1=C([C@H](N2c2ccccc2OC)c2ccccc2)C(=O)c2c1cccc2	639084	1	9.249	774.318
O1c2c(C(=O)C(OC)=C1c1cc(OC)c(O)cc1)c(O)cc(O)c2OC	618932	1	2.065	360.315
ClC(Cl)C(=O)Nc1cc(c2OCOc2c1)C	47122	0	2.399	262.089
S1C[C@H](N(CO)C1=O)[C@@]1(O[C@@H]2CC[C@@H](\C=C/C=C/CC\C(=C/C(O[C@@H](C1)C2)=O)\C)C)O	749377	1	3.759	451.576
Clc1cc(N2CC[NH+](CC2)C[C@H](O)COc2ccc(Cl)cc2)ccc1	91340	0	2.839	382.304
P(O[C@@H]1CC2=CC[C@H]3[C@@H]4CC[C@@H]([C@@H](CC[C@H](C(C)C)CC)C)[C@]4(CC[C@@H]3[C@]2(CC1)C)C)(=O)(N1CC1)N1CC1	273413	0	7.218	544.792
O[C@@H]1Cc2c(NC1)c1c(cc2)cccc1	13233	0	2.111	199.248
s1c(nnc1SCC(=O)N1CCC(CC1)C)Nc1cc(ccc1)C	744247	0	3.858	362.513
FC(F)(F)c1[nH+]ccc(Nc2ccccc2C(=O)N\N=C\c2cccc(OC)c2O)c1	748670	1	4.607	431.388
O1CC(COC12[C@@H](CC=C2O)C)(C)C	46273	0	1.546	198.259
n1cc2[C@H]3C[C@@H]([C@H](c2cc1-c1ncccc1)Cc1cc(ccc1)C[C@@H]1[C@@H]2C[C@H](c4c1cc(nc4)-c1ncccc1)C2(C)C)C3(C)C	690441	1	8.752	602.81
Clc1sc(cc1)C(=O)\C=C\c1sc(Cl)cc1	54860	0	4.526	289.201
O(C)c1cc(ccc1O)\C=N\C1CCCCC1	126249	0	3.449	233.306
O=C1CC[C@]2(C(=C1)CCCC2)C	42886	0	2.736	164.244
O1[C@H]2C[C@H]3CC[C@@](O)([C@@H](CC[C@@]4(O[C@@H]4CC[C@]12CO)C)C3(C)C)C	749322	0	2.203	338.482
OC1C(C)(C)C(O)C1(C)C	46473	0	0.806	144.211
O(Cc1ccccc1)C(=O)NC1(CCCC1)C(=O)NCC(=O)[O-]	78859	0	0.139	319.332
O=C([O-])Cc1ccc([N+](=O)[O-])cc1	5398	0	-0.085	180.138
Cl\C(=N/OC(=O)Nc1ccccc1OC(F)(F)F)\CC	682836	1	4.621	310.657
[NH2+]=C(N)[N-]\N=C(\C1CC1)/c1ccc(cc1)C	74314	0	2.088	216.282
O1Cc2c(c(c3c(c2)cc2OCOc2c3)-c2cc3OCOc3cc2)C1=O	627695	1	3.401	348.306
O1CC[NH+](CC1)Cc1cc2[C@@H]3[C@H]([C@@H]4CCC(=O)[C@]4(CC3)C)CCc2cc1O	36869	0	2.139	370.505
O(C)C1=C[C@H]2[C@@]3(CC1=O)c1c(C[C@@H]2[N@@H+](CC3)C)ccc(OC)c1O	76021	0	0.113	330.398
O[C@H](Cc1ccccc1)C[NH2+]CC[NH+]1CC[NH2+]CC1	41527	0	-3.284	266.402
O1[C@H]([C@H]([C@H](O)[C@H](C)[C@@]2(O[C@@H](\C=C\C)[C@H](C)[C@H](O[C@H]3O[C@H](C)[C@H](OC(=O)N)[C@H](O)C3)C2)O)C)[C@@H](OC)\C=C\C=C(\C[C@@H](C)[C@@H](O)[C@H](C)[C@H](O)[C@@H](\C=C(\C=C(/OC)\C1=O)/C)C)/C	670977	1	4.84	852.059
S(=O)(=O)([O-])c1cc(N(C)C)ccc1	16160	0	-0.92	200.235
O=C(N1c2c(C=C[C@H]1C#N)c1c(cc2)cccc1)c1ccccc1	96541	1	3.816	310.349
Clc1ccc(cc1)[C@H]1Oc2c(C=C1[N+](=O)[O-])cccc2OC	667224	1	4.037	317.724
ClC1=C(N[C@H](C(=O)Nc2ccc([N+](=O)[O-])cc2)C)C(=O)c2c(C1=O)c(O)ccc2O	662380	1	1.892	431.783
ClC(Cl)(Cl)C1(C=C\C(=N\O)\C=C1)C	11459	0	2.839	240.514
Clc1ccc(cc1C(=O)Nc1ccc(cc1)C1=[NH+]CCN1)C(=O)Nc1ccc(cc1)C1=[NH+]CCN1	67436	0	2.431	488.969
Clc1cnc(Oc2cc(NC(=O)NC(=O)c3ccccc3[N+](=O)[O-])ccc2CC)nc1	624546	1	4.198	441.825
s1cccc1\C=N\Nc1nc(SCC)nc2n(ncc12)CO	724130	1	3.065	334.42
FC(F)(F)c1cc(ccc1)-c1c(nc(nc1N)N)Cc1cc(ccc1)C(F)(F)F	71669	1	5.002	412.332
P(c1ccccc1OC)(c1ccccc1OC)c1ccccc1OC	93545	0	5.657	352.363
Br[C@]12Nc3c(cc(OC)cc3)C(=O)[C@@H]1NC(=O)NC2=O	66695	0	0.899	340.129
S(=O)(=O)([O-])c1c2c(cccc2O)ccc1	8626	0	-0.416	223.225
O=[N+]([O-])c1c2c([n+]([O-])nc1)cccc2	294846	1	0.599	191.144
O(C)c1cc(O)c2c(c1O)C(=O)c1c(cnc(c1)C)C2=O	103645	0	1.44	285.252
Oc1ccccc1C	23076	0	2.074	108.138
O1[C@H]2Oc3c(cc(cc3)C)[C@]1(C)C(=O)C=C2	359892	1	2.518	216.233
c1ccccc1/C(=C/c1ccccc1)/C	70	0	4.262	194.272
[Sn]1(O[C@@H](S(O1)(=O)=O)c1ncccc1)(CCCC)CCCC	633501	1	4.212	420.112
O(Cc1ccccc1)c1ccc([N+](=O)[O-])cc1N	99757	0	2.544	244.246
O=C1C=C2[C@H]([C@@H]3CC[C@H]([C@@H](CCC(OC)=O)C)[C@@]13C)CC[C@@H]1C[C@H](O)CC[C@@]12C	81576	0	4.579	402.567
ClC=1N[C@H](O)C(C)(C)C(C#N)(C#N)C=1C#N	742279	0	0.667	236.658
O=C1NC[NH+](CN1)C1CCCCC1	85487	0	-0.411	184.259
O=C(NCc1ccccc1)Cn1ccnc1[N+](=O)[O-]	299972	0	1.002	260.249
Clc1cc2N3C(Sc2cc1Cl)=NC(C(C#N)C#N)=C(C#N)C3=N	748768	0	3.204	359.193
n1ccccc1C(Cc1ccccc1)Cc1ccccc1	42710	0	5.068	273.372
ClC(Cl)(Cl)c1nc(sn1)OCC	524929	0	2.666	247.53
ClP1(Cl)=NP(Cl)(Cl)=NP(Cl)(Cl)=N1	209799	0	1.908	347.659
Oc1ccccc1\C=N\C[C@@H](\N=C\c1ccccc1O)C	67004	0	3.411	282.337
O=C1c2c(C[C@@H]1Cc1cc(ccc1C(OC)=O)C)c(ccc2)C	677815	1	4.673	308.371
O=C1c2n3c(nc2C(=O)C(N2CC2)=C1C)[C@@H](O)CC3	651078	1	0.212	259.261
S1CC(=O)N(\N=C\c2ccc(OCc3ccccc3)cc2)C1=S	124812	0	4.362	342.435
Brc1ccc(OCCCC)cc1	406732	0	3.89	229.114
O1C[C@H]2[C@@H]([C@@H](c3c(cc4OCOc4c3)[C@H]2[NH2+]Cc2ccccc2)c2cc(OC)c(O)c(OC)c2)C1=O	642279	1	2.381	490.524
[Co+2]1234(O[C-](N[N@H+]1[CH-]c1c(O2)c(Cl)cc(Cl)c1)c1ccccc1O)O[C-](N[N@H+]3[CH-]c1c(O4)c(Cl)cc(Cl)c1)c1ccccc1O	617577	1	5.814	709.227
[Sn]1(SCCO1)(CCCC)CCCC	512569	1	4.161	309.056
ClCC[NH+](CCCCCCNc1c2cc(OC)ccc2[nH+]c2c1cccc2)CCCl	629266	1	4.883	450.444
O(Cc1ccccc1)C(=O)NCCOC(=O)Nc1c2c(ccc1)cccc2	43162	0	3.921	364.394
O(C)c1cc([nH]c1\C=C\1/N=CC=C/1)-c1[nH]ccc1	742419	1	2.692	239.273
s1cccc1C(=O)N\N=C\c1cc2CCNc2cc1	127930	0	2.52	271.338
O(C(=O)\C=C(\Nc1ccc(cc1)Cc1ccc(N\C(=C\C(OC)=O)\C)cc1)/C)C	109457	0	4.16	394.464
n1(\C=C\n2c(ccc2C)C)c(ccc1C)C	746995	0	2.062	214.306
S(=O)(=O)(Nc1c(cc([N+](=O)[O-])cc1C)C)c1ccc(cc1)C	97147	0	3.67	320.364
Clc1ccc(N2CC[NH+](CC2)C[C@H](O)COc2ccccc2)cc1	91348	0	2.174	347.859
O(CC)C(=O)N1c2c(N(C(OCC)=O)C1CC(=O)\C=C\c1ccccc1)cccc2	710445	1	4.447	408.447
S=C(N[C@@H]1[C@@H]2CC[C@](C)(C1=O)C2(C)C)[N-]N	36425	0	2.094	240.345
s1c2N=C3N(N=C(NCCC[NH+](C)C)c4c3cccc4)C(=O)c2c(C)c1C	749169	1	1.022	382.502
o1c2c(cc(O)c3ncccc23)c(C)c1\C=N\N(C)C	651003	1	2.589	269.298
Cl\C(=C(\C[NH+](C)C)/c1cc(OC)c(OC)cc1)\c1cc(OC)c(OC)cc1	618113	1	2.592	392.896
S1C(=NC(=NC1=S)N)N	8148	0	1.553	160.221
FC(F)(F)C(=O)CC(=O)c1cc2c(cc1)cccc2	42790	0	3.477	266.215
O(C)c1ccccc1\C=C\C(=O)c1ccccc1	636918	1	3.685	238.281
O1[C@H](\C=C(\CC\C=C(\C)/C)/C)[C@]2(CC1=O)C[C@H](O)C=CC2=O	730563	1	3.06	304.381
O1c2c(cc3OCOc3c2)[C@@H]([C@@H](C)[C@H]1NN)c1cc(OC)c(O)c(OC)c1	671174	1	2.344	374.388
[As](=O)([O-])([O-])c1cccnc1	31741	0	-1.854	201.012
ClC[C@@H]1c2c(N(C1)C(=O)c1[nH]c3c(c1)cc(OC)cc3OCC[NH+](C)C)cc(N)cc2	700643	1	1.582	443.946
ClC(Cl)C(=O)Nc1cc(cc([N+](=O)[O-])c1)C(=O)[O-]	15320	0	0.195	292.052
O=C(NCCC[C@H](NC(=O)c1ccc(NCc2cnc3nc(nc(N)c3c2C)N)cc1)C(=O)[O-])c1ccccc1C(=O)[O-]	695788	1	-1.116	584.583
O(CC[NH+](CCNC(=O)c1c2[nH+]c3c(cccc3C)c(N)c2ccc1)CCOC)C	694452	1	0.892	412.525
O=C1NC=C2C(=N1)c1c(CC2)cn(C)c1C	748052	0	1.451	215.251
Cl[C@H]1CCCC[C@@H]1Cl	97192	0	2.942	153.05
O=C1c2c(cccc2)C(=O)C=C1C	4170	1	2.204	172.18
[N+](Cc1c(cc(cc1C)C)C)(C)(C)C	27	0	2.007	192.32
S1S\C(=N/C(=S)N(C)C)\N(Cc2cc(OC)c(OC)c(OC)c2)C1=S	645621	1	5.665	417.59
O1[C@H](C[C@H]2[C@]1(C[C@H]1[C@H](CCC(=C1)C)C2(C)C)C)[C@]1(OO[C@H](CC1)[C@H](C(=O)[O-])C)C	625517	1	2.711	405.548
S(=O)(=O)(c1[nH]cc(/C(/[N+](=O)[O-])=C\C2CCCCC2)c1C1CCCCC1)c1ccc(cc1)C	688531	1	7.229	456.598
ClC[C@H]1c2c3c(cccc3)c(NC(=O)C(C)(C)c3ccccc3[N+](=O)[O-])cc2N(C1)C(=O)c1[nH]c2c(cc(OC)c(OC)c2OC)c1	697535	1	6.236	657.112
S(S(=O)(=O)[O-])CC[NH2+]CCCCCC1CCCCC1	89074	1	0.25	309.488
O=C1C2=C(N(CCCC[NH3+])C(=O)c3c2cccc3)c2c1cccc2	726769	1	1.024	319.377
S=C1N(CCN1C(=O)c1occc1)C(=O)c1occc1	703467	1	2.186	290.294
Clc1ccc(cc1)[C@H]1N(N=C(C1)c1ccc(Nc2nc(nc(n2)Nc2ccc(Cl)cc2)Nc2ccc(Cl)cc2)cc1)C(=O)C	743569	0	9.074	643.953
O(C(=O)C(CCCCC)(CC)C(OCC)=O)CC	10823	0	3.915	258.354
O(CC)C(=O)N1N([C@@H]2C=C[C@H]1C2)C(OCC)=O	44163	0	1.163	240.256
Oc1ccccc1CNc1nc(nc2n(cnc12)C(C)C)N[C@H](CC)CO	736738	1	3.078	370.449
O=C([O-])[C@]1(CC[C@@H](C(=O)[O-])C1(C)C)C	824	0	-1.423	198.216
BrC1=C\C(=N\c2cc(C(C)C)c(O)cc2C)\C=C(Br)C1=O	11229	1	4.868	413.104
Clc1cc2cc(O)ccc2cc1	112383	0	3.16	178.615
[Pt+2]1(Cl)(Cl)NC[Si](CN1)(CC)C	625299	1	2.416	396.248
O=C1c2c3n(nnc3ccc2NCC[NH+](CC)CC)-c2c1cc(cc2)C	645824	1	2.362	350.437
O(CC(OCC)=O)c1c(cccc1C)C	11352	0	2.841	208.254
Clc1ccc(NC[C@H]2CC\C(=C\c3ccccc3OC)\C2=O)cc1	639540	1	4.786	341.831
S=C1NC(=O)C(/C(=C/C)/CC)(CC)C(=O)N1	120859	0	2.557	240.322
O(C(=O)c1cccnc1)C(C)C	6860	0	1.261	165.189
O=C1[C@H]2[N@H+]([C@@H](C=C1)[C@H](C(=O)[O-])[C@@H]2C(=O)[O-])Cc1ccccc1	360215	1	-3.392	300.286
O[C@H]1[C@H]2CC[C@@H](C1)[C@H]2C(=O)[O-]	167474	0	-1.046	155.171
S=C1N=C(Nc2n(cnc12)[C@@H]1O[C@H](CO)[C@@H](O)[C@H]1O)N	29422	1	-1.481	299.306
O=C1N(C=Nc2n(ncc12)C)C	1437	0	-0.27	164.165
O1CC[NH+](CC1)CC#CC[NH+]1CCOCC1	25537	0	-2.697	226.315
ClC=1[C@@]2(Cl)[C@H]3[C@H]([C@H]4[C@H]5[C@@H]([C@@H]3C=C4)C(=O)C=CC5=O)[C@@](Cl)(C=1Cl)C2(Cl)Cl	677237	1	3.739	458.978
ClCC(=O)N[C@@H]1C2=CC(=O)C(OC)=CC=C2c2c(cc(OC)c(OC)c2OC)CC1	164850	1	2.576	433.882
O=C1N(c2c(cccc2)C([O-])=C1)C	39973	0	0.217	174.176
S1S[C@@]23N([C@H]4C[C@]5(O[C@@H](C)C(C)(C)C5=O)[C@@H](OC(=O)C)[C@@]4(O)C2)C(=O)[C@]1(N(C)C3=O)CO	294408	1	-0.264	486.559
Clc1ccc(cc1)C([NH+]1CC[NH2+]CC1)c1ccc(Cl)cc1	142496	1	1.474	323.26
[n+]1(ccn(CCCCCCCCCCCCCCCC)c1C)Cc1ccccc1	717205	1	9.144	397.66
[NH+]1(CCN(CC1)c1ccccc1C)CCC#N	87117	0	0.853	230.329
Oc1cc(ccc1O)\C=C\1/CCC\C(=C/c2cc(O)c(O)cc2)\C/1=O	652890	1	4.169	338.354
S(=O)(=O)(N\N=C(/C)\c1ccc(cc1C)C)c1ccc(NC(=O)C)cc1	22667	0	2.459	359.443
[Sn+4]1(O[C@-](C)[CH-][C@-](O1)C)([C@H]1C=CC=C[CH-]1)([C@H]1C=CC=C[CH-]1)[C@H]1C=CC=C[CH-]1	644913	1	6.586	452.153
Clc1cc2Cc3cc(N)ccc3-c2cc1Cl	80141	1	4.075	250.123
O1C(=O)C(Cc2c(c(cc(c2)C)C)C1=O)(C)C	379413	0	3.646	232.275
S(CC[NH+](C)C)c1cc(ccc1)-c1nc(SCC[NH+](C)C)nc(c1)-c1cc(SCC[NH+](C)C)ccc1	619007	1	1.825	544.862
O1C2=C(C=C(C3=Cc4c(OC3=O)cc(N(C)C)cc4)C1=O)[C@H](Oc1c2cccc1)O	742950	1	3.1	403.384
Fc1cc2[n+]([O-])c(C3=NN[C@H](C3)c3cc(OC)c(OC)c(OC)c3)c([n+]([O-])c2cc1)C	744575	0	1.528	428.414
O=C1NC(=O)[C@H](C#N)C(C)([C@H]1C#N)c1ccccc1	39836	0	0.864	253.256
O=C1NC=C(C=C1)[C@@H]1[N@@H+](CCC1)C	68657	0	-1.362	179.239
Oc1c2c(C(=O)c3c(cccc3)C2=N)c(NCC[NH2+]CCO)cc1	649153	1	0.262	326.37
[nH]1c2c(nc1N\N=C(/C)\c1nccnc1)cccc2	703101	1	1.613	252.275
O1CCN(CC1)c1cc2c(NC(=O)[C@@H](NC2=O)Cc2ccccc2)cc1NC(=O)C[NH+]1CCN(CC1)C(OCC)=O	747175	0	-0.491	565.641
S(=O)(=O)([O-])c1cc(O)c(N=N[C@@H]2C(=NN(C2=O)c2ccccc2)C)c2c1cccc2	47717	0	1.206	423.422
Clc1ccc(cc1)CN1C(=O)[C@H](NC1=O)Cc1c2c([nH]c1)cccc2	744240	0	3.627	353.802
[Ir+3](Cl)(P(C)(C)=[CH2])(P(C)(C)=[CH2])(P(C)(C)=[CH2])n1c2c(c3c1cccc3)cccc2	635002	1	1.943	619.077
O(C(=O)C(\C=C\C(C)C)(C(C)C)C(OCC)=O)CC	128938	0	3.517	270.365
s1c2c(nc1C=1[C@H]3[C@H](N(C=1)[C@@H]1O[C@@H](CO)[C@@H](O)[C@@H]1O)C=CC=C3)cccc2	731178	1	1.27	384.449
FC(F)(C(=O)CC(=O)c1occc1)C(F)(F)C(F)(F)F	9711	0	2.947	306.134
Brc1c(C)c(cc(C(C)C)c1O)C1(OS(=O)(=O)c2c1cccc2)c1cc(C(C)C)c(O)c(Br)c1C	7819	0	8.38	624.381
O(C)c1ccc(N=NC(=O)N[C@H](CC(C)C)C(=O)N[C@H](Cc2ccccc2)C(=O)[O-])cc1	678404	1	3.209	439.484
O\N=C(/CC([NH+]1CC1)(C)C)\C	101253	0	-0.942	157.233
S1c2c(cc(cc2)C)C(=O)C=C1C	108757	0	2.946	190.261
Fc1ccc(cc1)Cn1cc(c2c1cccc2OC)C(=O)c1occc1	746052	0	4.901	349.355
O=C1NN(C)[C@@H](C1)c1ccccc1	14949	0	0.634	176.215
S(CCc1ccccc1)C(N)=N	30645	0	2.328	180.27
O(C(=O)C1CCCC1)C	87553	0	1.691	128.169
Nc1cc(ccc1N)C	1495	0	0.822	122.168
O=C1N2N(c3c(cccc3)C(=C2)c2ccccc2)C(=O)[C@@H]1CCCCC	102825	0	4	346.422
ClC=1n2c(nc3c2cccc3)C(=C2C=1CCCC2)C#N	631382	1	4.601	281.74
S(C(=O)C)[C@H]1C[C@@H](CC[C@H]1C)[C@H](CSC(=O)C)C	48041	0	3.495	288.469
Clc1ncc(cc1)C(=O)c1sccc1	343343	0	2.91	223.679
S1CC(=O)N([C@@H]1c1cc(O)ccc1)c1oc(nn1)Cn1cnnc1	746514	0	0.259	344.348
Clc1nc(Cl)nc2n(cnc12)CC1(COC1)Cn1c2nc(Cl)nc(Cl)c2nc1	745358	1	2.719	460.105
S(=O)(=O)(NCCCC[C@H]([NH3+])C(=O)[O-])c1ccc(cc1)C	66203	0	-1.366	300.374
O1C[C@H]2[C@@H]([C@@H](c3c(cc4OCOc4c3)[C@@H]2O[C@H]2O[C@@H]3[C@H](O[C@@H](OC3)c3occc3)[C@H](O)[C@@H]2O)c2cc(OC)c(OC)c(OC)c2)C1=O	683582	1	2.184	654.615
O=C1C(=Cc2c(C1=O)c(CC\C=C(\C)/C)c(cc2)C)C(C)C	648341	1	5.701	296.403
[nH]1c2c(c3c1cccc3)c(ccc2C)C	95997	0	4.295	195.26
O1c2c(-c3nc4c5c(ccc4cc3C1=O)cccc5)cccc2	742940	0	4.473	297.307
S(C[C@H]([NH3+])C(=O)[O-])C1(c2c(-c3c1cccc3)cccc2)c1ccc(cc1)C	123531	0	1.914	375.483
O=C1NC(=O)N(Cc2ccccc2)[C@@H](C1)C	51027	0	1.254	218.252
O(C)c1c2c(ccc1)C(=O)C=CC2=O	618315	1	1.741	188.179
O1[C@@H](CC(=O)[C@@H](\C=C(/C)\[C@@H](O)[C@@H](OC)C(=O)[C@@H](C[C@@H](\C=C\C=C\C=C(/C)\[C@@H](OC)C[C@H]2O[C@](O)([C@@H](CC2)C)C(=O)C(=O)N2[C@@H](CCCC2)C1=O)C)C)C)[C@@H](C[C@H]1C[C@@H](OC)[C@H](O)CC1)C	226080	1	6.295	914.172
Clc1cc2[nH+]c3c(cc(OC)cc3)c(NC[C@@H](O)C[NH+](CC)CC)c2cc1	11515	1	2.849	389.919
Brc1ccc(cc1)-c1nc(sc1)C=1C(=O)CN([N-]C(OCC)=O)C=1N	743273	0	2.416	422.276
O1c2c(cc3OCOc3c2)[C@@H]([C@@H](C)[C@H]1[NH+]1CCCC1)c1cc(OC)ccc1	666229	1	2.808	368.446
s1cccc1\C=C\[N+](=O)[O-]	22059	0	1.763	155.174
OC=1C(=O)C=C2C(=CC=C3[C@]4(CC[C@@]5([C@@H](C[C@@](CC5)(C(=O)[O-])C)[C@@]4(CC[C@@]23C)C)C)C)C=1C	70931	1	4.001	449.602
O=C([O-])\C=C\Nc1ncc(cc1)C	26143	0	-0.331	177.18
O1c2c(cc3OCOc3c2)[C@@H]([C@@H](C)[C@H]1[NH+]1CCCCC1)c1cc(OC)c(O)c(OC)c1	671167	1	3.006	428.498
O=C(Cc1ncccc1)c1ccccc1	145890	0	2.546	197.233
Fc1ccc(cc1)C1(OCCO1)CCC[NH+]1CCC2(N(CN([C@H](CC)C)C2=O)c2ccccc2)CC1	665870	1	2.836	496.637
O=[N+]([O-])c1c2c([nH+]c3c(cccc3)c2NCCCCC[NH+](C)C)ccc1	645804	1	3.007	354.446
Clc1ccc(cc1)\C=C/1\CCC[C@@H](C[NH+](C)C)C\1=O	670686	1	2.379	278.797
O1CCCC[C@H]1N1C=CC(=NC1=O)N	92708	0	-0.024	195.218
Oc1c2c(C(=O)C=C([C@@H](O)C\C=C(\C)/C)C2=O)c(O)cc1	252844	1	2.444	288.295
Clc1cc([N+](=O)[O-])ccc1NC(=O)COc1cc(Cl)c(Cl)cc1Cl	203912	0	5.002	410.036
O(C(=O)c1ccc(\N=C\c2cnc(nc2N)N)cc1)CC	111560	0	1.418	285.301
Oc1ccc2n(c3c(c2c1C[NH+](C)C)C(=O)c1c(cccc1)C3=O)C	722974	1	1.87	335.376
O(C)c1cc2c([nH]c(-c3ccccc3)c2\C=C(\C#N)/C#N)cc1	749027	1	4.102	299.326
O=[N+]([O-])c1cc2c([nH]cc2C[NH+](C)C)cc1	56889	0	0.53	220.248
S=C(N(CC)CC)[N-]\N=C(/C)\c1nc(ccc1)C	673829	1	3.498	263.382
FC(=O)C([C@H](CC)c1cc2c(cc(OC)cc2)cc1)(C)C	76165	0	4.719	288.357
Clc1ccccc1[C@]1(O[C@@]1(C(=O)N)C(=O)[O-])c1ccc(Cl)cc1	92007	0	1.422	351.161
O(C(=O)C)c1cc2c3c([n+](cc2cc1OC(=O)C)C)c1cc(OC(=O)C)c(OC(=O)C)cc1cc3	180966	1	3.522	476.455
S1c2n(C=C1C)c(\C=C\1/c3c(N(C)C/1=O)cccc3)c(n2)C	736793	1	2.265	309.385
O(C)c1ccc(Nc2c3c([nH+]c4[nH]c5c(c24)cccc5)cccc3)cc1	730510	1	5.333	340.398
O=C(c1ccc([N+](=O)[O-])cc1)c1ccccc1	406623	0	3.128	227.215
Clc1cc(\N=C\c2ccccc2O)ccc1C	91269	0	4.335	245.704
O=C1C2=C(N(CCC[NH3+])C(=O)c3cc([N+](=O)[O-])ccc23)c2c1cccc2	731155	1	0.338	350.348
S(=O)(=O)(N(C1CCN(CC1)C(OC(C)(C)C)=O)c1ccc(F)cc1)N[C@@H](C(C)C)C(OC)=O	749200	0	2.516	487.585
s1cccc1C(=O)c1ccccc1Cc1sccc1	99462	0	4.694	284.396
FC(F)(F)C=1O[C@@H]2O[C@@]3(OO[C@]24[C@@H](CC[C@H]([C@@H]4CC3)C)C=1COCCOCC=1[C@H]2[C@@]34OO[C@@](O[C@H]3OC=1C(F)(F)F)(CC[C@H]4[C@@H](CC2)C)C)C	724780	1	4.834	726.698
O(C)c1c(OC)cc(cc1OC)Cc1cnc(nc1N)N	106568	0	1.543	290.318
O(C)c1cc(ccc1OC)C=1N(C=O)C(=O)C(C#N)=C(C=1)c1n(ccc1)C	746900	0	2.211	363.367
O1C[C@]12[C@@H]1O[C@@H]3C=C(C)[C@@H](OC(=O)CC(C)C)C[C@]3(COC(=O)C)[C@@]2(C)[C@H](OC(=O)C)[C@H]1O	138780	1	0.986	466.521
O1C[C@H]1COc1cc(ccc1)C	86974	0	2.016	164.201
O(C)c1cc2-c3[nH]c4c(cc(cc4)C#N)c3CC(=O)Nc2cc1OC	708244	1	2.768	333.341
Clc1cc(N2CC[NH+](CC2)CSc2ccc(cc2)C)ccc1	29534	0	3.712	333.899
O(C(=O)c1ccccc1C(OCC)=O)CC	8905	0	2.238	222.237
S(=O)(=O)(CS(=O)(=O)c1ccccc1)c1ccccc1	47076	0	2.512	296.362
O1C(=O)[C@H](/C(=N/c2ccccc2[N+](=O)[O-])/C)C(=O)C=C1C	34868	0	1.718	288.255
o1cc(c2c1cc(OC)cc2)CC(=O)NNC(=O)c1ccc(cc1)CC	746349	0	3.136	352.384
O(C)c1cc2c3c([nH]c2cc1)c(c1c(c3C)c(ncc1)NCCC[N@H+](CCCNc1c2c3n(-c4c(cccc4)C2=O)cnc3cc1)C)C	695938	1	5.417	638.781
O=[N+]([O-])c1ccc(cc1)Cc1ccc([N+](=O)[O-])cc1	6337	0	3.593	258.229
OC1=C/C(/C=C1NC(=O)C)=C/[N+](=O)[O-]	99756	0	-0.838	196.16
S(=O)(=O)(NC(N)=N)c1ccc(Nc2cc([nH+]c3c2cc(OCC)cc3)C)cc1	749619	0	2.996	400.475
S1(=O)(=O)CC(=C(C1)c1ccc(cc1)C)c1ccc(cc1)C	243789	0	3.995	298.399
O(C)c1ccc(NC(=O)N2CC2)cc1	77161	0	0.954	192.214
O(C)c1c2[nH+]c3c(cccc3)c(NCCC[NH+](C)C)c2c([N+](=O)[O-])cc1	652886	1	1.955	356.419
Clc1nc(cc(C)c1C#N)C	10732	0	2.2	166.608
Fc1c2c(ccc1)c(ccc2)C(=O)c1ccccc1C(=O)[O-]	97672	0	2.503	293.269
S(=O)(=O)([O-])c1cc(O)c2c(c1)ccc(N)c2N=Nc1ccc(F)cc1	45184	0	1.412	360.34
O1C(C)=C(C(OCC)=O)C(=O)C(C(OCC)=O)=C1C	7745	0	1.158	268.263
O=C1C([C@@H]2CC[C@@]3(C(=CC(=O)[C@@H]4[C@@H]5CC(CC[C@@]5(CC[C@@]34C)C(=O)n3ccnc3)(C)C)[C@]2(C=C1C#N)C)C)(C)C	727038	1	5.484	541.724
O(c1cc(C(=O)\C=C\c2ccc(O)cc2)c(O)cc1OC)c1ccc(cc1)\C=C\C(=O)c1ccc(O)cc1O	720813	1	6.149	524.517
O(CCOC)Cn1c2ncnc(N)c2c(C#N)c1NC	748696	0	0.074	276.294
S(ONc1cc(NOS(=O)c2ccc(cc2)C)ccc1)(=O)c1ccc(cc1)C	133390	0	5.855	416.514
Clc1cc(O)c2ncc(Cl)cc2c1	673463	1	3.103	214.048
O=C1N=C(N[C@H](C1)c1ccccc1)N	51034	0	0.754	189.214
O=C(N)[C@H]([NH+]1CCN(CC1)c1cc(ccc1)C)C	93284	0	0.213	248.344
Brc1c2CC[C@H]3[C@@H]4C[C@@H](Br)C(=O)[C@]4(CC[C@@H]3c2cc(Br)c1O)C	682689	1	5.997	507.054
O(C)c1ccc(NC(=O)Nc2ccc(cc2)C(C)C)cc1	158972	0	3.7	284.353
Clc1cc([N+](=O)[O-])ccc1N=Nc1cc(C(=O)Nc2cc(Cl)ccc2)c(O)cc1	135618	1	5.965	431.229
O=C1[C@H]2[C@H]([C@@H]3CC[C@](O)(C(=O)C)[C@]3(C1)C)CC[C@@H]1C[C@H](O)CC[C@@]12C	23156	0	1.927	348.476
O(C(=O)C1(CC[NH+](CC1)CCc1ccc(NC(=O)CCC(=O)[O-])cc1)c1ccccc1)CC	23841	0	0.281	452.543
S1[C@H](c2c(n(nc2C)C(=O)c2ccccc2O)NC1=N)c1ccc2c(cccc2)c1O	658001	1	4.501	430.479
S(=O)(=O)([O-])c1ccc(NC(=O)c2ccc([N+](=O)[O-])cc2)cc1	37085	0	-0.403	321.285
Clc1cccc(Cl)c1\C=N\Nc1nc(nc(N2CCCC2)c1C#N)N	733012	1	4.353	376.243
O=C1c2c(N(C)C1=O)cccc2	42449	0	0.876	161.157
O([C@@H](C(=O)[O-])C)c1ccc(cc1)C(C)(C)C	60452	0	1.705	221.272
Oc1c(cc(cc1C(C)(C)C)C(=O)\C=C\c1n[nH]cc1)C(C)(C)C	709104	1	5.133	326.433
O=C(NC(=O)C)C	405639	0	-0.843	101.104
S=C1N=CNc2n(cnc12)CC=C	76934	0	0.912	192.241
O=C1c2c(cccc2)C(=O)C(NCC[NH+](C)C)=C1NC(=O)C	651763	1	-1.605	302.348
Clc1ccc(cc1)\C=N\[N-]C(=S)Nc1ccc(OC)cc1	748523	0	5.226	318.801
O(Cc1nnc(n1Nc1ccccc1)CCCCCCCCc1nnc(n1Nc1ccccc1)COc1ccc2c(cccc2)c1O)c1ccc2c(cccc2)c1O	697167	1	10.159	774.909
O1C(=Nc2c(cccc2)C1=O)c1ccccc1	16082	0	3.14	223.227
s1cccc1-c1cc(nc(N2CCOCC2)c1C#N)-c1cc(OC)c(OC)c(OC)c1	748707	1	4.316	437.511
ClC1=C(NC(=O)C(=O)CC(=O)c2ccccc2NC2=Cc3c(cccc3)C(=O)C2=O)C(=O)c2c(cccc2)C1=O	641245	1	3.42	552.918
O=C1c2c(NC1=O)ccc(C)c2C	104997	0	1.642	175.184
OC=1n2c(nnc2)N=C(C)C=1CC	119965	0	1.762	178.191
OCCCC[N@H+]1C[C@H]([NH2+]CC1)C	29524	0	-2.57	174.284
Clc1ncnc(Nc2ccc(cc2)C)c1N	87696	0	2.753	234.685
s1cccc1\C=N\Nc1nc2n(c3c(c2nn1)cccc3)C	370596	0	4.003	308.361
O1[C@@](CC(=C)C1=O)(COC1=CC(Oc2c1cccc2)=O)c1ccccc1	668270	1	3.628	348.349
Clc1ccc(cc1)C=1NC(=O)N(C=1)c1cc(ccc1)C(=O)\C=C\c1cc(O)ccc1	749337	1	4.416	416.856
Clc1[nH]c2c(cc(OC)c(c2)C)c1\C=C\1/c2cc(F)ccc2NC/1=O	734185	1	4.158	356.778
O=CN1C[C@H]([NH+](CC[NH+]2[C@@H](CN(C[C@H]2C)C=O)C)[C@@H](C1)C)C	72080	0	-2.877	312.451
O=C1NC(=CC=C1C(OC)=O)C(OC)=O	157767	0	-0.423	211.171
O=[N+]([O-])c1cc2[nH]ccc2cc1	89285	0	2.017	162.145
S(C#N)c1ncnc(c1)C	102865	0	1.347	151.189
O(C)c1ccc(-n2c3c(c4cc(O)ccc24)C(=O)c2c(cccc2)C3=O)cc1	720726	1	4.917	369.369
S(Cc1ccc([N+](=O)[O-])cc1)c1c2c(nc3c1cccc3)cccc2	699934	1	5.372	346.402
O1c2c(OC1)cc1NC(=CC(=O)c1c2)c1cc(OC)cc(OC)c1	652112	1	2.696	325.315
[Ni+]12(OC(=O)C)[N@@H+](N[C@@H]3N1C=CC=C3)[C-]([C@@H]1N2C=CC=C1)c1ccccc1	625542	1	0.458	395.081
s1c2c(nc1N1CCCCC1)cccc2	55897	0	3.534	218.318
Clc1cc(Cl)cc(\C=C\2/SC(=S)[N-]C/2=O)c1O	44156	0	4.031	305.18
O(CCCOc1ccc(cc1)-c1[nH]c2cc(N3CC[NH+](CC3)C)ccc2n1)c1cc2N=C[C@H]3N(CCC3)C(=O)c2cc1OC	727931	1	3.012	595.711
S(P(=O)([O-])[O-])CC[NH3+]	87174	0	-3.696	156.121
S=C=Nc1ccc(cc1)C(OCC[NH+](CC)CC)=O	34051	0	1.72	279.378
Clc1c(N)c(Cl)c(Cl)[nH+]c1C(=O)[O-]	233899	0	0.717	241.459
o1[n+]([O-])c2c(n1)c([N+](=O)[O-])ccc2N1CC[NH+](CC1)C	207895	1	-2.838	280.26
O1[C@@H]\2C([C@H](CC/C/2=C\c2cc(OC)c(OC)cc2)C)=C(C(C#N)=C1N)c1cc(OC)c(OC)cc1	690761	1	4.8	474.548
O(C)c1ccccc1\C=N\N=C/1\c2c(-c3c\1cccc3)cccc2	120664	0	4.811	312.365
O=C([O-])c1c2c(ncc1[N+](=O)[O-])cccc2	26138	0	0.066	217.158
Clc1cc2c(nc(Nc3cc(ccc3)/C(=N\O)/C)c3c4c([nH]c23)cccc4)cc1	721042	1	6.07	400.86
c1ccccc1CCc1ccccc1	8789	0	4.26	182.261
S=C1NC(C)=C(C(=O)N2CCC[C@H]2C(OC)=O)[C@H](N1)c1cc(OC)c2OCOc2c1	748739	0	1.966	433.478
S1c2c(Nc3c1cccc3)cc1c(c2)cccc1	81120	0	4.576	249.33
O1CO[C@H](Cn2nnc(c2-c2ccccc2)-c2ccccc2)[C@@H](O)[C@H](O)[C@H]1Cn1nnc(c1-c1ccccc1)-c1ccccc1	683367	1	5.932	600.666
S(SC[C@H](NC(=O)Cc1ccccc1)C(=O)[O-])C[C@H](NC(=O)Cc1ccccc1)C(=O)[O-]	3198	0	-0.546	474.55
S1CCC(=O)c2c1c1c(cc2)cccc1	109424	0	2.954	214.283
O(C)c1cc(N(C)C)ccc1\C=C/1\c2c(-n3[n+](C)c(cc\13)-c1ccccc1)cccc2	699476	1	6.177	408.515
O(C)c1ccc(cc1)C1(C)[C@H](C#N)C(=O)NC(=O)[C@@H]1C#N	108369	0	0.848	283.282
Clc1ccc(-n2c3NC=NC(=O)c3nc2)cc1	30103	0	1.637	246.652
O1[C@@H]2C[C@H](O)[C@@]3([C@H]([C@H](OC(=O)c4ccncc4)[C@]4(O)C[C@H](OC(=O)[C@H](O)[C@@H](NC(=O)c5ccccc5)c5ccccc5)C(=C([C@@H](OC(=O)C)C3=O)C4(C)C)C)[C@]2(OC(=O)C)C1)C	673190	1	1.904	854.894
N(/N)=C(\c1ccc(N(C)C)cc1)/c1ccc(N(C)C)cc1	707050	1	3.121	282.383
n1ccncc1\C=C\c1ccc(N(C)C)cc1	28431	0	2.105	225.289
O(C)c1ccc(cc1)\C=C\1/CCC\C(=C\c2cc(C[NH+]3CCCCC3)c(O)cc2)\C/1=O	687006	1	4.309	418.548
O(Cc1ccccc1)c1c(NC=O)c(ccc1C)C(=O)[O-]	87671	0	1.08	284.287
Ic1cc2-c3c(cc(OC)c(OC)c3OC)CC[C@H](NC(=O)C)c2cc1OC	33409	1	3.547	497.323
Clc1ccc(-n2nc(C(=O)N3NC(=O)CC3=O)c(O)c2)cc1	748381	1	1.289	320.688
Clc1ccc(SCC(=O)Nc2c3cc(OC)ccc3[nH+]c3c2ccc(Cl)c3)cc1	13468	1	6.118	444.354
O=C1N(C(=O)C=C1)c1ccc(cc1)Cc1ccc(N2C(=O)C=CC2=O)cc1	44754	0	2.921	358.347
O=C1c2c(CC[C@@H]1C[N+](C)(C)C)cccc2	656280	1	1.046	218.315
S(=O)(=O)([O-])c1cc(Nc2cc(N)ccc2)c2c(c1N)C(=O)c1c(cccc1)C2=O	115372	0	-0.047	408.407
Brc1ccc(cc1)C(=O)C[C@@H](C(C(OC)=O)C(OC)=O)c1ccccc1	78841	0	3.961	419.266
O(C)c1cc2c(N=C(NC2=O)Cc2ccc(cc2)C#N)cc1OC	745417	0	2.374	321.33
S(=O)(=O)([O-])Cc1c2c(ccc1)cccc2	2751	0	-0.167	221.252
Clc1c([N+](=O)[O-])c(OCCOC(=O)N(C)C)c(Cl)cc1Cl	30500	0	3.742	357.574
S(CC[NH+](CC)CC)C(=O)[C@@](O)(C1CCCC1)c1ccccc1	121425	0	2.597	336.512
S=C1NC(=NC(=S)N1)N	8147	0	1.387	160.221
n1ccccc1CCc1c2c(ccc1)cccc2	10627	0	4.025	233.308
Clc1ccccc1N1CC[NH+](CC1)CCO	87105	0	0.513	241.737
O(CC)c1ccccc1C(=O)N	28787	0	1.164	165.189
Clc1ccccc1C(=O)c1cc(Cl)ccc1NC(=O)C[NH+]1CC[NH+](CC1)CCCCCCOc1cc2N=C[C@@H]3N(CCC3)C(=O)c2cc1OC	743134	1	3.217	722.7
OC1C[C@@H]2[N+]([O-])([C@H](C1)CC2)C	72853	0	-0.537	157.21
O1CC[NH+](CC1)CN1C(=O)c2c(cccc2)C1=O	25113	0	-0.89	247.27
[Zn+2]1234(Cl)O[C-](N[N@H+]1[C-](C=1N2[C@H](C=CC=1)[C@@-]([N@@H+]3N[C-](O4)c1ccccc1O)C)C)c1ccccc1O	617572	1	0.601	535.33
o1c2c(nc1NC(=[NH2+])N)cccc2	8967	0	0.758	177.183
[NH2+]1[C@@H](CCC)C([NH2+][C@@H](CCC)C1(C#N)C#N)(C#N)C#N	708049	1	-0.996	272.349
S1C[N@@H+](CN(Cc2occc2)C1=S)C(C)(C)C	710869	1	2.262	271.422
Clc1cc([N+](=O)[O-])ccc1NC(=O)c1cccc([N+](=O)[O-])c1O	82020	1	2.825	337.672
O1[C@H]2[C@H](C[C@]3([C@H]([C@@H](C2)C)[C@@H](O[C@@H]2O[C@H](COC(=O)C)[C@@H](O)[C@@H](O)[C@H]2O)CC3=O)C)C(=C)C1=O	136722	1	0.157	468.494
n1c2N(c3c(cccc3)C(=N)c2c(cc1C)C)CCCCCCN1c2c(cccc2)C(=N)c2c1nc(cc2C)C	681454	1	8.117	528.69
O1CCN(CC1)C(=O)C[NH+]1CCOCC1	51936	0	-2.6	215.269
S=C(NC=1C(=O)NC(=O)NC=1N)NC(C)C	28371	0	-0.397	243.286
OC[C@H]1[N@H+](C1)C1CCCCC1	44680	0	-0.075	156.245
Clc1ccc(NC(Sc2nc3[nH]c4c(c3nn2)cccc4)=O)cc1	343970	0	4.788	355.802
S=C1NC(=O)\C(=C\c2cc(OCC)c(O)cc2)\C(=O)N1	90748	0	1.854	292.31
S(=O)(=O)(N(OCCC[NH3+])CCCCCC[NH3+])c1c(C)c(c2OC(CCc2c1C)(C)C)C	703120	1	1.298	457.67
BrC=1C(=O)NN=CC=1Br	38292	1	0.6	253.879
P(OC(C)C)(OC(C)C)(=O)CCCCCCCCC\C=C\c1cc2OCCOCCOCCOCCOc2cc1	657490	1	5.906	584.721
[NH3+]CCc1ccccc1	10811	0	0.252	122.188
Clc1ccc(SS(=O)(=O)C)cc1	40484	1	2.611	222.712
Fc1ccccc1-c1nc2c(cc3OCOc3c2)c(OCCCC(=O)[O-])c1	683478	1	2.497	368.335
s1ccnc1N1[C@@H](C(C(=O)c2ccc(OCC=C)cc2)=C([O-])C1=O)c1ccccc1F	744243	0	3.062	435.448
s1c(nnc1Nc1ccccc1)CSC1=Nc2c(cccc2)C(=O)N1CC	686368	1	4.386	395.501
s1ccc(C)c1\C=N\[N-]C(=S)N	12759	0	2.731	198.289
O=C1c2c3N(c4c1cccc4)C(=O)N(CC[NH+](C)C)C(=O)c3ccc2NCCC[NH+](C)C	687308	1	-0.846	437.535
n1nnn(C(CC(C)(C)C)(C)C)c1N	11128	0	1.304	197.281
O(C(=O)\C=C\c1cc(O)c(O)cc1)C1[C@@H](O)CC(OC(=O)\C=C\c2cc(O)c(O)cc2)(C[C@@H]1O)C(=O)[O-]	91529	0	0.213	515.443
Clc1cc(OC(=O)N(C)C)ccc1	14545	0	2.463	199.634
O([C@H](O)C(=O)c1c2CCCCc2cc2c1CCC2)C	670314	1	3.755	260.328
O(C)c1cc2C[N@H+]3[C@@H]4[C@H](c2cc1O)[C@@H](O)[C@@H](O)C=C4CC3	305489	1	-0.874	290.334
O1c2c(C(=O)C(C\C=C(\C)/C)=C1c1ccc(O)cc1O)c(O)c(C\C=C(\C)/C)c(O)c2C\C=C(\C)/C	710342	1	7.698	490.587
Brc1ccc(cc1)\C=N\[N-]C(=O)[N-]\N=C\c1ccc(Br)cc1	683856	1	4.364	422.074
S1(=O)(=O)N(C)C(=Cc2c1cc(cc2)C)c1ccccc1	117897	0	2.87	285.361
O1[C@@H]2[C@@H](C[C@@H](O)[C@]3(OC3)CC[C@@H]3O[C@@]3(CCC[C@H](C)[C@H]2OC(=O)C)C)C(=C)C1=O	734916	1	2.086	408.485
Clc1nc(nc(Nc2ccccc2C)c1CC)N	47529	0	4.217	262.738
O(C)c1cc2c(cc1)[C@@](O)(CCC2)C#C[C@@]1(O)CCCc2cc(OC)ccc12	30844	0	4.571	378.461
S(CC(=O)Nc1cc([N+](=O)[O-])ccc1F)c1oc(nn1)-c1c2c([nH]c1)cccc2	744182	0	3.242	413.382
O=C(CC(=O)\C=C\c1ccccc1)c1ccccc1	36556	0	3.612	250.292
O(C(=O)C1(CC[NH+](CC1)C[C@H](O)c1ccc(NC(=O)C)cc1)c1ccccc1)CC	23840	0	1.077	411.514
[Sn](OC(=O)c1cccc(F)c1F)(O[Sn](OC(=O)c1cccc(F)c1F)(CCCC)CCCC)(CCCC)CCCC	643853	1	11.019	796.065
O(C(=O)[C-]([n+]1ccccc1)C(OCC)=O)CC	149960	0	2.052	237.252
Oc1cc(O)ccc1/C(=N/C1CCCCC1)/C	126250	0	3.204	233.306
S1[C@@H]2[C@@H]3[N@@H+]([C@@H](c4c2c(OC(=O)C)c(c2OCOc24)C)COC(=O)[C@]2([NH2+]CCc4cc(O)c(OC)cc24)C1)[C@@H](O)[C@@H]1[NH2+][C@H]3c2c(cc(C)c(OC)c2O)C1	638718	1	0.008	750.834
S\1c2c(N=C(CC(=O)c3ccccc3)/C/1=C/C(=O)c1ccccc1)cccc2	720429	1	5.328	383.462
Brc1cc(Cl)c(Nc2c(cc3n(cnc3c2F)C)C(=O)NOCCO)cc1	741078	1	3.234	457.681
F[C@@H]1C[C@H]2[C@@H]3C[C@@H](C)[C@](O)(C(=O)C)[C@]3(CC[C@@H]2[C@]2(CC[C@H](O)C[C@]12O)C)C	63567	0	2.226	382.509
n12nnnc1CCCCC2	5729	0	0.568	138.17
Ic1sc(I)c2[C@@H]3NC(O[C@@H]3C(=O)c12)=O	691895	1	2.052	446.988
Clc1cc(Cl)ccc1O[C@H](C(=O)[O-])C	39624	0	1.634	234.056
Oc1c2c(nc(c1)C)c(ccc2C)C	109813	0	3.029	187.238
c1c(C(C)C)c(C)c(cc1C(C)C)C(C)C	31925	0	5.898	218.378
O(C)c1c(OC)cc(-n2cncc2-c2ccc(OC)cc2)cc1OC	733436	1	3.243	340.373
S(SSCc1ccccc1)Cc1ccccc1	709944	1	5.143	278.456
O=C1NC(=Nc2n(ncc12)C)NCC	11596	0	-0.052	193.206
S=C1NC2=C(N(C)C(=O)N(C)C2=O)N1CC	28294	0	0.821	240.282
O=[N+]([O-])c1cc(ccc1)\C=N\Nc1ccc([N+](=O)[O-])cc1	76230	0	3.237	286.243
S(SCC=C)c1ncnc2n(cnc12)[C@@H]1O[C@@H](CO)[C@@H](O)[C@@H]1O	748641	1	0.615	356.421
S=C(N(CCN(C(=S)[N-]\N=C(/C)\c1ncccc1)C)C)[N-]\N=C(/C)\c1ncccc1	667880	1	4.854	440.588
S1\C(=C/c2sccc2)\C(=O)[N-]C1=S	31054	0	2.898	226.318
O(Cc1ccccc1)C1=CNC=NC1=O	95993	0	0.445	202.209
o1cccc1CNC(=O)Nc1c(cccc1C)C	205843	0	2.684	244.289
Brc1n2C=CSc2nc1-c1ccncc1	741787	0	2.08	280.144
O=C1N(CCCC1)CCCCC#Cc1cc(ccc1)C#Cc1nccnc1	745017	0	3.934	357.448
O(C)c1cc2c([nH+]c3c(c2NCC[NH+](C)C)c([N+](=O)[O-])ccc3)cc1	662191	1	1.892	342.392
ClC=1C(Cl)=C(Cl)/C(=C\c2ccc([N+](=O)[O-])cc2)/C=1Cl	14034	1	4.251	336.986
S(=O)(=O)(CCS(=O)(=O)c1ccccc1)c1ccccc1	2716	0	2.53	310.389
O=C(N1CCCC1)[N-]n1c2c(nc1)cccc2	741634	0	1.487	229.258
OC=1n2c(nnc2)N=C(C=1)C	7528	0	0.82	150.138
S(C)c1nc(nc2n(cnc12)Cc1ccccc1)N	42380	0	2.41	271.341
Oc1cc2c(N3c4c(C2=O)c(NCC[NH2+]CCO)ccc4C(=O)N(CC[NH+](C)C)C3=O)cc1	693120	1	-1.896	455.507
O1CC[NH+](CC1)[C@H]([C@@H]([NH+]1CCOCC1)C(=O)c1ccccc1)c1cc(ccc1)C	5913	0	0.202	396.522
[O-][N+]1=NC(=N)N(c2c1cccc2)C	623599	1	1.195	176.175
S(=O)(=O)([O-])c1cc2c(cc1N)c(S(=O)(=O)[O-])cc(S(=O)(=O)[O-])c2	7561	0	-6.745	380.351
[NH+](=C/1\CC=C(C=C\1)C)/[C-]=N/c1ccc(cc1)C	20627	0	3.001	224.301
S(CC[NH+]1CCCC1)C1=NC=2N(c3ccccc3)C(=S)N(C(=S)C=2C(=N)N1c1ccccc1)c1ccccc1	703445	1	7.309	569.786
[As](=O)([O-])([O-])c1cc(NC(=O)c2ccccc2)c(O)cc1	92892	0	-0.161	335.144
o1c(ccc1[N+](=O)[O-])\C=N\N1C(=N[N-]C1=O)c1ccccc1	698058	1	2.242	298.234
O1c2c(cccc2)C(=O)C=C1c1occc1	45933	0	2.531	212.201
O1CCC[C@H]1N1C=C/C(/NC1=O)=N\O	107439	0	-0.468	197.191
ClC1=C(N2CCN(CC2)C2=C(Cl)C(=O)c3c(cccc3)C2=O)C(=O)c2c(cccc2)C1=O	40341	1	3.432	467.301
Clc1cc(NCC(=O)NN2C(=Nc3c(cccc3)C2=O)c2ccccc2)ccc1	657345	1	3.857	404.849
Br[C@H]1c2c(cccc2)\C(=N\CCOC(=O)Nc2ccccc2)\c2c(cccc2)[C@@H]1Br	670132	1	6.272	528.236
Fc1ccc(cc1)C(=O)CCCC	88288	0	3.354	180.219
O1[C@H](C=C(C[C@H](O)CCCCC[C@@H](O)CCCC[C@@H](O)[C@@H]2O[C@H](CC2)[C@@H](O)CCCCCCCCCCCC)C1=O)C	695404	1	8.327	596.878
S\1CC(=O)N(Cc2occc2)/C/1=N/c1ccccc1OC	300548	0	2.837	302.348
Clc1cc2Sc3n(S(=O)(=O)c2cc1C(OC)=O)c(nn3)Nc1ccc(cc1)C	720643	1	4.479	436.893
O=C([O-])c1ncc2c(c1)cccc2	53385	0	0.172	172.16
[P+]12(c3c(Nc4c1cccc4)cccc3)c1c(Nc3c2cccc3)cccc1	666489	1	6.155	365.387
S(C)c1c2cc(OC)c(OC)cc2nnc1	39363	0	2.057	236.29
O=C1N(N)C(=O)c2c1cccc2	407982	0	0.164	162.145
Clc1cc\2c(Sc3c(cccc3)/C/2=C/CC[NH+]2CC[NH+](CC2)CCO)cc1	64087	1	1.42	402.981
Clc1ccc(cc1)/C(=C/c1cc([N+](=O)[O-])ccc1)/C(=O)[O-]	89108	0	2.49	302.689
S(=O)(=O)(Nc1ccc(cc1)C(=O)C)c1ccc([N+](=O)[O-])cc1	12997	0	1.951	320.32
O(C)c1cc(cc(OC)c1)Cn1c2c(c3cc(O)ccc13)C(=O)c1c(cccc1)C2=O	720725	1	4.907	413.422
o1cccc1[C@@H]1NC(=O)NC1=O	16124	0	-0.047	166.134
P1(=O)([O-])Cc2c(-c3c1cccc3)cccc2	112271	0	0.984	229.191
O(C(=O)c1ccc(NCC2=CC(=O)C=CC2=O)cc1)C12CC3CC(C1)CC(C2)C3	681151	1	4.038	391.46
O1C[C@@]2(Oc3c(cc4OCOc4c3)[C@@H]([C@H]2C1=O)c1cc(OC)c(OC)c(OC)c1)OC	665488	1	2.758	430.405
Brc1cc(OC)c2OC(=O)C(=Cc2c1)c1nc2Sc3c(-n2c1)cccc3	718315	1	4.638	427.271
O1[C@@H]2[C@]34CC[N@H+]([C@H](Cc5c3c1c(cc5)-c1cc(O)ccc1)[C@]4(O)Cc1c3c([nH]c12)cccc3)CC1CC1	711019	1	3.807	491.6
O=C(\C=C\c1ccc(cc1)C)C(C[NH+]1CCCCC1)(C)C	643993	1	3.004	286.432
Oc1cc2CC[C@H]3[C@@H]4CC[C@@](O)(C)[C@]4(CC[C@@H]3c2cc1)C	52245	1	4.043	286.409
Clc1cc(Nc2nc(ccc2C(=O)N\N=C\c2cccnc2)C(F)(F)F)c(cc1)C	743915	1	4.992	433.814
s1c2c(nc1C=1C3(CCCC3)C(=[NH+]C=1N)N)cccc2	743256	0	2.363	285.387
S1CCN(CC1)c1ccc(N2C[C@@H](OC2=O)CNC(=O)C)cc1F	742407	0	1.639	353.412
OCC[NH+](CCO)C[C@@H](O)C	30493	0	-2.482	164.223
[SeH2]=C(N)c1ncn(C)c1N	251219	1	-0.824	205.12
O(C(=O)c1c(c[nH]c1C)-c1ccccc1)CC	25341	0	2.791	229.274
Clc1c2c(oc1)[nH+]c1c(cccc1)c2Nc1cc2OCOc2cc1	727803	1	4.592	339.752
O(CC)c1ccc(NC(OCC(C)C)=O)cc1	88435	0	3.117	237.295
O(C(=O)c1ccc(NCc2cc(O)ccc2O)cc1)C12CC3CC(C1)CC(C2)C3	680410	1	4.736	393.475
Clc1c(Nc2ccccc2C(=O)[O-])c(Cl)ccc1C	95309	0	3.35	295.141
O1C2=CC(=O)c3c4c(c5c6c(c(O)c(OC)c5C[C@@H](O)C)C(=O)C=C(OC1)c6c24)c(C[C@@H](O)C)c(OC)c3O	234486	1	2.579	534.511
O1CC[NH+](CC1)C[C@H]1CC\C(=C/[C@@H](C)c2ccc(cc2)CC(C)C)\C1=O	639976	1	3.305	356.522
S1C2(SC(C(OC)=O)=C1C(OC)=O)C=1SS\C(=N/C(C)(C)C)\C=1SC(C(OC)=O)=C2C(OC)=O	717073	1	3.059	563.708
O(C)c1cc2c(C3=C(N(CCCN=[N+]=[N-])C2=O)c2c(cccc2)C3=O)cc1OC	732937	1	3.007	390.392
O=C([O-])CC\C(=N\Nc1ccc([N+](=O)[O-])cc1[N+](=O)[O-])\C	23935	0	-0.085	295.228
O=C1Nc2c(N(C1)C(=O)C[NH+](CCC)CCC)cccc2	138398	0	0.153	290.381
Clc1ccc(N2[C@@]3(O)[C@]4([C@@H](C(=O)C=C3)C(=O)N(c3ccccc3)C4=O)C(C(OCC)=O)=C2C)cc1	720991	1	3.386	492.908
O1c2c(cc3OCOc3c2)[C@@H]([C@@H](C)[C@H]1[NH+]1CCOCC1)c1cccc(OC)c1OC	666219	1	2.019	414.471
O=C([O-])C1(NC(=O)N)CCCC1	33394	0	-1.358	171.174
O=C1CC[C@@]2([C@@H]3[C@H]([C@@H]4CC[C@](O)([C@@H](O)COC(=O)C)[C@]4(C[C@@H]3O)C)CCC2=C1)C	82876	0	1.489	406.512
ClCCN(CCCl)c1ccc(cc1)CC(O[C@@H]1CC2=CC[C@H]3[C@@H]4CC[C@@H](C(=O)C)[C@]4(CC[C@@H]3[C@]2(CC1)C)C)=O	121209	0	7.195	574.621
O1[C@H](C[C@@](O)(c2c(n(nc2C)Cc2ccccc2)C)C1=O)CC#N	744472	0	1.58	325.362
O=C(N[O-])CC[NH3+]	111682	0	-3.241	104.108
Clc1cc(S\C(=N/Nc2ccc([N+](=O)[O-])cc2)\c2ccc(O)cc2)c(S(=O)(=O)N)cc1C	724875	1	5.187	492.956
O1c2c(CCC1(C)C)cccc2	63863	0	2.926	162.228
S(Sc1ccccc1N)c1ccccc1N	8186	0	3.045	248.367
[As](S[C@@H]1OC[C@H](O)[C@@H](O)[C@H]1O)(C)C	727221	1	-0.124	270.178
O[C@@H]([C@@H]([N+](=O)[O-])CC)c1ccccc1	16264	0	2.265	195.215
Clc1c2c(nc(nc2N)N)ccc1CNc1cc(Cl)c(Cl)cc1	208652	1	4.34	368.648
Oc1ccccc1\C=N\CCNc1c2c(ccc1)C(=O)c1c(C2=O)c(NCC\N=C\c2ccccc2O)ccc1	745501	1	5.278	532.589
S(CC(=O)Nc1cc(S(=O)(=O)N(C)C)ccc1)c1nc(O)c2c(nc(cc2C)C)n1	744263	0	2.315	447.531
O=C([O-])[C@@H]([C@@H](O)C1CCCC1)c1ccccc1	16458	0	1.153	233.283
O1[C@@H](C)[C@H](O)[C@H](O)[C@H](O)[C@@H]1O[C@H]1[C@@H](OC(=O)C)[C@@H](O)[C@@H](O[C@H]1OC(=O)[C@H]1CC[C@H]2[C@@H](O[C@@]3(OC[C@H](C)[C@@H](OC(=O)\C=C\c4ccccc4)C3)[C@]23OC3)C1)C	342443	1	1.235	762.794
Brc1cc(\C=N\[N-]C(=[NH2+])N)c(O)cc1	138368	0	1.37	257.087
Clc1cc(F)c(N2CC[NH+](CC2)CC(=C)c2ccc(cc2)C(=O)Nc2ccccc2N)cc1	735404	1	3.392	465.97
O=C1[C@](O)([C@@H]2[C@@H]3[C@](O)(C)C(=O)[C@](C=C3C)(C)[C@@]2(C=C1C)C)C	49641	0	1.51	304.381
Oc1cc(O)ccc1C(=O)C(=O)CCCCC	279895	0	2.997	236.264
[O-]c1[n+]([O-])cccc1	406972	0	-0.571	110.091
OCC[C@H](CC[C@H]1[C@]2([C@@H](CCC1=C)[C@](CCC2)(C(=O)[O-])C)C)CO	92229	0	2.115	337.474
S1[C@]2(SC=C1C(OC)=O)C=1SS\C(=N/c3ccccc3)\C=1SC=C2C(OC)=O	719738	1	3.534	467.625
S(C)c1cc(nc(c1)-c1ncccc1)-c1ncccc1	676944	1	3.67	279.36
Clc1cc2NC(N)=C(C(=O)c2cc1)c1ccccc1	746226	0	3.136	270.714
S(CCc1ccccc1)c1nc(nc2n(cnc12)CC(C)C)N	47783	0	3.923	327.447
Clc1ccc(cc1)-c1cc(nc(SC)c1C#N)-c1oc2c(c1)cccc2	745287	1	6.363	376.859
S=C(Nc1cc(OC)ccc1)Nc1ccc(O)cc1	201634	0	4.108	274.338
O=C([O-])Cc1ccc(cc1)C1CCCCC1	89393	0	2.211	217.284
O=C1C(=Cc2c(cc(cc2)C)C1=O)C	401130	1	2.68	186.207
O=C1NC(=O)N=CN1C1CCCCC1	76953	0	1.589	195.218
O1C(c2c(cccc2)C1=O)(C)C	5114	0	2.021	162.185
Clc1ccccc1N1N=C(C)\C(=C\c2c3c(n(S(=O)(=O)c4ccc(cc4)C)c2)cccc3)\C1=O	748435	0	5.836	489.973
O=C(C)c1cc([nH]c1C)C	40231	0	0.954	137.179
O(C)c1cc(NCCCCCNC(=[NH2+])NC(=[NH2+])NC(C)C)c2ncccc2c1	54849	1	2.503	387.522
O(C)c1c2c([nH]c3c2Cc2c(nc(nc2N)N)NC3=O)c(OC)cc1	689628	1	1.638	340.337
Oc1ccccc1\C=N\c1cccc(C)c1C	132528	0	4.156	225.286
[Pb+4]1(O[C-](O1)CSc1ccccc1)([C@H]1C=CC=C[CH-]1)([C@H]1C=CC=C[CH-]1)[C@H]1C=CC=C[CH-]1	628693	1	7.451	608.74
O(C(=O)[C@]1/2CCC[C@H](C=CC1)\C\2=N/Nc1ccccc1)CC	119606	0	3.873	298.379
Clc1ccc(-n2c3NC=NC(=S)c3nc2)cc1	19103	0	2.536	262.718
S(CC(C)C)c1nc(nc2n(cnc12)[C@@H]1O[C@H](CO)[C@@H](O)[C@H]1O)N	49815	0	0.374	355.413
O=C(C)C/1=CC=C\C\1=N/Nc1ccccc1	675371	1	2.361	212.247
O(C)c1cc2c(Nc3c(C2=N)c(NCCC[NH+](C)C)ccc3[N+](=O)[O-])cc1	658367	1	1.336	370.426
Clc1cc2nnc(nc2cc1)N	13204	0	1.788	180.594
O(C(=O)C)c1c2N(c3c(N(c2c(OC(=O)C)c2N(c4c(N(c12)C(=O)C)cccc4)C(=O)C)C(=O)C)cccc3)C(=O)C	646146	1	1.316	570.549
O(Cc1ccccc1)c1cc2N=C[C@H]3N(C/C(/C3)=C\C(=O)NCCCN3C(=O)c4c5c(cccc5ccc4)C3=O)C(=O)c2cc1OC	725981	1	3.868	628.673
Clc1cc(C(=O)[O-])c(O)c2c1cccc2	8472	0	1.316	221.617
O1c2c(cccc2)C(=O)C(O)=C1c1c(OC)cc(OC)cc1OC	78634	1	2.549	328.316
Ic1cc2c(C=3N(CCCN=[N+]=[N-])C(=O)c4cc([N+](=O)[O-])ccc4C=3C2=O)cc1	736202	1	3.513	501.234
FC1=CN([C@H]2O[C@H](CO)[C@H](OC(=O)C)C2)C(=O)NC1=O	407335	1	-1.396	288.229
O=C1N(N=Nc2c1cccc2)c1n(ncc1CC(=O)[O-])C	749544	0	0.373	284.25
S1C[N@@H+](CN(Cc2ccccc2)C1=S)Cc1ccccc1	150555	1	3.732	315.476
o1cccc1CN([C@@H](C(=O)NC(C)(C)C)c1ccccc1)C(=O)CNC(OC(C)(C)C)=O	746043	0	2.689	443.536
Oc1cc(ccc1)\C=N\NC(=O)CCCC(=O)N\N=C\c1cc(O)ccc1	106141	0	2.06	368.387
O=C(C\C(=N\[N-]C(=[NH2+])N)\c1ccccc1)c1ccccc1	69404	0	2.429	280.324
S(Cc1ccccc1F)c1ncnc2nc[nH]c12	18401	0	2.632	260.29
O=C([O-])c1ccc(N=Nc2c(nc(nc2N)N)N)cc1	408734	0	-0.065	272.243
O1CC2=C(C=C3N(Cc4c3nc3cc(ccc3c4)CO)C2=O)[C@@](O)(CC)C1=O	606173	1	1.141	378.378
O=C(NNC(=O)C)c1cc(ccc1)C(=O)[O-]	132323	0	-1.637	221.189
O(CC(O)COc1ccccc1)c1ccccc1	6802	0	2.935	244.286
Clc1ccc(OCCCC(=O)[O-])cc1C	102795	0	1.541	227.664
BrC1=C\C(\C=C(Br)C1=O)=C(/c1ccccc1C(OCC)=O)\c1cc(Br)c(O)c(Br)c1	16214	0	6.601	661.96
Brc1ccc(cc1)C(=O)c1ccc(OC)c(OC)c1OC	46673	0	3.933	351.192
O1c2c(OC1)cc1[C@H]3N(C)C(=O)c4cc([N+](=O)[O-])ccc4[C@H]3C(=O)c1c2	730009	1	1.857	352.298
O(C)c1cc2N([C@@H]3[C@@]4([C@H]5[N@H+](CC=C[C@@]5(CC)[C@H](OC(=O)C)[C@]3(O)C(OC)=O)CC4)c2cc1[C@@]1(CCCCCc2c1[nH]c1c2cccc1)C(OC)=O)C	292440	1	4.244	712.851
Clc1ccccc1\C=N\NC(=O)c1ccc(nc1Nc1cc(Cl)ccc1OC)C(F)(F)F	743911	1	6.305	483.271
O1[C@@H]2Oc3c4c(C(=O)c5c(cc6c([C@@H](OC)C[C@](O)(C)[C@@H]6C(OC)=O)c5O)C4=O)c(O)cc3[C@]1(C)[C@H](O)[C@@H]([NH+](C)C)[C@@H]2O	102815	1	-1.023	600.59
[NH+](CCC(CC[NH+](C)C)c1ncccc1)(C)C	42811	0	-1.213	237.384
[NH+](CC/C(=N\Nc1ccccc1)/C=C/c1ccccc1)(C)C	629912	1	2.581	294.414
Clc1ccccc1[C@@](O)(CC[NH+](C)C)c1ccccc1	113595	0	1.998	290.808
O1C[C@H]2[C@@H]([C@@H](c3c(cc4OCOc4c3)[C@H]2[NH2+]Cc2ccc(cc2)C#N)c2cc(OC)c(O)c(OC)c2)C1=O	642284	1	2.26	515.534
S=C1N=C(Nc2n(cnc12)CCC)N	40669	0	1.037	209.271
O1C=C(CC[C@]1(\C=N\CC(C)=C)C)C	40817	0	2.488	193.285
Brc1ccc(cc1)C(=O)\C=C\c1ccccc1	28483	0	4.45	287.151
O1c2c(OC1)cc1c(c3[n+](cc4c(c3cc1)ccc(OC)c4OC)C)c2	36405	1	4.186	348.372
S=C1N(C(=O)[C@@H](CN1Cc1occc1)C)c1ccccc1	47796	0	3.727	300.375
O1[C@H](CO)[C@@H](O)[C@@H](O)[C@@H]1n1c2ncncc2nc1	65423	1	-1.673	252.227
o1cccc1\C=C(/C#N)\c1ccc([N+](=O)[O-])cc1	176298	0	2.944	240.214
s1c(C(=O)c2ccccc2F)c(nc1Nc1cccnc1)N	747885	1	2.92	314.337
O=C1c2cc(ccc2NC1=O)C	9398	0	1.156	161.157
O=C(N)C1([NH2+]C)CC[NH2+]CC1	75846	0	-4.179	159.229
S=C(NC1CCCCC1)[N-]\N=C(/C)\c1[nH]c2ncccc2n1	674101	1	3.532	315.417
Clc1cc2c(C\C(=C/c3cc(OCC(=O)Nc4sc5c(n4)cccc5)ccc3)\C2=O)cc1	745187	0	5.716	460.932
ClC(Cl)C(c1ccc(F)cc1)c1ccc(F)cc1	63886	0	4.828	287.132
O=C(Nc1ccccc1)c1ccc([N+](=O)[O-])cc1	405515	0	2.509	242.23
Clc1ccccc1NC(=S)[N-]\N=C/1\c2c(NC\1=O)cccc2	668497	1	4.323	329.784
S=C(Nc1ccccc1)NCCC	131982	0	3.384	194.297
O[C@H]1CC2=CC[C@H]3[C@@H](CC[C@]4([C@H]3C[C@@H]3C4=NN=C3)C)[C@@]2(CC1)C	64998	0	3.282	312.449
FC(F)(F)C(O)(C\C=N\Nc1ccc([N+](=O)[O-])cc1[N+](=O)[O-])C(F)(F)F	659195	1	2.941	390.195
O=C1C=C2NC(=O)/C(=C/C=C/[C@H](OC)[C@@H](OC(=O)N)/C(=C/[C@@H](C)[C@@H](O)[C@@H](OC)C[C@H](CC(=C1[O-])C2=O)C)/C)/C	255104	1	1.431	545.601
S(C)c1ccc(cc1)-c1n2C=CC=Nc2nc1-c1ccc(OC)cc1	722170	1	4.604	347.433
O(C)c1ccc(cc1)-c1cc(nc(c1)-c1ccccc1)-c1cc([N+](=O)[O-])ccc1	246997	0	5.969	382.411
Clc1cc(nc2c1cc(S(F)(=O)=O)cc2)-c1cc(Sc2ccccc2)ccc1	158413	0	6.368	429.915
N(=C\CCC)/c1ccccc1	5173	0	2.777	147.217
OC=1NC(=O)C=CC=1	71877	0	0.115	111.099
O(C(=O)Nc1[nH]c2c(n1)cc(cc2)C(=O)c1[nH]ccc1)C	600472	1	2.44	284.27
O=C1C2=C[C@H](CCC(=O)[C@]3([C@H](C[C@@H]2O)C(C)(C)[C@@H](OC(=O)C)CC3)C)C1=C	302979	1	2.802	374.471
O=C(Nc1c(C)c([N+](=O)[O-])ccc1C)C	11344	0	1.817	208.214
[nH+]1c2c(cccc2C)c(N)c2c1nc(cc2C)C	749171	1	3.185	238.308
[N@@+]1(C[C@H]2[C@H](C1)C[N@@H+](CC2)Cc1ccccc1)(Cc1ccccc1)CCCCCCCCCCC	661832	1	5.239	462.753
O=C([O-])C1(NC(=O)CNC(=O)C[NH3+])CCCC1	80130	0	-4.054	243.26
S=C([S-])Cc1[n+](c2c(cc(cc2)C)cc1)C	273908	0	4.657	247.379
O=C1Nc2c(N[C@@H](C1)C)cccc2	36330	0	1.07	176.215
O=C1NC(C(=O)NN)=C([O-])c2c1c(nc(c2)-c1ccccc1)C	745975	0	-0.695	309.299
S1c2cc(N(C)C)ccc2N(c2c1cc(N(C)C)cc2)C(=O)c1ccccc1	11881	0	5.01	389.513
O1CCN(CC1)C=1NC(=N/C(/N=1)=N\NC(=O)c1ccccc1)N1CCOCC1	99865	0	0.096	385.42
O=C(C)c1ccc(cc1C)C	15333	0	2.542	148.202
O=C1c2c(C(=O)c3c1cccc3)c(NCC[NH3+])c1n(ccc1c2NCC[NH3+])C	726434	1	-0.743	379.456
Clc1ccccc1\C=N\NC(=O)c1c2c(ccc1)cccc2	115968	0	4.256	308.762
Clc1ncnc2n(cnc12)[C@H]1O[C@@H](COc2ccc(cc2)C)[C@H](Oc2ccc(cc2)C)C1	685827	1	5.282	450.917
[n+]1(c2c(n(c1)C)cccc2)C	27984	0	2.756	147.197
n12c(nnc1C)C=C(C=C2C)C	79010	0	1.35	161.204
s1c2c(cc1C1([NH2+]CCC[NH2+]C)CCCCC1)cccc2	708074	1	1.439	304.493
O1[C@H](CC=CC1=O)\C=C\C(=C/[C@@H](C\C=C\C(=C\[C@H](C(=O)[C@H]([C@H](O)[C@H](CC)C)C)C)\C)C)\CC	708248	1	7.13	456.657
S1C=C2N3C(=NC(=O)C2)C=C(O)N=C13	336872	0	0.464	207.209
S=P(NC1CCCCC1)(N1CC1)N1CC1	64347	0	1.072	245.325
s1c2c(cc1[N+](=O)[O-])C(=O)c1scc([N+](=O)[O-])c1C2=O	681823	1	2.628	310.263
Fc1ccc(cc1)C(O[C@H]1[C@H]2[C@@](C)([C@@H](O)C[C@H]3OC[C@@]23OC(=O)C)C(=O)[C@H](OC(=O)C)C=2C(C)(C)[C@@]1(O)C[C@H](OC(=O)[C@H](O)[C@@H](NC(=O)c1ccccc1)c1ccccc1)C=2C)=O	673188	1	3.26	871.897
S=C1NC2=C(NC(=NC2=O)N)N1	29188	0	-0.421	183.191
O1c2c(OC1)cc1N[C@H](CC(=O)c1c2)c1cc(OC)ccc1	700265	1	2.676	297.305
O=C(c1ccc(cc1)-c1ccccc1)c1ccccc1	97365	0	4.752	258.314
[O-][N@@H+](c1ccccc1)[CH-]c1ccc(cc1)C	89323	0	3.571	212.267
S1(=O)(=O)C[C@H](NC(=O)c2ccc(cc2)C(=O)c2ccccc2)CC1	746413	0	1.949	343.397
O1[C@@H]2[C@H](O[C@@H]([C@@H]2O)c2ccccc2)C=CC1=O	383482	1	1.234	232.232
o1c2c(nc1-c1cc(O)c(cc1O)-c1oc3c(n1)cccc3)cccc2	746361	0	4.247	344.32
S(=O)(\C=C/C(=O)N(Cc1ccccc1)C(C)(C)C)c1ccccc1	705331	1	3.189	341.467
S(=O)(=O)(NCC)c1ccccc1	3547	0	1.089	185.243
O1C(=C\C(=C\c2cc([N+](=O)[O-])ccc2)\C1=O)c1ccc(cc1)-c1ccccc1	745550	0	4.963	369.37
Clc1cc(ccc1Cl)\C=C\1/N=C(NC/1=O)Nc1cc(Cl)ccc1	716496	1	4.567	366.629
ClC[C@H]1c2c3c(cc(NC(=O)C)cc3)c(O)cc2N(C1)C(=O)CCCCCC(=O)N1C[C@H](c2c3c(cc(NC(=O)C)cc3)c(O)cc12)CCl	711947	1	4.061	705.627
O=[N+]([O-])c1cc(-n2nnnc2N)ccc1	25412	0	0.406	206.162
BrC([C@@H](Br)CC[C@@](Cl)(C(Cl)=C)CBr)(C)C	665533	1	5.399	445.844
O1[C@H]2[C@]34[C@@H]([C@@H](OC(=O)C\C=C\CCCCCCCC)C1=O)C(=C)[C@@H](O)[C@@](OC3)(O)[C@@H]4[C@@]1([C@@H](C2)C(=CC(=O)[C@@H]1O)C)C	368671	1	3.696	572.686
[Fe+]12345(C6=C1[C@@]2(/C(=C(/c1ccc(O)cc1)\c1ccc(O)cc1)/CC)[C@-]3[C-]46)c1c5cc[cH-]1	748141	1	4.551	418.265
ClC=1N=C2N(C=CC=C2)C(=O)C=1	10546	0	0.777	180.591
S(=O)(=O)([O-])c1ccc(N\N=C(\C(=O)N)/C#N)cc1	176297	0	-1.984	267.241
O=C(N[C@@H](CCC(=O)[O-])C(=O)[O-])c1ccc(N(Cc2nc3c(nc(nc3N)N)nc2)C)cc1	117356	1	-2.834	452.423
O(c1cc2c3c([nH]c2cc1)c(c1c(c[n+](cc1)C)c3C)C)c1ccccc1	650269	1	6.368	353.436
O=C(NC(C#N)(C)C)C	35383	0	-0.1	126.156
Cl[C@]12CC=CC(=O)[C@@]1([C@@H]1[C@H]([C@@]34OC[C@@H]5[C@@]6([C@@H]([C@@]7(O3)[C@@](O)(CC1)C(O[C@]7([C@H](OC5=O)C6)C)=O)C4=O)C)C[C@H]2O)C	688074	1	0.715	562.993
O=C1N(Cc2ccccc2)C(=O)c2c1c1c3c([nH]c1c1[nH]c4c(c12)cccc4)cccc3	628440	1	5.432	415.443
O1C2=C([C@@H](c3c(OC1(C)C)cc1OCOc1c3)c1cc(OC)c(O)c(OC)c1)C(OC2)=O	669382	1	2.689	442.415
O(C(=O)c1ccccc1C(OCCCC)=O)CCCCCCCCCC	16200	0	6.935	362.503
Oc1cc2c(c3c4c([nH]c3cc2)c(cnc4NCCC[NH+](C)C)C)cc1	645008	1	2.313	349.449
Clc1cc2N[C@](N(S(=O)(=O)c2cc1Cl)O)(CC(OC)=O)C(OC)=O	163639	0	1.763	399.204
O1CC[NH+](CC1)Cc1cccc(O)c1O	85468	0	-0.454	210.25
Clc1cc(NC(=S)[N-]\N=C(/C)\c2nc(ccc2)/C(=N/[N-]C(=S)Nc2cc(Cl)ccc2)/C)ccc1	668484	1	8.322	528.48
O(CC)c1ccccc1\C=N\N1CCCCCC1	82000	0	3.269	246.348
O1[C@@H](CC[C@H]1C(=O)[O-])C(=O)[O-]	40743	0	-3.203	158.109
O=C1N2[C@@H](C\C(\C2)=C/C(=O)NCCCCCNC(=O)\C=C\2/C[C@@H]3N(C/2)C(=O)c2c(N=C3)cccc2)C=Nc2c1cccc2	709362	1	2.248	578.661
O1[C@H](CO)[C@H](O)[C@H](O)[C@@H](O[C@H]2O[C@H](CO)[C@H](O)[C@H](O)[C@H]2O)[C@H]1O[C@@H]1[C@H](O)[C@@H](O)[C@H](O[C@@H]1CO)O[C@H]1CC[C@]2([C@H](C1)CC[C@@H]1[C@@H]2CC[C@@]2([C@H]3[C@H](O[C@@]4(OC[C@@H](CC4)C)[C@H]3C)C[C@@H]12)C)C	714603	1	-0.357	903.058
O1[C@H]2[C@@H](OC1(C)C)O[C@H](COCC[NH+]1CCCC1)[C@@H]2OCCCCCCCCCCCC	665661	1	3.566	456.679
s1cccc1CCN1[C@H](SCC1=O)c1ccc(OC)cc1	749386	0	3.218	319.442
Clc1ccc(NC(P(=O)([O-])c2ccccc2)=O)cc1	2678	0	1.733	294.65
O[C@]1(CC[C@H]2[C@H]3[C@H](CC[C@]12C)[C@@]1(C(=C/C(=N\OCC[NH+](CC)CC)/CC1)CC3)C)C#C	701573	1	3.903	427.643
s1c(cnc1N)C(OC)=O	42123	0	0.227	158.178
O(C(=O)C)c1c(c2c(cc1OC(=O)C)c(OC(=O)C)c(-c1c(cc3c(cc(OC(=O)C)c(OC(=O)C)c3C(C)C)c1OC(=O)C)C)c(c2)C)C(C)C	732805	1	7.132	714.754
O1CCN(CC1)C(=O)C1CC[NH+](CC1)CCc1ccccc1	22788	0	0.237	303.419
O1C\C(=C/c2ccc(O)cc2)\C(=O)c2cc(ccc12)-c1ccccc1	744999	1	4.675	328.361
OC=1C(=O)C=CN(CCc2c3c([nH]c2)cccc3)C=1C	721124	1	2.059	268.31
O=C1c2c3n(-c4c1cccc4)cnc3ccc2NCCC[N@@H+](CCCN1C(=O)c2cc([N+](=O)[O-])cc3c2c(ccc3)C1=O)C	695941	1	2.697	589.621
O1C(=CC=CC1=O)C#CC#C\C=C\CO	730869	1	1.597	200.19
O=C(N=Nc1ccc([N+](=O)[O-])cc1[N+](=O)[O-])[N-]Nc1ccc([N+](=O)[O-])cc1[N+](=O)[O-]	671337	1	3.682	419.243
S=C([N-]C(OCC)=O)c1[nH]ccc1	247000	0	2.202	197.234
O(C[C@H]1[C@@H](CCC[C@H]1C)COC(=O)C)C(=O)C	557	0	1.934	242.311
O(C(=O)CCC(Oc1ccc(cc1C)C)=O)c1ccc(cc1C)C	17500	0	5.19	326.386
Clc1cc2c(C\C(=C/c3ccc(OCC(=O)Nc4sc(C(OCC)=O)c(n4)C)cc3)\C2=O)cc1	745192	0	4.866	496.963
O1[C@H](CC(OC)=CC1=O)c1ccc(OC)cc1	23873	0	1.734	234.248
Clc1cc-2c(cc1NC(=O)C)Cc1c-2cccc1	70206	0	3.277	257.715
S(C[C@@H](C[NH+](C)C)C)C1=NC=2N(c3ccccc3)C(=S)N(C(=S)C=2C(=N)N1c1ccccc1)c1ccccc1	703448	1	7.36	571.802
FC(F)(F)c1ccccc1NC(=O)CCC(=O)N\N=C\1/[C@@H](Oc2c(cccc2)/C/1=N/NC(=O)CCC(=O)Nc1ccccc1C(F)(F)F)c1cc2OCOc2cc1	641210	1	5.347	796.671
Clc1nc(Cl)nc2ncn(c12)[C@H]1O[C@@H](COc2ccc(cc2)C)[C@H](Oc2ccc(cc2)C)C1	685833	1	6.134	485.362
OCCNc1cc(C(=O)[O-])c(NCCO)cc1C(=O)[O-]	329204	0	-3.32	282.249
O=C1C2=C([C@@]3([C@@H]([C@H](O)[C@H]2OC=O)C(CCC3)(C)C)C)C(=O)C([O-])=C1C(C)C	337581	1	2.042	375.435
O(C)c1c(OC)cc(cc1OC)[C@@H]1N(N=C(C1)c1ccc(OC)cc1)C(=O)C	748402	0	2.686	384.426
o1cccc1\C=C\C(=O)c1ccccc1	2049	0	3.097	198.217
ClC=1[C@]2(Cl)[C@@H](OC(=O)C)C[C@](Cl)(C=1Cl)C2(Cl)Cl	18244	0	3.142	358.861
O1[C@H]2[C@@H]([C@H](OC(=O)\C(=C\C)\C)C[C@]3(O[C@H]3[C@@H]3O[C@H]3C(=C)[C@@H]2O)C)C(=C)C1=O	354437	1	1.413	376.4
O=C1NC(=O)N(C=C1c1ccccc1)CCCc1ccccc1	107558	0	3.033	306.358
o1ncc2CCc3c(-c12)cn(c3)Cc1ccc(OC)cc1	748254	1	3.561	280.321
O(CCCCCn1c2c(c3c1cccc3)cccc2)c1cc2N=C[C@H]3N(CCC3)C(=O)c2cc1OC	744990	1	5.764	481.585
BrCc1cc2c(cc3c(c2)C(=O)C=CC3=O)cc1	727286	1	3.41	301.135
O=C1N(NC(=O)CNc2ccc([N+](=O)[O-])cc2)C(=Nc2c1cccc2)c1ccccc1	657349	1	3.087	415.401
FC(F)(F)c1cc([N+](=O)[O-])c(C#N)c([N+](=O)[O-])c1	622626	1	2.44	261.114
S=C1N(CCN1\C=C(/C(=O)C)\C(OC)=O)C(=O)c1occc1	729527	1	1.413	322.336
Fc1ccc(N[C@H]2[C@@H]3[C@@H]([C@H](c4c2cc2OCOc2c4)c2cc(OC)c(O)c(OC)c2)C(OC3)=O)cc1	628679	1	4.088	493.48
Cl\C(=C/Cl)\C(=O)[O-]	32684	0	-0.558	139.945
O=C(c1ccc(N)cc1)c1ccc(N)cc1	6096	0	1.74	212.247
Fc1cc2c(C=3N(CCCN=[N+]=[N-])C(=O)c4cc([N+](=O)[O-])ccc4C=3C2=O)cc1	736201	1	3.14	393.328
O=C(Nc1cc[nH+]cc1)NC	149987	0	0.345	152.174
ClC=1C=Cc2n(c3c(n2)-c2c(cccc2)C(=O)C3=O)C=1	742544	1	3.07	282.681
S(=O)(=O)(Nc1ccccc1)c1cc(ccc1)\C=C\C(=O)N[O-]	726630	1	1.097	317.34
O(C)c1ccc(cc1)Cc1ccccc1C(=O)[O-]	4579	0	1.943	241.262
Brc1ccc(cc1)C=1N(C=O)C(=O)C(C#N)=C(C=1)c1n(ccc1)C	746899	0	2.992	382.211
O1CC(=O)c2c1cc(OC)c(O)c2OC	88962	0	0.964	210.183
ClCC[NH+](CCCl)C	762	1	0.089	157.061
S=C(N)[N-]\N=C(/C)\c1ccc(Oc2ccccc2)cc1	625223	1	3.832	284.356
O(C)C1=CC(=O)C(=CC1=O)C	3071	0	0.822	152.147
FC([N+](=O)[O-])([N+](=O)[O-])C[NH+](CC(F)([N+](=O)[O-])[N+](=O)[O-])COC[NH+](CC(F)([N+](=O)[O-])[N+](=O)[O-])CC(F)([N+](=O)[O-])[N+](=O)[O-]	683257	1	1.889	622.269
Oc1ccccc1C(=O)C	44452	0	1.327	136.148
O=C1C[C@@H](C)[C@@H](c2c1cccc2)C	5682	0	2.854	174.239
ClC=1[C@]2(Cl)[C@@H](C(=O)[O-])[C@@H](C(OCC=C)=O)[C@](Cl)(C=1Cl)C2(Cl)Cl	12447	0	1.861	427.9
[U+7]123(O[C-]([N-][N@H+]1[CH-]c1c(O2)c(OC)ccc1)c1ccncc1)(Oc1c(cccc1OC)[CH-][N@@H+]3[N-][C-](O)c1ccncc1)([O-])[O-]	638315	1	0.242	813.578
OCCCCCCCCCCCCCCCCCC	5379	0	7.357	270.494
O(C(=O)[C@@]1(C2c3c(C(c4c2cccc4)[C@H]1C(OC)=O)cccc3)C)C	27933	0	3.318	336.381
S(c1ccc(N)cc1S(=O)(=O)[O-])c1ccc(N)cc1S(=O)(=O)[O-]	7838	0	-3.369	374.413
n1ccc(cc1)\C=C/1\c2c(-c3c\1cccc3)cccc2	83319	1	3.832	255.313
Clc1cc(ccc1Cl)\C=C(\[N+](=O)[O-])/C	3941	1	3.652	232.063
O=C1C2=C(N(CCC[NH3+])C(=O)c3cc([N+](=O)[O-])ccc23)c2c1cc(cc2)-c1ccccc1	737671	1	1.856	426.444
SC=1C(=O)NC(=NC=1NCCC)C	745293	0	0.401	199.273
S=C1NC(=O)/C(/N1)=C\c1cc2CCCc2cc1	119909	0	2.887	244.312
O1CO[C@@H]2[C@H](OCO[C@H]2CO)[C@H]1CO	1388	0	-1.705	206.193
[NH2+](C)C1(CCCCC1)C#N	5660	0	0.211	139.218
O=[N+]([O-])c1c2c([nH+]c3c(cccc3)c2NCCC[N+]([O-])(C)C)c(cc1)C	652884	1	3.211	355.411
O1CCN(CC1)c1ccc(cc1)C(=O)c1ccccc1	111168	0	3.084	267.322
O1Cc2c(cccc2)[C@@H]1[C@H](C(=O)c1cc2c(cc1)cccc2)C(=O)C(=O)Nc1ccc([N+](=O)[O-])cc1C#N	641229	1	4.239	505.478
Clc1ccc(cc1)C=1NC(=O)N(C=1)c1ccc(N2C=C(NC2=O)c2ccc(Cl)cc2)cc1	747362	0	3.742	463.315
O=C1CC[C@@H]2[C@H](CC[C@]3([C@H]2CC[C@@]3(O)C)C)[C@]1(CCC(=O)[O-])C	33230	0	1.296	321.431
BrCCCCCCCC(OCC)=O	100182	0	3.441	251.161
S1CCCN(CC)C1=S	122628	0	2.434	161.288
O=C1CC[C@@]2([C@@H]3[C@H]([C@H]4C(CC3)=C(CC4)C)CCC2=C1)C	50919	0	4.565	270.409
O1c2c(C=C([N+](=O)[O-])[C@H]1c1cc(OC)c(OC)cc1)cccc2OC	667471	1	3.34	343.331
O1C[C@@H]2[C@@H](C[C@@H]3[N@@H+]([C@H]2Cc2c4c(n(c23)C)cccc4)C)[C@H](Cc2cc3c4C[C@@H]5[N@H+]([C@H](c4n(c3cc2OC)C)C[C@@H]2[C@H]5COC=C2C(=O)C)C)[C@]1(OC(=O)C)C	719263	1	2.149	748.949
S=C(Nc1ccccc1C)[N-]N	97210	0	2.721	180.25
S(c1n(cnc1[N+](=O)[O-])C)c1nc(nc2n(cnc12)[C@@H]1O[C@H](CO)[C@@H](O)[C@H]1O)N	40665	1	-0.59	424.392
Fc1ccc(cc1)C(=O)CC[N@H+]1CC[C@@H]2CC[C@@H](C2)C1	95502	0	2.041	276.369
O([C@@H](C(=O)N(C)C)C)c1ccccc1-c1ccccc1	310470	0	3.081	269.338
Clc1cc2N3C(Sc2cc1Cl)=Nc1nn2c([NH+]=C(N)C(C#N)=C2SC)c1C3=N	748772	0	4.508	448.332
Clc1c2c(cccc2)c(c2c1cccc2)\C=N/NC(NO)=N	625733	1	3.357	312.754
Oc1c2ncccc2ccc1[C@H](Nc1ccc([N+](=O)[O-])cc1)c1ccccc1	1010	1	4.673	371.389
O(C)c1ccc(cc1)[C@@H](C1=C(C)C(=O)c2c(cccc2)C1=O)C=1C=CC(=CC(=O)C=1O)C(C)C	624407	1	5.433	454.514
O1[C@@H]/2[C@@H]([C@@H](OC(=O)C(C)=C)C[C@@]3(O[C@@H]3C[C@H](OC(=O)C)/C(=C\2)/C)C)C(=C)C1=O	251667	1	2.109	390.427
[P+](CCN1Cc2c(C1)cccc2)(c1ccccc1)(c1ccccc1)c1ccccc1	281625	1	6.614	408.494
Clc1ccccc1\C=N\NC(=O)c1ccccc1Nc1cc([nH+]cc1)C(F)(F)F	743921	1	5.53	419.808
S1CCN(C(C)C)C1=S	43637	0	2.749	161.288
Oc1c2cc(O)cc1NC(=O)/C(=C/C=C\[C@H](C)[C@H](OC(=O)N)/C(=C\[C@H](C)[C@H](OC)[C@@H](OC)C[C@H](C)[C@H]2OC)/C)/C	330500	1	4.191	560.679
S1[C@H](c2c(n(nc2C)C(=O)c2ccccc2O)NC1=N)c1ccccc1	657989	1	3.835	364.421
P(Oc1ccccc1)(Oc1ccccc1)(Oc1c2c([nH]c1)cccc2)=O	719332	1	5.231	365.319
n1nn(c2CCCCCCc12)-c1cc2CCCCCCc2cc1-n1nnc2CCCCCCc12	633670	1	8.379	458.642
O(C)c1ccc(cc1)[C@@H](OC)[C@]1(N=C(N)N(C)C1=O)Cc1ccc(O)cc1	748453	0	2.326	369.414
O=C1NC(=O)N[C@@]12C=C([C@](O)(C2)c1ccccc1)c1ccccc1	32852	0	1.694	320.342
Clc1[nH]c2c(cc(OC)c(c2)C)c1\C=C\1/c2c(NC/1=O)c1c(cc2)cccc1	730291	1	4.861	388.846
S(=O)(=O)([O-])c1cc(N)ccc1Nc1ccc(cc1)C	7572	0	0.207	277.319
Br[C@@H](CN(C[C@H](Br)C)c1cc(C)c(N=Nc2ccccc2C(=O)[O-])cc1)C	240419	1	5.378	496.216
O1C[C@H]2[C@@H]([C@H](c3c(cc4OCOc4c3)[C@H]2[NH2+]C2CCN(CC2)C(OCC)=O)c2cc(OC)c(O)c(OC)c2)C1=O	653864	1	1.16	555.596
[nH]1c2nc(nc(NCc3ccccc3)c2cc1)C	106570	0	2.43	238.288
Brc1c2c(nccc2)c(N)cc1OC	54783	0	2.001	253.095
FC([N+](=O)[O-])([N+](=O)[O-])CN(CC(F)([N+](=O)[O-])[N+](=O)[O-])C(=O)NCC(F)([N+](=O)[O-])[N+](=O)[O-]	677413	1	3.114	468.171
S1[C@H](c2c(n(nc2C)C(=O)c2ccccc2O)NC1=N)c1cc(OC)c(OC)cc1	657997	1	3.802	424.473
O1Cc2c(c(c3Oc4c(Oc3c2C)cccc4)CCCC)C1=O	707690	1	5.07	310.344
Brc1n(c2ncnc(N)c2c1C#N)[C@@H]1O[C@H](CO)[C@@H](O)[C@@H]1O	113951	1	-0.656	370.159
[nH]1c2c(c3c1nc1c(cncc1)c3C)cncc2	722423	1	1.893	234.256
O=C1C=C2CC[C@H]3[C@@H]4CC[C@@H](C(=O)CO)[C@]4(CC[C@@H]3[C@]2(C=C1)C)C	19978	0	3.165	328.445
Clc1ccccc1OC[C@@H](O)C[NH+]1CCN(CC1)c1cc(Cl)ccc1	91339	0	2.839	382.304
O1c2c(OC1)cc1c(c2)C(=O)C2=C1N(CCC[NH2+]CC[NH2+]CCC[NH3+])C(=O)c1cc(OC)c(OC)cc12	724059	1	-3.014	511.59
O=C1NC(=CC=C1C#N)CC(=O)c1ccccc1	79437	0	1.184	238.241
o1c2c(cc1-c1ccncc1)cccc2	85430	0	2.792	195.217
Brc1cc(Br)cc(\C=C(\C(=O)N)/C#N)c1O	125401	0	2.393	345.975
O=C1NC(c2ccccc2)(c2ccccc2)C(=N1)N	102071	0	2.159	251.283
S(=O)(=O)(N1[C@@H](Cc2n(nc(C(OC)=O)c2C(OC)=O)[C@H]1C)c1ccccc1)c1ccccc1	746992	0	3.236	469.51
Clc1cc(NC2(CCCC2)C#N)ccc1	43102	0	3.505	220.698
P(OCC)(OCC)(=O)[C@H]([NH2+]C(c1ccccc1)c1ccccc1)c1ccc(cc1)C(C)C	732918	1	4.738	452.545
Clc1nc(nc(Oc2ccccc2)n1)-c1c2c(n(c1)-c1ccccc1)cccc2	142335	1	6.578	398.844
Clc1n(cnc1[N+](=O)[O-])C	7852	0	0.815	161.546
O=C1c2c(nccc2\C=C\N(C)C)C(=O)c2c1cccc2	686556	1	2.095	278.305
O=C1NC(=O)N(c2nc(n(c12)C)N)C	14280	0	-0.511	195.179
S1C=Cn2c1nc(C)c2CO	332683	0	0.194	168.216
Fc1cc(c2c(c1)cccc2)[C@@H](C)c1ccccc1C(=O)[O-]	74898	0	3.326	293.312
OC(CC(=O)Nc1ncccc1)(c1ccccc1)c1ccccc1	114725	0	2.967	318.369
O=C(N[C@@H](CC(C)C)C(=O)[O-])[C@H](O)[C@@H]([NH3+])Cc1ccccc1	265489	0	-1.34	308.373
O(C)c1cc2c(C=3N(CCC[NH+](C)C)C(=O)c4c(C=3C2=O)cccc4)cc1	740647	1	0.839	363.43
O=C([O-])C([NH3+])C(=O)[O-]	352096	0	-5.289	118.068
Clc1ccc(SC)cc1C(=O)Nc1sccc1C(=O)N	745698	0	2.609	326.822
S(=O)(=O)(c1ccc(NO)cc1)c1ccc(N)cc1	742234	0	1.966	264.3
Oc1cc(ccc1O)\C=C\C(=O)[C@H]1CC[C@]2([C@@H](CC[C@@]3([C@@H]2CC[C@@H]2[C@@H]4[C@@](CC[C@]23C)(CC[C@H]4C(C)=C)C(=O)[O-])C)C1(C)C)C	681466	1	7.107	601.835
O1CCCC[C@H]1n1ncc2c1ncnc2NCCC	46614	0	2.047	261.323
FC(F)(F)COc1cc2c3c([nH]c2cc1)c(c1c(c[n+](cc1)C)c3C)C	650260	1	5.799	359.365
OC1(CCCCC1)C[N+](=O)[O-]	404582	0	1.466	159.183
O1Cc2c(cc(OC)c(OC)c2)C1=O	25379	0	1.406	194.184
O(C(=O)C)c1ccccc1C(=O)C1c2c(C(=O)c3c1cccc3O)c(O)ccc2	641172	1	3.621	388.37
O(C)c1cc(ccc1OC)CC(=O)N1CCc2cc(OC)c(OC)cc2[C@H]1O	194248	0	2.531	387.426
Clc1cc([N+](=O)[O-])c(cc1)CN1C(=O)c2c(cccc2)C1=O	337829	0	3.004	316.696
P(OCC)(OCC)(=O)NC1CCCCC1	100749	0	1.743	235.26
O(C)C1=CC(=O)N(C(=O)[C@@H](OC(=O)[C@H]2N(CCC2)C(=O)[C@H]2N(CCC2)C(=O)[C@@H](N(C(=O)[C@@H](NC(=O)[C@@H]([NH+](C)C)C(C)C)C(C)C)C)C(C)C)C(C)C)[C@@H]1Cc1ccccc1	617668	1	2.863	838.064
ClC[C@H]1c2c3c(cccc3)c(O)cc2N(C1)C(=O)c1[nH]c2c(cc(OC)c(OC)c2OC)c1	698103	1	4.401	466.914
O1[C@@H]2[C@H](CC[C@@H]([C@@H]3C=CC(=O)[C@@]23C)C)C(=C)C1=O	85235	1	2.671	246.302
Sc1[nH]c2cc(N)ccc2n1	3984	0	1.5	165.216
O1[C@H]2N(c3c(N[C@@H]2C(C(O[C@H]2C[C@@H]4CC[C@@]2(C)C4(C)C)=O)=C1C)cccc3)C	695643	1	4.319	382.496
O(CC[NH+]1CC[NH2+]CC1)c1ccccc1	31326	0	-1.418	208.3
S(CC(=O)[O-])c1ccc(N)cc1	43555	0	-0.368	182.22
Clc1ccc(cc1)/C(=C(\Cl)/c1cc(OC)c(OC)cc1)/C=O	618116	1	4.428	337.197
Oc1c(O)c(c2c(C(=O)C(C)=C(C3=C(C)C(=O)c4c(C3=O)c(C=O)c(O)c(O)c4C(C)C)C2=O)c1C(C)C)C=O	651924	1	4.956	546.521
O1[C@H](C)[C@@H](O)[C@@H]([NH3+])C[C@@H]1O[C@@H]1c2c(C[C@H](O)C1)c(O)c1c(C(=O)c3c(cccc3OC)C1=O)c2O	268708	1	-0.029	486.491
O=C(C1CC1)c1cc(C)c(cc1)C	71983	0	3.3	174.239
O=C1c2c(C(=O)c3c1cccc3)c(NCCC[NH2+]CCO)ccc2NCCC[NH2+]CCO	278467	1	-1.784	442.551
O=C([O-])c1cc([N+](=O)[O-])c(C)c([N+](=O)[O-])c1	5589	0	0.26	225.135
[se]1c(ccc1-c1[se]c(cc1)CO)-c1n(C)c(cc1)CO	711172	1	1.694	399.205
O(C)c1c(OC)cc(cc1OC)-c1nn[nH]c1-c1nccnc1	749188	0	1.641	313.311
Clc1ccccc1[C@H]([NH+](C)C)c1ccccc1C	31921	0	3.105	260.782
S(SC)c1ccccc1	87076	0	2.962	156.268
[N+]1(CCN(CC1)c1ccccc1)(C)C	89754	0	0.594	191.293
O1[C@H](CO)[C@H](O[C@@H]2O[C@@H](CO)[C@@H](O)[C@H]2O)[C@H](O)[C@H](O[C@H]2O[C@H](C)[C@H](O)[C@H](O)[C@@H]2O)[C@H]1O[C@@H]1CC2=CC[C@@H]3[C@H](CC[C@@]4([C@@H]5[C@@H](O[C@@]6(OC[C@@H](CC6)C)[C@H]5C)C[C@@H]34)C)[C@]2(CC1)C	706804	1	0.792	855.017
S=C1N2C(=NN1C[NH+]1CCCCC1)N(C)C(=O)C(C#N)=C2c1ccccc1	744873	0	1.529	381.475
o1c2[nH+]c3c(cccc3)c(Nc3ccc(cc3)/C(=N/O)/C)c2cc1	720553	1	3.967	318.349
Clc1cc([N+](=O)[O-])ccc1-c1ccccc1C(=O)[O-]	132247	0	2.063	276.652
O1[C@H](CO)[C@H](O)[C@H](O[C@@H](C(=O)N[C@H](C(=O)N[C@H](CCC(=O)NCC[NH2+]CCNc2c3c([nH+]c4c2cccc4)cccc3[N+](=O)[O-])C(=O)N)C)C)[C@@H](NC(=O)C)[C@H]1OCc1ccccc1	696075	1	-1.153	891.966
O=C1NC(=Nc2c1cccc2)/C(=C(\N[C@@H](Cc1c2c([nH]c1)cccc2)C(=O)[O-])/CCCO)/C#N	744191	0	0.896	456.473
S=C1NC(=O)\C(=C\c2c3c(cc4c(c3)cccc4)ccc2)\C(=O)N1	90737	1	3.58	332.376
O(C)c1c(OC)cc(cc1O)C1=C[C@H]2N(C=C1c1cc(OC)c(OC)cc1)CCC2	650396	1	3.68	409.475
O1[C@]23[C@@H](CC[C@@H]4[C@@]1(O)[C@@H](OC(=O)\C(=C/C)\C)CC[C@]24C)[C@]1(O)C[C@H](O)[C@@]2(O)[C@@H](C[N@@H+]4[C@@H](CC[C@@H](C4)C)[C@]2(O)C)[C@]1(O)C3	93767	0	-0.883	592.741
n1nc(n(N)c1C)C	23773	0	-0.777	112.133
[Sn](SC=1SCCN=1)(SC=1SCCN=1)(CCCC)CCCC	643864	1	7.062	469.34
[nH]1ncc2c1ncnc2N(CCC)CC	11608	0	1.816	205.26
O=C(c1cc(NC(=O)CNC(=O)\C=C\c2ccc(cc2)-c2ccccc2)ccc1NC(=O)Cc1ccc(cc1)C)c1ccccc1	720289	1	6.37	607.697
Oc1cc(c2c(c1)C[C@H]1[C@]2(CC[C@@H]2[C@@]1(CCCC2(C)C)C)C)C	743822	0	6.09	312.489
O1[C@H](C)[C@@H](O)[C@@H]([NH+]2CCOCC2)C[C@@H]1O[C@@H]1c2c(C[C@](O)(C1)C(=O)CO)c(O)c1c(C(=O)c3c(cccc3OC)C1=O)c2O	354646	1	-0.95	614.617
O=C(n1nc(cc1N)-c1ccccc1)\C=C(/N)\c1ccccc1	749518	1	2.524	304.346
S(=O)(=O)([O-])c1cc(O)c2c(c1)cc(S(=O)(=O)[O-])cc2	8627	0	-3.328	302.28
O=C1c2c(cccc2)C(=O)C=C1[C@H](O)c1ccc(N(C)C)cc1	58011	1	2.887	307.343
O=[N+]([O-])c1c2c([nH+]c3c(cccc3C)c2NCCC[NH+](C)C)c(cc1)C	652888	1	2.944	354.446
Clc1ccc(N(C(=O)C)CC(=O)N(CC(=O)[O-])c2ccc(Cl)cc2)cc1	320	0	1.334	394.229
o1c2c(cc1[N+](=O)[O-])c([N+](=O)[O-])ccc2	329127	1	2.046	208.128
S(=O)(=O)(NCCCC=1C(=O)N=C(NC=1C)N)c1ccc([N+](=O)[O-])cc1	95007	0	0.683	367.38
Clc1cc(ccc1)C=1Nc2nccc(c2C(=O)C=1)C	679035	1	3.5	270.714
S(C(N)=N)c1cc(O)ccc1O	33521	0	1.516	184.216
s1c(C(OCC)=O)c(nc1NC(=O)COc1ccc(cc1)\C=C\1/CCc2c(ccc(OC)c2)C/1=O)C	744647	1	4.641	506.57
Clc1ccc(cc1)[C@H]1Nc2c(S(=O)(=O)[C@H]1c1ccccc1)cccc2	140250	0	4.872	369.865
Clc1ccc(S(=O)(=O)Nc2cc(S(=O)(=O)N3CCCCC3)ccc2)cc1	744245	0	3.016	414.927
O(COC(=O)CC)c1ccc(cc1)\C=C/1\CC[C@H](C[NH+](C)C)C\1=O	639514	1	1.731	332.414
S(=O)(=O)([O-])CNc1ccccc1C	11212	0	-0.733	200.235
Clc1ccccc1\C(=C\1/C=CC(=[N+](C)C)C=C/1)\c1ccc(N(C)C)cc1	83193	1	5.426	363.903
O1CCN=C1C	43141	0	0.1	85.1045
I\C=C(/C(=O)c1ccccc1)\c1ccccc1	674454	1	3.714	334.152
Clc1cc2Sc3n(S(=O)(=O)c2cc1C(=O)Nc1c2nsnc2ccc1)ccn3	704313	1	3.481	449.914
O(C(=O)c1c(C)c(C)c(OC)c(C)c1OC)c1c(C)c(cc(OC)c1C)C	646005	1	6.13	372.455
Clc1ccc(NC(=O)NCCNC(=O)Nc2ccc(Cl)cc2)cc1	33745	0	3.039	367.23
O1[C@@H](CO)[C@H](O)[C@H](O)[C@H]1N1C=C(C=CC1=O)C(=O)N	85783	0	-2.801	270.239
Oc1ccc(cc1)\C=N\N=C\1/NC=C([N+](=O)[O-])C=C/1	43385	0	1.082	258.233
FC(F)(F)c1[nH+]ccc(Nc2ccccc2C(=O)N\N=C\c2cccc(OCC)c2O)c1	748671	1	4.956	445.414
O=C(\C=C\c1ccccc1)c1nccn1C	743049	1	2.201	212.247
O=C1C=C(CCC1)CCCC	43892	0	3.106	152.233
S(C[C@H]1OC(=O)[C@@](O)(C1)c1c(n(nc1C)Cc1ccccc1)C)CC	744471	0	2.564	360.47
O=C1NC(=O)N(CO)C1(C)C	9185	0	-0.716	158.155
o1c2c(c3c1cccc3)c(c1c(cc[n+](c1)C)c2C)C	638788	1	4.818	262.326
O=C1N(CC[NH2+]CCCNC(=O)c2cc(nc3c2cccc3)-c2ccccc2)C(=O)c2c3c1cc([N+](=O)[O-])cc3ccc2	673415	1	3.089	574.606
S1(=O)(=O)CCn2c1nc(C)c2C(=O)N1CCCCC1	741794	0	0.714	283.347
Clc1cc(N2CC[NH+](CC2)CC(=C)c2ccc(cc2)C(=O)Nc2ccccc2N)ccc1F	735405	1	3.392	465.97
s1ccc(Cc2ccccc2)c1C(=O)c1sccc1	99461	0	5.115	284.396
O=C(N[O-])c1ccccc1N	111686	0	-0.605	151.143
[NH2+]=C(N1CCCc2c1cccc2)N1CCCc2c1cccc2	52106	0	3.947	292.398
ClC[C@H]1c2c3c(cccc3)c(N)cc2N(C1)C(=O)c1[nH]c2c(c1)cc(NC(=O)Nc1cc3cc([nH]c3cc1)C(=O)N1C[C@H](c3c4c(cccc4)c(N)cc13)CCl)cc2	701743	1	6.754	807.725
O=C/1N(c2c(cccc2)\C\1=N\NC(=O)Cc1c2c([nH]c1)cccc2)C	111575	0	2.298	332.356
Oc1c2c(C(=O)c3c(cccc3)C2=O)c(O)c2n(ccc12)CCCC[NH2+]C(CO)(CO)C	724631	1	0.993	439.481
S\1c2scc([n+]2C(=O)/C/1=C/c1cc2OCOc2cc1)-c1cc(O)c(O)cc1	657719	1	4.264	398.432
S([C@@H](C[N+](=O)[O-])c1cc2OCOc2cc1)Cc1ccccc1	664266	1	3.868	317.36
O1CC(=CC1=O)CCO[C@@H]([C@H](O)C)\C=C\C=C\C(O[C@H]1C[C@@H]2O[C@H]3C=C(CC[C@]3(CO)[C@@]1(C)[C@]12OC1)C)=O	331120	1	1.704	530.607
O(C)c1cc/2c(cc1OC)C=Cc1cc(OC)c(OC)cc1C\C\2=N/O	693414	1	3.426	355.384
Clc1cc(cc(Cl)c1)C[N@@H+](C[C@@H](C(=O)c1ccccc1)c1ccccc1)C	623723	1	4.67	399.333
Oc1c2c(C(=O)C=CC2=O)c(O)cc1[C@H](OC(=O)\C=C(\C)/C)C\C=C(\C)/C	140377	1	4.41	370.396
O=C1NC(=O)NC=C1CC(C)C	150492	0	0.598	168.193
Brc1cc(ccc1)C(OC)=O	7319	0	2.433	215.044
s1c2-n3nnc(c3NC(=O)c2c(C)c1C(O\C(=N\C1CCCCC1)\NC1CCCCC1)=O)C#N	742116	0	5.152	481.571
O1[C@@H]2C[C@H](O)[C@@]3([C@H]([C@H](OC(=O)C4CCCCC4)[C@]4(O)C[C@H](OC(=O)[C@H](O)[C@@H](NC(=O)C5CCCCC5)C5CCCCC5)C(=C([C@@H](OC(=O)C)C3=O)C4(C)C)C)[C@]2(OC(=O)C)C1)C	671869	1	4.584	872.049
Ic1cc(Cl)c(N)cc1	137040	0	2.325	253.468
FC([N+](=O)[O-])([N+](=O)[O-])CC[NH2+]CC(F)([N+](=O)[O-])[N+](=O)[O-]	683258	1	0.624	304.143
Oc1c2c(cccc2)c(O)cc1C(=O)C	111552	0	1.994	202.206
S=C(N)N1N=C2[C@H](CCc3c2cccc3)[C@@H]1c1ccccc1	645615	1	4.109	307.413
I[Sn+4]1(I)([N@@H+]([N-][C-]2[C@H]1C=CC=C2)c1ccccc1)[C@H]1C=CC=C[CH-]1	624658	1	4.211	633.86
Oc1cc2c(-n3c4c(C2=O)c(NCC[NH+](CC)CC)ccc4nc3)cc1	645809	1	1.544	351.422
O1c2c(C=3OC4=NC(=[NH2+])N(C4=CC=3[C@@H]1O)C)cccc2	747820	0	1.077	270.263
n1(c2c(c3c1cccc3)cccc2)-c1ccccc1	10416	0	5.105	243.303
O1[C@H](CO)[C@H](OC)[C@@H](OC(=O)[C@H]([NH3+])CCCC[NH3+])[C@H](O)[C@@H]1n1c2c(c3c(c4c5c([nH]c24)cccc5)C(=O)NC3=O)c2c1cccc2	726578	1	-0.085	631.676
Clc1nc2c(cccc2)c(N=[N+]=[N-])c1C#N	669167	1	3.459	229.625
Oc1ccc(N)cc1N	1536	0	0.094	124.141
OC=1C(=O)N=CNC=1C[NH+]1CCCCC1	101653	0	-1.704	210.253
O(C)c1c(OC)cc(cc1OC)\C=C/c1cc(OC(=O)[C@@H]([NH3+])CCC(=O)[O-])c(OC)cc1	646699	1	0.264	445.462
OC1(CCCC1)[C@@H](C(=O)[O-])C1CCCCC1	19000	0	1.323	225.304
Fc1cccc(F)c1-c1nc2cc(Cc3c(F)cccc3F)c(OC)cc2n1Cc1c(F)cccc1F	720321	1	8.251	512.446
s1c2N=CN(CC(=O)N\N=C/3\CCCCC\3)C(=O)c2c(C)c1C(=O)N	746750	0	0.952	361.419
s1ccnc1N=Nc1c2c(ccc1O)cccc2	139021	1	3.862	255.295
O=C(CC[NH+](CC)CC)C	28042	0	-0.713	144.235
[nH]1nc(N)c2cccnc12	48665	0	0.314	134.139
O(C(=O)C[N@@H+]1CC([N@H+](CC1(C)C)CC(OCC)=O)(C)C)CC	108265	0	-1.568	316.436
O(\N=C\c1nc(ccc1)C)CCc1ccccc1	48803	0	3.161	240.3
O=C1N(Cc2c1cccc2)c1ccccc1	97577	0	2.574	209.243
O1[C@@H]2CC(=C)C(=O)[C@]12C(O[C@H]1CC[C@H]2[C@H]3[C@H](CC[C@]12C)[C@@]1(C(=CC(=O)CC1)CC3)C)=O	654893	1	4.062	424.529
[NH+](CCC#N)(CC)CC	95	0	-0.565	127.207
O\1c2c(ccc(OC)c2)C(=O)/C/1=C\c1cc(OCC(=O)c2ccccc2)ccc1	743511	0	4.359	386.397
ClC=1/C(/SSC=1Nc1ccccc1)=N/S(=O)(=O)c1ccc(cc1)C	729181	1	4.691	396.935
O(Cc1ccccc1)C(=O)[C@@H](NC(OCc1ccccc1)=O)CCC(=O)C=[N+]=[N-]	333602	0	3.419	395.409
s1c2c(nc1)c1c(Nc3ncccc3C1=O)cc2	661818	1	2.426	253.279
Oc1c2c(C[C@@H]3C(=C([O-])[C@@]4(O)[C@H](CC([O-])=C(C(=O)N)C4=O)C3)C2=O)ccc1	683551	1	-1.189	369.325
O(CC)C(=O)Nc1[nH]c2c(n1)cccc2	42044	1	1.999	205.213
Clc1nc2SC=Cn2c1\C=C\1/c2cc(Cl)ccc2NC/1=O	711082	1	3.169	336.196
Clc1cc(Cl)ccc1-c1nc([nH]c1)-c1cc([N+](=O)[O-])ccc1	745618	1	4.812	334.157
[As](=O)([O-])([O-])c1ccc(NC(OCC)=O)cc1O	32873	0	-0.833	303.1
O1c2c(OC1)cc1c(c2)C(=O)C2=C1N(CC[NH3+])C(=O)c1cc(OC)c(OC)cc12	726331	1	0.116	395.385
O1CC2=C(C=C3N(Cc4c3nc3c(c4)cc4OCOc4c3)C2=O)[C@@](O)(CC)C1=O	634724	1	1.514	392.362
O(C)c1ccc(cc1[N+](=O)[O-])C(=O)[O-]	29085	0	-0.137	196.137
O(C(=O)C\C(=N/NC(=O)c1ccncc1)\C)CC	243511	0	0.224	249.266
[nH]1c2CCCCc2c2c1cccc2	17329	0	3.506	171.238
n1cnc2n(ncc2c1NC)C	1426	0	0.447	163.18
O(CCC)c1ccccc1OCCC	6192	0	3.542	194.27
O=C1[C@H](CC=C1C[C@@H](C)c1ccc(cc1)CC(C)C)C[NH+](C)C	626876	1	3.617	314.485
[NH+](/Cc1ccccc1)=C/1\N[C@@H]2CC[C@H]([C@@H](CCCC(C)C)C)[C@]2(CCC\1)C	719365	1	6.44	369.606
O(CCOCCOCCCC)C1=CC(=O)c2c(C1=O)c(O)ccc2O	661418	1	2.028	350.363
O1N=C(C[C@@H]1c1cc(OCCCCOc2cc3N=C[C@H]4N(CCC4)C(=O)c3cc2OC)c(OC)cc1)c1cc(OC)c(OC)c(OC)c1	744335	1	4.919	659.725
S(=O)(=O)(\C(=C\c1oc(cc1)C(OC)=O)\c1oc([N+](=O)[O-])cc1)c1ccc(NC(=O)C)cc1	291056	1	2.699	460.414
BrC1=Cc2c3c(cccc3ccc2)C1=O	177866	0	3.233	259.098
Clc1nc(nc(Cl)n1)Nc1cc(Nc2c3c(c(N)c(S(=O)(=O)[O-])c2)C(=O)c2c(cccc2)C3=O)ccc1S(=O)(=O)[O-]	364368	0	-0.315	635.413
[Hg+2]1([SH]=C2[N-]C(=[NH+]c3ncn1c23)N)[C@H]1C=CC([NH+]([O-])[O-])=C[CH-]1	631945	1	1.336	491.899
[Sn+2]123(O[C@@-](C)[CH-][C@@-](O1)C)(O[C@@-](C)[CH-][C@-](O2)C)[NH2+][CH-][CH-][NH2+]3	644934	1	0.79	375.008
O=C1c2c(Nc3c1cccc3)c(ccc2NCCC[N@@H+](CCCNc1c2c3N(c4c(cccc4)C2=O)C(=O)N(CC[NH+](C)C)C(=O)c3cc1)C)C(=O)NCC[NH+](C)C	710560	1	-0.416	788.957
S([C@@H]1CC(=O)N(CCCC)C1=O)[C@@H]1CC(=O)N(CCCC)C1=O	22386	0	1.691	340.438
O1CC[NH+](CC1)Cc1cc(cc(C[NH+]2CCOCC2)c1O)C[NH+]1CCOCC1	25574	0	-3.811	394.528
Clc1ccc(S(=O)(=O)\N=C\2/NCCN/2C(SN2CCN3C2=NSC3=S)=S)cc1	734148	1	4.044	493.07
Clc1ccc(NC(=O)N2c3c(NC(=O)C[C@@H]2C)cccc3)cc1	748358	0	2.825	329.781
P(OC[C@@H]1O[C@H](n2cnc(C(=O)N)c2N)[C@@H](O)[C@H]1O)(=O)([O-])[O-]	292227	0	-5.162	336.195
FC(F)(F)C1(O)c2c(cc(cc2)C(C)(C)C)C(O)(c2c1ccc(c2)C(C)(C)C)c1ccccc1	617153	1	7.119	468.55
O1OC2(OOC13CCC(CC3)C)CC[C@]1([C@@H](C2)C[C@@H](OC(=O)C)[C@@H]2[C@@H]3CC[C@H]([C@@H](CCC(=O)N)C)[C@@]3(C)[C@@H](OC(=O)C)C[C@@H]12)C	720305	1	4.205	633.812
O(c1cc(ccc1O)C[C@@H]1[N@H+](CCc2cc(OC)c(OC)cc12)C)c1cc2c(cc1OC)CC[N@H+](C)[C@H]2Cc1ccc(OC)cc1	708929	1	4.124	626.782
O1[C@H](C)[C@H](NC(=O)c2cccc(NC=O)c2O)C(O[C@@H](C)[C@H](OC(=O)CC(C)C)[C@@H](CCCC)C1=O)=O	58239	1	3.283	520.572
s1c2c(cc1[C@@H](O)C)C(=O)c1sccc1C2=O	682449	1	2.672	264.32
S(=O)(=O)(Nc1ccccc1)c1cc(N)c(cc1)C	96421	0	2.057	262.327
S(C)c1nc(cc(O)n1)-c1ccccc1	48355	0	3.358	218.275
O1c2c(NC(=O)[C@H]1CC(OCC)=O)c1c(n(C)c(C)c1C(OCC)=O)cc2	741266	0	1.908	374.388
O1CCN(CC1)c1ccc(cc1)C(=O)Cc1ccccc1	111169	0	3.118	281.349
O1[C@@]2(O[C@@H]3C=C4[C@@H]5[C@@H](C[C@H](O)[C@@]4(C)[C@]3(O)[C@@H]2C)[C@]2([C@@H](Cc3nc4C[C@@]6([C@@H](Cc4nc3C2)CC[C@@H]2[C@@H]6C[C@H](O)[C@@]3(C2=C[C@H]2O[C@@]4(O[C@](C[C@@H]4O)(CO)C)[C@@H](C)[C@]23O)C)C)CC5)C)CCC1(C)C	378736	1	3.516	913.189
S(F)(=O)(=O)c1ccc(cc1)C	2749	0	1.938	174.193
O1[C@@](OO)(Cc2ccccc2)C(C(OC)=O)=C(C(OC)=O)C1=O	691782	1	1.519	322.267
Clc1ccc(cc1)[C@H]1Nc2ncnc(N)c2N=C(C)[C@H]1C(OC)=O	749656	0	2.137	345.784
O=C(Nc1ccccc1N)c1ccc(cc1)C(C[NH+]1CCN(CC1)c1ncccc1)=C	729999	1	1.91	414.523
Brc1c-2nc(cc-2cccc1)-c1ccccc1	639896	1	4.711	284.151
S(C)c1cc2c(C=3N(CCC[NH3+])C(=O)c4cc([N+](=O)[O-])ccc4C=3C2=O)cc1	736680	1	0.88	396.44
O1[C@@H]([C@@H](COC(=O)C)C(C(OC)=O)=C1c1cc2OCOc2cc1)c1cc(OC)c(OC)c(OC)c1	622093	1	2.685	486.468
s1c2c(nc1-c1cccnc1)cccc2	37812	0	2.688	212.27
S=C(N1CCCCCC1)[N-]\N=C\c1ncccc1	667872	1	3.91	261.366
O1[C@@H](COC(=O)C)[C@H](OC(=O)C)[C@@H](OC(=O)C)[C@@H](OC(=O)C)[C@H]1Oc1ccc(cc1)C(=O)C(C[NH+](C)C)=C	350629	1	0.085	536.548
O(C)c1cc2Cc3c(-c2cc1NC(=O)c1ccccc1-c1ccccc1C(=O)[O-])cccc3	128602	0	3.935	434.463
ClCCN(CC)c1ccc(NC(=O)c2cc(cc(c2)C(=O)NCC[NH+](C)C)C(=O)Nc2ccc(N(CCCl)CC)cc2)cc1	675255	1	3.537	642.639
O=C1N(c2ccccc2)C(=O)NC(=O)C1	96040	0	0.735	204.182
O(CC[NH+](CC)CC)c1ccc(cc1OC)\C=C\1/C[C@H]2[C@H]3[C@H](CC[C@]2(C)[C@H]/1OC(=O)C)[C@@]1(C(C[C@@H]([NH+]2CCCC2)CC1)=CC3)C	727086	1	4.063	620.905
Brc1cc2c([nH+]c3c(cccc3)c2N2C[N@@H+](CSC2=S)C)cc1	709319	1	4.784	406.363
ClC=1C(=O)N(N=CC=1Cl)CCC(OCC)=O	634471	1	0.942	265.093
Clc1cc(N2N=Nc3n(c(-c4ccccc4)c(C)c3C#N)C2=O)ccc1	708782	1	6.244	361.784
S=C1N=CNc2n(cnc12)Cc1ccc(cc1)C(=O)[O-]	73756	0	0.034	285.301
OC([C@H](C[NH+](CC)CC)c1ccccc1)(c1ccccc1)c1ccccc1	38511	0	3.512	360.512
O=C1C[C@@H]2[C@@H](CC(=O)/C(=C\CC[C@](O)(C)[C@@H]2O)/C)C1=C	703216	1	1.273	278.343
O1[C@H](CC2=C([C@@H]1C)C(=O)c1c(cccc1O)C2=O)CC(=O)[O-]	267461	1	-0.024	301.271
O\1c2c(cccc2)C(=O)/C/1=C/c1cc(OCC(=O)c2ccc(OC)cc2)ccc1	743502	0	4.359	386.397
O=C1NC(C(OCC)=O)(C(OCC)=O)[C@H](C1)CC(C)C	82082	0	1.536	285.336
Clc1nc(nc(n1)NCC)NCC	25999	0	2.158	201.657
Clc1ccccc1OC(=O)c1ccccc1Nc1cc([nH+]cc1)C(F)(F)F	731822	1	6.108	393.767
Clc1ccc(OC2=C(c3c(OC2=O)cc(OC)cc3)c2ccc(O)cc2)cc1	699448	1	5.048	394.805
O1CCOC12CC[C@]1([C@H](C2)CC[C@H]2O[C@@H]12)C	107256	0	1.176	224.296
S(=O)(=O)(N1CCC2(CC1)C(=O)NC(=O)NC2=O)c1ccccc1	85016	0	-0.044	337.351
O(C)c1c(OC)c2C=3C(=CC(=O)C(N)=CC=3)[C@@H](NC(=O)C)CCc2cc1OC	403144	1	1.159	384.426
O1[C@H](C)[C@@H](O)[C@@H]([NH+](C)C)C[C@@H]1O[C@@H]1c2c(C[C@](O)(C1)C(=O)C)c(O)c1c(C(=O)c3c(cccc3OC)C1=O)c2O	258812	1	0.035	556.581
[s+]1c2c(cc([N+](=O)[O-])cc2)c2[nH]c3c(c2c1)cccc3	150762	1	4.384	281.309
Oc1c2c(C(=O)C3=C(C[C@@](O)(C)[C@@H](O)C3)C2=O)c(O)cc1	322355	1	0.708	290.268
O=C(NCC[NH2+]CC[NH3+])c1c2[nH+]c3c(cccc3C)c(N)c2ccc1	693545	1	-0.886	340.443
Clc1ccc([N+](=O)[O-])cc1C(=O)Nc1sc2c(n1)cccc2	694253	1	3.799	333.75
Clc1ncnc2nc[nH]c12	744	0	0.635	154.557
S1S[C@]2(N(C)C(=O)[C@@]1(N(C)C2=O)Cc1c2c(n(c1)[C@@]13[C@@H](N4[C@@]5(SS[C@](N(C)C5=O)(CO)C4=O)C1)Nc1c3cccc1)cccc2)CO	289491	1	2.929	710.867
O(C)c1cc([nH]c1\C=C\1/N=C(C)C(C(OCC)=O)=C/1C)-c1[nH]ccc1	742420	1	3.381	339.388
O=C1CC(=O)c2c3c1cccc3ccc2	87590	0	2.233	196.201
O1CCOc2c1cc(NC(=O)COC(=O)C1=NN(C(=O)CC1)c1ccccc1)cc2	744249	0	1.581	409.392
O1C=C([C@H]2[C@H]([C@H]3[N@H+]([C@H](c4n(c5c(c4C3)cccc5)C)C2)C)C1)\C=C\[C@]12N3c4c([C@H]1CC[N@@H+]1[C@H]2C[C@H]([C@H]3C(OC)=O)\C(\C1)=C/C)cccc4	719264	1	2.676	644.845
S1[C@H](c2c(n(nc2C)C(=O)c2ccccc2O)NC1=N)c1ccc(O)cc1	657993	1	3.593	380.42
S(Cc1ccccc1)c1nc(nc2n(cnc12)CCCC)N	42382	0	3.739	313.421
[As](O)(O)c1ccc(cc1)C(=O)Nc1ccc(NC(=O)C)cc1	12749	0	0.663	362.212
O1c2c3[C@@H](O[C@@H](Cc3cc(O)c2C(=O)[O-])CCCCC)C[C@]12OCCC2	744087	0	2.228	361.409
N#C[C@]1([C@@H]2C=C[C@H](C1)C2)CCC[C@H]1[C@H]2C=C[C@@H](C1)C2	92390	0	4.123	253.382
Clc1c(cc(Cl)cc1Cl)-c1n2N=C(Sc2nn1)c1ccc(OC)cc1	742067	0	5.355	411.693
O=C1NC(=O)C[C@H]1/C(=C(\N)/C)/C(OCC)=O	128705	0	-1.097	226.229
S(CCCC)C1=NNC(=S)c2[nH]cnc12	62407	0	2.465	240.348
O=C1c2c(cccc2NCCC[NH2+]CCO)C(=O)c2c1cccc2NCCC[NH2+]CCO	344003	1	-1.784	442.551
O(C)C1=CC(=O)c2c(C1=O)c(O)c1c(C(=O)[C@]3(c4c(CC3)cc3c(C(=O)NC(=C3)\C=C\C=C\C)c4O)C1=O)c2O	305263	1	2.789	539.489
O(\C(=C\c1ccccc1)\C)C(=O)c1ccccc1	100	0	3.717	238.281
Oc1ccc(cc1)C(CC(C)C)(C)c1ccc(O)cc1	73727	0	4.942	270.366
O=C([O-])c1cc([N+](=O)[O-])cc2c1cccc2	26051	0	0.788	216.17
N\1NN=N/C/1=N\N=C\c1ccccc1	164020	0	1.912	188.189
Clc1cnc(Oc2ccc(NC(=O)NC(=O)c3ccccc3[N+](=O)[O-])cc2[N+](=O)[O-])nc1	624285	1	3.15	458.769
O=C(N(C)c1ccc([N+](=O)[O-])cc1)C	5412	0	1.05	194.187
O=C(C[C@H](C(=O)[O-])C)c1cc(ccc1C)C	78726	0	1.376	219.256
Oc1cc(ccc1)C	8768	0	2.074	108.138
[Sn](Oc1c2ncccc2ccc1)(c1ccccc1)(c1ccccc1)c1ccccc1	628585	1	6.934	494.172
o1c2c(cc1C=1C=C(NC(=O)C=1C#N)C(OC)=O)cccc2	742912	0	1.674	294.262
O(CC)c1cc2c3c([nH]c2cc1)c(c1c(c[n+](cc1)C)c3C)C	650263	1	5.141	305.394
S(=O)(=O)(\C(=C\c1c2c([nH]c1-c1ccccc1)cccc2)\C(=O)C)c1ccccc1	749023	1	4.938	401.478
O1c2cc(N3C(=O)[C@H]4[C@@H]([C@H]5[C@@H](CC[C@H](C5)C(C)(C)C)c5c6cc(ccc6[nH]c45)C)C3=O)ccc2OC1	706740	1	6.111	484.586
Clc1ccccc1[C@H]([N@@H+]1CCc2sccc2C1)C(OC)=O	748298	0	2.174	322.83
Brc1cc2OCOc2cc1/C(=C/c1cc2OCOc2cc1[N+](=O)[O-])/C(=O)[O-]	101649	0	2.111	435.159
Fc1ccc(cc1)-c1nnc(N2CCOCC2)c2c1cccc2	746503	0	3.661	309.338
Brc1cc2oc(nc2cc1Cl)N	24974	0	2.563	247.476
s1c2c(nc1/C(=C/c1ccc(OC)cc1)/C#N)cccc2	748507	0	4.129	292.355
Clc1cc(ccc1)C=1Nc2c(cc3OCOc3c2)C(=O)C=1	656160	1	3.394	299.709
S1CC(=O)N(NC(=O)C(O)(c2ccccc2)c2ccccc2)[C@@H]1c1ccc(cc1)C(OC)=O	742822	0	3.28	462.518
s1cc(c2c1cccc2)CC(OC)=O	42319	0	2.582	206.261
S(=O)(=O)([O-])[C@@]1(O)C2=C([C@@H]3[C@H](N=CC=C3)[C@]1(S(=O)(=O)[O-])O)C(=O)c1c(cccc1)C2=O	13977	1	-4.655	453.4
O1CC(=C(c2cc(OC)c(OC)c(OC)c2)C1=O)c1ccccc1	726216	1	3.296	326.343
S=C(NCCc1ncccc1)[N-]\N=C(/c1ccccc1)\c1ncccc1	689531	1	4.542	360.455
O1[C@H]2[C@]34[C@@H]([C@@H](OC(=O)C(CO)(C)C)C1=O)[C@@H](C)[C@@H](O)[C@@](OC3)(O)[C@@H]4[C@@]1([C@@H](C2)C(=CC(=O)[C@H]1O)C)C	688274	1	-0.047	494.531
Clc1ccc(cc1S(F)(=O)=O)CCCCc1cc(N2C([NH+]=C([NH+]=C2N)N)(C)C)ccc1	129794	1	4.382	467.988
S(C)c1ncnc2n(cnc12)CC(=O)[C@@H]1CC[C@@H]2[C@H]3[C@H](CC[C@@]12C)[C@@]1(C(=CC(=O)CC1)CC3)C	109131	1	4.599	478.649
S1c2c(NC(=O)[C@H]1c1ccccc1)cccc2	35327	0	2.897	241.308
ClCC(=O)[C@@H](NC(=O)[C@H](NC(OCc1ccccc1)=O)CC(C)C)Cc1ccccc1	173904	1	4.53	444.951
Sc1ccccc1-n1c(ccc1-c1ccccc1)-c1ccccc1	101790	0	6.685	327.442
N(N)c1c2c(ccc1)cccc2	4158	0	2.014	158.2
O([N-][N@H+]([O-])N1CCN(CC1)C(OCC)=O)c1ccc([N+](=O)[O-])cc1[N+](=O)[O-]	724771	1	0.627	385.309
Clc1cc(Cl)c(F)cc1-c1n2N=C(CSc2nn1)c1ccc(Cl)cc1	726627	1	5.918	413.684
P(Oc1ccccc1)(=O)(N)c1ccccc1	25418	0	2.168	233.203
Oc1cc(ccc1O)[C@@H](OC)C[NH2+]C	39216	0	-0.45	198.239
S(C)C=1NC([O-])=C(CCOCC)C(=O)N=1	66837	0	0.624	229.276
O(C)c1cc(ccc1O)\C=C\C(=O)c1cc(N2C=C(NC2=O)c2ccccc2)ccc1	748561	1	3.735	412.437
O1[C@H](COC(=O)C)[C@H](O)[C@H](O)[C@H](O)[C@H]1O[C@@H]1C[C@@H]2[C@@]([C@H]3CC[C@@]45[C@@H](CC=C4[C@]13C)[C@@H](C)C(=C)[C@@H](O)C5)(CC[C@@H](OC(=O)C)C2(C)C)C	676814	1	3.046	660.835
P(OCC)(OCC)(=O)NCCc1ccccc1	100755	0	1.79	257.266
[O-][n+]1cc2c(cc1)c(c1[nH]c3c(c1c2C)cccc3)C	237068	1	3.209	262.306
s1c2c(c3c1cccc3)c(c1c(cc[n+](c1)C)c2C)C	638066	1	5.377	278.391
OCC[NH2+][C@@H](CCCCCC)C	111949	0	1.088	174.304
S1C=Cn2c1nc(-c1ccc([N+](=O)[O-])cc1)c2\C=N\[N-]C(=[NH2+])N	709136	1	1.605	329.337
ClCCC(=O)N1CCN(c2c1cccc2)\C=C(/C#N)\C(OCC)=O	87611	0	1.961	347.796
O(CC)C(=O)\C(=C\CC(C)C)\C(OCC)=O	30048	0	2.798	228.285
Clc1ccccc1CSc1c2cc(F)ccc2nnc1	66093	0	4.544	304.77
O=C1N(C2(CCCC2)C(=O)NCC(C)C)C(=O)c2c1cccc2	78850	0	2.585	314.379
S=C(N1CCCCCC1)[N-]\N=C(/C)\c1nc(ccc1)/C(=N/[N-]C(=S)N1CCCCCC1)/C	668340	1	7.103	471.685
O1CO[C@H]([C@@H](O)CO)C(O)[C@@H]1[C@@H](O)CO	1751	0	-2.833	224.208
[NH+](CCN(\C(=N\c1ccccc1)\N1CCCCC1)c1ccccc1)(CC)CC	671122	1	3.387	379.561
S(OCCC)(=O)(=O)c1ccc(cc1)C	11005	0	2.56	214.281
O=C1N(C)C(=O)N(C=2N/C(/NC1=2)=N/N=C/c1ccc(N(C)C)cc1)C	64665	0	0.716	341.368
ClC=1N(C)C(=O)N(C)C(=O)C=1NC(OCC)=O	98049	0	0.232	261.662
Clc1cc2[s+]snc2cc1	621376	1	3.42	188.678
O[C@H]1C[C@H]2[N@H+]([C@H](CC2)[C@H]1COC(=O)c1ccccc1)C	5564	0	0.208	276.351
[Fe+]12[SH]=C(N3CC4CCC(CC4)C3)[N-][N@H+]1[CH-]C=1N2NC=CC=1	633276	1	0.957	347.26
[C@H]12[C@@H](C[C@H]3[C@H](C1)C(CCC3(C)C)(C)C)C(CCC2(C)C)(C)C	108302	0	6.657	304.553
O=C(CC[NH+](Cc1ccccc1)Cc1ccccc1)C	136461	0	1.756	268.373
Brc1sc(Br)c2c1C(=O)C[C@H]2[NH3+]	662116	1	0.431	312.002
Oc1ccccc1[C@H]1[N+]([O-])=C2C(=NN1)CCCC2	309885	0	1.194	245.277
O(C(=O)Cn1cc(nc1)C)CC	40747	0	0.261	168.193
Clc1ccc(cc1)-c1c2c(nc3c1CCC[C@@H]3C)ncnc2N	747511	0	4.391	324.807
O1c2c(n(c3c4c(ccc23)cccc4)Cc2[nH]c3c(n2)cccc3)-c2c(cccc2)C1=O	638441	1	5.941	415.443
s1c2c(nc1N\N=C/1\c3c(cccc3)C(=O)[C@H](SC)[C@H]\1C)cccc2	730198	1	4.808	367.488
O=[N+]([O-])c1ccc(cc1)/C(=N/c1ccccc1)/N1CC1	49873	0	2.794	267.283
O1CCCCCCCCCC#Cc2c(cccc2)C1=O	743052	0	5.543	270.366
Clc1sc(Cl)c2c1C(=O)C[C@@H]2O	700862	1	1.508	223.076
ClC1=C(Cl)C(=O)c2c(C1=O)c(OC)ccc2OC	656208	1	2.462	287.096
Fc1cc(ccc1)\C=C\[N+](=O)[O-]	295466	1	2.015	167.137
O(C(=O)C(=O)c1c2c([nH]c1C)cccc2)CC	60578	0	2.358	231.247
Clc1cc(Cl)ccc1Cn1c2c(cc(O)c3[nH]c(nc23)Cc2ccccc2)c(C(OCC)=O)c1C	740840	1	6.824	508.396
Clc1nc(SC)nc2Sc3n(c4c(n3)cc3OCOc3c4)[C@@H](O)c12	697786	1	4.09	380.829
S=C1NC(=O)C(c2ccccc2)C(=O)N1	32463	0	1.346	220.248
[Cu+]12[SH]=C(N3CC4CCC(CC4)C3)[N-][N@H+]1[CH-]C=1N2NC=CC=1	633277	1	0.957	354.961
O1c2c(ccc(O)c2)C(=O)C=C1c1ccccc1	94258	0	2.894	238.238
S(CCP(CCP(c1ccccc1)c1ccccc1)c1ccccc1)c1ccccc1	655900	1	8.693	458.534
S(CC=1NC(=O)c2cc(OC)c(OC)cc2N=1)C=1NC(=O)c2c(N=1)cccc2	745817	0	2.513	396.42
Clc1ccc(Sc2sc3cc(NC(OCC)=O)ccc3n2)cc1	275971	1	5.35	364.87
Clc1cc2c(N=C3SC(=S)N4CCN=C4N3[C@H]2c2ccccc2)cc1	741238	0	5.802	384.906
O(C)c1c(OC)cc(-n2cncc2-c2cc3c(cc2)cccc3)cc1OC	736992	1	4.168	360.406
S1S\C(=N/C(=S)N(C)C)\N(Cc2ccccc2)C1=S	645616	1	5.714	327.512
FC(F)(F)c1cc(NC(=O)C(=O)[C@@H](C(=O)c2cc3c(cc2)cccc3)[C@@H]2OC(=O)c3c2cccc3)ccc1	641241	1	5.459	517.452
O=C1NC(=O)C(=C1c1c2c(n(OCC)c1)cccc2)c1c2c([nH]c1)cccc2	724626	1	1.138	371.389
O=C1CNc2c3c(ccc2)cccc3NC1	748362	0	1.623	212.247
O=C1N=CNc2nn[nH]c12	22709	1	-0.443	137.1
Oc1ccc(cc1)\C=C\C(O[C@H]1CC[C@]2([C@@H](CC[C@@]3([C@@H]2CC=C2[C@@H]4[C@@H](C)[C@@H](CC[C@@]4(CC[C@]23C)C(=O)[O-])C)C)C1(C)C)C)=O	729212	1	7.288	601.835
O=C1NC(=O)NC=C1CC=C	81160	0	-0.044	152.151
O=C1c2c(-c3nc(nnc13)-c1cc([N+](=O)[O-])ccc1)cccc2	680350	1	3.047	304.26
Clc1cc(ccc1Cl)\C=N\O	3935	0	2.985	190.027
O(c1ccc([N+](=O)[O-])cc1)c1ccccc1	57080	0	3.284	215.205
[NH2+]=C(NCCCCCCCCC)c1ccc(N2CCN(CC2)c2ccc(cc2)C(=[NH2+])NCCCCCCCCC)cc1	729167	1	9.159	576.902
S(C)C1=CC=C2c3c(cc(OC)c(OC)c3OC)CC[C@H](OC(=O)C)C2=CC1=O	691041	1	3.249	416.487
O=[N+]([O-])C=1C=C/C(/NC=1)=N\N=C\c1ccc(N(CC)CC)cc1	42860	0	2.184	313.354
n1cc(ccc1)CCc1ccncc1	66168	0	1.959	184.237
Oc1cc(O)c2nc3c(nc2c1C=O)c(O)ccc3C(OC)=O	106995	1	1.948	314.25
S(=O)(=O)(N\N=C/1\c2cc(O)c(OCC)cc2[C@@H]2[C@H]([C@@H]3CC[C@H](O)[C@]3(CC2)C)C\1)c1ccc(cc1)C	685231	1	4.461	498.634
O1[C@@H](C(C#N)(C#N)C(C#N)=C1N)c1ccc([N+](=O)[O-])cc1	681866	0	0.816	281.226
s1c2CCCCc2c2c1-n1c(nnc1CSCC(=O)[O-])N(Cc1ccccc1)C2=O	743485	0	2.181	439.531
Fc1ccc(N[C@@H]2CC(=O)N(c3ccc(OC)cc3[N+](=O)[O-])C2=O)cc1	744272	0	2.418	359.309
[Pt+2](Cl)(Cl)(N)N1C=2C(CC=CC=2)=CC=C1	662252	1	1.398	412.173
OC1=CC=CN(CCC[NH+](CCCN2C=CC=C(O)C2=O)CCN2C=CC=C(O)C2=O)C1=O	748389	1	-3.627	457.5
S(=O)(=O)(c1ccc(O)cc1)c1ccc(O)cc1	8712	0	2.448	250.27
[Pt+2](Cl)(Cl)(N)N	119875	1	-0.529	298.029
Clc1ccc(NC=2NC(=O)c3c([nH]nc3)N=2)cc1	741285	0	1.634	261.667
O(C)c1ccc(cc1)/C(=C/c1cccnc1)/C#N	63001	0	2.488	236.269
S1c2n(N=C1S(=O)(=O)\N=C\N(C)C)c(C=O)c(n2)-c1oc(cc1)-c1ccc([N+](=O)[O-])cc1	699670	1	1.99	474.47
Clc1cccc(Cl)c1\C=N\NC(=O)c1ccc(nc1Nc1cc(Cl)ccc1C)C(F)(F)F	747199	1	7.472	501.716
n12c(nc3c1cccc3)/C(/N=C2c1ccccc1)=C/c1ccc(N(CC)CC)cc1	719481	1	5.963	392.496
Cl/C(/C(/[N+](=O)[O-])=C(\Cl)/Sc1ccccc1)=C(\Cl)/Cl	665102	1	4.791	345.029
Clc1nc(Nc2ccc(S(=O)(=O)Nc3sccn3)cc2)c2cc(OC)c(OC)cc2n1	749620	0	3.784	477.944
Clc1c(Cl)c(Cl)ccc1NCc1cnc2nc(nc(N)c2c1C)N	666787	1	3.871	383.663
FC(F)(F)/C(/OC(=O)C)=C\1/C[C@H]2[C@H]3[C@H](CC[C@]2(C)C/1=O)[C@@]1(C(C[C@@H](OC(=O)C)CC1)=CC3)C	45238	1	4.524	468.506
O=C(NC(NC#N)=N)c1ccccc1	41785	0	0.805	188.186
n1c2c(c3c(cc2)cccc3)c(cc1C)C	97276	0	3.693	207.27
s1ccnc1NC(=O)COc1ccc(cc1)\C=C\1/CCc2c(ccc(OC)c2)C/1=O	744643	0	3.863	420.481
Oc1cc(C)c(O)cc1-c1cc(O)c(cc1O)C	2805	1	3.352	246.259
Clc1ccc(cc1)-c1nc2c(c3c1N=C(N(N)C3=O)C)cc(Cl)cc2	741297	0	3.799	371.22
O=[N+]([O-])c1ccc(nc1)NC1CCCCC1	93940	0	2.779	221.256
Clc1c2NC(=O)/C(/c2ccc1Cl)=C\c1ccc(N(C)C)cc1	748499	0	4.222	333.212
BrCC(=O)Nc1ccc(OCCCC2=C(NC(=NC2=O)N)c2ccccc2)cc1	106026	0	2.893	457.32
s1c2c(nc1C=1c3c(cc([N+](=O)[O-])cc3)C(=O)N([C@H](C)c3ccccc3)C=1N)cccc2	691201	1	4.537	442.49
O(CC)c1cc2c3c([nH]c2cc1)c(c1c(cncc1)c3C)C	650261	1	4.385	290.359
O(C)c1cc(ccc1OC)\C=C\1/C[C@H]2[C@H]3[C@H](CC[C@]2(C)C/1=O)[C@@]1(C(=CC(=O)CC1)CC3)C	716259	1	5.452	434.567
O1OC2(OOC13CCC(CC3)C)CC[C@]1([C@@H](C2)C[C@@H](OC(=O)C)[C@@H]2[C@@H]3CC[C@H]([C@@H](CCC(=O)NCC)C)[C@@]3(C)[C@@H](OC(=O)C)C[C@@H]12)C	720303	1	4.759	661.866
O=C1N(c2ccc([N+](=O)[O-])cc2N)C(=O)CCC1	660300	0	0.594	249.223
O=C(N1CCC(CC1)C)c1ccccc1	27996	0	2.413	203.28
[truncated: 11,665 more rows]

## Sheet: test-nci(4555)
mol	NSCID	classification	ALogP	Molecular_Weight
ClC=1C(=O)N(N=CC=1Cl)c1ccccc1	642642	1	2.215	241.073
O=C(N(C)c1ccccc1)C1CC1	126984	0	1.914	175.227
O(C)c1ccc(cc1)[C@@H]1N(N=C(C1)c1ccc(Nc2nc(nc(n2)Nc2ccccc2)Nc2ccccc2)cc1)C(=O)C	743536	0	7.064	570.644
Clc1cc(Cl)c(F)cc1[C@@]1(O)N(N=C(C1)c1ccccc1)C(=O)COc1ccc(Cl)cc1	742092	0	6.06	493.742
O=C(NCC[NH+](C)C)c1c2nc3c4c(ccc3nc2ccc1)cccc4	617977	1	1.754	345.418
O=C1N=C(N(c2c1cccc2)C)Cc1ccccc1	127745	0	2.734	250.295
Cl[C@@H]1CS(=O)(=O)C[C@H]1O	35359	0	-0.219	170.615
FC(F)(F)c1cc2nc(Nc3cc(OC)c(OC)c(OC)c3)c(nc2cc1)C	631582	1	4.559	393.36
S1C(C(OCC)=O)=C(NC1=S)C	97390	0	1.837	203.282
[n+]1(c2n(-c3c(cccc3)C(NCCc3ncccc3)=C2C#N)c2c1cccc2)C	694259	1	4.741	378.449
Clc1ccc(cc1)C(C(OCC)=O)C(OCC)=O	106645	0	2.913	270.709
Clc1ccc(cc1)C=1C(=NN(CCOC(=O)CCC(=O)[O-])C(=O)C=1C#N)c1ccc(Cl)cc1	362453	1	2.51	485.296
S1C=2N(N=C1C)C(=O)C([N+](=O)[O-])=C(N=2)\C=C\c1ccccc1	677196	1	2.458	314.319
O(C[C@H]1[C@H](COC(=O)C)[C@@H](C=C[C@H]1C)C)C(=O)C	527	0	1.741	254.322
Brc1cc2oc(nc2cc1)N	26185	0	1.899	213.031
O=C1NC(=O)c2c1c([N+](=O)[O-])ccc2	5393	0	0.55	192.128
O=C1Nc2c(cccc2)C([O-])=C1N=Nc1cc(C)c(N=Nc2ccc(cc2)C(=O)N(C)C)cc1	58052	0	4.354	453.473
S=C1N(OC(=O)CCc2ccccc2)C(=Nc2c1cccc2)c1ccccc1	685461	1	5.383	386.466
O=C1c2c(cccc2)C(=O)C1C(=O)CC	5748	0	1.698	202.206
Clc1ncnc2n(cnc12)Cc1ccc(cc1)CCl	731409	1	3.028	293.151
S(C1=Nc2c(cccc2)C(=O)N1N)C1=Nc2c(cccc2)C(=O)N1N	702030	1	2.282	352.37
S([C@H]1CC(=O)N(C1=O)c1ccc(cc1)C)c1ccccc1N	150534	0	2.807	312.386
O1[C@@H](COC1(c1ccccc1)c1ccccc1)COC(=O)Nc1ccccc1	39110	0	4.524	375.417
S(C)c1ncnc2n(cnc12)[C@H]1OCCC1	44579	0	1.323	236.293
O1CC(COC1CCC)(CCCC)CC	6639	0	3.746	214.344
O=C1c2c(C(=O)c3c1c([N+](=O)[O-])ccc3)c(N)ccc2N	81260	1	1.209	283.239
O=C1c2c(nccc2)-c2nc(cc3c2c1nc1c3cccc1)CCCCCCC	697270	1	6.232	381.47
Brc1cc(C(=O)N)c(NC(=O)\C=C\c2ccccc2)cc1	748146	1	2.833	345.191
O=C1NC(=O)NC(=O)C12CCCC[C@H]2C	117435	0	1.081	210.23
O1C[C@@H](C2=C1c1c(c3c(cc1)C(CCC3)(C)C)C(=O)C2=O)C	686518	1	3.761	296.36
O(C)c1ccc(cc1)C\C(=N/O)\c1ccc(OC)cc1	26667	0	3.303	271.311
O1CCN(CC1)C(OCCCCCCCCCCCC)=N	44230	1	4.943	298.464
O1C2=C(C=C(C3=Cc4c(OC3=O)cccc4)C1=O)[C@H](Oc1cc(C)c(cc12)C)OC(=O)C	747824	0	4.289	430.406
Clc1cc2N=C(N(c3n(ncc3CC(OCC)=O)C)C(=O)c2cc1)c1ccccc1	749535	0	3.953	422.864
O=C1N(CO)[C@H](CC(C)C)C(=O)N[C@@H]1CC(C)C	56829	0	1.2	256.341
Clc1cc(N2CCN(CC2)C(=S)c2sccc2)ccc1	83475	0	4.914	322.876
S\1\C(\SS/C/1=C\C(SC)=O)=C\C(SC)=O	677907	1	3.864	296.473
O1c2cc([C@H](C)c3ccc(OCC)cc3)c(OC)cc2OC1	353648	1	4.14	300.349
O=C(NNC(=O)C)c1ccncc1	36084	0	-0.944	179.176
Cl\N=C\1/C=C/C(=N\Cl)/C=C/1S(=O)(=O)[O-]	361464	0	-1.233	254.071
O1[C@@H]2C=3[C@@H]([C@@H](OC(=O)CCCC)[C@H](OC(=O)\C(=C\C)\C)C=3C)[C@](OC(=O)C)(C[C@@H](OC(=O)CCCC)[C@@]2(O)[C@](O)(C)C1=O)C	299934	1	3.841	622.7
O=C/1Nc2c(cccc2)\C\1=C/1\Nc2c(cccc2)\C\1=N\OCC(O)(C)C	717836	1	2.025	349.383
O=C1N(C(C)(C)C)C(=O)c2c1cccc2	55128	0	1.793	203.237
Clc1cc(Cl)ccc1-c1nc(n(c1)-c1ccccc1)-c1cc([N+](=O)[O-])ccc1	745619	1	6.594	410.253
s1c2c(nc1SCC(=O)[O-])cccc2	11891	0	1.004	224.279
S1C(=S)NN=C1SC[C@@H](C)c1ccccc1	4981	0	4.862	268.421
BrC=1C(Oc2c(cc(Br)c(O)c2Br)C=1C)=O	749198	0	4.053	412.857
Clc1ccccc1C(=O)c1cc(Cl)ccc1NC(=O)C[NH+]1CCN(CC1)C(=O)C=1c2nc(cn2C=CC=1)C(C)(C)C	743120	1	3.579	593.524
OCc1c2[nH]c3c(c2c2c(c1)ccnc2)cccc3	631390	1	2.476	248.279
P(OCC)(OCC)(=O)\C(=C\c1ccoc1)\C#N	655958	0	0.924	255.207
O=C1CCCC[C@]1(C(OCC)=O)C	18913	0	1.911	184.232
o1cccc1C(=O)CCC	21612	0	2.088	138.164
O1[C@H]2[C@@H]3[C@H]([C@@H]1C=C2)C(=O)N(\N=C\c1c2c(ccc1)cccc2)C3=O	60362	0	1.821	318.326
O1C[C@]2([C@H](CC1=O)CC[C@H]1[C@@H]3CC[C@](O)(C)[C@]3(CC[C@@H]12)C)C	67068	0	3.06	306.44
Oc1ccc(cc1C)C1(CCCCC1)c1cc(C)c(O)cc1	73731	0	5.748	296.403
O1\C(\N=C(OC)C1=O)=C(/c1ccccc1)\c1ccccc1	85154	0	3.708	279.29
Clc1ccc(cc1)-c1c2c([nH]nc2N)nc(N)c1C#N	701017	1	2.168	284.704
O1C[C@]23[C@@H]([C@H](O)[C@@]1(O)[C@@]14[C@@H]2CC[C@@H](C1)C(=C)C4=O)C(C=CC3=O)(C)C	637462	1	1.312	344.402
[nH]1c2c3c4c([nH]c3cnc2c2c1cccc2)cccc4	623112	1	4.094	257.289
Oc1c(cccc1C[NH+](C)C)-c1ccccc1	10618	0	1.619	228.31
[NH+]1=C(N)/C(/NC12CCCCC2)=C(/C#N)\C#N	742278	0	0.2	216.262
O=C1NC(=O)NC2=C1CCCCCC2	71855	0	1.469	194.23
O=C(/C(/N(C)C)=C/C(=O)c1ccccc1)c1ccccc1	39989	0	3.358	279.333
Fc1cc(ccc1)C=1Nc2nc(ccc2C(=O)C=1)C	676191	1	2.838	254.259
S=C1N=C(Nc2n(cnc12)[C@@H]1O[C@@H](C[C@H]1O)CO)N	102635	0	-0.908	283.307
O(C[C@H](O)C[NH+]1CCN(CC1)c1cc(ccc1)C)c1cc2c(cc1)cccc2	91404	0	2.904	377.499
O(C)C1=CC=C2c3c(cc(OC)c(OC)c3OC)CC[C@H](NC(=O)COCC)C2=CC1=O	353494	1	2.129	443.49
S(c1c([N+](=O)[O-])cc(cc1[N+](=O)[O-])C(OCC)=O)c1ncnc2nc[nH]c12	244708	1	2.412	390.331
s1cc(nc1N)-c1ccccc1C	2524	0	2.513	190.265
O1[C@@H]2[C@H]3[C@@H]([C@@]1(C)[C@]1(C[C@H]1C=C)C2=O)C(=O)c1c(C3=O)c(O)ccc1O	724979	1	1.096	340.327
O(C)c1cc(ccc1OC)CCNC1=CC(=O)CCC1	352105	0	2.263	275.343
Brc1c(Br)c(Br)c2CC(Oc2c1OC[C@H](O)C[NH+]1CC[NH+](CC1)C)(C)C	741080	1	1.163	559.131
S(Cc1cc(F)ccc1)c1nc(nc2n(cnc12)CCCC)N	49819	0	3.944	331.411
S(C)C1=CC=C2c3c(cc(OC)c(OC)c3OC)CC[C@@H]([NH2+]Cc3ccc([N+](=O)[O-])cc3)C2=CC1=O	648783	1	3.259	509.594
[NH3+]CCCCCCCC[NH3+]	45785	0	-1.02	146.274
Clc1cc([N+](=O)[O-])cc(Cl)c1O	4123	0	2.811	207.999
Fc1cc2c(C=3N(CCCN=[N+]=[N-])C(=O)c4cc(OC)c(OC)cc4C=3C2=O)cc1	740524	1	3.213	408.382
O(CCOC)Cn1c2ncnc(N)c2c(C#N)c1NN	748889	0	-0.459	277.283
S1CCN=C1SC[NH+](C)C	14532	0	0.42	177.311
s1c(nnc1N1[C@@H](S[C@H](CC(OC)=O)C1=O)c1ccc(F)cc1)COc1ccc(F)cc1	746760	0	3.975	477.504
O(C(=O)C)c1c(OC)cc(cc1OC)C(=O)[O-]	15296	0	-0.28	239.201
O[C@@]1([C@H]2CC[C@@H](C1)C2)c1ccccc1	87592	0	2.683	188.266
O=C1N(C2=CC[C@H]3[C@@H]4CC[C@@H](C(=O)C)[C@]4(CC[C@@H]3[C@]2(CC1)C)C)C	38723	0	2.744	329.476
O1[C@@](C)([C@@H]1C(OCC)=O)c1ccccc1	27905	0	1.877	206.238
s1cccc1C(=O)CC[NH+]1CCCC1	12227	0	0.677	210.316
Clc1ccc(cc1)C(=O)\C(=C/c1c2c([nH]c1-c1ccccc1)cccc2)\C(OCC)=O	749029	1	6.634	429.895
S1c2c(cccc2)C(O[C@H]1c1ccccc1)=O	58109	0	3.828	242.293
n1c(N)c2N=C3[C@@H](CCc4c3cccc4)[C@H](Nc2nc1N)c1ccccc1	749652	1	3.666	356.424
S(Cc1ccccc1)C(SCc1ccccc1)[C@H](O)[C@@H](O)[C@@H](O)COC(=O)c1ccccc1	86746	0	4.747	484.628
S(C(C)C)CCCC(=O)[O-]	35365	0	0.098	161.242
O(CC)C(=O)/C(/n1c2ncnc(N)c2nc1)=C\C(OCC)=O	678994	1	0.403	305.289
O1CO[C@@H]([C@@]2(OCC(=C)[C@@H]2C)O)[C@H](O)[C@H]1C1CC(=O)NC(=O)C1	355461	1	-1.268	327.33
O=[N+]([O-])c1c2c([nH+]c3c(cccc3)c2NCCC[NH2+]CCCCCC)ccc1	673791	1	4.007	382.499
Clc1ccc(cc1)C(SCC=C)SCC=C	40458	0	5.09	270.841
O(C(=O)C)c1cc2c(-n3nnc4c3c(C2=O)c(NCC[NH+](CC)CC)cc4)cc1	699152	1	1.643	394.447
O1CCN(CC1)c1nc(nc(n1)NO)NO	746932	0	0.919	228.209
O=C1NC(=CC(C(OCC)=O)=C1C#N)C	17505	0	0.193	206.198
ClC[C@H]1c2c3c(cccc3)c(N)cc2N(C1)C(=O)\C=C\c1ccc(NC(=O)C)cc1	700013	1	2.949	419.903
O(C)c1ccc(cc1)CNC1=C(NC(=O)C)C(=O)c2c(cccc2)C1=O	651766	1	1.384	350.368
O1c2c([C@@]3(O)[C@@]1([C@@H]([C@@H](C(=O)N(C)C)[C@H]3O)c1ccccc1)c1ccc(OC)cc1)c(OC)cc(OC)c2	326408	1	2.737	505.559
S(P1(=S)OCC2(CCC=CC2)CO1)[C@@H](CC(OCC)=O)C(OCC)=O	30516	0	3.073	408.47
Clc1cc(S(=O)(=O)[O-])c(N)cc1CC	81226	0	-0.222	234.68
ClCCN(CCCl)c1ccc(cc1)\C=N\Nc1c2c([nH+]cc1)cccc2	313935	1	5.539	388.314
O1[C@H](C)C(=O)CC[C@H]1O[C@H]1[C@H](O[C@H](O[C@H]2[C@H](O[C@H](O[C@@H]3c4c(cc5c(C(=O)c6c(cccc6O)C5=O)c4O)[C@H](C(OC)=O)[C@](O)(C3)CC)C[C@H]2[NH+](C)C)C)C[C@H]1O)C	654508	1	1.121	812.876
O1c2c3-c4cc(OC)c(OC)cc4C[C@H]4[N@@H+](CCc(c34)cc2OC1)C	251699	1	1.774	340.393
O=[N+]([O-])c1c2c(ccc1)cncc2	3017	0	1.482	174.156
Clc1ccc(cc1)CCCC(=O)[O-]	90008	0	1.597	197.638
O1[C@@H](CC(CCC\C(=C\C=C\[C@H](CCCc2ccoc2)C)\C)=C)[C@@H](O)[C@@H](C)C1=O	701649	1	6.283	400.551
O1CC2=C(C=C3N(Cc4c3nc3c(cc(OC)cc3)c4)C2=O)[C@@](O)(CC)C1=O	111533	1	1.729	378.378
O1C[C@H]2O[C@H](OC)[C@@H]([NH3+])[C@@H](O)[C@@H]2O[C@@H]1c1ccccc1	42332	0	-0.981	282.312
O1c2cc(OC)ccc2[C@H]2Oc3c4c(cccc4)c(OC)cc3[C@@H]2C1	740815	1	3.816	334.365
S(Cc1ccc([N+](=O)[O-])cc1)Cc1ccc([N+](=O)[O-])cc1	43066	0	3.751	304.321
S\1C2=C(N=C(NC2=O)C)N(CCC)/C/1=C(/C#N)\C#N	745296	0	1.265	273.314
S(c1n(cnc1[N+](=O)[O-])C)c1nc(nc2n(cnc12)CCC)N	44584	0	1.927	334.357
O(Cc1cc(ccc1)COc1ccc(cc1)C(=[NH2+])N)c1ccc(cc1)C(=[NH2+])N	727667	1	2.87	376.452
O1c2c(c(cc3c2C(=O)c2c(c(cc([C@H]4O[C@H](C)[C@@H](O)[C@]([NH+](C)C)(C4)C)c2O)[C@@H]2O[C@H](C)[C@@H](O)[C@@H]([NH+](C)C)C2)C3=O)C)C(=O)C=C1/C(=C/C)/C	295565	1	0.82	690.822
Oc1ccccc1-c1[nH]c2cc(C)c(cc2n1)C	59779	0	4.001	238.284
O1[C@@H]([C@H](O)C[C@H](C)[C@H]2[C@@]34[C@@](CC2)(C3)[C@]2([C@H](CC4)[C@@]3([C@@H](C[C@H]2O[C@H]2O[C@H](COC(=O)C)[C@@H](O)[C@@H](O)[C@H]2O)C(C)(C)[C@@H](OC(=O)C)CC3)C)C)C1(C)C	642299	1	3.194	720.93
O(C)c1ccc(cc1)C(=O)c1ccc(-n2c3c4c(ccc3c3c2cccc3)C(=O)C=CC4=O)cc1	704282	1	6.421	457.476
O=C1[C@@H](CCC[C@H]1C[NH+](C)C)C[NH+](C)C	38525	1	-1.708	214.348
Brc1c2c(nccc2)c(OS(=O)(=O)C)cc1	110562	0	2.323	302.144
O1c2n(nc(c2[C@@H](C(C#N)=C1N)c1ccc([N+](=O)[O-])cc1)C)-c1ccccc1	298892	0	3.39	373.365
S=C(Nc1ncccc1)N	176341	0	1.468	153.205
O(C)c1cc(ccc1O)CCNC1=CC(=O)c2ncccc2C1=O	677944	1	1.917	324.331
Oc1c(cc([N+](=O)[O-])cc1[N+](=O)[O-])C(C)C	5735	0	2.571	226.186
O(C)c1cc2c(C=3N(CCC[NH2+]CCO)C(=O)c4c(C=3C2=O)cccc4)cc1	740650	1	0.094	379.429
O(C(=O)\C=C/C(OC)=O)C	5161	0	0.49	144.125
s1ccnc1NS(=O)(=O)c1ccc(N=NC=2C(=O)N=C(NC=2N)N)cc1	92598	0	0.381	392.416
O1c2c(OC1)cc1c(c2)/C(/C2=C1N(C)C(=O)c1cc(OC)c(OC)cc12)=C/[C@H]([NH3+])CCCC[NH3+]	730436	1	-0.113	465.541
O1[C@](CC(=C)C1=O)(COc1cc2OC(=O)C=Cc2cc1)c1ccccc1	668265	1	3.924	348.349
S=C(NCCCCNC(=S)[N-]\N=C(/C)\c1ncccc1)[N-]\N=C(/C)\c1ccccc1	667879	1	5.146	439.6
O(CC(O)COc1ccccc1C)c1ccccc1C	87019	0	3.907	272.339
O(C(=O)c1ccccc1C(=O)[O-])[C@H]1[C@H]2CC[C@@H](C1)C2	167974	0	1.442	259.277
BrCCS(=O)(=O)CCBr	84172	1	1.398	279.978
Clc1cc2[nH+]ccc(NC[C@@H](O)C[NH+](CC)CC)c2cc1	14203	0	1.666	309.834
Brc1c(Br)c(Br)c2CC(Oc2c1OC[C@H](O)C[NH+](CC)CC)(C)C	741082	1	3.464	531.097
S(=O)(=O)(N)c1ccc(N2N=C(C[C@H]2c2ccc(OC)cc2)c2c3OC(=O)C=C(c3ccc2O)C)cc1	747562	0	4.144	505.542
S1c2c(C(=O)c3c1cccc3)c(NCC[NH+]1CCCCC1)ccc2C	15791	1	3.312	353.501
[NH2+](Cc1cc(ccc1)C[NH2+][C@@H]1[C@H]2CC[C@H](C2)[C@@H]1c1c2c([nH]c1)cccc2)[C@H]1[C@H]2CC[C@H](C2)[C@H]1c1c2c([nH]c1)cccc2	704563	1	4.937	556.783
O(C)c1ccc(OC)cc1[C@H]1CCc2c3c(nc(nc3N)N)ncc2C1	714362	1	2.764	351.402
Clc1ccc(N2[C@@H](N([O-])C(=O)Nc3ccc(Cl)cc3)C(N(CC(=O)N\N=C\C=C\c3oc([N+](=O)[O-])cc3)C2=O)(C)C)cc1	748695	1	3.841	629.428
O=C1NCC(CN1)(CC)CC	23090	0	1.014	156.225
O1[C@@H]([C@H](O)[C@@H](O)[C@@H](O)[C@H]1OC(=O)C)[C@@H]1c2c(C(=O)c3c1cccc3O)c(O)cc(c2)C	727258	1	1.237	430.405
ClCc1cc(O)c2c3c(ccc2c1)C(=O)c1c(cccc1O)C3=O	664213	1	3.832	338.741
O1C(c2c3c(cccc3ccc2)C1=O)(c1ccc(OC)cc1)c1ccc(OC)cc1	719488	1	5.366	396.435
S=C(Nc1ccc([N+](=O)[O-])cc1)[N-]\N=C(\c1ccccc1)/c1ncccc1	668330	1	5.395	376.412
O(C(=O)C=1C2=Nc3n(N=C2C(=CC=1)C(OC)=O)c(nn3)N)C	382954	0	1.023	302.246
OCC#Cc1ccccc1C#C\C=C/C#Cc1ccccc1N	730085	1	4.236	297.35
O(C)c1cc2c(NC(=CC2=O)c2cc(N(C)C)ccc2)cc1OC	654987	1	3.091	324.374
BrC([C@@H](Br)CC\C(=C\CBr)\CBr)(C)C	657137	1	5.171	455.85
O1[C@@H]([C@H](O)[C@@H](O)[C@@H](O)[C@H]1OC(=O)C)[C@H]1c2c(C(=O)c3c1cccc3O)c(O)cc(c2)C	727259	1	1.237	430.405
S(CC(=O)[O-])C(SCC(=O)[O-])=S	30797	0	-1.306	224.278
Clc1cc([N+](=O)[O-])c([N+](=O)[O-])cc1Cl	22945	1	2.947	236.997
O1[C@]2(C(=CC=C3C(C2)=C(OC(=O)C)C(=O)C(=C3)C(C)C)C(CC1=O)(C)C)C	629595	1	3.12	370.439
O(C)c1ccc(N=Nc2ccc(nc2N)N)cc1	78130	0	2.617	243.265
O(CCCn1ccnc1)c1ccc(cc1OC)\C=C\1/C[C@H]2[C@H]3[C@H](CC[C@]2(C)C/1=O)[C@@]1(C(C[C@@H](OC(=O)C)CC1)=CC3)C	730461	1	5.4	572.734
S=C(N1CCCCC1)[N-]\N=C(/C(=N/[N-]C(=S)N1CCCCC1)/C)\C	693320	1	4.946	366.548
O(Cc1ccccc1)C(=O)NCC(=O)N[C@@H](Cc1nc[nH]c1)C(=O)[O-]	117524	0	-1.263	345.33
O1C(=CC=CC1=O)C#CC#CCCCO	727039	1	1.907	202.206
o1nc(cc1-n1nc2c(CCC[C@@H]2C)c1N)-c1ccccc1	749517	0	3.942	294.351
FC(F)(F)c1c2nc(cc(c2ccc1)[C@H](O)CC[NH2+]C(C)(C)C)C(F)(F)F	305819	1	3.119	395.363
O=C\1NC(=O)NC(=O)/C/1=C\Cc1ccccc1	98004	0	1.32	230.219
Clc1cc(SC)c(S(=O)(=O)\N=C(/NCC=C)\[N-]\N=C\c2oc([N+](=O)[O-])cc2)cc1C(=O)Nc1ccc(Cl)cc1	728512	1	4.57	610.47
O1[C@@H](COC)[C@@]2([C@H]([NH2+]C)C(=O)[C@@H](C)[C@@]2(O)[C@H](OC)C[C@@H]([C@H](O)\C=C\C=C\CNC(=O)C([C@H](O)\C(=C\C=C\C=C\Cc2oc(nc2)C)\C)(C)C)C)C1=O	606307	1	0.34	728.892
Oc1c(O)cc(cc1O)C(OCCCCCCCC)=O	97419	1	4.112	282.332
Brc1ccc(Nc2nc(N)c(N)cn2)cc1	81915	0	1.916	280.124
Clc1cc2nc([nH]c2cc1)C(Cl)(Cl)Cl	158057	0	3.949	269.943
N=1C(CN(C(C)C)C=1CCCCCCCCCCCCC)(C)C	17743	1	6.652	322.572
O\N=C(/CC)\c1ccccc1	406909	0	2.304	149.19
O1C[C@H]2[C@@H]([C@H](c3c(cc4OCOc4c3)[C@H]2[NH2+]CC[NH+]2CCOCC2)c2cc(OC)c(O)c(OC)c2)C1=O	651856	1	-0.937	514.567
Clc1cc(ccc1)/C(=N/NC(=O)c1ccncc1)/C	63136	0	2.177	273.718
O1c2c3c(cccc3O[C@@H]3O[C@H](C)[C@@H](O)[C@](O)(C)[C@H]3O[C@H]3O[C@H](C)[C@@H](O)[C@@H](OC)[C@H]3[NH3+])c(O)c3c2-c2c(c(ccc2OC3=O)C)C1=O	369327	1	0.881	654.638
Clc1ncnc2n(cnc12)Cc1cc(ccc1)CCl	733885	1	3.028	293.151
Clc1ccc(OS(=O)(=O)c2c3ncccc3ccc2)cc1	12544	0	3.815	319.763
S(F)(=O)(=O)c1ccc(cc1)CCCCCCc1ccc(N2C([NH+]=C([NH+]=C2N)N)(C)C)cc1	132279	1	4.63	461.596
O1[C@@H]([C@H](CC)C)C(=O)NCC(=O)N(C)[C@@H](CC(C)C)C(=O)NCC(=O)N(C)[C@@H](C(C)C)C(=O)N(C)[C@@H](Cc2ccc(OC)cc2)C(=O)N[C@@H](C)C(=O)C(C)(C)C(=O)N[C@@H](C)C(=O)N[C@H](CC)[C@H](C)C1=O	606195	1	3.024	985.217
O=C1[C@H]2[C@H]3[C@@H]4N(c5c([C@]46[C@@H](N(CC6)C1=O)C2)cccc5)C(=O)C[C@@H]3OCC(=O)[O-]	123793	0	-2.023	395.385
O\N=C(\CCCCCCCCCCC)/c1ccccc1	101143	0	6.409	275.429
O(CCCC(=O)Nc1cc(n(c1)C)C(=O)Nc1cc(n(c1)C)C(=O)NCCC[NH+](C)C)c1cc2N=C[C@H]3N(CCC3)C(=O)c2cc1OC	709358	1	0.339	661.771
O(C)c1c(OC)cc(cc1OC)C(=O)c1ccc(OC)cc1	638498	1	3.168	302.322
n1cc2[C@H]3C[C@@H]([C@H](c2cc1-c1ncccc1)Cc1cc(ccc1)C[C@@H]1[C@@H]2C[C@H](c4c1cc(nc4)-c1ncccc1)C2(C)C)C3(C)C	681462	1	8.752	602.81
Brc1cc(cc(C[NH+](Cc2cc(cc(Br)c2O)C(C)(C)C)C)c1O)C(C)(C)C	48881	1	5.74	514.314
FC(F)(F)c1ccccc1C#C\C=C\C#Cc1ccccc1N1CCCCC1=O	735435	1	5.977	393.401
Oc1c2c(ccc1)C(c1c(C2=O)c(O)ccc1)C(=O)CCCCCC(=O)C1c2c(C(=O)c3c1cccc3O)c(O)ccc2	641176	1	5.778	576.592
O1CCN(CC1)c1c2[n+](onc2c([N+](=O)[O-])cc1)[O-]	228082	1	-1.547	266.21
ClC1=C(Nc2ccc(S(=O)(=O)c3ccc(NC4=C(Cl)C(=O)c5c(cccc5)C4=O)cc3)cc2)C(=O)c2c(cccc2)C1=O	39355	1	5.704	629.466
O=C1N(CCCC1)CCCCC#Cc1ccccc1C#Cc1ncccc1	744169	0	5.085	356.46
Brc1ccc(N=Nc2ccc(O)cc2O)cc1	402590	1	4.463	293.116
O(C(=O)C)c1ccc(cc1)[C@]12c3c(cc(OC(=O)C)cc3)[C@@]1(OC(=O)C)c1c2cccc1	28365	1	3.51	428.433
S1SC=C2N(C)C(=O)C(NC(=O)C)=C12	3927	1	-1.006	228.291
O1c2c(C=C[C@@]1(CC\C=C(\C)/C)C)c1[nH]c3cc(O)c(cc3c1cc2)C	654282	1	6.248	347.45
O=C1N(c2c(cccc2)[C@@H]1c1ccccc1)Cc1ccccc1	9515	0	4.103	299.366
o1c(ccc1[N+](=O)[O-])C(=O)CC	21606	0	1.65	169.135
O=C1C(=O)C(N)=C1N[C@@H]1C[C@@H](C=C1)CO	747709	0	-1.556	208.214
O=C([O-])[C@H](O)c1cc([N+](=O)[O-])ccc1	10987	0	-0.738	196.137
Oc1ccc(N=Nc2ccccc2C(=O)[O-])cc1	77376	0	2.113	241.222
OCC[N@H+]([C@@H]([C@@H](O)c1ccccc1)c1ccccc1)CC	33978	0	1.253	286.389
Clc1cc2c3cc(c4c(nccc4)c3[nH]c2cc1)C(=O)NCC[NH+](C)C	741237	1	1.96	367.852
[nH+]1c2c(cccc2)c(N(C)c2ccccc2)c2c3c([nH]c12)cccc3	727482	1	5.555	324.398
Oc1cc(ccc1)\C=N\N=C\1/NC=C([N+](=O)[O-])C=C/1	52430	0	1.082	258.233
O1C[C@H](O)[C@H](OC(=O)c2ccccc2)[C@H](OC(=O)c2ccccc2)[C@H]1OC	92420	0	2.492	372.369
BrC1=CC2(C3=C(NCC2)c2nccc4c2c(nc2c4cccc2)C3=O)C=C(Br)C1=O	719979	1	3.29	523.176
S(=O)(=O)(NNC(=O)c1cccnc1)c1ccccc1	10782	0	0.424	277.299
BrC(CBr)CBr	78932	0	2.639	280.784
O(CC[NH+]1CCCC1)c1cc2CC[C@H]3[C@@H]4CC(=O)N(CCCC)C(=O)[C@]4(CC[C@@H]3c2cc1)C	671765	1	3.543	453.637
Clc1cc(Cl)ccc1CN1CCC(=O)NC1=O	24134	0	2.206	273.115
S1\C(=C(\C)/c2cc(OC)ccc2)\C(=O)[N-]C1=S	108937	0	3.375	264.343
Clc1cccc(Cl)c1\C=N\Nc1[nH]c(cc1C(OCC)=O)-c1cc(OC)c(OC)cc1	740127	1	5.976	462.326
Clc1ccc(Oc2ccc(NC(=O)\C=C\C(=O)[O-])cc2)cc1	137041	0	1.944	316.716
O=C(Nc1ccccc1N)c1ccc(cc1)C(C[NH2+]Cc1ccccc1)=C	730002	1	2.27	358.456
O=C1C=2NC(=O)C=CC=2C(=O)C([O-])=C1CCCCCCCCC(O)(CCCCC)CCCCC	122057	1	5.771	472.637
S=C1N(c2ccccc2)C(=S)N(C=2N=C(N)N(C(=N)C1=2)c1ccccc1)c1ccccc1	746681	0	6.859	454.57
O(CC)C(=O)[C@H](N=Nc1ccccc1)C(=O)C	17512	0	2.609	234.251
S(CC[NH+](CC)CC)c1[nH]c2c(n1)cccc2	44960	0	1.704	250.383
P(OC[C@@H]1O[C@@H](N2C=CC(=NC2=O)N)[C@@H](O)[C@@H]1O)(OC[C@@H]1O[C@@H](N2C=C(F)C(=O)NC2=O)C[C@@H]1O)(=O)[O-]	708446	1	-5.319	550.366
S=C(NC1CCCCC1)[N-]\N=C(/c1ccccc1)\c1ncccc1	689540	1	5.504	337.462
S(CC[NH+](CC)CC)C=1NC(=O)C(C#N)=C(N=1)c1ccccc1	744465	0	1.317	329.44
Clc1cc(Cl)ccc1OC1=CNC(=S)N=C1N	78393	0	2.729	288.153
O=C(Nc1cc2c(c([N+](=O)[O-])c1C)C(CC2(C)C)(C)C)C	16820	0	3.303	290.357
O=C(NCCC[NH+](CCCNC(=O)c1c2Nc3c(-c4nn(c(c24)cc1)CC[NH+](C)C)cccc3)C)c1c2Nc3c(-c4nn(c(c24)cc1)CC[NH+](C)C)cccc3	710551	1	0.787	756.961
[NH3+]C(CNc1ccccc1)(C)C	17713	0	0.387	165.255
[Sn](OC(=O)[C@@H]([NH3+])CSC)(OC(=O)[C@@H]([NH3+])CSC)(CCCC)CCCC	633515	1	0.886	503.308
O=C(N(CCNC(=O)CCCCCCCC)CC[NH3+])CCCCCCCC	647758	1	3.746	384.62
O1c2c3NC=Cc4nccc(c34)cc2OC1	699882	1	1.281	212.204
Brc1ccc(cc1)COc1cc(ccc1)C(=O)N[O-]	692756	1	2.457	321.146
[nH]1cc(nc1)C	40744	0	-0.001	82.1038
FC(F)(F)c1ccccc1C#Cc1ccccc1C#Cc1ccc(OCCCCCCOc2ccc(cc2)C#Cc2ccccc2C#Cc2ccccc2C(F)(F)F)cc1	742358	0	15.32	806.831
O(C)c1cc2N([C@@H]3[C@@]4([C@H]5[N@@H+](CC=C[C@@]5(CC)[C@H](C(OC)=O)[C@]3(O)C(OC)=O)CC4)c2cc1[C@@]1(c2[nH]c3c(c2CC[N@@H+]2C[C@H](CC)[C@H]([C@@H](C1)C2)C(C)(C)C)cccc3)C(OC)=O)C	663567	1	3.943	853.097
Fc1ccccc1C=1N(c2c(cc3OCOc3c2)C(=O)C=1)C(OC(C)(C)C)=O	701389	1	4.027	383.37
O(C)c1cc2c3c([nH]c2cc1)c(c1c(ccnc1)c3C)C	663334	1	4.037	276.332
O=C(C)c1cc(N)c(cc1)C	380875	0	1.309	149.19
O=C(C[NH+]1CC[NH+](CC1)CC(=O)c1ccccc1)c1ccccc1	13615	0	-0.333	324.417
O(N(C(=O)C)c1ccc(cc1)C(=O)N)C(=O)C	321816	0	-0.212	236.224
Fc1cc\2c(NC(=O)/C/2=C\c2[nH]c(C)c(C(=O)NCC[NH+](CC)CC)c2C)cc1	750690	1	1.437	399.482
O1[C@H](C[C@@H]([C@H]2[C@]34[C@](CC2)(C3)[C@]2([C@H](C=C4)[C@@]3([C@@H](C[C@H]2O)[C@@]2(C(C[C@H](OC2)c2ccccc2)=CC3)C)C)C)C1=O)\C=C(\CO)/C	683690	1	4.953	584.785
O(C)c1cc2c([nH+]c(cc2Nc2ccc(cc2)/C(=N/OC)/C)-c2ccccc2)cc1	727474	1	5.618	398.477
n1nnn(c1C)-c1ccccc1	23235	0	0.977	160.176
O(CC)C(=O)N1CC1	26962	0	0.39	115.13
O(Cc1ccccc1)c1cc(C)c([N+](=O)[O-])cc1	86149	0	3.777	243.258
O1[C@@](O)(\C=C\C=C/C=C\C=C\[C@H](NC(=O)\C=C\C=C\C=C\C=C\[C@]2(C(=C([O-])[C@@H](OC)[C@@H]2O)C1=O)C)c1ccccc1)C	236657	1	2.838	570.652
O=C(N)[C@H]1[C@@H]2C=C[C@H](C1)C2	53243	0	0.525	137.179
S1(=O)(=O)c2c(N[C@H]([C@@H]1c1ccccc1)c1ccccc1)cccc2	140247	0	4.207	335.419
S1C=C(N=C2C1=NCN=C2OC)N	216134	0	0.04	196.23
Clc1cc2NC(=O)N(c2cc1)C1CC[NH+](CC1)CCCC(c1ccc(F)cc1)c1ccc(F)cc1	335305	1	4.625	496.999
O=C1N(CCCNC(OCc2ccccc2)=O)C(=O)c2c1cccc2	93031	0	2.343	338.357
O(Cc1ccccc1)C(=O)NCC(=O)NCC(=O)[O-]	29727	0	-1.333	265.242
S(CCCC)c1[nH]c2c(n1)N(C)C(=S)N(C)C2=O	95884	0	3.625	284.401
n1c2c(cccc2)c(cc1)\C=C\c1cc(N)c(N(C)C)cc1	408400	1	3.418	289.374
O1[C@H]2[C@]34[C@@H]([C@@H](OC(=O)[C@@H](CC)C)C1=O)[C@H](C)[C@@H](O)[C@@](OC3)(O)[C@@H]4[C@@]1([C@@H](C2)C(=CC(=O)[C@@H]1O)C)C	238187	1	1.082	478.532
Clc1ccc(cc1)\C=C/1\C[NH2+]C\C(=C\c2ccc(Cl)cc2)\C\1=O	632838	1	3.469	345.242
O=C1N(C)C(=O)Nc2n(nc(c12)C(OCC)=O)C	73295	0	0.177	252.227
O[C@@H](CC)c1ccccc1	25504	0	2.126	136.191
S=C(Nc1cc(ccc1)C)[N-]\N=C(\c1ccccc1)/c1ncccc1	668327	1	5.986	345.441
Clc1cc(ccc1Cl)C(=O)CN(\C=C\C(=O)C(F)(F)F)c1ccc(cc1)C	733916	1	5.881	416.221
O1c2cc(ccc2OC1)C(=O)CNC(=O)Cc1ccccc1[N+](=O)[O-]	116562	0	1.991	342.303
ClCCCN1C2=C(c3c(cc(OC)c(OC)c3)C1=O)C(=O)c1cc(ccc12)C#N	734561	1	2.789	408.834
O\N=C/1\[C@H]2CCC[C@@H]\1CC=C2c1ccccc1	119577	0	3.425	227.302
O=C1N(c2n(c3c(n2)N(C)C(=O)N(C)C3=O)-c2c1cccc2)CC[NH+](CC)CC	675574	1	0.454	397.451
[Re]123([P+](c4ccccc4)(c4ccccc4)c4ccccc4)([NH+]=O)(c4c1cc2[c-]34)[C@@-](O[Sn](c1ccccc1)(c1ccccc1)c1ccccc1)[O-]	621336	1	8.747	934.599
O(C)c1cc(ccc1OC)CC[NH+]1[C@@H](CCC[C@H]1CC(=O)c1ccccc1)CC(=O)c1ccccc1	96937	0	4.614	486.622
O\N=C/1\CCCCC\1	6300	0	1.381	113.158
S=C1NC(=O)CN1	11772	0	-0.067	116.142
O1CCN(CC1)C1=NC(=O)/C(=C\Nc2ccccc2OC)/C([O-])=C1C(OCC)=O	746979	0	-0.046	400.405
O[C@H]1[C@H](CC[C@@H]1O)CCCCCCCCCCC(=O)[O-]	53903	0	2.206	285.399
O(\N=C(/C)\c1ccc([N+](=O)[O-])cc1)C(=O)N(C)C	107966	0	1.556	251.239
s1cccc1S(=O)(=O)Nc1ccc(cc1)C(OCC(=O)c1oc2c(c1)cccc2)=O	744257	0	3.81	441.477
O=C1[C@H](C[C@@H](C[C@H]1[C@H](O)CC1CC(=O)NC(=O)C1)C)C	185	1	0.933	281.347
o1cc(cc1)C(=O)C[C@@]1([C@H]2CCC=C(C(OC)=O)[C@@]2(CC[C@H]1C)COC(=O)C)C	688255	1	3.413	402.481
s1c(C(OCC)=O)c(nc1NC(=O)c1cc(OC)c(OC)c(OC)c1)C	745900	0	2.34	380.416
S(CC(=O)N\N=C/1\c2cc(F)ccc2NC\1=O)C1=Nc2c(cccc2)C(=O)N1c1ccccc1	718643	1	3.804	473.479
O1CCN(CC1)c1cc2nc(n(c2cc1)CCCCCOc1cc2N=C[C@H]3N(CCC3)C(=O)c2cc1OC)-c1ccc(OCc2ccccc2)cc1	744018	1	7.128	699.837
O1[C@H](CO)[C@@H](O)C[C@H]1n1c2[NH+]=CNC[C@@H](O)c2nc1	218321	0	-2.068	269.277
FC(F)(F)c1ccc(-n2c3ncnc(N)c3nc2)cc1	743765	0	2.283	279.221
S(=O)(=O)(N\N=C(/Cc1ccccc1)\C)c1ccc([N+](=O)[O-])cc1	22650	0	2.286	333.362
Brc1cc(N)ccc1	10298	0	1.831	172.023
[Se](C[C@@H](OC(=O)CC[Se]c1ccccc1)C(=O)NC(C)(C)C)C1=C(C)C(=O)c2c(cccc2)C1=O	748882	1	5.142	605.443
O=C1NC(=O)NC(=O)C1(CCC)CC=C	32302	0	1.266	210.23
S(SC=1NCCN=1)(=O)(=O)c1ccccc1	112801	0	1.805	242.318
n1c2N(c3c(cccc3)C(=N)c2c(cc1C)C)CCCCCCCCN1c2c(cccc2)C(=N)c2c1nc(cc2C)C	681455	1	9.03	556.743
O=C1C=2N3C[C@H]4[N@H+]([C@H]4[C@]3(OC)[C@H](C=2C(=O)C(N)=C1C)COC(=O)N)C	56410	1	-2.572	349.362
FC(F)(F)C(O)(C(=O)Cc1cc(cc(c1)CC(=O)C(O)(C(F)(F)F)C(F)(F)F)C(=O)CC(O)(C(F)(F)F)C(F)(F)F)C(F)(F)F	162047	1	5.458	702.288
Clc1c2nccc(c2ccc1)\C=C\1/N2CC(=O)[C@@H](C/1)CC2	132868	0	2.742	298.767
O=C1Nc2c(-n3c1c1c(cccc1)c3)cccc2C	734236	1	3.346	248.279
O(C)c1ccc(OC)cc1	7483	0	1.797	138.164
ClC=1Sc2n(C=1)c(\C=N\[N-]C(=[NH2+])N)c(n2)-c1cc([N+](=O)[O-])ccc1	722874	1	2.064	363.782
O(C(=O)C1=NN[C@@H](C(=O)c2ccccc2)[C@@H]1c1ccccc1)CC	679716	1	2.834	322.358
Clc1ccccc1N1CC[NH+](CC1)[C@H](C#N)C	88427	0	1.268	250.747
O1c2cc(ccc2OC1)[C@H]1Nc2nc(nc(N)c2N=C(C1)c1ccc([N+](=O)[O-])cc1)N	743965	0	2.751	419.393
ClCCN(CCCl)c1cc2c(CCC[C@@]2([NH3+])C(=O)[O-])cc1	62661	0	0.516	331.237
O=C1NC(=O)NC=C1NCc1ccccc1	118932	0	-0.193	217.224
S(=O)(=O)(n1c2c(cc(N(C(=O)CNC(=O)C(F)(F)F)CC=C)cc2OCc2ccccc2)c(c1)C)c1ccccc1	704216	1	5.625	585.594
O(c1ccc([N+](=O)[O-])cc1[N+](=O)[O-])c1cccnc1	117739	1	2.028	261.19
O1[C@H]2[C@@H](CC[C@H](C)[C@]3(O)C=CC(=O)[C@@]23C)[C@@H](C[NH+](C)C)C1=O	626676	1	-0.196	308.393
O=C1CCC=2C(=C1)CC[C@H]1[C@@H]3CC[C@@](O)(C)[C@]3(C=CC1=2)C	92858	0	2.972	284.393
Clc1sc(Cl)c2c1C(=O)C[C@H]2Cl	704130	1	2.712	241.522
O=C1N(CCC1)C=C	10222	0	-0.081	111.142
[NH2+]=C(NCCCCCCCCCCCC)c1ccc(N2CCN(CC2)c2ccc(cc2)C(=[NH2+])NCCCCCCCCCCCC)cc1	729171	1	11.896	661.061
o1c(ccc1[N+](=O)[O-])\C=C(/C#N)\c1[nH]c(nn1)Cc1ccccc1	720628	1	2.799	321.29
O=[N+]([O-])c1c2[nH]c3c(c2ccc1)ccnc3-c1ccccc1	620316	1	4.013	289.288
O=C1[C@H](CCN(C(=O)c2ccccc2)[C@@H]1CC)C(OCC)=O	100244	0	2.269	303.353
S(=O)(=O)(NN1CCCCCC1)c1ccc(cc1)C	132117	0	2.314	268.375
o1c2c(nc1N\N=C(/C)\c1ncnc(c1)C)cccc2	693637	1	2.428	267.286
Fc1ccc(N[C@H]2[C@@H]3[C@@H]([C@H](c4c2cc2OCOc2c4)c2cc(OC)c(O)c(OC)c2)[C@@H](OC3)O)cc1	660029	1	3.711	495.496
Clc1cc2c(nc(C[N@H+](Cc3ccccc3)C)c(C(OCC)=O)c2-c2ccccc2)cc1	748521	0	4.714	445.961
S1(=O)(=O)c2c3c(ccc2N(c2c1cccc2)C(=O)C)cccc3	40255	0	2.913	323.366
O(C(C)C)C(=O)Nc1cc(C)c(cc1)-c1ccc(NC(OC(C)C)=O)cc1C	57624	0	5.3	384.469
S(C)c1ccccc1C#Cc1ccccc1C#CCCCCN1CCCCC1=O	744163	0	6.349	401.564
O\1c2c(ccc(OC)c2)C(=O)/C/1=C\c1ccc(OCC(=O)c2ccccc2)cc1	743509	0	4.359	386.397
Brc1cc(Nc2ncnc3c2cc(OC)c(OC)c3)ccc1	669364	1	4.193	360.205
N(Nc1ccccc1C)c1ccccc1C	309	0	4.374	212.29
Fc1ccc(Nc2nc(nc(n2)Nc2ccc(F)cc2)Nc2ccc(cc2)C(=O)\C=C\c2cc(OC)c(OC)c(OC)c2)cc1	737231	1	8.392	610.61
O=C1N(C)C(=O)N(c2nc(n(c12)C)CCCc1nc2N(C)C(=O)N(C)C(=O)c2n1C)C	14411	0	0.827	428.445
Clc1ccc(N2C(=CC(NC2=S)(C)C)C)cc1	41051	0	4.38	266.79
O(C(=O)c1ccccc1)c1ccccc1OC	3795	0	3.245	228.243
O1C[C@@H]1CNc1c2c(C(=O)c3c(cccc3)C2=O)c(NC[C@@H]2OC2)cc1	380212	1	1.858	350.368
Clc1ccc([N+](=O)[O-])cc1C1=N\C(=C/c2ccc(N(CCC#N)CCC#N)cc2C)\C(=O)N1c1ccc(OC)cc1	640080	1	5.596	569.01
Clc1n(c2c(cc(OC)c(c2)C)c1\C=C\1/c2cc(O)c(cc2NC/1=O)C)C	734207	1	4.403	382.84
Clc1cc2c(N=C(SCC(=O)N\N=C/3\c4cc(F)ccc4NC\3=O)N(C2=O)c2ccccc2)cc1	718645	1	4.469	507.924
O1[C@@H](CC(=O)[C@@H](\C=C(/C)\[C@@H](O)[C@@H](OC)C(=O)[C@@H](C[C@@H](\C=C\C=C\C=C(/C)\[C@@H](OC)C[C@H]2O[C@](O)([C@@H](CC2)C)C(=O)C(=O)N2[C@@H](CCCC2)C1=O)C)C)C)[C@@H](C[C@H]1C[C@@H](OC)[C@H](OCCO)CC1)C	733504	1	6.164	958.224
O1NC(=O)C(C2CCCCC2)=C1N	50858	0	0.986	182.22
O1CC[NH+](CC1)Cc1ncccc1O	72987	0	-1.147	195.238
O1CC2=C(C=C3N(Cc4c3nc3c(c4)cccc3)C2=O)[C@@](OC(=O)C[NH2+]CCCC)(CC)C1=O	606499	1	1.693	462.518
O1[C@@H]2O[C@@]3(OO[C@]24[C@@H](CC[C@H]([C@@H]4CC3)C)[C@@H](C)[C@@H]1O[C@H]1O[C@@H]2O[C@@]3(OO[C@]24[C@@H](CC[C@H]([C@@H]4CC3)C)[C@H]1C)C)C	685988	1	4.008	550.681
[Se]1=2ON=C3CC(CC(=NO1)C=23)(C)C	328587	1	1.432	245.137
S=C(N(CCC)CCC)[N-]\N=C(/C)\c1ccccc1O	668294	1	4.742	292.42
Clc1nc(nc(n1)N(CC)CC)Nc1cc2OC(=O)C(=Cc2cc1)c1ccccc1	338963	0	5.801	421.879
O=[N+]([O-])c1ccccc1\C=N\N1CCCCCC1	82280	0	2.831	247.293
O(C)c1cc(NCCCNC(=[NH2+])NC(=[NH2+])NC(C)C)c2ncccc2c1	54848	1	1.467	359.469
o1c2cc(n(c2cc1\C=N/NC(=O)c1[nH]c2c3c(oc2c1)cccc3)C)C(OC)=O	745538	0	4.196	404.376
s1c2CCCCc2c2c1N=C(NC2=O)C(OCC)=O	310113	0	2.349	278.327
O(C)c1ccccc1C(OCCc1ccccc1)=O	6679	0	3.573	256.296
Clc1cc2[n+]([O-])c(C(=O)c3sccc3)c([n+]([O-])c2cc1Cl)C(F)(F)F	728083	1	4.091	409.167
Oc1c2c(NC(=O)C=C2C)c(cc1O)/C(=C(/NCC(C)C)\C)/C(OCC)=O	741203	1	2.557	374.431
S(C[C@H]([NH3+])C(=O)[O-])C1(c2c(-c3c1cccc3)cccc2)c1ccccc1	122406	0	1.428	361.457
S(c1ccc(OC)cc1)c1[nH]c(c2c1cccc2)C=O	749086	1	4.109	283.345
O=C1C=CC(=O)c2c1c1n(c3cc(ccc3c1cc2)C)C	661224	1	3.943	275.301
Clc1cc(ccc1Cl)Cc1nc2cc(Cl)c(Cl)cc2n1C[C@H]1[C@@H]2[N@@H+](CCC1)CCCC2	713549	1	6.248	498.295
[s+]1sc(nc1N(C)C)N(/C(/SC)=N/c1ccccc1)c1ccccc1	622580	1	6.077	387.565
O=C1N(NC(=O)c2ccncc2)C(=O)c2c1cc(C(=O)[O-])c(c2)C(=O)[O-]	745511	0	-3.144	353.243
O=C([O-])c1ccc(cc1)-c1ccccc1	23040	0	1.504	197.209
O(\N=C\c1cccnc1)Cc1ccccc1	66188	0	2.128	212.247
O=C1N(C)C(=NC(N)=C1NC=O)N	334326	0	-2.225	183.168
S(=O)(=O)(Nc1ccccc1)c1cc(N=N[C@H]2C(=NN(C2=O)c2ccc(S(=O)(=O)[O-])cc2)C)ccc1C	324572	0	1.513	526.565
O=C1CC[C@H](OCOC)\C=C/CCCC#C[C@@H]1C	658886	1	2.905	250.333
O(CC)c1ccccc1\C=C(\C#N)/C#N	176362	0	2.348	198.221
O=C1N(CC(C)=C)C(=O)N(CC(C)=C)C(=O)N1CC(C)=C	8189	0	3.147	291.346
ClC[C@H]1c2c(N(C1)C(=O)c1oc3c(c1)cc(OC)cc3)cc(N)cc2	695592	1	3.031	356.803
O=C1C=C(C[C@H](C1)C(C)C)C	10129	0	2.697	152.233
O(CC)C(=O)n1cccc1	26963	0	1.905	139.152
S=C1NC(=O)c2[nH]cnc2N1	36822	0	0.653	168.176
Brc1cc(cc(Br)c1O)\C=C/1\c2c(NC\1=O)c(Cl)c(Cl)cc2	748498	1	5.314	463.936
Clc1ccc(cc1)\C=C/1\CC[C@H](C[NH+]2CCOCC2)C\1=O	639517	1	1.611	306.807
OCCn1nnnc1Nc1c([N+](=O)[O-])cc([N+](=O)[O-])cc1[N+](=O)[O-]	116720	0	0.375	340.209
S(S\C(\OC)=N\c1ccccc1)C(C)C	261238	0	4.376	241.373
O(C)C1=C(N)C(=O)c2nc(ccc2C1=O)-c1nc(C(=O)[O-])c(C)c(-c2ccc(OC)c(OC)c2O)c1N	45383	1	0.319	505.456
O1N=C(C[C@@H]1c1ccc(N(C)C)cc1)c1cc(OC)c(OC)c(OC)c1	741941	0	3.335	356.416
O1[C@H]/2[C@@H]([C@H](OC(=O)C(C)C)C[C@]3(O[C@](O)([C@@H](OC(=O)C)C3)/C(=C\2)/C)C)C(=C)C1=O	322918	1	1.704	408.442
S1C(=NNC1=S)Nc1c2c(ccc1)cccc2	129267	0	3.918	259.35
O[C@@H](C#N)c1ccccc1	77668	0	1.091	133.147
O=C1C=C(C)C(=O)C=C1C	15309	1	1.58	136.148
O(CC)c1cc2c3c([nH]c2cc1)c(c1c(c[n+](cc1)C)c3C)C	650262	1	5.141	305.394
Fc1ccc(cc1)[C@@]1(OC(=O)c2c1cccc2)c1ccc(O)cc1C	682335	1	4.94	334.34
Clc1ccc(cc1)-c1nc2c(c3c1N=C(OC3=O)c1ccc(Cl)cc1)cc(Cl)cc2	741379	0	7.267	453.705
Oc1cc(O)ccc1\C=N\N=C/1\NC=C([N+](=O)[O-])C=C\1	42371	1	0.84	274.232
Br[C@H]1CN(CC(C)C)C(=O)NC1=O	49077	0	1.182	249.105
S(Oc1cc2C[C@H]([C@H]3[C@@H]4CC[C@H](CCOCC[NH+](CC)CC)[C@]4(CC[C@@H]3c2cc1)C)C)(=O)(=O)N	732011	1	3.337	493.722
[Tl+3]1(O[C-](c2ccccc2)[CH-][C-](O1)c1ccccc1)([C@H]1C=CC=C[CH-]1)[C@H]1C=CC=C[CH-]1	644916	1	7.332	583.854
S(=O)(=O)(N1CCN(CC1)C1=NS(=O)(=O)c2c(N1c1ccccc1)cccc2)c1ccc([N+](=O)[O-])cc1	743639	0	2.348	527.573
O=C1N[C@@H](Cc2c1cncc2)c1ccccc1	79573	0	1.574	224.258
Clc1ccc(NC(=O)c2ccccc2SC(=O)CC)cc1	327683	1	4.271	319.806
O1[C@H](CC(OCC)=CC1=O)c1ccccc1	21382	0	2.099	218.248
O1CCN(CC1)c1nc(nc(c1)C)N1CCOCC1	45815	0	1.093	264.323
S1CCn2c1nc(-c1ccccc1)c2\C=C\1/c2cc(OC)ccc2NC/1=O	711066	1	3.948	375.444
O1c2c(cc3OCOc3c2)[C@@H]([C@@H](C)[C@H]1Nc1ccc(OC)cc1)c1cc(OC)c(O)c(OC)c1	671171	1	4.952	465.495
O(C(=O)CC)c1c(C)c([nH]c1C(=O)[O-])C(OCC)=O	13434	0	0.787	268.243
S=C1Nc2c(-c3c1cccc3)cccc2	98857	0	3.674	211.282
O=C1c2c(C(=O)c3c1cccc3)c(NC(=O)c1ccccc1)ccc2NC(=O)c1ccccc1	7228	0	4.377	446.454
S(=O)(=O)(c1ccc(OC)cc1)c1ccc(F)cc1	108693	0	3.121	266.288
Oc1c2c(C(=O)C=C(N3CCN(CC3)c3ncccc3)C2=O)c(O)cc1	658142	1	2.062	351.356
Clc1cc\2c(N(C)C(=O)/C/2=C\c2n3C=C(Sc3nc2C)C)cc1	736817	1	2.929	343.831
O=[N+]([O-])c1cc2[nH]cc(c2cc1)C[NH+](C)C	67770	0	0.53	220.248
O=C(N1CCC[C@@H]1C(=O)NCc1ccccc1)[C@@H]1N(CCC1)C(=O)[C@H](N(C(=O)[C@H](NC(=O)[C@H]([NH+](C)C)C(C)C)C(C)C)C)C(C)C	669356	1	1.433	641.864
O=C(N)[N-]\N=C(/C)\[C@H]1C2CCC(C1)CC2	167975	0	1.477	208.28
ClC1=C[C@]2(C([C@H]3OC(=O)[C@@H]([C@@H]3CC2)C)=C(C)C1=O)C	125344	0	2.97	280.747
S1c2n(N=C1C)c(\C=C/1\c3cc(OC)ccc3NC\1=O)c(n2)C	736808	1	1.634	326.373
O1[C@@H]2[C@H](O[C@]3(O[C@H](CCC3)C)C3=C2C(=O)c2c(cccc2)C3=O)CC1=O	641401	1	2.15	354.353
O(C(=O)c1n(nc(NC(=O)Nc2nn(C)c(c2)C(OC)=O)c1)C)C	742393	0	1.194	336.303
[Sn+4]1(OC(=O)c2c(N1)cccc2)(O[Sn+4]1(OC(=O)c2c(N1)cccc2)([CH-]CCC)[CH-]CCC)([CH-]CCC)[CH-]CCC	628573	1	11.668	748.085
s1c2CCCc2c2c1N=C(NC2=O)C[NH+]1CCN(CC1)c1ccccc1F	744270	0	1.823	385.478
O(C)c1cc2c(cc(cc2)C[NH2+]CCOCCOCC[NH2+]Cc2cc3c(cc(OC)cc3)cc2)cc1	695801	1	1.614	490.634
FC(F)(F)c1cc(Nc2nc(ccc2C(=O)N\N=C\c2ccncc2)C(F)(F)F)ccc1	743925	1	4.784	453.341
Clc1ccc(NC(=O)c2cccc([N+](=O)[O-])c2O)cc1	22899	1	2.931	292.675
O=C(c1c2c(n(C)c1C)cccc2)c1ccccc1	106282	0	3.879	249.307
O1c2cc(O)c(cc2C=C(C(=O)Nc2ccccc2)C1=N)CCCCCC	701074	1	5.224	364.438
O[C@@H]1C[C@H]2[C@H]([C@@H]3CC[C@@H]([C@H](CCC(=O)[O-])C)[C@@]13C)CC[C@H]1C[C@@H](O)CC[C@@]12C	37552	0	2.608	391.564
BrP(NC1CCCCCC1)(c1ccccc1)(c1ccccc1)c1ccccc1	99060	1	7.556	454.382
Fc1cc2c3N(C=C(C(=O)[O-])C2=O)c2c(Oc3c1N1C[C@@H]([NH3+])CC1)cc1c3c(ccc1c2)cccc3	713079	1	1.267	481.474
O(C)c1cc2c(N=C[C@H]3N([C@@H](O)CC3)C2=O)cc1O	285223	1	0.494	262.261
O1C[C@H]2[C@@H]([C@H](c3c(cc4OCOc4c3)[C@H]2Nc2ccc(N(C)C)cc2)c2cc(OC)c(O)c(OC)c2)C1=O	644947	1	4.045	518.558
O=[N+]([O-])\C=C\c1cc2c(cc1)cccc2	111556	1	2.718	199.205
ClCc1cc(cc(CCl)c1OC)C=1Sc2c(cccc2)C(=O)C=1	609259	1	4.878	365.274
O(CC)C(=O)/C(=C/c1c2c([nH]c1)cccc2)/C#N	10091	0	2.634	240.257
FC(F)(F)C(=O)[O-]	77366	0	-0.591	113.015
O=C1NC(=O)[C@H](C#N)C(CCC)(C)[C@@H]1C#N	39835	0	0.744	219.24
O=C1N(C(=O)C=C1)c1ccc(N=Nc2ccccc2)cc1	6511	0	3.757	277.277
S(CC[C@H]([NH3+])C(=O)[O-])CC	97927	0	-2.485	163.238
Clc1cc(ccc1NC(=O)[C@@H]([NH3+])CCCC[NH3+])-c1sc2c(n1)cccc2	703784	1	1.057	390.93
S=C1N(C)C(=Nc2nc[nH]c12)N	43405	0	0.441	181.218
Clc1[nH]c2c(cccc2)c1\C=C\1/c2c(NC/1=O)cccc2	720148	1	3.483	294.735
ClCCN(CCCl)c1ccc(cc1)C[C@H](NC(=O)C)C(=O)N[C@@H](CC(C)C)C(OCC)=O	167780	1	3.738	488.448
O1C(OC(=O)CC1=O)c1ccc([N+](=O)[O-])cc1	128177	1	1.553	237.166
Clc1c2CCc3cc(Cl)c(O)c(-c4cc(\C=C/c5c(Cl)c(O)c(cc5Cl)-c2cc(Cl)c1O)cc(Cl)c4O)c3	703871	1	10.472	629.142
Clc1ncnc2n(cnc12)C(C)C	61963	0	1.571	196.637
[Pt+2](Cl)(Cl)(S(=O)(=[CH2])c1ccccc1)N1C=2C(C=CCC=2)=CC=C1	632791	1	2.564	535.345
Br[C@@H]1[C@H]2C[C@@H](C1)[C@@H](C(OC)=O)[C@H]2C(OC)=O	558	0	1.413	291.138
O=C1N2CCNC2=NC=C1	741136	0	-0.727	137.139
O1C(C)=C(C(OCC)=O)[C@@H](CC1=O)C	11003	0	1.276	198.216
O=C(N1CCCCC1)[C@H]([NH+]1CCCCC1)[C@H]([NH+]1CCCCC1)C	60614	0	-0.133	323.517
O(CC)C(=O)\C(=C\c1c2c([nH]c1-c1ccccc1)cccc2)\C(OCC)=O	749024	1	4.769	363.406
O1c2c(c(O)c(O)c(O)c2O)C(=O)C=C1c1ccc(O)cc1	76988	0	1.926	302.236
Clc1c2c(nccc2)c(N)cc1OC	1184	0	1.917	208.644
O(C)c1c(OC)cc(cc1OC)/C=C/1\C[C@H]2[C@H]3[C@H](CC[C@]2(C)\C\1=N\O)[C@@]1(C(C[C@@H](OC(=O)C)CC1)=CC3)C	704615	1	5.647	523.66
O(C(=O)C)[C@@H]1[C@@H]2CC[C@H]3[C@@H]4CC[C@H]([C@H]([NH+](C)C)C)[C@]4(CC[C@@H]3[C@]2(CC[C@@H]1NC(=O)\C=C(\C)/C)C)C	748912	1	3.936	487.738
Clc1c(Cl)c(Cl)c2[nH]nnc2c1Cl	134674	0	4.092	256.904
O=C1N=C(NC(C)=C1C)N	66052	0	0.003	139.155
O(C)c1ccc(cc1O)C=O	82996	0	1.33	152.147
Clc1cc(C)c(Nc2nc(ccc2C(=O)N\N=C\c2ccc([N+](=O)[O-])cc2)C(F)(F)F)cc1	743917	1	6.037	477.824
O(CC)c1nc(cc2c1C(=O)NC(C(OCC)=O)=C2[O-])-c1ccccc1	745969	0	1.587	353.349
Oc1c2c3c4c(c5c2c(C=CC5=O)cc1)C(=O)C=Cc4ccc3O	625763	1	3.246	314.291
O1[C@@H](CO)[C@H](O)[C@H](O)[C@H]1n1c2ncnc(N)c2nc1N(C)C	101164	0	-1.177	310.309
S=C(N(CCC#N)C1CCCCC1)Nc1cc(ccc1)C	201887	0	5.371	301.45
S1c2c(C(=O)c3cc(O)ccc13)c(NCC[NH+](C)C)ccc2C	317003	1	2.153	329.437
Clc1ccccc1C=1Oc2c(C(=O)C=1)c(O)cc(O)c2[C@H]1CC[N@@H+](C[C@H]1O)C	642740	1	1.548	402.848
Clc1ccc(cc1)[C@H]1SCC(=O)N1NC(=O)c1ccc(nc1)C	745070	0	2.292	347.819
s1c2c(nc1NC(=O)COc1cc(ccc1)\C=C\1/Cc3c(cccc3)C/1=O)cccc2	745186	0	5.052	426.487
S(=O)(=O)(Nc1cc([N+](=O)[O-])ccc1OC)c1ccc(cc1)C	99634	0	2.681	322.336
O=C(N)C1=CN=C2N(CCCCC2)C1=N	248587	0	-0.357	206.244
BrCCN(CCBr)c1ccc(cc1)\C=C(\C(=O)N)/C#N	81767	1	2.92	401.096
FC(F)(F)C=1NC(=O)N[C@@H](CN2C(=O)c3c(cccc3)C2=O)C=1C(OCC)=O	742366	0	1.169	397.305
OCn1c2c(c3c1cccc3)cccc2	108694	0	2.972	197.233
O1[C@@H](C[C@@H]2O[C@H](C[C@H](OC)C[C@@H]3O[C@H](CC1=O)C[C@@H](OC(=O)\C=C/CCc1nc(oc1)\C=C/CNC(OC)=O)C3)[C@H](CC2)C)\C=C\CC(C)C	727719	1	4.747	700.859
Clc1nc2c(ncnc2N)n1[C@@H]1O[C@@H](CO)[C@@H](O)[C@H]1O	354258	1	-1.005	301.686
S=C(Nc1ccccc1)NCCC#N	49069	0	2.491	205.279
O=C([O-])\C(=C/c1ccccc1)\c1ccccc1	16645	0	1.932	223.247
FC(F)(F)c1ccccc1NC(=O)C	88329	0	1.892	203.161
[Sn+4]123(OC(=O)CN1CCN2CC(O3)=O)([CH-]CCC)[CH-]CCC	628574	1	3.975	403.061
O=C1NC(=O)NC12c1c(-c3c2cccc3)cccc1	34504	0	1.793	250.252
O(\N=C\c1ncccc1)CCc1ccccc1	66427	0	2.878	226.274
P(OC[C@H]1O[C@H](N2C=CC(=NC2=O)N)[C@@H](O)[C@@]1(O)C#C)(OC[C@H]1O[C@H](N2C=CC(=NC2=O)NCCCCCCCCCCCCCCCCCC)[C@@H](O)[C@H]1O)(=O)[O-]	722308	1	3.029	823.89
Cl[C@@H](C#N)CS(=O)(=O)c1ccccc1	620129	1	1.887	229.683
O=C1NC(=O)N(C=C1)\C(=C/C(OCC)=O)\C(OCC)=O	678989	1	-0.168	282.249
ClC1=C(N2CCN(CC2)c2ccc(cc2)C(=O)C)C(=O)c2c(C1=O)c(O)ccc2O	660635	1	2.782	426.85
Clc1cc([N+](=O)[O-])c(S(=O)(=O)N)cc1	81213	0	1.093	236.633
O=C1N(CC=C)C(=O)[C@@H]2[C@@H]1CCCC2	19694	0	1.496	193.242
O1C(=O)C=CC1=O	9568	0	0.253	98.0569
Clc1c2c(NC(=O)[C@]2(O)CC(=O)c2cc3c(cc2)cccc3)c(Cl)cc1	635327	1	3.871	386.228
Clc1cc(Cl)cc(C[N@H+](Cc2cc(cc(C)c2O)C)C)c1O	47915	1	3.743	341.252
O=C(C)c1ccc(cc1)CCCc1ccc(cc1)C(=O)C	37520	0	4.196	280.361
N(/N=C(/C1CC1)\C1CC1)=C(\C1CC1)/C1CC1	49181	0	3.139	216.322
O(C)c1ccc(cc1)C1=NC(=O)N[C@@H]1c1ccc(OC)cc1	26692	1	2.982	296.321
O=C1N=C(Nc2nc([nH]c12)C)N	22745	0	-0.403	165.153
O([C@@H]1C[C@@H](CC[C@@H]1OC(=O)C)C(OCC)=O)[C@@H]1C[C@H](CC[C@H]1OC(=O)C)C(OCC)=O	30543	0	2.109	442.5
Clc1ccc(cc1)\C=C\1/Sc2scc([n+]2C/1=O)-c1cc([N+](=O)[O-])ccc1	657720	1	5.538	401.867
O(C)c1cc(ccc1OC)CCNC1=CC(=O)c2ncccc2C1=O	677950	1	2.142	338.357
Oc1c(O)cc(cc1O)C(=O)N[O-]	324362	0	-0.585	184.126
Oc1c2[nH+]c(cc(Nc3cc(ccc3)/C(=N/OC)/C)c2ccc1)-c1ccccc1	735323	1	5.392	384.45
[nH]1c2cc(N)ccc2c2nc3cc(N)ccc3cc12	682454	1	2.444	248.283
Brc1cc2c(ncnc2N\N=C(/[C@@H](O)[C@H](O)CO)\C=N\Nc2ncnc3c2cc(Br)cc3)cc1	716032	1	3.517	590.227
Clc1ccc(cc1)C(=O)NNC(=O)c1c2c(ccc1)cccc2	88177	0	3.444	324.761
Oc1cc(N2CCCCC2)ccc1C(=O)[O-]	23895	0	0.823	220.244
S(c1nccnc1C)c1ccccc1	57165	0	2.468	202.275
Clc1ccc(N2CC[NH+](CC2)C[C@H](O)COc2ccccc2C)cc1	91357	0	2.66	361.886
o1c(nnc1NC(=O)c1c(n(nc1C)-c1ccccc1)C)-c1occc1	744216	0	2.505	349.343
n1cnc2n(ncc2c1NCC=C)C	21095	0	1.064	189.217
Oc1ccc(cc1)C[C@@H]1NC(=O)NC1=O	31204	0	0.637	206.198
O=C1c2c(N(CC(OCC)=O)C1=O)cccc2	136016	0	0.932	233.22
n1c(cccc1C)-c1nc(ccc1)C	4705	0	2.469	184.237
Clc1cc(C(F)(F)F)c(nc1)N\N=C(\c1ccccc1)/c1ncccc1	693629	1	5.366	376.763
O1N([C@H](C=C[C@H]1[C@H](OC(=O)C)OCC)C)c1ccc([N+](=O)[O-])cc1	641383	1	2.699	336.34
S1c2c(N(c3c1cccc3)CC[C@H]1[N@@H+](CCCC1)C)cc(SC)cc2	186060	1	4.002	371.582
[Pt+2](Cl)(Cl)(N1CC=CC=C1)N1CC=CC=C1	632819	1	1.85	426.2
Br[C@H]1[C@H]2C[C@H]([C@@H](C(=O)[O-])[C@H]2C(=O)[O-])[C@H]1Br	31979	0	-1.537	339.965
S=C(N(CCC(OCC)=O)C1CCCCC1)Nc1ccccc1	49073	0	5.21	334.476
Brc1ccc(cc1)-c1[nH]c2c(cccc2)c1\C=N\Nc1ccc(cc1)-c1[nH]c2c(n1)cccc2	713210	1	7.741	506.396
Nc1cc(cc(c1)C)C	26880	0	2.055	121.18
O(C(=O)c1ccc([N+](=O)[O-])cc1)[C@@H]1C[C@@H](CC[C@@H]1C(C)C)C	29120	0	4.717	305.369
Oc1ccccc1C(=O)N[O-]	5088	0	-0.101	152.127
Br[C@@]1(CC12c1c(-c3c2cccc3)cccc1)C(=O)[O-]	116460	0	1.903	314.153
O(C(OCC)=O)c1cc(C=O)c([N+](=O)[O-])cc1	364655	0	2.243	239.182
s1c(nnc1Nc1ccccc1)CSc1n2-c3sc4CCCCc4c3C(=O)N(c2nn1)Cc1ccccc1	743481	0	6.316	557.713
Clc1cc(C(=O)[O-])c(N)c([N+](=O)[O-])c1	29083	0	-0.203	215.571
S(=O)(=O)([O-])c1cc(O)c2c(cc(Nc3ccccc3OC)cc2)c1	37183	0	1.118	344.362
O(C)c1cc2c(cc1OC)C(=O)C=C([O-])C2=O	131647	0	0.484	233.197
Clc1cc(cc(Cl)c1)C=1c2c(cc([N+](=O)[O-])cc2)C(=O)N(CCc2cc(OC)ccc2)C=1N	691203	1	5.303	484.331
O1c2c(cc3OCOc3c2)[C@@H]([C@H](C)[C@@H]1NNc1ccccc1)c1cccc(OC)c1OC	667904	1	4.883	434.484
S\1NC(SC)=N/C/1=N/N	127216	0	0.533	162.237
O[C@H]1CC[C@@H]2[C@H](C[C@@H]3[N@H+](CCc4c5c([nH]c34)cccc5)C2)[C@H]1C(=O)[O-]	95096	0	-0.438	340.416
O1[C@]23[C@@H](O[C@H]4OC=C([C@H]([C@@H]24)C=C3)C(OC)=O)\C(=C/C)\C1=O	112152	1	0.76	290.268
Brc1cc2c([n+](c1)CC(=O)c1cc(O)c(O)cc1)cccc2	36859	0	4.154	359.194
Clc1cc2nc(sc2cc1)N\N=C(/C)\c1ncccc1	703111	1	3.997	302.782
O(C)c1cc2c([nH+]ccc2Nc2cc(C[NH+](CC)CC)c(O)cc2)cc1	13465	1	2.93	353.458
S(=O)(=O)([O-])c1cc2c(ccc(S(=O)(=O)[O-])c2)c(N=O)c1O	5044	0	-3.082	331.279
O(C)c1cc(ccc1OC)CNC(=O)[C@H](N(C(=O)[C@H]1N(CCC1)C(=O)[C@@H](N(C(=O)[C@@H](NC(=O)[C@@H]([NH+](Cc1ccccc1)Cc1ccccc1)C(C)C)C(C)C)C)C(C)C)C)C	704969	1	4.456	842.097
O=C1C=C2NC(=O)/C(=C/C=C\[C@@H](OC)[C@H](OC(=O)N)/C(=C/[C@@H](C)[C@H](O)[C@H](OC)C[C@@H](CC(=C1NCC[NH+](C)C)C2=O)C)/C)/C	683659	1	0.485	617.753
S=C1Nc2c(nc(nc2N)N)N1	26498	0	0.864	182.206
O(C)c1ccc(cc1)-c1[nH]c(NNC(=O)C)c(c1)C(OC)=O	741625	0	1.839	303.313
O=C(Nc1ccccc1)C=1C(C(C(=O)Nc2ccccc2)=C(NC=1C)C)c1ccc(N(C)C)cc1	636092	1	3.892	466.574
o1c(ccc1[N+](=O)[O-])\C=N\NC(=O)C(CCCC)C(=O)N\N=C\c1oc([N+](=O)[O-])cc1	720240	1	2.712	434.36
O1c2c(OC[C@H]1C(=O)NCC=C)cccc2	36582	0	1.427	219.237
P(Oc1ccc(cc1)C)(Oc1ccc(cc1)C)(=O)Nc1ncc([N+](=O)[O-])cc1	87831	0	4.546	399.337
O=C1NC(=O)NC=C1c1ccccc1	146514	0	0.467	188.183
O=C([O-])C(C)(c1c2c(n(C)c1C)cccc2)c1c2c(n(C)c1C)cccc2	106231	0	3.222	359.441
O=C(N(CCCC)CCC#N)N	49718	0	0.677	169.224
O=C(N(CCC)CCC)CCCC	195031	0	2.904	185.306
P1(OCC([N+](=O)[O-])(CO1)C)(=O)N1C[C@H]1C	105507	0	-0.248	236.162
S1c2c(c(F)c(F)c(F)c2F)C(=O)n2c3c(nc12)cccc3	671883	1	4.651	324.253
FC(F)(F)C1=NC2(Nc3c1cc(c1c3cccc1)C(=O)C(F)(F)F)CCCCC2	711692	1	5.772	414.344
O(C)c1cc2c3c([nH]c2cc1)c(c1c(c[n+](cc1)COC(=O)c1ccccc1)c3C)C	632620	1	6.278	411.472
Oc1c2c(ccc1)C(c1c(C2=O)c(O)ccc1)C(=O)CCCCC(=O)C1c2c(C(=O)c3c1cccc3O)c(O)ccc2	641175	1	5.322	562.565
O1C[C@H]2[C@@H]([C@H](c3c(cc4OCOc4c3)[C@@H]2[NH2+]Cc2cc(OC)c(OC)c(OC)c2)c2cc(OC)c(OC)c(OC)c2)C1=O	626317	1	2.557	594.629
Clc1ccccc1\C=N\C1CCCCC1	176369	0	4.372	221.726
O=C1[C@@H](C(OCC)=O)[C@H](N(Cc2ccccc2)C1=O)C(OCC)=O	55178	0	1.345	333.336
O(C)c1cc2c(-c3c(c4c(nc3NCCC[NH+](C)C)cccc4)C2=O)cc1	734626	1	2.08	362.445
Fc1ccc(cc1)CNc1nc2c(nc1-c1ccccc1)c(N)cc(N)c2	731131	1	3.884	359.4
S=C([N-]\N=C\c1ccccc1[N+](=O)[O-])[N-]\N=C\c1ccccc1[N+](=O)[O-]	51361	1	4.578	370.343
O(C)c1cc2c(nc(cc2)CC(=N)c2ccc(N(C)C)cc2)cc1	13717	0	4.084	319.4
Clc1ccc(NC(=O)[N-]n2c3c(nc2)cccc3)cc1	741635	0	3.061	285.708
S1[C@](O)(CN(C)C1=S)[C@H](O)[C@H](O)[C@H](O)CO	151994	0	-0.41	269.338
Clc1ccc(cc1)C(Oc1ccc(cc1)C)=O	11133	0	4.412	246.689
OCc1ccn(CCCC(=O)Nc2cc(n(c2)C)C(=O)Nc2cc(n(c2)C)C(=O)Nc2cc(n(c2)C)C(=O)NCCC[NH+](C)C)c1CO	673131	1	-0.605	664.775
O[C@@H]1c2cc(N)ccc2-c2c1cccc2C(=O)[O-]	123809	0	-0.065	240.234
ClCCCN1C2=C(c3c(cc([N+](=O)[O-])cc3)C1=O)C(=O)c1c2c(OC)ccc1	733883	1	2.821	398.796
Clc1cc2c(nc(C[NH+]3CC[NH+](CC3)C)c(C(OCC)=O)c2-c2ccccc2)cc1	748519	1	1.527	425.951
S1SC(=S)NC1=N	65248	0	2.309	150.246
O1[C@H](C[C@@H](O)[C@H](OC(=O)\C(=C/C)\C)[C@H]1C)c1ccc2c(c1O)C(=O)C=1[C@H](C[C@@H]3[C@](OC)(C(=O)C(C(=O)N)=C([O-])[C@@H]3CC(=O)c3ccccc3O)C=1[O-])[C@]2(OC)C	656598	1	0.824	773.778
Clc1cc2c(OC=C(\C=N\NC(=O)c3[nH]c4cc(oc4c3)-c3ccccc3)C2=O)cc1	745537	0	4.548	431.828
OCc1n(C)c(nc1)C	195980	0	-0.343	126.156
Clc1ccc(Cl)cc1Nc1sc2c(n1)C(=O)c1c(cccc1)C2=O	658274	1	5.404	375.229
S(C([C@@H]([NH3+])C(=O)[O-])(C)C)CCc1ccncc1	163410	0	-1.56	254.349
o1c(nnc1-c1cc2c(cc1)cccc2)-c1ccc(OC)cc1	90382	0	3.946	302.327
S(=O)(=O)(NC)c1ncnc2nc[nH]c12	56460	0	-0.788	213.217
S=C(N1CCCCC1)[N-]\N=C/1\c2c(NC\1=O)cccc2	668495	1	3.257	287.36
O(C(=O)C=1[C@@H](N=C(NC=1CCCO)N)CCCCCCCCCCC)C	665602	1	4.268	367.526
Sc1nc(CC(=O)c2ccccc2)c(nn1)CC(=O)c1ccccc1	614414	0	4.199	349.406
Oc1ccc2n(c3c(c2c1C(=O)C)C(=O)c1c(cccc1)C3=O)C	720995	1	3.097	319.311
FC(F)(F)[C@H](CC(O[C@@H]1[C@@H]2[C@]34[C@@H]([C@@H](O)[C@@H](O)[C@]2(OC3)C(OC)=O)[C@@]2([C@@H](C[C@H]4OC1=O)C(C)=C(O)C(=O)C2)C)=O)C	656904	1	0.357	576.513
O1c2c(C(=O)C(C\C=C(\C)/C)=C1c1ccc(O)cc1O)c(O)c(\C=C\C(C)C)c(OC)c2	241010	1	5.872	436.497
O1[C@@H](C[NH2+]C12CCCCC2)C	128272	0	0.108	156.245
O(CC)c1cc2[C@@H]3[C@H]([C@@H]4CC[C@H](O)[C@]4(CC3)C)CC(=O)c2cc1O	679431	1	3.178	330.418
[n+]12c(cc3c(cc(cc3C)C)c1)cccc2	77811	0	3.711	208.278
s1ccnc1NC(=O)\C=C/C(=O)[O-]	80807	0	-1.283	197.191
OCC1(CC(C1)CCc1ccccc1)CNc1nc(ncc1N)N	676316	1	2.082	327.424
FC(F)(F)c1ccc(cc1)CN1c2n(nc(c2COC1)C(C)(C)C)-c1ccccc1	749060	0	6.302	415.451
Oc1c(cc(Nc2c3c([nH+]c4c2n(c2c4cccc2)C)cccc3)cc1C[NH+](CC)CC)C[NH+](CC)CC	656712	1	4.148	512.709
O1[C@H]2[C@@H]1C(=O)C=1[C@H]3[C@@H]([C@@H]4CCC(=O)[C@]4(CC3)C)CCC=1C2=O	720382	1	2.022	300.349
[P+](CCCCOC1CC(N(O)C(C1)(C)C)(C)C)(c1ccccc1)(c1ccccc1)c1ccccc1	747162	1	6.331	490.637
FC(F)(F)c1[nH+]ccc(Nc2ccc(cc2)C(=O)Nc2ccccc2O)c1	748701	0	4.555	374.336
ClC[C@H]1c2c3c(cccc3)c(N)cc2N(C1)C(=O)c1nn(C)c(NC(=O)c2nn(C)c(NC(=O)C)c2)c1	694456	1	1.671	520.971
O(C)c1ccccc1NC(Oc1cc(OC(=O)c2ccccc2)ccc1)=O	191454	0	4.585	363.363
[Pt+4](Cl)(Cl)(Cl)(Cl)(NC[Si](C)(C)C)NC[Si](C)(C)C	600301	1	4.763	541.351
Fc1cc2[n+]([O-])c(C(=O)c3cc4c(cc3)cccc4)c([n+]([O-])c2cc1F)C(F)(F)F	736435	1	4.128	420.289
P(OCC)(OCC)(=O)Nc1ncc(cc1)C	87822	0	1.336	244.227
Cl[C@H]1N(Nc2nc(cc(O)n2)C)[C@H](C1=O)c1ccc(O)cc1	653007	1	2.457	320.731
O1[C@H](C=C(C[C@@H](O)CCCCC[C@H](O)CC[C@H](O)[C@H]2O[C@@H](CC2)[C@@H](O)CCCCCCCCCCCCCC)C1=O)C	617594	1	8.327	596.878
Brc1ccc(N=Nc2cc([C@H](Sc3ccccc3)NNC(=O)CC(=O)Nc3ccccc3Cl)c(O)cc2)cc1	659610	1	7.361	624.936
O[C@@H](c1c([nH]c(-c2ccccc2)c1[C@@H](O)c1ccccc1)-c1ccccc1)c1ccccc1	627564	1	6.558	431.525
O=C(\C=C\c1ccc(cc1)\C=C\C(=O)C(C[NH+](CC)CC)(C)C)C(C[NH+](CC)CC)(C)C	602066	1	2.767	442.677
O(CC[NH+](C)C)c1cc2c3c([nH]c2cc1)c(c1c(cncc1)c3C)C	338258	1	2.615	334.435
O=C(N)c1cn[nH]c1N	1402	0	-1.346	126.117
O1[C@]2(NC3=[N+]4[C@H](CC[C@H]4C[C@]4(O[C@H](C=CCC4)CC)N3)[C@@H]2C(OCCCCCCCCCCCCCCCC(=O)[O-])=O)CCC[C@H]1C	713159	1	6.898	657.923
s1c2c(nc1Sc1n(cnc1[N+](=O)[O-])C)cccc2	631137	1	3.224	292.337
S(OC=1CN(C)C(=O)C=1NC(=O)C)(=O)(=O)c1ccc(cc1)C	118836	1	-0.09	324.352
Brc1ccc(Nc2nc(nc(N)c2)N)cc1	42135	0	2.455	280.124
Fc1ccc(cc1)\C=C/1\[C@H](CC\C(=C\c2ccc(F)cc2)\C\1=O)C	690741	1	5.8	324.364
[Fe+2]12(OS(=O)(=O)[O-])[N@@H+](N[C@@H]3N1C=CC=C3)[C-]([C@@H]1N2C=CC=C1)c1ccccc1	625540	1	-2.189	429.251
S(P1(=S)O[C@@H]([C@@]2(OCCCC2)CO1)[C@@H]1OCCCC1)[C@H](CC(OCC)=O)C(OCC)=O	30517	0	3.121	496.575
Clc1cc([N+](=O)[O-])ccc1N1[C@](O)(c2c(cccc2)C1=O)c1ccccc1	69360	0	4.355	380.781
[n+]1(c2c([nH]c3c2cccc3)c(Nc2ccc(N3CCCCC3)cc2)c2c1cccc2)C	748394	1	7.048	407.53
S(=O)(=O)(N)c1ccc(N2N=C(CCC2=O)c2ccc(O)cc2C)cc1	747556	1	1.781	359.4
Ic1cc(c2c(nccc2)c1O)C(=O)C	165810	1	2.092	313.091
O=C1NC(=O)[C@@H]2[C@H]1[C@@H]1C=C[C@H]2C1	31977	0	-0.096	163.173
O1c2c3c(c(OC)cc2-c2c(cc(cc2OC)C)C1=O)c(O)ccc3[C@H]1O[C@@H](C)[C@H](O)[C@@](O)(C)[C@@H]1O	354843	1	2.771	496.506
O(c1ncccc1[N+](=O)[O-])c1cc(NC(=O)C)ccc1	76786	0	1.793	273.244
S1c2n(C=C1C)c(\C=N\[N-]C(=[NH2+])N)c(n2)-c1ccc([N+](=O)[O-])cc1	720137	1	1.75	343.364
Cl\C(=C/C(=O)N[O-])\C(=O)N[O-]	144101	0	-2.229	178.531
O=C1N[NH+]=C(N)C1	34806	0	-1.491	100.099
O=C1N(c2ccccc2)C(=O)[C@H]2[C@@H]1[C@]1([N@@H+](C2)CN(N=C1c1ccccc1)c1ccccc1)c1ccccc1	697646	1	4.013	499.582
O1C[C@H]2[C@@H]([C@H](c3c(cc4OCOc4c3)[C@H]2Nc2cc(ccc2)CO)c2cc(OC)c(O)c(OC)c2)C1=O	628675	1	3.278	505.516
O1c2c(cc3OCOc3c2)[C@@H]([C@H](C)[C@@H]1[NH+]1CC[NH2+]CC1)c1cc(OC)c(OC)c(OC)c1	675364	1	0.505	444.521
O(C)c1cc2c(cc1OC)CC\C(=C/c1cc(OC)cc(OC)c1)\C2=O	692308	1	4.197	354.396
O(C(=O)C)[C@@H]/1[C@@]2([C@H]([C@H]3[C@H](CC2)[C@@]2(C(C[C@@H](OC(=O)C)CC2)=CC3)C)C\C\1=C/c1ccncc1)C	717880	1	4.47	463.608
S(=O)(=O)(N(O)C)NCCOc1ccc(cc1)C(C)(C)C	748385	0	1.594	302.39
S(=O)(=O)(C)c1ccc(OCC=C)cc1	87352	0	1.956	212.265
Clc1cccc(Cl)c1C=1C(=O)c2c(cccc2)C=1SC(=O)N(C)C	332837	1	4.911	378.272
S(=O)(=O)(C)c1n2c(nn1)N(C)C(=O)C(C#N)=C2c1ccccc1	744866	0	0.757	329.334
O1CC[NH+](CC1)C[C@@H]1CC\C(=C/CCCCCCCCC)\C1=O	649910	1	3.564	322.505
o1cccc1-c1nn2c(NC(=CC2=O)c2ccccc2)c1	379651	1	3.122	277.277
O1\C(\CCC1=O)=C/COC1=CC(Oc2c1cccc2)=O	735331	1	1.782	272.253
O1CC2=C(C=C3N(Cc4c3nc3cc(ccc3c4)C=O)C2=O)[C@@](O)(CC)C1=O	606172	1	1.505	376.362
O1CC(=CC1=O)[C@@H]1CC[C@@]2(O)[C@H]3[C@H](CC[C@]12C)[C@]1(O)[C@H](C[C@@H](O[C@@H]2O[C@H](C)[C@H](O)[C@H](OC)[C@@H]2O)C[C@H]1OC(=O)C)CC3	116789	1	0.929	594.69
O(C)C1=NC=2N[C@@H](C)C(=O)N(CC=2C(=O)N1C)c1ccccc1	748306	0	1.354	314.339
N12C(=NCC1)c1c(-c3c2cccc3)cccc1	141590	1	2.588	220.269
[nH]1c2c(nc1Cc1cc(ccc1)C)cccc2	15004	0	3.791	222.285
O(CC(=O)N\N=C\c1c2c([nH]c1)cccc2)c1ccccc1CC=C	717532	1	3.82	333.384
O1[C@@H](CNC1=O)COc1cc(cc(c1)C)C	170959	0	2.468	221.252
O=C1C[C@@]2(O)[C@@]([C@@H]3[C@H]([C@@H]4CC[C@H](C(=O)C)[C@]4(C[C@H]3O)C)C[C@H]2C)(CC1)C	17258	0	1.892	362.503
O(C(=O)NCC)C1=CC=CNC1=O	276369	0	-0.508	182.177
o1c/2c(nc1C(C)(C)C)C(=O)c1c(cccc1)\C\2=N\c1ccccc1	626029	1	5.069	330.38
n1c(N)c2nccnc2nc1N(C)C	24516	0	0.186	190.205
Clc1cc(Cl)cc(Cl)c1OC(=O)c1ccccc1Nc1cc([nH+]cc1)C(F)(F)F	731824	1	7.437	462.657
O=C1NC=Nc2n(cnc12)[C@@H](C[C@@H](CO)C=O)C=O	239733	0	-1.52	264.237
S(F)(=O)(=O)c1cc(ccc1)CCCCc1cc(N2C([NH+]=C([NH+]=C2N)N)(C)C)ccc1	126228	1	3.717	433.543
O1CC[NH+](CC1)[C@@H]1c2c(nc3c(c2)cccc3)-c2c(cccc2)C1(C)C	19838	0	2.86	345.457
[Pt+4]1(Cl)(Cl)(Cl)(Cl)NC[Si]2(CCCCC2)CN1	645356	1	4.023	493.191
Clc1ccccc1NS(=O)(=O)c1cc(NC(=O)CCn2ccnc2)c(O)cc1	744188	0	1.717	420.87
O1O[C@@H](C=C[C@@]1(OC)CCCCCCCCCCCCC\C=C\C=C\C)CC(OC)=O	647638	1	7.237	436.625
O=C(NCc1ccccc1)c1ccccc1C(=O)NCc1ccccc1	25019	0	3.413	344.406
BrC[C@](Br)(CC[C@H](Br)C(Cl)(C)C)C=C	659552	1	5.031	411.399
Brc1c2c(n(c1)[C@H]1O[C@H](CO)[C@H](O)[C@@H]1O)C(=O)NN=C2N	634036	1	-1.21	361.149
O(CC)C1=C2CC[C@@H]3[C@H]4CCC(=O)[C@@]4(CC[C@H]3[C@@]2(CCC1=O)C)C	746244	0	3.61	330.461
Clc1cc(NC(Oc2ccc(NC(=S)NCC=C)cc2)=O)ccc1Cl	204262	0	5.798	396.291
n12c(nc3cc(C)c(cc13)C)C(=C1C(C=CC=C1)=C2C)C	663329	1	4.985	274.36
FC(F)(F)c1cc(cc(c1)C(F)(F)F)C#N	88316	0	3.593	239.117
Clc1ccc(cc1)C(=O)N[C@H]1C2=CC(=O)C(SC)=CC=C2c2c(cc(OC)c(OC)c2OC)CC1	648770	1	4.93	512.017
O(CCCC)C(=O)N1CCCC1	30496	0	2.012	171.237
Clc1nc(Cl)nc2n(cnc12)Cc1ccc(cc1)CCl	733894	1	3.884	327.596
O=C1CC[C@@]2([C@@H]3[C@H]([C@@H]4CC[C@H](C(=O)C)[C@]4(C[C@H]3OC(=O)C)C)CCC2=C1)C	63534	0	3.07	372.498
[n+]1(c2c(cccc2)c(N)cc1C)CCCCCCCCCCCC	66214	1	7.011	327.527
O1c2c(OC1)cc1NC(=CC(=O)c1c2)c1cc(O)ccc1	656157	1	2.487	281.263
O1C[C@H]2[C@@H]([C@@H](c3c(cc4OCOc4c3)[C@H]2OC(=O)c2cc(N)ccc2)c2cc(OC)c(O)c(OC)c2)C1=O	642276	1	3.182	519.499
O(C(=O)c1cccnc1)CC(O)COC(=O)c1cccnc1	126226	0	0.377	302.282
O1CCCCOc2c3nonc3c([N+](=O)[O-])cc12	664701	1	1.722	251.196
S(OC[C@@H]1NC(=O)[C@@H](NC1=O)COS(=O)(=O)C)(=O)(=O)C	268249	0	-2.722	330.335
O(Cc1ccccc1)CCOCc1ccccc1	8915	0	3.086	242.313
P(OC[C@H]1O[C@H](N2C=C(C)C(=O)NC2=O)C[C@H]1N=[N+]=[N-])(=O)([O-])[O-]	742230	0	-2.185	345.205
Clc1c2c(nccc2)c2OC[N@@H+](Cc2c1)Cc1ccccc1F	297366	1	2.767	329.776
O(CCCCC[NH+]1CCN(CC1)c1ncnc2c1cccc2)c1cc2N=C[C@H]3N(CCC3)C(=O)c2cc1OC	743135	1	2.721	529.653
P(CC1(COC1)CP1c2c(-c3c1cccc3)cccc2)(Cc1cc(ccc1)C)Cc1cc(ccc1)C	689714	1	8.418	508.57
O(C)c1cc(NC=2c3c(-n4c([n+](c5c4cccc5)C)C=2C#N)cccc3)ccc1OC	694263	1	5.553	409.46
Oc1c2[n+]([O-])cccc2ccc1	21656	0	0.93	161.157
O1[C@@H](CC=CC1=O)C[C@H](O)CC(=O)\C=C\c1ccccc1	666388	1	2.252	286.322
O1[C@H]2[C@H]([C@@H](OC(=O)\C=C(\C)/C)[C@]3([C@@H](C=CC3=O)[C@H](C)[C@H]2O)C)C(=C)C1=O	176507	1	2.466	360.401
Clc1c(CP(OCC)(OCC)=O)c(Cl)c(Cl)c(CP(OCC)(OCC)=O)c1Cl	107960	0	4.38	516.118
O=C1C[C@@H](C(OCC)=O)[C@@H](c2c1cccc2)c1ccccc1	55137	0	3.394	294.344
[N+](C)(C)=C1C=C\C(\C=C1)=C(/c1ccc(N(C)C)cc1)\c1ccccc1	5550	1	4.761	329.458
O1C[C@H]2[C@@H]([C@@H](c3c(cc4OCOc4c3)[C@H]2Nc2ccc(NC(=O)c3n(cc([N+](=O)[O-])c3)C)cc2)c2cc(OC)c(O)c(OC)c2)C1=O	683414	1	4.152	642.612
s1c2c(Nc3n(nnc3-c3ccccc3)C2=O)c2c1cccc2	742122	0	4.405	318.353
s1c(ccc1-c1c2cc(OC)ccc2[nH]c1)-c1c2cc(OC)ccc2[nH]c1	740108	1	5.665	374.456
O(C(OC)Cc1ccccc1)C	5174	0	1.765	166.217
n1cc(ncc1-c1c2c(n(c1)C)cccc2)-c1c2c(n(c1)C)cccc2	702756	1	4.421	338.405
O1[C@@]2(c3cc(O)c4c(c3O[C@@]1(C)[C@@H](O)[C@@H]([NH+](C)C)[C@@H]2O)C(=O)c1c(C4=O)c(O)c2c(c1)c(C(OC)=O)c(cc2)C)C	82892	1	0.956	564.56
O=C1N=CN=C2NC(=NC=C12)N(C)C	51144	0	-0.741	191.19
O1CC[NH+](CC1)C[C@@H]1CCC[C@@H](C[NH+]2CCOCC2)C1=O	38535	1	-2.332	298.421
O=C(Nc1nc[nH]n1)NCCCC	135700	0	0.555	183.211
[N+]=1(c2c(cccc2)C(C)(C)C=1\C=C\C=C\1/N(c2c(cccc2)C/1(C)C)C)C	31780	1	5.711	357.511
Oc1c2N[C@H](OC)[C@H]3N(C=C(C3)\C=C\C(=O)N)C(=O)c2ccc1C	106408	1	0.718	329.35
Clc1ccccc1NC(=O)[C@H](N=Nc1ccc(Cl)cc1[N+](=O)[O-])C(=O)C	17264	0	4.413	395.197
[Se]([Se]CC[NH3+])CC[NH3+]	308820	1	-1.997	248.087
[Sn]1(OC(=O)c2c(O1)cc(cc2)C)(CCCC)CCCC	628560	1	5.466	383.07
N(/N=C(\C)/c1ccccc1)=C(/C)\c1ccccc1	25772	0	3.456	236.312
O1c2c(OC1)cc1c(c2)C(=O)C2=C1N(CCC[NH+]1CCC([NH3+])CC1)C(=O)c1cc(OC)c(OC)cc12	728090	1	-1.271	493.552
[N+]1(C[C@H](CCC1)C)(CCCCCCCCCCCC)CCCCCCCCCCCC	194124	1	10.158	436.82
O=C1NC(CC(O)(C)C)=C(C(OCC)=O)[C@H](N1)c1ccccc1	741254	0	1.17	318.368
O(C)c1c(OC)cc(cc1OC)C(=O)N1CCN(CC1)C(=O)c1cc(OCCCN2C(=O)c3c4c(cccc4ccc3)C2=O)c(OC)cc1	746031	0	3.694	667.704
Clc1cc(-n2ncc(C#N)c2-n2cccc2)ccc1	326644	0	3.6	268.701
O1c2c3c([C@@H]4[C@@H]([N@@H+](C)[C@H]3OCc3ccccc3)c3c(C=C4)cc4OCOc4c3)ccc2OC1	645318	1	3.207	442.483
Clc1cc(N2CC[NH+](CC2)C(C(=O)N)(C)C)ccc1	88446	0	0.703	282.789
s1c(nnc1\C=C/c1cc(OC)c(O)cc1)\C=C/c1cc(OC)c(O)cc1	703321	1	4.031	382.433
O(C)c1cc(ccc1OC)C[NH3+]	271740	0	-0.102	168.213
S(=O)(=O)(N)c1ccc(-n2ncc3-c4n(C=Nc23)c(nn4)Nc2ccccc2)cc1	742626	0	2.399	406.421
ClCC1(OCCO1)CCCCc1ccc(NCCCC=2C(=O)N=C(NC=2C)N)cc1	87973	0	3.452	434.96
O=C(N1C2=C(CCCCCC2)CCC1)C	242991	0	2.591	207.312
O1[C@H]([C@@H](O)[C@@H](O)CO)C([O-])=C(O)C1=O	7238	0	-2.923	205.142
O(C)c1ccc(cc1)C=1CC[C@@H](C(=O)[O-])[C@@H](C)C=1CC	19962	0	2.619	273.347
o1c(nnc1-c1cc2c(cc1)cccc2)-c1cc(OC)ccc1	90380	0	3.946	302.327
S(OCC[C@@H]1OC(N(C1)C(OCc1ccccc1)=O)(C)C)(=O)(=O)c1ccc(cc1)C	687533	1	3.191	433.518
O(C)c1cc2nnc3c4cccnc4[nH]c3c2cc1	749296	1	2.502	250.255
S(=O)(=O)([O-])c1cc2cc(O)ccc2cc1	1704	0	-0.416	223.225
Oc1c2cc(ccc2ccc1C)C#N	128068	0	2.861	183.206
O1[C@H](CO)[C@@H](O)[C@@H](O)[C@@H]1N1C=CC(=NC1=O)N	63878	1	-2.396	243.217
O(C)c1ccc(cc1O)\C=C\c1cc(OC)cc(OC)c1	381864	1	3.525	286.322
S=C1N=C2c3c(Nc4c2cc(OC)cc4)c([N+](=O)[O-])ccc3N1CC[NH+](C)C	699725	1	2.922	398.459
O(C)c1cc(ccc1OC)C[C@H]1[N@@H+](CCc2cc(OC)c(OC)cc12)CCC	127488	0	3.157	386.504
O([C@@H](c1ccccc1)c1nccc2c1cccc2)C(=O)c1ccccc1	25452	0	4.96	339.387
[NH+]1(CCCCC1)CC(c1ccccc1)c1ccccc1	45070	0	2.932	266.401
n1ccn(c1)C12CC3CC(C1)CC(C2)C3	283155	0	2.066	202.295
[NH+]=1CC(CNC=1c1ccccc1)(C)C	85341	0	1.927	189.277
O(c1c2c(nc3c1cccc3)cccc2)c1ccccc1	337974	1	4.913	271.313
O(CC)C(=O)/C(=C(\CCc1ccccc1)/C)/C#N	408233	0	3.699	243.301
O1CCOCCOCCOc2c(OCCOCC1)cc(cc2)Cc1c2c(cccc2)c(c2c1cccc2)C#N	642784	1	4.762	527.608
Fc1ccccc1-c1nc2c(cc1C)cccc2	109779	0	4.654	237.272
O1c2c3c4c(c(O)c2C)c(O)c(NC(=O)/C(=C/C=C/[C@H](C)[C@H](O)[C@@H](C)[C@@H](O)[C@@H](C)[C@H](OC(=O)C)[C@H](C)[C@@H](OC)\C=C\O[C@]1(C)C3=O)/C)c(\C=N/N1[C@@H](C[NH+](C[C@H]1C)Cc1ccc(cc1)C#N)C)c4O	184736	1	3.919	953.107
BrC=1C(=O)N=C(NC=1[O-])N	47790	0	-0.769	204.99
O=C(c1cc([N+](=O)[O-])c(C)c([N+](=O)[O-])c1)c1cc([N+](=O)[O-])cc([N+](=O)[O-])c1	86521	0	3.298	376.235
Oc1c2c(ccc1)C(c1c(C2=O)c(O)ccc1)C(=O)CCCC(=O)C1c2c(C(=O)c3c1cccc3O)c(O)ccc2	641174	1	4.865	548.539
S=C(NC1CCCCC1)[N-]NC(=O)c1ccncc1	80982	0	2.619	277.365
S(=O)(=O)(N(OCCCON(S(=O)(=O)c1c(cc(cc1C)C)C)CCC[NH3+])CCC[NH3+])c1c(cc(cc1C)C)C	707020	1	0.841	586.807
Cl/C(/C(/[N+](=O)[O-])=C(\n1nnc2c1cccc2)/Nc1ccc(OCC)cc1)=C(\Cl)/Nc1ccc(OCC)cc1	698379	1	6.826	555.413
O1C[C@H]2N([C@@H](c3[nH]c4c(c3[C@@H]2Nc2ccc([N+](=O)[O-])cc2)cccc4)c2cc(OC)c(O)c(OC)c2)C1=O	668380	1	4.603	516.502
O1[C@H](CO)[C@@H](O)[C@H](O)[C@@H]1N1C=CC(=NC1=O)N	143922	0	-2.396	243.217
S1C=Cn2c1nc(-c1ccc(F)cc1)c2\C=C\C(=O)c1cc(F)cc(F)c1	749331	0	5.165	384.374
Brc1ccc(cc1)\C=C(\C(OCC)=O)/C(OCC)=O	637153	1	3.414	327.171
O(CC)c1ccccc1NC(=O)C	7649	0	1.282	179.216
O(C)c1c2c3c(c4c5c(C(=O)C(O)=C4\C=C\C)c(OC)cc(OC)c5c3c(OC)c1)C(\C=C\C)=C(O)C2=O	693562	1	4.418	514.523
S1C=C(NC1=S)CC(C)C	40024	0	2.635	173.299
ClC=1NC(=S)n2cc(Cl)nc2C=1	131919	1	2.781	220.079
O1CCOC1(C)c1nc2c(cc1C#N)cccc2	127742	0	1.954	240.257
S(\C(=N/n1cc(C(OC)=O)c(C(OC)=O)c1-c1ccc(cc1)C)\c1ccc(cc1)C)\C(=C/C(OC)=O)\C(OC)=O	710336	1	5.863	564.606
S=C1NC(=O)C(C(C)C)(CCC=C)C(=O)N1	120860	0	2.417	240.322
S(Cc1occc1)c1nc(N)c2[nH]cnc2n1	26808	0	1.383	247.276
S1C=Cn2c1nc(-c1ccccc1)c2\C=C\1/c2cc(OC)ccc2NC/1=O	728903	1	3.561	373.428
FC(F)(F)C(O)(C(F)(F)F)[C@@H]1CC[C@@H](C(O)(C(F)(F)F)C(F)(F)F)C1=O	664181	1	3.401	416.16
[Sb+3]12(Br)(S[C@@-](S1)N1CCCCC1)S[C@@-](S2)N1CCCCC1	625504	1	3.631	526.256
O=C([C@H](NC(=O)c1ccccc1)c1ccccc1)c1ccccc1	57620	0	4.012	315.365
o1cccc1\C=C\C(=O)[O-]	4671	0	-0.152	137.113
O=[N+]([O-])c1c2c([nH+]c3c(cccc3)c2NCCC[NH+](C(C)C)C(C)C)ccc1	670701	1	3.424	382.499
Clc1ccc(cc1)-c1c(C#N)c(nc(Sc2ccccc2N)c1C#N)N	701015	1	4.323	377.85
o1cccc1\C=C\c1occc1	11894	0	2.606	160.169
n1n(cc(C#N)c1N)C(C)C	123797	0	0.877	150.181
O(CCCOc1cc2N=C[C@H]3N(CC(C3)=C)C(=O)c2cc1OC)c1cc2N=C[C@H]3N(CC(C3)=C)C(=O)c2cc1OC	694501	1	2.898	556.609
O=C([O-])[C@@H]1C[C@@H]2[C@@H]3C[C@H]([C@@H]2C1)C[C@@H]3C(=O)[O-]	81249	0	-1.578	222.237
O(CC[NH+](C)C)c1ccc(cc1)-c1n2c(C=CC=C2)c(C)c1-c1ccccc1	686324	1	4.038	371.495
[Nb-2]1234(Cl)(Cl)C5=C1C2=C3C45[Si](C)(C)C	645758	1	1.965	297.055
ClCCCCN(P(OCc1n(c2c(c1)C(=O)C(OC)=CC2=O)C)(OC[C@@H]1O[C@@H](N2C=C(F)C(=O)NC2=O)C[C@@H]1O)=O)C	721387	1	0.153	632.96
s1ccnc1N1C(=O)c2c(cccc2)C1=O	59367	0	1.436	230.243
Clc1cc2N(c3c(Sc2cc1)cccc3)CCC[NH+](C)C	17479	0	3.179	319.872
O1c2c(C(=O)C=C1c1ccccc1)c(O)cc(OCCCCC[NH+](CC)CC)c2	736041	1	3.252	396.499
O1CC2=C(C=C3N(Cc4c3nc3c(c4)cccc3)C2=O)[C@@](OC(=O)[C@@H]([NH3+])CCCC[NH3+])(CC)C1=O	610457	1	-0.441	478.54
Clc1cc(SCc2ccccc2)c(S(=O)(=O)Nc2ncn(S(=O)(=O)c3ccc(cc3)C)n2)cc1C	745958	0	5.718	549.085
O1[C@H]2N(CCCC2)C(c2ccccc2)=C1OCC	677925	1	3.217	245.317
Clc1ccc(cc1)C(=O)n1cc(c2c1cccc2)\C=C/1\C(=O)NC(=O)NC\1=O	748581	0	3.476	393.78
O1[C@H](COCc2ccccc2)[C@H]([NH3+])[C@H](OCc2ccccc2)[C@H](OCc2ccccc2)[C@H]1OC	65765	0	2.576	464.573
O1c2c(cccc2)C(NC(=O)c2ccc([N+](=O)[O-])cc2)c2c1cccc2	31167	0	3.858	346.336
O=C(C)C1(CC[NH2+]CC1)c1ccccc1	613291	0	0.204	204.288
O=C1N[C@H](C(C)C)C([O-])=C1/C(=N/[N-]C(=O)N)/C	100429	0	-1.266	238.243
S1c2c(NC1=S)c(ccc2)-c1ccccc1	503	0	4.788	243.347
Oc1c2c(cc(c1)CO)Cc1c(C2=O)c(O)ccc1	658578	1	2.29	256.253
O=C1CC[C@H]2[C@H]3[C@H](CC[C@]12C)[C@@]1([C@H](C[C@@H](O)CC1)CC3)C	93996	0	3.588	290.44
O=C(N[O-])c1cccnc1	13997	0	-1.009	137.116
Oc1c2c(C(=O)c3c(cccc3)C2=O)c(O)c2[nH]cc(c12)C[NH+]1CC[NH2+]CC1	726440	1	-0.679	379.409
O=C1NN=C(C=C1)C(=O)[O-]	203175	0	-1.925	139.089
Oc1cc(O)cc(O)c1C(=O)c1cc(O)c(O)cc1	83240	0	2.024	262.215
O=C1[C@@H]2[C@]3([C@](O)(N(Cc4ccccc4)C(c4ccccc4)=C3C(OCC)=O)C=C1)C(=O)N(c1ccccc1)C2=O	721466	1	3.868	534.559
Ic1c2c(nccc2)c(O)cc1	53183	1	2.352	271.055
s1c2N=C(N(\N=C\3/SC=C(N/3Cc3ccccc3)c3ccccc3)C(=O)c2c(C)c1C(=O)N)C	746754	1	3.991	487.597
O(c1cc(OC)c(OC)cc1C[C@@H]1[N@@H+](CCc2cc(OC)c(OC)cc12)C)c1cc2c(-c3c4[C@@H]([N@@H+](CCc4cc(OC)c3OC)C)C2)cc1OC	68075	1	4.005	698.844
O1C[C@H]2[C@@H]([C@@H](c3c(cc4OCOc4c3)[C@@H]2O[C@H]2O[C@@H]3[C@H](O[C@@H](OC3)C(C)C)[C@H](O)[C@@H]2O)c2cc(OC)c(OC)c(OC)c2)C1=O	683583	1	2.262	630.636
O=C1c2c(-c3c1cc([N+](=O)[O-])cc3)cccc2C(=O)[O-]	123810	0	0.972	268.201
S=C1NC(=C(C#N)C(=N1)N1CCOCC1)c1occc1	744450	1	1.218	288.325
O1[C@H](CCC\C=C\[C@H]2[C@@H](C=CC2)[C@H](O)\C=C\C1=O)C	746707	0	2.945	262.344
Clc1cc\2c(NC(=O)/C/2=C/2\Nc3c(cccc3)C\2=O)cc1	717815	1	2.54	296.708
o1n[n+](c(C(=O)\C=C\c2cc(OC)c(O)cc2)c1[O-])-c1ccccc1	684701	1	3.338	338.314
Clc1cc2[nH+]cc(Sc3c[nH+]c4c(ccc(Cl)c4)c3N[C@H](CCC[NH+](CC)CC)C)c(N[C@H](CCC[NH+](CC)CC)C)c2cc1	637818	1	6.682	673.825
Sc1ncnc2[nH]c(nc12)CNC(=O)C=1C(=O)[C@]2(O)[C@@H](C[C@H]3C(=C2[O-])C(=O)c2c(cccc2O)[C@]3(O)C)[C@H]([NH+](C)C)C=1[O-]	67588	1	-3.044	607.614
O1[C@@H](\C=C\C(=C\[C@@H](C\C=C\C(=C\[C@@H](C(=O)[C@@H]([C@H](O)[C@@H](C\C(=C\C(=O)[O-])\C)C)C)CO)\C)C)\CC)[C@H](C=CC1=O)C	364373	1	4.943	555.722
S(C[C@H](NC(=O)c1cccc(O)c1C)[C@H](O)C[N@@H+]1C[C@@H]2[C@H](C[C@H]1C(=O)NC(C)(C)C)CCCC2)c1ccccc1	722664	1	3.724	568.79
Clc1cc2[nH+]c3c(cc(OC)cc3)c(NCCC[NH+]3CC[NH+](CC3)CCCNc3c4c5n(nnc5cc3)-c3c(cccc3)C4=O)c2cc1	695945	1	3.603	664.219
Clc1c2c(N3CCC(=O)[C@@]3(C(OCC)=O)[C@H](N(Cc3ccccc3)C2=O)C(OCC)=O)cc(Cl)c1	742998	0	4.212	519.374
S(CC)C(=O)\C=C\1/CN(C(OC(C)(C)C)=O)[C@H]/1C(OC(C)(C)C)=O	668366	1	2.936	357.465
n1c2c(c3c(cccc3N)c1C)cccc2	13237	0	2.46	208.258
S(=O)(=O)(C)c1ccc(cc1)C=1N(C(=O)C)C(=O)N(C=1)c1cc(OC)c(OC)c(OC)c1	741936	0	1.588	446.474
S(=O)(=O)(N1CCC(CC1)(C(OCC)=O)C(OCC)=O)c1ccccc1	85020	0	1.758	369.433
S1c2c(nc(nc2NNC(=O)C)C)N(CCC)C1=S	746966	0	2.893	297.4
Clc1ccc(N2CCN(CC2)C(=S)c2cc3OCOc3cc2)cc1	83493	0	4.729	360.858
O1c2cc(ccc2OC1)\C=N\NC(=O)C1CC1	72882	0	1.545	232.235
O1[C@H](OC(C)C)[C@H](O[C@H](OC(C)C)[C@H]1OC(C)C)OC(C)C	22383	0	2.918	320.422
Brc1cc(cc(OC)c1OC)\C=C\[N+](=O)[O-]	365712	1	2.525	288.095
[N+](Cc1ccccc1)(CCCCCCCCCCCCCCCC)(C)C	32942	1	7.351	360.639
O=C1N(C(=O)C=C1)c1cc([N+](=O)[O-])c(C)c([N+](=O)[O-])c1	65908	0	1.663	277.19
Clc1cc2N(c3c(Sc2cc1)cccc3)CCC[NH+]1[C@H]2CC(O)C[C@@H]1CC2	59349	1	3.13	401.973
S(C(OCC)=O)c1ncnc2nc[nH]c12	69608	1	1.619	224.24
Clc1cc(C)c(N2C(=O)C=3N4C(SC=3C2=O)=Nc2scc(c2C4=O)-c2ccc(F)cc2)cc1	743259	0	5.187	495.933
Oc1c(O)c(c2c(cc(C)c(-c3c(cc4c(c(\C=N\CCC)c(O)c(O)c4C(C)C)c3O)C)c2O)c1C(C)C)\C=N\CCC	651923	1	8.858	600.744
O=C1c2cc(N)ccc2-c2c1cc([N+](=O)[O-])cc2	90677	0	2.07	240.214
S(C)c1cc(NP2(OCC([N+](=O)[O-])(CO2)C)=O)ccc1	120170	0	1.468	318.286
O(C(=O)C=1C2c3c(C(c4c2cccc4)C=1C(OC)=O)cccc3)C	25357	0	3.267	320.339
O=C(NCC[NH+](C)C)c1c2nc3c(nc2ccc1)cccc3C	617972	1	1.331	309.386
Sc1nc(N)c2c(oc(c2-c2ccccc2)-c2ccccc2)n1	745873	0	4.555	319.38
O(C)c1cc2c3c([nH]c2cc1)c(c1c(c3)c(ncc1)COC(=O)NC)C	631393	1	3.536	349.383
s1c(nnc1NC(=O)c1c(F)cccc1F)C(F)(F)F	319424	0	2.848	309.215
O=C1N([C@@H](CC[C@@H](N2C(=O)c3c(cccc3)C2=O)C(OC)=O)C(OC)=O)C(=O)c2c1cccc2	117588	0	1.87	464.424
FC(F)(F)c1[nH+]ccc(NCc2ccc(cc2)C(=O)Nc2cc(ccc2O)C)c1	748715	1	4.883	402.39
O=C1CCC[C@@H]1C[N+](C)(C)C	621889	1	-0.447	156.245
ClCC(=O)Nc1cc(ccc1)C(OCC)=O	708443	1	1.687	241.671
O=C1NC(=O)N=C2N(c3cc(C)c(cc3N=C12)C)CCOC(=O)CCC(=O)[O-]	3066	0	0.027	385.351
Clc1nc2SC=Cn2c1\C=N\N1CCNC1=O	741788	0	0.813	269.711
s1c2c(nc1S\C(=C/C=C(/C#N)\C#N)\c1ccc(cc1)C)cccc2	727947	1	5.418	359.467
Clc1ccc(OC[C@@H](O)C[NH+]2CCCCC2)cc1	89433	0	1.462	270.775
S=C1NC[C@@H](C)C(=O)N1c1ccc(OCCCC)cc1	121907	0	3.738	292.397
Clc1ccc(cc1[N+](=O)[O-])-c1nc2Sc3c(-n2c1\C=N\[N-]C(=[NH2+])N)cccc3	732182	1	3.897	413.841
O(Cc1nc2c(cc1)cccc2)C	72103	0	2.035	173.211
O(CC[NH+](CC)CC)c1ccc(cc1OC)\C=C\1/C[C@H]2[C@H]3[C@H](CC[C@]2(C)C/1=O)[C@@]1(C(C[C@@H](OC(=O)C)CC1)=CC3)C	727087	1	4.871	564.775
Clc1ccc(cc1)C(=O)n1cc(c2cc(OC)ccc12)[C@]1(O)C[C@H](OC1=O)CSC#N	749549	0	4.082	456.899
Clc1cc2N3C(Sc2cc1Cl)=NC(Oc1ccccc1C)=C(C#N)C3=N	748764	0	5.933	401.269
Brc1ccc(NC(=O)c2cc(Cl)c(Cl)cc2)cc1	6891	1	4.691	345.019
O(CC)c1ccc(-n2c3NC(=NC(=O)c3nc2)N)cc1	212435	0	1.174	271.275
Clc1ccccc1\C=C\C(=O)c1ccc(O)cc1	13151	1	4.124	258.7
O1C\C(=C/c2cc([N+](=O)[O-])ccc2)\C(=O)c2c1cccc2	646498	1	3.293	281.263
S(Cc1ccc(NC)cc1)c1ccccc1	89350	0	3.764	229.341
O=C(Nc1cc2c3c(n(c2cc1)CC)cccc3)c1ccccc1-c1ccccc1C(=O)[O-]	132232	0	4.336	433.478
Clc1c2c(nc(cc2)-c2ccccc2)c(cc1)C(=O)NCC[NH+](C)C	617935	1	2.413	354.853
S1c2c(N=C(C[C@H]1c1ccccc1F)C(c1ccccc1)c1ccccc1)cccc2	631531	1	7.22	423.544
O(C)C1=CC=C2c3c(cc(OC(OCC)=O)c(OC)c3OC)CC[C@H](NC(=O)C)C2=CC1=O	612115	1	2.82	457.473
S(OCCCCOS(=O)(=O)C)(=O)(=O)C	750	0	-0.289	246.302
O1C=C(C=CC1=O)[C@H]1C[C@H]2O[C@]23[C@H]2[C@H](CC[C@]13C)[C@@]1([C@H](C[C@@H](OC(=O)C(C)=C)CC1)CC2)C	267712	1	4.636	452.582
ClC=1N=C2N(C=C(C=C2)C)C(=O)C=1	104969	0	1.223	194.618
O(C(C)C)c1cc2c3c([nH]c2cc1)c(c1c(c[n+](cc1)C)c3C)C	650265	1	5.518	319.42
O=C([O-])C[n+]1ccccc1	32867	0	-0.558	137.136
O1CC[C@@H](NC(=O)c2ccccc2)C1=O	45802	0	0.761	205.21
O=C(N)[N-]\N=C/1\[C@@H]2[C@@H]3[C@H]([C@H](C\1)C2)CC=C3	102288	0	0.667	204.248
S(=O)(=O)([O-])c1cc2c(cc1)c(N)c(OCC)cc2	7570	0	-0.588	266.293
O(C)c1ccc(N\N=C(/CC[NH+](C)C)\c2ccccc2)cc1	629918	1	2.106	298.403
[Cu+2]12(Cl)[SH]=C(N(C)C)[N-][N@H+]1[C-]1c3c(N[C@-]1O2)cccc3	654377	1	1.465	348.311
O1c2c(cccc2)C(=O)C(C(=O)c2ccc(OC)cc2)=C1C	748010	0	3.249	294.301
O=C1C2=C(N(CCCCCCCCCC[NH3+])C(=O)c3c2cccc3)c2c1cccc2	740522	1	3.761	403.537
O(CCC)C[C@H](O)c1ccccc1	57404	0	1.995	180.244
O=C1NNC=2NC(=O)C=C(C1=2)C	84237	0	-0.773	165.149
o1cccc1C=1N=C(N(C)C(=O)C=1C#N)N1CC[NH+](CC1)Cc1ccccc1	744857	0	0.623	376.432
S(=O)([O-])(=Nc1noc(c1)C)c1ccc(Nc2c3c([nH+]c4c2cccc4)c(ccc3)C(=O)NCC[NH+](C)C)cc1	630702	1	2.694	545.633
[N+](C)(C)=C1C=CC(C=C1)=C(c1ccc(N(C)C)cc1)c1ccc(N(C)C)cc1	271967	1	4.923	372.526
[Pt+2]1(OS([O-])([O-])#CCC[NH+]2CC[NH+](CC2)CCO)(OS([O-])([O-])#CCC[NH+]2CC[NH+](CC2)CCO)N[C@H]2[C@H](N1)CCCC2	615590	1	-7.038	813.929
[Si](CCc1c2c(nc3c1cc(N)cc3)C=1N(C2)C(=O)C2=C(C=1)[C@@](O)(CC)C(OC2)=O)(C)(C)C	712201	1	3.137	463.601
O=C1[C@@H](O)C[C@@H]2C(=CC[C@@H]3[C@@]2(C)C(=O)C[C@]2(C)[C@@H]([C@@](O)(C(=O)\C=C\C(O)(C)C)C)[C@H](O)C[C@]23C)C1(C)C	308606	1	1.933	516.666
s1c2N=C3N(C=CC=C3)C(=O)c2cc1C(=O)Nc1cc(F)ccc1F	744228	0	2.611	357.334
O(C1=C2CC[C@@H]3[C@H]4CCC(=O)[C@@]4(CC[C@H]3[C@@]2(CCC1=O)C)C)c1ccccc1	746243	0	4.838	378.504
O(C)c1ccc(OC)cc1\C=C\[N+](=O)[O-]	610188	1	1.777	209.199
s1cccc1C=1N(S(=O)(=O)c2ccccc2)C(=O)C(C#N)=C(C=1)c1ccc(OC)cc1	746917	0	4.036	448.514
S(=O)(=O)(NN(C)c1ccccc1)c1ccc([N+](=O)[O-])cc1	132127	0	2.44	307.325
O=[N+]([O-])c1cc2[n+]([O-])nc([n+]([O-])c2cc1)NCC[NH+](CC)CC	628917	1	-0.84	323.328
BrCCN(P(OCc1n(c2c(c1)C(=O)C(OC)=CC2=O)C)(=O)N)CCBr	721513	1	1.214	513.118
O=C1c2c(nc3c(cccc3)c2\C=C\N(C)C)C(=O)c2c1nccc2	680733	1	2.709	329.352
Clc1cc(SCc2ccccc2)c(S(=O)(=O)NC(Nc2ccccc2O)=N)cc1C(=O)Nc1ccc(F)cc1	734059	1	5.69	585.069
Sc1ccc(O)cc1	46192	0	1.947	126.176
Clc1sc(cc1)C=1Nc2nc(ccc2C(=O)C=1)C	701192	1	3.045	276.741
Brc1cc(Br)cc2c1N=C(NC2=O)C[N@H+](Cc1ccc(cc1)C)C	746007	0	2.841	452.163
[Sn+4]12(OC(=O)C=3N1C(=CC(=O)C=3)C(O2)=O)([CH-]CCC)[CH-]CCC	628580	1	4.261	411.017
Clc1nc(SC)nc2Sc3n(c4cc(OC)c(OC)cc4n3)[C@@H](O)c12	697785	1	4.289	396.872
O(c1cc(O)c(N)cc1)c1ccc(cc1)C1(C2C[C@H]3[C@H]4C1[C@H]1[C@H](C3CC(C4)C1)C2)c1ccc(Oc2cc(O)c(N)cc2)cc1	711114	1	6.93	586.719
ClC1=C(OCCCl)C(=O)c2c(C1=O)c(O)ccc2O	660634	1	1.995	303.095
O1[C@H](COC(=O)C)[C@@H](OC(=O)C)[C@@H](OC(=O)C)[C@@H]1n1c2NC=NC(=O)c2nc1	66386	0	-1.111	394.336
ClCC(=O)Nc1nc(CC)c(cc1C#N)C	747815	0	2.186	237.685
O=C1c2c(ccc(c2)CC)C(=O)c2c1cccc2	7216	0	3.75	236.265
S=C(N(CCc1ncccc1)C)[N-]\N=C(/c1ccccc1)\c1ncccc1	689532	1	5.078	374.482
S(Cc1ccc(N(C=O)C)cc1)c1ccccc1	89353	0	3.202	257.351
Clc1cc(ccc1)C(=O)N[C@@H]([C@H](O)C(O[C@@H]1C[C@@]2(O)[C@@H](OC(=O)c3ccccc3)[C@H]3[C@@](C)([C@@H](O)C[C@H]4OC[C@@]34OC(=O)C)C(=O)[C@H](OC(=O)C)C(C2(C)C)=C1C)=O)c1ccccc1	662158	1	3.719	888.351
O(C)c1ccc(cc1)[C@H]1C(=NNC1=O)C	109893	0	0.818	204.225
BrCc1nc(nc(n1)N)N1N=C(CC1(C)C)C	696916	1	1.521	299.17
O(C)c1c(OC)c-2c(cc1O)C(=O)C(=O)c1cc(OC)ccc1-2	708791	1	2.517	314.289
n1ccc(cc1)CCc1c2c(ccc1)cccc2	14049	0	4.018	233.308
Clc1ccc2c(nc(cc2[C@@H](O)C[NH+](CC)CC)-c2ccc(Cl)cc2)c1C	32936	1	4.478	404.353
O=C(C1CCCC1)c1ccccc1	10749	0	3.24	174.239
[N+](Cc1ccc(cc1)C[N+](CCCCCC)(C)C)(CCCCCC)(C)C	625455	1	3.749	362.635
n1cccnc1/C(=N/Nc1ncccc1)/c1ccccc1	693625	1	2.804	275.308
S([C@H](C(=O)[O-])C)c1ccccc1	115081	0	0.863	181.232
O=C(C[C@H]([NH+]1CCC(CC1)C)C(=O)c1ccccc1)c1ccccc1	387	0	2.823	336.447
S(C)c1nc(\N=C\c2ccccc2)c2c(oc(c2-c2ccccc2)-c2ccccc2)n1	745880	0	7.08	421.514
[NH2+](C[C@H](CCCC)CC)C1CCCCC1	6274	0	3.428	212.395
s1cc(nc1N1C(=O)[C@H]2[C@H]([C@H]3O[C@@H]2CC3)C1=O)C	101200	0	0.298	264.3
ClC=1N2[C@@H](Nc3cc(C)c(cc23)C)C(=C2C=1CCCC2)C#N	682007	1	5.301	311.809
O(C)c1cc(ccc1)C=1Nc2c(cccc2)C(=O)C=1	654983	1	2.945	251.28
O1c2c(cc3OCOc3c2)[C@H]([C@H](C)[C@H]1O)c1cc(OC)c(OC)c(OC)c1	381586	1	3.197	374.384
Ic1cc(I)cc2c1O[Sn](OC2=O)(CCCC)CCCC	628563	1	6.136	620.836
O1c2c3C[N@@H+]([C@@H]4[C@H](c3ccc2OC1)[C@H](O)Cc1c4cc2OCOc2c1)C	406034	1	0.768	354.377
O1C[C@](N=C1CCCCCCCCCCC)(COC(=O)c1ccccc1)C	17739	0	6.61	373.529
ClC=1Sc2n(C=1)c(C(=[NH2+])NC(=[NH2+])N)c(n2)-c1cc(OC)c([N+](=O)[O-])cc1OC	726311	1	1.681	425.85
s1cc(nc1C)-c1cc(Nc2scc(n2)-c2ccc(OC)cc2)ccc1	730246	1	4.971	379.498
Brc1cc(Br)ccc1N	88324	0	2.58	250.919
S(=O)(=O)(N)c1ccc(N=N[C@@H]2C(=NN(C2=O)C2=NC(=C(C#N)C(=O)N2C)c2ccccc2)C)cc1	745587	0	2.032	490.495
S(=O)(=O)(Nc1ccc2c(cccc2)c1[N+](=O)[O-])c1ccc(cc1)C	10415	0	3.606	342.369
O=C(NCCCCCCC[NH+]1CCCCCCC1)C(C1CCCCC1)C1CCCCC1	663857	1	6.331	433.733
O(C)c1ccc(cc1)\C=C(\[N+](=O)[O-])/C	65601	1	2.307	193.199
Clc1cccc(Nc2ncccc2C(=O)[O-])c1C	335505	0	2.075	261.684
[Sn]1(O[C@H](CO1)C[NH+]1CCOCC1)(CCCC)CCCC	633511	1	1.865	393.129
O1CC=2Oc3c(cc4OCOc4c3)[C@@H](C=2C1=O)c1cc(OC)c(OC(=O)C)cc1	675370	1	2.561	396.347
O=C1N=C(NC(c2ccccc2)(c2ccccc2)c2ccccc2)C=CN1CC[NH2+]CCN1C=CC(=NC1=O)NC(c1ccccc1)(c1ccccc1)c1ccccc1	639796	1	6.371	776.946
[P+](C1c2c(-c3c1cccc3)cccc2)(c1ccccc1)(c1ccccc1)c1ccccc1	67714	1	8.023	427.496
Oc1cc(nc2ncccc12)NC(=O)C	66417	0	0.478	203.197
O1C[C@H]2[C@@H]([C@@H](c3c(cc4OCOc4c3)[C@@H]2O[C@@H]2O[C@H]3[C@@H](O[C@@H](OC3)c3ccccc3)[C@@H](O)[C@H]2O)c2cc(OC)c(OC)c(OC)c2)C1=O	42076	1	2.783	664.653
S1c2nc(SC)nc(NC(C)C)c2[C@@H](O)n2c3c(nc12)cccc3	711087	1	4.522	359.469
[As](S[C@@H]1OC[C@H](OC(=O)C)[C@@H](OC(=O)C)[C@H]1OC(=O)C)(C)C	727219	1	1.014	396.288
OCc1n(nnc1CO)-c1ccccc1	79538	0	0.673	205.213
O1C(c2c(cccc2)C1=O)(c1cc(C(C)C)c(O)cc1C)c1cc(C(C)C)c(O)cc1C	2186	1	7.367	430.535
O(C)c1c(OC)cc(cc1OC)[C@H]1N(N=C(C1)c1ccc(N(C)C)cc1)C(=O)C	744677	1	2.864	397.467
O=C1N(N=Nc2c1cccc2)c1ccccc1	118293	0	3.408	223.23
Clc1c2NC=C(C(OCC)=O)C(=O)c2cc2n(OCC)nnc12	748937	0	-0.183	336.73
[nH]1ncc2c1ncnc2NCC	4064	0	0.59	163.18
S=C(N)[N-]\N=C\c1ncccc1O	95678	1	1.327	195.222
OCCN(CCC#N)c1cc(ccc1)C	329205	0	1.917	204.268
O=[N+]([O-])c1ccc(cc1)\C=N\N(C)c1ncccc1	129743	0	2.937	256.26
o1c2c(cc1)c(OC)c(C(=O)C)c(OCCCCOc1c(C(=O)C)c(OC)c3c(occ3)c1OC)c2OC	743185	1	4.109	526.532
Clc1c(Cl)c(Cl)c2c(c1Cl)C(=O)N(N(C)C)C2=O	64859	0	3.234	327.979
[Cu+2]12(Oc3c4[n+](O1)c1c([n+]([O-])c4ccc3)c(OC)ccc1)Oc1c3[n+](O2)c2c([n+]([O-])c3ccc1)c(OC)ccc2	742255	0	0.368	577.989
S(=O)([C@@H]1CC(O[C@H](CCC\C=C\[C@H]2[C@@H](C[C@@H](O)C2)[C@@H]1O)C)=O)c1ccc(O)cc1	692303	1	2.584	422.535
ClC=1C(O)=C(C#N)[C@]2(C#N)[C@](O)(N(C(C)=C2C(OCC)=O)c2ccc(cc2)C(=O)C)C=1Cl	741199	0	2.351	474.293
O=[N+]([O-])c1cc([N+](=O)[O-])ccc1-[n+]1cc2c(cccc2)cc1	338048	1	3.708	296.258
N(=C\c1ccccc1)/c1ccc(N(C)C)cc1	32147	0	3.588	224.301
P(=O)([O-])(C(=O)Nc1ccccc1)c1ccccc1	52931	0	1.069	260.205
O1[C@H]([C@H]([C@H](OC)[C@@H](CCC(=O)[C@@H]([C@H](OC)CC(=O)[O-])C)C)C)[C@H](\C=C\[C@@H](OC)C[C@@H](O)[C@H](\C=C\[C@@H](OC)C[C@H](OC)[C@@H]([C@@H]2OC(=O)C=C([C@H](OC)[C@H](OC)C\C(=C\C=C\C1=O)\C)[C@@H]2O)C)C)C	702923	1	3.17	950.179
O=C(c1ccc(cc1)C)c1ccc([N+](=O)[O-])cc1	32	0	3.614	241.242
Fc1cc2c(-c3c(ccc(NC(=O)C)c3)C2=O)cc1	107604	0	2.248	255.244
[Re]123([P+](c4ccccc4)(c4ccccc4)c4ccccc4)([NH+]=O)(c4c1cc2[c-]34)[C-]=S(C)C	621326	1	4.709	614.713
S(CC(C)C)c1ncnc2nc[nH]c12	22768	0	2.035	208.283
S(C)C1=NC(NC=O)=CC(=O)N1C	748128	0	0.383	199.23
Clc1cc2nc([nH]c2cc1)N	10545	0	1.805	167.596
S1c2n(C=C1CCC)c(\C=N\[N-]C(=[NH2+])N)c(n2)-c1c([N+](=O)[O-])c(OC)ccc1OC	723548	1	2.841	431.469
O1CCC[C@H]1N1C=CC(=NC1=O)N	106043	0	-0.481	181.192
O(CC)c1nc2c(nc1NCc1ccccc1)nc(nc2N1CCCC1)N1CC[NH2+]CC1	717863	1	2.55	435.545
S(=O)(=O)(Nc1cc([nH]c1-c1ccccc1)-c1ccccc1)c1ccc(N)cc1	749249	0	4.284	389.47
O1c2c(C=CC1(C)C)c1NC(=O)C=C(c1cc2)C	700280	1	2.486	241.285
Cl/C(/C(/[N+](=O)[O-])=C(\Sc1ccccc1)/N1CCOCC1)=C(\Cl)/Cl	673151	1	4.211	395.689
O=C1NC(=O)Nc2nn[nH]c12	756	0	-0.629	153.099
O=C(C)C=1N2[C@@H](N(N=1)c1ccccc1)[C@H]1N(c3[nH]c(cc23)-c2ccccc2)C(=NN1c1ccccc1)C(=O)C	745978	0	5.248	515.565
O(C)c1cc(N2C(=O)C=CC2=O)ccc1N1C(=O)C=CC1=O	112780	0	0.93	298.25
O=C([O-])C(C)(C)c1ccccc1	29095	0	0.9	163.193
Clc1nc2c(nc1Cl)cccc2	33437	0	3.041	199.037
O=[N+]([O-])c1cc(ccc1)Cn1c2c(c3c(nc(nc3N)N)cc2)cc1	339579	1	2.932	334.332
O1[C@]23[C@H]([C@@H]4CC[C@@](O)(C)[C@]4(C[C@H]12)C)CCC1=CC(=O)[C@@H](C[C@@]13C)C	37978	0	2.926	330.461
O1c2cc(ccc2OC1)CCNC(=O)Cc1ccc([N+](=O)[O-])cc1	114925	0	2.64	328.319
Fc1cc(ccc1)C=1Nc2ncc(cc2C(=O)C=1)C	676190	1	3.041	254.259
O=C(N)c1nc(nc(N)c1)N	47802	0	-0.952	153.142
S(c1cc2c(nc(nc2N)N)cc1)c1cc2c(nc(nc2N)N)cc1	695267	1	2.198	350.401
O1C[C@]12[C@H]1O[C@H]3C=C(CC[C@]3(C)[C@]2(C)[C@@H](OC(=O)C)C1)C	267033	1	1.619	292.37
S1c2n(C=C1CCC)c(\C=N\[N-]C(=[NH2+])N)c(n2)-c1ccc([N+](=O)[O-])cc1	723552	1	2.873	371.417
ClC1=CN(\C(=C\C(OCC)=O)\C(OCC)=O)C(=O)N(CC(OCC)=O)C1=O	704888	1	0.463	402.784
O1[C@H]2[C@@H]([C@@H](OC(=O)C(C)=C)C\C(=C/CCC(=C)[C@@H]2OC(=O)C)\CO)C(=C)C1=O	666114	1	2.689	390.427
O(C)c1cc(ccc1OC)C=1CCCCCC=1	127371	0	4.194	232.318
O(C(=O)c1ccccc1C)C	9402	0	2.171	150.174
o1c(ccc1[N+](=O)[O-])\C=C\C(=O)N(C1CC([NH2+]C(C1)(C)C)(C)C)C1CCCCC1	632541	1	2.493	404.523
S\1[C@H](N(NC(=O)CCCCCCCCC(=O)NN2[C@@H](S\C(=C\c3cc(O)c(O)cc3)\C2=O)c2c3c(ccc2O)cccc3)C(=O)/C/1=C\c1cc(O)c(O)cc1)c1c2c(ccc1O)cccc2	697192	1	8.609	927.051
[NH2+]1CC[NH+](CC1)CCNc1nc2c(c3[nH]c4c(c13)cccc4)cccc2	736607	1	0.626	347.457
Oc1cc2c(N3c4c(C2=O)c(NCCC[NH+](CCCNc2c5c6N(c7c(cc(O)cc7)C5=O)C(=O)N(CC[NH+](C)C)C(=O)c6cc2)C)ccc4C(=O)N(CC[NH+](C)C)C3=O)cc1	710559	1	-0.935	846.95
Fc1cc(ccc1)[C@H]1Nc2c(cc3OCOc3c2)C(=O)C1	700267	1	2.898	285.27
[n+]1(n-2c(cc1C13CC4CC(C1)CC(C3)C4)/C(/c1c-2cccc1)=C\c1ccc(N(C)C)cc1)C	699475	1	7.085	436.611
O(C)c1cc2c3c4c(nc2cc1)C(=O)c1c(nccc1)-c4ncc3	683785	1	2.985	313.31
Clc1cc2nc(sc2cc1F)NC(=S)N1N=C(C)\C(=N/Nc2ccc(S(=O)(=O)N)cc2)\C1=O	745605	0	4.176	525.987
O=C1N[C@@H]([C@H](CC)C)C([O-])=C1C(=O)C	525816	0	-0.133	196.223
S=C1N=C(Nc2n(cnc12)[C@@H]1O[C@H](CO)[C@@H](O)[C@H]1O)N	133418	0	-1.481	299.306
[NH2+]1CC[NH+](CC1)CCn1c(ccc1C)C	62606	0	-1.811	209.331
S(C1=CCC[C@@H](C(C#N)C#N)[C@@H]1Sc1ccccc1)c1ccccc1	696891	1	5.345	362.511
FC(F)(F)c1cc(Nc2ccccc2C(=O)[O-])ccc1	82699	0	2.478	280.222
Brc1c(nc(SC)nc1N1CC1)C	50199	0	2.665	260.154
[As](SC[C@@H](OC(=O)C)COC(=O)C)(C)C	724600	1	1.229	296.215
O(CCOCCCC)C1=CC(=O)c2c(C1=O)c(O)ccc2O	661417	1	2.159	306.311
[Cu+2]12(Cl)[SH]=C(N3CCCCCC3)[N-][N@H+]1[C-](C=1N2C=CNC=1)C	641297	1	0.416	378.403
[nH]1cc-2c(CCc3c-2ncnc3)c1-c1ccccc1	748033	0	3.502	247.295
S(=O)(=O)(CC)c1cc2N3c4c(S(=O)(=O)N=C3Oc2cc1)c[nH+]cc4	743325	0	1.978	366.392
O=C([O-])c1cc([N+](=O)[O-])ccc1-c1ccc([N+](=O)[O-])cc1C(=O)[O-]	128627	0	-0.552	330.206
O=C(C(C[NH+](C)C)C[NH+](C)C)C1CC1	28989	0	-2.164	200.321
O1[C@](COC(=O)C)([C@H](OC(=O)C)[C@H](OC(=O)C)[C@H]1COC(=O)C)c1ccc(cc1)C	105584	0	1.268	422.426
Oc1c(O)cc(cc1O)[C@H]([C@@H](CC)c1ccccc1)CC	37642	0	4.95	286.365
P1(OCC([N+](=O)[O-])(CO1)C)(=O)NC1CCCC1	101780	0	0.752	264.215
Clc1ccccc1COc1ccc(cc1)C	11292	0	4.547	232.705
OCCN1CC(N=C1CCCCCCCCCCCCCCCCC)(C)C	17754	1	7.211	380.651
[NH+]1(CCCCC1)CCCCNc1c2c(c-3c(Cc4c-3ccc3c4cccc3)cc2)ccc1	729110	1	5.256	421.596
s1c2c(-n3nnc(c3NC2=O)C#N)c2c1cccc2	742114	0	2.128	267.266
S1C[C@H](N(C1)C(=O)C=1[C@H](NC(=S)NC=1C)c1cc(O)ccc1)C(OC)=O	748858	0	1.926	393.48
S(CC(=O)Nc1ccc(OC)cc1)C(=O)N	13350	0	0.989	240.279
Oc1c2c(cc3c1C(=O)C[C@H](CC)[C@]3(C#N)C(OC(C)(C)C)=O)C(=O)c1c(cccc1)C2=O	628120	1	3.946	445.464
O(C)c1ccc(OC)cc1[C@@H]1CCCc2c3c(nc(nc3N)N)ncc12	717167	1	2.764	351.402
O(C)c1ccccc1\C=N\[N-]C(=[NH2+])[N-]\N=C\c1ccccc1OC	69413	1	2.785	324.357
Cl[C@@H]([N+](=O)[O-])C	6154	0	0.906	109.512
O=C/1Nc2c(cccc2)\C\1=N\N1CCCCCC1	82816	0	2.018	243.304
O(C(=O)CCc1ccccc1)C	10128	0	2.176	164.201
FC(F)(F)C(=O)[C@H]1CCCCC1=O	42753	0	2.109	194.151
Clc1ccc(-n2nc(C)c([C@]3(O)c4cc(F)ccc4NC3=O)c2N)cc1	744244	0	2.47	372.781
Fc1ccc([N+](=O)[O-])cc1	10281	0	1.929	141.1
O(C(=O)C([NH3+])(C)C)CC	28848	0	-0.801	132.181
S(C)C1=NC(N)=C(C[NH2+]Cc2ccccc2)C(=O)N1C	748301	0	0.291	291.392
O1[C@@H]2[C@H]3OC(=O)[C@@]45O[C@@H]4C[C@@](O)([C@@H]([C@@H]2C(O)(C)C)C1=O)[C@@]35C	129536	0	-1.325	310.299
O(C)c1cc(OC)ccc1C=1CCCC=1	116893	0	3.282	204.265
O1[C@H](CC(C)C)C(=O)N2[C@@H](CCC2)C(=O)N[C@@H]([C@@H](CC)C)C(=O)N(C)[C@@H](C(C)C)C(=O)N(C)[C@@H](C)C(=O)NCCC1=O	236580	1	1.779	593.755
O=C(N)c1ccccc1C(=O)N	5512	0	-0.166	164.161
n1cnc2n(ncc2c1N)C(C)C	18275	0	0.618	177.206
Clc1cc2N=NN(c3n(ncc3CC(=O)[O-])C)C(=O)c2cc1	749541	0	1.038	318.695
OCC[NH2+]Cc1ccccc1	11271	0	-0.403	152.214
O1CCN(CC1)C1=CC(=O)c2c3c1cccc3ccc2	150163	0	2.239	265.306
Clc1cc(NC(=O)N(CCO)C)c(cc1)C	372134	0	1.763	242.702
O1CCN(CC1)C(=O)CCCCCCC	3186	0	2.215	213.317
O=C1c2n(C)c(-c3ccccc3)c(c2C(=O)C=C1C)C(OCC)=O	718530	1	3.809	323.343
O=C([O-])c1cc2c(cc1N)cccc2	37061	0	0.147	186.187
OC1(CCC1)[C@@H](C(=O)[O-])c1ccccc1	21323	0	0.194	205.23
P1(O[C@H](CCC)[C@H](CO1)CC)(=O)N(CCOC(=O)C)CCOC(=O)C	23223	0	1.216	379.386
Clc1n(c2c(cc(OC)c(c2)C)c1\C=C\1/c2cc(O)ccc2NC/1=O)Cc1ccccc1	723564	1	5.5	444.91
N(N)CCC#N	354692	0	-1.007	85.1078
[nH]1c2c(nc1N\N=C(/C)\c1ncncc1)cccc2	703104	1	2.136	252.275
[Se](CCP(OCC)(OCC)=O)[C@@H]1CC(O[C@H](CCC\C=C\[C@H]2[C@@H](C[C@@H](O)C2)[C@@H]1O)C)=O	704066	1	2.552	525.475
O=C/1/C(/CN(C\C\1=C\c1ccccc1)C(=O)CC[NH+](C)C)=C\c1ccccc1	634784	1	1.86	375.483
Clc1cc(Cl)ccc1C(Oc1c2c(sc1C(OCC)=O)N(c1ccccc1)C(=S)N(C2=O)c1ccccc1)=O	671141	1	8.708	597.489
s1c2N=C(NC(=O)c2c(C)c1C(OCC)=O)\C=C\c1cccc(OC)c1OC	746015	0	3.696	400.448
S(S\C(=N\c1ccc(OC)cc1)\c1oc([N+](=O)[O-])cc1)\C(=N\c1ccc(OC)cc1)\c1oc([N+](=O)[O-])cc1	704593	1	6.752	554.552
O(C)c1cc2C3=NCCN(c4c3c(Nc2cc1)c([N+](=O)[O-])cc4)CC	658354	1	3.422	338.361
Clc1cc2c(C=3N(CCC[NH3+])C(=O)c4cc([N+](=O)[O-])ccc4C=3C2=O)cc1	736494	1	1.002	384.793
O1C[C@H]2[C@@H]([C@@H](c3c(cc4OCOc4c3)[C@H]2NC(=O)c2ccccc2)c2cc(OC)c(O)c(OC)c2)C1=O	642288	1	3.282	503.5
Clc1cnc(Oc2ccc(NC(=O)NC(=O)c3ccccc3[N+](=O)[O-])cc2C)nc1	624545	1	3.742	427.798
n1cc2[C@H]3C[C@@H]([C@H](c2cc1-c1ncccc1)Cc1ccccc1C[C@@H]1[C@@H]2C[C@H](c4c1cc(nc4)-c1ncccc1)C2(C)C)C3(C)C	681463	1	8.752	602.81
O1C[C@]1([C@H](OC(=O)c1cc(OC)cc2c1cccc2C)C(=O)N)C	727012	1	1.974	329.347
o1c2c(cc1)c(nc1c2cccc1)Nc1ccc(OC)cc1	730143	1	4.392	290.316
O=C1C=C(Nc2nc(ccc12)C)c1cc2c(cc1)cccc2	679020	1	3.541	286.327
S(OC1C(C)(C)C(OS(=O)(=O)c2ccc(cc2)C)C1(C)C)(=O)(=O)c1ccc(cc1)C	92391	0	4.899	452.584
Clc1ccccc1-c1sc2c(n1)cccc2	33753	0	4.503	245.727
O1[C@@H]2C[C@H](OC(OC[C@H](O)CO)=O)[C@@]3([C@H]([C@H](OC(=O)c4ccccc4)[C@]4(O)C[C@H](OC(=O)[C@H](O)[C@@H](NC(=O)c5ccccc5)c5ccccc5)C(=C([C@@H](OC(=O)C)C3=O)C4(C)C)C)[C@]2(OC(=O)C)C1)C	687962	1	3.027	971.994
S(CC[NH+](CC)CC)c1c2cc(OC)ccc2nc2c1cc(OC)cc2	699927	1	3.137	371.516
Clc1cc(cc(Cl)c1O)CCCCCCCC	402634	0	6.596	275.214
O=C(NCC[NH+](C)C)c1cc(cc2c1nc1c(c2)cccc1)C	617961	1	1.625	308.397
O=C([O-])c1ccccc1\C=N\N=C/1\NC=C([N+](=O)[O-])C=C\1	52428	0	-0.521	285.235
O=[N+]([O-])c1ccccc1\C=C\C=C(\C#N)/C#N	659166	1	2.378	225.203
O=NN1C[C@@H](CC[C@H]1C)CC	23225	0	2.161	156.225
P1(O[C@H](CCC)[C@H](CO1)CC)(=O)N1C[C@H](N(P2(O[C@H](CCC)[C@H](CO2)CC)=O)C[C@H]1C)C	23219	0	3.466	494.542
ClCc1c([N+](=O)[O-])cc(cc1[N+](=O)[O-])C(F)(F)F	622627	1	3.161	284.577
O1c2c(cc3OCOc3c2)[C@@H]([C@H](C)[C@@H]1Nc1ccc(cc1)C(=O)[O-])c1cc(OC)c(OC)c(OC)c1	675367	1	3.35	492.497
o1cccc1C(=O)\C=C\c1occc1	18528	0	2.492	188.179
O(CC)C(=O)[C@@H](C(=O)C)CCc1ccccc1	25336	0	2.688	234.291
O(C)c1c(OC)cc(cc1OC)\C=C/1\c2cc(OC)ccc2NC\1=O	134544	1	2.665	341.358
s1c2c(cc1C(=O)c1ccsc1)C(=O)c1sccc1C2=O	682992	1	4.072	330.401
O=C1CCC[N@H+](C1)CC	329700	0	-1.055	128.192
O1[C@H]2[C@H](C=C3[C@](CCC[C@@H]3C)(C2)C)C(=C)C1=O	333843	1	3.311	232.318
O=[N+]([O-])c1cc\2c(-n3[n+](C)c(cc3/C/2=C\c2ccc(N(C)C)cc2)-c2ccccc2)cc1	720622	1	6.088	423.486
[nH]1c2C=3N(C=CC4=C5C(=NC=34)C=CC=C5)C=Cc2c2c1cccc2	677939	1	4.542	307.348
ClC(Cl)(Cl)[C@@H](NC(=O)C)NP(=O)(N(C)C)N(C)C	743361	0	-0.333	339.587
O(CC)c1ccccc1\C=C\C(=O)CCC(=O)[O-]	80984	0	0.731	247.266
Clc1cc(SCC(OCC)=O)c(S(=O)(=O)NC2=NC(=O)N(N2)c2ccc(cc2)C)cc1C	744707	0	4.374	496.988
S(C)c1[nH]c2c(n1)ncnc2	24128	0	0.845	166.204
O1[C@@H](N2C=CC(=O)NC2=O)CC=C1C(OCC)=O	742557	0	-0.301	252.223
O1C(=O)C(=O)N(CC(=O)[O-])C1=C	117390	0	-1.9	170.1
O=C1N(CCC1)C	4594	0	-0.165	99.1311
O1CC[C@@H]([C@H](OC(=O)C)c2ccccc2)C1=O	206613	0	1.639	234.248
O1[C@@H]2[C@@]1(CO)[C@@H](O)C=CC2=O	266032	1	-1.212	156.136
O1CCC[C@H]1n1c2ncnc(N(C)C)c2nc1	45149	0	0.944	233.27
O1C(=CC(=O)[C@H](C(=O)c2ccccc2)C1=O)c1ccccc1	6844	0	2.895	292.285
Clc1cc(N=C=S)c(cc1)C	134677	0	3.739	183.658
Oc1c2c(C(=O)C=C(N3CC[NH2+]CC3)C2=O)c(O)cc1	658144	1	-0.765	275.28
O1c2c(C(=O)C(O)=C1c1cc(OC)c(OC)cc1)c(OC)cc(OC)c2	102049	1	2.533	358.342
O1CCC[C@H]1N1C=CC(=NC1=O)NC	106581	0	-0.275	195.218
Oc1cc(ccc1)-c1nnc(n1N)-c1cc(O)ccc1	111296	0	2.068	268.271
O=C1N(C)C(=O)N(C)C(N)=C1C=O	163561	0	-1.208	183.165
Cl\C(=C(\C=O)/c1cc(OC)c(OC)cc1)\c1cc(OCCC)c(OCCC)cc1	650594	1	5.476	418.91
Oc1cc2c(cc1)c(NC(=O)C)ccc2	4966	0	1.616	201.221
S1c2c(N(c3c1cccc3)CCC[NH+](C)C)c1c(cc2)cccc1	18891	1	3.423	335.486
O=C1NNC(=O)C=C1	8823	0	-1.009	112.087
O(C)c1ccc2c([nH]c3c2CC[N@H+](Cc2ccccc2)[C@H]3C)c1[N+](=O)[O-]	628648	1	2.734	352.407
O1Cc2c(N=C1NNC=1OCc3c(N=1)cccc3)cccc2	741239	0	3.01	294.308
S1c2c(NC(=O)[C@H]1[C@H]1OC(=CC1=O)c1ccccc1)cccc2	707087	1	2.669	323.366
O(C)c1cc2-c3nn(c4c3c(Nc2cc1)c(cc4)C(=O)NCCC[NH+](CCCNC(=O)c1c2Nc3c(cc(OC)cc3)-c3nn(c(c23)cc1)CC[NH+](C)C)C)CC[NH+](C)C	710552	1	0.754	817.013
S1[C@@H]2[C@@H]3[N@H+]([C@@H](c4c2c(OC(=O)C)c(c2OCOc24)C)COC(=O)[C@]2([NH2+]CCC=4[C@H]5[C@H](NC2=4)C=CC=C5)C1)[C@@H](O)[C@@H]1[N@@H+]([C@H]3c2c(cc(C)c(OC)c2O)C1)C	648769	1	-0.757	759.888
O=C(NCC[NH+](C)C)c1c2nc(c3c(c2ccc1)cccc3)-c1ccncc1	617953	1	1.507	371.455
O1CC[NH+](CC1)C[C@@H](O)CNc1c2c(ccc1)C(=O)c1c(cccc1)C2=O	746493	0	0.372	367.418
BrC/C(=C(/Cl)\CCl)/CC[C@H](Cl)C(Cl)(C)C	670806	1	5.106	356.942
O1[C@@](C\C(=C/CCCCCCC\C=C\CCCCCCCC)\C1=O)(\C=C\C(OC)=O)CO	703764	1	7.744	448.635
O(CC)c1ccccc1\C=N\N=C\c1ccccc1O	119785	0	3.585	268.31
O1CC2=C(C=C3N(Cc4c3nc3c(cccc3)c4\C=N\NC(=O)[C@@H]([NH3+])CO)C2=O)[C@@](O)(CC)C1=O	681633	1	-1.436	478.477
Br[C@@H]1CCCO[C@@H]1OC	2661	0	1.418	195.054
S(=O)(=O)(\C(=C\c1c2c([nH]c1C)cccc2)\C(OC)=O)c1ccccc1	746694	1	3.399	355.408
O1CCN(CC1)C(=O)c1ccc([N+](=O)[O-])cc1	4261	0	0.826	236.224
Clc1ccc(cc1)C(=O)C=1[C@H](NC(=O)NC=1C)c1cc(OC)ccc1OC	744259	0	3.245	386.829
s1c2c(CCC2)c(C(=O)N)c1NC(=O)COC(=O)Cc1ccccc1F	746340	0	2.277	376.402
O(C)c1ccc(cc1)[C@H]1NC(=O)NC(CCC)=C1C(OCC)=O	741251	0	2.377	318.368
O=C1N=C(NC=2NC[N@@H+](CC1=2)CCOCCOCC)N	92597	0	-2.384	284.335
O=[N+]([O-])c1ccc(cc1)\C=N\N=C\c1ccc([N+](=O)[O-])cc1	863	0	3.284	298.254
O1CC[NH+](CC1)CCOc1cc(ccc1)\C=C\1/C[C@H]2[C@H]3[C@H](CC[C@]2(C)[C@H]/1O)[C@@]1(C(C[C@@H]([NH+]2CCCC2)CC1)=CC3)C	736754	1	2.69	562.826
O=C1N=C(Nc2ncc(nc12)CCNc1ccc(cc1)C(=O)N[C@@H](CCC(=O)[O-])C(=O)[O-])N	79249	0	-2.931	453.408
O1c2cc(OC(=O)C)ccc2C=C([C@H]1C)c1ccc(OC(=O)C)cc1	95381	1	3.426	338.354
S=C1NC(=O)/C(/N1)=C/c1ccccc1O	2592	0	1.588	220.248
P(OCC)(OCC)(=O)CCCOc1cc2N=C[C@H]3N(CCC3)C(=O)c2cc1OC	744024	0	1.392	424.428
s1cc(nc1NC(=O)COc1ccc(cc1)\C=C\1/Oc2c(ccc(OC)c2)C/1=O)C(OCC)=O	743687	0	3.37	480.49
s1cccc1\C=N\C(\C=C/C(OC)=O)(C#N)C#N	698280	1	1.964	259.284
Oc1c2ncccc2c(cc1\C=C\c1[n+](c2c(cc(cc2)C)cc1)C)C	86371	1	5.828	341.426
O=[N+]([O-])\C(=C\c1c2c([nH]c1)cccc2)\C	65628	1	2.617	202.209
O(C)c1c(OC)cc(cc1OC)/C(=C\c1ccc(OC)cc1)/C(=O)NC	638410	1	2.918	357.4
O=C(Nc1c2c(ccc1)cccc2)[N-]\N=C(\CC[NH+]1CC1)/C	101247	0	0.422	296.367
Clc1ccc(S(=O)(=O)[O-])cc1N1N=C(C)[C@H](N=Nc2ccccc2)C1=O	326207	0	1.204	391.809
Clc1cc(S(=O)(=O)NC)ccc1Cl	9991	0	2.069	240.107
Clc1ccc(Cl)cc1NC(=O)N1CCN(CC1)C(=O)Nc1cc(Cl)ccc1Cl	35926	0	4.599	462.157
O(C(=O)c1c(C)c([nH]c1C)C(OCC)=O)CC	2046	0	2.255	239.268
S(=O)(=O)(N[C@@H](CC(C)C)C(OC)=O)c1cc2nc([nH]c2cc1)NC(OC)=O	720243	1	1.984	398.434
O=C1N([C@](O)(c2c1cccc2)c1ccccc1)c1cc[nH+]cc1	69359	0	3.195	303.335
O1[C@H]([C@@H](O)C=O)[C@H](O)[C@H](O)C1=O	656	0	-2.08	176.124
OC=1NC(=O)C=C(C=1)C(=O)[O-]	5214	0	-1.769	154.1
O=[N+]([O-])C\C(=C\C)\c1ccccc1	742885	0	2.788	177.2
ClC=1OC(=O)C2=C(OC(=NC2=O)N2CC[NH2+]CC2)C=1	702324	1	-0.958	284.676
Clc1cc2nc(oc2cc1)N	24995	0	1.815	168.58
O=C1C2=C(N(CCC[NH2+]CCCn3ccnc3)C(=O)c3c2cccc3)c2c1cccc2	728856	1	0.454	413.492
P(OCCCCCCCC)(OCCCCCCCC)OCCCCCCCC	97316	0	8.508	418.634
[N+]1(CCCC1)(CCCC)C	747254	0	0.755	142.262
O(C)c1cc2C3=NC(=O)N(c4c3c(Nc2cc1)c([N+](=O)[O-])cc4)CCC[NH+](C)C	691842	1	1.465	396.42
ClC=1NC(=S)c2c(n(nc2)C)N=1	19057	0	1.496	200.649
Clc1ccc(cc1)C(Oc1ccc(cc1)\C=C/1\CCC[C@H](C[NH+](C)C)C\1=O)=O	697444	1	3.811	398.902
Clc1ccc(cc1)-c1[nH]nc(c1)/C(=C/c1[nH]c2c(c1)cccc2)/C#N	749219	0	5.586	344.797
S(CCCCC)c1nc(nc2nc[nH]c12)N	35862	0	2.402	237.325
O=C([O-])[C@@]1(CC12c1c(-c3c2cccc3)cccc1)C	116462	0	1.706	249.284
Fc1cc(O)c2ncccc2c1	673450	1	1.979	163.148
O(CC=C)c1cc(ccc1C)C	849	0	3.402	162.228
O([C@H](CCCCCC)C)C(=O)c1ccccc1C(=O)[O-]	524615	0	2.915	277.336
O=C1NC(C(OCC)=O)=C([O-])c2c1c(nc(c2)-c1ccccc1)C	745976	0	0.998	323.323
O1c2c(C=CC1=O)c(OC)c1c(occ1)c2OC	401288	0	2.17	246.215
S=C(N)[N-]\N=C\1/C[C@@H](CC/C/1=C(\C)/C)C	77188	0	3.594	224.346
O(CCCC)c1ccc(NC(=O)n2ncc3c2cccc3)cc1	749557	0	4.348	309.362
O=C(NCc1ccccc1)c1cccnc1	59992	0	1.47	212.247
Clc1nc2nc([nH]c2nc1Cl)CO	166583	0	0.775	219.028
[Sn](OC(=O)CCCCCCCCC=C)(CCCC)(CCCC)CCCC	99171	1	9.134	473.32
O([C@H](C)c1ccccc1)C[C@@H](O)C	13527	0	1.849	180.244
O1[C@]2(CC[C@]1(C(OCC)=O)C(C(OC)=O)=C2C(OC)=O)c1c(cccc1C)C	663570	1	3.024	388.411
[Pd+2]12([SH]=C(N)[N-][N@H+]1[CH-]c1c(O2)c(OC)ccc1)([O-])N1CC=CC=C1	638294	1	0.446	427.795
S(c1n(cnc1[N+](=O)[O-])C)c1[nH]nc(n1)N	341074	0	0.675	241.23
S(CC(=O)N)c1nc(nc2nc[nH]c12)N	38308	0	-0.529	224.243
O=C([O-])c1cc(N)c(N)cc1	60732	0	-1.508	151.143
O=C(N)c1ccc(N=NN(CCCC)C)cc1	87429	0	2.544	234.298
O=C/1Nc2c(cccc2)\C\1=C(\C#N)/C(OCC)=O	92042	0	1.255	242.23
O1c2c(cc3OCOc3c2)[C@@H]([C@@H](C)[C@H]1[NH2+]CCO)c1cc(OC)c(O)c(OC)c1	671177	1	1.344	404.434
O(C)c1cc2NC(=O)c3n(-c2cc1)cc1cc(C)c(cc13)C	747520	1	3.816	292.332
BrC[C@H](Br)C(=O)N	144295	1	0.79	230.886
O1C[C@H]2[C@@H]([C@H](c3c(cc4OCOc4c3)[C@H]2Nc2cc3OCCOc3cc2)c2cc(OC)c(O)c(OC)c2)C1=O	628674	1	3.668	533.526
O=C1[C@H](CCC[C@H]1C[NH+](C)C)C[NH+]1CCCCC1	38534	1	-0.79	254.411
O1[C@@H]2O[C@@H](Oc3c2cccc3)c2c1cccc2	114902	0	3.221	226.227
Clc1ccccc1N1CC[NH+](CC1)C[C@H](O)COc1cc(ccc1)C	91361	0	2.66	361.886
Brc1c(C)c(O)c(Br)c(Br)c1Br	4866	0	5.067	423.722
Clc1n(c2c(cc(OC)c(c2)C)c1\C=C\1/c2c(NC/1=O)cccc2)Cc1ccc(OC)cc1	723570	1	5.726	458.936
O=C1CC[C@@]2([C@@H]3[C@H]([C@@H]4CC[C@](O)(C(=O)COC(=O)C(CC)CC)[C@]4(C[C@@H]3O)C)CCC2=C1)C	17242	0	3.704	460.603
Clc1cc(c2NC(Sc2c1)=S)C	26436	0	4.42	215.723
O1[C@](NC(=O)[C@H]2C[C@H]3[C@H]([N@@H+](C2)C)Cc2c4c3cccc4[nH]c2)(C(C)C)C(=O)N2[C@H](Cc3ccccc3)C(=O)N3[C@H](CCC3)[C@@]12O	409663	0	2.741	612.738
n1cc(ccc1\C=C(\CC)/CC)CC	63311	0	4.363	189.297
O1C=2N(c3c1cc(cc3)C(=O)NCCC[NH+](C)C)C(=O)c1c(C=2)cccc1	729605	1	0.769	364.418
Oc1cc2c(-n3c4c(C2=O)c(NCCC[NH+](CC)CC)ccc4nc3)cc1	637994	1	1.606	365.449
O1[C@](OC[C@H]1CCCCO)(CCc1ccc(OC)cc1)C	40547	0	2.55	294.386
Clc1ccc(S(=O)(=O)c2cc(sc2NC(=O)C)[N+](=O)[O-])cc1	696052	1	2.522	360.793
Clc1cc(N2C([NH+]=C([NH+]=C2N)N)(C)C)ccc1CCCCc1ccccc1	128184	1	4.759	385.934
O=C1C=CC(=O)c2c1cc1cc(ccc1c2)CO	727285	1	2.061	238.238
O[C@H]1C[C@@]2([C@H]([C@H]3[C@H](CC2)[C@@]2([C@H](C[C@@H](O)CC2)CC3)C)C1)C	36919	0	3.352	292.456
S1C(=NC(=O)[N-]C1=O)c1occc1	247457	0	1.973	195.175
O=C/1/C(/C[NH2+]C\C\1=C/c1ccccc1)=C/c1ccccc1	609964	1	2.141	276.352
O(C)c1c2c(ccc1OC)C(=CC2)CC(OCC)=O	10178	0	2.608	262.301
[Sn](C1CCCCC1)(C1CCCCC1)(c1ccccc1)c1ccccc1	99173	0	8.026	439.221
O1[C@H](CO)[C@@H](O)[C@@H](O)[C@@H](O)[C@H]1O[C@@H]1C[C@@H]2[C@@]([C@H]3CC[C@@]45[C@@](CC[C@H]4[C@H](C[C@@H](O)[C@@H](O)C(O)(C)C)C)(C5)[C@]13C)(CC[C@H](OC(=O)C)C2(C)C)C	642298	1	2.048	696.908
Clc1c(oc(-c2ccccc2)c1C[NH+](C)C)-c1ccccc1	10636	0	3.73	312.813
[NH2+]=C(N)[N-]\N=C/c1ccc(cc1)\C=N\[N-]C(=[NH2+])N	66832	0	-0.103	246.272
O(C)c1cc2c(cc1OC)C=1N(CCC[NH3+])C(=O)c3cc([N+](=O)[O-])ccc3C=1C2=O	734141	1	0.305	410.4
[nH]1c2c(c3c1cccc3)cc1c(ccnc1-c1ccccc1)c2C	86715	1	5.514	308.376
O1c2c(ccc(OCC[NH+](CC)CC)c2)C(=C(c2ccc(OC)cc2)C1=O)c1ccccc1	102845	1	4.099	444.542
Clc1ccc(cc1)C1=N[C@@H]2SC=C(N2C(=C1)c1occc1)c1ccc(Cl)cc1	745276	0	6.633	425.33
BrC=1CC(=O)c2c(-c3c(C=1)cccc3)cccc2	647350	1	3.877	299.162
O=C1C2=CC[C@H]3[C@@H]4CC[C@H]([C@H]([NH+](C)C)C)[C@]4(CC[C@@H]3[C@]2(CC=C1NC(=O)\C(=C\C)\C)C)C	748913	1	3.511	439.653
s1c(nnc1NC(=O)CCCOc1ccc(OC)cc1)C1CC1	746260	0	2.495	333.405
O1C[C@H]2[C@H]([C@@H](c3c(cc4OCOc4c3)[C@@H]2O)c2cc(OC)c(OC)c(OC)c2)C1=O	36407	1	2.111	414.405
Clc1ccccc1C[NH2+]Cc1nc2c(cc(Cl)cc2)c(-c2ccccc2)c1C(=O)[O-]	748520	0	3.124	437.318
O=C1N(N(C)C(=C1)c1ccccc1)c1ccccc1	57972	0	2.453	250.295
O=C([C@H](C[NH+]1CCCCC1)c1ccccc1)c1ccccc1	33568	1	2.675	294.411
S(CC(=O)Nc1ccccc1C)C(=O)N	13347	0	1.491	224.279
O(C)c1cc(ccc1O)\C=C\C(=O)\C(=C(/[O-])\C=C\c1cc(OC)c(O)cc1)\C=C\C(OCC)=O	734924	1	3.502	465.472
O(C(=O)c1ccc([N+](=O)[O-])cc1)C[C@@H]([NH2+]CC)C1CCCCC1	121027	0	2.518	321.391
O=C1[C@H](CCC[C@@H]1C[NH+]1CCCC1)C[NH+]1CCCC1	665622	1	-0.786	266.422
Clc1ccc(cc1[N+](=O)[O-])-c1nc2SC(=Cn2c1\C=N\[N-]C(=[NH2+])N)CCC	723549	1	3.538	405.862
S(CCO)c1nc2c(n1C)N(C)C(=O)N(C)C2=O	28375	0	0.166	270.308
Brc1ccc(cc1)C(=O)N1O[C@@H](C[C@@H]1Nc1ccc(Br)cc1)C	658228	1	4.695	440.129
O1c2c(N[C@H]1[C@@H]1Oc3c(N1)cc(cc3)-c1ccccc1)cc(cc2)-c1ccccc1	84100	0	6.136	392.449
Oc1c2c(cc(O)cc2)ccc1	7201	0	2.254	160.169
O\N=C/1\c2cc(N)ccc2-c2c\1cccc2	106361	0	2.243	210.231
Oc1ccc(O)cc1C(=O)CC	87567	0	1.752	166.174
Clc1cc(Nc2nc(ccc2C(Oc2cc(OC)ccc2)=O)C(F)(F)F)c(cc1)C	733901	1	6.705	436.812
Brc1ccc(cc1)[C@H](O)CC[N@H+]1CC[C@H]2CC[C@H](C2)C1	95561	0	2.215	339.291
[NH+]1(CCC(Nc2ccc(cc2)C)(CC1)C#N)Cc1ccccc1	73010	0	2.058	306.425
[NH2+](CCCNc1nc2c(c3[nH]c4c(c13)cccc4)cccc2)CCC[NH3+]	736611	1	0.52	349.473
O1[C@@H](Cc2c([C@H]1C)c(O)c1c(C(=O)C(=CC1=O)C1=CC(=O)c3c(C1=O)c(O)c1c([C@@H](O[C@H](C1)CC(=O)[O-])C)c3O)c2O)CC(=O)[O-]	293161	0	-0.763	632.525
O1CC2(COC1CCNc1ccccc1)COC(OC2)CCNc1ccccc1	39605	0	2.931	398.495
S([C@@H](\C=C\N[N-]C1=[NH+]N=C([C@@H](N1)c1ccccc1)c1ccccc1)C)c1ccccc1N	640639	1	3.925	442.579
Clc1cc(Cl)ccc1\C=N\NC(=O)C1CC1	72043	0	3.105	257.116
n1-2c(nnc1C)C=Cc1c-2cccc1	76484	0	1.918	183.209
[Pb+4]1(O[C-](O1)[C@H](NC(=O)c1ccccc1)CC(C)C)([C@H]1C=CC=C[CH-]1)([C@H]1C=CC=C[CH-]1)[C@H]1C=CC=C[CH-]1	628689	1	7.726	675.807
O1c2cc(C[C@@H]3N(C)C(=O)[C@@H](N(C)C(=O)[C@@H](NC(=O)[C@@H](N(C)C(=O)[C@@H](NC(=O)[C@@H](NC3=O)C)C)Cc3ccc(OC)cc3)C)[C@@H](O)c3ccc1cc3)ccc2O	227262	1	1.189	772.843
O=CC1=C[C@@H]2[C@H](CC(C2)(C)C)[C@@]2(C[C@]12C=O)C	299922	1	2.204	232.318
Oc1nc2c(cccc2)c(c1)C(=O)Nc1ccc(cc1)C#N	744269	0	2.977	289.288
S(C)c1ncnc2nc[nH]c12	20105	0	0.843	166.204
S(=O)(=O)(N(CCN(S(=O)(=O)c1ccc(cc1)C)C)C)c1ccc(cc1)C	20737	0	2.685	396.524
s1ccnc1NC(=O)CCC(=O)Nc1ccc(S(=O)(=O)N2CCOCC2)cc1	741235	0	-0.248	424.495
S=C(N1CCCC1)[N-]\N=C(/C)\c1[nH]c2ncccc2n1	674108	1	2.671	287.363
S(CC)C1=NC(=O)C(=CN1)C(OCC)=O	60266	0	0.967	228.268
ClC1=C(NC(=O)Cc2ccccc2F)C(=O)c2c(cccc2)C1=O	645210	1	2.855	343.736
Brc1c2c(cccc2)c(NC(=O)c2ccc3c(cccc3)c2O)cc1	601359	1	4.937	392.245
O(c1cc2[nH+]ccc(N[C@H](CCC[NH+](CC)CC)C)c2cc1)c1ccccc1	56655	1	4.092	379.538
[Ru+2]12(Cl)(Cl)(N3C=4C(C=CC=5C=4N1C=CC=5c1ccccc1)=C(C=C3)c1ccccc1)N1C=3C(C=CC=4C=3N2C=CC=4c2ccccc2)=C(C=C1)c1ccccc1	619184	1	7.898	836.771
S(C)c1[nH]c2c(n1)cccc2	21699	0	2.429	164.228
O(CC=C)c1nc(ncc1)-c1ccccc1	88811	0	2.81	212.247
O(C)c1c(OC)cc(cc1OC)\C(=C(/CC(=O)[O-])\C(OC(C)(C)C)=O)\c1cc(OC)c(OC)cc1	113059	0	2.631	487.519
Clc1ccc(Nc2nc(nc(n2)Nc2ccc(F)cc2)Nc2ccc(cc2)C(=O)\C=C\c2cc(OC)c(OC)c(OC)c2)cc1	743883	1	8.851	627.065
S(=O)(Cc1ccccc1)Cc1ccccc1	55	0	2.85	230.325
O1[C@H]([C@@H](O)[C@H](O)[C@H](O)[C@@H]1OC(=O)C)[C@H]1c2c(C(=O)c3c1cccc3O)c(O)cc(c2)CO	680719	1	0.146	446.404
O(C)c1cc2c([nH]cc2\C=C/2\c3c(NC\2=O)cccc3)cc1C	732190	1	3.494	304.343
O1c2c(C(=O)C(O)=C1c1ccc(O)cc1)c(OC)cc1OC(CCc12)(C)C	734926	1	3.437	368.38
O(C)c1cc(ccc1OC)C(=O)[O-]	7721	0	-0.048	181.165
O1[C@H](COCc2ccccc2)[C@H](OC12C=CC(=O)C=C2)COCc1ccccc1	720700	1	3.509	392.444
O(CC[NH+]1CCCC1)c1ccc(cc1OC)\C=C\1/C[C@H]2[C@H]3[C@H](CC[C@]2(C)[C@H]/1OC(=O)C)[C@@]1(C(C[C@@H]([NH+]2CCCC2)CC1)=CC3)C	728322	1	3.826	618.889
O(C)c1cc2c3n(-c4c(NC3=O)cc(OC)cc4)cc2cc1OC	747526	1	2.811	324.331
Clc1c2nc(cc(c2ccc1)C(=O)[O-])-c1ccc(Cl)cc1	39980	0	3.447	317.146
O\1c2c(ccc(OCC(=O)c3ccc([N+](=O)[O-])cc3)c2)C(=O)/C/1=C/c1cc(OC)c(OC)c(OC)c1	744997	0	4.221	491.446
Clc1ccc(cc1)C(=O)CSC=1NC(=O)C(=NN=1)\C=C\c1occc1	746136	0	3.999	373.813
OC[C@H](NC(=O)[C@H]1C=C2[C@H]([N@@H+](C1)C)Cc1c3c2cccc3[nH]c1)CC	186067	0	0.502	340.439
Fc1cccc(C(OC)=O)c1C(=O)c1c2c(ccc1)cccc2	60078	0	4.203	308.303
Oc1cc(N2CCN(CC2)c2cc(O)ccc2)ccc1	369981	0	3.137	270.326
Clc1ccccc1OCC(=O)Nc1scc(n1)-c1sccc1	744202	0	4.011	350.843
S1CCn2c1nc(-c1ccccc1)c2CO	332704	0	2.245	232.301
Clc1ccc(NC(=S)[S-])cc1	34229	0	4.085	202.704
O(CC)c1cc2c([n+](C)c(cc2)\C=C\c2cc(c3c(nccc3)c2O)C)cc1	86372	1	5.674	371.452
O1CC([N+](=O)[O-])(COC1c1ccccc1)CO	68481	0	0.976	239.225
O=C1N(c2ccccc2)C(=O)[C@@H]2[C@@H]1C[C@@H](c1c3c([nH]c12)cccc3)CCC(C)C	626381	1	5.519	386.486
S=C1Nc2c(cccc2)C(=O)NN1CCO	309890	0	1.11	237.278
O1c2cc(ccc2OC1)\C=N\NC(=O)c1ccc(cc1)C	61840	0	2.937	282.294
O1CC2=C(C=C3N(Cc4c3nc3c(cccc3)c4\C=N\NC(=O)[C@@H]([NH3+])C)C2=O)[C@@](O)(CC)C1=O	681636	1	-0.547	462.478
O=C(NCCC[C@@H](NC(=O)c1ccc(NCc2nc3c(nc(nc3N)N)nc2)cc1)C(=O)[O-])c1ccccc1C(=O)[O-]	623017	1	-2.109	571.544
Clc1cc(Cl)ccc1-c1nc(n(c1)-c1ccccc1)-c1ccccc1	745617	1	6.7	365.255
[Sn+4]12(O[C-]3C(O1)=CC=CC=C3)(O[C-]1C(O2)=CC=CC=C1)([C@H]1C=CC=C[CH-]1)[C@H]1C=CC=C[CH-]1	644925	1	5.359	517.16
Fc1ccc(cc1)C(=O)CCC[NH+]1CCN(CC1)c1ncccc1	170976	0	1.808	328.404
OCC[N@H+](CC\C=C(\CC\C=C(\CC\C=C(\C)/C)/C)/C)C	700514	1	3.659	294.495
[Sn]1(OC(=O)c2cc(ccc2O1)C)(CCCC)CCCC	633505	1	5.466	383.07
SCCN1C(=O)c2c(cccc2)C1=O	62328	0	1.294	207.249
O1c2c(cc3OCOc3c2)[C@@H]([C@@H](C)[C@H]1O)c1cccc(OC)c1OC	667898	1	3.213	344.358
Clc1ccc(S(=O)(=O)c2c3nc(C#N)c(nc3n(Cc3ccc(OC)cc3)c2N)C#N)cc1	730045	1	3.982	478.911
O=C/1Nc2c(N=C(C)\C\1=N/Nc1ccccc1)cccc2	749674	0	2.569	278.309
Oc1ccc(cc1)\C=C\C(OC[C@@]12CC[C@@]3([C@H](C1=CC[C@H]1[C@]2(CC[C@@H]2[C@@]1(CC[C@H](O)C2(C)C)C)C)[C@@H](C)[C@@H](CC3)C)C(=O)[O-])=O	640471	1	6.197	617.835
Clc1ccccc1CSc1ncnc2n(cnc12)CCCl	58906	1	3.965	339.243
O(C)c1c2[nH+]c3c(cccc3C(=O)NCC[NH+](C)C)c(N)c2ccc1	691240	1	0.651	340.419
O=C(CC(=O)c1cccnc1)c1c(cc(cc1C)C)C	17551	1	3.462	267.322
O1CC[NH+](CC1)C[C@H]1[C@@H]2CC[C@@H](C2)C1=O	87588	0	-0.623	210.293
FC(F)(F)C(O)(C\C(=N\Nc1ccc([N+](=O)[O-])cc1[N+](=O)[O-])\C)C(F)(F)F	659196	1	3.02	404.222
O=[N+]([O-])c1ccc(N2C(=Cn3c(nc4c3cccc4)C2=C)c2ccccc2)cc1	687523	1	4.816	380.399
O=C1C=C2CC[C@@H]3[C@@H]([C@]2(C=C1)C)C(=O)C[C@]1([C@H]3CC[C@@H]1C(=O)C)C	63543	0	2.625	326.429
O=C(\C(=C\c1ccc(cc1)\C=C(\C(=O)C)/C(=O)C)\C(=O)C)C	607320	1	1.607	298.333
ClC1=C(N2CC[NH+](CC2)CCOCCO)C(=O)c2c(C1=O)c(O)ccc2O	660637	1	-0.861	397.83
P(Oc1cc(C)c(N(C)C)c(c1)C)(OCC)(OCC)=O	132986	0	3.244	301.318
O(CC)c1nc(cc2c1C(=O)NC(C(=O)N\N=C\c1ccncc1)=C2[O-])-c1ccccc1	747283	0	1.086	428.42
O=C(N)Cc1c2c([nH]c1)cccc2	1969	0	1.16	174.199
Brc1cc(Br)cc2c1ncnc2N\N=C(/[C@H](O)[C@@H](O)[C@H](O)CO)\C=N\Nc1ncnc2c1cc(Br)cc2Br	716034	1	4.503	778.046
o1nc(C)c(C(=O)Nc2[nH]nc(C)c2-c2ccccc2)c1C	749527	0	1.866	296.324
Clc1cc(ccc1Cl)CNc1nc2c(nc1-c1ccccc1)c(N)cc(N)c2	728038	1	5.008	410.299
S=C(N(CC)CC)[N-]\N=C/1\c2c(NC\1=O)cccc2	668493	1	3.038	275.349
n1c-2c(Cc3c-2cccc3)cc2c1cccc2	150251	0	4.107	217.265
O(C)c1ccc(NC=O)cc1	26220	0	0.855	151.163
Clc1cc([N+](=O)[O-])c(cc1)C	5386	0	2.875	171.581
O=C([O-])c1c(N)c(ncc1C(=O)[O-])C	13331	0	-3.474	194.144
S1c2cc(ccc2Oc2c1cccc2)/C(=N/[N-]C(=S)N)/C	720190	1	4.12	314.405
O1C[C@@H]2[C@H](Cc3cc(O)c(O)cc3[C@H]2c2cc(O)c(O)cc2)C1=O	11870	0	2.521	328.316
O(CC[NH+]1CCCC1)c1ccc(cc1OC)\C=C\1/C[C@H]2[C@H]3[C@H](CC[C@]2(C)[C@H]/1O)[C@@]1(C(C[C@@H](O)CC1)=CC3)C	730476	1	3.869	522.739
O(C(=O)C(NC(=O)C)(CCC(=O)c1ccccc1)C(OCC)=O)CC	29456	0	1.622	349.378
Clc1cc(Cl)ccc1-n1nc(c2Cc3c(-c12)cccc3)C(=O)NCCC[NH+](CCCNC(=O)c1nn(c-2c1Cc1c-2cccc1)-c1ccc(Cl)cc1Cl)C	710415	1	8.473	800.582
O(C)c1c2c(c3c([n+](C)c2[O-])c2cc(OC)c(OC)cc2cc3)c(OC)cc1OC	645317	1	3.548	409.432
S=C(n1nc(nc1)N)Nc1ccccc1	104985	0	2.298	219.266
O=[N+]([O-])c1c2c([nH+]c3c(cccc3)c2NCCCn2ccnc2[N+](=O)[O-])ccc1	676514	1	3.571	393.376
O1CCN(CC1)C(=[NH2+])NC(=[NH2+])N	43840	0	-1.261	173.216
O1c2c(cccc2)C(=O)C(C(=O)c2ccc(O)cc2)=C1CCC	748013	0	4.004	308.328
Clc1cc(NCN2C(=O)c3c(cccc3)C2=O)ccc1C	132368	0	3.452	300.74
Clc1cc(ccc1Cl)\C=N\CCCCCCCCCCCCCCCC	43847	0	9.981	398.453
Clc1c(cc(Cl)cc1Cl)-c1n2N=C(CSc2nn1)c1ccc(OC)cc1	742066	1	5.696	425.719
Clc1ccccc1NC(=O)NCC(=O)[O-]	38436	0	-0.382	227.624
o1c(ccc1[N+](=O)[O-])\C=N\Nc1c([N+](=O)[O-])c(N\N=C\c2oc([N+](=O)[O-])cc2)c2NC(=O)Nc2c1[N+](=O)[O-]	715223	1	2.547	530.322
s1c2c(nc1O)cccc2	33823	0	2.213	151.186
o1c(ccc1[N+](=O)[O-])\C=C\1/C(=O)N(NC/1=O)c1ccc(cc1)C(OCC)=O	746131	0	1.87	371.301
F[C@@H]1[C@H](O)[C@H](O)[C@@H](O[C@@H]1O[C@H]1c2c(C[C@](O)(C1)C(=O)C)c(O)c1c(C(=O)c3c(cccc3)C1=O)c2O)C	659948	1	1.107	516.469
Clc1cc(Cl)c(Cl)cc1S(Cl)(=O)=O	26958	0	3.732	279.956
O=C(c1ccccc1)c1ccccc1	8077	0	3.234	182.218
O1c2cc(OC(=O)C)ccc2C=C(c2ccccc2)C1=O	17055	0	3.146	280.275
O1[C@@H](COC(=O)[C@@H](O)C)[C@@H](OC(=O)\C(=C\C)\C)C=CC1=O	740604	1	1.483	298.289
Brc1c([nH]c(Br)c1Br)-c1c(OC)c(Br)cc(Br)c1OC	641542	1	6.262	597.717
P(CCCCCCCC)(CCCCCCCC)CCCCCCCC	102529	0	10.437	370.635
Clc1ccc(S(=O)(=O)N2CC3=C(N(C=4N(CCN=4)C3=O)Cc3ccccc3C)CC2)cc1S(=O)(=O)N	281199	0	1.625	550.05
Oc1nc(nc2NC[C@H](N(c12)C=O)CNc1ccc(cc1)C(=O)N[C@@H](CCC(=O)[O-])C(=O)[O-])N	3590	0	-3.05	471.423
o1nc(cc1-c1ccccc1)-c1ccccc1	5565	0	4.04	221.254
Clc1cc2[n+]([O-])c(C#N)c([n+]([O-])c2cc1)NCCC[NH+](C)C	689727	1	-0.435	322.77
Fc1cc(ccc1NCc1nc2c(nc(nc2N)N)nc1)C(=O)N[C@H](CCC(=O)[O-])C(=O)[O-]	607301	1	-2.982	456.387
O(C(=O)c1ccccc1)Cc1ccccc1	8081	0	3.268	212.244
Clc1nc(nc2nc[nH]c12)N	29570	0	0.41	169.572
Clc1cc(C)c(Nc2nc(ccc2C(=O)N\N=C\c2ccc(Cl)cc2)C(F)(F)F)cc1	744612	1	6.807	467.271
S1CC(NC(=O)[C@H]1CCC)(C)C	17636	0	1.72	187.302
O=C([O-])c1cc(cnc1)C	82649	0	-0.679	136.128
O(C(=O)\C=C\C=C(\c1ccccc1)/c1ccccc1)C	113053	1	4.099	264.318
[NH3+]C1CC[NH+](CC1)Cc1ccccc1	73744	0	-1.519	192.301
P(Oc1cc(ccc1OC)\C=C/c1cc(OC)c(OC)c(OC)c1)(=O)([O-])[O-]	645645	1	1.077	394.312
O1c2c(C(=O)C(OC)=C1c1cc(O)c(OC)cc1)c(O)c(OC)c(OC)c2OC	642321	1	2.274	404.367
[n+]1(n-2c(cc1\C=C\c1ccccc1)/C(/c1c-2cccc1)=C\c1ccc(N(C)C)cc1)C	707773	1	6.661	404.526
Oc1c2c(C(=O)c3c(cc(cc3)CC[NH3+])C2=O)c(O)cc1	701754	1	0.746	284.287
O1C[C@H]2[C@@]34[C@H](CC[C@@H]([C@@H]3CC2=O)C(C4)(C)C)C1=O	284437	1	1.587	248.317
n1c2c(cccc2)c(cc1\C=C\c1ccc(N(CC)CC)cc1)-c1ccccc1	13487	0	6.809	378.509
[Re]123([P+](c4ccccc4)(c4ccccc4)c4ccccc4)([NH+]=O)(c4c1cc2[c-]34)[C@@-](O[Ge](c1ccccc1)(c1ccccc1)c1ccccc1)[O-]	621335	1	8.747	888.529
S(CC(=O)Nc1ccc(O)cc1)C(=O)N	13339	0	0.763	226.252
[nH]1nc(CC#N)c(C#N)c1N	22478	0	-0.128	147.137
s1c2c(nc1NC(=O)COc1cc(ccc1)\C=C\1/Oc3c(ccc(OC)c3)C/1=O)cccc2	743690	1	4.365	458.486
S(c1cc(ccc1)C(F)(F)F)c1cc2c(nc(nc2N)N)cc1	305782	1	4.015	336.335
o1cccc1CNC(=O)c1ccc(cc1)C(=O)NCc1occc1	116502	0	1.776	324.331
Oc1cc(CC)c([N+](=O)[O-])c(C)c1[N+](=O)[O-]	15984	0	2.805	226.186
O(C)c1ccc(cc1)C[C@H]1[NH2+]C[C@H](O)[C@H]1OC(=O)C	76712	1	-0.354	266.313
O1[C@H]2[C@]34[C@@H]([C@@H](OC(=O)[C@@](O)(CC)C)C1=O)[C@@H](C)[C@@H](O)[C@@](OC3)(O)[C@@H]4[C@@]1([C@@H](C2)C(=CC(=O)[C@H]1O)C)C	132791	1	0.145	494.531
O(C)c1c(OC)cc(cc1OC)-c1nn[nH]c1-c1cccnc1	749186	0	2.363	312.323
S(=O)(=O)(N)c1ccccc1C	2185	0	1.021	171.217
O1C[C@@H]2[C@@H](Cc3cc(OC)c(O)cc3[C@H]2c2cc(OC)c(O)cc2)C1=O	4586	0	2.972	356.369
Fc1c(cccc1F)C(=O)N1CCc2c([nH]c3c2cccc3)[C@H]1c1cc2OCOc2cc1	717553	1	5.171	432.419
O(C)c1c(OC)cc(cc1OC)C(=O)N1CCN(CC1)C(=O)c1cc(OCCCCOc2cc3N=C[C@H]4N(CCC4)C(=O)c3cc2OC)c(OC)cc1	744019	0	3.822	730.803
O=C1N(CC(=O)NC2(CCCC2)C(OCC)=O)C(=O)c2c1cccc2	78860	0	1.449	344.362
S(C[C@H]([NH3+])C(=O)[O-])C1(c2c(-c3c1cccc3)cccc2)c1ccc(OC)cc1	123532	0	1.411	391.483
O=[N+]([O-])c1cc2nc3-c4c5c(-c3nc2cc1)cccc5cc1c4cccc1	701023	1	5.069	349.342
Oc1cc([N+](=O)[O-])c(NC(=O)C)cc1	400387	0	0.602	196.16
O(C(=O)C([C@H](CC)C)C(OCC)=O)CC	30679	0	2.381	216.274
O(C(=O)C=1N=Nc2n(c3c(cccc3)c2C(OCC)=O)C=1N)CC	719734	1	2.069	328.323
Clc1cc2c(n(cc2-c2n[nH]c(c2)-c2c3cc(Cl)ccc3n(c2)C)C)cc1	740347	1	6.358	395.285
O=C(Nn1c(ccc1C)C)C[NH+](C(C)C)C(C)C	89514	0	0.487	252.376
O1[C@@H]2[C@@H](O[C@H](C2)[C@@]2(OCC[C@H](C)[C@@H]2O)O)\C=C\C(=C\[C@H](C[C@]2(O[C@H]([C@]34O[C@](CC3)(C[C@H](O4)[C@@H]3O[C@](CC3=O)(C)[C@@H](O)[C@@H]3O[C@@]4(O[C@H](CCC4)[C@H](C)C1=O)CC3)C)CC2)C)C)\C	668555	1	3.375	859.05
O(C)c1c(cccc1OC)\C=N\N1CCCCCC1	82284	0	2.904	262.347
O(c1cc(ccc1)\C=C\1/c2c(NC/1=O)cccc2)c1ccc(OC)cc1	724350	1	4.274	343.375
O=C1N(c2n(nnc2-c2ccccc2)-c2c1n(c1c2cccc1)C)CC(OCC)=O	742125	0	3.667	401.418
Clc1cc(Cl)c(F)cc1-c1n2N=C(Sc2nn1)COc1ccc(Cl)cc1	741325	0	5.412	429.683
n1c(nc(nc1N)N)-c1ccccc1-c1nc(nc(n1)N)N	4429	0	0.398	296.291
Clc1cc(Cl)c([N+](=O)[O-])cc1-c1nc2SC(C)=C(n2c1\C=N\[N-]C(=[NH2+])N)C	722877	1	3.362	426.28
S(C)C1=CC=C2c3c(cc(OC)c(OC)c3OC)CC[C@@H]([NH2+]Cc3ccccc3[N+](=O)[O-])C2=CC1=O	648790	1	3.259	509.594
Clc1cccc(N=C=S)c1C	134676	0	3.739	183.658
O=C1NC(=O)NC(=O)C12CCC=C[C@H]2C	120193	0	0.636	208.214
S=C1NC(=O)C(CC=C)(CC)C(=O)N1	120730	0	1.709	212.269
O(CCCCCCCCCCN1C(=O)c2c3c(cccc3ccc2)C1=O)c1cc2N=C[C@H]3N(CCC3)C(=O)c2cc1OC	719122	1	6.287	581.701
O1[C@H](C)[C@@H](O)[C@@H]([NH3+])C[C@@H]1O[C@@H]1c2c(C[C@](O)(C1)C(=O)COC(=O)CCCCCCC)c(O)c1c(C(=O)c3c(cccc3OC)C1=O)c2O	149584	1	2.278	670.723
S(=O)(=O)(CC#CCS(=O)(=O)c1ccccc1)c1ccccc1	713368	1	3.121	334.41
O=C([O-])c1cc(cc(C)c1N)C	90444	0	0.211	164.181
S1SC=2SCCN(C=2C1=S)C(C)C	741892	0	3.442	249.44
O(C)c1cc(ccc1OC)Cc1[nH]c2c(n1)N(C)C(=O)N(C)C2=O	74357	0	1.621	330.339
O1C2=C(C(C3=C1CC(CC3=O)(C)C)C[C@@H](c1ccc(O)c(O)c1O)c1ccccc1)C(=O)CC(C2)(C)C	663611	1	5.186	502.598
[NH2+]=C(N(c1ccccc1)c1ccccc1)Nc1ccccc1	58954	0	4.256	288.366
O=[N+]([O-])c1c2c([nH+]c3c(cccc3)c2NCCC[N+]2([O-])CCCCC2)ccc1	667645	1	3.642	381.448
Clc1ccc(NC(=S)[N-]NC(=O)C23CC4CC(C2)CC(C3)C4)cc1	665948	1	5.321	362.897
O(C)c1c(OC)cc(cc1OC)\C=C\c1ccc(OCCC)cc1	638403	1	4.623	328.402
O1C=2C=3C(=C4C(N(C=3)C)=C3[C@H](C=C5OCOC5=C3)C=C4)C=CC=2OC1	35607	1	0.527	333.337
O=C(N\N=C\C=C\c1ccccc1)CCCC(=O)N\N=C\C=C\c1ccccc1	106120	0	3.264	388.462
S(=O)(=O)(N1C(=CC(=C(C#N)C1=O)c1n(ccc1)C)c1cc(OC)c(OC)cc1)c1ccc(cc1)C	746910	0	4.144	489.543
O=C1N[C@H](CC(C)C)C([O-])=C1/C(=N/c1ccccc1)/C	100425	0	1.636	271.334
Clc1ccc(-n2nc(c3CCc4cc(OC)ccc4-c23)C(=O)NCC[NH+](CC)CC)cc1	288010	1	4.027	453.984
O[C@@H]([C@@H](O)[C@@H]([NH+]1CCCCC1)c1ccccc1)c1ccccc1	60620	0	1.85	312.426
O1[C@@H]2[C@@H]3[C@@H]4C(=CC1)C[N@@+]1([O-])[C@H]([C@@]5([C@H]3N(c3c5cccc3)C(=O)C2)CC1)C4	24951	0	0.338	350.411
Clc1cc(N)c(OC)cc1	6114	0	1.731	157.597
O1[C@@H](C)[C@H](OC)[C@](OC)(C)[C@@H](OC)[C@H]1O[C@H]1C[C@](O)(C)[C@@H](c2c1cc1c(c2)C(=O)c2c(C1=O)c(O)cc1c2O[C@H]2O[C@]1(C)[C@@H](O)[C@H]([N+]([O-])(C)C)[C@@H]2O)C(OC)=O	116555	1	0.135	787.803
Clc1cc\2c(Sc3c(cccc3)/C/2=C/CC[NH+]2CC[NH+](CC2)CCO)cc1	78203	1	1.42	402.981
Oc1c2c(C(=O)c3c(C2=O)c(NCC[NH3+])ccc3NCC[NH3+])c(O)cc1	645017	1	-1.726	358.392
O=C(N(c1ccccc1C)c1ccccc1C)C	61891	0	3.705	239.312
O1[C@H](C)[C@@H](O)[C@@H](O)C[C@@H]1O[C@@H]1c2c(C[C@](O)(C1)C(=O)C)c(O)c1c(C(=O)c3c(cccc3OC)C1=O)c2O	284682	1	0.917	528.505
O=C1N(C)C2(CCCC2)C(N)=C1/C(=N/O)/N	743257	0	-0.962	224.26
Brc1cc2OC(=O)Nc2cc1Cl	24970	0	2.753	248.461
Oc1c2c(cccc2)c(N=Nc2ccc([N+](=O)[O-])cc2)cc1	5048	1	4.76	293.277
O=C1N(C(=O)NCNC(=O)N2C(=O)C=CC2=O)C(=O)C=C1	19633	0	-1.016	292.204
N=C1N(C(C)(C)C)C(CC)=C(C=C1C#N)C	747810	0	2.19	217.31
[NH+]1(CCCCC1)Cc1c2c([nH]c1C)cccc2	100229	0	1.699	229.341
O1C2=Nc3cc([N+](=O)[O-])ccc3NC2=C(O)[C@H]1c1ccccc1OC	372287	0	2.437	339.302
S1c2c(c(NCC[NH+](CC)CC)c(OC)cc2C)C(=O)c2c1cccc2	302334	1	3.076	371.516
OC1=C[C@@H]2C(=CC[C@@H]3[C@@]2(C)C(=O)C[C@]2(C)[C@@H]([C@@](O)(C(=O)\C=C\C(O)(C)C)C)[C@H](O)C[C@]23C)C(C)(C)C1=O	521777	1	2.16	514.65
n1c2cc(N)ccc2cc2c1cc(N)cc2	689004	1	1.86	209.247
O=C(N(c1ccccc1)c1ccccc1)N1C=Cc2c(cccc2)[C@H]1C#N	85178	1	4.072	351.401
O=C([O-])c1cc(ccc1)Cc1cc(ccc1)C(=O)[O-]	16069	0	0.116	254.237
Br/C(/Cl)=C(\Cl)/C(/[N+](=O)[O-])=C(\Cl)/SCc1ccccc1	678032	1	4.907	403.507
Clc1ccccc1\C=N\NC(=O)CCCC(=O)N\N=C\c1ccccc1Cl	106122	0	3.872	405.278
S=C1NC(=O)C(C(C)=C)(CCCC)C(=O)N1	120856	0	2.611	240.322
O[C@@H](C(c1ccc(N(C)C)cc1)c1ccc(N(C)C)cc1)c1ccccc1	35487	0	4.834	360.492
O=C([O-])C1(NC(=O)C)CCCC1	22847	0	-1.148	170.186
Clc1ccc(cc1)-c1nc-2c(CC(=S)Nc3c-2cccc3)c(c1)-c1ccccc1	682771	1	7.117	412.934
n1nn[n-]c1N(CCCC)CCCC	11126	0	2.137	196.273
Brc1cc(cc(Br)c1O)CCNC1=CC(=O)c2c(nccc2)C1=O	668394	1	3.43	452.097
O1C2=Nc3cc(C)c(cc3NC2=C(O)[C@H]1c1cc(O)ccc1)C	372499	0	3.289	308.331
O=C1NC(=O)N=C2N(c3cc(C)c(cc3N=C12)C)CC=O	23445	0	1.32	284.27
S1CC(=O)N(NC(=O)c2ccc(nc2)C)[C@H]1c1cc(OC)c(OC)c(OC)c1	745077	0	1.579	403.452
S=C1NC(=O)C=2N=C(C)C(=O)NC=2N1	67305	0	-0.529	210.213
Clc1ccc(cc1)C(=O)NNC(=O)c1ccc(Cl)cc1	60385	0	3.2	309.147
[Si](O[C@H](C(OCOCCOC)(C)C)CCO)(C(C)(C)C)(c1ccccc1)c1ccccc1	617388	1	6.376	460.678
O(C)c1cc2c(nc(cc2)C)cc1	15557	0	2.282	173.211
O1[C@H](CO)[C@H](OC)[C@@H](O)[C@H](O)[C@@H]1n1c2c(c3c(c4c5c([nH]c24)cccc5)C(=O)NC3=O)c2c1cccc2	726576	1	2.102	501.487
Clc1nc2c(nc1NCc1ccccc1)nc(nc2N1CCCC1)N1CC[NH+](CC1)CC(=O)N	717855	1	1.612	482.989
[O-][N@@H+](c1ccccc1)[CH-]\C=C\c1ccccc1	152376	0	3.553	224.278
O=C1NC(=NC(=O)[C@H]1c1ccccc1)N	57728	0	0.502	203.197
O=C1N(CCc2ccccc2)C(=O)CC(C1)C	38763	0	2.026	231.29
O(C(=O)c1ccccc1C(=O)[O-])[C@H]1[C@H]2[C@H](CCC1)CCC2	108267	0	2.355	287.33
O1c2c(OC1)cc1[C@@H]3[C@@H](NC(=O)c1c2O)[C@H](O)[C@H](O)[C@@H](O)[C@@H]3OCC(=O)C[C@@H](O)C	708495	1	-1.974	425.387
O=C1NNC(=O)c2nc3c(nc12)cccc3	172773	0	0.362	214.18
o1cccc1CO	8843	0	0.407	98.0999
ClCC[NH+]1CCSCC1	55880	0	-0.144	166.692
S(=O)(=O)(\C(=C\c1c2c([nH]c1-c1ccccc1)cccc2)\C(=O)C)C	748875	1	3.361	339.408
O1CCC[C@H]1C[C@@H](O)C[C@@H](O)C	17491	0	-0.008	174.237
O=C1N(C(=O)C=C1)c1cc([N+](=O)[O-])c(N(C)C)c([N+](=O)[O-])c1	90450	0	1.339	306.231
S=C1N=C(N)c2[nH]cnc2N1	5932	0	0.708	167.192
BrCC(=O)NC[C@@H]1O[C@@H](N2C=C(C)C(=O)NC2=O)C[C@H]1O	334043	1	-0.829	362.177
O=C(\C=C\c1ccccc1)c1ccc([N+](=O)[O-])cc1	3322	0	3.596	253.253
Clc1cc2[nH+]c3c(cc(OC)cc3)c(NCCC[NH+](CCCl)CCCl)c2cc1	17273	1	4.055	442.81
Clc1cccc(Cl)c1\C=C\C(=O)C(C[NH+]1CCCCC1)(C)C	669737	1	3.847	341.295
Nc1ccc(cc1C)\C(=C\1/C=C(C)C(=N)C=C/1)\c1cc(C)c(N)cc1	9858	1	4.217	329.438
P(OC[C@@H]1O[C@@H](N2C=CC(=NC2=O)NCCCCCCCCCCCCCCCCCC)[C@@H](O)[C@@H]1O)(OC[C@@H]1O[C@@H](N2C=C(C)C(=O)NC2=O)C[C@@H]1F)(=O)[O-]	701598	1	4.079	800.871
[NH3+]C1CCN(CC1)c1nc2c(c3c1CCCC3)cccc2	710333	1	2.369	282.403
O(O)C(=O)c1ccccc1C(=O)[O-]	240744	0	-0.539	181.122
Clc1cc(Nc2ccc(OC)nc2)c(cc1)C(=O)[O-]	60303	0	1.572	277.683
Clc1ccc(cc1)\C=C\1/C[NH2+]C\C(=C/c2ccc(Cl)cc2)\C/1=O	685124	1	3.469	345.242
Fc1ccc(Oc2cc3c(N=CN([C@@H](C)c4ccccc4)C3=O)cc2NC(=O)C=C)cc1	747177	1	4.501	429.443
Clc1cc2[nH+]c3c(cc(OC)cc3)c(N[C@H](CCC[NH+](CCCl)CCCl)C)c2cc1	3424	1	5.013	470.863
O=C1NC(=O)N(C)C(C)=C1Cc1ccccc1	38357	0	1.642	230.262
Clc1c2c([nH+]c3c(cccc3)c2Nc2ccc(S(=O)(=O)Nc3nc(cc(n3)C)C)cc2)c(cc1)C(=O)Nc1ccc(S(=O)(=O)Nc2nc(cc(n2)C)C)cc1	633021	1	6.217	795.309
O(CC(=O)c1ccccc1)c1ccccc1	7586	0	3.069	212.244
ClP(=O)(N1CCOC1=O)N1CCOC1=O	377647	0	0.168	254.565
ClC(Cl)C(=O)N1CC2CCC(CC2)C1	88998	0	2.415	236.138
O=C1c2c(C(=O)c3c1cccc3)c(NC[C@@H](O)C[NH2+]CCC)ccc2NC[C@@H](O)C[NH2+]CCC	673349	1	-0.107	470.604
o1c2[nH+]c3c(cccc3)c(Nc3cc(ccc3)/C(=N/O)/C)c2cc1	720556	1	3.967	318.349
Clc1ncnc2n(cnc12)[C@@H]1O[C@H](CO)[C@H](O)C1	90251	0	-0.033	270.672
Brc1cc\2c(NC(=O)/C/2=N\NC(=O)CSC2=Nc3c(cccc3)C(=O)N2c2ccccc2)cc1	697654	1	4.347	534.385
Clc1ccc(Nc2nc(nc(n2)Nc2ccc(Cl)cc2)Nc2ccc(cc2)-c2nc(N)c(C#N)c(c2)-c2ccccc2)cc1	743851	1	9.473	616.502
S(=O)(=O)(N1Cn2nc(C(OC)=O)c(c2C[C@H]1c1ccccc1)C(OC)=O)c1ccccc1	746991	0	3.059	455.484
O=C1Nc2c(-c3nc(cc(c3C1)-c1ccccc1)-c1cc3c(cc1)cccc3)cccc2	682768	1	5.989	412.482
o1cccc1CNc1nc(nc2[nH]ncc12)C	4066	0	0.963	229.238
OCCN(CCO)c1ccc(N=Nc2ccc(N=NN(C)C)cc2)cc1	115224	0	3.666	356.422
O1[C@@H](CO)[C@H](O)[C@H](O)[C@H]1n1c2ncnc(N)c2c(C#N)c1OCC	289117	1	-0.767	335.315
O=C1NC(=O)N[C@@]1(CC)C1CCCC1	68601	0	1.543	196.246
OCCN(CCO)c1ccccc1	6327	0	0.913	181.232
Brc1cc(ccc1C)CCC	8070	0	4.463	213.114
O=C1NC(=O)N(N=C1C(=O)NC)C	56914	0	-1.355	184.153
O=[N+]([O-])c1c2c([nH+]c3c(cccc3)c2NCCC[NH3+])ccc1	662193	1	1.559	298.34
O=C1c2c(cccc2)C(=O)C([O-])=C1CCCc1ccc(cc1)C1CCCC1	742232	1	5.099	359.438
O1[C@]23[C@H]([C@@H]4CC[C@@](O)(C)[C@]4(C[C@H]12)C)CCC1=CC(=O)CC[C@@]13C	3362	0	2.464	316.435
Clc1c2c(nc(nc2N)N)ccc1CNc1ccc(cc1)C(=O)N[C@H](CC(=O)[O-])C(=O)[O-]	529861	1	-1.382	456.839
S(c1n(cnc1[N+](=O)[O-])C)c1oc2c(n1)cccc2	631136	1	2.666	276.271
Brc1cc(ccc1)C(=O)NNC(=O)c1c2c(ccc1)cccc2	88170	0	3.528	369.212
O1c2c(C[C@@H]1C(C)C)c1O[C@H]3[C@H](c4cc(OC)c(OC)cc4OC3)C(=O)c1cc2	53866	1	4.059	396.433
O1[C@H](COC(=O)C)[C@H](O)[C@H](O)[C@H](O)[C@H]1O[C@@H]1C[C@@H]2[C@@]([C@H]3CC[C@@]4(C(=CC[C@H]4[C@H](C[C@@H](O)[C@@H](O)C(OC)(C)C)C)[C@]13C)C)(CC[C@H](OC(=O)C)C2(C)C)C	663008	1	3.208	752.971
O(C)c1c(NC(=O)c2cc(NC(=O)\C=C\c3ccccc3)c(OC)c(OC)c2)cc(cc1OC)C(=O)NCCC	718306	1	3.882	547.599
s1cccc1[C@@](O)(Cc1cccnc1)C	42654	0	2.166	219.303
[Sn]1(SCC(O1)=O)(CCCC)CCCC	67015	1	3.813	323.04
ClC1(Cl)C(=C(C1=O)c1ccccc1)c1ccccc1	678502	1	4.388	289.156
O=C1n2c(nc3c2cccc3)-c2c1cccc2	252777	0	3.094	220.226
OCCN(CCO)c1ccc(N=Nc2ccc([N+](=O)[O-])cc2)cc1	364364	0	3.177	330.339
o1ncc2CCc3c(-c12)c(n(C)c3C(OCC)=O)C	748256	0	2.635	260.288
[Se]([C@H]1[C@@H](N(O[Si](C(C)(C)C)(C)C)C)[C@H](O[C@@H]1N1C=C(C)C(=O)NC1=O)CO[Si](C(C)(C)C)(C)C)c1ccccc1	674469	1	8.195	654.847
S1C(Nc2cc(ccc2)C)=C(C#N)C(=O)NC12CCCC2	319436	0	3.248	299.391
O1CC(=CC1=O)[C@H]1CC[C@]2(O)[C@H]3[C@H](CC[C@]12C)[C@@]1([C@H](C[C@@H](O[C@@H]2O[C@@H](C[C@@H](O)C2=O)C)[C@H](O)C1)CC3)C=O	143925	1	1.577	532.622
O=C1NC=C2C(=N1)c1c(CC2)cn(c1)-c1ccccc1	748047	0	2.882	263.294
Oc1ccc(NC(=O)Nc2ccc(O)cc2)cc1	77019	0	2.038	244.246
O(C)c1c(OC)cc(cc1OC)[C@H]1NN=C(C1)c1[n+]([O-])c2c([n+]([O-])c1C)cccc2	744173	0	1.322	410.423
Clc1cc(Cl)c([N+](=O)[O-])cc1-c1nc2SC(=Cn2c1\C=N\[N-]C(=[NH2+])N)CCC	723550	1	4.202	440.307
S1C=Cn2c1nc(-c1ccccc1)c2\C=C\1/c2c(NC/1=O)cccc2	726900	1	3.578	343.402
O1[C@H](C(=O)[C@]2(O)[C@@H](C)[C@H](O)[C@@]34O[C@]3([C@H]2O)[C@H](O)c2c(cccc2O)C4=O)[C@H]1C	65380	1	-1.374	392.357
Br[C@H](C(=O)c1ccccc1)C	89689	0	2.731	213.071
Clc1ccc(cc1)-c1n2N=C(CSc2nn1)c1oc([N+](=O)[O-])cc1	629974	1	3.798	361.763
OCC(N1CC(N=C1CCCCCCCCCCC)(C)C)(C)C	17761	1	5.057	324.544
O=C(NCC[NH+](C)C)c1c2nc(c3c(c2ccc1)cccc3)-c1cccnc1	617951	1	1.507	371.455
O(CC)c1ccc(NC(=O)[C@@H](O)C)cc1	72105	0	1.094	209.242
O(\C(=C/C(=O)C)\CC(C)C)C(=O)c1ccccc1	15290	0	3.161	246.302
n1c(nc2n(ncc2c1Nc1ccccc1C)C)C	1642	0	2.631	253.302
O1[C@@H]2O[C@H](C[NH3+])[C@]1(CC[C@@H]2C)C	15914	0	-0.527	172.245
O1C[C@H]2[C@@H]([C@@H](c3c(cc4OCOc4c3)[C@H]2OC(=O)c2ccccc2)c2cc(OC)c(O)c(OC)c2)C1=O	642294	1	3.929	504.485
S(c1cc(C(C)(C)C)c(O)cc1C)c1cc(C(C)(C)C)c(O)cc1C	35388	1	7.237	358.537
O(C)c1ccc(cc1)CN(N=O)c1ccc(cc1)C(=O)[O-]	143719	0	1.39	285.275
Brc1sc(Br)c2c1C(=O)[C@@H](O)[C@H]2NC(=O)[C@H](NC(Oc1ccccc1)=O)C(C)C	662122	1	3.412	546.23
O=CNc1cc2Cc3cc([N+](=O)[O-])ccc3-c2cc1	18460	1	2.428	254.241
S1S(=O)[C@]2(CC(=O)N[C@@H](c3scc(n3)\C=C\C=C\C(=O)[C@H](O)\C=C(\CC2)/C)C)[C@](O)(C)C1=O	645777	1	2.127	510.647
ClC[C@H]1c2c(N(S(=O)(=O)c3oc4c(cc(OC)cc4)c3)C1)cc([N+](=O)[O-])cc2	696992	1	3.208	422.84
Clc1ccc(cc1)C1=NN=C2N(C1)c1c(N=C2c2ccccc2)cccc1	709519	1	4.95	370.834
Clc1cc(\[NH+]=C\Nc2ccc(cc2)-c2sc3c(n2)cccc3)ccc1	730302	1	5.278	364.871
s1c2c(nc1Sc1cc(nc3c1cc(OC)cc3)C)cccc2	13380	1	5.026	338.447
O(c1ccc([N+](=O)[O-])cc1)c1ccccc1	5420	0	3.284	215.205
Oc1c2c(c(N)ccc2N)c(O)c2c1cccc2	3393	0	1.669	240.257
N#CCc1cc(C)c(cc1)C	26232	0	2.716	145.201
O(C(=O)NCC)[C@@H]1CC2=CC[C@H]3[C@@H]4CC\C(=N/OC(=O)NCC)\[C@]4(CC[C@@H]3[C@]2(CC1)C)C	629227	1	4.297	445.595
O=C1C(=C([O-])C(=O)C(=C1[O-])c1ccc(cc1)CC)c1ccc(cc1)CC	114126	1	3.048	346.376
ClCCCCN(P(OCc1oc([N+](=O)[O-])cc1)(OC[C@@H]1O[C@@H](N2C=C(C)C(=O)NC2=O)C=C1)=O)C	721390	1	1.328	532.869
Clc1cc(Cl)ccc1OP(SC(=S)OC[NH+](C)C)(SC(=S)OC[NH+](C)C)=O	19709	0	4.003	511.467
Oc1ccc(cc1)\C=C\1/CCCc2c/1nc1c(cccc1)c2C(=O)[O-]	744140	0	3.361	330.357
S(C)C1=CC=C2c3c(cc(OC)c(OC)c3OC)CC[C@@H]([NH2+]Cc3ccc(F)cc3)C2=CC1=O	648789	1	3.57	482.587
n12c(nc3cc(ccc13)C)-c1c(N=C2c2ccccc2N)cccc1	128760	0	4.404	324.379
S1CC(=O)N(\N=C\c2cc(OCc3ccccc3)ccc2)C1=S	124811	0	4.362	342.435
ClCCN(P1(OCC[C@H]2N1CCCC2)=O)CCCl	68116	0	1.296	315.176
O1CC[NH+](CC1)CCCN1C2=C(c3c(cccc3)C1=O)C(=O)c1cc(OC)ccc12	740646	1	0.527	405.466
[nH]1c2c(nc1N\N=C(/Cc1ccccc1)\c1ncccc1)cccc2	720194	1	4.463	327.382
O=C1N[C@H](CC(C)=C1C#N)C	351097	0	0.725	150.178
Oc1c2c(ccc1)C(=O)C(=CC2=O)C	236613	1	1.962	188.179
O=C(C)[C@H]1N=NC[C@@H]1c1ccccc1	55840	0	2.125	188.226
S=C1N[C@@H]2CCC[C@H](C1)C2	112769	0	1.96	155.261
o1c2cc(C(=O)Nc3cc(OC)ccc3OC)c(O)cc2c2c1cccc2	50650	0	3.843	363.363
n1-2nnnc1C=Cc1c-2cccc1	52226	0	0.957	170.171
O(C)C1=Nc2c(N3C1=NCC3)cccc2	408224	0	1.243	201.225
O=C(C)c1cc2c(c3CCCCc3cc2C)cc1	27921	0	4.477	238.324
O=C1C2=C(N(CCC[NH2+]CC[NH2+]CCCN3C4=C(c5c(cccc5)C3=O)C(=O)c3c4cccc3)C(=O)c3c2cccc3)c2c1cccc2	726767	1	1.118	636.738
O=C(n1cc(nc1)CC[NH+](CCC[NH3+])CCC[NH3+])c1ccccc1	704225	1	-3.196	332.464
O[C@@H]1CC2=CC[C@H]3[C@@H]4CC=C([C@]4(CC[C@@H]3[C@]2(CC1)C)C)c1cccnc1	749226	1	4.223	349.509
Clc1ccccc1C(=O)c1cc(Cl)ccc1N[C@H]1[C@@H]2[C@@H]([C@@H](c3c1cc1OCOc1c3)c1cc(OC)c(OC)c(OC)c1)C(OC2)=O	681712	1	6.841	662.513
Clc1nc(nc(Cl)n1)-c1ccccc1	51871	0	3.276	226.062
O=C/1N(C(=N\C\1=C/c1ccc(N(C)C)cc1)c1ccccc1)c1cc(ccc1N1C(=N\C(=C/c2ccc(N(C)C)cc2)\C1=O)c1ccccc1)C(=O)c1ccccc1	711890	1	8.794	760.88
Clc1cc([N+](=O)[O-])cc2c1[nH]c1c2cc([N+](=O)[O-])cc1Cl	15886	1	4.44	326.092
Clc1cc2c(NC(=O)C2=O)cc1	135811	0	1.334	181.576
n1c2c(cc(cc2)C)c(cc1C)C	73479	0	3.271	171.238
[Sb+3]12([Br+][Sb+3]3(Br)(S[C@-](S1)N1CCOCC1)S[C@@-](S3)N1CCOCC1)(Br)S[C@@-](S2)N1CCOCC1	625498	1	2.65	976.039
ClCCN(CCCl)c1ccc(cc1)C[NH2+]CCC[NH2+]Cc1ccc(N(CCCl)CCCl)cc1	103508	1	3.14	536.408
O(C)c1cc2C3=NCCN(c4c3c3n(-c2cc1)cnc3cc4)CC[NH+](CC)CC	658360	1	2.337	390.501
O1c2c(cc3OCOc3c2)[C@@H]([C@@H](C)[C@H]1NNc1ccccc1)c1cc(OC)c(O)c(OC)c1	671173	1	4.641	450.484
Clc1ccccc1NCN1c2c(SC1=S)cccc2	86147	0	5.727	306.834
S(=O)(=O)(Nc1cccnc1)c1cccnc1	5557	0	0.016	235.262
O(C)c1ccc(cc1)-c1c2c(nc3c1CCC[C@@H]3C)ncnc2N	747510	0	3.71	320.388
Clc1cc(Cl)ccc1\C=N\N1C(=O)CSC1=S	121967	0	4.124	305.203
ClC1=C(Nc2ccc(cc2)C(=O)NCCc2cc(OC)c(OC)cc2)C(=O)N(Cc2ccccc2)C1=O	732832	1	3.933	519.976
S=C(Nc1ccc(F)cc1)[N-]\N=C(/C)\c1ccccc1	748691	0	4.764	286.347
O1CC[NH+](CC1)CC#CC#CC[NH+]1CCOCC1	60040	0	-2.107	250.337
C1[C@H](C=C)[C@@H](CC[C@H]1C=C)C=C	78467	0	3.689	162.271
ClC1=C(Nc2ccc(cc2)C(=O)Nc2cc(Cl)c(cc2)C)C(=O)N(Cc2ccccc2)C1=O	732839	1	4.788	480.343
[NH+](C[C@@]1(C)[C@@H](CCCCC)C(=CC(C)=C1C)C)(C)C	31938	0	3.748	264.469
Clc1ccc(nc1)\N=C\c1ccccc1O	270330	0	3.237	232.666
Br[C@@H]1CC2=C(OC1(C)C)c1c(cccc1)C(=O)C2=O	98916	1	2.891	321.166
s1c(cnc1NC(=O)[C@H](NC(=O)c1ccccc1)Cc1ccccc1)C	744152	1	2.857	365.449
Oc1ccccc1C(OCC)=O	8209	0	1.792	166.174
s1cc(cc1)[C@@]1(NC(=O)NC1=O)C(C)C	109411	0	1.375	224.279
O1CC([N+](=O)[O-])(COC1c1ccc(cc1)C)CC	26411	0	2.874	251.278
Clc1ccc(cc1[N+](=O)[O-])-c1nc2SC(=Cn2c1\C=N\Nc1ncccc1)C	730328	1	4.388	412.853
[Sn+4]1(Cl)(Cl)(N2C=3C(C=CC=4C=3N1C=CC=4)=CC=C2)([C@H]1C=CC(F)=C[CH-]1)[C@H]1C=CC(F)=C[CH-]1	608465	1	4.743	562.026
S(=O)(=O)([O-])C[C@@H](O)C[NH+](CCO)CCO	378145	0	-5.671	243.278
ClC1=C(Nc2cc(ccc2)C(F)(F)F)C(=O)N(Cc2ccc(Cl)cc2)C1=O	727972	1	4.46	415.193
O1c2c(ccc(OC)c2)C(=C(Oc2ccccc2)C1=O)c1ccc(OCC[NH+](C)C)cc1	699451	1	3.188	432.488
S\1c2scc([n+]2C(=O)/C/1=C/c1ccccc1OC)-c1cc([N+](=O)[O-])ccc1	657446	1	4.858	397.448
P1(OCC([N+](=O)[O-])(CO1)C)(=O)Nc1ccccc1OC	114610	0	0.91	302.22
Brc1ccc(Nc2nc(nc(N)c2\C=N\c2ccc(Br)cc2)N)cc1	103520	1	4.8	462.141
S1N(C)C(=S)c2c1cccc2	158036	1	2.603	181.278
Brc1cc2[nH]cc(c2cc1)C(=O)c1[nH]c(cn1)-c1c2c([nH]c1)cccc2	712185	1	4.673	405.247
Cl\C(=C/C=C(/C#N)\C#N)\c1ccc(cc1)C	723645	1	3.338	228.677
Clc1cc2nc[nH]c2cc1	3059	0	2.009	152.581
S=C(N)[N-]\N=C/1\CCCCCCCCC\1	103741	0	3.841	226.362
O=C(Nc1ccccc1N)C	16117	0	0.203	150.178
n1c(cc(nc1N)N)C	23614	0	-0.1	124.144
S1CC(=O)N(NC(=O)c2ccc(nc2)C)[C@H]1c1cc(OC)ccc1	745074	0	1.611	343.4
P(OC)(OC)c1ccc(cc1)C	164966	0	2.061	184.172
P(OCC)(OCC)(=O)NC	30699	0	-0.115	167.143
O=C1C=C(C)/C(=N/O)/C=C1C	131646	0	1.648	151.163
Clc1cc(ccc1N=N[C@@H](C(=O)C)C(=O)Nc1ccc(cc1C)C)-c1cc(Cl)c(N=N[C@H](C(=O)C)C(=O)Nc2ccc(cc2C)C)cc1	5336	0	9.341	685.599
OC=1NC(=O)C(N=Nc2ccccc2)=C(C=1)C(OCC)=O	39086	0	2.353	287.271
S=C(NC1(CCCCC1)C#C)Nc1ccc(cc1)C	201600	0	5.905	272.408
O1c2c(OC1)cc1c(c2)C(=O)C2=C1N(CCC[NH+](C)C)C(=O)c1cc(OC)c(OC)cc12	724058	1	0.591	437.465
O=C1NC(=O)NC(=O)C12CCN(CC2)c1ccccc1	115582	0	1.001	273.287
O(C(=O)CC[C@H](NC(=O)c1ccc(N2CCN(CC2)c2c(nc(nc2N)N)C)cc1)C(OCC)=O)CC	691519	1	1.717	513.589
Clc1ccc(SC[NH+]2CCCCC2)cc1	57928	0	2.513	242.788
S(C)C=1NC(=O)c2nc([nH]c2N=1)C1=Cc2c(NC1=O)cccc2	749042	0	1.778	325.345
P(OCc1nnn(c1)CCCC(=O)[O-])(OCc1nnn(c1)CCCC(=O)[O-])(=O)C(c1ccccc1)(c1ccccc1)c1ccccc1	742479	0	1.246	656.625
O=C1C(=C(C2=CC(=O)C(C)=C(C)C2=O)C(=O)C(C)=C1C)C1=CC(=O)C(C)=C(C)C1=O	698090	1	3.959	404.412
O=C(\C(=C/c1ccccc1)\C[NH+]1CCCCC1)c1ccccc1	109154	1	3.092	306.421
O=C1c2c(nccc2)-c2ncc(c3c2c1nc1c3cccc1)COC(=O)C	694488	1	2.776	355.346
O1C2=CC(=O)C(N)=CC2=Nc2c1cccc2	94945	1	0.762	212.204
S(\C(=N/C#N)\NCC=C)C	331198	0	1.384	155.221
Clc1sc(Cl)c2c1C(=O)C[C@@H]2Nc1ccccc1	704121	1	3.505	298.188
Clc1ccc(cc1)C=1Nc2ncc(cc2C(=O)C=1)C	679031	1	3.5	270.714
Oc1c2c(cc3c1cccc3)C(=O)C=CC2=O	618201	1	2.424	224.212
O1[C@@H]2C[C@H](O)[C@@]3([C@H]([C@H](OC(=O)c4ccccc4)[C@]4(O)C[C@H](OC(=O)[C@H](O)[C@@H](NC(=O)c5ccccc5)c5ccccc5)C(=C([C@@H](OC(=O)C)C3=O)C4(C)C)C)[C@]2(OC(=O)C)C1)C	125973	1	3.055	853.906
[Bi+3]1234(S[C@-](N5CCCCCC5)[N-][N@@H+]1[C-](C=1N2CC=CC=1)C)(S[C@@-](N1CCCCCC1)[N-][N@H+]3[C@@-]([C@@H]1N4C=CC=C1)C)O[N+](=O)[O-]	666159	1	3.547	829.834
Clc1nc(nc2n(cnc12)Cc1cc(O)c(cc1)C12CC3CC(C1)CC(C2)C3)N	737429	1	4.37	409.912
BrCC1=Nc2c(NC1=O)cccc2	144168	1	1.51	239.069
[Sn]1(Sc2ncccc2C(O1)=O)(CCCC)CCCC	633502	1	4.926	386.097
Clc1ccc(cc1)C(NO)=N	13329	0	1.563	170.596
Fc1cc2[n+]([O-])c(C(=O)NCc3ccccc3)c([n+]([O-])c2cc1)C	744171	0	1.314	327.31
S1[C@H](c2c(n(nc2C)C(=O)c2ccccc2O)NC1=N)c1ccc([N+](=O)[O-])cc1	657992	1	3.729	409.418
O(C)c1c2CCCCc2ccc1	5242	0	3.326	162.228
O(C(=O)c1nc[nH]c1N=NN(CCO)C)C	98661	0	-0.03	227.22
O=C([N-]\N=C(/C)\c1ncccc1)[N-]\N=C(/C)\c1ncccc1	673828	1	1.384	294.311
O=C1C=C(Nc2ncccc12)c1ccccc1	658870	1	2.35	222.242
Cl/C(/C(/[N+](=O)[O-])=C(\Cl)/SCc1ccccc1)=C(\Cl)/Cl	665101	1	4.798	359.056
O=C([O-])c1[nH+]ccc(N2CCCCC2)c1	112810	0	0.755	206.241
O1C2=C([C@H](O)CC1(C)C)C(=O)c1c(nccc1C)C2=O	682223	1	1.057	273.284
Oc1ccccc1C(OCCO)=O	72097	0	0.903	182.173
O1c2c(cccc2)C(=C(c2ccc(OC)cc2)C1=O)c1ccc(O)cc1	102842	0	4.598	344.36
ClC[C@H]1c2c3c(cccc3)c(N)cc2N(C1)C(=O)c1[nH]c2c(c1)cc(OCC[NH+](C)C)cc2	694455	1	2.507	463.979
Clc1ccc(S)cc1	18714	0	2.854	144.622
Clc1cc(C)c(OCCCC(=O)[O-])cc1	102796	0	1.541	227.664
ClC1=C(Nc2ccc(cc2)C(=O)Nc2ccc(S(=O)(=O)N)cc2)C(=O)N(Cc2ccccc2)C1=O	728135	1	2.343	510.949
n1c2-c3c(CCc2cnc1N)cn(c3)C	748037	0	1.672	200.24
O=C(C)C=1[n+]2n([N-]C=1C)ccc2	341598	0	0.122	163.177
O(CC)C(=O)[C@@H](C(=O)C)CCC1CCCCC1	25340	0	3.36	240.339
O(C(=O)c1c(C#N)c(c2c([nH]c3c2cccc3)c1C(OC)=O)C#N)C	35948	0	2.791	333.298
O1C[C@@H]2O[C@H](OC)[C@@H](NC(=O)C)[C@@H](O)[C@H]2O[C@H]1c1ccccc1	75588	0	0.045	323.341
n1c(cnnc1N)-c1ccccc1	98929	0	1.305	172.187
S=C(Nc1cc(ccc1)C)NCCc1ncccc1	176377	0	3.894	271.381
Clc1ccc(NC(=O)c2cnn(c2N)-c2ccc(S(=O)(=O)N)cc2)cc1	747469	0	1.588	391.832
Clc1ccc(cc1)C(SC[C@H]([NH3+])C(=O)[O-])(c1ccccc1)c1ccccc1	123138	1	2.404	397.918
S(CCC)c1ncnc2nc[nH]c12	11595	0	1.715	194.257
[O-][n+]1c2c([n+]([O-])nc1NCC[NH+](CC)CC)cccc2	628915	1	-0.734	278.33
O(C)c1c(OC)cc(cc1OC)\C=C/c1cc(OC(=O)NCC[NH+](C)C)c(OC)cc1	641454	1	2.092	431.502
C1[C@@](c2c(cccc2)C1(C)C)(C)c1ccccc1	11311	0	4.835	236.351
s1c2c(nc1C=1CC(=O)N(C=1N)c1ccc(SC(F)F)cc1)cccc2	744116	1	4.138	389.442
O(C(=O)c1ccccc1C(OCCOCC)=O)CCOCC	4825	0	1.976	310.342
[Pb+4]12(O[C-](O1)[C@H](NC(=O)c1ccccc1)CC(C)C)(O[C-](O2)[C@H](NC(=O)c1ccccc1)CC(C)C)([C@H]1C=CC=C[CH-]1)[C@H]1C=CC=C[CH-]1	628683	1	8.559	831.966
S(C)C1=CC=C2c3c(cc(OC)c(OC)c3OC)C[C@@H](C2=CC1=O)CC(Oc1cc([N+](=O)[O-])ccc1)=O	648781	1	4.642	523.554
[Pt+2]1(Cl)(Cl)NC[Si]2(CCCCC2)CN1	645355	1	3.052	422.285
[Re]1234([P+](c5ccccc5)(c5ccccc5)c5ccccc5)(N=O)c5c1c2c3[c-]45	621334	1	4.582	538.552
Brc1cc\2c(NC(=O)/C/2=C\C(OC)=O)cc1	707048	1	1.816	282.09
O[C@@H]([C@@H]([NH+]1CCCCC1)c1ccccc1)c1ccccc1	33561	0	2.361	282.4
S(C)C1=CC=C2c3c(cc(OC)c(OC)c3OC)CC[C@H](NC(OCC)=O)C2=CC1=O	249278	1	3.594	445.529
O=C1C=CC(=O)c2c1cc(c1c3c(n(c12)C)cccc3)-c1ccccc1	661225	1	4.975	337.371
O1C=2N(c3c1cccc3)C(=O)c1c(cccc1)C=2CNc1cc(ccc1)[C@H](O)C	732508	1	4.046	384.427
O[C@@]1(CCCC[C@@H]1C)Cc1ccccc1	363740	0	3.58	204.308
BrCC(C(OC)=O)CBr	620109	1	1.667	259.924
S=C1N(CC)C(=O)C(C(=O)N[C@H](C)c2ccc([N+](=O)[O-])cc2)=C([O-])N1CC	684575	1	2.281	391.422
O(C)c1c(OC)cc(cc1OC)[C@@H]1N(N=C(C1)c1ccc(N(CC)CC)cc1)C(=O)C	745090	1	3.562	425.521
O=C1NN=C([C@@H](C1)c1ccccc1)c1ccccc1	41096	0	2.544	250.295
Oc1ccccc1N\C(=C\C(=O)C)\C	18415	0	1.64	191.226
FC(F)(F)c1[nH+]ccc(Nc2ccc(cc2)CC(=O)N\N=C\c2ccccc2O)c1	748673	1	4.658	415.388
O1c2c(OC1)cc1c(c2)C(=O)C2=C1N(CCCO)C(=O)c1cc(OC)c(OC)cc12	728091	1	1.473	409.389
O1[C@H](C\C=C\C(=O)[C@@H]2O[C@H]2C[C@H](O)[C@@H](O)c2c(C1=O)c(O)cc(OC)c2)C	354462	1	0.902	378.373
O1c2c(OC=C1C=1N(c3ncccc3OC=1)C(OC(C)(C)C)=O)cccc2	717212	1	2.49	366.367
O=C1N([O-])[C@H]2C=C[C@H](C2)[C@@H]1c1ccccc1	106286	0	0.905	214.24
O1c2c(C(=O)C(OC)=C1c1cc(OC)c(O)cc1)c(O)cc(OC)c2OC	678107	1	2.291	374.341
O1C[C@H]2[C@@H]([C@H](c3c(cc4OCOc4c3)[C@H]2[NH2+]CCCN2CCCC2=O)c2cc(OC)c(O)c(OC)c2)C1=O	651859	1	0.513	525.57
O1c2c(cc3OCOc3c2)[C@@H]([C@@H](C)[C@H]1[NH+](CC)CC)c1cc(OC)c(OC)c(OC)c1	667928	1	3.012	430.514
N1(c2c(-c3c(cccc3)[C@H]1C)cccc2)C	52094	0	3.641	209.286
ClCC(=O)c1oc([N+](=O)[O-])cc1	84429	1	1.516	189.553
Clc1cc(ccc1Cl)C(O[C@@H](C[N+](=O)[O-])C(Cl)(Cl)Cl)=O	3943	0	4.75	381.424
FC1=CN([C@@H]2OC(=O)C=C2)C(=O)N=C1OC	315844	1	0.418	226.161
Clc1cc(ccc1)COc1ccc(cc1)C(=O)N[O-]	692761	1	2.373	276.695
O1C(=C\C(=C/c2oc3cc([nH]c3c2)C(OC)=O)\C1=O)c1cc(OC)ccc1OC	745510	0	3.644	395.362
S=C(Nc1ccccc1C)[N-]\N=C(\c1ccccc1)/c1ncccc1	668326	1	5.986	345.441
[NH+]1(CCN(CC1)c1ccc(cc1)C)[C@@H](C#N)C	88441	0	1.089	230.329
s1nc(SC)c(C(=O)N)c1SC	379558	0	1.591	220.336
Oc1c(O)c(O)ccc1C(=O)c1ccccc1	30665	0	2.508	230.216
O=C(\C=C\c1ccccc1)CC[NH+]1CCCCC1	40302	0	1.638	244.352
s1ccnc1N1C(=O)[C@]2(CC[C@H](C2(C)C)C1=O)C	92848	0	1.871	264.343
S=C(Nc1cc(O)c(cc1)C(=O)[O-])[N-]NC(=O)c1ccncc1	34781	0	0.529	330.319
Brc1cc(cc(C)c1O)C1(OS(=O)(=O)c2c1cccc2)c1cc(C)c(O)c(Br)c1	374134	0	5.992	540.222
OC1(c2c(-c3c1cccc3)cccc2)C	43529	0	2.731	196.244
Oc1cc(ccc1)[C@]12CC(=O)/C(/[C@@H]([N@H+](CC1)C)C2)=C/c1ccccc1	678344	1	2.078	334.431
O(C)c1cc(ccc1OC)/C=C/1\C[C@H]2[C@@H]3[C@@H](CC[C@]2(C)\C\1=N\O)[C@@]1(C(C[C@@H](O)CC1)=CC3)C	713831	1	5.284	451.598
S1S\C(=N/C(=S)N(C)C)\N(Cc2cccnc2)C1=S	645619	1	4.564	328.5
O(C(=O)CC1CCCCC1)CC[NH+](CC)CC	16292	0	1.668	242.378
S(Cc1ccccc1)c1ccccc1C[NH+]1CC[NH+](CC[NH+](CC1)Cc1ccccc1SCc1ccccc1)Cc1ccccc1SCc1ccccc1	714198	1	6.86	769.157
O1[C@](c2c(cccc2)[C@@]1(O)c1ccccc1)(C#Cc1ccccc1)c1ccccc1	627693	1	6.252	388.457
O1CCN(CC1)C(=O)C[NH+]1CC[NH2+]CC1	332546	0	-4.097	215.293
[Pt+2]([Se](=O)(=O)c1ccccc1)([Se](=O)(=O)c1ccccc1)([O-])[O-]	626669	1	2.996	603.202
O1c2c(CC1=O)cc(O)cc2	61996	0	1.224	150.131
S(CC=1OC=C(O)C(=O)C=1)c1cccnc1	742928	0	0.469	235.259
O=C1NC(=O)N(C=C1[N+](=O)[O-])CC(OCC)OCC	88355	0	-0.428	273.243
s1c2[n+](cc1C)c1c(c3c2cccc3)cccc1	98883	1	3.945	250.338
Clc1ccccc1N1CC[NH+](CC1)CCC(OC)=O	33314	0	1.008	283.774
FC1(F)C[C@@H]2N(C1)C(=O)c1cc(OC)c(OCCCOc3cc4N=C[C@H]5N(CC(F)(F)C5)C(=O)c4cc3OC)cc1N=C2	741459	1	2.726	604.549
BrC1=C(N2CC[NH+](CC2)CCOCCO)C(=O)c2c(C1=O)c(O)ccc2O	659999	1	-0.777	442.281
O(C)c1cc2c(N[C@H](OC)[C@@H]3N(C/C(/C3)=C/C)C2=O)cc1O	177499	1	1.764	304.341
O=C(N(CC=C)CC=C)CC[N@@H+]1C[C@H]1C	89931	0	-0.297	209.308
[Cu+2]123([SH]=C(Nc4ccccc4)[N-][N@H+]1[CH-]c1c(O2)c(OC)ccc1)N1C=2C(C=CC=4C=2N3C=CC=4)=CC=C1	638308	1	3.593	545.115
O1CC(COC1c1cc([N+](=O)[O-])ccc1)(C)C	48561	0	2.33	237.252
ClCC(=O)N1c2c(N(C(=O)CCl)[C@H](C)[C@H]1C)cccc2	79304	1	2.121	315.195
n1c(nc(nc1N1N=C[C@H](C)[C@@H]1CC)N)/C(=N/c1ccc(N(C)C)cc1)/C#N	729115	1	3.457	377.446
Fc1cc(ccc1OC)C=1OC(=O)C=CC=1C#Cc1cc(OC)c(OC)c(OC)c1	740847	0	4.28	410.392
S1c2cc3c(nc2N(c2nc4c(cc12)cccc4)CCNC(=O)C)cccc3	744657	0	4.517	386.47
Clc1cc(Cl)ccc1CSc1nc(SCc2ccc(Cl)cc2Cl)nc(SCc2ccc(Cl)cc2Cl)c1	43263	0	12.012	653.321
O=C1N(Nc2ccccc2)[C@H](Nc2c1ccc1ncccc12)C	14742	0	2.816	304.346
o1cccc1\C=C\C(=O)N1CCOCC1	71575	0	0.794	207.226
O1Cc2c(N[C@@H]1c1cc([N+](=O)[O-])ccc1)cccc2	125821	0	2.938	256.257
O(CCCCOc1ccccc1)c1ccc([N+](=O)[O-])cc1	211130	0	3.982	287.31
S=C1NC(=O)C(/C(=C/C)/C)(CCC)C(=O)N1	120861	0	2.557	240.322
O(CC=C)C[C@@H](O)C[NH+](CCCC)CCCC	93285	0	1.391	244.393
Oc1ccccc1\C=N\NC(=O)C(O)(c1ccccc1)c1ccccc1	106723	1	3.37	346.379
O=C(Nc1ccccc1C)C(=O)Nc1ccccc1C	11023	0	2.853	268.31
O(C)c1cc2c(C3=C(N(CCC[NH3+])C2=O)c2c(cccc2)C3=O)cc1OC	733501	1	0.411	365.402
Clc1cc(Cl)cc(\C=N\NC(=O)c2ccccc2O)c1O	617581	1	3.528	325.147
O(C)c1cc(ccc1OC)C(=O)C	16944	0	1.537	180.2
Clc1ccc(NC(=S)c2sc(cc2)C[NH+](CC)CC)cc1	710019	1	3.892	339.926
N(Cc1ccccc1)c1ccc(cc1)C	8084	0	3.708	197.276
Clc1cc(Cl)ccc1OCC(=O)N[C@@H](CC(C)C)C(=O)[O-]	9203	0	1.925	333.187
O(C)c1cc(ccc1OC)CC(=O)[C@H]1c2c(N(C)C1=O)cccc2	105352	0	2.398	325.358
O1[C@@H](OC[C@@H](O)[C@@H]1[C@H]1O[C@@H](OC[C@@H]1O)c1ccccc1)c1ccccc1	1380	0	1.897	358.385
[Sn+4]123(OC(=O)CN1CCN2CC(O3)=O)([C@H]1C=CC=C[CH-]1)[C@H]1C=CC=C[CH-]1	633507	1	2.845	447.072
O1C(=CC(=O)C=C1\C=C\c1cc(O)c(OC)cc1)\C=C\c1cc(O)c(OC)cc1	703328	1	3.717	392.401
O(C)c1nc2c(cccc2)c(c1)C(=O)N1CCN(CC1)c1ccccc1	87034	1	3.582	347.41
O=C1NC(=O)NC12CCCCCC2	22850	0	1.223	182.22
S(=O)(=O)(N)c1cc2CCCc2cc1	91508	0	1.592	197.254
O1c2c(OC1)cc1NC(=CC(=O)c1c2)c1cc(N(C)C)ccc1	649122	1	2.891	308.331
O(C(=O)Nc1[nH]c2cc(ccc2n1)C(=O)c1ccccc1)C	184849	1	3.055	295.293
ClCCCCN(P(OCc1oc([N+](=O)[O-])cc1)(OC[C@@H]1O[C@@H](N2C=C(F)C(=O)NC2=O)C[C@@H]1O)=O)C[C@H](O)CO	734430	1	-0.981	614.9
[NH+]=1CCNC=1[N-]\N=C\1/c2c(-c3nc4c(nc/13)cccc4)cccc2	658835	1	2.748	314.344
Clc1ccc(cc1)C(Oc1c2c(sc1C(=O)C)N(c1ccccc1)C(=S)N(C2=O)c1ccccc1)=O	671135	1	7.58	533.018
O=C1N(C)C(=O)N(c2nc([nH]c12)CCc1ccncc1)C	74353	0	0.959	285.301
O=C(C)c1ccc(cc1)C(C)(C)C	826	0	2.97	176.255
O(C)c1c(OC)cc(cc1OC)C(=O)N\N=C\C(=O)[O-]	39078	0	-0.836	281.241
Clc1ccccc1C[N@@H+]1Cc2c(OC1)c1ncccc1cc2	297361	1	2.561	311.785
O(C)c1ccccc1NC(=O)C=1C(C(C(=O)Nc2ccccc2OC)=C(NC=1C)C)c1ccc(cc1)C1C(C(=O)Nc2ccccc2OC)=C(NC(C)=C1C(=O)Nc1ccccc1OC)C	633919	1	5.565	889.005
Clc1ccc(cc1)[C@H]1CC(=O)C[C@@H](C12C(=O)NC(=O)NC2=O)c1ccc(Cl)cc1	698286	1	3.303	431.269
Oc1c(c2c(nc1C)cccc2)C(=O)[O-]	64848	0	0.212	202.186
Clc1ccc(cc1)C(=O)[O-]	32738	0	0.65	155.558
O=C1C(=C([O-])C(=O)C(=C1[O-])c1ccccc1)c1ccc(cc1)CC	59064	0	2.105	318.323
O1CC(COC1c1cc(OC)c(OC)cc1)(CC)C	44729	0	2.859	266.333
O=C(N(N(C)C)C(=O)c1cc(ccc1)C)c1cc(ccc1)C	61844	0	3.378	296.364
[P+](Cc1cc(OC)ccc1OC)(c1ccccc1)(c1ccccc1)c1ccccc1	672194	1	6.689	413.468
OC[C@@H]1C[C@@H](n2c3nc(nc(NC4CC4)c3nc2)N)C=C1	742406	0	0.769	286.332
O=C1N(C(OCC)=O)C(=O)c2c1cccc2	76576	0	1.638	219.193
O1[C@H](C)[C@@H](O)[C@@H]([NH3+])C[C@@H]1O[C@@H]1c2c(C[C@](O)(C1)C(=O)C)c(O)c1c(C(=O)c3c(cccc3OC)C1=O)c2O	82151	1	-0.377	528.528
O1C[C@H]2[C@@H]([C@H](c3c(cc4OCOc4c3)[C@H]2[NH2+]CC[NH+](C)C)c2cc(OC)c(O)c(OC)c2)C1=O	651861	1	-0.625	472.531
Cl/C(/C(/N1CCOCC1)=C(\Cl)/[N+](=O)[O-])=C(\Cl)/Cl	665088	1	2.427	321.973
FC1=CN([C@@H]2O[C@H](CO)[C@@H](O)C2)C(=O)N=C1N	48006	1	-1.72	245.208
S(C)C1=CC=C2c3c(cc(OC(=O)C)c(OC(=O)C)c3OC)CC[C@H](NC(=O)C)C2=CC1=O	374980	1	2.17	471.523
OCC(N1CC(N=C1CCCCCCCCCCCCCCCCC)(C)C)(C)C	17762	1	7.794	408.704
[Te](CCCNC(=O)CCCCCNC1=CC(=O)c2c(cccc2)C1=O)c1ccccc1	748896	1	3.663	532.101
Oc1c2c(Cc3c(C2=O)c(O)ccc3)ccc1	43970	1	2.894	226.227
O(C)c1cc2c3N=CN(c4c3c(nc2cc1)c([N+](=O)[O-])cc4)CCC[NH+](C)C	691844	1	1.126	380.42
[Pb+4]1(O[C-](c2ccccc2)[CH-][C-](O1)c1ccccc1)([C@H]1C=CC=C[CH-]1)([C@H]1C=CC=C[CH-]1)[C@H]1C=CC=C[CH-]1	644908	1	9.055	664.782
O=[N+]([O-])c1ccc(cc1)[C@H]1C=C[C@H](C(C#N)(C#N)C1(C#N)C#N)c1ccccc1	691106	1	3.241	379.371
O=C1Nc2c(-n3c1c1c(cccc1)c3)cccc2	734235	1	2.86	234.253
Oc1c2c(ccc1)[C@@](O)([C@@H]1C(=C([O-])[C@@]3(O)[C@@H](C1)[C@H]([NH+](C)C)C([O-])=C(C(=O)NCNC=1NC(=O)c4nn[nH]c4N=1)C3=O)C2=O)C	67586	1	-4.5	607.551
Clc1cc(NC(=O)C)c(cc1)C	404301	0	2.1	183.635
O(C)C1=C(C)C(=O)C2=C([C@H]3[N@H+]([C@@H](C2)[C@@H]([N@H+]2[C@H]3Cc3c([C@@H]2CNC(=O)C(=O)C)c(O)c(OC)c(C)c3OC(=O)CO)C#N)C)C1=O	373355	1	-2.242	624.638
Clc1ncc(N)cc1	81	0	0.806	128.56
ClCC[N@H+](CCNc1c2cc(OC)ccc2[nH+]c2c1cccc2)CC	628114	1	3.012	359.893
o1c2c(cc1)c(nc1c2cccc1)Nc1cc(O)ccc1	730145	1	4.167	276.289
Clc1cc(NS(=O)(=O)c2ccccc2)c(NS(=O)(=O)c2ccccc2)cc1	28489	0	3.469	422.906
O(CCCCC(=O)Nc1c2c(c3c(c1)c1c(cc3)cccc1)cccc2)c1cc2N=C[C@H]3N(CCC3)C(=O)c2cc1OC	726259	1	5.705	571.665
Clc1ccc2c(nccc2)c1O	673451	1	2.438	179.603
Clc1ccc(cc1)\C=C\c1ccc(cc1)[C@H](O)C[NH+](C)C	26037	1	2.482	302.818
O(C)c1c(OC)cc(cc1OC)C(=O)c1cc(OCCC[NH+]2CCN(CC2)c2ccccc2OC)ccc1OCCC[NH+]1CCN(CC1)c1ccccc1OC	741455	0	3.659	770.953
Clc1ccc(cc1)C(=O)\N=C\1/SCCN/1CC(OCC)=O	740961	0	3.028	326.798
s1c2c(nc1N(C(=O)C)c1ccccc1)cccc2	3745	0	3.358	268.334
Clc1ccc(cc1)-c1nc([nH]c1)-c1c(OC)cc(OC)cc1OC	745925	0	4.204	344.792
o1cc(nc1-c1cc(OC)ccc1)-c1ccc(N)cc1	741588	0	2.836	266.295
O=C1NCN(C12CC[NH2+]CC2)c1ccccc1	96918	0	-0.734	232.302
O(Cc1c2c(cncc2)c(c2c1[nH]c1c2cccc1)C)C(=O)NC	610190	1	3.337	319.357
O=C(NC(=O)NC(=O)N)c1ccccc1	8178	0	0.392	207.186
O(C)c1cc(ccc1)C=1Nc2c(cc(N(C)C)cc2)C(=O)C=1	664172	1	3.107	294.348
o1nc(NC(=O)COC(=O)c2cc(Oc3ccccc3)ccc2)cc1C	745712	0	3.02	352.341
Cl[C@H]1[C@@H](C)[C@@H](\C=C\C(=O)[O-])[C@@H](OC)C[C@@H]1C	144952	0	0.971	245.722
Oc1cc(C[NH2+]C2CCCCC2)c(O)cc1C[NH2+]C1CCCCC1	48443	0	1.676	334.496
Oc1ccccc1\C=N\Cc1ccccc1	128931	0	3.191	211.259
o1cccc1\C=N\N1C(=O)C(C#N)=C(C=C1C)C	100759	0	1.721	241.245
o1cccc1[C@H](NC(OC(C)(C)C)=O)[C@@H](O)C(O[C@H]1C[C@@]2(O)[C@@H](OC(=O)c3cc(OC)ccc3)[C@H]3[C@@](C)([C@@H](O)C[C@H]4OC[C@@]34OC(=O)C)C(=O)[C@H](OC(=O)C)C(C2(C)C)=C1C)=O	674282	1	2.237	869.904
S(=O)(=O)(N(OCCC[NH3+])CCCCC[NH3+])c1c(C)c(c2OC(CCc2c1C)(C)C)C	703117	1	0.841	443.644
O1c2c3[C@@H]([N@@H+](CCc3cc(OC)c2OC)C)Cc2cc(Oc3ccc(C[C@@H]4[N@@H+](CCc5cc(OC)c1cc45)C)cc3)c(OC)cc2	77037	1	4.096	624.766
Clc1ccccc1C=1Nc2c(cc3OCOc3c2)C(=O)C=1	657278	1	3.394	299.709
O=C1N(C)C(=O)N(c2nc(n(c12)C)[C@@H](O)C)C	36520	0	-0.027	238.243
n1c(nc(nc1N)N)[C@H]1CCCC=C1	4426	0	1.131	191.233
Clc1cc(S(=O)(=O)NO)c(N)cc1C	163635	0	0.951	236.676
O=C1N(CCC1)c1ccccc1	25325	0	1.411	161.2
Clc1cc(OC(=O)c2ccccc2Nc2cc([nH+]cc2)C(F)(F)F)ccc1	731823	1	6.108	393.767
n1c2c(ccc3c2nccc3)ccc1	4265	1	2.202	180.205
[P+]([C@@H]1P=PC(=P(c2ccccc2)(c2ccccc2)c2ccccc2)[C@@H]1c1ccccc1)(c1ccccc1)(c1ccccc1)c1ccccc1	676863	1	11.634	701.67
BrCC[P+](c1ccccc1)(c1ccccc1)c1ccccc1	264077	1	5.948	370.243
O1CCN(CC1)c1ccc(N)cc1	26334	0	0.933	178.231
O1c2c(C3=C4C=C(O)C(=O)C=C4C[C@]3(O)C1)ccc(O)c2O	7333	0	0.814	300.263
S=C(N(C)C)[N-]\N=C(/C)\c1ccccc1O	667886	1	2.997	236.313
O(C)c1ccc(cc1)C=1C[C@@H]2N(CCC2)C(=O)C=1c1ccccc1	707904	1	3.698	319.397
Clc1cc(C)c(Nc2nc(ccc2C(=O)Nc2cc(ccc2)C(F)(F)F)C(F)(F)F)cc1	737061	1	7.016	473.799
O=[N+]([O-])c1cc-2c(Cc3c-2cccc3)cc1	3016	0	3.387	211.216
O1[C@@H](COC(=O)C)[C@H](OC(=O)C)[C@@H](OC(=O)C)[C@@H](OC(=O)C)[C@@H]1N=[N+]=[N-]	272456	0	0.304	373.315
Clc1ccc(cc1)CS(=O)c1ccccc1	20883	0	3.507	250.744
O1c2c(C(=O)C(OC)=C1c1cc(OC)c(O)cc1)c(O)cc(OC)c2OC	640328	1	2.291	374.341
Oc1c2c(ccc1C)c(c1c(C(=O)[C@]3(O)[C@@H](C1)[C@H]([NH3+])C([O-])=C(C(=O)C)C3=O)c2O)C	73495	1	-0.631	411.405
Clc1ccc(cc1)C1=NC(=O)C(=NN1)c1c2c(n(c1)C)cccc2	710328	1	3.852	336.775
O(C)c1c2c(C[C@H]3N([C@H]2C)C(=O)[C@@H]2[N@@H+]([C@H](c4c(C2)c(OC)ccc4OC)C)[C@@H]3C#N)c(OC)cc1	675012	1	1.879	478.56
Clc1ccc(cc1)[C@@H]1NN=C2[C@@H]1COc1c2cccc1	682860	1	3.262	284.74
O(CC[NH+](C)C)c1c2c(c-3c(c1)C(=O)c1c-3cccc1)cccc2	625255	1	2.392	318.389
S(CCC(=O)N\N=C\c1ccccc1O)CCC(=O)N\N=C\c1ccccc1O	29867	0	2.217	414.478
Clc1sc(cc1)C(=O)C	43020	0	1.982	160.621
O1[C@@H](CC(CCC\C(=C\C=C\[C@@H](CCCc2ccoc2)C)\C)=C)[C@@H](O)[C@@H](C)C1=O	701650	1	6.283	400.551
O1CCC\C(=C\c2cc3OCOc3cc2)\C1=O	99034	0	2.412	232.232
O1[C@H]2CC[C@]3(O[C@H]3C[C@H]3CC[C@](O)([C@@H](CC[C@]12C)C3(C)C)C)C	743495	0	3.091	322.482
O=C1n2c(N=NN1c1ccccc1)c(C#N)c(C)c2-c1ccccc1	701657	1	5.579	327.339
P(O[C@H]1C[C@@H](O[C@H]1CO)N1C=C(F)C(=O)NC1=O)(OC[C@@H]1O[C@@H](N2C=CC(=NC2=O)NCCCCCCCC\C=C/CCCCCCCC)[C@@H](O)[C@@H]1O)(=O)[O-]	680417	1	2.158	800.828
o1nc(nc1CC[NH+](CC)CC)-c1ccccc1	100298	0	0.872	246.328
Brc1cc(cc(Br)c1O)C	76596	0	3.57	265.93
FC(F)(F)[C@@H]1CC2(CCC1)[C@H](C#N)C(=O)NC(=O)[C@@H]2C#N	103189	0	1.436	299.248
O(CC)c1ccc(NC2=CC(=O)C(=O)c3c2cccc3)cc1	637732	1	3.17	293.317
O=C(Nc1ccccc1)c1nc([nH]c1)C	10012	0	1.191	201.225
O(C)c1ccccc1\C=C\C(=O)\C=C\c1ccccc1O	98938	1	3.901	280.318
Clc1cc(NC(=O)COc2ccccc2C(=O)N)ccc1Cl	33738	0	2.78	339.173
O1C[C@]12[C@@H]1O[C@@H]3C=C(C)[C@@H](OC(=O)CC(C)C)C[C@]3(COC(=O)C)[C@@]2(C)[C@H](O)[C@H]1O	278571	1	0.607	424.485
o1c2c(c3c1[nH+]c1c(cccc1)c3NCC[NH+](C)C)cccc2	737618	1	2.196	307.39
O(C)c1ccc(cc1)\C=C(\C(=O)C)/C(=O)C	46596	0	1.702	218.248
Clc1ccc(SC(Sc2ccc(Cl)cc2)=S)cc1	111118	1	7.161	331.304
n1c(nc2c(cccc2)c1N)CN1CCc2c1cccc2	743282	0	2.889	276.336
Brc1cc(ccc1O)C\C(=N/O)\C(=O)NCCSSCCNC(=O)/C(=N/O)/Cc1cc(Br)c(O)cc1	614495	1	4.068	664.387
Brc1cc(ccc1OC)\C=C/1\CC[C@@](CC[NH+](C)C)(C\1=O)C=1CCCC=1	639624	1	3.727	419.375
O1[C@H](CC(OC)=CC1=O)\C=C\c1ccccc1	112162	0	2.218	230.259
O1[C@@H]2[C@@H]3[C@@H]4C(=CC1)C[N@@H+]1[C@H]([C@@]5([C@H]3N(c3cc(OC)c(OC)cc35)C(=O)C2)CC1)C4	123398	0	-0.448	395.471
O=C1N(Cc2ccccc2)C(=O)N(C=C1[N+](=O)[O-])Cc1ccccc1	86750	0	2.309	337.329
O([C@H](C[NH2+]C1CCCCC1)C)C(=O)c1ccc([N+](=O)[O-])cc1	120242	0	2.187	307.365
Brc1ccc(cc1)C(=O)C	17541	0	2.318	199.045
O=C1N(N(C)C(C)=C1\C=C(/C#N)\c1ccc([N+](=O)[O-])cc1)c1ccccc1	89266	0	2.898	360.366
O1CCOc2c(OCc3nc([nH]n3)COc3cc(ccc3OCC1)C(C)(C)C)cc(cc2)C(C)(C)C	684444	1	5.261	495.61
Clc1[nH]c2c(cc(O)cc2)c1\C=C/1\c2c(NC\1=O)cccc2	717202	1	3.241	310.734
S(C[C@@H]([NH3+])C(OCC)=O)C(=O)NC	303861	0	-1.068	207.271
Oc1ccc(O)cc1C[C@@]1([C@H]2CCC=C(C)[C@@]2(CC[C@H]1C)C)C	691033	1	5.703	314.462
Clc1cc(C)c(NC(=O)C=2N3C(SC=2C(=O)Nc2ccc(cc2)C(OC(C)C)=O)=Nc2c(cc(OC)c(OC)c2)C3=O)cc1	743247	1	5.186	635.087
Fc1cc(Nc2ccc(F)cc2[N+](=O)[O-])cc(F)c1	93390	0	3.89	268.191
S(=O)(=O)(Nc1nc(C)c(nn1)C)c1ccc(NC(=O)C)cc1	41278	0	0.278	321.355
Clc1ccc(cc1)-c1nn(c(N)c1)C1=NC(=O)C(=NN1)\C=C\c1occc1	748494	1	3.753	380.788
s1c2c(nc1SCc1nc3n(S(=O)(=O)c4c(N3c3ccccc3)cccc4)n1)cccc2	741181	0	5.63	477.582
s1cc(nc1N)C	40462	0	0.363	114.169
O=C(Cc1c(cc(cc1C)C)C)c1ccccc1	63	0	4.727	238.324
O(C)c1cc(ccc1OC)CC(=O)Cc1cc(OC)c(OC)cc1	176998	0	3.228	330.375
O=C\1N(C)C(=O)N(C)C(=O)/C/1=N\O	14273	0	-0.727	185.137
Oc1cc(C)c(\N=C\c2ccc(N(C)C)cc2)cc1C(C)C	30940	0	5.027	296.407
ClC=1C(=O)N(N=CC=1Cl)C(N)=N	625820	1	0.267	207.017
S(=O)(=O)([O-])c1cc(N)c2c(c1)cc(S(=O)(=O)[O-])cc2O	8632	0	-4.075	317.295
O1CC[NH+](CC1)C[C@@H](O)COc1ccccc1	89427	0	-0.432	238.303
[Cu+2]123([SH]=C(N)[N-][N@H+]1[CH-]c1c(O2)c(OC)ccc1)([O-])N1C(=C2N3C=CC=C2)C=CC=C1	638302	1	0.436	460.997
O(C)c1cc2c3c([nH]c2cc1)c(c1c(cncc1)c3C)COC(=O)NC	631392	1	3.321	349.383
O([C@@H]([NH+]1CCCCC1)C)C(=O)Nc1cc(NC(O[C@H]([NH+]2CCCCC2)C)=O)ccc1C	47148	0	1.154	434.572
O=C1NC(=O)NC=C1C[C@@H](O)C	173722	0	-0.958	170.166
Oc1c2ncccc2c(cc1)Cc1ccccc1	32190	1	3.748	235.281
O1[C@@H](CCCC1=O)C	32863	0	1.11	114.142
s1c2c(cc1C1([NH2+]CCC[NH3+])CCCCC1)cccc2	708075	1	1.233	290.467
[Nd+7]123(O[C-](c4ccccc4)[CH-][C-](O1)c1ccccc1)(O[C-](c1ccccc1)[CH-][C-](O2)c1ccccc1)(O[C-](c1ccccc1)[CH-][C-](O3)c1ccccc1)[O-]	647040	1	10.862	830.987
O1C[C@H]2[C@@H]([C@H](c3c(cc4OCOc4c3)[C@H]2[NH2+]C2CC[NH+](CC2)Cc2ccccc2)c2cc(OC)c(O)c(OC)c2)C1=O	651854	1	0.931	574.664
O(C(=O)c1[nH]c2c(c1)cccc2)c1cc2N=C[C@H]3N(CCC3)C(=O)c2cc1OC	702015	1	3.351	389.404
Oc1cc(-c2cc(O)c(N)cc2C(=O)[O-])c(cc1N)C(=O)[O-]	30650	0	-2.318	302.239
O=C(c1ccc(cc1C)C)C1CC1	71981	0	3.3	174.239
S(c1n(cnc1[N+](=O)[O-])C)c1nc([nH]n1)-c1ccc(OC)cc1	631162	1	2.789	332.338
O=C1NC(=O)[N-]N=C1C	3426	0	-0.811	126.093
O(C(=O)[C@H]1CCCC12Nc1c3c(ccc1)cccc3N2)CC	95016	0	3.361	296.364
S(C)C=1NC([O-])=C(Nc2ccccc2)C(=O)N=1	60804	0	1.28	248.281
O=C1CC[C@]2([C@H](C1)C[C@H]([C@H]1[C@@H]3CC[C@](O)(C)[C@]3(CC[C@@H]12)C)C)C	143924	0	3.758	318.493
S=C1N(C)C(=O)C(=NN1C)C	56902	1	0.519	171.22
Clc1cc(Cl)cc(\C=N/NC(=O)CSCC(=O)N\N=C/c2cc(Cl)cc(Cl)c2O)c1O	724061	1	4.379	524.205
O=C1N([C@@H]2CCC[C@H](C1)C2)CC	110761	0	1.421	167.248
O=C1NC(=O)N(C=C1)CCCC	55188	0	0.522	168.193
O1CCN(CC1)c1nc(ncn1)N	109885	0	0.091	181.195
O=C(Nc1cccc(C)c1C)[C@@H]/1CCC\C\1=N/c1cccc(C)c1C	88796	0	5.401	334.455
O1[C@H]2[C@@H](OC1(C)C)O[C@H]([C@@H](OCC[NH+]1CCCC1)C)[C@@H]2CCOCCCCCCCCCCC	665640	1	3.74	484.732
O=C([O-])c1ccccc1\C=N\N=C/1\NC=CC=C\1	98570	0	-0.263	240.237
S=C(N)[N-]\N=C/c1nccc2c1cccc2	162700	1	2.478	229.281
O(CC[NH+](CC)CC)c1ccc(cc1)\C=N\N=C\1/NC2=C(N/1)N(C)C(=O)N(C)C2=O	64664	0	-0.187	414.481
Clc1cc(N2CC[NH+](CC2)C[C@H](O)COc2ccc(OC)cc2)ccc1	91364	0	2.158	377.885
[N@H+]1(C[C@H](c2c(C1)c(N)ccc2)c1ccccc1)C	289114	0	1.022	239.335
s1c(nnc1N)-c1cc(OC)c(OC)cc1	13124	0	1.449	237.278
S=C(N1CCOCC1)c1ccc(OC)cc1	58869	0	2.338	237.318
O(C)c1c(OC)cc(N[C@@H](C)c2ccc(OC)cc2)cc1OC	631369	1	3.534	317.38
O=C1C=C(C)[C@@H](C(OCC)=O)[C@@H](C1)C	10140	0	1.748	196.243
S=C(N(C)C)[N-]\N=C(/C=N\[N-]C(=S)N(C)C)\C	693325	1	3.033	272.394
O1CC[NH+](CC1)CCn1cncc1[N+](=O)[O-]	107524	0	-1.793	227.24
O(C(=O)C)[C@H]1CC[C@]2([C@H](C1)CC[C@H]1[C@@H]3CC[C@@H]([C@H](OC(=O)C)C)[C@@]3(C)/C(=N/O)/C[C@@H]12)C	119079	0	3.884	433.581
[Sn](OC(=O)CC)(CCCC)(CCCC)CCCC	99154	1	5.875	363.123
O=[N+]([O-])c1ccc(cc1)\C=N\c1ccccc1	403941	0	3.32	226.231
F[C@@H]1C[C@H](O[C@@H]1CO)N1C=CC(=NC1=O)\N=C\N(C)C	614989	0	-0.959	284.287
O=C1CCC(CC1)[C@@H](CCC)C	21158	0	3.186	168.276
O(CC)c1ccccc1\C=N/NC(=O)C(=O)N\N=C\c1ccccc1OCC	53328	0	2.683	382.413
O(Cc1[nH]c2c(n1)N(C)C(=O)N(C)C2=O)c1ccccc1	14315	0	1.454	286.286
s1c/2c(/C(/S\C\2=N/c2ccc(OC)cc2)=N/c2ccc(OC)cc2)c(C(OC)=O)c1C(OC)=O	710393	1	5.459	496.555
Clc1ccc(cc1[N+](=O)[O-])C(F)(F)F	8760	0	3.331	225.552
O1CC[NH+](CC1)CCOc1cc(ccc1)\C=C\1/C[C@H]2[C@H]3[C@H](CC[C@]2(C)[C@H]/1OC(=O)C)[C@@]1(C(C[C@@H](OC(=O)C)CC1)=CC3)C	736761	1	3.87	592.785
O(C)C=1NC(=O)C=2N=C3C([C@]4(NC=2N=1)C=C(O)c1c4cccc1)=C(O)c1c3cccc1	746598	0	2.019	412.398
O(C)c1nccnn1	146047	0	0.088	111.102
O1c2c3c(c(OC)cc2-c2c(cc(cc2OC)C=C)C1=O)c(O)ccc3[C@H]1O[C@@H](C)[C@H](O)[C@@](O)(C)[C@@H]1O	354844	1	2.837	508.517
Clc1ccc(cc1)-c1cc(nc(SCC(OCC)=O)c1C#N)-c1oc2c(c1)cccc2	745278	0	6.419	448.921
OCCC[N@H+]1C[C@H]([N@@H+](CC1)CCC)C	111202	0	-2.071	202.337
Clc1cc(cc(C(=O)[O-])c1O)\C(=C\CC[C@H]1CC[C@]2([C@H](C1)CC[C@@H]1[C@@H]3CC[C@@H]([C@@H](CCCC(C)C)C)[C@]3(CC[C@H]12)C)C)\c1cc(C(=O)[O-])c(O)c(Cl)c1	640067	0	10.162	765.844
O(C)c1ccc(cc1)[C@H]1[C@@H]2C=C[C@@H](C2)[C@H]1C(=O)[O-]	167523	0	0.946	243.278
Clc1ccc(cc1)C1(NC(=O)N(C)C1=O)c1ccc(Cl)cc1	273812	0	3.639	335.185
Oc1ccc(cc1)\C(=N\Nc1cc(N)c([N+](=O)[O-])cc1[N+](=O)[O-])\c1ccc(O)cc1	746315	1	3.651	409.352
S(C[C@@H]([NH3+])C(=O)[O-])C(=O)N	102498	0	-3.322	164.183
O(C)c1ccccc1\C=N/NC(=[NH2+])C(=[NH2+])N\N=C\c1ccccc1OC	46695	0	1.887	354.406
O(C(=O)C)[C@H]1C[C@]2([C@@H](CC[C@H]3[C@@H]4CC[C@H]([C@H]([NH+](C)C)C)[C@]4(CC[C@H]23)C)[C@@H](O)[C@H]1NC(=O)\C(=C\C)\C)C	748900	1	2.969	503.737
Brc1cc-2c(cc1N)[C@@H](O)c1cc(F)ccc1-2	73070	0	2.733	294.119
Clc1cc(ccc1Cl)-c1n2c(CCC2)c(COC(=O)NCCC)c1COC(=O)NCCC	278213	1	5.955	482.4
S=C(Nc1ccccc1OC)[N-]\N=C\c1ncccc1	668298	1	3.839	285.344
O(C)c1cc(N[C@@H](CCC[NH3+])C)c2ncccc2c1	27296	0	0.994	260.355
O1c2cc(OCc3nnn(c3)C[C@@H](O)CO)ccc2C=CC1=O	742935	0	0.814	317.297
Clc1cc(Cl)ccc1[C@@H]1NC(=O)NC1=O	30744	0	1.887	245.062
Brc1cc(cc(Br)c1O)C1(OS(=O)(=O)c2c1cccc2)c1cc(Br)c(O)c(Br)c1	7818	0	6.516	669.961
Brc1cc2cc([C@H]3N(C(=O)[C@H]3Cl)c3cc(Cl)c(F)cc3)c(Cl)nc2cc1	716210	1	5.933	474.538
S(C)C1=C(SC)C(=O)C=2C(=CC(=O)N(C=2)C)C1=O	667275	1	0.203	281.351
O=C1C2=C(N(CC[NH2+]CC[NH2+]CCN3C4=C(c5c(cccc5)C3=O)C(=O)c3c4cccc3)C(=O)c3c2cccc3)c2c1cccc2	726973	1	0.993	608.685
O=C([O-])c1cc(ccc1C(=O)[O-])C	83573	0	-1.373	178.142
Clc1cc(Cl)ccc1C(=O)NCCC	6866	0	3.239	232.106
O1[C@H](COC(=O)C)[C@@H](OC(=O)C)[C@@H](OC(=O)C)[C@@H]1N1C=CC(=NC1=O)N	93150	0	-1.259	369.327
O=[N+]([O-])c1cc[n+]([O-])cc1	5079	0	-0.271	140.097
O(C)c1cc2c([nH+]c3c(c2NCC[NH+](CCO)CCO)c([N+](=O)[O-])ccc3)cc1	673793	1	0.814	402.444
s1c2CCCCc2c2c1-n1c(nnc1CNc1ccc(cc1)C(=O)C)N(Cc1ccccc1)C2=O	743388	0	4.757	483.585
S(Cc1ccccc1)C[C@@H]([NH3+])C(=O)[O-]	2527	0	-1.313	211.281
FC(F)(F)C(=O)N[C@@H]1C2=CC(=O)C(OC)=CC=C2c2c(cc(OC)c(O)c2OC)CC1	335989	1	2.906	439.382
S=C1NC(=O)C(CCO)(CC)C(=O)N1	85042	0	0.418	216.257
O=C(NC(=O)N)c1ccccc1	402028	0	0.612	164.161
FC(F)(F)c1ccccc1[C@@H]1C[C@@H]2[C@H](C(OC)=O)[C@@](O)([C@@H](C(OC)=O)C([O-])=C2C(OC)=O)[C@H]1C(OC)=O	733346	1	1.101	529.437
Ic1cc(ccc1)C(OC)=O	34639	0	2.263	262.044
ClC[C@H]1c2c3c(cc(NC(=O)C)cc3)c(O)cc2N(C1)C(=O)CCCCCCC(=O)N1C[C@H](c2c3c(cc(NC(=O)C)cc3)c(O)cc12)CCl	711948	1	4.517	719.653
O1C[C@]1([C@H](OC(=O)c1c2c(ccc1)cccc2)C(=O)N)C	727014	1	1.504	285.295
O(C(C)(C)C)C(=O)N[C@@H](C(C)C)C(=O)N[C@H](Cc1c2c([nH]c1)cccc2)C(OC)=O	106697	0	3.376	417.499
S1[C@@H]2NC3=C([C@]4(C1=CC(=O)C=C4)C2)C1=NCCc2c1c([nH]c2)C3=O	656204	1	1.195	335.38
O=C1c2c([nH]c3c2cccc3)C(=O)C=C1C	654274	1	2.789	211.216
s1cccc1C(=O)CC(=O)c1ccncc1	42779	0	1.957	231.27
OC(C[N@H+](Cc1ccccc1)C)C[N@@H+](Cc1ccccc1)C	13387	0	-0.007	300.438
O=C([O-])c1ccccc1C(=O)[O-]	5348	0	-1.859	164.115
O(C(=O)C(O)(c1ccccc1)c1ccccc1)CC[NH+]1CCCC1	23582	0	1.653	326.409
O(C)c1ccc(cc1)\C=C/1\C(=O)NC(=O)NC\1=O	93944	0	0.848	246.219
[NH2+]1CCCC[C@H]1c1cccnc1	87504	0	-0.068	163.239
[Pt+2]1(Cl)(Cl)NCC[Si](CN1)(C)C	630765	1	1.882	396.248
O1CC(=CC1=O)[C@H]1CC[C@]2(O)[C@H]3[C@H](CC[C@]12C)[C@]1(CC[C@H](OC(=O)C)C[C@@]1(O)CC3)C=O	92954	1	1.718	446.533
O=C(CCCc1ccncc1)c1ccccc1	101006	0	3.03	225.286
S(CC(=O)C=1C(=O)N(C)C(=O)N(CCC)C=1N)c1[nH]c(nn1)-c1ccccc1F	744205	0	1.837	418.445
O1CCN(CC1)c1nc(cc(-c2cc(OC)c(OC)c(OC)c2)c1C#N)-c1ccc(N(C)C)cc1	741364	1	4.525	474.552
O=C(NNCc1ccccc1)c1ccccc1	50990	0	2.129	226.274
O=C1C=Cc2c3c1cccc3c1c(c2)cccc1	727350	1	3.688	230.261
Oc1ccccc1\C=N\NC1=Nc2c(cccc2)C(=O)N1c1ccccc1	666354	1	4.011	356.377
O(C(=O)C(Cc1nc2c(cc1)cccc2)(Cc1nc2c(cc1)cccc2)C#N)CC	99398	0	4.672	395.453
O(C(=O)C)c1c2c(cccc2)c(OC(=O)C)c2c1cccc2	4719	0	3.182	294.301
Clc1cc(NC(=O)C)c(cc1)C(=O)Nc1n(ncc1CC(OCC)=O)C	749539	0	1.412	378.81
O=C1c2c(-c3c(ccc(C)c3C)C1=O)c(C)c(cc2)C	135880	1	4.753	264.318
O(C(=O)C(CC=C)(CC=C)C(OCC)=O)CC	30683	0	2.677	240.295
S=C1NC[C@@H](C)C(=O)N1c1ccc(OCC)cc1	121904	0	2.759	264.343
O(CCOCCOc1ccccc1)c1ccccc1	6805	0	3.314	258.312
Ic1nc(N)c2ncn(c2n1)[C@@H]1O[C@@H](COS(=O)(=O)N)[C@@H](O)[C@@H]1O	687509	1	-1.631	472.216
O(C)c1cc2N([C@@H]3[C@@]4([C@H]5[N@H+](CC=C[C@@]5(CC)[C@H](OC(=O)C)[C@@]3(O)C(OC)=O)CC4)c2cc1[C@@]1(c2[nH]c3c(c2CC[N@@H+]2C[C@H]([C@@H]4[C@@H](CCCC4)C2)C1)cccc3)C(OC)=O)C	655616	1	3.116	823.028
S(C)C1=CC=C2c3c(cc(OC)c(OC)c3OC)C[C@@H](C2=CC1=O)CC(Oc1ccc([N+](=O)[O-])cc1)=O	648778	1	4.642	523.554
OCCn1nc(C)c([N-][N@H+]([O-])c2c(n(nc2C)CCO)C)c1C	179945	1	-0.463	323.371
S=C(N1CCN(CC1)c1cc(ccc1)C)c1cc(OC)c(OC)cc1	83502	1	4.75	356.482
s1c2c(nc1N\N=C(/C1CCCCC1)\c1ncccc1)cccc2	720197	1	5.459	336.454
O1c2c(OC1)cc-1c(Cc3c4c(cc(OC)c(OC)c4OC)cnc-13)c2	730922	1	3.398	351.353
O1c2c(cc3OCOc3c2)[C@H](C[C@]1([NH+]1CCCC1)C)c1cc(OC)c(OC)c(OC)c1	371002	1	2.266	428.498
s1nc(c2ncnc(N)c12)[C@H]1O[C@H](CO)[C@H](O)[C@@H]1O	675865	1	-1.075	284.292
O=C1NC=2C(=NC(=C1)C)NC=NC=2	92264	0	-1.393	176.175
ClCCn1c2ncnc(SCc3ccccc3)c2nc1	58905	1	3.301	304.798
O=C([O-])c1cc2c(cc(cc2)C(=O)[O-])cc1	96410	0	-0.951	214.174
Fc1cc(cc(F)c1)C(O[C@@H]1[C@H]2[C@@](C)([C@@H](O)C[C@H]3OC[C@@]23OC(=O)C)C(=O)[C@H](OC(=O)C)C=2[C@]1(C[C@H](OC(=O)[C@@H](O)[C@@H](NC(=O)c1ccccc1)c1ccccc1)C=2C)C(C)=C)=O	661746	1	4.34	871.872
O[C@]1(CC\C(=C(\C=O)/C)\[C@@H](CCCO)[C@@]1(CC\C=C(\C=C\[C@H]1C(C)(C)[C@H](CC=C1C)C)/C)CO)C	631939	1	5.927	486.726
O(Cc1ccccc1)C(=O)N(CCCCN(CCC[NH2+]Cc1ccccc1)C(OCc1ccccc1)=O)CCC[NH2+]Cc1ccccc1	690023	1	4.109	652.865
O=C(Cn1c2c(nc1C(=O)C)cccc2)c1ccccc1	674256	1	2.953	278.305
O=C1N=C(N)C(=CN1)c1ccc([N+](=O)[O-])cc1	337826	0	0.415	232.196
O1CC(=C(c2ccc(OC)cc2)C1=O)c1ccc(OC)cc1	727207	1	3.312	296.317
Fc1cc2c/3n([n+](c2cc1)C)-c1c(cccc1)\C\3=C/c1ccc(N(C)C)cc1	726091	1	5.789	370.442
O(CC=C)c1ccccc1C	103149	0	2.916	148.202
O(CC[NH+]1CCCC1)c1ccc(cc1OC)\C=C\1/C[C@H]2[C@H]3[C@H](CC[C@]2(C)[C@H]/1OC(=O)C)[C@@]1(C(C[C@@H](OC(=O)C)CC1)=CC3)C	730477	1	4.627	606.812
S=C(Nc1ccccc1)N(CC(O)(C)C)CCCNC(=S)Nc1ccccc1	99892	0	5.484	416.603
O1c2c(OC1)cc1c(c2)C(=O)C2=C1N(CCC[NH2+]C(CO)(C)C)C(=O)c1cc(OC)c(OC)cc12	726971	1	0.428	481.518
O1CC[NH+](CC1)CCNC(=O)c1c2nc3c(nc2n(c1N)-c1cc(OC)c(OC)cc1)cccc3	744231	1	0.816	477.536
[I+](c1ccc([N+](=O)[O-])cc1)c1ccccc1	90600	1	3.981	326.11
O1\C(=C\C=C\C=C\C=C/C[C@@H](NC(=O)\C=C/C=C\C=C\C=C\[C@@]2(C(=C([O-])[C@H](OC)[C@H]2O)C1=O)C)c1ccccc1)\C	648060	1	3.541	554.653
O(C)c1cc2c(cc1N)-c1c(cc(N)cc1)C2=O	125539	0	1.413	240.257
O(CC)c1ccc(NC(OCCCCCCCC)=O)cc1	88460	0	5.079	293.401
O(C)c1cc2c(C=3N(CCC[NH3+])C(=O)c4c(C=3C2=O)cccc4)cc1	736988	1	0.427	335.376
Clc1cc(Cl)ccc1OC[C@H]1OC1	634	0	2.858	219.065
S1[C@@H]2[C@@H]3[N@H+]([C@@H](c4c2c(OC(=O)C)c(c2OCOc24)C)COC(=O)[C@]2([NH2+]CCC=4[C@H]5[C@H](NC2=4)C=CC=C5)C1)[C@@H](O)[C@@H]1[NH2+][C@H]3c2c(cc(C)c(OC)c2O)C1	648768	1	-0.963	745.861
O(C)c1cc2c(c3n(cc(c3cc2)C(=O)NCCC[NH+](CCCNC(=O)c2c3c(n(c2)C)c2c(cc(OC)cc2)cc3)C)C)cc1	699192	1	3.38	620.76
BrC=1c2c(cccc2)C(=O)c2c(cccc2)C=1Br	366220	1	4.295	364.031
O1c2c(OC1)cc1c(c2)/C(/C2=C1N(C)C(=O)c1cc(OC)c(OC)cc12)=C\CCCC[NH3+]	729635	1	1.827	435.492
O=C1NN=C([C@@H]1C)c1ccc([N+](=O)[O-])cc1	109901	0	1.371	219.197
Clc1ccc(Nc2nc(nc(n2)Nc2ccc(F)cc2)Nc2ccc(cc2)C(=O)\C=C\c2ccc(N(C)C)cc2)cc1	743884	1	9.063	580.054
O=C1c2c(C(=O)c3c1cccc3)c(NCC[NH3+])c1[nH]ccc1c2NCC[NH3+]	724627	1	-0.949	365.429
S(C(=O)C)[C@@H]1CC(=O)C=C2CC[C@@H]3[C@H](CC[C@@]4(OC(=O)CC[C@@H]34)C)[C@@]12C	15428	0	3.256	376.51
O(C)c1cc2[nH]c3[C@@H]4[N@H+](CCc3c2cc1)C[C@@H]1[C@H](C4)[C@H](CO)[C@@H](OC)[C@H](O)C1	80137	0	0.241	387.493
O(C)c1ccc(cc1)\C=C\[N+](=O)[O-]	23856	1	1.793	179.173
O1CC\C(=C/OCCCO\C=C\2/CCOC/2=O)\C1=O	178873	0	0.136	268.263
S=C1NC(=O)[C@](Cc2ccccc2)(CC)C(=O)N1C	120911	0	2.881	276.354
Clc1cc(C(=O)c2ccccc2)c(OCCCC[NH+]2CC[NH+](CC2)CCCCOc2ccc(Cl)cc2C(=O)c2ccccc2)cc1	736167	1	5.842	661.657
N(c1ccc(N)cc1N)c1ccccc1	6092	0	1.886	199.252
S(=O)(=O)([O-])c1c2c(ccc1)c(S(=O)(=O)[O-])ccc2	9588	0	-3.086	286.281
S1CC(=O)NCC1	27540	0	-0.327	117.169
s1c(ccc1S(=O)(=O)c1ccccc1)C(=O)[O-]	2731	0	1.166	267.301
ClCCCCN(P(OCc1oc([N+](=O)[O-])cc1)(OC[C@@H]1O[C@@H](N2C=C(F)C(=O)NC2=O)C[C@@H]1O)=O)C	721385	1	0.069	554.848
O=C(N1CCCCC1)c1cc(cc(c1)C)C	67560	0	3.133	217.307
O1CC([C@H]2O[C@@]2(CC)C1=O)(C(OCC)=O)C(OCC)=O	118315	0	0.744	286.278
O(C)c1cc(C(=O)CC(=O)c2cccnc2)c(O)cc1	54648	0	1.745	271.268
Clc1ccc(cc1)\C=C\C(=O)C=1C(=NN(C)C(=O)C=1N1C[C@H]1C)c1ccccc1	634627	1	4.107	405.877
O(C)c1cc2CC[C@H]3[C@@H]4CC\C(=N/OCC[NH+]5CCCCC5)\[C@]4(CC[C@@H]3c2cc1)C	683880	1	3.765	411.6
Oc1n[nH]cc1C(OCC)=O	43546	0	0.775	156.139
O1[C@](CC(=C)C1=O)(COc1cc2OC(=O)C=C(c2cc1)C)C	668262	1	3.135	300.306
S=C(N1CCN(CC1)c1ncccc1)[N-]\N=C(/C)\c1c2ncccc2ccc1	363952	1	4.444	389.497
[Ru+2]1(Cl)(Cl)(Cl)(Cl)N2C=3C(C=CC=4C=3N1C=CC=4)=CC=C2	630123	1	2.448	423.087
O(C(C)(C)C)C(=O)C[NH+]1CC[NH+](CC[NH+](CC[NH+](CC1)CC(=O)N1CCN(CC1)C(OCc1ccccc1)=O)CC(OC(C)(C)C)=O)CC(=O)N1CCN(CC1)C(OCc1ccccc1)=O	696853	1	-2.993	925.165
S1(=O)(=O)CC\C(=C\c2cc(OC)c(OC)c(OC)c2)\C(=O)c2cc(ccc12)C	691566	1	3.699	402.461
o1cc(cc1)C(=O)[O-]	349941	0	-0.911	111.076
[Ir+3](Cl)(P(C)(C)=[CH2])(P(C)(C)=[CH2])(P(C)(C)=[CH2])n1c2c(cccc2)c(/C(=C/C(OC)=O)/C(OC)=O)[c-]1	635001	1	0.737	710.12
S(=O)(=O)(N)c1ccc(N)cc1	7618	0	-0.212	172.205
Clc1ccc(cc1)C(=O)c1cccc(C)c1O	11165	0	4.142	246.689
o1cccc1[C@@H]1O[C@H](CO)[C@@H](O)[C@H](O1)[C@H](O)CO	60746	0	-1.121	260.241
s1c2c(nc1N1C(N)=C(c3c(cc([N+](=O)[O-])cc3)C1=O)c1c3c(ccc1)cccc3)cccc2	694255	1	5.196	464.495
Fc1ccc(cc1)CCNC(=O)c1cc(ccc1O)\C=C\c1cc(O)ccc1O	716055	1	4.408	393.408
O1[C@H](CO)[C@@H](O)[C@@H](OCC(=O)N2CCC[C@H]2C(=O)N[C@@H](CCC(=O)NCCCCCNc2c3c([nH+]c4c2cccc4)cccc3[N+](=O)[O-])C(=O)N)[C@H](NC(=O)C)[C@@H]1OCc1ccccc1	677598	1	1.407	901.98
n1c2-c3c(Nc4c2c(c2c1cc(N)cc2)ccc4)cccc3	670693	1	3.845	283.327
O=C1c2c(n(Cc3ccccc3)c(C)c2-c2nc(ncc2)N)C(=O)c2c1cccc2	730933	1	4.07	394.425
Brc1cc2nnc(nc2cc1)N	252896	0	1.872	225.045
O=C1N(CCOC(=O)[C@H]2[C@H]3C=C[C@H](C3)[C@H]2C(OCCN2C(=O)[C@H]3[C@H]([C@H]4C=C[C@@H]3C4)C2=O)=O)C(=O)[C@@H]2[C@H]1[C@H]1C=C[C@@H]2C1	19685	0	0.647	560.594
S1C(C(=O)N)=C(N)N(CCC)C1=S	745291	0	1.311	217.312
O1[C@H](COC(=O)C)[C@H](OC(=O)C)[C@H](OC(=O)C)[C@H](OC(=O)C)[C@H]1O[C@@H]1N2N([C@@H](C=C1)C(OC)=O)C(=O)N(c1ccccc1)C2=O	676857	1	0.698	633.557
O=C(C=C=Nc1ccccc1)C(=O)N=C=Cc1ccccc1	43308	1	3.843	288.3
O(C)c1c2-n3c4c(C(=O)c2ccc1)c(NCC[NH+](CC)CC)ccc4nc3	660838	1	1.77	365.449
S(O[C@@H]1CC[C@H]2[C@H]3[C@H](CC[C@]12C)c1cc(OCC)c(O)cc1CC3)(O[C@@H]1CC[C@@H]2[C@@H]3[C@@H](CC[C@@]12C)c1cc(OCC)c(O)cc1CC3)=O	686560	1	8.93	678.918
O=[N+]([O-])c1ccc(cc1)-c1nc(c(n1-c1ccccc1)-c1ccccc1)-c1ccccc1	745924	1	7.075	417.459
O=C1NC(=O)N[C@]12CCC[C@@H]2C	32824	0	0.63	168.193
o1cccc1CNC(=O)Nc1ccc([N+](=O)[O-])cc1	45086	0	1.605	261.233
OC=1C=CC(=O)N([O-])C=1C	49271	0	-1.039	140.117
Clc1cc(O)nnc1O	163128	0	1.47	146.532
S\1c2c(NC(=O)/C/1=C/C(OC)=O)cccc2	266486	0	1.412	235.259
O1N=C(CC1=O)c1ccccc1	33592	0	1.475	161.157
O=C1c2n3c(nc2C(=O)C(NC(=O)C)=C1C)[C@H](OC(=O)C)CC3	676425	1	-0.174	317.297
S(=O)(=O)(n1c2c(cc1[C@@]1([C@H]3[NH2+]C[C@@H](C1)C=C3)C(OC)=O)cccc2)c1ccccc1	704242	1	2.49	423.505
O1[C@H](CC(OC)=CC1=O)CCc1ccccc1	112163	0	2.528	232.275
s1c2-n3nnc(c3NC(=O)c2c(C)c1C(OCC)=O)C(OCC)=O	742115	0	2.069	350.35
O1c2c(cc(O)cc2)C=C[C@@]12N(c1c(cccc1)C2(C)C)C	270086	1	4.449	293.36
[Hg](OC(=O)C)c1c(C)c(C)c(C)c(C)c1C	174176	1	3.996	406.871
O(C(=O)c1ccc(cc1)C(C)C)CCOCC	20055	0	3.097	236.307
O=CNc1cc(NC=O)ccc1C	8623	0	0.399	178.188
O(C)c1cc(NCC[C@H]2[NH2+]CCCC2)c2ncccc2c1OC	13275	1	1.172	316.418
[Fe+]12[SH]=C(N3CC4CCC(CC4)C3)[N-][N@H+]1[C-](C=1N2CN=CC=1)C	633274	1	1.684	361.287
S(C(=O)C(O)(c1ccccc1)c1ccccc1)CC[NH+](CC)CC	240573	0	2.448	344.491
O=C(N)C(CC[N@@H+]1CCCC1(C)C)(c1ccccc1)c1ccccc1	19964	0	2.17	337.478
S(CC(=O)c1ccccc1)c1n2c(nn1)N(C)C(=O)C(C#N)=C2c1occc1	744871	0	2.424	391.403
O(C[C@@H](O)C[NH2+]C(C)C)c1cc(O)c(O)cc1	269566	0	-0.083	242.291
N(C)(C)c1ccc(cc1)\C=C(/C#N)\c1ccccc1	636948	1	3.817	248.322
Oc1cc2c(cc1C(=O)Nc1cc([N+](=O)[O-])ccc1)cccc2	37168	1	3.175	308.288
S=C1N=C(Nc2nc[nH]c12)N	752	1	0.236	167.192
O(C(=O)c1n(cc(N)c1)C)C	742395	0	0.529	154.166
S(Sc1ccc(cc1[N+](=O)[O-])C(F)(F)F)c1ccc(cc1[N+](=O)[O-])C(F)(F)F	77119	0	6.212	444.329
S(C)C1=CC=C2c3c(cc(OC)c(OC)c3OC)CC[C@@H](NC(=O)c3ccc(OC(=O)C)cc3)C2=CC1=O	642315	1	4.034	535.608
OCc1[nH]c2c(n1)cccc2	18284	0	0.934	148.162
[Sn+4]12(OC(=O)[CH-][N@+]1(CC(O2)=O)CCO)([CH-]CCC)[CH-]CCC	628566	1	2.77	405.054
Clc1cc2c(C\C(=C/c3cc(OCC(=O)Nc4sc(C)c(n4)C)ccc3)\C2=O)cc1	745189	0	4.516	438.927
O(C(=O)C)c1cc(ccc1OC(=O)C)\C=C\C(O[C@H]1CCCC[C@@H]1OC(=O)\C=C\c1cc(OC(=O)C)c(OC(=O)C)cc1)=O	699166	1	4.626	608.589
ON(Cc1ccccc1)Cc1ccccc1	93968	0	2.892	213.275
[Au+]1([SH]=C2[N-]C=NC=3NCN1C2=3)P(C1CCCCC1)(C1CCCCC1)=C1CCCCC1	682440	1	4.752	629.572
O1[C@@]23[C@@H]([C@@H](CC[C@H](C2)C(=C)C1=O)CO[C@@H]1O[C@@H](CO)[C@@H](OC(=O)C(=C)[C@H]2C[C@@]4(O)[C@H]([C@H](CC2)CO)C(=O)C=C4C)[C@@H](O)[C@H]1O)C(=O)C=C3C	713791	1	1.515	686.743
BrC1=CN(C[C@]2(OC(=O)C(C2)=C)c2ccc(Br)cc2)C(=O)NC1=O	668259	1	2.435	456.085
S(O[C@@H]1C[C@H](O[C@H](C)[C@@H]1O)OC)(=O)(=O)c1ccc(cc1)C	109521	0	1.595	316.37
O1C=CCC[C@H]1OC[C@H](CCCC)CC	46584	0	3.594	212.328
O1[C@@](CC(=C)C1=O)(C)c1cc(Nc2nc3c(c4occc24)cccc3)ccc1	720567	1	5.149	370.401
[truncated: 2,556 more rows]
