# Supplementary material for: Identifying a novel anticancer agent with microtubule-stabilizing effects through computational cell-based bioactivity prediction models and bioassays
Source: Royal Society of Chemistry journal article supplement (doi:10.1039/c8ob02193g), 2019-01-01
Supplement: c8ob02193g3.xlsx [file c8ob02193g3.xlsx]

## Sheet: MCF-7(2059)
mol	STANDARD_TYPE	RELATION	STANDARD_VALUE	STANDARD_UNITS	ASSAY_TYPE	TARGET_TYPE	CELL_NAME	Weight
O(C)c1cc(ccc1)-c1nc(O)c2c(n1)cccc2	ED50	=	1.03063e+08	uM	F	CELL-LINE	MCF7	252.273
O(C)c1c(cccc1OC)-c1nc(O)c2c(n1)cccc2	ED50	=	7.08469e+07	uM	F	CELL-LINE	MCF7	282.299
O(C)c1cc(ccc1)-c1nc(O)c2cc(OC)ccc2n1	ED50	=	2.83387e+07	uM	F	CELL-LINE	MCF7	282.299
O(C)c1cc(ccc1OC)C1NC(=O)c2c(N1)cccc2	ED50	=	7.03445e+07	uM	F	CELL-LINE	MCF7	284.315
Clc1cc2c(nc(nc2O)-c2cc(OC)ccc2)cc1	ED50	=	6.20819e+07	uM	F	CELL-LINE	MCF7	286.718
Clc1cc2c(NC(NC2=O)c2cc(OC)ccc2)cc1	ED50	=	5.54143e+07	uM	F	CELL-LINE	MCF7	288.734
O(C)c1cc(ccc1)-c1nc(O)c2cc(N(C)C)ccc2n1	ED50	=	2.87802e+06	uM	F	CELL-LINE	MCF7	295.342
O(C)c1cc2c(nc(nc2O)-c2cc(OC)ccc2)cc1OC	ED50	=	3.84215e+07	uM	F	CELL-LINE	MCF7	312.325
O(C)c1cc(ccc1)-c1nc(O)c2cc(N3CCCC3)ccc2n1	ED50	=	684548	uM	F	CELL-LINE	MCF7	321.38
O(C)c1cc(ccc1)-c1nc(O)c2cc(N3CCCCC3)ccc2n1	ED50	=	2.53423e+07	uM	F	CELL-LINE	MCF7	335.407
O1CCN(CC1)c1cc2c(nc(nc2O)-c2cc(OC)ccc2)cc1	ED50	=	1.33381e+07	uM	F	CELL-LINE	MCF7	337.379
O(C)c1cc(ccc1)-c1nc(O)c2cc(N3CCC(CC3)C)ccc2n1	ED50	=	2.86177e+07	uM	F	CELL-LINE	MCF7	349.434
O=C(N(N=NC)C)C	IC50	=	37	uM	F	CELL-LINE	MCF7	115.136
O=C(NC)N1CC1C#N	IC50	=	27	uM	F	CELL-LINE	MCF7	125.131
FC1=CNC(=O)NC1=O	IC50	=	41	uM	F	CELL-LINE	MCF7	130.078
O=C(N(N=NC)C)NC	IC50	=	30	uM	F	CELL-LINE	MCF7	130.151
O=C(NCC)N1CC1C#N	IC50	=	29	uM	F	CELL-LINE	MCF7	139.158
O(CC)C(=O)N(N=NC)C	IC50	=	27	uM	F	CELL-LINE	MCF7	145.162
ClCC(S(=O)(=O)C)=C	ED50	=	6.5	uM	F	CELL-LINE	MCF7	154.617
ClCC[NH+](CCCl)C	IC50	=	70	uM	F	CELL-LINE	MCF7	157.064
ClCCN=NN(C(=O)C)C	IC50	=	15	uM	F	CELL-LINE	MCF7	163.608
OC1CCC(CC1[NH3+])C(C)(C)C	ED50	=	260	uM	F	CELL-LINE	MCF7	172.292
ClCCN=NN(C(=O)NC)C	IC50	=	14	uM	F	CELL-LINE	MCF7	178.623
OC1(C=CC(=O)C=C1)c1ncccc1	IC50	=	0.72	uM	F	CELL-LINE	MCF7	187.198
O=C(Nc1ccccc1)N1CC1C#N	IC50	=	2.9	uM	F	CELL-LINE	MCF7	187.202
O=C(Nc1cccnc1)N1CC1C#N	IC50	=	4.2	uM	F	CELL-LINE	MCF7	188.19
S1S(Sc2c1cccc2)=O	IC50	=	0.2092	uM	F	CELL-LINE	MCF7	188.295
s1cccc1C1(O)C=CC(=O)C=C1	IC50	=	0.57	uM	F	CELL-LINE	MCF7	192.238
O=C(NC1CCCCC1)N1CC1C#N	IC50	=	13	uM	F	CELL-LINE	MCF7	193.25
ClCCN=NN(C(OCC)=O)C	IC50	=	16	uM	F	CELL-LINE	MCF7	193.634
O=C1n2c(N=NN1C)c(nc2)C(=O)N	IC50	=	800	uM	F	CELL-LINE	MCF7	194.154
O(C(=O)CNC(=O)N1CC1C#N)CC	IC50	=	15	uM	F	CELL-LINE	MCF7	197.194
O=C(NCc1ccccc1)N1CC1C#N	IC50	=	7.4	uM	F	CELL-LINE	MCF7	201.229
O=C(NC(C)(C)C)\C=C\c1ccccc1	IC50	=	11.13	uM	F	CELL-LINE	MCF7	203.285
Fc1ccc(NC(=O)N2CC2C#N)cc1	IC50	=	1.9	uM	F	CELL-LINE	MCF7	205.192
P(OCC)(OCC)(=O)N(N=NC)C	IC50	=	20	uM	F	CELL-LINE	MCF7	209.186
SC1=Nc2n(C=C1)cnc2C(=S)N	IC50	=	16.2	uM	F	CELL-LINE	MCF7	210.285
SC1=Nc2n(CC1)cnc2C(=S)N	IC50	=	5.2	uM	F	CELL-LINE	MCF7	212.301
ClCCN(N=O)C(=O)NCCCl	IC50	=	4.5	uM	F	CELL-LINE	MCF7	214.052
O1CCOC12C=CC(=O)c1c2cccc1O	IC50	=	4.2	uM	F	CELL-LINE	MCF7	218.208
n1c2-c3c(Nc4c2c(ccc4)cc1)cccc3	IC50	=	0.83	uM	F	CELL-LINE	MCF7	218.259
s1c2c(cc1)C(=O)c1sccc1C2=O	IC50	=	0.48	uM	F	CELL-LINE	MCF7	220.272
Oc1ccc(cc1)\C=C(/C#N)\c1ncccc1	IC50	=	15	uM	F	CELL-LINE	MCF7	222.247
O=C([O-])\C(=C/c1ccccc1)\c1ccccc1	IC50	=	85.4	uM	F	CELL-LINE	MCF7	223.251
O=C(Nc1ccccc1)\C=C\c1ccccc1	IC50	=	5.24	uM	F	CELL-LINE	MCF7	223.275
Oc1ccccc1C(=O)\C=C\c1ccccc1	IC50	=	28.4	uM	F	CELL-LINE	MCF7	224.259
O=C1N(C2CCCC2)C(=O)NC1C(CC)C	IC50	=	67.4	uM	F	CELL-LINE	MCF7	224.304
s1c2c(nc1-c1ccc(N)cc1)cccc2	IC50	=	0.0008	uM	F	CELL-LINE	MCF7	226.303
FC1=CN([C@H]2O[C@H](C=C2)CO)C(=O)N=C1N	IC50	=	82.8	uM	F	CELL-LINE	MCF7	227.195
o1c2c(nc1C1(O)C=CC(=O)C=C1)cccc2	IC50	=	0.39	uM	F	CELL-LINE	MCF7	227.219
s1c2c(nc1-c1ccc(O)cc1)cccc2	IC50	=	53.4	uM	F	CELL-LINE	MCF7	227.287
s1c2c(nc1-c1cc(O)ccc1)cccc2	IC50	=	51.8	uM	F	CELL-LINE	MCF7	227.287
s1c2cc(O)ccc2nc1-c1ccccc1	IC50	=	27.3	uM	F	CELL-LINE	MCF7	227.287
FC1=CN([C@H]2O[C@H](C=C2)CO)C(=O)NC1=O	IC50	=	15.8	uM	F	CELL-LINE	MCF7	228.179
FC1=CN([C@H]2O[C@@H](C=C2)CO)C(=O)NC1=O	IC50	=	67.3	uM	F	CELL-LINE	MCF7	228.179
O=C(C)c1cc(NC(=O)N2CC2C#N)ccc1	IC50	=	3.6	uM	F	CELL-LINE	MCF7	229.239
FC1=CN([C@@H]2O[C@@H](C=C2)CO)C(=O)NC1O	IC50	=	54.1	uM	F	CELL-LINE	MCF7	230.195
Oc1cc(O)ccc1N=Nc1ccc(O)cc1	IC50	=	7	uM	F	CELL-LINE	MCF7	230.223
O=C(Nc1ccc([N+](=O)[O-])cc1)N1CC1C#N	IC50	=	3	uM	F	CELL-LINE	MCF7	232.199
O=C1c2c(nccc2)-c2nccc3c2c1ncc3	IC50	=	0.2	uM	F	CELL-LINE	MCF7	233.23
O=C1c2ncccc2-c2nccc3c2c1ncc3	IC50	=	0.6	uM	F	CELL-LINE	MCF7	233.23
O1[C@@H](N2C=CC(=NC2=O)N)[C@@H](C[C@H]1CO)C#N	IC50	=	299	uM	F	CELL-LINE	MCF7	236.231
OC1(C=CC(=O)C=C1)c1cc2c(cc1)cccc2	IC50	=	1.3	uM	F	CELL-LINE	MCF7	236.27
OC1(C=CC(=O)C=C1)c1c2c(ccc1)cccc2	IC50	=	0.78	uM	F	CELL-LINE	MCF7	236.27
OC1(C=CC(=O)C=C1)c1cc2c(nc1)cccc2	IC50	=	0.77	uM	F	CELL-LINE	MCF7	237.258
O1c2c(C(=O)C=C1c1ccccc1)c(N)ccc2	IC50	=	13	uM	F	CELL-LINE	MCF7	237.258
Oc1cc(nc2nc(ccc12)C)-c1cccnc1	ED50	=	1.2	uM	F	CELL-LINE	MCF7	237.262
O=C(Nc1c2c(ccc1)cccc2)N1CC1C#N	IC50	=	2	uM	F	CELL-LINE	MCF7	237.262
O=C(Nc1ccc(cc1)C)\C=C\c1ccccc1	IC50	=	3.26	uM	F	CELL-LINE	MCF7	237.302
O=C(Nc1cc(ccc1)C)\C=C\c1ccccc1	IC50	=	5.83	uM	F	CELL-LINE	MCF7	237.302
O=C(Nc1ccccc1C)\C=C\c1ccccc1	IC50	=	3.17	uM	F	CELL-LINE	MCF7	237.302
O=C1N(C2CCCCC2)C(=O)NC1C(CC)C	IC50	=	94.3	uM	F	CELL-LINE	MCF7	238.331
Oc1cc(O)ccc1C(=O)\C=C\c1ccccc1	IC50	=	16.3	uM	F	CELL-LINE	MCF7	240.258
O=C1c2c(cccc2)C(=O)c2nc(n(c12)CC)C	GI50	=	0.67608	uM	F	CELL-LINE	MCF7	240.262
s1c2c(nc1-c1cc(C)c(N)cc1)cccc2	GI50	=	0.03162	uM	F	CELL-LINE	MCF7	240.33
[C@H]12[C@H]3[C@H](CC[C@@]1(CCC2)C)c1c(CC3)cccc1	EC50	=	0.201	uM	F	CELL-LINE	MCF7	240.39
ClCCNC(=O)Nc1ccc(cc1)C(C)C	IC50	=	4.7	uM	F	CELL-LINE	MCF7	240.734
O=C1NC(=O)N(C=C1C)[C@@H]1C[C@@H](N(O)C1)CO	IC50	=	0.08	uM	F	CELL-LINE	MCF7	241.247
Fc1ccc(NC(=O)\C=C\c2ccccc2)cc1	IC50	=	2.56	uM	F	CELL-LINE	MCF7	241.265
Fc1ccccc1NC(=O)\C=C\c1ccccc1	IC50	=	2.38	uM	F	CELL-LINE	MCF7	241.265
SC1=Nc2n(CC1)cnc2C(=S)OCC	IC50	=	15.8	uM	F	CELL-LINE	MCF7	241.339
O1[C@H](CO)[C@@H](NO)C[C@@H]1N1C=CC(=NC1=O)N	IC50	=	30.3	uM	F	CELL-LINE	MCF7	242.235
s1c2cc(O)ccc2nc1-c1ccc(N)cc1	IC50	=	21.6	uM	F	CELL-LINE	MCF7	242.302
O1[C@H](CO)[C@@H](O)[C@H](O)[C@@H]1N1C=CC(=NC1=O)N	IC50	=	1.03	uM	F	CELL-LINE	MCF7	243.219
s1c2c(nc1C1(O)C=CC(=O)C=C1)cccc2	IC50	=	0.35	uM	F	CELL-LINE	MCF7	243.286
s1c2cc(O)ccc2nc1-c1ccc(O)cc1	IC50	=	25	uM	F	CELL-LINE	MCF7	243.286
s1c2c(nc1-c1ccc(O)cc1)cc(O)cc2	IC50	=	41.4	uM	F	CELL-LINE	MCF7	243.286
s1c2cc(O)ccc2nc1-c1cc(O)ccc1	IC50	=	2.7	uM	F	CELL-LINE	MCF7	243.286
O=C1N(C2CCCC2)C(=O)NC1c1ccccc1	IC50	=	22	uM	F	CELL-LINE	MCF7	244.294
o1c(ccc1[N+](=O)[O-])\C=C(/C#N)\c1[nH]nc(n1)C	IC50	=	1.47	uM	F	CELL-LINE	MCF7	245.198
O(CC1CCC=CC1)c1nc(nc2nc[nH]c12)N	GI50	=	37	uM	F	CELL-LINE	MCF7	245.286
O1CCCOC12C=CC(=O)c1c2cccc1OC	IC50	=	4.4	uM	F	CELL-LINE	MCF7	246.262
O1[C@@H]2[C@@H](CC[C@@H]([C@@H]3C=CC(=O)[C@@]23C)C)C(=C)C1=O	GI50	=	3.9	uM	F	CELL-LINE	MCF7	246.306
O=C1N(Cc2ccccc2)C(=O)NC1C(CC)C	IC50	=	29.5	uM	F	CELL-LINE	MCF7	246.31
[nH]1c2c(c3c1cccc3)c(c1c(ccnc1)c2C)C	GI50	=	0.71	uM	F	CELL-LINE	MCF7	246.313
O1C2=CC(=O)c3c(C2=Nc2c1cccc2)cccc3	IC50	=	3.2	uM	F	CELL-LINE	MCF7	247.253
O(CC1CCCCC1)c1nc(nc2[nH]cnc12)N	GI50	=	20	uM	F	CELL-LINE	MCF7	247.302
O1C2=CC(=O)c3ncccc3C2=Nc2c1cccc2	IC50	=	0.23	uM	F	CELL-LINE	MCF7	248.241
O1C2=CC(=O)c3c(C2=Nc2c1cccc2)ccnc3	IC50	=	15.2	uM	F	CELL-LINE	MCF7	248.241
O1C2=CC(=O)c3c(nccc3)C2=Nc2c1cccc2	IC50	=	0.065	uM	F	CELL-LINE	MCF7	248.241
O1C2=CC(=O)c3c(C2=Nc2c1cccc2)cncc3	IC50	=	13.8	uM	F	CELL-LINE	MCF7	248.241
S(CCO)C1=C(C)C(=O)c2c(cccc2)C1=O	IC50	=	5.19	uM	F	CELL-LINE	MCF7	248.302
ClCCNC(=O)Nc1cc2c(cc1)cccc2	IC50	=	7.3	uM	F	CELL-LINE	MCF7	248.713
Oc1c-2c(ncc1)C(=O)c1nccc3c1c-2ncc3	IC50	=	5	uM	F	CELL-LINE	MCF7	249.229
O1c2c(CCC1(C(=O)[O-])C)c(C)c(O)c(C)c2C	IC50	=	1461	uM	F	CELL-LINE	MCF7	249.286
s1c2c(nc1-c1cc(C#C)c(N)cc1)cccc2	GI50	=	0.049	uM	F	CELL-LINE	MCF7	250.325
O(C)c1cc2nc(O)c(cc2cc1)-c1ccccc1	IC50	=	10	uM	F	CELL-LINE	MCF7	251.285
O(C)c1c2nc(O)c(cc2ccc1)-c1ccccc1	IC50	=	10	uM	F	CELL-LINE	MCF7	251.285
s1c2c(nc1-c1cc(C#N)c(N)cc1)cccc2	GI50	=	0.58	uM	F	CELL-LINE	MCF7	251.313
s1cccc1\C=C(/C#N)\c1[nH]c2c(n1)cccc2	IC50	=	11.23	uM	F	CELL-LINE	MCF7	251.313
O1[C@H](CO)[C@@H](O)[C@H](C#N)[C@@H]1N1C=CC(=NC1=O)N	IC50	=	1.75	uM	F	CELL-LINE	MCF7	252.23
O(C)c1cc(ccc1O)\C=C(/C#N)\c1ncccc1	IC50	=	0.7	uM	F	CELL-LINE	MCF7	252.273
O1c2c(C(=O)C=C1c1ccc(N)cc1)c(N)ccc2	IC50	=	0.0098	uM	F	CELL-LINE	MCF7	252.273
O1c2c(C(=O)C=C1c1cc(N)ccc1)c(N)ccc2	IC50	=	27	uM	F	CELL-LINE	MCF7	252.273
n1c(N)c2nc(Nc3ccccc3)ccc2nc1N	GI50	=	6.45	uM	F	CELL-LINE	MCF7	252.281
Clc1ccc(N([O-])C(=O)C2CCCCC2)cc1	IC50	=	80	uM	F	CELL-LINE	MCF7	252.721
ClC[C@H](NC(=O)Nc1cc2CCCc2cc1)C	IC50	=	11	uM	F	CELL-LINE	MCF7	252.745
O1c2c(C(=O)C=C1c1ccc(O)cc1)c(N)ccc2	IC50	=	1.5	uM	F	CELL-LINE	MCF7	253.257
O(C)c1ccc(NC(=O)\C=C\c2ccccc2)cc1	IC50	=	2.34	uM	F	CELL-LINE	MCF7	253.301
O(C)c1ccccc1NC(=O)\C=C\c1ccccc1	IC50	=	2.01	uM	F	CELL-LINE	MCF7	253.301
O1c2c(ccc(O)c2O)C(=O)C=C1c1ccccc1	IC50	=	27.5	uM	F	CELL-LINE	MCF7	254.241
O(C)c1cccc(O)c1C(=O)\C=C\c1ccccc1	IC50	=	18.3	uM	F	CELL-LINE	MCF7	254.285
O1c2c(ccc(OC)c2)C(=O)CC1c1ccccc1	IC50	=	35.7	uM	F	CELL-LINE	MCF7	254.285
O(C)c1cc(C(=O)\C=C\c2ccccc2)c(O)cc1	IC50	=	29.2	uM	F	CELL-LINE	MCF7	254.285
O(C)c1cc(O)c(cc1)C(=O)\C=C\c1ccccc1	IC50	=	26.8	uM	F	CELL-LINE	MCF7	254.285
O1c2c(C(=O)CC1c1ccccc1)c(OC)ccc2	IC50	=	35.7	uM	F	CELL-LINE	MCF7	254.285
ClCCNC(=O)Nc1ccc(cc1)C(C)(C)C	IC50	=	11	uM	F	CELL-LINE	MCF7	254.761
ClC[C@@H](NC(=O)Nc1ccc(cc1)C(C)C)C	IC50	=	2.9	uM	F	CELL-LINE	MCF7	254.761
ClCCNC(=O)Nc1ccc(cc1)C(CC)C	IC50	=	5.2	uM	F	CELL-LINE	MCF7	254.761
FC(F)(F)c1ccc(NC(=O)N2CC2C#N)cc1	IC50	=	1.5	uM	F	CELL-LINE	MCF7	255.199
Oc1c(cccc1O)\C=C(/C(=O)[O-])\c1ccccc1	IC50	=	96.5	uM	F	CELL-LINE	MCF7	255.249
Clc1cc(NC(=O)N2CC2C#N)ccc1Cl	IC50	=	4.6	uM	F	CELL-LINE	MCF7	256.092
Clc1cc(Cl)ccc1NC(=O)N1CC1C#N	IC50	=	0.9	uM	F	CELL-LINE	MCF7	256.092
Oc1c(O)c(O)ccc1C(=O)\C=C\c1ccccc1	IC50	=	22.2	uM	F	CELL-LINE	MCF7	256.257
s1c2c(cc1C(=O)C)C(=O)c1c(cccc1)C2=O	GI50	=	1.69824	uM	F	CELL-LINE	MCF7	256.281
s1c2c(c(c1)C(=O)C)C(=O)c1c(cccc1)C2=O	GI50	=	2.0893	uM	F	CELL-LINE	MCF7	256.281
s1c2cc(O)ccc2nc1-c1cc(C)c(N)cc1	GI50	=	56.2341	uM	F	CELL-LINE	MCF7	256.329
s1c(ccc1C)-c1nc2ncc(cc2c(O)c1)C	ED50	=	1.1	uM	F	CELL-LINE	MCF7	256.329
s1ccc(C)c1-c1nc2ncc(cc2c(O)c1)C	ED50	=	1.1	uM	F	CELL-LINE	MCF7	256.329
s1c2c(nc1-c1cc(C)c(N)cc1)cccc2O	IC50	=	90.8	uM	F	CELL-LINE	MCF7	256.329
s1c2c(nc1-c1cc(CO)c(N)cc1)cccc2	IC50	=	0.006	uM	F	CELL-LINE	MCF7	256.329
s1c2c(nc1-c1cc(C)c(N)cc1)cc(O)cc2	IC50	=	78.7	uM	F	CELL-LINE	MCF7	256.329
O[C@H]1CC[C@H]2[C@H]3[C@H](CC[C@]12C)c1c(CC3)cccc1	EC50	=	0.000316	uM	F	CELL-LINE	MCF7	256.389
Oc1cc2CC[C@H]3[C@@H]4CCC[C@]4(CC[C@@H]3c2cc1)C	EC50	=	0.000118	uM	F	CELL-LINE	MCF7	256.389
s1c2c(nc1C1(OC)C=CC(=O)C=C1)cccc2	IC50	=	0.56	uM	F	CELL-LINE	MCF7	257.313
Clc1ccc(cc1)\C=C(/C(=O)[O-])\c1ccccc1	IC50	=	34	uM	F	CELL-LINE	MCF7	257.696
Clc1ccc(NC(=O)\C=C\c2ccccc2)cc1	IC50	=	3.49	uM	F	CELL-LINE	MCF7	257.72
Clc1cc(NC(=O)\C=C\c2ccccc2)ccc1	IC50	=	4.37	uM	F	CELL-LINE	MCF7	257.72
Clc1ccccc1NC(=O)\C=C\c1ccccc1	IC50	=	2.37	uM	F	CELL-LINE	MCF7	257.72
O1[C@H](CO)[C@@H](NO)[C@@H](O)[C@@H]1N1C=CC(=NC1=O)N	IC50	=	6.91	uM	F	CELL-LINE	MCF7	258.234
O1[C@H](CO)[C@@H](O)[C@@H](NO)[C@@H]1N1C=CC(=NC1=O)N	IC50	=	1.3	uM	F	CELL-LINE	MCF7	258.234
O1C(CO)[C@@H](O)[C@@H](NO)C1N1C=CC(=NC1=O)N	IC50	=	1.3	uM	F	CELL-LINE	MCF7	258.234
Fc1cc(NC(=O)\C=C\c2ccccc2)cc(F)c1	IC50	=	4.65	uM	F	CELL-LINE	MCF7	259.255
Fc1cc(F)ccc1NC(=O)\C=C\c1ccccc1	IC50	=	4.14	uM	F	CELL-LINE	MCF7	259.255
O(C(=O)c1ccc(NC(=O)N2CC2C#N)cc1)CC	IC50	=	2.3	uM	F	CELL-LINE	MCF7	259.265
s1c2c(nc1-c1ccc(O)cc1)c(O)cc(O)c2	IC50	=	33.3	uM	F	CELL-LINE	MCF7	259.285
s1c2cc(O)c(O)cc2nc1-c1ccc(O)cc1	IC50	=	8.4	uM	F	CELL-LINE	MCF7	259.285
s1c2cc(O)ccc2nc1-c1cc(O)c(O)cc1	IC50	=	17.6	uM	F	CELL-LINE	MCF7	259.285
[n+]12c3-c4c(Nc5c3c(cc1CCC2)ccc5)cccc4	IC50	=	0.15	uM	F	CELL-LINE	MCF7	259.332
s1cc(nc1[C@@H]1O[C@H](CO)[C@@H](O)[C@H]1O)C(=O)N	IC50	=	8.49	uM	F	CELL-LINE	MCF7	260.27
Oc1cc(nc2c1ccc1[nH]ccc12)-c1ccccc1	IC50	=	4	uM	F	CELL-LINE	MCF7	260.296
s1c(ccc1[N+](=O)[O-])\C=C(/C#N)\c1[nH]nc(n1)C	IC50	=	0.38	uM	F	CELL-LINE	MCF7	261.265
O1C2=CC(=O)c3ncccc3C2=Nc2c1cccc2C	IC50	=	0.5	uM	F	CELL-LINE	MCF7	262.268
O1C2=CC(=O)c3ncccc3C2=Nc2cc(ccc12)C	IC50	=	0.6	uM	F	CELL-LINE	MCF7	262.268
O1c2c(N=C3C1=CC(=O)c1ncccc13)cccc2C	IC50	=	1.2	uM	F	CELL-LINE	MCF7	262.268
O1C2=CC(=O)c3ncccc3C2=Nc2c1cc(cc2)C	IC50	=	0.7	uM	F	CELL-LINE	MCF7	262.268
O1c2c(C(=O)C=C1c1ccc(cc1)C#N)c(N)ccc2	IC50	=	94	uM	F	CELL-LINE	MCF7	262.268
S(CCCO)C1=C(C)C(=O)c2c(cccc2)C1=O	IC50	=	5.16	uM	F	CELL-LINE	MCF7	262.329
S(CC(O)C)C1=C(C)C(=O)c2c(cccc2)C1=O	IC50	=	4.61	uM	F	CELL-LINE	MCF7	262.329
ClC[C@H](NC(=O)Nc1cc2c(cc1)cccc2)C	IC50	=	6	uM	F	CELL-LINE	MCF7	262.74
FC1(F)[C@H](O)[C@H](O[C@H]1N1C=CC(=NC1=O)N)CO	IC50	=	1.66	uM	F	CELL-LINE	MCF7	263.2
O(C)c1c2c3c(nc1)C(=O)c1c(nccc1)-c3ncc2	IC50	=	0.4	uM	F	CELL-LINE	MCF7	263.256
O(C)c1nc-2c(cc1)C(=O)c1nccc3c1c-2ncc3	IC50	=	5	uM	F	CELL-LINE	MCF7	263.256
O(C)c1c2c(ncc1)-c1nccc3c1c(ncc3)C2=O	IC50	=	0.6	uM	F	CELL-LINE	MCF7	263.256
O(C)c1nc2c(-c3nccc4c3c(ncc4)C2=O)cc1	IC50	=	5	uM	F	CELL-LINE	MCF7	263.256
O(C)c1c-2c(ncc1)C(=O)c1nccc3c1c-2ncc3	IC50	=	0.2	uM	F	CELL-LINE	MCF7	263.256
O(C)c1c2c3c(nc1)C(=O)c1ncccc1-c3ncc2	IC50	=	0.06	uM	F	CELL-LINE	MCF7	263.256
S1C2=CC(=O)c3ncccc3C2=Nc2c1cccc2	IC50	=	0.65	uM	F	CELL-LINE	MCF7	264.308
O=C(Nc1ccc(cc1)C(C)C)\C=C\c1ccccc1	IC50	=	5.39	uM	F	CELL-LINE	MCF7	265.356
O1c2c(C(=O)C=C1c1ccc(NC)cc1)c(N)ccc2	IC50	=	0.0054	uM	F	CELL-LINE	MCF7	266.3
O=C1N(Cc2ccccc2)C(=O)NC1c1ccccc1	IC50	=	3.3	uM	F	CELL-LINE	MCF7	266.3
n1c(N)c2nc(N(C)c3ccccc3)ccc2nc1N	GI50	=	0.14	uM	F	CELL-LINE	MCF7	266.308
s1cccc1-c1nc2c(ccc3[nH]ccc23)c(O)c1	IC50	=	30	uM	F	CELL-LINE	MCF7	266.324
Clc1ccc(N([O-])C(=O)CCC2CCCC2)cc1	IC50	=	10	uM	F	CELL-LINE	MCF7	266.748
Clc1ccc(N([O-])C(=O)CC2CCCCC2)cc1	IC50	=	10	uM	F	CELL-LINE	MCF7	266.748
O1[C@H](CO)[C@@](O)(C#C)[C@@H](O)[C@@H]1N1C=CC(=NC1=O)N	IC50	=	0.069	uM	F	CELL-LINE	MCF7	267.241
O1[C@H](CO)[C@@H](N=[N+]=[N-])C[C@@H]1N1C=C(C)C(=O)NC1=O	IC50	=	0.008	uM	F	CELL-LINE	MCF7	267.245
O1c2c(C(=O)C=C1c1ccc(OC)cc1)c(N)ccc2	IC50	=	12	uM	F	CELL-LINE	MCF7	267.284
O(CC(=C)c1ccccc1)c1nc(nc2nc[nH]c12)N	GI50	=	28	uM	F	CELL-LINE	MCF7	267.292
O(CC)c1ccc(NC(=O)\C=C\c2ccccc2)cc1	IC50	=	3.3	uM	F	CELL-LINE	MCF7	267.328
O(CC)c1ccccc1NC(=O)\C=C\c1ccccc1	IC50	=	2.43	uM	F	CELL-LINE	MCF7	267.328
Clc1c2c(ncc1)-c1nccc3c1c(ncc3)C2=O	IC50	=	0.6	uM	F	CELL-LINE	MCF7	267.675
O1[C@H](CO)[C@@](O)(C#C)[C@@H](O)[C@@H]1N1C=CC(=O)NC1=O	IC50	=	0.2	uM	F	CELL-LINE	MCF7	268.225
O1c2c(C(=O)C=C1c1ccc(N)cc1)c(N)ccc2O	IC50	=	5.3	uM	F	CELL-LINE	MCF7	268.272
s1c2c(nc1-c1cc(C#C)c(N)cc1)cc(F)cc2	GI50	=	0.011	uM	F	CELL-LINE	MCF7	268.315
s1c2cc(F)ccc2nc1-c1cc(C#C)c(N)cc1	GI50	=	0.11	uM	F	CELL-LINE	MCF7	268.315
s1c2c(nc1-c1cc(C#C)c(N)cc1)c(F)ccc2	GI50	=	0.11	uM	F	CELL-LINE	MCF7	268.315
Oc1cc2c(c3CC[C@]4([C@@H](CC[C@@H]4O)c3cc2)C)cc1	EC50	=	1.25e-05	uM	F	CELL-LINE	MCF7	268.356
Oc1ccc(cc1)/C(=C(\CC)/c1ccc(O)cc1)/CC	IC50	=	5	uM	F	CELL-LINE	MCF7	268.356
ClC[C@H](NC(=O)Nc1ccc(cc1)C(CC)C)C	IC50	=	4.8	uM	F	CELL-LINE	MCF7	268.788
ClC[C@@H](NC(=O)Nc1ccc(cc1)C(C)(C)C)C	IC50	=	84	uM	F	CELL-LINE	MCF7	268.788
ClC[C@@H](NC(=O)Nc1ccc(cc1)C(C)C)CC	IC50	=	72	uM	F	CELL-LINE	MCF7	268.788
ClC[C@@H](NC(=O)Nc1ccc(cc1)C(CC)C)C	IC50	=	63	uM	F	CELL-LINE	MCF7	268.788
ClC[C@H](NC(=O)Nc1ccc(cc1)C(C)C)CC	IC50	=	55	uM	F	CELL-LINE	MCF7	268.788
ClC[C@H](NC(=O)Nc1ccc(cc1)C(C)(C)C)C	IC50	=	10	uM	F	CELL-LINE	MCF7	268.788
FC1=CN([C@@H]2O[C@@H](C=C2)CO)C(=O)N=C1NC(=O)C	IC50	=	62.9	uM	F	CELL-LINE	MCF7	269.232
Oc1nc2c(cc1-c1ccc(O)cc1)c(O)cc(O)c2	IC50	=	10	uM	F	CELL-LINE	MCF7	269.256
s1c2cc(F)ccc2nc1-c1cc(C#N)c(N)cc1	GI50	=	0.82	uM	F	CELL-LINE	MCF7	269.303
s1c2c(nc1-c1cc(C#N)c(N)cc1)c(F)ccc2	GI50	=	0.18	uM	F	CELL-LINE	MCF7	269.303
s1c2c(nc1-c1cc(C#N)c(N)cc1)cc(F)cc2	GI50	=	0.0057	uM	F	CELL-LINE	MCF7	269.303
[nH+]1c2c3c(-c4c(Nc3c3c1cccc3)cccc4)ccc2	IC50	=	0.27	uM	F	CELL-LINE	MCF7	269.327
O1C=C(C(=O)c2c1cc(O)cc2O)c1ccc(O)cc1	IC50	=	77	uM	F	CELL-LINE	MCF7	270.24
O1c2c(C(=O)C=C1c1ccc(O)cc1)c(O)cc(O)c2	IC50	=	95	uM	F	CELL-LINE	MCF7	270.24
O1c2c(cccc2)\C(=C/c2cc(O)c(O)c(O)c2)\C1=O	GI50	=	26	uM	F	CELL-LINE	MCF7	270.24
O1c2c(cc(O)cc2)\C(=C/c2cc(O)c(O)cc2)\C1=O	GI50	=	29	uM	F	CELL-LINE	MCF7	270.24
Fc1c2OC(=CC(=O)c2c(N)cc1)c1ccc(N)cc1	IC50	=	0.0069	uM	F	CELL-LINE	MCF7	270.263
Fc1ccc2OC(=CC(=O)c2c1N)c1ccc(N)cc1	IC50	=	0.0044	uM	F	CELL-LINE	MCF7	270.263
O(C)c1cc(OC)c(OC)cc1\C=C\c1ccccc1	ED50	=	8.5	uM	F	CELL-LINE	MCF7	270.328
O(C)c1c(OC)cc(cc1OC)\C=C/c1ccccc1	ED50	=	0.25	uM	F	CELL-LINE	MCF7	270.328
O(C)c1cc(cc(OC)c1)\C=C/c1ccc(OC)cc1	ED50	=	1.6	uM	F	CELL-LINE	MCF7	270.328
O(C)c1cc(cc(OC)c1)\C=C\c1ccc(OC)cc1	ED50	=	9.7	uM	F	CELL-LINE	MCF7	270.328
Oc1cc2CC[C@@H]3[C@@H]4CC[C@H](O)[C@]4(CC=C3c2cc1)C	EC50	=	9.9e-05	uM	F	CELL-LINE	MCF7	270.372
Oc1cc2CC[C@H]3[C@@H]4CCC(=O)[C@]4(CC[C@@H]3c2cc1)C	EC50	=	7.72e-05	uM	F	CELL-LINE	MCF7	270.372
Oc1cc2CC=C3[C@@H]4CC[C@H](O)[C@]4(CC[C@@H]3c2cc1)C	EC50	=	1.54e-06	uM	F	CELL-LINE	MCF7	270.372
Oc1cc2C=C[C@@H]3[C@@H]4CC[C@H](O)[C@]4(CC[C@@H]3c2cc1)C	EC50	=	4.19e-06	uM	F	CELL-LINE	MCF7	270.372
O(C)c1c(OC)cc(cc1OC)\C=C/c1cccnc1	ED50	=	14.7	uM	F	CELL-LINE	MCF7	271.316
O(C)c1c(OC)cc(cc1OC)\C=C/c1ccncc1	ED50	=	17	uM	F	CELL-LINE	MCF7	271.316
s1c2c(nc1C1(OCC)C=CC(=O)C=C1)cccc2	IC50	=	0.51	uM	F	CELL-LINE	MCF7	271.34
O[C@H]1CC[C@H]2[C@H]3[C@@H](c4c(CC3)cccc4N)CC[C@]12C	EC50	=	0.0284	uM	F	CELL-LINE	MCF7	271.404
O[C@H]1CC[C@H]2[C@H]3[C@H](CC[C@]12C)c1cc(N)ccc1CC3	EC50	=	0.000127	uM	F	CELL-LINE	MCF7	271.404
O[C@H]1CC[C@H]2[C@H]3[C@H](CC[C@]12C)c1c(cc(N)cc1)CC3	EC50	=	0.0015	uM	F	CELL-LINE	MCF7	271.404
O[C@H]1CC[C@H]2[C@H]3[C@H](CC[C@]12C)c1c(CC3)c(N)ccc1	EC50	=	0.002	uM	F	CELL-LINE	MCF7	271.404
Oc1cc2CC[C@H]3[C@@H]4CC[C@H](O)[C@]4(CC[C@@H]3c2cc1)C	IC50	=	32	uM	F	CELL-LINE	MCF7	272.388
Oc1cc2CC[C@H]3[C@@H]4C[C@@H](O)C[C@]4(CC[C@@H]3c2cc1)C	EC50	=	0.000237	uM	F	CELL-LINE	MCF7	272.388
Oc1c2[C@@H]3[C@H]([C@@H]4CC[C@H](O)[C@]4(CC3)C)CCc2ccc1	EC50	=	0.00159	uM	F	CELL-LINE	MCF7	272.388
Oc1c2CC[C@H]3[C@@H]4CC[C@H](O)[C@]4(CC[C@@H]3c2ccc1)C	EC50	=	0.00476	uM	F	CELL-LINE	MCF7	272.388
Oc1cc2[C@@H]3[C@H]([C@@H]4CC[C@H](O)[C@]4(CC3)C)CCc2cc1	EC50	=	3.3e-05	uM	F	CELL-LINE	MCF7	272.388
Oc1cc2CC[C@H]3[C@@H]4CC[C@@H](O)[C@]4(CC[C@@H]3c2cc1)C	EC50	=	0.000382	uM	F	CELL-LINE	MCF7	272.388
O1C2=CC(=O)c3ncccc3C2=Nc2cc(ccc12)C#N	IC50	=	0.01	uM	F	CELL-LINE	MCF7	273.251
O(C)c1cc(cc(OC)c1)CNc1ccc(OC)cc1	ED50	=	6.08	uM	F	CELL-LINE	MCF7	273.332
Oc1cc(nc2c1ccc1n(ccc12)C)-c1ccccc1	IC50	=	4	uM	F	CELL-LINE	MCF7	274.323
[NH2+](CC1CC1)CCC[NH2+]CCC[NH2+]CCC[NH2+]CC	IC50	=	1.1	uM	F	CELL-LINE	MCF7	274.497
s1c2c(nc1-c1cc(O)c(O)cc1)c(O)cc(O)c2	IC50	=	41.3	uM	F	CELL-LINE	MCF7	275.284
s1c2cc(O)c(O)cc2nc1-c1cc(O)c(O)cc1	IC50	=	5.1	uM	F	CELL-LINE	MCF7	275.284
Oc1cc(nc2c1ccc1[nH]ccc12)-c1cc(N)ccc1	IC50	=	50	uM	F	CELL-LINE	MCF7	275.311
S(CCCCO)C1=C(C)C(=O)c2c(cccc2)C1=O	IC50	=	5.78	uM	F	CELL-LINE	MCF7	276.356
Clc1cc(ccc1N)-c1sc2cc(O)ccc2n1	IC50	=	54.5	uM	F	CELL-LINE	MCF7	276.747
Clc1cc(ccc1N)-c1sc2c(n1)c(O)ccc2	IC50	=	61.4	uM	F	CELL-LINE	MCF7	276.747
Clc1cc(ccc1N)-c1sc2c(n1)cc(O)cc2	IC50	=	60.6	uM	F	CELL-LINE	MCF7	276.747
Fc1c(F)cc(NC(=O)\C=C\c2ccccc2)cc1F	IC50	=	2.89	uM	F	CELL-LINE	MCF7	277.245
O=C1c2nccc3c2c(ncc3)-c2c1[nH+]ccc2N(C)C	IC50	=	0.9	uM	F	CELL-LINE	MCF7	277.307
o1c(ccc1[N+](=O)[O-])\C=C(/C#N)\c1[nH]c2c(n1)cccc2	IC50	=	0.65	uM	F	CELL-LINE	MCF7	280.243
O1c2c(cc(N)cc2)C(=O)C=C1c1cc(N(C)C)ccc1	IC50	=	13	uM	F	CELL-LINE	MCF7	280.327
O1c2c(cccc2N)C(=O)C=C1c1ccc(N(C)C)cc1	IC50	=	2	uM	F	CELL-LINE	MCF7	280.327
O1c2c(C(=O)C=C1c1ccc(N(C)C)cc1)c(N)ccc2	IC50	=	0.005	uM	F	CELL-LINE	MCF7	280.327
O1c2c(C(=O)C=C1c1ccc(NCC)cc1)c(N)ccc2	IC50	=	0.0017	uM	F	CELL-LINE	MCF7	280.327
O1c2c(cc(N)cc2)C(=O)C=C1c1ccc(N(C)C)cc1	IC50	=	0.035	uM	F	CELL-LINE	MCF7	280.327
O1c2c(ccc(N)c2)C(=O)C=C1c1ccc(N(C)C)cc1	IC50	=	6.9	uM	F	CELL-LINE	MCF7	280.327
Oc1ccc(cc1)C(=C1CCCCC1)c1ccc(O)cc1	EC50	=	0.0045	uM	F	CELL-LINE	MCF7	280.367
Clc1ccc(N([O-])C(=O)CCC2CCCCC2)cc1	IC50	=	20	uM	F	CELL-LINE	MCF7	280.775
O1[C@H](CO)[C@](O)(C)[C@@H](O)[C@@H]1n1c2ncnc(N)c2nc1	IC50	=	17.5	uM	F	CELL-LINE	MCF7	281.272
O(C)c1cc(OC)cc2nc(O)c(cc12)-c1ccccc1	IC50	=	10	uM	F	CELL-LINE	MCF7	281.311
O(C)c1c2nc(O)c(cc2ccc1)-c1ccc(OC)cc1	IC50	=	10	uM	F	CELL-LINE	MCF7	281.311
s1c2c(nc1C1(OCC#C)C=CC(=O)C=C1)cccc2	IC50	=	0.28	uM	F	CELL-LINE	MCF7	281.335
O=C1[C@H](C[C@@H](C[C@H]1[C@H](O)CC1CC(=O)NC(=O)C1)C)C	IC50	=	1.5	uM	F	CELL-LINE	MCF7	281.352
N#C\C(=C(/c1ccccc1)\c1ccccc1)\c1ccccc1	EC50	=	0.028	uM	F	CELL-LINE	MCF7	281.358
O1c2c(C(=O)C=C1c1ccc(N)cc1)c(N)ccc2OC	IC50	=	19	uM	F	CELL-LINE	MCF7	282.299
Clc1cc2N=C3C(Oc2cc1)=CC(=O)c1ncccc13	IC50	=	0.6	uM	F	CELL-LINE	MCF7	282.686
ClC[C@@H](NC(=O)Nc1ccc(cc1)C(CC)C)CC	IC50	=	51	uM	F	CELL-LINE	MCF7	282.815
ClC[C@H](NC(=O)Nc1ccc(cc1)C(CC)C)CC	IC50	=	38	uM	F	CELL-LINE	MCF7	282.815
ClC[C@@H](NC(=O)Nc1ccc(cc1)C(C)(C)C)CC	IC50	=	60	uM	F	CELL-LINE	MCF7	282.815
ClC[C@H](NC(=O)Nc1ccc(cc1)C(C)(C)C)CC	IC50	=	52	uM	F	CELL-LINE	MCF7	282.815
Oc1cc(O)cc2N(C)C(=O)C(=Cc12)c1ccc(O)cc1	IC50	=	10	uM	F	CELL-LINE	MCF7	283.283
O=C1c2ncccc2-c2nc3c(c4c2c1ncc4)cccc3	IC50	=	0.0009	uM	F	CELL-LINE	MCF7	283.29
O=C1c2c(nccc2)-c2nccc3c2c1nc1c3cccc1	IC50	=	0.07	uM	F	CELL-LINE	MCF7	283.29
O(C)c1c(cccc1OC)\C=C(/C(=O)[O-])\c1ccccc1	IC50	=	3.9	uM	F	CELL-LINE	MCF7	283.303
[nH+]1c2c3c(-c4cc(ccc4Nc3c3c1cccc3)C)ccc2	IC50	=	0.18	uM	F	CELL-LINE	MCF7	283.354
s1c(SCc2oc(cn2)CC)cnc1NC(=O)C	IC50	=	1.47	uM	F	CELL-LINE	MCF7	283.376
Fc1ccc(OCC2=Nc3c(N(C)C2=O)cccc3)cc1	IC50	=	26	uM	F	CELL-LINE	MCF7	284.29
Fc1cc(ccc1N)C=1Oc2c(C(=O)C=1)c(N)ccc2C	IC50	=	0.015	uM	F	CELL-LINE	MCF7	284.29
O=C(Nc1ccccc1)C(NC(=O)N[O-])c1ccccc1	IC50	=	12.1	uM	F	CELL-LINE	MCF7	284.295
O(C)c1cc(OC)cc(O)c1C(=O)\C=C\c1ccccc1	IC50	=	20	uM	F	CELL-LINE	MCF7	284.311
O1c2c(C(=O)CC1c1ccccc1)c(OC)cc(OC)c2	IC50	=	36	uM	F	CELL-LINE	MCF7	284.311
s1c2c(nc1-c1cc(O)c(NC(=O)C)cc1)cccc2	IC50	=	9	uM	F	CELL-LINE	MCF7	284.339
[nH+]1c2c3c(-c4c(Nc3c3c1cccc3)cc(N)cc4)ccc2	IC50	=	0.05	uM	F	CELL-LINE	MCF7	284.342
O(C)c1c(OC)cc(cc1OC)\C=C/c1ccc(cc1)C	ED50	=	2.4	uM	F	CELL-LINE	MCF7	284.355
O(C)c1c(OC)cc(cc1OC)\C=C\c1ccc(cc1)C	ED50	=	1.9	uM	F	CELL-LINE	MCF7	284.355
s1c2c(nc1C1(OC(=O)C)C=CC(=O)C=C1)cccc2	IC50	=	0.23	uM	F	CELL-LINE	MCF7	285.323
s1c(ccc1[N+](=O)[O-])\C=C(/C)\c1[nH]c2c(n1)cccc2	IC50	=	2.97	uM	F	CELL-LINE	MCF7	285.327
n1cc(c2c3c1-c1c(Nc3ccc2)cccc1)CCCC#N	IC50	=	0.27	uM	F	CELL-LINE	MCF7	285.35
n1c2-c3c(Nc4c2c(cc1CCCC#N)ccc4)cccc3	IC50	=	3.79	uM	F	CELL-LINE	MCF7	285.35
s1c2c(nc1C1(OCCC)C=CC(=O)C=C1)cccc2	IC50	=	0.31	uM	F	CELL-LINE	MCF7	285.367
O1c2c(cc(O)cc2)\C(=C/c2cc(O)c(O)c(O)c2)\C1=O	GI50	=	20	uM	F	CELL-LINE	MCF7	286.239
O(C)c1c(OC)cc(cc1OC)\C=C\c1ccc(O)cc1	ED50	=	18.63	uM	F	CELL-LINE	MCF7	286.327
O(C)c1c(OC)cc(cc1OC)\C=C/c1ccc(O)cc1	ED50	=	5.7	uM	F	CELL-LINE	MCF7	286.327
O(C)c1c(OC)cc(cc1OC)CCc1ccc(cc1)C	ED50	=	2.2	uM	F	CELL-LINE	MCF7	286.371
Oc1cc2CC[C@@H]3[C@@H](c2cc1)C(=O)C[C@]1([C@H]3CC[C@@H]1O)C	EC50	=	0.00897	uM	F	CELL-LINE	MCF7	286.371
Oc1cc2c([C@@H]3[C@H]([C@@H]4CC[C@H](O)[C@]4(CC3)C)CC2=O)cc1	EC50	=	3.38e-06	uM	F	CELL-LINE	MCF7	286.371
Oc1cc2CC(=O)[C@H]3[C@@H]4CC[C@H](O)[C@]4(CC[C@@H]3c2cc1)C	EC50	=	1.6e-05	uM	F	CELL-LINE	MCF7	286.371
Clc1ccc2OC(=CC(=O)c2c1N)c1ccc(N)cc1	IC50	=	0.0039	uM	F	CELL-LINE	MCF7	286.718
Clc1c2OC(=CC(=O)c2c(N)cc1)c1ccc(N)cc1	IC50	=	0.0098	uM	F	CELL-LINE	MCF7	286.718
O(C)c1c(OC)cc(cc1OC)C(=O)c1ccccc1N	IC50	=	0.817	uM	F	CELL-LINE	MCF7	287.315
O(C)c1c(OC)cc(cc1OC)C(=O)c1cc(N)ccc1	IC50	=	0.702	uM	F	CELL-LINE	MCF7	287.315
O(C)c1cc(cc(OC)c1)C(=O)Nc1ccc(OC)cc1	ED50	=	5.47	uM	F	CELL-LINE	MCF7	287.315
s1c2c(nc1C1=CC(=O)C=CC1(OC)OC)cccc2	IC50	=	19.1	uM	F	CELL-LINE	MCF7	287.339
O(C)c1c(OC)cc(cc1OC)CCc1ccc(N)cc1	ED50	=	11.88	uM	F	CELL-LINE	MCF7	287.359
Oc1ccc2[C@@H]3[C@H]([C@@H]4CC[C@H](O)[C@]4(CC3)C)CCc2c1N	EC50	=	0.000346	uM	F	CELL-LINE	MCF7	287.403
Oc1cc2CC[C@H]3[C@@H]4CC[C@H](O)[C@]4(CC[C@@H]3c2cc1N)C	EC50	=	0.000558	uM	F	CELL-LINE	MCF7	287.403
Fc1cc(F)c2OC(=CC(=O)c2c1N)c1ccc(N)cc1	IC50	=	0.006	uM	F	CELL-LINE	MCF7	288.253
O(C)c1c(OC)cc(cc1OC)C(=O)c1ccccc1O	IC50	=	6.728	uM	F	CELL-LINE	MCF7	288.299
O(C)c1c(OC)cc(cc1OC)Cc1ccc(OC)cc1	ED50	=	1.9	uM	F	CELL-LINE	MCF7	288.343
OC1[C@@]2([C@H]([C@H]3[C@H](CC2)c2c(cc(O)cc2)CC3)CC1O)C	EC50	=	4.83e-05	uM	F	CELL-LINE	MCF7	288.387
Oc1cc2CC[C@H]3[C@@H]4CC[C@H](O)[C@]4(C[C@H](O)[C@@H]3c2cc1)C	EC50	=	1.63e-05	uM	F	CELL-LINE	MCF7	288.387
Oc1cc2C[C@@H](O)[C@H]3[C@@H]4CC[C@H](O)[C@]4(CC[C@@H]3c2cc1)C	EC50	=	0.000153	uM	F	CELL-LINE	MCF7	288.387
Oc1cc2CC[C@H]3[C@@H]4CC[C@H](O)[C@]4(C[C@@H](O)[C@@H]3c2cc1)C	EC50	=	3.65e-05	uM	F	CELL-LINE	MCF7	288.387
Oc1cc2c([C@@H]3[C@H]([C@@H]4CC[C@H](O)[C@]4(CC3)C)C[C@@H]2O)cc1	EC50	=	0.000186	uM	F	CELL-LINE	MCF7	288.387
Oc1cc2c([C@@H]3[C@H]([C@@H]4CC[C@H](O)[C@]4(CC3)C)C[C@H]2O)cc1	EC50	=	5.71e-05	uM	F	CELL-LINE	MCF7	288.387
Oc1cc2C[C@H](O)[C@H]3[C@@H]4CC[C@H](O)[C@]4(CC[C@@H]3c2cc1)C	EC50	=	1.22e-05	uM	F	CELL-LINE	MCF7	288.387
O=[N+]([O-])c1cc(ccc1)\C=C(/C#N)\c1[nH]c2c(n1)cccc2	IC50	=	16.39	uM	F	CELL-LINE	MCF7	290.282
O(C)c1cc(ccc1)-c1nc2c(ccc3[nH]ccc23)c(O)c1	IC50	=	1	uM	F	CELL-LINE	MCF7	290.322
O[C@H]1CC[C@H]2[C@@H]3[C@H](CC[C@]12C)[C@@]1(C(C[C@@H](O)CC1)=CC3)C	EC50	=	0.00141	uM	F	CELL-LINE	MCF7	290.447
S(=O)(=O)(C(C[NH2+]C1CC(CCC1O)C(C)(C)C)=C)C	ED50	=	0.47	uM	F	CELL-LINE	MCF7	290.448
O(C)c1ccc(C(=O)C)c(O)c1C\C=C(\CCC(=O)[O-])/C	IC50	=	0.3	uM	F	CELL-LINE	MCF7	291.323
Clc1cc(NC(=O)\C=C\c2ccccc2)cc(Cl)c1	IC50	=	4.47	uM	F	CELL-LINE	MCF7	292.165
Clc1cc(Cl)ccc1NC(=O)\C=C\c1ccccc1	IC50	=	4	uM	F	CELL-LINE	MCF7	292.165
s1cc(c2c1cccc2)-c1nc2ncc(cc2c(O)c1)C	ED50	=	0.125	uM	F	CELL-LINE	MCF7	292.362
s1cc(c2c1cccc2)-c1nc2nccc(c2c(O)c1)C	ED50	=	0.25	uM	F	CELL-LINE	MCF7	292.362
O[C@H]1CC[C@H]2[C@H]3[C@H](CC[C@]12C)[C@@]1([C@H](C[C@@H](O)CC1)CC3)C	EC50	=	0.00466	uM	F	CELL-LINE	MCF7	292.463
O1C2=CC(=O)c3ncccc3C2=Nc2c1cccc2[N+](=O)[O-]	IC50	=	0.3	uM	F	CELL-LINE	MCF7	293.238
O1C2=CC(=O)c3ncccc3C2=Nc2cc([N+](=O)[O-])ccc12	IC50	=	0.01	uM	F	CELL-LINE	MCF7	293.238
O1c2c(N=C3C1=CC(=O)c1ncccc13)cccc2[N+](=O)[O-]	IC50	=	0.5	uM	F	CELL-LINE	MCF7	293.238
O1C2=CC(=O)c3ncccc3C2=Nc2c1cc([N+](=O)[O-])cc2	IC50	=	0.3	uM	F	CELL-LINE	MCF7	293.238
O(C)c1cc(OC)nc2c1-c1nccc3c1c(ncc3)C2=O	IC50	=	5	uM	F	CELL-LINE	MCF7	293.282
O(C)c1c2c(ncc1)-c1nccc3c1c(ncc3OC)C2=O	IC50	=	2	uM	F	CELL-LINE	MCF7	293.282
O(C)c1c2c3c(nc1)C(=O)c1nc(OC)ccc1-c3ncc2	IC50	=	0.5	uM	F	CELL-LINE	MCF7	293.282
O(C)c1c-2c(ncc1)C(=O)c1ncc(OC)c3c1c-2ncc3	IC50	=	0.03	uM	F	CELL-LINE	MCF7	293.282
s1c2c(nc1-c1cc(C(F)(F)F)c(N)cc1)cccc2	GI50	=	1.5	uM	F	CELL-LINE	MCF7	294.3
O1c2c(C(=O)C=C1c1ccc(NC(=O)C)cc1)c(N)ccc2	IC50	=	18	uM	F	CELL-LINE	MCF7	294.31
O1c2c(C(=O)C=C1c1ccc(NCCC)cc1)c(N)ccc2	IC50	=	0.0087	uM	F	CELL-LINE	MCF7	294.354
O=C(NCC[NH+](C)C)c1c2nc3c(cc2ccc1)cccc3	IC50	=	3.8	uM	F	CELL-LINE	MCF7	294.378
O1[C@H](CO)[C@](O)(C)[C@@H](O)C1n1c2ncnc(NC)c2nc1	IC50	=	68.1	uM	F	CELL-LINE	MCF7	295.299
s1c(ccc1[N+](=O)[O-])\C=C(/C#N)\c1[nH]c2c(n1)cccc2	IC50	=	0.16	uM	F	CELL-LINE	MCF7	296.31
O(C)c1ccc(N(C)c2nc3c(nc(nc3N)N)cc2)cc1	GI50	=	0.06	uM	F	CELL-LINE	MCF7	296.334
O(C)c1cc(OC)cc2nc(O)c(cc12)-c1ccc(O)cc1	IC50	=	10	uM	F	CELL-LINE	MCF7	297.31
O=C1c2c(nccc2)-c2nccc3c2c1nc1c3cc(cc1)C	IC50	=	0.03	uM	F	CELL-LINE	MCF7	297.317
Oc1ccc(cc1)\C(=C(/C#N)\c1ccccc1)\c1ccccc1	EC50	=	0.00019	uM	F	CELL-LINE	MCF7	297.357
Oc1ccc(cc1)\C(=C(\C#N)/c1ccccc1)\c1ccccc1	EC50	=	0.0004	uM	F	CELL-LINE	MCF7	297.357
Oc1ccc(cc1)/C(=C(/c1ccccc1)\c1ccccc1)/C#N	EC50	=	0.00055	uM	F	CELL-LINE	MCF7	297.357
O=C1c2c(nccc2)-c2nccc3c2c1nc1c3cc(N)cc1	IC50	=	0.02	uM	F	CELL-LINE	MCF7	298.305
O=C1c2c(nccc2)-c2nccc3c2c1nc1c3cccc1N	IC50	=	0.005	uM	F	CELL-LINE	MCF7	298.305
Fc1cc(ccc1N)C=1Oc2c(c(N)c(cc2C)C)C(=O)C=1	IC50	=	0.036	uM	F	CELL-LINE	MCF7	298.317
s1c2c(cc1C(=O)C)C(=O)c1c(cc(cc1)C(=O)C)C2=O	GI50	=	0.31623	uM	F	CELL-LINE	MCF7	298.318
O=C(NCc1ccccc1)C(NC(=O)N[O-])c1ccccc1	IC50	=	17.8	uM	F	CELL-LINE	MCF7	298.322
O(C)c1c(OC)c2c3c(cccc3OC)ccc2cc1OC	ED50	=	1.8	uM	F	CELL-LINE	MCF7	298.338
O(C)c1c(OC)c2c3c(ccc2cc1OC)c(OC)ccc3	ED50	=	14.6	uM	F	CELL-LINE	MCF7	298.338
OCCNc1nc(NCc2ccccc2)c2ncn(c2n1)C	IC50	=	132	uM	F	CELL-LINE	MCF7	298.35
O=C(CCCCCCC(=O)N[O-])c1cc2c(cc1)cccc2	IC50	=	25	uM	F	CELL-LINE	MCF7	298.362
s1c2c(nc1-c1cc(C)c(NC(=O)C)cc1)cccc2O	IC50	=	48.2	uM	F	CELL-LINE	MCF7	298.366
s1c2c(nc1-c1cc(C)c(NC(=O)C)cc1)cc(O)cc2	IC50	=	72.5	uM	F	CELL-LINE	MCF7	298.366
s1c2c(nc1-c1cc(C)c(NC(=O)C)cc1)c(O)ccc2	IC50	=	33	uM	F	CELL-LINE	MCF7	298.366
s1c2cc(O)ccc2nc1-c1cc(C)c(NC(=O)C)cc1	IC50	=	46.1	uM	F	CELL-LINE	MCF7	298.366
O(C)c1c(OC)cc(cc1OC)\C=C/c1ccc(cc1)CC	ED50	=	7.2	uM	F	CELL-LINE	MCF7	298.382
O(C)c1c(OC)cc(cc1OC)\C=C\c1ccc(cc1)CC	ED50	=	1.2	uM	F	CELL-LINE	MCF7	298.382
Oc1cc2CC[C@H]3[C@@H]4CCC(=O)[C@]4(CC[C@@H]3c2cc1CC)C	GI50	=	57.6	uM	F	CELL-LINE	MCF7	298.426
Oc1c-2c(ncc1)C(=O)c1nccc3c1c-2nc1c3cccc1	IC50	=	0.09	uM	F	CELL-LINE	MCF7	299.289
Oc1c2c(ncc1)-c1nccc3c1c(nc1c3cccc1)C2=O	IC50	=	2	uM	F	CELL-LINE	MCF7	299.289
O=C1c2nccc3c2c(nc2c3cccc2)-c2c1[nH+]ccc2N	IC50	=	0.09	uM	F	CELL-LINE	MCF7	299.313
O(C)c1c(OC)cc(cc1OC)\C=C\c1ccccc1OC	ED50	=	18	uM	F	CELL-LINE	MCF7	300.354
O(C)c1c(OC)cc(cc1OC)\C=C/c1ccccc1OC	ED50	=	1.3	uM	F	CELL-LINE	MCF7	300.354
O(C)c1c(OC)cc(cc1OC)\C=C/c1ccc(OC)cc1	ED50	=	1.2e-06	uM	F	CELL-LINE	MCF7	300.354
O(C)c1c(OC)cc(cc1OC)\C=C/c1cc(OC)ccc1	ED50	=	0.14	uM	F	CELL-LINE	MCF7	300.354
O(C)c1c(OC)cc(cc1OC)\C=C\c1cc(OC)ccc1	ED50	=	12.2	uM	F	CELL-LINE	MCF7	300.354
O(C)c1c(OC)cc(cc1OC)\C=C\c1ccc(OC)cc1	ED50	=	1.05	uM	F	CELL-LINE	MCF7	300.354
O(C)c1c(OC)c(OC)ccc1\C=C/c1ccc(OC)cc1	ED50	=	0.23	uM	F	CELL-LINE	MCF7	300.354
O(C)c1c(OC)cc(cc1OC)CCc1ccc(cc1)CC	ED50	=	1.6	uM	F	CELL-LINE	MCF7	300.398
O(C)c1cc2[C@@H]3[C@H]([C@@H]4CCC(=O)[C@]4(CC3)C)CCc2cc1O	GI50	=	21.3	uM	F	CELL-LINE	MCF7	300.398
Oc1cc2CC[C@H]3[C@@H]4CC[C@H](O)[C@]4(CC[C@@H]3c2cc1CC)C	GI50	=	10.5	uM	F	CELL-LINE	MCF7	300.442
ClC[C@H](NC(=O)Nc1cc-2c(Cc3c-2cccc3)cc1)C	IC50	=	10	uM	F	CELL-LINE	MCF7	300.789
ClC[C@@H](NC(=O)Nc1cc-2c(Cc3c-2cccc3)cc1)C	IC50	=	29	uM	F	CELL-LINE	MCF7	300.789
O=C([C@@H](\C=C(\C=C\C(=O)N[O-])/C)C)c1ccc(N(C)C)cc1	IC50	=	10	uM	F	CELL-LINE	MCF7	301.366
O[C@H]1CC[C@H]2[C@H]3[C@@H](c4c(CC3)cccc4[N+](=O)[O-])CC[C@]12C	EC50	=	0.0604	uM	F	CELL-LINE	MCF7	301.386
O[C@H]1CC[C@H]2[C@H]3[C@H](CC[C@]12C)c1c(cc([N+](=O)[O-])cc1)CC3	EC50	=	0.00216	uM	F	CELL-LINE	MCF7	301.386
O[C@H]1CC[C@H]2[C@H]3[C@H](CC[C@]12C)c1cc([N+](=O)[O-])ccc1CC3	EC50	=	0.0293	uM	F	CELL-LINE	MCF7	301.386
O[C@H]1CC[C@H]2[C@H]3[C@H](CC[C@]12C)c1c(CC3)c([N+](=O)[O-])ccc1	EC50	=	0.0342	uM	F	CELL-LINE	MCF7	301.386
Clc1nc(N)c2ncn(c2n1)[C@@H]1O[C@H](CO)[C@@H](O)[C@H]1O	IC50	=	72.6	uM	F	CELL-LINE	MCF7	301.69
Brc1ccccc1NC(=O)\C=C\c1ccccc1	IC50	=	4.05	uM	F	CELL-LINE	MCF7	302.171
O1c2c(C(=O)C(O)=C1c1cc(O)c(O)cc1)c(O)cc(O)c2	IC50	=	24	uM	F	CELL-LINE	MCF7	302.238
O(C)c1c(OC)cc(cc1OC)C(=O)c1cc(OC)ccc1	IC50	=	0.749	uM	F	CELL-LINE	MCF7	302.326
O(C)c1c(OC)cc(cc1OC)C(=O)c1ccc(OC)cc1	IC50	=	0.586	uM	F	CELL-LINE	MCF7	302.326
O(C)c1c(OC)cc(cc1OC)CCc1ccccc1OC	ED50	=	11.8	uM	F	CELL-LINE	MCF7	302.37
O(C)c1c(OC)cc(cc1OC)CCc1cc(OC)ccc1	ED50	=	12.4	uM	F	CELL-LINE	MCF7	302.37
O(C)c1c(OC)cc(cc1OC)CCc1ccc(OC)cc1	ED50	=	0.00016	uM	F	CELL-LINE	MCF7	302.37
O(C)c1cc2[C@@H]3[C@H]([C@@H]4CC[C@H](O)[C@]4(CC3)C)CCc2cc1O	IC50	=	2.39	uM	F	CELL-LINE	MCF7	302.414
S(=O)(=O)(C(C[NH+]1C2CC(CCC2OC1)C(C)(C)C)=C)C	ED50	=	0.24	uM	F	CELL-LINE	MCF7	302.459
Brc1ccc(cc1)\C=C\C(=O)c1ccccc1O	IC50	=	12.3	uM	F	CELL-LINE	MCF7	303.155
ClCCN(CCCl)c1ccc(cc1)CCCC(=O)[O-]	GI50	=	30	uM	F	CELL-LINE	MCF7	303.209
O(C)c1c(OC)cc(cc1OC)CNc1ccc(OC)cc1	ED50	=	0.0024	uM	F	CELL-LINE	MCF7	303.358
O(C)c1c(OC)cc(NCc2ccc(OC)cc2)cc1OC	ED50	=	0.86	uM	F	CELL-LINE	MCF7	303.358
Clc1cc2-c3c4c(Nc2cc1)c1c([nH+]c4ccc3)cccc1	IC50	=	1.67	uM	F	CELL-LINE	MCF7	303.772
O(C)c1c(OC)cc(cc1OC)C(O)c1ccc(OC)cc1	ED50	=	1.9	uM	F	CELL-LINE	MCF7	304.342
S(CCCCCCO)C1=C(C)C(=O)c2c(cccc2)C1=O	IC50	=	9.28	uM	F	CELL-LINE	MCF7	304.41
S(SC(=S)N(CC)CC)(=O)(=O)c1ccc(N)cc1	GI50	=	5	uM	F	CELL-LINE	MCF7	304.459
S(=O)(=O)(C(C[NH+](C)C1CC(CCC1O)C(C)(C)C)=C)C	ED50	=	0.17	uM	F	CELL-LINE	MCF7	304.475
Clc1ccc(cc1)\C=C/c1cc(OC)c(OC)c(OC)c1	ED50	=	0.18	uM	F	CELL-LINE	MCF7	304.773
Oc1cc(nc2c1ccc1[nH]ccc12)-c1cc([N+](=O)[O-])ccc1	IC50	=	70	uM	F	CELL-LINE	MCF7	305.293
Oc1cc(nc2c1ccc1[nH]ccc12)-c1ccc([N+](=O)[O-])cc1	IC50	=	60	uM	F	CELL-LINE	MCF7	305.293
S1C2=C(C([NH3+])(C1)C(OCC)=O)C(=O)c1ncccc1C2=O	IC50	=	0.2	uM	F	CELL-LINE	MCF7	305.334
S1C2=C(C([NH3+])(C1)C(OCC)=O)C(=O)c1c(nccc1)C2=O	IC50	=	0.5	uM	F	CELL-LINE	MCF7	305.334
s1c2c(nc1-c1ccc(NS(=O)(=O)[O-])cc1)cccc2	IC50	=	3.4	uM	F	CELL-LINE	MCF7	305.358
Fc1cc(F)c2OC(=CC(=O)c2c1N)c1cc(F)c(N)cc1	IC50	=	0.04	uM	F	CELL-LINE	MCF7	306.243
s1cc(c2c1cccc2)-c1nc2nc(cc(c2c(O)c1)C)C	ED50	=	0.5	uM	F	CELL-LINE	MCF7	306.389
o1c(ccc1[N+](=O)[O-])\C=C(/C#N)\c1nc([nH]n1)-c1ccccc1	IC50	=	1.62	uM	F	CELL-LINE	MCF7	307.269
O(C)c1c2c3c(nc1)C(=O)c1[nH+]ccc(N(C)C)c1-c3ncc2	IC50	=	4	uM	F	CELL-LINE	MCF7	307.333
Oc1cc2CC(n3c(-c2cc1)c(c1c3cc(O)cc1)C=O)CC	IC50	=	2.5	uM	F	CELL-LINE	MCF7	307.349
Oc1cc2c(cc1)C(N(CC2)c1ccccc1)C1CCCCC1	EC50	=	0.0111	uM	F	CELL-LINE	MCF7	307.437
O1c2c(C(=O)C=C1c1ccc(NCCCC)cc1)c(N)ccc2	IC50	=	0.0087	uM	F	CELL-LINE	MCF7	308.381
O1c2c(C(=O)C=C1c1ccc(N(CC)CC)cc1)c(N)ccc2	IC50	=	0.01	uM	F	CELL-LINE	MCF7	308.381
O(CC1=Nc2c(N(C)C1=O)cccc2)c1cc(N(C)C)ccc1	IC50	=	57	uM	F	CELL-LINE	MCF7	309.369
O(C)c1cc(OC)cc2N(C)C(=O)C(=Cc12)c1ccc(O)cc1	IC50	=	10	uM	F	CELL-LINE	MCF7	311.337
O(C)c1c2c(nc(O)c(c2)-c2ccc(OC)cc2)c(OC)cc1	IC50	=	10	uM	F	CELL-LINE	MCF7	311.337
O(C)c1cc(OC)cc2nc(O)c(cc12)-c1ccc(OC)cc1	IC50	=	0	uM	F	CELL-LINE	MCF7	311.337
O(C)c1cc(cc(OC)c1)C(=O)n1c2c(cc(OC)cc2)cc1	IC50	=	9.429	uM	F	CELL-LINE	MCF7	311.337
O(C)c1cc(cc(OC)c1)C(=O)c1c2c([nH]c1)cc(OC)cc2	IC50	=	0.02	uM	F	CELL-LINE	MCF7	311.337
Oc1ccc(cc1)/C(=C(\C#N)/c1ccccc1)/c1ccc(cc1)C	EC50	=	0.00028	uM	F	CELL-LINE	MCF7	311.384
Oc1ccc(cc1)/C(=C(/C#N)\c1ccccc1)/c1ccc(cc1)C	EC50	=	0.00042	uM	F	CELL-LINE	MCF7	311.384
Clc1[nH+]c2c(-c3nccc4c3c(ncc4)C2=O)c(N(C)C)c1	IC50	=	6	uM	F	CELL-LINE	MCF7	311.752
P(=O)([O-])([O-])[C@H]1O[C@@H](CC1)Cn1c2nc(nc(N)c2nc1)N	IC50	=	52	uM	F	CELL-LINE	MCF7	312.226
O(C)c1ccc(cc1)\C=C/1\c2c(cccc2)C(=O)c2c\1cccc2	IC50	=	0.56	uM	F	CELL-LINE	MCF7	312.368
O(C)c1c(OC)cc(cc1OC)\C=C\c1ccc(cc1)C(C)C	ED50	=	18.4	uM	F	CELL-LINE	MCF7	312.409
O(C)c1c(OC)cc(cc1OC)\C=C/c1ccc(cc1)C(C)C	ED50	=	1.4	uM	F	CELL-LINE	MCF7	312.409
P(=O)([O-])([O-])[C@@H]1O[C@@H](CC1)Cn1c2nc(nc(O)c2nc1)N	IC50	=	67	uM	F	CELL-LINE	MCF7	313.21
FC(F)(F)c1ccc(cc1)\C=C(/C#N)\c1[nH]c2c(n1)cccc2	IC50	=	9.11	uM	F	CELL-LINE	MCF7	313.282
O(C)c1c2c(ncc1)-c1nccc3c1c(nc1c3cccc1)C2=O	IC50	=	0.6	uM	F	CELL-LINE	MCF7	313.316
O(C)c1cc2c3c4c(nc2cc1)C(=O)c1c(nccc1)-c4ncc3	IC50	=	0.08	uM	F	CELL-LINE	MCF7	313.316
O(C)c1c(OC)cc(cc1OC)\C=C(/C(=O)[O-])\c1ccccc1	IC50	=	88	uM	F	CELL-LINE	MCF7	313.329
Oc1ccc(cc1)\C(=C(/C#N)\c1ccc(O)cc1)\c1ccccc1	EC50	=	6.3e-05	uM	F	CELL-LINE	MCF7	313.356
Oc1ccc(cc1)\C(=C(/C#N)\c1ccccc1)\c1ccc(O)cc1	EC50	=	5.9e-05	uM	F	CELL-LINE	MCF7	313.356
Oc1ccc(cc1)\C(=C(\C#N)/c1ccc(O)cc1)\c1ccccc1	EC50	=	9.1e-05	uM	F	CELL-LINE	MCF7	313.356
O(C)c1c(OC)cc(cc1OC)\C=C/c1ccc(N(C)C)cc1	ED50	=	0.0058	uM	F	CELL-LINE	MCF7	313.397
O(C)c1c(OC)cc(cc1OC)\C=C\c1ccc(N(C)C)cc1	ED50	=	0.082	uM	F	CELL-LINE	MCF7	313.397
O=C1N(CC[NH+](C)C)C(=O)c2c3c1cc([N+](=O)[O-])cc3ccc2	GI50	=	0.245	uM	F	CELL-LINE	MCF7	314.321
S1C2=C(C3(NC(=O)N(C)C3=O)C1)C(=O)c1c(cccc1)C2=O	IC50	=	0.023	uM	F	CELL-LINE	MCF7	314.321
O=[N+]([O-])c1cc2Nc3c4c(-c2cc1)cccc4[nH+]c1c3cccc1	IC50	=	0.55	uM	F	CELL-LINE	MCF7	314.324
Oc1cc(ccc1O)\C=C/1\c2c(cccc2)C(=O)c2c\1cccc2	IC50	=	0.04	uM	F	CELL-LINE	MCF7	314.34
O(C)c1c(OC)cc(cc1OC)\C=C\c1ccc(OCC)cc1	ED50	=	7.5	uM	F	CELL-LINE	MCF7	314.381
O(C)c1c(OC)cc(cc1OC)\C=C/c1ccc(OCC)cc1	ED50	=	9.6	uM	F	CELL-LINE	MCF7	314.381
O(CCCOc1ccc(cc1)C(=[NH2+])N)c1ccc(cc1)C(=[NH2+])N	GI50	=	9	uM	F	CELL-LINE	MCF7	314.389
O(CC)c1cc2[C@@H]3[C@H]([C@@H]4CCC(=O)[C@]4(CC3)C)CCc2cc1O	GI50	=	9.04	uM	F	CELL-LINE	MCF7	314.425
Clc1ccc(NC(=O)CC)cc1-c1oc2c(n1)cc(cc2)C	IC50	=	40	uM	F	CELL-LINE	MCF7	314.772
Oc1c2NC(O)C3N(C=C(C3)\C=C\C(=O)N)C(=O)c2ccc1C	GI50	=	0.0398	uM	F	CELL-LINE	MCF7	315.329
s1c2c(nc1C1=CC(=O)C=CC1(OCC)OCC)cccc2	IC50	=	1.8	uM	F	CELL-LINE	MCF7	315.393
O(C)c1c(OC)cc(cc1OC)CCc1ccc(N(C)C)cc1	ED50	=	0.064	uM	F	CELL-LINE	MCF7	315.413
S(=O)(=O)(C(CN1C2CC(CCC2OC1=O)C(C)(C)C)=C)C	ED50	=	2.7	uM	F	CELL-LINE	MCF7	315.434
O=C(NCCCCCCCCCCCC)\C=C\c1ccccc1	IC50	=	13.4	uM	F	CELL-LINE	MCF7	315.501
Brc1ccc(cc1)C=1Oc2c(C(=O)C=1)c(N)ccc2	IC50	=	9.5	uM	F	CELL-LINE	MCF7	316.154
O1c2c3c(ccc2)cccc3OC12C=CC(=O)c1c2cccc1O	IC50	=	1	uM	F	CELL-LINE	MCF7	316.312
O(C)c1ccc(OC)cc1CCc1cc(C(OC)=O)c(O)cc1	IC50	=	0.019	uM	F	CELL-LINE	MCF7	316.353
O(C)c1c(OC)cc(cc1OC)\C=C/c1cc(O)c(OC)cc1	IC50	=	0.025	uM	F	CELL-LINE	MCF7	316.353
O(CC1=Nc2c(N(C)C1=O)cccc2)c1cc2c(cc1)cccc2	IC50	=	40	uM	F	CELL-LINE	MCF7	316.36
O(CC1=Nc2c(N(C)C1=O)cccc2)c1c2c(ccc1)cccc2	IC50	=	20	uM	F	CELL-LINE	MCF7	316.36
O(C)c1cc2c(n3c(-c4nc5c(cc(O)cc5)c(c4C3)C)c2)cc1	IC50	=	12	uM	F	CELL-LINE	MCF7	316.36
n1c(N)c2nc(N(C)c3cc4c(cc3)cccc4)ccc2nc1N	GI50	=	0.03	uM	F	CELL-LINE	MCF7	316.368
O(C)c1c(OC)cc(cc1OC)CCc1ccc(OCC)cc1	ED50	=	1.9	uM	F	CELL-LINE	MCF7	316.397
Oc1ccc(cc1)\C(=C(\CCO)/c1ccccc1)\c1ccccc1	IC50	=	0.0005	uM	F	CELL-LINE	MCF7	316.4
S(C)c1ccc(cc1)\C=C\c1cc(OC)c(OC)c(OC)c1	ED50	=	5.9	uM	F	CELL-LINE	MCF7	316.421
S(C)c1ccc(cc1)\C=C/c1cc(OC)c(OC)c(OC)c1	ED50	=	5.4	uM	F	CELL-LINE	MCF7	316.421
S(C)c1cc2[C@@H]3[C@H]([C@@H]4CCC(=O)[C@]4(CC3)C)CCc2cc1O	IC50	=	33.4	uM	F	CELL-LINE	MCF7	316.465
S(=O)(=O)(Nc1ccc(OC)cc1)c1cc(F)c(F)c(F)c1	GI50	=	2	uM	F	CELL-LINE	MCF7	317.287
O(C)c1c(OC)cc(cc1OC)C(=O)c1ccc(OC)cc1N	IC50	=	0.023	uM	F	CELL-LINE	MCF7	317.341
O(C)c1c(OC)cc(cc1OC)C(=O)c1cccc(OC)c1N	IC50	=	7.639	uM	F	CELL-LINE	MCF7	317.341
O(C)c1c(OC)cc(cc1OC)C(=O)c1cc(OC)ccc1N	IC50	=	0.061	uM	F	CELL-LINE	MCF7	317.341
O(C)c1c(OC)cc(cc1OC)C(=O)Nc1ccc(OC)cc1	ED50	=	12.21	uM	F	CELL-LINE	MCF7	317.341
S(=O)(=O)(Nc1ccc(cc1)\C=C\C(=O)N[O-])c1ccccc1	IC50	=	2.5	uM	F	CELL-LINE	MCF7	317.345
Oc1cc2CC[C@H]3[C@@H]4CC[C@H](O)[C@]4(CC[C@@H]3c2cc1[N+](=O)[O-])C	EC50	=	0.0335	uM	F	CELL-LINE	MCF7	317.385
Oc1ccc2[C@@H]3[C@H]([C@@H]4CC[C@H](O)[C@]4(CC3)C)CCc2c1[N+](=O)[O-]	EC50	=	0.0009	uM	F	CELL-LINE	MCF7	317.385
Clc1c-2c(ncc1)C(=O)c1nccc3c1c-2nc1c3cccc1	IC50	=	0.08	uM	F	CELL-LINE	MCF7	317.735
Clc1cc2c3c4c(nc2cc1)C(=O)c1c(nccc1)-c4ncc3	IC50	=	0.5	uM	F	CELL-LINE	MCF7	317.735
O(C)c1c(OC)cc(cc1OC)C(=O)c1cc(O)c(OC)cc1	IC50	=	0.437	uM	F	CELL-LINE	MCF7	318.325
O(C)c1c(OC)cc(cc1OC)C(=O)c1ccc(OC)cc1O	IC50	=	0.63	uM	F	CELL-LINE	MCF7	318.325
O(C)c1c(OC)cc(cc1OC)C(=O)c1cc(OC)ccc1O	IC50	=	0.61	uM	F	CELL-LINE	MCF7	318.325
O1c2c3c(ccc2)cccc3OC12C1=C(CCCC1=O)C(=O)C=C2	IC50	=	3.8	uM	F	CELL-LINE	MCF7	318.328
O(C)c1c(OC)cc(cc1OC)CCc1cc(O)c(OC)cc1	ED50	=	0.33	uM	F	CELL-LINE	MCF7	318.369
S(C)c1ccc(cc1)CCc1cc(OC)c(OC)c(OC)c1	ED50	=	2	uM	F	CELL-LINE	MCF7	318.437
S(C)c1cc2[C@@H]3[C@H]([C@@H]4CC[C@H](O)[C@]4(CC3)C)CCc2cc1O	IC50	=	3.96	uM	F	CELL-LINE	MCF7	318.481
Clc1cc(ccc1NC(=O)C)-c1sc2c(n1)c(O)ccc2	IC50	=	56.8	uM	F	CELL-LINE	MCF7	318.784
Clc1cc(ccc1NC(=O)C)-c1sc2c(n1)cc(O)cc2	IC50	=	31	uM	F	CELL-LINE	MCF7	318.784
Clc1cc(ccc1NC(=O)C)-c1sc2cc(O)ccc2n1	IC50	=	71.2	uM	F	CELL-LINE	MCF7	318.784
O1Cc2c(c(O)c(C\C=C(\CCC(=O)[O-])/C)c(OC)c2C)C1=O	IC50	=	0.5	uM	F	CELL-LINE	MCF7	319.333
Fc1ccc(cc1)C1N(CCc2c1ccc(O)c2)c1ccccc1	EC50	=	0.001	uM	F	CELL-LINE	MCF7	319.379
s1c2c(nc1-c1cc(C)c(NS(=O)(=O)[O-])cc1)cccc2	IC50	=	0.49	uM	F	CELL-LINE	MCF7	319.385
Fc1c(C)c(F)c2OC(=CC(=O)c2c1N)c1cc(F)c(N)cc1	IC50	=	0.013	uM	F	CELL-LINE	MCF7	320.27
Clc1cc(Cl)c2OC(=CC(=O)c2c1N)c1ccc(N)cc1	IC50	=	0.053	uM	F	CELL-LINE	MCF7	321.163
Fc1c(N)c(F)c2OC(=CC(=O)c2c1N)c1cc(F)c(N)cc1	IC50	=	0.0077	uM	F	CELL-LINE	MCF7	321.258
o1c(ccc1[N+](=O)[O-])\C=C(/C#N)\c1nc([nH]n1)Cc1ccccc1	IC50	=	0.61	uM	F	CELL-LINE	MCF7	321.296
Oc1cc2CC(n3c(-c2cc1)c(c1c3cc(O)cc1)C=O)CCC	IC50	=	0.29	uM	F	CELL-LINE	MCF7	321.376
O(CC1=Nc2c(N(C)C1=O)cccc2)c1cc(ccc1)C(C)(C)C	IC50	=	19	uM	F	CELL-LINE	MCF7	322.408
s1c2c(nc1-c1cc(C#C[Si](C)(C)C)c(N)cc1)cccc2	GI50	=	0.71	uM	F	CELL-LINE	MCF7	322.507
Clc1ncnc2n(cnc12)C\C=C\1/OC(=O)C(OC)=C/1OC	IC50	=	16.87	uM	F	CELL-LINE	MCF7	322.708
s1c(ccc1[N+](=O)[O-])\C=C(/C#N)\c1nc([nH]n1)-c1ccccc1	IC50	=	0.68	uM	F	CELL-LINE	MCF7	323.336
SCC(=O)NCCCCCNC(=O)c1ccc(N(C)C)cc1	IC50	=	125	uM	F	CELL-LINE	MCF7	323.461
Fc1cc(cc(F)c1N)C=1Oc2c(c(N)c(F)cc2F)C(=O)C=1	IC50	=	0.004	uM	F	CELL-LINE	MCF7	324.233
S1C2=C(n3cc(nc3C=C2)C(OCC)=O)C(=O)c2c1cccc2	IC50	=	84.4	uM	F	CELL-LINE	MCF7	324.36
O=C(CCCCCCC(=O)N[O-])c1ccc(cc1)-c1ccccc1	IC50	=	2	uM	F	CELL-LINE	MCF7	324.4
O(CCCCCNC(N(C#N)c1cc[nH+]cc1)=N)c1ccccc1	IC50	=	0.15	uM	F	CELL-LINE	MCF7	324.408
Ic1ccc(NC(=O)NCCCl)cc1	IC50	=	23	uM	F	CELL-LINE	MCF7	324.549
O(C)c1cc(OC)cc2N(C)C(=O)C(=Cc12)c1ccc(OC)cc1	IC50	=	10	uM	F	CELL-LINE	MCF7	325.364
O=C1c2c(nccc2)-c2nccc3c2c1nc1c3cc(N(C)C)cc1	IC50	=	0.006	uM	F	CELL-LINE	MCF7	326.359
O(C)c1c(OC)cc(cc1OC)\C=C/c1ccc(cc1)C(C)(C)C	ED50	=	1.57	uM	F	CELL-LINE	MCF7	326.436
Clc1ccc(NC(OCC#C)=O)cc1-c1oc2c(n1)cccc2	IC50	=	20	uM	F	CELL-LINE	MCF7	326.739
O(C)c1c(OC)cc(cc1OC)C(=O)c1c2c([nH]c1)cc(O)cc2	IC50	=	0.728	uM	F	CELL-LINE	MCF7	327.336
O=C1c2nccc3c2c(nc2c3cccc2)-c2c1[nH+]ccc2N(C)C	IC50	=	0.08	uM	F	CELL-LINE	MCF7	327.367
O(C)c1c(OC)cc(cc1OC)CC(C#N)c1ccc(OC)cc1	ED50	=	14.3	uM	F	CELL-LINE	MCF7	327.38
O(C)c1c(OC)cc(cc1OC)C(Cc1ccc(OC)cc1)C#N	ED50	=	1.4	uM	F	CELL-LINE	MCF7	327.38
Oc1ccc(cc1)/C(=C(\C#N)/c1ccc(O)cc1)/c1ccc(cc1)C	EC50	=	0.000105	uM	F	CELL-LINE	MCF7	327.383
Oc1ccc(cc1)/C(=C(/C#N)\c1ccc(O)cc1)/c1ccc(cc1)C	EC50	=	0.00014	uM	F	CELL-LINE	MCF7	327.383
O(C)c1ccc(cc1)\C(=C(/C#N)\c1ccccc1)\c1ccc(O)cc1	EC50	=	0.0002	uM	F	CELL-LINE	MCF7	327.383
Oc1ccc(cc1)\C(=C(/C#N)\c1ccc(cc1)C)\c1ccc(O)cc1	EC50	=	0.00014	uM	F	CELL-LINE	MCF7	327.383
O(C)c1ccc(cc1)\C(=C(\C#N)/c1ccccc1)\c1ccc(O)cc1	EC50	=	0.00019	uM	F	CELL-LINE	MCF7	327.383
P(=O)([O-])([O-])[C@@H]1O[C@H](Cn2c3nc(nc(N)c3nc2)N)[C@@H](O)C1	IC50	=	1.4	uM	F	CELL-LINE	MCF7	328.225
O=C1c2nccc([N+](=O)[O-])c2-c2nc3c(c4c2c1ncc4)cccc3	IC50	=	0.07	uM	F	CELL-LINE	MCF7	328.287
O=C1c2c(nccc2)-c2nccc3c2c1nc1c3cccc1[N+](=O)[O-]	IC50	=	0.005	uM	F	CELL-LINE	MCF7	328.287
S1C2=C(C3(NC(=O)N(CC)C3=O)C1)C(=O)c1c(cccc1)C2=O	IC50	=	0.116	uM	F	CELL-LINE	MCF7	328.348
O=C1c2c(C(=O)c3c1cccc3)c(nnc2NCC[NH2+]CCO)N	IC50	=	0.00047	uM	F	CELL-LINE	MCF7	328.352
O(C)c1c(OC)cc(cc1OC)\C=C/c1ccc(OC(=O)C)cc1	ED50	=	3	uM	F	CELL-LINE	MCF7	328.364
O(C)c1c(OC)cc(cc1OC)\C=C\c1ccc(OC(=O)C)cc1	ED50	=	9.6	uM	F	CELL-LINE	MCF7	328.364
O(C(=O)C)c1c(OC)cc(cc1OC)\C=C\c1ccc(OC)cc1	ED50	=	19.4	uM	F	CELL-LINE	MCF7	328.364
O(C)c1cccc(\C=C/2\c3c(cccc3)C(=O)c3c\2cccc3)c1O	IC50	=	0.8	uM	F	CELL-LINE	MCF7	328.367
O(C)c1cc(ccc1O)\C=C/1\c2c(cccc2)C(=O)c2c\1cccc2	IC50	=	2.52	uM	F	CELL-LINE	MCF7	328.367
S(CCCn1cc(c2c1cccc2)C1=CC(=O)NC1=O)C(N)=N	GI50	=	0.02	uM	F	CELL-LINE	MCF7	328.396
O(C)c1c(OC)cc(cc1OC)\C=C\c1ccc(OCCC)cc1	ED50	=	12.5	uM	F	CELL-LINE	MCF7	328.408
O(C)c1c(OC)cc(cc1OC)\C=C/c1ccc(OCCC)cc1	ED50	=	6.6	uM	F	CELL-LINE	MCF7	328.408
P(=O)([O-])([O-])[C@@H]1O[C@H](Cn2c3nc(nc(O)c3nc2)N)[C@@H](O)C1	IC50	=	0.67	uM	F	CELL-LINE	MCF7	329.209
P(=O)([O-])([O-])[C@H]1O[C@H](Cn2c3nc(nc(O)c3nc2)N)[C@@H](O)C1	IC50	=	53	uM	F	CELL-LINE	MCF7	329.209
Oc1ccc(cc1)\C(=C(/C#N)\c1ccc(O)cc1)\c1ccc(O)cc1	EC50	=	3.6e-05	uM	F	CELL-LINE	MCF7	329.355
O(C)c1c(OC)cc(cc1OC)Cc1nc2c(ncnc2N)n1C	IC50	=	70.7946	uM	F	CELL-LINE	MCF7	329.36
O=C(NC1CCCC1)C(NC(=O)n1nnc2c1cccc2)C(C)C	IC50	=	79.3	uM	F	CELL-LINE	MCF7	329.404
[nH]1nc(nc1Cc1ccccc1)/C(=C/c1ccc(N(C)C)cc1)/C#N	IC50	=	1.49	uM	F	CELL-LINE	MCF7	329.407
Oc1c2c(C(=O)C=C([C@H](OC(=O)C)C\C=C(\C)/C)C2=O)c(O)cc1	IC50	=	31	uM	F	CELL-LINE	MCF7	330.336
O(C)c1c(OC)c2c(cc1OC)CCC2c1cc(O)c(OC)cc1	GI50	=	10	uM	F	CELL-LINE	MCF7	330.38
O(C)c1c(OC)cc(cc1OC)C(=O)c1cc(N(C)C)ccc1N	IC50	=	4.801	uM	F	CELL-LINE	MCF7	330.384
O(C)c1c(OC)cc(cc1OC)CCc1ccc(OCCC)cc1	ED50	=	3.9	uM	F	CELL-LINE	MCF7	330.424
Oc1cc2CC[C@H]3[C@@H]4CC[C@@](O)(CCCO)[C@]4(CC[C@@H]3c2cc1)C	IC50	=	71	uM	F	CELL-LINE	MCF7	330.468
S(CC)c1cc2[C@@H]3[C@H]([C@@H]4CCC(=O)[C@]4(CC3)C)CCc2cc1O	IC50	=	31.9	uM	F	CELL-LINE	MCF7	330.492
O1c2cc(C(=O)c3cc(OC)c(OC)c(OC)c3)c(N)cc2OC1	IC50	=	0.726	uM	F	CELL-LINE	MCF7	331.324
SCC(=O)NCCCCCC(=O)Nc1cc2c(nc1)cccc2	IC50	=	80	uM	F	CELL-LINE	MCF7	331.44
SCC(=O)NCCCCCC(=O)Nc1c2ncccc2ccc1	IC50	=	42	uM	F	CELL-LINE	MCF7	331.44
Oc1cc2CC(n3c(-c2cc1)c(c1c3cc(O)cc1)C#N)CCCC	IC50	=	0.54	uM	F	CELL-LINE	MCF7	332.403
S(CC)c1cc2[C@@H]3[C@H]([C@@H]4CC[C@H](O)[C@]4(CC3)C)CCc2cc1O	GI50	=	23.2	uM	F	CELL-LINE	MCF7	332.508
S(=O)(=O)(N)c1ccc(NSC(=S)N2CCOCC2)cc1	GI50	=	0.033	uM	F	CELL-LINE	MCF7	333.457
Fc1c(CC)c(F)c2OC(=CC(=O)c2c1N)c1cc(F)c(N)cc1	IC50	=	0.13	uM	F	CELL-LINE	MCF7	334.297
O1c2c3c(ccc2)cccc3OC12C1=C(CCCC1=O)C(=O)C1OC12	IC50	=	4.6	uM	F	CELL-LINE	MCF7	334.327
O1c2c3c(ccc2)cccc3OC12C13OC1(CCCC3=O)C(=O)C=C2	IC50	=	1.3	uM	F	CELL-LINE	MCF7	334.327
S(SC(=S)N(CC)CC)(=O)(=O)c1ccc([N+](=O)[O-])cc1	GI50	=	6	uM	F	CELL-LINE	MCF7	334.441
S(SC(=S)N(CC)CC)(=O)(=O)c1ccccc1[N+](=O)[O-]	GI50	=	25	uM	F	CELL-LINE	MCF7	334.441
Clc1cc(OC)ccc1\C=C/c1cc(OC)c(OC)c(OC)c1	ED50	=	0.046	uM	F	CELL-LINE	MCF7	334.799
S(=O)(=O)(Nc1ccc(OC)cc1)c1cc(F)c(F)c(F)c1F	GI50	=	0.12	uM	F	CELL-LINE	MCF7	335.277
S(=O)(=O)(Nc1ccc(OC)cc1)c1c(F)c(F)c(F)cc1F	GI50	=	4.5	uM	F	CELL-LINE	MCF7	335.277
Oc1cc2c(n3c(-c4c(CC3CCCC)cc(O)cc4)c2C=O)cc1	IC50	=	0.65	uM	F	CELL-LINE	MCF7	335.403
Oc1cc2CC(n3c(-c2cc1)c(c1c3cc(O)cc1)C=O)CCCC	IC50	=	0.22	uM	F	CELL-LINE	MCF7	335.403
Fc1c(OC)c(F)c2OC(=CC(=O)c2c1N)c1cc(F)c(N)cc1	IC50	=	0.1	uM	F	CELL-LINE	MCF7	336.269
Fc1c(CO)c(F)c2OC(=CC(=O)c2c1N)c1cc(F)c(N)cc1	IC50	=	0.062	uM	F	CELL-LINE	MCF7	336.269
Fc1c(C[NH3+])c(F)c2OC(=CC(=O)c2c1N)c1cc(F)c(N)cc1	IC50	=	0.026	uM	F	CELL-LINE	MCF7	336.293
O1c2c(C(=O)C=C1c1ccc(NCCCCCC)cc1)c(N)ccc2	IC50	=	0.44	uM	F	CELL-LINE	MCF7	336.435
s1c(ccc1[N+](=O)[O-])\C=C(/C#N)\c1nc([nH]n1)Cc1ccccc1	IC50	=	0.42	uM	F	CELL-LINE	MCF7	337.363
O(CCCCCC\N=C(\Nc1cccnc1)/NC#N)c1ccccc1	IC50	=	0.23	uM	F	CELL-LINE	MCF7	337.427
s1c2c(-c3c(N(CCC[NH+](C)C)C2=O)cccc3)c2c1cccc2	IC50	=	4.27	uM	F	CELL-LINE	MCF7	337.467
O1c2c(c(O)c(O)c(OC\C=C(\C)/C)c2)C(=O)C=C1c1ccccc1	GI50	=	11.2	uM	F	CELL-LINE	MCF7	338.359
O(CCCCCC\N=C(\Nc1cc[nH+]cc1)/NC#N)c1ccccc1	IC50	=	0.03	uM	F	CELL-LINE	MCF7	338.435
Ic1ccc(NC(=O)N[C@H](CCl)C)cc1	IC50	=	93	uM	F	CELL-LINE	MCF7	338.576
Ic1ccc(NC(=O)N[C@@H](CCl)C)cc1	IC50	=	3.2	uM	F	CELL-LINE	MCF7	338.576
O(C)c1c(OC)cc(cc1OC)C(=C)c1c2c([nH]c1)cc(OC)cc2	IC50	=	0.006	uM	F	CELL-LINE	MCF7	339.391
O(C)c1c(OC)cc(cc1OC)C(n1c2c(cc(OC)cc2)cc1)=C	IC50	=	8.723	uM	F	CELL-LINE	MCF7	339.391
Clc1cc(ccc1NS(=O)(=O)[O-])-c1sc2c(n1)cccc2	IC50	=	0.42	uM	F	CELL-LINE	MCF7	339.803
O1C[C@]1(C)[C@@H]1Oc2cc(OC)c3c(Oc4c(cccc4O)C3=O)c2C1	IC50	=	0.57	uM	F	CELL-LINE	MCF7	340.331
s1c2c(nc1-c1cc(C)c(N(OC(=O)C)C(=O)C)cc1)cccc2	IC50	=	0.055	uM	F	CELL-LINE	MCF7	340.403
S1c2c(cccc2)C(=O)c2nc(NC(=O)C[NH+]3CCCC3)ccc12	IC50	=	27.2	uM	F	CELL-LINE	MCF7	340.427
OCCCNc1nc(NCc2ccccc2)c2ncn(c2n1)C(C)C	IC50	=	28	uM	F	CELL-LINE	MCF7	340.431
s1c2c(nc1-c1cc(C#C[Si](C)(C)C)c(N)cc1)cc(F)cc2	GI50	=	0.16	uM	F	CELL-LINE	MCF7	340.497
s1c2c(nc1-c1cc(C#C[Si](C)(C)C)c(N)cc1)c(F)ccc2	GI50	=	0.52	uM	F	CELL-LINE	MCF7	340.497
s1c2cc(F)ccc2nc1-c1cc(C#C[Si](C)(C)C)c(N)cc1	GI50	=	0.68	uM	F	CELL-LINE	MCF7	340.497
Clc1c(F)c(N)c2c(OC(=CC2=O)c2cc(F)c(N)cc2)c1F	IC50	=	0.21	uM	F	CELL-LINE	MCF7	340.688
O1CC(=C(c2cc(OC)c(OC)c(OC)c2)C1=O)c1ccc(N)cc1	ED50	=	0.033	uM	F	CELL-LINE	MCF7	341.363
O(C)c1c(OC)cc(cc1OC)C(=O)c1c2c([nH]c1)cc(OC)cc2	IC50	=	0.007	uM	F	CELL-LINE	MCF7	341.363
O(C)c1c(OC)cc(cc1OC)C(=O)c1c2c([nH]c1)c(OC)ccc2	IC50	=	4.772	uM	F	CELL-LINE	MCF7	341.363
O(C)c1c(OC)cc(cc1OC)C(=O)n1c2c(cc(OC)cc2)cc1	IC50	=	0.59	uM	F	CELL-LINE	MCF7	341.363
O(C)c1c(OC)cc(cc1OC)C(=O)c1c2c([nH]c1)cccc2OC	IC50	=	9.057	uM	F	CELL-LINE	MCF7	341.363
O(C)c1c(OC)cc(cc1OC)C(=O)c1c2cc(OC)ccc2[nH]c1	IC50	=	0.639	uM	F	CELL-LINE	MCF7	341.363
O(C)c1ccc(cc1)\C(=C(/C#N)\c1ccccc1)\c1ccc(OC)cc1	EC50	=	0.102	uM	F	CELL-LINE	MCF7	341.41
S=C1N(c2c(C=C1c1ccc(OC)cc1)c(OC)cc(OC)c2)C	IC50	=	10	uM	F	CELL-LINE	MCF7	341.431
S1C2=C(C3(NC(=O)N(CCC)C3=O)C1)C(=O)c1c(cccc1)C2=O	IC50	=	0.104	uM	F	CELL-LINE	MCF7	342.375
O(C)C1=CC=CC(=CC1=O)C1c2c(cc(OC)c(OC)c2OC)CC1	GI50	=	75	uM	F	CELL-LINE	MCF7	342.391
O(CC1=Nc2c(N(C)C1=O)cccc2)c1ccc(cc1)-c1ccccc1	IC50	=	30	uM	F	CELL-LINE	MCF7	342.398
O1c2c(C(=O)C=C1c1ccc(NCc3ccccc3)cc1)c(N)ccc2	IC50	=	4.3	uM	F	CELL-LINE	MCF7	342.398
P(=O)([O-])([O-])[C@@H]1O[C@H](Cn2c3nc(nc(O)c3nc2)N)[C@@H](OC)C1	IC50	=	5.6	uM	F	CELL-LINE	MCF7	343.236
O(C)c1c(OC)cc(cc1OC)/C(=C\c1ccc(OC)cc1)/C(=O)[O-]	ED50	=	12.8	uM	F	CELL-LINE	MCF7	343.355
O(C)c1c(OC)cc(cc1OC)\C=C(\C(=O)[O-])/c1ccc(OC)cc1	ED50	=	1.9	uM	F	CELL-LINE	MCF7	343.355
O(C)c1c(OC)cc(cc1OC)Cc1nc2c(ncnc2N)n1CC	IC50	=	79.4328	uM	F	CELL-LINE	MCF7	343.387
O=C(NC1CCCC1)C(NC(=O)n1nnc2c1cccc2)C(CC)C	IC50	=	63.7	uM	F	CELL-LINE	MCF7	343.431
O=C(NC1CCCCC1)C(NC(=O)n1nnc2c1cccc2)C(C)C	IC50	=	79.3	uM	F	CELL-LINE	MCF7	343.431
S1C2=C(C3(NC(=O)N(CCO)C3=O)C1)C(=O)c1c(cccc1)C2=O	IC50	=	0.069	uM	F	CELL-LINE	MCF7	344.347
S1C2=C(C3(NC(=O)N(CC[NH3+])C3=O)C1)C(=O)c1c(cccc1)C2=O	IC50	=	0.031	uM	F	CELL-LINE	MCF7	344.371
S(SC(=S)N(CC)CC)(=O)(=O)c1ccc(NC(=O)C)cc1	GI50	=	18	uM	F	CELL-LINE	MCF7	346.496
Fc1c(N=[N+]=[N-])c(F)c2OC(=CC(=O)c2c1N)c1cc(F)c(N)cc1	IC50	=	0.46	uM	F	CELL-LINE	MCF7	347.256
Oc1c2c(ncc1)C(=O)c1nccc(c1C2=O)-c1ccccc1[N+](=O)[O-]	IC50	=	3.9	uM	F	CELL-LINE	MCF7	347.286
O=C1c2c(nccc2-c2ccccc2[N+](=O)[O-])C(=O)c2[nH+]ccc(N)c12	IC50	=	3.1	uM	F	CELL-LINE	MCF7	347.31
O(CC(=O)[O-])c1ccc(cc1)C(Cc1ccccc1)c1ccc(O)cc1	IC50	=	0.6	uM	F	CELL-LINE	MCF7	347.39
O1CC[NH+](CC1)CCNC(=O)c1cc2N=NN(C)C(=O)N(c2cc1)C	IC50	=	80	uM	F	CELL-LINE	MCF7	347.399
S(=O)(=O)(N)c1ccc(cc1)CNSC(=S)N1CCOCC1	GI50	=	0.03	uM	F	CELL-LINE	MCF7	347.484
O1CC2=C(C=C3N(Cc4c3nc3c(c4)cccc3)C2=O)[C@@](O)(CC)C1=O	IC50	=	0.32	uM	F	CELL-LINE	MCF7	348.358
Oc1cc2c(n3c(-c4c(CC3CCCC)cc(O)cc4)c2C#N)cc1O	IC50	=	2.7	uM	F	CELL-LINE	MCF7	348.402
Oc1ccc(O)cc1CNc1ccc(cc1)C(=O)NCc1ccccc1	IC50	=	16	uM	F	CELL-LINE	MCF7	348.402
S(=O)(=O)(C)c1cc2[C@@H]3[C@H]([C@@H]4CCC(=O)[C@]4(CC3)C)CCc2cc1O	GI50	=	66	uM	F	CELL-LINE	MCF7	348.463
Brc1ccc(cc1)\C=C\c1cc(OC)c(OC)c(OC)c1	ED50	=	9.14	uM	F	CELL-LINE	MCF7	349.224
Brc1ccc(cc1)\C=C/c1cc(OC)c(OC)c(OC)c1	ED50	=	0.016	uM	F	CELL-LINE	MCF7	349.224
Brc1cc2[C@@H]3[C@H]([C@@H]4CCC(=O)[C@]4(CC3)C)CCc2cc1O	GI50	=	33	uM	F	CELL-LINE	MCF7	349.268
Fc1c(N(C)C)c(F)c2OC(=CC(=O)c2c1N)c1cc(F)c(N)cc1	IC50	=	0.039	uM	F	CELL-LINE	MCF7	349.312
Oc1cc2CC(n3c(-c2cc1)c(c1c3cc(O)cc1)C(=O)C)CCCC	IC50	=	2.5	uM	F	CELL-LINE	MCF7	349.43
S(Oc1cc2CC[C@H]3[C@@H]4CCC(=O)[C@]4(CC[C@@H]3c2cc1)C)(=O)(=O)N	IC50	=	22.8	uM	F	CELL-LINE	MCF7	349.451
Oc1cc2c(c3c4c([nH]c3cc2)c(cnc4NCCC[NH+](C)C)C)cc1	IC50	=	1	uM	F	CELL-LINE	MCF7	349.458
Fc1c(COC)c(F)c2OC(=CC(=O)c2c1N)c1cc(F)c(N)cc1	IC50	=	0.046	uM	F	CELL-LINE	MCF7	350.296
O1c2c3c(ccc2)cccc3OC12[C@@]13O[C@@]1(CCCC3=O)C(=O)[C@@H]1O[C@@H]12	IC50	=	4.6	uM	F	CELL-LINE	MCF7	350.326
O1c2c3c(ccc2)cccc3OC12[C@]13O[C@]1(CCCC3=O)C(=O)[C@@H]1O[C@@H]12	IC50	=	2.8	uM	F	CELL-LINE	MCF7	350.326
O(C)c1cc(OC)cc2N(CC#N)C(=O)C(=Cc12)c1ccc(OC)cc1	IC50	=	10	uM	F	CELL-LINE	MCF7	350.374
O(C)c1cc2c3c([n+](cc2cc1OC)C)c1cc(OC)c(O)cc1cc3	IC50	=	4	uM	F	CELL-LINE	MCF7	350.394
S(=O)(=O)(Nc1cc(C)c(cc1)C)c1c(F)c(F)c(F)c(F)c1F	GI50	=	0.12	uM	F	CELL-LINE	MCF7	351.295
O=C1N2[C@H](CCC2)C(=O)N[C@H]1Cc1c2c([nH]c1C\C=C(\C)/C)cccc2	GI50	=	15.9	uM	F	CELL-LINE	MCF7	351.45
O(CCCCCCC\N=C(\Nc1cccnc1)/NC#N)c1ccccc1	IC50	=	0.042	uM	F	CELL-LINE	MCF7	351.454
S(Oc1cc2CC[C@H]3[C@@H]4CC[C@H](O)[C@]4(CC[C@@H]3c2cc1)C)(=O)(=O)N	GI50	=	0.36	uM	F	CELL-LINE	MCF7	351.467
s1c2c(-c3c(N(CCC[NH+](C)C)C2=O)cccc3)c2c1cc(cc2)C	IC50	=	4.5	uM	F	CELL-LINE	MCF7	351.494
Clc1c(F)c(F)c(S(=O)(=O)Nc2ccc(OC)cc2)cc1F	GI50	=	44	uM	F	CELL-LINE	MCF7	351.732
S(C)c1c(F)c(N)c2c(OC(=CC2=O)c2cc(F)c(N)cc2)c1F	IC50	=	0.19	uM	F	CELL-LINE	MCF7	352.336
O(CCCCCCC\N=C(\Nc1cc[nH+]cc1)/NC#N)c1ccccc1	IC50	=	0.014	uM	F	CELL-LINE	MCF7	352.462
Ic1ccc(NC(=O)N[C@@H](CC)CCl)cc1	IC50	=	80	uM	F	CELL-LINE	MCF7	352.603
Ic1ccc(NC(=O)N[C@H](CC)CCl)cc1	IC50	=	52	uM	F	CELL-LINE	MCF7	352.603
S(=O)(=O)(Nc1ccc(OC)cc1)c1c(F)c(F)c(F)c(F)c1F	GI50	=	0.029	uM	F	CELL-LINE	MCF7	353.267
O(C(=O)C)c1ccc(cc1)C1=Cc2c(N(C)C1=O)cc(OC)cc2OC	IC50	=	10	uM	F	CELL-LINE	MCF7	353.374
O(C(C[NH+](C\C=C/C[NH3+])C)CO)C(n1c2ncnc(N)c2nc1)CO	IC50	=	63	uM	F	CELL-LINE	MCF7	353.427
O1c2c3c(ccc2)cccc3OC12C=CC(=O)c1c2cccc1OCC#C	IC50	=	4.3	uM	F	CELL-LINE	MCF7	354.361
O(CC1=Nc2c(N(C)C1=O)cccc2)c1ccc(cc1OC)C(OC)=O	IC50	=	71	uM	F	CELL-LINE	MCF7	354.362
O=C(NC(c1ccccc1)c1ccccc1)C(NC(=O)N[O-])C(CC)C	IC50	=	17.8	uM	F	CELL-LINE	MCF7	354.43
S1c2c(cccc2)C(=O)c2nc(NC(=O)C[NH+]3CCCCC3)ccc12	IC50	=	19.4	uM	F	CELL-LINE	MCF7	354.454
S1c2c(cccc2)C(=O)c2nc(NC(=O)CC[NH+]3CCCC3)ccc12	IC50	=	17	uM	F	CELL-LINE	MCF7	354.454
OC[C@H](Nc1nc(NCc2ccccc2)c2ncn(c2n1)C(C)C)CC	IC50	=	11.1	uM	F	CELL-LINE	MCF7	354.458
O(CC[NH+](C)C)c1ccc(cc1)\C(=C\CCCCC)\c1ccc(O)cc1	IC50	=	2.9	uM	F	CELL-LINE	MCF7	354.514
O(CC[NH+](CC)CC)c1ccc(cc1)\C(=C/C(C)C)\c1ccc(O)cc1	IC50	=	9.2	uM	F	CELL-LINE	MCF7	354.514
O(CC[NH+](CC)CC)c1ccc(cc1)\C(=C\C(C)C)\c1ccc(O)cc1	IC50	=	8.4	uM	F	CELL-LINE	MCF7	354.514
O(CC[NH+](C)C)c1ccc(cc1)\C(=C/CCCCC)\c1ccc(O)cc1	IC50	=	8.5	uM	F	CELL-LINE	MCF7	354.514
O=C1c2ncc(cc2-c2nc3c(c4c2c1ncc4)cccc3)C(OCC)=O	IC50	=	0.7	uM	F	CELL-LINE	MCF7	355.353
O(C)c1c(OC)cc(cc1OC)C(=O)c1c2cc(OC)ccc2[nH]c1C	IC50	=	0.05	uM	F	CELL-LINE	MCF7	355.39
O(C)c1c(OC)cc(cc1OC)C(=O)c1c2c([nH]c1)cc(OCC)cc2	IC50	=	0.001	uM	F	CELL-LINE	MCF7	355.39
O(C)c1c(OC)cc(cc1OC)C(=O)n1c2cc(OC)ccc2cc1C	IC50	=	7.908	uM	F	CELL-LINE	MCF7	355.39
O(C)c1c(OC)cc(cc1OC)C(=O)n1c2c(cc1C)cc(OC)cc2	IC50	=	0.028	uM	F	CELL-LINE	MCF7	355.39
O(C)c1c(OC)cc(cc1OC)C(=O)c1c2c([nH]c1C)cc(OC)cc2	IC50	=	0.0009	uM	F	CELL-LINE	MCF7	355.39
O(C)c1cc2c(N=C[C@H]3N(C=C(C3)\C=C\C(=O)N(C)C)C2=O)cc1OC	GI50	=	0.00715	uM	F	CELL-LINE	MCF7	355.394
O(C(C)C)c1ccc(cc1)\C(=C(/C#N)\c1ccccc1)\c1ccc(O)cc1	EC50	=	0.00012	uM	F	CELL-LINE	MCF7	355.437
O(C(C)C)c1ccc(cc1)\C(=C(\C#N)/c1ccccc1)\c1ccc(O)cc1	EC50	=	0.00018	uM	F	CELL-LINE	MCF7	355.437
s1c2c(-c3c(N(CCC[NH+](C)C)C2=O)cccc3)c2c1cc(F)cc2	IC50	=	4.6	uM	F	CELL-LINE	MCF7	355.457
S(C)[C@]12N(CCCc3c1cccc3OC)C(=O)[C@H]2Oc1ccccc1	IC50	=	33	uM	F	CELL-LINE	MCF7	355.458
O1CC(=C(c2cc(OC)c(OC)c(OC)c2)C1=O)c1ccc(OC)cc1	ED50	=	0.0222	uM	F	CELL-LINE	MCF7	356.374
O1CC(=C(c2cc(OC)c(OC)c(OC)c2)C1=O)c1cc(OC)ccc1	ED50	=	2.5	uM	F	CELL-LINE	MCF7	356.374
O1c2c3c(ccc2)cccc3OC12C=CC(=O)c1c2cccc1OCC=C	IC50	=	2	uM	F	CELL-LINE	MCF7	356.377
O(C)c1c(OC)cc(N(C)c2nc3c(nc(nc3N)N)cc2)cc1OC	GI50	=	0.04	uM	F	CELL-LINE	MCF7	356.386
S1C2=C(C3(NC(=O)N(CCCC)C3=O)C1)C(=O)c1c(cccc1)C2=O	IC50	=	0.178	uM	F	CELL-LINE	MCF7	356.402
S1C2=C(C3(NC(=O)N(C(C)(C)C)C3=O)C1)C(=O)c1c(cccc1)C2=O	IC50	=	0.331	uM	F	CELL-LINE	MCF7	356.402
S1C2=C(C3(NC(=O)N(C(CC)C)C3=O)C1)C(=O)c1c(cccc1)C2=O	IC50	=	0.178	uM	F	CELL-LINE	MCF7	356.402
O(CC1=Nc2c(N(C)C1=O)cccc2)c1ccccc1Cc1ccccc1	IC50	=	8.1	uM	F	CELL-LINE	MCF7	356.425
Oc1cc(ccc1)CNc1nc(nc2n(cnc12)C(C)C)NCCCO	IC50	=	14.7	uM	F	CELL-LINE	MCF7	356.43
Oc1ccc(cc1)CNc1nc(nc2n(cnc12)C(C)C)NCCCO	IC50	=	12.7	uM	F	CELL-LINE	MCF7	356.43
Oc1ccccc1CNc1nc(nc2n(cnc12)C(C)C)NCCCO	IC50	=	12.4	uM	F	CELL-LINE	MCF7	356.43
S1c2c(cccc2)C(=O)c2nc(NC(=O)CC[NH+](CC)CC)ccc12	IC50	=	13.3	uM	F	CELL-LINE	MCF7	356.47
SCC(=O)NCCCCCNC(=O)c1ccc(cc1)-c1ccccc1	IC50	=	125	uM	F	CELL-LINE	MCF7	356.49
o1c(c(nc1O)-c1cc(OC)c(OC)c(OC)c1)-c1ccc(OC)cc1	IC50	=	0.0284	uM	F	CELL-LINE	MCF7	357.362
O1C=C(N(c2cc(OC)c(OC)c(OC)c2)C1=O)c1ccc(OC)cc1	IC50	=	0.0105	uM	F	CELL-LINE	MCF7	357.362
O(C)c1c(OC)cc(cc1OC)/C(=C\c1ccc(OC)cc1)/C(=O)NC	ED50	=	5	uM	F	CELL-LINE	MCF7	357.406
O(CC1=Nc2c(N(C)C1=O)cccc2)c1cc(Nc2ccccc2)ccc1	IC50	=	25	uM	F	CELL-LINE	MCF7	357.413
O(C)c1c(OC)cc(cc1OC)Cc1nc2c(ncnc2N)n1CCC	IC50	=	46.7735	uM	F	CELL-LINE	MCF7	357.414
O(CC(=O)[O-])c1ccc(cc1)\C(=C(\CC)/c1ccccc1)\c1ccccc1	IC50	=	0.32	uM	F	CELL-LINE	MCF7	357.429
Oc1ccc(cc1)/C(=C(\CC)/c1ccccc1)/c1ccc(cc1)CC(=O)[O-]	IC50	=	0.058	uM	F	CELL-LINE	MCF7	357.429
O=C(NC1CCCCC1)C(NC(=O)n1nnc2c1cccc2)C(CC)C	IC50	=	63.1	uM	F	CELL-LINE	MCF7	357.458
S(C)[C@]12N(CC(Cc3oc(cc13)C)(C)C)C(=O)[C@H]2Oc1ccccc1	IC50	=	47	uM	F	CELL-LINE	MCF7	357.474
o1cc(nc1C(C)(C)C)\C=C/CC\C=C\C=C(\CC[C@@H](OC)CC=C)/C	GI50	=	36	uM	F	CELL-LINE	MCF7	357.538
S1C2=C(C3(NC(=O)N(CCCO)C3=O)C1)C(=O)c1c(cccc1)C2=O	IC50	=	0.04	uM	F	CELL-LINE	MCF7	358.374
O(C)c1c(OC)cc(cc1OC)/C(=C\c1cc(OC)ccc1)/C(OC)=O	ED50	=	1.3	uM	F	CELL-LINE	MCF7	358.39
O(C)c1c(OC)cc(cc1OC)/C(=C\c1ccc(OC)cc1)/C(OC)=O	ED50	=	2	uM	F	CELL-LINE	MCF7	358.39
O(C)c1cc(cc(OC)c1O)\C=C/1\c2c(cccc2)C(=O)c2c\1cccc2	IC50	=	4.13	uM	F	CELL-LINE	MCF7	358.393
O(C)c1c(O)c(OC)ccc1\C=C/1\c2c(cccc2)C(=O)c2c\1cccc2	IC50	=	1.85	uM	F	CELL-LINE	MCF7	358.393
S1C2=C(C3(NC(=O)N(CCC[NH3+])C3=O)C1)C(=O)c1c(cccc1)C2=O	IC50	=	0.025	uM	F	CELL-LINE	MCF7	358.398
Oc1ccc(NCc2cc(O)ccc2O)cc1C(=O)NCCCCCC	IC50	=	11	uM	F	CELL-LINE	MCF7	358.438
O(C)c1c(OC)c2c(cc1OC)C([NH+](CC2)C)Cc1ccc(OC)cc1	ED50	=	22.7	uM	F	CELL-LINE	MCF7	358.458
Clc1ccc(OCCCCC\N=C(\Nc2cc[nH+]cc2)/NC#N)cc1	IC50	=	0.053	uM	F	CELL-LINE	MCF7	358.853
O(C)c1c(OC)cc(N2C(C(O)C2=O)c2ccc(OC)cc2)cc1OC	IC50	=	0.062	uM	F	CELL-LINE	MCF7	359.378
O1C[C@H](N=C1C(C)(C)C)\C=C/CC\C=C\C=C(\CC[C@@H](OC)CC=C)/C	GI50	=	1.8	uM	F	CELL-LINE	MCF7	359.554
S1C[C@H](N=C1[C@@H]1C[C@@H]1C)\C=C/CC\C=C\C=C\CC[C@@H](OC)CC=C	GI50	=	0.34	uM	F	CELL-LINE	MCF7	359.578
S1CC(N=C1[C@@H]1C[C@@H]1C)\C=C/CC\C=C\C=C(\CC[C@@H](O)CC=C)/C	GI50	=	0.45	uM	F	CELL-LINE	MCF7	359.578
FC(F)(F)c1[nH+]ccc(Nc2ccccc2C(Oc2cccnc2)=O)c1	GI50	=	0.16	uM	F	CELL-LINE	MCF7	360.315
O=C1C2C(C=C(N=C2c2ccccc2)C(OCC)=O)C(=O)c2ncccc12	IC50	=	0.5	uM	F	CELL-LINE	MCF7	360.369
O=C1C2C(C(=NC(=C2)C(OCC)=O)c2ccccc2)C(=O)c2ncccc12	IC50	=	0.3	uM	F	CELL-LINE	MCF7	360.369
O(C)c1c(OC)c(OC)ccc1\C=C\c1cc(OC)c(OC)c(OC)c1	ED50	=	14.72	uM	F	CELL-LINE	MCF7	360.406
O(C)c1c(OC)cc(cc1OC)CCc1ccc(OCC[NH+](C)C)cc1	ED50	=	10.3	uM	F	CELL-LINE	MCF7	360.474
ClCCNc1cc2c3c4c(nc2cc1)C(=O)c1c(nccc1)-c4ncc3	IC50	=	0.01	uM	F	CELL-LINE	MCF7	360.804
Clc1ccc(NC(OCC#C)=O)cc1-c1oc2c(n1)cc(Cl)cc2	IC50	=	15	uM	F	CELL-LINE	MCF7	361.184
O(C)c1c2c(ncc1)C(=O)c1nccc(c1C2=O)-c1ccccc1[N+](=O)[O-]	IC50	=	0.05	uM	F	CELL-LINE	MCF7	361.313
S(=O)(=O)(N)c1ccc(cc1)CCNSC(=S)N1CCOCC1	GI50	=	0.026	uM	F	CELL-LINE	MCF7	361.511
Brc1c-2c(ncc1)C(=O)c1nccc3c1c-2nc1c3cccc1	IC50	=	1.1	uM	F	CELL-LINE	MCF7	362.186
Brc1cc2nc3c4c(nccc4c2cc1)-c1ncccc1C3=O	IC50	=	0.09	uM	F	CELL-LINE	MCF7	362.186
Brc1cc2c3c4c(nc2cc1)C(=O)c1c(nccc1)-c4ncc3	IC50	=	0.05	uM	F	CELL-LINE	MCF7	362.186
S(=O)(=O)(Nc1cc2c([nH]cc2)cc1)c1c(F)c(F)c(F)c(F)c1F	GI50	=	0.028	uM	F	CELL-LINE	MCF7	362.278
Fc1c(CCCC)c(F)c2OC(=CC(=O)c2c1N)c1cc(F)c(N)cc1	IC50	=	8.8	uM	F	CELL-LINE	MCF7	362.351
O1CC2=C(C=C3N(Cc4c3nc3c(c4)cccc3)C2=O)C(O)(CC1=O)CC	IC50	=	0.021	uM	F	CELL-LINE	MCF7	362.385
Oc1ccc(O)cc1CNc1cc(ccc1)C(=O)NCCc1ccccc1	IC50	=	5	uM	F	CELL-LINE	MCF7	362.429
Oc1ccc(O)cc1CNc1ccc(cc1)C(=O)NCCc1ccccc1	IC50	=	3	uM	F	CELL-LINE	MCF7	362.429
O=C(N1CCCCC1)C(NC(=O)n1nnc2c1cccc2)c1ccccc1	IC50	=	67.4	uM	F	CELL-LINE	MCF7	363.421
S(Oc1cc2CC[C@H]3[C@@H]4CCC(=O)[C@]4(CC[C@@H]3c2cc1C)C)(=O)(=O)N	GI50	=	0.26	uM	F	CELL-LINE	MCF7	363.478
Fc1c(C[NH+](C)C)c(F)c2OC(=CC(=O)c2c1N)c1cc(F)c(N)cc1	IC50	=	0.072	uM	F	CELL-LINE	MCF7	364.347
O(C)c1cc(OC)cc2N(CCC#N)C(=O)C(=Cc12)c1ccc(OC)cc1	IC50	=	10	uM	F	CELL-LINE	MCF7	364.401
Oc1ccc(NCc2cc(O)ccc2O)cc1C(=O)NCc1ccccc1	IC50	=	17	uM	F	CELL-LINE	MCF7	364.401
s1nc(cc1[N-]C(=O)C(=O)c1c2c(n(c1)Cc1occc1)cccc2)C	IC50	=	0.397	uM	F	CELL-LINE	MCF7	364.405
s1nc(cc1[N-]C(=O)C(=O)c1c2c(n(c1)Cc1ccoc1)cccc2)C	IC50	=	0.879	uM	F	CELL-LINE	MCF7	364.405
O(C)c1c2c3N(CCC2=O)C(=O)C(=Cc3c(OC)c1)c1ccc(OC)cc1	IC50	=	10	uM	F	CELL-LINE	MCF7	365.385
s1nc(cc1[N-]C(=O)C(=O)c1c2c(n(c1)Cc1oncc1)cccc2)C	IC50	=	2.333	uM	F	CELL-LINE	MCF7	365.393
O=C(NCc1ccccc1)C(NC(=O)n1nnc2c1cccc2)C(CC)C	IC50	=	69.2	uM	F	CELL-LINE	MCF7	365.437
S(C[C@H](NC(=O)C)\C=C/CC\C=C\C=C(\CC[C@@H](OC)CC=C)/C)C	GI50	=	5.2	uM	F	CELL-LINE	MCF7	365.582
Clc1c2c(ncc1)C(=O)c1nccc(c1C2=O)-c1ccccc1[N+](=O)[O-]	IC50	=	1.8	uM	F	CELL-LINE	MCF7	365.732
S(=O)(=O)(Nc1ccc(N(C)C)cc1)c1c(F)c(F)c(F)c(F)c1F	GI50	=	0.034	uM	F	CELL-LINE	MCF7	366.31
O1c2c3c(ccc2)cccc3OC12[C@@]13O[C@@]1([C@@H](O)C=CC3=O)[C@@H](O)[C@H]1O[C@H]12	IC50	=	1.5	uM	F	CELL-LINE	MCF7	366.325
O1c2c(CCC1(CO)C)c(C)c(OC(=O)[C@@H]([NH3+])CCCC[NH3+])c(C)c2C	IC50	=	194	uM	F	CELL-LINE	MCF7	366.502
s1c2c(-c3c(N(CCC[NH+](C)C)C2=O)cccc3)c2c1cc(OC)cc2	IC50	=	2.2	uM	F	CELL-LINE	MCF7	367.493
N(C)(C)c1ccc(cc1)\C(=C(/C#N)\c1ccccc1)\c1ccc(N(C)C)cc1	EC50	=	0.012	uM	F	CELL-LINE	MCF7	367.496
P(=O)([O-])([O-])[C@@H]1O[C@H](Cn2c3nc(nc(NC4CC4)c3nc2)N)[C@@H](O)C1	IC50	=	48	uM	F	CELL-LINE	MCF7	368.29
FC(F)(F)c1[nH+]ccc(Nc2ccccc2C(=O)NCC(OCC)=O)c1	GI50	=	25	uM	F	CELL-LINE	MCF7	368.335
S(=O)(C)c1c(F)c(N)c2c(OC(=CC2=O)c2cc(F)c(N)cc2)c1F	IC50	=	2.5	uM	F	CELL-LINE	MCF7	368.335
O(C)c1cc(OC)cc2N(CC(=O)[O-])C(=O)C(=Cc12)c1ccc(OC)cc1	IC50	=	10	uM	F	CELL-LINE	MCF7	368.365
Fc1ccccc1C=1Oc2c(C(=O)C=1)c(O)cc(O)c2C=1CC[NH+](CC=1)C	IC50	=	1	uM	F	CELL-LINE	MCF7	368.384
O=C1c2c(C(=O)c3c1cccc3)c(N)ccc2NCC(O)C[NH+](CC)CC	IC50	=	6	uM	F	CELL-LINE	MCF7	368.457
O(CCCCCC\N=C(\Nc1cc[nH+]cc1)/NC#N)c1ccccc1OC	IC50	=	0.0011	uM	F	CELL-LINE	MCF7	368.461
O(CCCCCC\N=C(\Nc1cc[nH+]cc1)/NC#N)c1cc(OC)ccc1	IC50	=	0.0038	uM	F	CELL-LINE	MCF7	368.461
O(CCCCCC\N=C(\Nc1cc[nH+]cc1)/NC#N)c1ccc(OC)cc1	IC50	=	0.037	uM	F	CELL-LINE	MCF7	368.461
S1c2c(cccc2)C(=O)c2nc(NC(=O)CC[NH+]3CCCCC3)ccc12	IC50	=	15.9	uM	F	CELL-LINE	MCF7	368.481
OCC(Nc1nc(NCc2ccccc2)c2nc(n(c2n1)C(C)C)C)CC	IC50	=	94	uM	F	CELL-LINE	MCF7	368.485
O(CC[NH+](CC)CC)c1ccc(cc1)\C(=C/CCCC)\c1ccc(O)cc1	IC50	=	4.4	uM	F	CELL-LINE	MCF7	368.541
O(CC[NH+](CC)CC)c1ccc(cc1)\C(=C\CCCC)\c1ccc(O)cc1	IC50	=	2.9	uM	F	CELL-LINE	MCF7	368.541
O(C)c1c(OC)cc(cc1OC)C(=O)c1c2c([nH]c1)cc(OCCC)cc2	IC50	=	0.052	uM	F	CELL-LINE	MCF7	369.417
O(C)c1c(OC)cc(cc1OC)C(=O)c1c2c([nH]c1)cc(OC(C)C)cc2	IC50	=	0.04	uM	F	CELL-LINE	MCF7	369.417
O(C)c1c(OC)cc(cc1OC)Cc1nc2c(ncnc2N)n1C\C=C\C	IC50	=	51.2861	uM	F	CELL-LINE	MCF7	369.425
O(C)c1c(OC)cc(cc1OC)Cc1nc2c(ncnc2N)n1CCC=C	IC50	=	40.738	uM	F	CELL-LINE	MCF7	369.425
O(C)c1c(OC)cc(cc1OC)Cc1nc2c(ncnc2N)n1CC1CC1	IC50	=	75.8578	uM	F	CELL-LINE	MCF7	369.425
OCC(Nc1nc(NCc2ccccc2)c2nc(n(c2n1)C(C)C)N)CC	IC50	=	60	uM	F	CELL-LINE	MCF7	369.473
O1CC(=C(c2cc(OC)c(OC)c(OC)c2)C1=O)c1cc2OCOc2cc1	ED50	=	0.0804	uM	F	CELL-LINE	MCF7	370.357
O1c2c3c(ccc2)cccc3OC12C=CC(=O)c1c2cccc1OC\C=C\C	IC50	=	1.3	uM	F	CELL-LINE	MCF7	370.404
O1c2c3c(ccc2)cccc3OC12C=CC(=O)c1c2cccc1OCC(C)=C	IC50	=	7.8	uM	F	CELL-LINE	MCF7	370.404
O=C1c2c(nccc2)-c2nccc3c2c1nc1c3cc(NCC[NH+](C)C)cc1	IC50	=	0.03	uM	F	CELL-LINE	MCF7	370.436
S1c2c(cccc2)C(=O)c2nc(NC(=O)CC[NH+]3CCOCC3)ccc12	IC50	=	49.8	uM	F	CELL-LINE	MCF7	370.453
Oc1ccc(cc1)CNc1nc(nc2n(cnc12)C(C)C)NC(CC)CO	IC50	=	7.8	uM	F	CELL-LINE	MCF7	370.457
Oc1cc(ccc1)CNc1nc(nc2n(cnc12)C(C)C)NC(CC)CO	IC50	=	13.7	uM	F	CELL-LINE	MCF7	370.457
Oc1ccccc1CNc1nc(nc2n(cnc12)C(C)C)N[C@H](CC)CO	IC50	=	5.3	uM	F	CELL-LINE	MCF7	370.457
Oc1nc2c(nc(nc2NCc2ccccc2)NC(CC)CO)n1C(C)C	IC50	=	65	uM	F	CELL-LINE	MCF7	370.457
[NH3+]C1CCC(Nc2nc(NCC3CC3)c3ncn(c3n2)C2CCCC2)CC1	IC50	=	1.3	uM	F	CELL-LINE	MCF7	370.525
O1CC(=C(c2cc(OC)c(OC)c(OC)c2)C1=O)c1ccc([N+](=O)[O-])cc1	ED50	=	3.3	uM	F	CELL-LINE	MCF7	371.345
O1C=C(N(c2cc(OC)c(OC)c(OC)c2)C1=O)c1cc2OCOc2cc1	ED50	=	0.0645	uM	F	CELL-LINE	MCF7	371.345
o1c(c(nc1O)-c1cc(OC)c(OC)c(OC)c1)-c1cc2OCOc2cc1	IC50	=	0.0785	uM	F	CELL-LINE	MCF7	371.345
O1CC(=C(c2cc(OC)c(OC)c(OC)c2)C1=O)c1cc(N)c(OC)cc1	ED50	=	0.0047	uM	F	CELL-LINE	MCF7	371.389
O(C)c1c(OC)cc(cc1OC)C(=O)c1c2cc(OC)c(OC)cc2[nH]c1	IC50	=	9.242	uM	F	CELL-LINE	MCF7	371.389
O(C)c1c(OC)cc(cc1OC)/C(=C\c1ccc(OC)cc1)/C(=O)NCC	ED50	=	3.7	uM	F	CELL-LINE	MCF7	371.433
O(C)c1c(OC)cc(cc1OC)Cc1nc2c(ncnc2N)n1CCCC	IC50	=	50.1187	uM	F	CELL-LINE	MCF7	371.441
O(C)c1c(OC)cc(cc1OC)Cc1nc2c(ncnc2N)n1CC(C)C	IC50	=	97.7237	uM	F	CELL-LINE	MCF7	371.441
O(CC(=O)[O-])c1ccc(cc1)/C(=C(/CC)\c1ccccc1)/c1ccc(cc1)C	IC50	=	0.097	uM	F	CELL-LINE	MCF7	371.456
Oc1ccc(cc1C[NH+](C)C)\C(=C(/C#N)\c1ccccc1)\c1ccc(O)cc1	EC50	=	0.014	uM	F	CELL-LINE	MCF7	371.46
s1cc(nc1[C@@H]1C[C@@H]1C)\C=C/CC\C=C\C=C(\CC[C@@H](OC)CC=C)/C	GI50	=	0.3	uM	F	CELL-LINE	MCF7	371.589
O1CC(=C(c2cc(OC)c(OC)c(OC)c2)C1=O)c1cc(O)c(OC)cc1	ED50	=	0.0114	uM	F	CELL-LINE	MCF7	372.373
O1C=C(N(c2cc(OC)c(OC)c(OC)c2)C1=O)c1cc(N)c(OC)cc1	IC50	=	0.0018	uM	F	CELL-LINE	MCF7	372.377
o1c(c(nc1O)-c1cc(OC)c(OC)c(OC)c1)-c1cc(N)c(OC)cc1	IC50	=	0.0049	uM	F	CELL-LINE	MCF7	372.377
Oc1ccc(cc1)-c1nc(n(c1CC)-c1ccc(O)cc1)-c1ccc(O)cc1	EC50	=	0.077	uM	F	CELL-LINE	MCF7	372.424
S1C2=C(C3(NC(=O)N(CCCC[NH3+])C3=O)C1)C(=O)c1c(cccc1)C2=O	IC50	=	0.035	uM	F	CELL-LINE	MCF7	372.425
S1C2=C(C3(NC(=O)N(CC[NH+](C)C)C3=O)C1)C(=O)c1c(cccc1)C2=O	IC50	=	0.032	uM	F	CELL-LINE	MCF7	372.425
O(CC[NH+](C)C)c1ccc(cc1)\C(=C(\CC)/c1ccccc1)\c1ccccc1	IC50	=	0.15	uM	F	CELL-LINE	MCF7	372.532
O(CC[NH+](C)C)c1ccc(cc1)\C(=C(/CC)\c1ccccc1)\c1ccccc1	EC50	=	0.011	uM	F	CELL-LINE	MCF7	372.532
O(C[NH+](C)C)c1ccc(cc1)C\C(=C(\CC)/c1ccccc1)\c1ccccc1	IC50	=	25.06	uM	F	CELL-LINE	MCF7	372.532
O(C[NH+](C)C)c1ccc(cc1)\C(=C(/Cc1ccccc1)\CC)\c1ccccc1	IC50	=	14.94	uM	F	CELL-LINE	MCF7	372.532
O(C[NH+](C)C)c1ccc(cc1)/C(=C(/CC)\c1ccccc1)/Cc1ccccc1	IC50	=	21.66	uM	F	CELL-LINE	MCF7	372.532
O(C[NH+](C)C)c1ccc(cc1)/C(=C(/Cc1ccccc1)\c1ccccc1)/CC	IC50	=	117.17	uM	F	CELL-LINE	MCF7	372.532
Clc1cc(OCCCCCC\N=C(\Nc2cc[nH+]cc2)/NC#N)ccc1	IC50	=	0.0088	uM	F	CELL-LINE	MCF7	372.88
Clc1ccccc1OCCCCCC\N=C(\Nc1cc[nH+]cc1)/NC#N	IC50	=	0.0019	uM	F	CELL-LINE	MCF7	372.88
Clc1ccc(OCCCCCC\N=C(\Nc2cc[nH+]cc2)/NC#N)cc1	IC50	=	0.031	uM	F	CELL-LINE	MCF7	372.88
o1c(c(nc1O)-c1cc(OC)c(OC)c(OC)c1)-c1cc(O)c(OC)cc1	IC50	=	0.0057	uM	F	CELL-LINE	MCF7	373.361
O1C=C(N(c2cc(OC)c(OC)c(OC)c2)C1=O)c1cc(O)c(OC)cc1	IC50	=	0.0029	uM	F	CELL-LINE	MCF7	373.361
O1c2cc(ccc2OC1)C1N(C(=O)C1O)c1cc(OC)c(OC)c(OC)c1	IC50	=	0.5443	uM	F	CELL-LINE	MCF7	373.361
O(C)c1c(OC)cc(cc1OC)Cc1nc2c(ncnc2N)n1CCOC	IC50	=	64.5654	uM	F	CELL-LINE	MCF7	373.413
O(CC(=O)[O-])c1ccc(cc1)\C(=C(\CC)/c1ccccc1)\c1ccc(O)cc1	IC50	=	0.021	uM	F	CELL-LINE	MCF7	373.428
s1c2CC(CN3[C@@](SC)(c2cc1C)[C@H](Oc1ccccc1)C3=O)(C)C	IC50	=	41	uM	F	CELL-LINE	MCF7	373.541
S1C[C@H](N=C1[C@@H]1C[C@@H]1C)\C=C/CC\C=C\C=C(\CC[C@@H](OC)CC=C)/C	GI50	=	0.04	uM	F	CELL-LINE	MCF7	373.605
S1C[C@H](N=C1[C@H]1C[C@H]1C)\C=C/CC\C=C\C=C(\CC[C@@H](OC)CC=C)/C	GI50	=	0.36	uM	F	CELL-LINE	MCF7	373.605
S1C[C@H](N=C1[C@@H]1C[C@@H]1C)\C=C/CC/C=C\C=C(\CC[C@@H](OC)CC=C)/C	GI50	=	0.32	uM	F	CELL-LINE	MCF7	373.605
S1C[C@H](N=C1[C@@H]1C[C@@H]1C)\C=C/CC\C=C\C=C(\CC[C@H](OC)CC=C)/C	GI50	=	0.18	uM	F	CELL-LINE	MCF7	373.605
s1cc(nc1C(C)(C)C)\C=C/CC\C=C\C=C(\CC[C@@H](OC)CC=C)/C	GI50	=	0.32	uM	F	CELL-LINE	MCF7	373.605
S1C[C@H](N=C1CCC=C)\C=C/CC\C=C\C=C(\CC[C@@H](OC)CC=C)/C	GI50	=	0.3	uM	F	CELL-LINE	MCF7	373.605
S1C[C@H](N=C1[C@@H]1C[C@@H]1C)\C=C/CC\C=C\C=C(/CC[C@@H](OC)CC=C)\C	GI50	=	3.6	uM	F	CELL-LINE	MCF7	373.605
S1C[C@H](N=C1[C@H]1C[C@@H]1C)\C=C/CC\C=C\C=C(\CC[C@@H](OC)CC=C)/C	GI50	=	0.99	uM	F	CELL-LINE	MCF7	373.605
O(C)c1c(OC)cc(N2C(C(O)C2=O)c2cc(N)c(OC)cc2)cc1OC	IC50	=	0.05502	uM	F	CELL-LINE	MCF7	374.393
O=C1C2C(C=C(N=C2c2ccc(cc2)C)C(OCC)=O)C(=O)c2ncccc12	IC50	=	1	uM	F	CELL-LINE	MCF7	374.396
O=C1C2C(C(=NC(=C2)C(OCC)=O)c2ccc(cc2)C)C(=O)c2ncccc12	IC50	=	1.6	uM	F	CELL-LINE	MCF7	374.396
O=C(NC(c1ccccc1)c1ccccc1)C(NC(=O)N[O-])c1ccccc1	IC50	=	83.8	uM	F	CELL-LINE	MCF7	374.42
S1CCC(=C1c1cc(O)c(OC)cc1)c1cc(OC)c(OC)c(OC)c1	IC50	=	0.39	uM	F	CELL-LINE	MCF7	374.457
S(C)C1=CC=C2c3c(cc(OC)c(OC)c3OC)CC[C@H]([NH3+])C2=CC1=O	IC50	=	4.2	uM	F	CELL-LINE	MCF7	374.481
O(C[NH+](C)C)c1ccc(cc1)\C(=C(/CC)\c1ccccc1)\c1ccc(O)cc1	IC50	=	0.3	uM	F	CELL-LINE	MCF7	374.504
Fc1nc(N)c2nc(n(c2n1)CCC)Cc1cc(OC)c(OC)c(OC)c1	IC50	=	25.1189	uM	F	CELL-LINE	MCF7	375.404
S1C[C@H](N=C1C(C)(C)C)\C=C/CC\C=C\C=C(\CC[C@@H](OC)CC=C)/C	GI50	=	0.2	uM	F	CELL-LINE	MCF7	375.621
S1C[C@H](N=C1[C@@H]1C[C@@H]1C)\C=C/CC\C=C\C=C(\CC[C@@H](OC)CCC)/C	GI50	=	0.05	uM	F	CELL-LINE	MCF7	375.621
O1CC(=C(c2cc(OC)c(OC)c(OC)c2)C1=O)c1cc2c(cc1)cccc2	ED50	=	0.0091	uM	F	CELL-LINE	MCF7	376.408
O(Cc1cccnc1)C(=O)NCc1ccc(cc1)C(=O)Nc1ccccc1N	IC50	=	5	uM	F	CELL-LINE	MCF7	376.416
O(Cc1ccccc1)c1c(OC)cc(cc1OC)\C=C/c1ccc(OC)cc1	ED50	=	1.92	uM	F	CELL-LINE	MCF7	376.452
Oc1ccc(O)cc1CNc1ccc(cc1)C(=O)NCCCc1ccccc1	IC50	=	0.4	uM	F	CELL-LINE	MCF7	376.456
Brc1c2c3c4c(nc2ccc1N)C(=O)c1c(nccc1)-c4ncc3	IC50	=	0.07	uM	F	CELL-LINE	MCF7	377.201
O1C=C(N(c2cc(OC)c(OC)c(OC)c2)C1=O)c1cc2c(cc1)cccc2	IC50	=	0.0037	uM	F	CELL-LINE	MCF7	377.396
o1c(c(nc1O)-c1cc(OC)c(OC)c(OC)c1)-c1cc2c(cc1)cccc2	IC50	=	0.0167	uM	F	CELL-LINE	MCF7	377.396
S(=O)(=O)(Nc1cc(OC)c(OC)cc1)c1ccc(cc1)\C=C\C(=O)N[O-]	IC50	=	0.7	uM	F	CELL-LINE	MCF7	377.397
S(=O)(=O)(Nc1ccc(cc1)\C=C\C(=O)N[O-])c1cc(OC)c(OC)cc1	IC50	=	1.5	uM	F	CELL-LINE	MCF7	377.397
O=C(NC1CCCC1)C(NC(=O)n1nnc2c1cccc2)Cc1ccccc1	IC50	=	92	uM	F	CELL-LINE	MCF7	377.448
O=C(NC1CCCCC1)C(NC(=O)n1nnc2c1cccc2)c1ccccc1	IC50	=	57.6	uM	F	CELL-LINE	MCF7	377.448
S(Oc1cc2CC[C@H]3[C@@H]4CCC(=O)[C@]4(CC[C@@H]3c2cc1CC)C)(=O)(=O)N	GI50	=	0.34	uM	F	CELL-LINE	MCF7	377.505
S1CC(N=C1[C@@H]1C[C@@H]1C)CCCC\C=C\C=C(\CC[C@@H](OC)CCC)/C	GI50	=	3.3	uM	F	CELL-LINE	MCF7	377.637
Fc1c(COC(=O)C)c(F)c2OC(=CC(=O)c2c1N)c1cc(F)c(N)cc1	IC50	=	0.026	uM	F	CELL-LINE	MCF7	378.306
Fc1c(C(OCC)=O)c(F)c2OC(=CC(=O)c2c1N)c1cc(F)c(N)cc1	IC50	=	1.4	uM	F	CELL-LINE	MCF7	378.306
Fc1c(COCCC)c(F)c2OC(=CC(=O)c2c1N)c1cc(F)c(N)cc1	IC50	=	1.2	uM	F	CELL-LINE	MCF7	378.35
Fc1c(C[N+](C)(C)C)c(F)c2OC(=CC(=O)c2c1N)c1cc(F)c(N)cc1	IC50	=	3.1	uM	F	CELL-LINE	MCF7	378.374
O(C)c1cc(OC)cc2N(CCCC#N)C(=O)C(=Cc12)c1ccc(OC)cc1	IC50	=	10	uM	F	CELL-LINE	MCF7	378.428
Oc1ccc(NCc2cc(O)ccc2O)cc1C(=O)NCCc1ccccc1	IC50	=	9	uM	F	CELL-LINE	MCF7	378.428
O=C(Nc1cc(ccc1)C)N1N=C(N(N=C1C)C(=O)Nc1cc(ccc1)C)C	IC50	=	0.5	uM	F	CELL-LINE	MCF7	378.436
Oc1ccc(NCc2cc(O)ccc2O)cc1C(=O)NCCc1ncccc1	IC50	=	11	uM	F	CELL-LINE	MCF7	379.416
s1nc(cc1[N-]C(=O)C(=O)c1c2c(n(c1)Cc1onc(c1)C)cccc2)C	IC50	=	0.033	uM	F	CELL-LINE	MCF7	379.42
S(Oc1cc2CC[C@H]3[C@@H]4CCC(=O)[C@]4(CC[C@@H]3c2cc1OC)C)(=O)(=O)N	GI50	=	0.3	uM	F	CELL-LINE	MCF7	379.477
S(Oc1cc2CC[C@H]3[C@@H]4CC[C@H](O)[C@]4(CC[C@@H]3c2cc1CC)C)(=O)(=O)N	GI50	=	0.07	uM	F	CELL-LINE	MCF7	379.521
O(C)c1cc(cc(OC)c1)C(=O)NC=1\C(=N\CC)\C(=O)c2c(cccc2)C=1O	GI50	=	0.37154	uM	F	CELL-LINE	MCF7	380.4
O1C[C@H]2N([C@@H](c3[nH]c4c(c3C2)cccc4)c2cc(OC)c(O)c(OC)c2)C1=O	GI50	=	0.25	uM	F	CELL-LINE	MCF7	380.4
S(=O)(=O)(NC)c1ccc(Nc2nc(ccn2)-c2n3c(nc2)C=CC=C3)cc1	IC50	=	0.26	uM	F	CELL-LINE	MCF7	380.432
s1nc(cc1[N-]C(=O)C(=O)c1c2c(n(c1)Cc1ccsc1)cccc2)C	IC50	=	0.338	uM	F	CELL-LINE	MCF7	380.472
s1cccc1Cn1cc(c2c1cccc2)C(=O)C(=O)[N-]c1snc(c1)C	IC50	=	1.188	uM	F	CELL-LINE	MCF7	380.472
s1c2c(c3c(nc2O)cccc3)c2c1cc(cc2)C(=O)NCCC[NH+](C)C	IC50	=	10	uM	F	CELL-LINE	MCF7	380.492
O(CC[NH+]1CCCC1)c1ccc(cc1)\C(=C\CCCCC)\c1ccc(O)cc1	IC50	=	2.9	uM	F	CELL-LINE	MCF7	380.552
S(=O)(=O)(Nc1cc2OCCOc2cc1)c1c(F)c(F)c(F)c(F)c1F	GI50	=	0.43	uM	F	CELL-LINE	MCF7	381.277
Fc1cc2c3N(C=C(C(=O)[O-])C2=O)c2c(Oc3c1N1C[C@@H]([NH3+])CC1)cccc2	IC50	=	0.66	uM	F	CELL-LINE	MCF7	381.363
O(C(=O)C)C1[C@@H](N(C1=O)c1c2c(c3c(c1)cccc3)cccc2)c1ccccc1	IC50	=	10.09	uM	F	CELL-LINE	MCF7	381.431
O(C)c1c(OC)cc(cc1OC)Cc1nc2c(ncnc2N)n1CCCC#C	IC50	=	23.9883	uM	F	CELL-LINE	MCF7	381.436
S1C2=C(n3cc(nc3C=C2)C(=O)NCCC[NH+](C)C)C(=O)c2c1cccc2	IC50	=	11.2	uM	F	CELL-LINE	MCF7	381.48
Ic1cc2CC[C@H]3[C@@H]4CC[C@H](O)[C@]4(CC[C@@H]3c2cc1)C	EC50	=	0.000174	uM	F	CELL-LINE	MCF7	382.285
Ic1cc2[C@@H]3[C@H]([C@@H]4CC[C@H](O)[C@]4(CC3)C)CCc2cc1	EC50	=	0.0017	uM	F	CELL-LINE	MCF7	382.285
Ic1c2CC[C@H]3[C@@H]4CC[C@H](O)[C@]4(CC[C@@H]3c2ccc1)C	EC50	=	0.00167	uM	F	CELL-LINE	MCF7	382.285
s1c2c(-c3c(N(CCC[NH+](C)C)C2=O)cccc3)c2c1cc([N+](=O)[O-])cc2	IC50	=	5.8	uM	F	CELL-LINE	MCF7	382.464
O(CC[NH+](CC)CC)c1ccc(cc1)\C(=C/CCCCC)\c1ccc(O)cc1	IC50	=	2.9	uM	F	CELL-LINE	MCF7	382.568
O(CC[NH+](CC)CC)c1ccc(cc1)\C(=C\CCCCC)\c1ccc(O)cc1	IC50	=	2.7	uM	F	CELL-LINE	MCF7	382.568
O(CCCCCC\N=C(\Nc1cc[nH+]cc1)/NC#N)c1cc([N+](=O)[O-])ccc1	IC50	=	0.031	uM	F	CELL-LINE	MCF7	383.432
O(CCCCCC\N=C(\Nc1cc[nH+]cc1)/NC#N)c1ccccc1[N+](=O)[O-]	IC50	=	0.0063	uM	F	CELL-LINE	MCF7	383.432
O(CCCCCC\N=C(\Nc1cc[nH+]cc1)/NC#N)c1ccc([N+](=O)[O-])cc1	IC50	=	0.12	uM	F	CELL-LINE	MCF7	383.432
O(C)c1c(OC)cc(cc1OC)Cc1nc2c(ncnc2N)n1CC1(CC1)C	IC50	=	112.202	uM	F	CELL-LINE	MCF7	383.452
O(C)c1c(OC)cc(cc1OC)Cc1nc2c(ncnc2N)n1C\C=C/CC	IC50	=	64.5654	uM	F	CELL-LINE	MCF7	383.452
O(C)c1c(OC)cc(cc1OC)Cc1nc2c(ncnc2N)n1CC1CCC1	IC50	=	45.7088	uM	F	CELL-LINE	MCF7	383.452
O(C)c1c(OC)cc(cc1OC)Cc1nc2c(ncnc2N)n1C\C=C\CC	IC50	=	46.7735	uM	F	CELL-LINE	MCF7	383.452
O(C)c1cc(OC)cc2N(CC[NH+](C)C)C(=O)C(=Cc12)c1ccc(OC)cc1	IC50	=	10	uM	F	CELL-LINE	MCF7	383.468
O1C[C@H]2[C@@H]([C@@H](c3c(C2)cc2OCOc2c3)c2cc(OC)c(O)c(OC)c2)C1=O	ED50	=	0.018	uM	F	CELL-LINE	MCF7	384.384
O1c2c3c(ccc2)cccc3OC12C=CC(=O)c1c2cccc1OC\C(=C\C)\C	IC50	=	4.3	uM	F	CELL-LINE	MCF7	384.431
O1c2c3c(ccc2)cccc3OC12C=CC(=O)c1c2cccc1OC\C=C(\C)/C	IC50	=	2	uM	F	CELL-LINE	MCF7	384.431
O1c2c3c(ccc2)cccc3OC12C=CC(=O)c1c2cccc1OC\C(=C/C)\C	IC50	=	1.9	uM	F	CELL-LINE	MCF7	384.431
Oc1ccc(cc1)CNc1nc(nc2n(cnc12)C(C)C)NC(C(C)C)CO	IC50	=	9.3	uM	F	CELL-LINE	MCF7	384.484
Oc1cc(ccc1)CNc1nc(nc2n(cnc12)C(C)C)NC(C(C)C)CO	IC50	=	14.8	uM	F	CELL-LINE	MCF7	384.484
Oc1ccccc1CNc1nc(nc2n(cnc12)C(C)C)NC(C(C)C)CO	IC50	=	5.7	uM	F	CELL-LINE	MCF7	384.484
O=C1c2c(C(=O)c3c1cccc3)c(nnc2NCC[NH+](C)C)NCC[NH+](C)C	IC50	=	0.00095	uM	F	CELL-LINE	MCF7	384.484
Clc1cc(ccc1)C=1Oc2c(C(=O)C=1)c(O)cc(O)c2C=1CC[NH+](CC=1)C	IC50	=	1	uM	F	CELL-LINE	MCF7	384.839
Clc1ccc(cc1)C=1Oc2c(C(=O)C=1)c(O)cc(O)c2C=1CC[NH+](CC=1)C	IC50	=	3	uM	F	CELL-LINE	MCF7	384.839
Clc1ccccc1C=1Oc2c(C(=O)C=1)c(O)cc(O)c2C=1CC[NH+](CC=1)C	IC50	=	0.75	uM	F	CELL-LINE	MCF7	384.839
Brc1c(F)c(N)c2c(OC(=CC2=O)c2cc(F)c(N)cc2)c1F	IC50	=	0.16	uM	F	CELL-LINE	MCF7	385.139
Fc1nc(N)c2nc(n(c2n1)CCC#C)Cc1cc(OC)c(OC)c(OC)c1	IC50	=	25.1189	uM	F	CELL-LINE	MCF7	385.399
O(C)c1c(OC)cc(cc1OC)Cc1nc2c(ncnc2N)n1CCCCC	IC50	=	61.6595	uM	F	CELL-LINE	MCF7	385.468
O(C)c1c(OC)cc(cc1OC)Cc1nc2c(ncnc2N)n1CC(CC)C	IC50	=	61.6595	uM	F	CELL-LINE	MCF7	385.468
Clc1c(F)c(S(=O)(=O)Nc2ccc(OC)cc2)c(F)c(Cl)c1F	GI50	=	0.037	uM	F	CELL-LINE	MCF7	386.177
O1c2c(cc(cc2O)\C=C\C(OC)=O)[C@@H](C(OC)=O)[C@@H]1c1cc(O)c(O)cc1	GI50	=	0.029	uM	F	CELL-LINE	MCF7	386.356
S1C2=C(C3(NC(=O)N(CCC[NH+](C)C)C3=O)C1)C(=O)c1c(cccc1)C2=O	IC50	=	0.019	uM	F	CELL-LINE	MCF7	386.452
Sc1nc2c(nc(nc2NCc2ccccc2)NC(CC)CO)n1C(C)C	IC50	=	55	uM	F	CELL-LINE	MCF7	386.524
S1c2cc(O)ccc2O[C@@H](CCC[NH+]2CCCCC2)[C@H]1c1ccc(O)cc1	IC50	=	0.0012	uM	F	CELL-LINE	MCF7	386.536
Clc1ccc(OCCCCCCC\N=C(\Nc2cc[nH+]cc2)/NC#N)cc1	IC50	=	0.056	uM	F	CELL-LINE	MCF7	386.907
Fc1nc(N)c2nc(n(c2n1)CCC=C)Cc1cc(OC)c(OC)c(OC)c1	IC50	=	33.1131	uM	F	CELL-LINE	MCF7	387.415
O(Cc1ccccc1)c1ccc(cc1)-c1cc2c(nc1O)cc(OC)cc2OC	IC50	=	10	uM	F	CELL-LINE	MCF7	387.435
O(NC(=O)CCCCCCN/C(=N\C#N)/Nc1cc[nH+]cc1)C1CCCCC1	IC50	=	0.94	uM	F	CELL-LINE	MCF7	387.508
O=C1c2c(nccc2)-c2nccc3c2c1nc1c3cc(NCc2ccccc2)cc1	IC50	=	0.04	uM	F	CELL-LINE	MCF7	388.43
O1CC[NH+](CC1)CCNC(=O)c1cc(NCc2cc(O)ccc2O)ccc1O	IC50	=	14	uM	F	CELL-LINE	MCF7	388.444
O=C(NC(c1ccccc1)c1ccccc1)C(NC(=O)N[O-])Cc1ccccc1	IC50	=	43.8	uM	F	CELL-LINE	MCF7	388.447
O(C)c1c(OC)cc(cc1OC)CCc1ccc(OCC[NH+](CC)CC)cc1	ED50	=	4.3	uM	F	CELL-LINE	MCF7	388.528
O(CC[NH+](C)C)c1ccc(cc1)\C(=C(/CC)\c1ccccc1)\c1ccc(O)cc1	EC50	=	1.6e-05	uM	F	CELL-LINE	MCF7	388.531
O(CC[NH+](C)C)c1ccc(cc1)\C(=C(\CC)/c1ccccc1)\c1ccc(O)cc1	EC50	=	3e-05	uM	F	CELL-LINE	MCF7	388.531
Clc1cc(Nc2nc(nc3n(cnc23)C(C)C)N[C@H](C(C)C)CO)ccc1	IC50	=	10.7	uM	F	CELL-LINE	MCF7	388.903
Clc1nc2c(nc(nc2NCc2ccccc2)NC(CC)CO)n1C(C)C	IC50	=	54	uM	F	CELL-LINE	MCF7	388.903
FC(F)(F)c1[nH+]ccc(Nc2ccccc2C(Oc2cc(OC)ccc2)=O)c1	GI50	=	7.6	uM	F	CELL-LINE	MCF7	389.353
O(CC(=O)[O-])c1ccc(cc1)/C(=C(/c1ccc(O)cc1)\c1ccc(O)cc1)/CC	IC50	=	2.39	uM	F	CELL-LINE	MCF7	389.427
Fc1nc(N)c2nc(n(c2n1)CCCC)Cc1cc(OC)c(OC)c(OC)c1	IC50	=	23.9883	uM	F	CELL-LINE	MCF7	389.431
O(C)c1ccc(cc1)C1=NC(=CC2C1C(=O)c1c(nccc1)C2=O)C(OCC)=O	IC50	=	1.5	uM	F	CELL-LINE	MCF7	390.395
O(C)c1ccc(cc1)C1=NC(=CC2C1C(=O)c1ncccc1C2=O)C(OCC)=O	IC50	=	0.9	uM	F	CELL-LINE	MCF7	390.395
O1CC2=C(C=C3N(Cc4c3nc3c(cccc3)c4CC)C2=O)C(O)(CC1=O)CC	IC50	=	0.021	uM	F	CELL-LINE	MCF7	390.439
O1[C@@H]2[C@@H](CC[C@@H]([C@H]3[C@@]2(C)C(=O)CC3[NH+]2CCCC2)C)C(C[NH+]2CCCC2)C1=O	GI50	=	4.2	uM	F	CELL-LINE	MCF7	390.568
Clc1ccc(cc1)Cn1cc(c2c1cccc2)C(=O)C(=O)Nc1cc[nH+]cc1	IC50	=	5.416	uM	F	CELL-LINE	MCF7	390.85
Fc1nc(N)c2nc(n(c2n1)CCOC)Cc1cc(OC)c(OC)c(OC)c1	IC50	=	64.5654	uM	F	CELL-LINE	MCF7	391.403
O=C(NC1CCCCC1)C(NC(=O)n1nnc2c1cccc2)Cc1ccccc1	IC50	=	20.7	uM	F	CELL-LINE	MCF7	391.475
O=C(NCC1CCCCC1)C(NC(=O)n1nnc2c1cccc2)c1ccccc1	IC50	=	35.6	uM	F	CELL-LINE	MCF7	391.475
O=C(N1CCC(CC1)CCCCNC(=O)\C=C\c1cccnc1)c1ccccc1	IC50	=	0.0074	uM	F	CELL-LINE	MCF7	391.515
Fc1c(COC(=O)CC)c(F)c2OC(=CC(=O)c2c1N)c1cc(F)c(N)cc1	IC50	=	0.13	uM	F	CELL-LINE	MCF7	392.333
O1CC2=C(C=C3N(Cc4c3nc3c(cc(O)cc3)c4CC)C2=O)[C@@](O)(CC)C1=O	IC50	=	0.37	uM	F	CELL-LINE	MCF7	392.411
Oc1ccc(NCc2cc(O)ccc2O)cc1C(=O)NCCCc1ccccc1	IC50	=	2	uM	F	CELL-LINE	MCF7	392.455
Oc1c2[nH]c3c(c2cc(C)c1-c1c(cc2c([nH]c4c2cccc4)c1O)C)cccc3	GI50	=	11.2	uM	F	CELL-LINE	MCF7	392.458
o1cc(cc1)[C@@H]1CC=C2[C@]3(C(CC[C@@]12C)[C@@]1(C(CC3=O)C(C)(C)C(=O)C=C1)C)C	GI50	=	3	uM	F	CELL-LINE	MCF7	392.539
O(CCOC)c1cc2c(ncnc2Nc2cc(ccc2)C#C)cc1OCCOC	IC50	=	0.22	uM	F	CELL-LINE	MCF7	393.443
s1nc(cc1[N-]C(=O)C(=O)c1c2c(n(c1)Cc1onc(c1)CC)cccc2)C	IC50	=	0.23	uM	F	CELL-LINE	MCF7	393.447
S1C2=C(n3cc(nc3C=C2)C(=O)NCC[NH+]2CCCC2)C(=O)c2c1cccc2	IC50	=	0.61	uM	F	CELL-LINE	MCF7	393.491
S(Oc1cc2CC[C@H]3[C@@H]4CCC(=O)[C@]4(CC[C@@H]3c2cc1OCC)C)(=O)(=O)N	GI50	=	4.84	uM	F	CELL-LINE	MCF7	393.504
Clc1ccccc1OC(=O)c1ccccc1Nc1cc([nH+]cc1)C(F)(F)F	GI50	=	0.28	uM	F	CELL-LINE	MCF7	393.772
Clc1ccc(OC(=O)c2ccccc2Nc2cc([nH+]cc2)C(F)(F)F)cc1	GI50	=	3.7	uM	F	CELL-LINE	MCF7	393.772
Clc1cc(OC(=O)c2ccccc2Nc2cc([nH+]cc2)C(F)(F)F)ccc1	GI50	=	4.8	uM	F	CELL-LINE	MCF7	393.772
Brc1cc2[nH]cc(c2cc1)-c1scc(n1)-c1c2c([nH]c1)cccc2	GI50	=	27.2	uM	F	CELL-LINE	MCF7	394.296
Brc1cc2[nH]cc(c2cc1)-c1nc(sc1)-c1c2c([nH]c1)cccc2	GI50	=	16.7	uM	F	CELL-LINE	MCF7	394.296
Fc1c(OCC[NH+](C)C)c(F)c2OC(=CC(=O)c2c1N)c1cc(F)c(N)cc1	IC50	=	1.4	uM	F	CELL-LINE	MCF7	394.373
Fc1cc2nc3C=4N(Cc3cc2cc1C)C(=O)C1=C(C=4)C(O)(CC(OC1)=O)CC	IC50	=	1e-05	uM	F	CELL-LINE	MCF7	394.402
Oc1ccc(NCc2cc(O)ccc2O)cc1C(=O)NCCc1ccc(O)cc1	IC50	=	16	uM	F	CELL-LINE	MCF7	394.427
S(=O)(=O)(Nc1cc(OC)c(Nc2c3c([nH+]c4c2cccc4)cccc3)cc1)C	IC50	=	0.075	uM	F	CELL-LINE	MCF7	394.475
o1cc(cc1)[C@@H]1CC=C2[C@]1(CCC1[C@@]2(C)[C@H](O)CC2[C@@]1(C=CC(=O)C2(C)C)C)C	GI50	=	5	uM	F	CELL-LINE	MCF7	394.555
Clc1ccc(cc1)C1=NC(=CC2C1C(=O)c1c(nccc1)C2=O)C(OCC)=O	IC50	=	0.3	uM	F	CELL-LINE	MCF7	394.814
Clc1ccc(cc1)C1=NC(=CC2C1C(=O)c1ncccc1C2=O)C(OCC)=O	IC50	=	0.5	uM	F	CELL-LINE	MCF7	394.814
o1cccc1Cn1cc(c2c1cccc2)C(=O)C(=O)Nc1cc2c(nccc2)cc1	IC50	=	0.497	uM	F	CELL-LINE	MCF7	395.418
s1c2c(-c3c(N(CCC[NH+](C)C)C2=O)cccc3)c2c1cc(cc2)C(OC)=O	IC50	=	0.59	uM	F	CELL-LINE	MCF7	395.503
S(Oc1cc2CC[C@H]3[C@@H]4CC[C@H](O)[C@]4(CC[C@@H]3c2cc1OCC)C)(=O)(=O)N	GI50	=	0.61	uM	F	CELL-LINE	MCF7	395.52
S(C)c1cc2[C@@H]3[C@H]([C@@H]4CCC(=O)[C@]4(CC3)C)CCc2cc1OS(=O)(=O)N	IC50	=	0.4	uM	F	CELL-LINE	MCF7	395.544
Ic1cc2[C@@H]3[C@H]([C@@H]4CCC(=O)[C@]4(CC3)C)CCc2cc1O	GI50	=	38	uM	F	CELL-LINE	MCF7	396.268
O1c2c3c(ccc2)cccc3OC12C=CC(=O)c1c2cccc1OCc1ccoc1	IC50	=	2	uM	F	CELL-LINE	MCF7	396.398
O1c2c3c(ccc2)cccc3OC12C=CC(=O)c1c2cccc1OCc1occc1	IC50	=	1.1	uM	F	CELL-LINE	MCF7	396.398
Fc1ccc(cc1)CCNC(=O)c1cc(NCc2cc(O)ccc2O)ccc1O	IC50	=	12	uM	F	CELL-LINE	MCF7	396.418
O(CC[NH+](CC)CC)c1ccc(cc1)\C(=C\CCCCCC)\c1ccc(O)cc1	IC50	=	2.8	uM	F	CELL-LINE	MCF7	396.595
O(CC[NH+](CC)CC)c1ccc(cc1)\C(=C/CCCCCC)\c1ccc(O)cc1	IC50	=	2.9	uM	F	CELL-LINE	MCF7	396.595
O(CC[NH+](CC)CC)c1ccc(cc1)\C(=C(/CCCC)\CC)\c1ccc(O)cc1	IC50	=	2.8	uM	F	CELL-LINE	MCF7	396.595
Clc1cc2c(nc3C=4N(Cc3c2)C(=O)C2=C(C=4)C(O)(CC(OC2)=O)CC)cc1	IC50	=	0.0013	uM	F	CELL-LINE	MCF7	396.83
FC(F)(F)C(=O)Nc1ccccc1-c1c2c(ncc1)C(=O)c1ncccc1C2=O	IC50	=	0.006	uM	F	CELL-LINE	MCF7	397.312
O(C)c1cc(OC)cc2N(CCC(OC)=O)C(=O)C(=Cc12)c1ccc(OC)cc1	IC50	=	10	uM	F	CELL-LINE	MCF7	397.427
O(C)c1cc(OC)cc2N(CC(OCC)=O)C(=O)C(=Cc12)c1ccc(OC)cc1	IC50	=	10	uM	F	CELL-LINE	MCF7	397.427
O(C(C)C)c1ccc(cc1)\C(=C(/C#N)\c1ccccc1)\c1ccc(OC(C)C)cc1	EC50	=	0.005	uM	F	CELL-LINE	MCF7	397.518
O(CC[NH+](CC)CC)c1ccc(cc1)/C(=C(/c1ccccc1)\c1ccccc1)/C#N	EC50	=	0.025	uM	F	CELL-LINE	MCF7	397.542
S(C)c1cc2[C@@H]3[C@H]([C@@H]4CC[C@H](O)[C@]4(CC3)C)CCc2cc1OS(=O)(=O)N	IC50	=	0.43	uM	F	CELL-LINE	MCF7	397.56
O1C[C@H]2[C@@H]([C@@H](c3c(C2)cc2OCOc2c3)c2cc(OC)c(OC)c(OC)c2)C1=O	ED50	=	0.011	uM	F	CELL-LINE	MCF7	398.411
O(C[NH+]1CCCC1)c1ccc(cc1)C\C(=C(\CC)/c1ccccc1)\c1ccccc1	IC50	=	142.19	uM	F	CELL-LINE	MCF7	398.57
O(C[NH+]1CCCC1)c1ccc(cc1)/C(=C(/Cc1ccccc1)\c1ccccc1)/CC	IC50	=	22.36	uM	F	CELL-LINE	MCF7	398.57
O(C[NH+]1CCCC1)c1ccc(cc1)/C(=C(/CC)\c1ccccc1)/Cc1ccccc1	IC50	=	10.34	uM	F	CELL-LINE	MCF7	398.57
O(C[NH+]1CCCC1)c1ccc(cc1)\C(=C(/Cc1ccccc1)\CC)\c1ccccc1	IC50	=	3.57	uM	F	CELL-LINE	MCF7	398.57
Fc1nc(N)c2nc(n(c2n1)CCCC#C)Cc1cc(OC)c(OC)c(OC)c1	IC50	=	10.9648	uM	F	CELL-LINE	MCF7	399.426
Fc1nc(N)c2nc(n(c2n1)CCC#CC)Cc1cc(OC)c(OC)c(OC)c1	IC50	=	37.1535	uM	F	CELL-LINE	MCF7	399.426
O(C)C1=CC=C2c3c(cc(OC)c(OC)c3OC)CC[C@H](NC(=O)C)C2=CC1=O	IC50	=	0.0153	uM	F	CELL-LINE	MCF7	399.443
O1CCCC1Cn1c2ncnc(N)c2nc1Cc1cc(OC)c(OC)c(OC)c1	IC50	=	91.2011	uM	F	CELL-LINE	MCF7	399.451
O=C(NCc1ccccc1)C(NC(=O)n1nnc2c1cccc2)Cc1ccccc1	IC50	=	24.7	uM	F	CELL-LINE	MCF7	399.454
s1nc(cc1[N-]C(=O)C(=O)c1c2c(n(c1)Cc1ccc(cc1)C#N)cccc2)C	IC50	=	0.619	uM	F	CELL-LINE	MCF7	399.454
OCC(Nc1nc(NCc2ccccc2)c2nc([N+](=O)[O-])n(c2n1)C(C)C)CC	IC50	=	117	uM	F	CELL-LINE	MCF7	399.455
O(C)c1c(OC)cc(cc1OC)Cc1nc2c(ncnc2N)n1CC(CC)CC	IC50	=	158.489	uM	F	CELL-LINE	MCF7	399.495
O(C)c1c(OC)cc(cc1OC)Cc1nc2c(ncnc2N)n1CCCC(C)C	IC50	=	69.1831	uM	F	CELL-LINE	MCF7	399.495
O1c2c3c(ccc2)cccc3OC12C1=C([C@@H](O)C3C(C4CC3C=C4)[C@H]1O)C(=O)C=C2	IC50	=	1.3	uM	F	CELL-LINE	MCF7	400.43
s1ccc(C(=O)c2cc(OC)c(OC)c(OC)c2)c1-c1cc(O)c(OC)cc1	IC50	=	0.3	uM	F	CELL-LINE	MCF7	400.451
O1c2c3c(ccc2)cccc3OC12C=CC(=O)c1c2cccc1OCCCCCC	IC50	=	13.4	uM	F	CELL-LINE	MCF7	400.474
S1C2=C(C3(NC(=O)N(CC[NH+](CC)CC)C3=O)C1)C(=O)c1c(cccc1)C2=O	IC50	=	0.021	uM	F	CELL-LINE	MCF7	400.479
O(C[NH+](CC)CC)c1ccc(cc1)/C(=C(/CC)\c1ccccc1)/Cc1ccccc1	IC50	=	19	uM	F	CELL-LINE	MCF7	400.586
O(C[NH+](CC)CC)c1ccc(cc1)C\C(=C(\CC)/c1ccccc1)\c1ccccc1	IC50	=	58.04	uM	F	CELL-LINE	MCF7	400.586
O(C[NH+](CC)CC)c1ccc(cc1)\C(=C(/Cc1ccccc1)\CC)\c1ccccc1	IC50	=	12.83	uM	F	CELL-LINE	MCF7	400.586
O(C[NH+](CC)CC)c1ccc(cc1)/C(=C(/Cc1ccccc1)\c1ccccc1)/CC	IC50	=	20.65	uM	F	CELL-LINE	MCF7	400.586
[Si](Oc1ccc(cc1)\C=C/c1cc(OC)c(OC)c(OC)c1)(C(C)(C)C)(C)C	ED50	=	7.29	uM	F	CELL-LINE	MCF7	400.59
Clc1ccc(OCCCCCCCC\N=C(\Nc2cc[nH+]cc2)/NC#N)cc1	IC50	=	0.054	uM	F	CELL-LINE	MCF7	400.934
Clc1cc(Nc2nc(nc3n(cnc23)C(C)C)NC2CCC([NH3+])CC2)ccc1	IC50	=	1.1	uM	F	CELL-LINE	MCF7	400.938
O1CC(=C(c2cc(OC)c(OC)c(OC)c2)C1=O)c1cc([N+](=O)[O-])c(OC)cc1	ED50	=	0.0419	uM	F	CELL-LINE	MCF7	401.371
Fc1nc(N)c2nc(n(c2n1)CC1CCC1)Cc1cc(OC)c(OC)c(OC)c1	IC50	=	40.738	uM	F	CELL-LINE	MCF7	401.442
Fc1nc(N)c2nc(n(c2n1)CCCC=C)Cc1cc(OC)c(OC)c(OC)c1	IC50	=	44.6684	uM	F	CELL-LINE	MCF7	401.442
O(C)c1c(OC)cc(cc1OC)Cc1nc2c(ncnc2N)n1CCOC(C)C	IC50	=	38.9045	uM	F	CELL-LINE	MCF7	401.467
S(=O)(=O)(\C=C\c1ccccc1)Cc1ccc(Nc2ncnc3c2cccc3)cc1	GI50	=	74	uM	F	CELL-LINE	MCF7	401.49
O(NC(=O)[C@@H](CCCCCN/C(=N\C#N)/Nc1cc[nH+]cc1)C)C1CCCCC1	IC50	=	0.0383	uM	F	CELL-LINE	MCF7	401.535
O(NC(=O)[C@H](CCCCCN/C(=N\C#N)/Nc1cc[nH+]cc1)C)C1CCCCC1	IC50	=	0.001	uM	F	CELL-LINE	MCF7	401.535
S1C[C@H](N=C1[C@@H]1C[C@@H]1C)\C=C/CC\C=C\C=C(\CCC1(OCCO1)CC=C)/C	GI50	=	0.03	uM	F	CELL-LINE	MCF7	401.615
s1ccc(C(O)c2cc(O)c(OC)cc2)c1-c1cc(OC)c(OC)c(OC)c1	IC50	=	0.5	uM	F	CELL-LINE	MCF7	402.467
O(CC[NH+](CC)CC)c1ccc(cc1)\C(=C/Cc1ccccc1)\c1ccc(O)cc1	IC50	=	3.2	uM	F	CELL-LINE	MCF7	402.558
O(CC[NH+](CC)CC)c1ccc(cc1)\C(=C\Cc1ccccc1)\c1ccc(O)cc1	IC50	=	2.9	uM	F	CELL-LINE	MCF7	402.558
Clc1ccccc1C=1Oc2c(C(=O)C=1)c(O)cc(O)c2[C@H]1CC[NH+](C[C@H]1O)C	IC50	=	0.5	uM	F	CELL-LINE	MCF7	402.854
Brc1ccc(cc1)-c1ccc(cc1)C(=O)CCCCCCC(=O)N[O-]	IC50	=	3	uM	F	CELL-LINE	MCF7	403.296
O=C1C2C(C=C(N=C2c2ccc(N(C)C)cc2)C(OCC)=O)C(=O)c2ncccc12	IC50	=	1	uM	F	CELL-LINE	MCF7	403.438
O=C1C2C(C(=NC(=C2)C(OCC)=O)c2ccc(N(C)C)cc2)C(=O)c2ncccc12	IC50	=	1.6	uM	F	CELL-LINE	MCF7	403.438
O(C)c1c(OC)cc(cc1OC)Cc1nc2c(ncnc2N)n1CC(OC)OC	IC50	=	72.4436	uM	F	CELL-LINE	MCF7	403.439
Fc1nc(N)c2nc(n(c2n1)C[C@H](CC)C)Cc1cc(OC)c(OC)c(OC)c1	IC50	=	43.6516	uM	F	CELL-LINE	MCF7	403.458
Fc1nc(N)c2nc(n(c2n1)CCCCC)Cc1cc(OC)c(OC)c(OC)c1	IC50	=	36.3078	uM	F	CELL-LINE	MCF7	403.458
S(=O)(=O)(N1C[C@@H](NC1=O)c1ccccc1)c1cc(C)c(NC(OCC)=O)cc1	GI50	=	0.15	uM	F	CELL-LINE	MCF7	403.459
S1C[C@H](N=C1[C@@H]1C[C@@H]1C)\C=C/CC\C=C\C=C(\CC[C@@H](OCOC)CC=C)/C	GI50	=	0.22	uM	F	CELL-LINE	MCF7	403.631
O(C)c1c(OC)cc(N2C(C(O)C2=O)c2cc([N+](=O)[O-])c(OC)cc2)cc1OC	IC50	=	0.03709	uM	F	CELL-LINE	MCF7	404.375
Oc1ccc(NCc2cc(O)ccc2O)cc1C(=O)NC1CCc2c(C1)cccc2	IC50	=	10	uM	F	CELL-LINE	MCF7	404.466
Clc1nc2c(nc(nc2NCc2cc(O)ccc2)NC(CC)CO)n1C(C)C	IC50	=	27	uM	F	CELL-LINE	MCF7	404.902
O=C1C2C(C=C(N=C2c2ccc([N+](=O)[O-])cc2)C(OCC)=O)C(=O)c2ncccc12	IC50	=	0.08	uM	F	CELL-LINE	MCF7	405.366
O=C1C2C(C(=NC(=C2)C(OCC)=O)c2ccc([N+](=O)[O-])cc2)C(=O)c2ncccc12	IC50	=	0.2	uM	F	CELL-LINE	MCF7	405.366
Clc1c(OC)c(OC)c(OC)cc1Cc1nc2c(ncnc2N)n1CCCC	IC50	=	19.0546	uM	F	CELL-LINE	MCF7	405.886
O1CC2=C(C=C3N(Cc4c3nc3c(c4)cc4OCOc4c3)C2=O)C(O)(CC1=O)CC	IC50	=	0.00055	uM	F	CELL-LINE	MCF7	406.394
O(C)c1cc(OC)cc2N(CCc3n[n-]nn3)C(=O)C(=Cc12)c1ccc(OC)cc1	IC50	=	10	uM	F	CELL-LINE	MCF7	406.422
[NH3+]C1CCC(Nc2nc(NCc3ccccc3)c3ncn(c3n2)C2CCCC2)CC1	IC50	=	1.4	uM	F	CELL-LINE	MCF7	406.558
O1c2c3c(ccc2)cccc3OC12C=CC(=O)c1c2cccc1OCc1cccnc1	IC50	=	1.5	uM	F	CELL-LINE	MCF7	407.425
O1c2c3c(ccc2)cccc3OC12C=CC(=O)c1c2cccc1OCc1ncccc1	IC50	=	2	uM	F	CELL-LINE	MCF7	407.425
O1c2c3c(ccc2)cccc3OC12C=CC(=O)c1c2cccc1OCc1ccncc1	IC50	=	8	uM	F	CELL-LINE	MCF7	407.425
s1nc(cc1[N-]C(=O)C(=O)c1c2c(n(c1)Cc1onc(c1)C(C)C)cccc2)C	IC50	=	2.131	uM	F	CELL-LINE	MCF7	407.474
S(=O)(=O)(Nc1ccc(cc1)C)c1ccc(cc1)\C=C\C(=O)Nc1ccccc1N	IC50	=	11.5	uM	F	CELL-LINE	MCF7	407.494
S(=O)(=O)(Nc1ccc(cc1)\C=C\C(=O)Nc1ccccc1N)c1ccc(cc1)C	IC50	=	6	uM	F	CELL-LINE	MCF7	407.494
O(C)c1ccc(cc1)CCNC(=O)c1cc(NCc2cc(O)ccc2O)ccc1O	IC50	=	14	uM	F	CELL-LINE	MCF7	408.454
O(C)c1cc2c(cc1OC)c1[n+](cc3cc(OC)c(OC)cc3c1cc2OCC)C	IC50	=	2	uM	F	CELL-LINE	MCF7	408.474
O=C(CCCCCCC(=O)N[O-])c1ccc(N2CCN(CC2)c2ccccc2)cc1	IC50	=	2	uM	F	CELL-LINE	MCF7	408.522
S(=O)(=O)(C(C[NH+](CC(S(=O)(=O)C)=C)C1CC(CCC1O)C(C)(C)C)=C)C	ED50	=	0.33	uM	F	CELL-LINE	MCF7	408.604
O(CC[NH+](C(C)C)C(C)C)c1ccc(cc1)\C(=C\1/CCCCC/1)\c1ccc(O)cc1	IC50	=	3.8	uM	F	CELL-LINE	MCF7	408.606
O(C(=O)C)c1cc(OC(=O)C)cc2N(C)C(=O)C(=Cc12)c1ccc(OC(=O)C)cc1	IC50	=	10	uM	F	CELL-LINE	MCF7	409.394
S1C2=C(n3cc(nc3C=C2)C(=O)NCC[NH+]2CCOCC2)C(=O)c2c1cccc2	IC50	=	7.08	uM	F	CELL-LINE	MCF7	409.49
S(CC)c1cc2[C@@H]3[C@H]([C@@H]4CCC(=O)[C@]4(CC3)C)CCc2cc1OS(=O)(=O)N	GI50	=	35.2	uM	F	CELL-LINE	MCF7	409.571
Brc1cc(Br)c2OC(=CC(=O)c2c1N)c1ccc(N)cc1	IC50	=	6.3	uM	F	CELL-LINE	MCF7	410.065
Fc1cc2nc3C=4N(Cc3cc2cc1OC)C(=O)C1=C(C=4)C(O)(CC(OC1)=O)CC	IC50	=	0.0022	uM	F	CELL-LINE	MCF7	410.401
o1nc(cc1Cn1cc(c2c1cccc2)C(=O)C(=O)Nc1cc2c(nccc2)cc1)C	IC50	=	0.095	uM	F	CELL-LINE	MCF7	410.433
Clc1ccc(NC(OCC#C)=O)cc1-c1sc2c(n1)cc(cc2)C(F)(F)F	IC50	=	40	uM	F	CELL-LINE	MCF7	410.803
s1cc(cc1)Cn1cc(c2c1cccc2)C(=O)C(=O)Nc1cc2c(nccc2)cc1	IC50	=	0.438	uM	F	CELL-LINE	MCF7	411.485
s1cccc1Cn1cc(c2c1cccc2)C(=O)C(=O)Nc1cc2c(nccc2)cc1	IC50	=	0.961	uM	F	CELL-LINE	MCF7	411.485
O(C)c1c(OC)cc(cc1OC)Cc1nc2c(ncnc2N)n1CC1CCCCC1	IC50	=	39.8107	uM	F	CELL-LINE	MCF7	411.506
S(CC)c1cc2[C@@H]3[C@H]([C@@H]4CC[C@H](O)[C@]4(CC3)C)CCc2cc1OS(=O)(=O)N	IC50	=	35.3	uM	F	CELL-LINE	MCF7	411.587
s1cc(nc1)Cn1cc(c2c1cccc2)C(=O)C(=O)Nc1cc2c(nccc2)cc1	IC50	=	0.486	uM	F	CELL-LINE	MCF7	412.473
O(CCC)c1nc2c(nc(nc2NCc2ccccc2)NC(CC)CO)n1C(C)C	IC50	=	50	uM	F	CELL-LINE	MCF7	412.538
O(C[NH+]1CCCCC1)c1ccc(cc1)/C(=C(/Cc1ccccc1)\c1ccccc1)/CC	IC50	=	19.05	uM	F	CELL-LINE	MCF7	412.597
O(C[NH+]1CCCCC1)c1ccc(cc1)C\C(=C(\CC)/c1ccccc1)\c1ccccc1	IC50	=	68.76	uM	F	CELL-LINE	MCF7	412.597
O(C[NH+]1CCCCC1)c1ccc(cc1)/C(=C(/CC)\c1ccccc1)/Cc1ccccc1	IC50	=	76.58	uM	F	CELL-LINE	MCF7	412.597
O(C[NH+]1CCCCC1)c1ccc(cc1)\C(=C(/Cc1ccccc1)\CC)\c1ccccc1	IC50	=	4.62	uM	F	CELL-LINE	MCF7	412.597
Clc1ccc(cc1)CCNC(=O)c1cc(NCc2cc(O)ccc2O)ccc1O	IC50	=	13	uM	F	CELL-LINE	MCF7	412.873
FC(F)(F)C(=O)Nc1ccccc1-c1c2c(ncc1)C(=O)c1nc(O)ccc1C2=O	IC50	=	0.03	uM	F	CELL-LINE	MCF7	413.311
FC(F)(F)C(=O)Nc1ccccc1-c1c2c(ncc1)C(=O)c1[nH+]ccc(N)c1C2=O	IC50	=	0.8	uM	F	CELL-LINE	MCF7	413.335
O(CC[NH+](CC)CC)c1ccc(cc1)\C(=C(/C#N)\c1ccccc1)\c1ccc(O)cc1	EC50	=	3e-05	uM	F	CELL-LINE	MCF7	413.541
O(CC[NH+](CC)CC)c1ccc(cc1)\C(=C(\C#N)/c1ccccc1)\c1ccc(O)cc1	EC50	=	2e-05	uM	F	CELL-LINE	MCF7	413.541
Brc1c(F)c(F)c(F)c(F)c1S(=O)(=O)Nc1ccc(OC)cc1	GI50	=	0.039	uM	F	CELL-LINE	MCF7	414.173
Brc1c(F)c(F)c(F)c(S(=O)(=O)Nc2ccc(OC)cc2)c1F	GI50	=	0.27	uM	F	CELL-LINE	MCF7	414.173
Brc1c(F)c(F)c(S(=O)(=O)Nc2ccc(OC)cc2)c(F)c1F	GI50	=	36	uM	F	CELL-LINE	MCF7	414.173
O1C[C@H]2[C@@H]([C@@H](c3c(cc4OCOc4c3)[C@@H]2O)c2cc(OC)c(OC)c(OC)c2)C1=O	GI50	=	0.6	uM	F	CELL-LINE	MCF7	414.41
Oc1c2c(C(=O)C=C(C(OC(=O)CCCCC(C)C)C\C=C(\C)/C)C2=O)c(O)cc1	IC50	=	250	uM	F	CELL-LINE	MCF7	414.498
S1C2=C(C3(NC(=O)N(CCC[NH+](CC)CC)C3=O)C1)C(=O)c1c(cccc1)C2=O	IC50	=	0.026	uM	F	CELL-LINE	MCF7	414.506
O(CC[NH+]1CCCCC1)c1cc2c(nc-3c(Cn4c-3cc3cc(O)ccc34)c2C)cc1	IC50	=	0.55	uM	F	CELL-LINE	MCF7	414.529
O1CC[NH+](CC1)COc1ccc(cc1)\C(=C(/Cc1ccccc1)\CC)\c1ccccc1	IC50	=	45.52	uM	F	CELL-LINE	MCF7	414.569
O1CC[NH+](CC1)COc1ccc(cc1)/C(=C(/Cc1ccccc1)\c1ccccc1)/CC	IC50	=	51.11	uM	F	CELL-LINE	MCF7	414.569
O1CC[NH+](CC1)COc1ccc(cc1)/C(=C(/CC)\c1ccccc1)/Cc1ccccc1	IC50	=	2.53	uM	F	CELL-LINE	MCF7	414.569
O1CC[NH+](CC1)COc1ccc(cc1)C\C(=C(\CC)/c1ccccc1)\c1ccccc1	IC50	=	16.59	uM	F	CELL-LINE	MCF7	414.569
O(CC[NH+]1CCCC1)c1ccc(cc1)[C@@H]1c2c(cc(O)cc2)CC[C@@H]1c1ccccc1	EC50	=	2e-05	uM	F	CELL-LINE	MCF7	414.569
Clc1cc2nc3C=4N(Cc3cc2cc1F)C(=O)C1=C(C=4)C(O)(CC(OC1)=O)CC	IC50	=	0.0017	uM	F	CELL-LINE	MCF7	414.82
Clc1cc(Nc2nc(nc3n(C(C)C)c(nc23)C)NC2CCC([NH3+])CC2)ccc1	IC50	=	8	uM	F	CELL-LINE	MCF7	414.965
O(C)c1cc(OC)cc2N(C)\C(=N/Nc3ccccc3)\C(=Cc12)c1ccc(OC)cc1	IC50	=	10	uM	F	CELL-LINE	MCF7	415.493
S(C)C1=CC=C2c3c(cc(OC)c(OC)c3OC)CC[C@H](NC(=O)C)C2=CC1=O	IC50	=	0.4	uM	F	CELL-LINE	MCF7	415.51
Brc1cc(Br)cc2c1NC(CC2=O)c1ccc(Cl)cc1	GI50	=	0.146	uM	F	CELL-LINE	MCF7	415.512
O(CC[NH+]1CCCC1)c1ccc(cc1)C1N(CCc2c1ccc(O)c2)c1ccccc1	IC50	=	0.029	uM	F	CELL-LINE	MCF7	415.557
O(C(=O)C)C1C(N(C1=O)c1cc(OC)c(OC)c(OC)c1)c1cc(N)c(OC)cc1	IC50	=	0.07046	uM	F	CELL-LINE	MCF7	416.43
O(C)c1cc(OC)cc2N(C)\C(=N/Nc3ncccc3)\C(=Cc12)c1ccc(OC)cc1	IC50	=	10	uM	F	CELL-LINE	MCF7	416.481
O=C1c2c(C(=O)c3c1cccc3)c(nnc2NCC[NH2+]CCO)NCC[NH2+]CCO	IC50	=	0.72	uM	F	CELL-LINE	MCF7	416.482
O[C@H]1C[C@H](O)C\C(=C\C=C/2\[C@@H]3CC[C@H]([C@@H](CCCC(O)(C)C)C)[C@]3(CCC\2)C)\C1=C	ED50	=	0.061	uM	F	CELL-LINE	MCF7	416.646
Fc1nc(N)c2nc(n(c2n1)CC1OCCC1)Cc1cc(OC)c(OC)c(OC)c1	IC50	=	22.9087	uM	F	CELL-LINE	MCF7	417.441
S(=O)(=O)(\C=C\c1ccc(O)cc1)Cc1ccc(Nc2ncnc3c2cccc3)cc1	GI50	=	100	uM	F	CELL-LINE	MCF7	417.489
S1c2cc(O)ccc2O[C@H]([C@H]1c1ccc(O)cc1)c1ccc(cc1)C=1CC[NH2+]CC=1	IC50	=	0.0009	uM	F	CELL-LINE	MCF7	418.537
O1[C@@H]2[C@@H](CC[C@@H]([C@H]3[C@@]2(C)C(=O)CC3[NH+]2CCCCC2)C)C(C[NH+]2CCCCC2)C1=O	GI50	=	4.7	uM	F	CELL-LINE	MCF7	418.622
Clc1cc(Cl)ccc1C=1Oc2c(C(=O)C=1)c(O)cc(O)c2C=1CC[NH+](CC=1)C	IC50	=	1.5	uM	F	CELL-LINE	MCF7	419.284
Fc1nc(N)c2nc(n(c2n1)CCOC(C)C)Cc1cc(OC)c(OC)c(OC)c1	IC50	=	15.8489	uM	F	CELL-LINE	MCF7	419.457
O(C)c1c(OC)cc(cc1OC)-c1c2c([nH]c1-c1ccc(OC)cc1)cc(OC)cc2	IC50	=	0.46	uM	F	CELL-LINE	MCF7	419.477
S(=O)(=O)(\C=C\c1ccc(F)cc1)Cc1ccc(Nc2ncnc3c2cccc3)cc1	GI50	=	16	uM	F	CELL-LINE	MCF7	419.48
Fc1c(COCCCCCC)c(F)c2OC(=CC(=O)c2c1N)c1cc(F)c(N)cc1	IC50	=	7.1	uM	F	CELL-LINE	MCF7	420.431
O1c2c3c(ccc2)cccc3OC12C=CC(=O)c1c2cccc1OCCc1ccccc1	IC50	=	3.9	uM	F	CELL-LINE	MCF7	420.464
S(Oc1cc2CC[C@H]3[C@@H]4CCC(=O)[C@]4(CC[C@@H]3c2cc1OC)C)(=O)([O-])=NC(=O)C	GI50	=	168	uM	F	CELL-LINE	MCF7	420.506
S1c2cc(O)ccc2O[C@H]([C@H]1c1ccc(O)cc1)c1ccc(cc1)C1CC[NH2+]CC1	IC50	=	0.0019	uM	F	CELL-LINE	MCF7	420.553
[NH3+]C1CCC(Nc2nc(N[C@@H](C)c3ccccc3)c3ncn(c3n2)C2CCCC2)CC1	IC50	=	3.3	uM	F	CELL-LINE	MCF7	420.585
S1c2cc(O)ccc2O[C@H]([C@H]1c1ccc(O)cc1)c1ccc(N2CC[NH2+]CC2)cc1	IC50	=	0.0028	uM	F	CELL-LINE	MCF7	421.541
Fc1c(COC(=O)C[NH+](C)C)c(F)c2OC(=CC(=O)c2c1N)c1cc(F)c(N)cc1	IC50	=	0.026	uM	F	CELL-LINE	MCF7	422.383
O1CC2=C(C=C3N(Cc4c3nc3c(c4)c(C[NH+](C)C)c(O)cc3)C2=O)[C@@](O)(CC)C1=O	IC50	=	0.42	uM	F	CELL-LINE	MCF7	422.461
O(CC[NH+]1CCCC1)c1ccc(cc1)/C(=C(/CC)\c1ccccc1)/c1ccc(cc1)C#C	IC50	=	14.7	uM	F	CELL-LINE	MCF7	422.592
ClCCN(CCCl)c1cc2c3c4c(nc2cc1)C(=O)c1c(nccc1)-c4ncc3	IC50	=	0.3	uM	F	CELL-LINE	MCF7	423.303
Clc1cc(Nc2nc(nc3n(C(C)C)c(Cl)nc23)NC(C(C)C)CO)ccc1	IC50	=	45	uM	F	CELL-LINE	MCF7	423.348
O=C(N[C@@H](CCC(=O)[O-])C(=O)[O-])c1ccc(cc1)CCc1c2c([nH]c1)nc(nc2C)N	GI50	=	0.169	uM	F	CELL-LINE	MCF7	423.429
S(=O)(=O)(Nc1ccc(cc1)\C=C\C(=O)Nc1ccccc1N)c1ccc(OC)cc1	IC50	=	8	uM	F	CELL-LINE	MCF7	423.493
Ic1cc(ccc1Oc1ccccc1)\C=C(/C#N)\c1ncccc1	IC50	=	20	uM	F	CELL-LINE	MCF7	424.241
S(=O)(=O)(NCCOC)c1ccc(Nc2nc(ccn2)-c2n3c(nc2)C=CC=C3)cc1	IC50	=	0.39	uM	F	CELL-LINE	MCF7	424.485
O(C)c1cc(OC)cc2N(CC(=O)N(CC)CC)C(=O)C(=Cc12)c1ccc(OC)cc1	IC50	=	10	uM	F	CELL-LINE	MCF7	424.497
O1CC1CNc1c2c(C(=O)c3c(cccc3)C2=O)c(NCC(O)C[NH+](CC)CC)cc1	IC50	=	0.04	uM	F	CELL-LINE	MCF7	424.521
Oc1cc2CC(n3c(-c2cc1)c(c1c3cc(O)cc1)\C=N\Cc1ccccc1)CCCC	IC50	=	0.26	uM	F	CELL-LINE	MCF7	424.544
O(CC[NH+](CC)CC)c1ccc(cc1)\C(=C/CCCCCCCC)\c1ccc(O)cc1	IC50	=	5.1	uM	F	CELL-LINE	MCF7	424.649
O(CC[NH+](CC)CC)c1ccc(cc1)\C(=C\CCCCCCCC)\c1ccc(O)cc1	IC50	=	3.6	uM	F	CELL-LINE	MCF7	424.649
O=C(N1CC[NH+](CC1)C)CCC(=O)Nc1c2c(c3c(c1)c1c(cc3)cccc1)cccc2	IC50	=	40	uM	F	CELL-LINE	MCF7	426.54
FC(F)(F)C(=O)Nc1ccccc1-c1c2c(ncc1)C(=O)c1nccc(OC)c1C2=O	IC50	=	0.0003	uM	F	CELL-LINE	MCF7	427.338
OCC(Nc1nc(NCc2ccccc2)c2nc(n(c2n1)C(C)C)NCCCO)CC	IC50	=	40	uM	F	CELL-LINE	MCF7	427.553
Clc1cc(Cl)ccc1OC(=O)c1ccccc1Nc1cc([nH+]cc1)C(F)(F)F	GI50	=	3.6	uM	F	CELL-LINE	MCF7	428.217
Brc1cc2[C@@H]3[C@H]([C@@H]4CCC(=O)[C@]4(CC3)C)CCc2cc1OS(=O)(=O)N	GI50	=	16.95	uM	F	CELL-LINE	MCF7	428.347
O(CC[NH+]1CCCCC1)c1cc2c(nc-3c(Cn4c-3cc3cc(O)ccc34)c2CC)cc1	IC50	=	6.3	uM	F	CELL-LINE	MCF7	428.556
O(CC[NH+]1CCCCC1)c1cc2c(nc-3c(Cn4c-3cc3cc(OC)ccc34)c2C)cc1	IC50	=	5.3	uM	F	CELL-LINE	MCF7	428.556
s1cccc1C(O)CC\C(=C\C=C\CC\C=C/c1cc(OC)c(OC)c(OC)c1)\C	GI50	=	0.28	uM	F	CELL-LINE	MCF7	428.593
s1cccc1C(O)CC\C(=C\C=C\CC\C=C\c1cc(OC)c(OC)c(OC)c1)\C	GI50	=	15	uM	F	CELL-LINE	MCF7	428.593
Brc1ccccc1C=1Oc2c(C(=O)C=1)c(O)cc(O)c2C=1CC[NH+](CC=1)C	IC50	=	1	uM	F	CELL-LINE	MCF7	429.29
O=C1NC(=NC(N)=C1CCCCc1ccc(cc1)C(=O)N[C@@H](CCC(=O)[O-])C(=O)[O-])N	IC50	=	0.061	uM	F	CELL-LINE	MCF7	429.433
Oc1ccc(cc1C[NH+](C)C)\C(=C(/C#N)\c1ccccc1)\c1cc(C[NH+](C)C)c(O)cc1	EC50	=	0.044	uM	F	CELL-LINE	MCF7	429.564
O(CC[NH+]1CCCCC1)c1ccc(cc1)C1N(CCc2c1ccc(O)c2)c1ccccc1	IC50	=	0.032	uM	F	CELL-LINE	MCF7	429.584
Oc1nc(nc(N)c1CCCNc1ccc(cc1)C(=O)N[C@@H](CCC(=O)[O-])C(=O)[O-])N	ED50	=	0.037	uM	F	CELL-LINE	MCF7	430.421
O1C[C@H]2N([C@@H](c3[nH]c4c(c3C2)cc2c(c4)cccc2)c2cc(OC)c(O)c(OC)c2)C1=O	GI50	=	5	uM	F	CELL-LINE	MCF7	430.46
O1C[C@H]2N([C@@H](c3[nH]c4c(c3C2)c2c(cc4)cccc2)c2cc(OC)c(O)c(OC)c2)C1=O	GI50	=	2	uM	F	CELL-LINE	MCF7	430.46
s1c2c(cc1-c1n(c3c(cccc3)c1C1=CC(=O)NC1=O)CCC[NH+](C)C)cccc2	GI50	=	0.1	uM	F	CELL-LINE	MCF7	430.552
O1c2c(CC[C@]1(CCC[C@@H](CCC[C@@H](CCCC(C)C)C)C)C)c(C)c(O)c(C)c2C	IC50	=	329	uM	F	CELL-LINE	MCF7	430.717
Clc1ncnc2n(cnc12)C(P(OC)(OC)=O)\C=C\1/OC(=O)C(OC)=C/1OC	IC50	=	90.11	uM	F	CELL-LINE	MCF7	430.741
Ic1cc(ccc1NS(=O)(=O)[O-])-c1sc2c(n1)cccc2	IC50	=	1.8	uM	F	CELL-LINE	MCF7	431.254
O(CCCc1c(nc(nc1O)N)N)c1ccc(cc1)C(=O)NC(CCC(=O)[O-])C(=O)[O-]	IC50	=	0.085	uM	F	CELL-LINE	MCF7	431.405
O(C(=O)C)C1[C@@H](N(C1=O)c1c2c(c3c(c1)c1c(cc3)cccc1)cccc2)c1ccccc1	IC50	=	9.81	uM	F	CELL-LINE	MCF7	431.491
S(C)C1=CC=C2c3c(cc(OC)c(OC)c3OC)CC[C@H](NC(=O)C[NH3+])C2=CC1=O	IC50	=	10	uM	F	CELL-LINE	MCF7	431.533
Clc1c2c(ncc1)C(=O)c1nccc(c1C2=O)-c1ccccc1NC(=O)C(F)(F)F	IC50	=	0.06	uM	F	CELL-LINE	MCF7	431.757
O1c2c(OC1)cc1c(c2)[C@H]([C@@H](C(OC)=O)[C@H](CO)[C@H]1O)c1cc(OC)c(O)c(OC)c1	GI50	=	0.1	uM	F	CELL-LINE	MCF7	432.425
O1\C(=C/CN2C=CC(=O)NC2=O)\C(OCc2ccccc2)=C(OCc2ccccc2)C1=O	IC50	=	20	uM	F	CELL-LINE	MCF7	432.432
O1c2c3c(ccc2)cccc3OC12C=CC(=O)c1c2cccc1OC\C=C\c1ccccc1	IC50	=	7.9	uM	F	CELL-LINE	MCF7	432.475
O(C(=O)C)C1[C@@H](N(C1=O)c1c2c(c3c(c1)c1c(cc3)cccc1)cccc2)c1ncccc1	IC50	=	14.93	uM	F	CELL-LINE	MCF7	432.479
Brc1nc2c(nc(nc2NCc2ccccc2)NC(CC)CO)n1C(C)C	IC50	=	53	uM	F	CELL-LINE	MCF7	433.354
Fc1c(CNC(=O)CCCCC)c(F)c2OC(=CC(=O)c2c1N)c1cc(F)c(N)cc1	IC50	=	0.34	uM	F	CELL-LINE	MCF7	433.43
S(C(=O)[C@@H]1C[C@@H]1C)C[C@H](NC(=O)C)\C=C/CC\C=C\C=C(\CC[C@@H](OC)CC=C)/C	GI50	=	4.2	uM	F	CELL-LINE	MCF7	433.657
Clc1c(OC)c(OC)c(OC)cc1Cc1nc2c(nc(F)nc2N)n1CCCC#C	IC50	=	1.99526	uM	F	CELL-LINE	MCF7	433.871
Fc1c(COC(=O)CCCCC)c(F)c2OC(=CC(=O)c2c1N)c1cc(F)c(N)cc1	IC50	=	0.16	uM	F	CELL-LINE	MCF7	434.414
o1c2c(ccc(OC)c2)c(Cc2cc(OC)c(OC)c(OC)c2)c1-c1ccc(OC)cc1	IC50	=	0.4	uM	F	CELL-LINE	MCF7	434.488
s1c-2c(c3c1cc(O)cc3)C(Oc1cc(O)ccc1-2)c1ccc(OCC[NH+](C)C)cc1	IC50	=	0.002	uM	F	CELL-LINE	MCF7	434.536
s1cccc1C(O)CCC(CCCCCCCc1cc(OC)c(OC)c(OC)c1)C	GI50	=	43	uM	F	CELL-LINE	MCF7	434.641
FC(F)(F)C(=O)N1CCc2c(ccc(O)c2)C1c1ccc(OCC[NH+]2CCCC2)cc1	IC50	=	0.0866	uM	F	CELL-LINE	MCF7	435.466
O(C)c1c(OC)cc(cc1OC)-c1c2c([nH]c1-c1cc(O)c(OC)cc1)cc(OC)cc2	IC50	=	0.37	uM	F	CELL-LINE	MCF7	435.476
O1C(C[NH+](C\C=C/C[NH3+])C)C(OC(=O)C)C(OC(=O)C)C1n1c2ncnc(N)c2nc1	IC50	=	51	uM	F	CELL-LINE	MCF7	435.485
S1c2cc(O)ccc2O[C@H]([C@H]1c1ccc(O)cc1)c1ccc(N2CCC[NH2+]CC2)cc1	IC50	=	0.028	uM	F	CELL-LINE	MCF7	435.568
S1c2cc(O)ccc2O[C@H]([C@H]1c1ccc(O)cc1)c1ccc(N2CC[NH+](CC2)C)cc1	IC50	=	0.0034	uM	F	CELL-LINE	MCF7	435.568
Clc1ccc(cc1)\C=C\S(=O)(=O)Cc1ccc(Nc2ncnc3c2cccc3)cc1	GI50	=	52	uM	F	CELL-LINE	MCF7	435.935
Fc1c(COC(=O)CC[NH+](C)C)c(F)c2OC(=CC(=O)c2c1N)c1cc(F)c(N)cc1	IC50	=	0.019	uM	F	CELL-LINE	MCF7	436.41
s1c(ccc1NCCCc1c(nc(nc1O)N)N)C(=O)N[C@@H](CCC(=O)[O-])C(=O)[O-]	IC50	=	38	uM	F	CELL-LINE	MCF7	436.449
O1c2c3c(ccc2)cccc3OC12C=CC(=O)c1c2cccc1OCc1ccc(OC)cc1	IC50	=	0.7	uM	F	CELL-LINE	MCF7	436.463
O1c2c3c(ccc2)cccc3OC12C=CC(=O)c1c2cccc1OCc1cc(OC)ccc1	IC50	=	2.3	uM	F	CELL-LINE	MCF7	436.463
o1cc(cc1)[C@@H]1CC=C2[C@]1(CCC1[C@@]2(C)[C@H](OC(=O)C)CC2[C@@]1(C=CC(=O)C2(C)C)C)C	GI50	=	0.06	uM	F	CELL-LINE	MCF7	436.592
O1c2c(CCC1(COCCCCC)C)c(C)c(OC(=O)[C@@H]([NH3+])CCCC[NH3+])c(C)c2C	IC50	=	22	uM	F	CELL-LINE	MCF7	436.637
s1c(ncc1NCCCc1c(nc(nc1O)N)N)C(=O)N[C@@H](CCC(=O)[O-])C(=O)[O-]	IC50	=	4	uM	F	CELL-LINE	MCF7	437.437
s1c(-c2[nH]nc-3c2C(=O)c2c-3cccc2NC(=O)[N-]N2CC[NH+](CC2)C)c(nc1C)C	IC50	=	0.023	uM	F	CELL-LINE	MCF7	437.528
S(=O)(=O)(NOCC1CCCCC1)CCCCCCN/C(=N\C#N)/Nc1cc[nH+]cc1	IC50	=	0.0034	uM	F	CELL-LINE	MCF7	437.589
S(=O)(=O)(NCCCOC)c1ccc(Nc2nc(ccn2)-c2n3c(nc2)C=CC=C3)cc1	IC50	=	0.6	uM	F	CELL-LINE	MCF7	438.512
O(C)c1cc(OC)cc2N(CCC(=O)N(CC)CC)C(=O)C(=Cc12)c1ccc(OC)cc1	IC50	=	10	uM	F	CELL-LINE	MCF7	438.524
S(=O)(=O)(NCC[NH+](C)C)c1ccc(Nc2nc(ccn2)-c2n3c(nc2)C=CC=C3)cc1	IC50	=	0.07	uM	F	CELL-LINE	MCF7	438.536
Brc1ccc(cc1)C1=NC(=CC2C1C(=O)c1c(nccc1)C2=O)C(OCC)=O	IC50	=	0.2	uM	F	CELL-LINE	MCF7	439.265
Brc1ccc(cc1)C1=NC(=CC2C1C(=O)c1ncccc1C2=O)C(OCC)=O	IC50	=	0.6	uM	F	CELL-LINE	MCF7	439.265
ClCCN(CCCl)c1ccc(cc1)CCCC(=O)N\N=C\CN1C(=O)C=CC1=O	IC50	=	6.8	uM	F	CELL-LINE	MCF7	439.343
o1cc(c2c1[nH+]c(N)cc2N)CC(C)c1ccc(cc1)C(=O)NC(CCC(=O)[O-])C(=O)[O-]	GI50	=	0.027	uM	F	CELL-LINE	MCF7	439.448
S(CCCC(=O)N[O-])C[C@H](NC(=O)\C=C\c1ccccc1)C(=O)NCc1ccccc1	IC50	=	0.7	uM	F	CELL-LINE	MCF7	440.544
Clc1ccc(cc1)COc1c2c(ccc1)C1(Oc3c4c(ccc3)cccc4O1)C=CC2=O	IC50	=	10	uM	F	CELL-LINE	MCF7	440.882
FC(F)(F)C(=O)Nc1ccccc1-c1c2c(ncc1)C(=O)c1[nH+]ccc(N(C)C)c1C2=O	IC50	=	0.1	uM	F	CELL-LINE	MCF7	441.389
Oc1nc(nc2NCC(Cc12)CCc1ccc(cc1)C(=O)NC(CCC(=O)[O-])C(=O)[O-])N	ED50	=	0.018	uM	F	CELL-LINE	MCF7	441.444
O=C1NC(=NC=2NC[C@@H](CC1=2)CCc1ccc(cc1)C(=O)N[C@@H](CCC(=O)[O-])C(=O)[O-])N	IC50	=	18	uM	F	CELL-LINE	MCF7	441.444
s1nc(cc1[N-]C(=O)C(=O)c1c2c(n(c1)Cc1onc(c1)-c1ccccc1)cccc2)C	IC50	=	0.877	uM	F	CELL-LINE	MCF7	441.491
Clc1cc(Cl)c(Cl)cc1OCCCCCC\N=C(\Nc1cc[nH+]cc1)/NC#N	IC50	=	0.0044	uM	F	CELL-LINE	MCF7	441.77
FC(F)(F)C(=O)Nc1ccccc1-c1c2c(ncc1)C(=O)c1nccc([N+](=O)[O-])c1C2=O	IC50	=	0.7	uM	F	CELL-LINE	MCF7	442.309
O1C[C@H]2[C@@H]([C@@H](c3c(C2)cc2OCOc2c3)c2cc(OC)c(OC(=O)C[NH3+])c(OC)c2)C1=O	ED50	=	0.031	uM	F	CELL-LINE	MCF7	442.444
Oc1c2c(C(=O)C=C(C(OC(=O)c3cc4c(cc3)cccc4)C\C=C(\C)/C)C2=O)c(O)cc1	IC50	=	93	uM	F	CELL-LINE	MCF7	442.467
O1c2c(ccc(O)c2)C(=C(c2ccccc2)C1=O)c1ccc(OCC[NH+]2CCCCC2)cc1	IC50	=	0.425	uM	F	CELL-LINE	MCF7	442.535
O1c2c(ccc(O)c2)C(=C(c2ccccc2)C1=O)c1cc(OCC[NH+]2CCCCC2)ccc1	IC50	=	0.085	uM	F	CELL-LINE	MCF7	442.535
Oc1ccc(NCc2cc(O)ccc2O)cc1C(=O)NCCCCCCCCCCCC	IC50	=	1	uM	F	CELL-LINE	MCF7	442.6
s1c-2c(c3c1cccc3)C(Oc1c-2cccc1)c1ccc(OCC[NH+]2CCCCC2)cc1	IC50	=	0.08	uM	F	CELL-LINE	MCF7	442.603
Oc1nc(nc2NCC([NH2+]Cc3ccc(cc3)C(=O)NC(CCC(=O)[O-])C(=O)[O-])Cc12)N	ED50	=	1.2	uM	F	CELL-LINE	MCF7	443.44
O(CC[NH+]1CCCCC1)c1ccc(cc1)C1(N(CCc2c1ccc(O)c2)c1ccccc1)C	IC50	=	0.004	uM	F	CELL-LINE	MCF7	443.611
O(CC[NH+]1CCCC1)c1ccc(cc1)C1(N(CCc2c1ccc(O)c2)c1ccc(cc1)C)C	IC50	=	0.0041	uM	F	CELL-LINE	MCF7	443.611
Clc1ncnc2n(cnc12)C\C=C/1\OC(=O)C(OC)=C\1OCc1ccc([N+](=O)[O-])cc1	IC50	=	15.43	uM	F	CELL-LINE	MCF7	443.803
Clc1ncnc2n(cnc12)C\C=C\1/OC(=O)C(OCc2ccc([N+](=O)[O-])cc2)=C/1OC	IC50	=	14.21	uM	F	CELL-LINE	MCF7	443.803
O1c2c(OC1)cc1c(c2)C(=O)[C@@H](CO)[C@H](C(OC)=O)[C@@H]1c1cc(OC)c(OC)c(OC)c1	GI50	=	17.5	uM	F	CELL-LINE	MCF7	444.436
Oc1nc(nc(N)c1CCCCNc1ccc(cc1)C(=O)NC(CCC(=O)[O-])C(=O)[O-])N	IC50	=	5	uM	F	CELL-LINE	MCF7	444.448
Oc1nc(nc(N)c1CCCNc1ccc(cc1C)C(=O)NC(CCC(=O)[O-])C(=O)[O-])N	IC50	=	0.25	uM	F	CELL-LINE	MCF7	444.448
O(C)c1c(OC)cc(cc1OC)/C(=C\c1ccc(OC)cc1)/C(OCC[NH+](CC)CC)=O	ED50	=	2.1	uM	F	CELL-LINE	MCF7	444.548
O(C)c1c(OC)cc(cc1OC)/C(=C\c1cc(OC)ccc1)/C(OCC[NH+](CC)CC)=O	ED50	=	10.4	uM	F	CELL-LINE	MCF7	444.548
S(C)C1=CC=C2c3c(cc(OC)c(OC)c3OC)CC[C@H](NC(=O)[C@@H]([NH3+])C)C2=CC1=O	IC50	=	10	uM	F	CELL-LINE	MCF7	445.56
S(C)C1=CC=C2c3c(cc(OC)c(OC)c3OC)CC[C@H](NC(=O)[C@H]([NH3+])C)C2=CC1=O	IC50	=	12	uM	F	CELL-LINE	MCF7	445.56
O(CC[NH+]1CCCC1)c1ccc(cc1)C1(N(CCc2c1ccc(O)c2)c1cc(O)ccc1)C	IC50	=	0.002	uM	F	CELL-LINE	MCF7	445.583
O(C(=O)C)C1C(N(C1=O)c1cc(OC)c(OC)c(OC)c1)c1cc([N+](=O)[O-])c(OC)cc1	IC50	=	0.1053	uM	F	CELL-LINE	MCF7	446.412
O1c2c(OC1)cc1c(c2)[C@H]([C@@H](C(OC)=O)[C@H](CO)[C@H]1O)c1cc(OC)c(OC)c(OC)c1	GI50	=	0.04	uM	F	CELL-LINE	MCF7	446.452
O1c2c(OC1)cc1c(c2)[C@H]([C@@H](C(OCC)=O)[C@H](CO)[C@H]1O)c1cc(OC)c(O)c(OC)c1	GI50	=	2.17	uM	F	CELL-LINE	MCF7	446.452
Oc1c2c(C(=O)c3c(C2=O)c(NCC[NH2+]CCO)ccc3NCC[NH2+]CCO)c(O)cc1	IC50	=	0.02	uM	F	CELL-LINE	MCF7	446.504
O1[C@H]2C[C@]3(C4CC=C5C[C@@H](O)CC[C@]5(C)[C@]4(CC[C@]3(C)[C@@]2(O)[C@H](C)[C@@]1(O)CC(C)C)C)C	ED50	=	150	uM	F	CELL-LINE	MCF7	446.672
ClCC(O)CNc1c2c(C(=O)c3c(cccc3)C2=O)c(NCC(O)C[NH2+]CCC)cc1	IC50	=	3.45	uM	F	CELL-LINE	MCF7	446.955
S(CCCc1c(nc(nc1O)N)N)c1ccc(cc1)C(=O)NC(CCC(=O)[O-])C(=O)[O-]	IC50	=	0.023	uM	F	CELL-LINE	MCF7	447.472
Fc1ccc(N2CCc3c(ccc(O)c3)C2(C)c2ccc(OCC[NH+]3CCCC3)cc2)cc1	IC50	=	0.0035	uM	F	CELL-LINE	MCF7	447.574
Fc1cc(N2CCc3c(ccc(O)c3)C2(C)c2ccc(OCC[NH+]3CCCC3)cc2)ccc1	IC50	=	0.0038	uM	F	CELL-LINE	MCF7	447.574
Fc1cc(NCCCc2c(nc(nc2O)N)N)ccc1C(=O)NC(CCC(=O)[O-])C(=O)[O-]	IC50	=	0.033	uM	F	CELL-LINE	MCF7	448.411
Fc1cc(ccc1NCCCc1c(nc(nc1O)N)N)C(=O)NC(CCC(=O)[O-])C(=O)[O-]	IC50	=	0.063	uM	F	CELL-LINE	MCF7	448.411
o1c2c(ccc(OC)c2)c(C(=O)c2cc(OC)c(OC)c(OC)c2)c1-c1ccc(OC)cc1	IC50	=	0.034	uM	F	CELL-LINE	MCF7	448.471
S(=O)(=O)(N1C[C@@H](NC1=O)c1ccccc1)c1cc2CCN(c2cc1)C(=O)c1ccncc1	IC50	=	0.1	uM	F	CELL-LINE	MCF7	448.503
S(=O)(=O)(Nc1ccc(cc1)\C=C\C(=O)Nc1ccccc1N)c1ccc(cc1)C(C)(C)C	IC50	=	7	uM	F	CELL-LINE	MCF7	449.575
S1c2cc(O)ccc2O[C@H]([C@H]1c1ccc(O)cc1)c1ccc(N2CCC[NH+](CC2)C)cc1	IC50	=	0.029	uM	F	CELL-LINE	MCF7	449.595
S1c2cc(O)ccc2O[C@H]([C@H]1c1ccc(O)cc1)c1ccc(N2CC[NH+](CC2)CC)cc1	IC50	=	0.0014	uM	F	CELL-LINE	MCF7	449.595
Brc1c(OC)c(OC)c(OC)cc1Cc1nc2c(ncnc2N)n1CCCC	IC50	=	25.1189	uM	F	CELL-LINE	MCF7	450.337
FC1=CN(C\C=C\2/OC(=O)C(OCc3ccccc3)=C/2OCc2ccccc2)C(=O)NC1=O	IC50	=	60	uM	F	CELL-LINE	MCF7	450.422
Fc1c(COC(=O)CCC[NH+](C)C)c(F)c2OC(=CC(=O)c2c1N)c1cc(F)c(N)cc1	IC50	=	0.029	uM	F	CELL-LINE	MCF7	450.437
S1c2cc(O)ccc2O[C@H]([C@H]1c1cc(O)ccc1)c1ccc(OCC[NH+]2CCCC2)cc1	IC50	=	0.0006	uM	F	CELL-LINE	MCF7	450.579
S1c2cc(O)ccc2O[C@H]([C@H]1c1ccc(O)cc1)c1ccc(OCC[NH+]2CCCC2)cc1	IC50	=	0.0033	uM	F	CELL-LINE	MCF7	450.579
O1c2c(CCC1(COC(=O)CCCC)C)c(C)c(OC(=O)[C@@H]([NH3+])CCCC[NH3+])c(C)c2C	IC50	=	15	uM	F	CELL-LINE	MCF7	450.62
Oc1nc(nc2ncc(N(Cc3ccc(cc3)C(=O)NC(CCC(=O)[O-])C(=O)[O-])C)cc12)N	ED50	=	35	uM	F	CELL-LINE	MCF7	452.427
O=C(N[C@@H](CCC(=O)[O-])C(=O)[O-])c1ccc(N(Cc2nc3c(nc(nc3N)N)nc2)C)cc1	IC50	=	0.036	uM	F	CELL-LINE	MCF7	452.431
O(C)c1cc2c3c([nH]c2cc1)c(O)c(-c1c(cc2c([nH]c4c2cc(OC)cc4)c1O)C)c(c3)C	GI50	=	4.49	uM	F	CELL-LINE	MCF7	452.51
O1c2c3c(ccc2)cccc3OC12C=CC(=O)c1c2cccc1OC\C=C(\CC\C=C(\C)/C)/C	IC50	=	4.6	uM	F	CELL-LINE	MCF7	452.55
S(=O)(=O)(NCCC[NH+](C)C)c1ccc(Nc2nc(ccn2)-c2n3c(nc2)C=CC=C3)cc1	IC50	=	0.07	uM	F	CELL-LINE	MCF7	452.563
S(=O)(=O)(Nc1ccc(cc1)\C=C\C(=O)Nc1ccccc1N)c1cc(OC)c(OC)cc1	IC50	=	6	uM	F	CELL-LINE	MCF7	453.519
S(=O)(=O)(Nc1cc(OC)c(OC)cc1)c1ccc(cc1)\C=C\C(=O)Nc1ccccc1N	IC50	=	11	uM	F	CELL-LINE	MCF7	453.519
s1cccc1C(=O)N1CCc2cc(S(=O)(=O)N3C[C@@H](NC3=O)c3ccccc3)ccc12	GI50	=	0.03	uM	F	CELL-LINE	MCF7	453.543
S(CCCC(=O)N[O-])C[C@H](NC(=O)c1[nH]c2c(c1)cccc2)C(=O)NCc1ccccc1	IC50	=	0.84	uM	F	CELL-LINE	MCF7	453.543
Clc1c(OC)c(OC)c(OC)cc1Cc1nc2c(nc(F)nc2N)n1CCOC(C)C	IC50	=	5.37032	uM	F	CELL-LINE	MCF7	453.902
Clc1cc(F)ccc1\C=C\S(=O)(=O)Cc1ccc(Nc2ncnc3c2cccc3)cc1	GI50	=	21	uM	F	CELL-LINE	MCF7	453.925
FC(F)(F)C(=O)Nc1ccccc1-c1c2c(ncc1)C(=O)c1[nH+]ccc(NC(=O)C)c1C2=O	IC50	=	0.09	uM	F	CELL-LINE	MCF7	455.372
O1C[C@H]2[C@@H]([C@@H](c3c(C2)cc2OCOc2c3)c2cc(OC)c(OC(=O)NCC)c(OC)c2)C1=O	ED50	=	0.142	uM	F	CELL-LINE	MCF7	455.463
Oc1nc(nc2NCC(Nc12)CCCc1ccc(cc1)C(=O)NC(CCC(=O)[O-])C(=O)[O-])N	IC50	=	4.5	uM	F	CELL-LINE	MCF7	456.459
O1C[C@H]2[C@@H]([C@@H](c3c(C2)cc2OCOc2c3)c2cc(OC)c(OC(=O)[C@@H]([NH3+])C)c(OC)c2)C1=O	ED50	=	0.011	uM	F	CELL-LINE	MCF7	456.471
O1C[C@H]2[C@@H]([C@@H](c3c(C2)cc2OCOc2c3)c2cc(OC)c(OC(=O)CC[NH3+])c(OC)c2)C1=O	ED50	=	0.083	uM	F	CELL-LINE	MCF7	456.471
O1c2c(ccc(O)c2)C(=C(c2ccccc2)C1=O)c1ccc(OCCC[NH+]2CCCCC2)cc1	IC50	=	0.335	uM	F	CELL-LINE	MCF7	456.562
O1c2c(ccc(O)c2)C(Cc2ccc(OCC[NH+]3CCCCC3)cc2)=C(c2ccccc2)C1=O	IC50	=	0.0077	uM	F	CELL-LINE	MCF7	456.562
O1c2c(ccc(O)c2)C(=C(c2ccccc2)C1=O)c1cc(OCCC[NH+]2CCCCC2)ccc1	IC50	=	0.0095	uM	F	CELL-LINE	MCF7	456.562
s1c2c(-c3c(N(CCC[NH+](C)C)C2=O)cccc3)c2c1cc(cc2)C(=O)Nc1ccccc1	IC50	=	2.63	uM	F	CELL-LINE	MCF7	456.59
s1c2c(c3c(nc2O)cccc3)c2c1cc(cc2)C(=O)N(CCC[NH+](C)C)c1ccccc1	IC50	=	19.5	uM	F	CELL-LINE	MCF7	456.59
Brc1ccc(cc1)CCNC(=O)c1cc(NCc2cc(O)ccc2O)ccc1O	IC50	=	7	uM	F	CELL-LINE	MCF7	457.324
O1C[C@H]2[C@@H]([C@@H](c3c(cc4OCOc4c3)[C@H]2NC(=O)N[O-])c2cc(OC)c(O)c(OC)c2)C1=O	GI50	=	7.76247	uM	F	CELL-LINE	MCF7	457.415
Oc1nc(nc2NCC([NH+](Cc3ccc(cc3)C(=O)NC(CCC(=O)[O-])C(=O)[O-])C)Cc12)N	ED50	=	4.5	uM	F	CELL-LINE	MCF7	457.467
O=C(N(CCc1c2c([nH]c1)cccc2)CC(=O)N\C=C/c1c2c([nH]c1)cccc2)CNC(=O)C	IC50	=	4.1	uM	F	CELL-LINE	MCF7	457.534
S(CCCC(=O)N[O-])C[C@H](NC(=O)c1ccc(N(C)C)cc1)C(=O)NCc1ccccc1	IC50	=	0.59	uM	F	CELL-LINE	MCF7	457.575
O(CC[NH+]1CCCCCC1)c1ccc(cc1)C1(N(CCc2c1ccc(O)c2)c1ccccc1)C	IC50	=	0.006	uM	F	CELL-LINE	MCF7	457.638
O(CC[NH+]1CCCCC1)c1ccc(cc1)C1(N(CCc2c1ccc(O)c2)c1ccc(cc1)C)C	IC50	=	0.004	uM	F	CELL-LINE	MCF7	457.638
O1c2c(OC1)cc1c(c2)C(=O)[C@@H](CO)[C@H](C(OCC)=O)[C@@H]1c1cc(OC)c(OC)c(OC)c1	GI50	=	5.14	uM	F	CELL-LINE	MCF7	458.463
O1C[C@H]2[C@@H]([C@@H](c3c(cc4OCOc4c3)[C@H]2[NH2+]CC[NH2+]C)c2cc(OC)c(O)c(OC)c2)C1=O	GI50	=	0.01445	uM	F	CELL-LINE	MCF7	458.511
O1c2cc(O)ccc2-c2oc3cc(O)ccc3c2C1c1ccc(OCC[NH+]2CCCCC2)cc1	EC50	=	0.04	uM	F	CELL-LINE	MCF7	458.534
s1c-2c(c3c1cccc3)C(Oc1cc(O)ccc1-2)c1ccc(OCC[NH+]2CCCCC2)cc1	IC50	=	0.02	uM	F	CELL-LINE	MCF7	458.602
s1c-2c(c3c1cc(O)cc3)C(Oc1c-2cccc1)c1ccc(OCC[NH+]2CCCCC2)cc1	IC50	=	0.006	uM	F	CELL-LINE	MCF7	458.602
O(C)c1cc(OC)cc2N(CC(OCc3ccccc3)=O)C(=O)C(=Cc12)c1ccc(OC)cc1	IC50	=	10	uM	F	CELL-LINE	MCF7	459.498
O(CC[NH+]1CCCCC1)c1ccc(cc1)C1(N(CCc2c1ccc(O)c2)c1cc(O)ccc1)C	IC50	=	0.002	uM	F	CELL-LINE	MCF7	459.61
Brc1cc(Br)cc2c1NC(CC2=O)c1ccc(Br)cc1	GI50	=	0.151	uM	F	CELL-LINE	MCF7	459.963
O(C)c1cc(ccc1NCCCc1c(nc(nc1O)N)N)C(=O)NC(CCC(=O)[O-])C(=O)[O-]	IC50	=	5	uM	F	CELL-LINE	MCF7	460.447
O1c2c(OC1)cc1c(c2)[C@H]([C@@H](C(OCC)=O)[C@H](CO)[C@H]1O)c1cc(OC)c(OC)c(OC)c1	GI50	=	14.3	uM	F	CELL-LINE	MCF7	460.479
s1c-2c(c3c1cc(O)cc3)C(Oc1cc(O)ccc1-2)c1ccc(OCC[NH+]2CCCC2)cc1	IC50	=	0.0006	uM	F	CELL-LINE	MCF7	460.574
s1c2c(cc1-c1n(c3c(cccc3)c1C1=CC(=O)NC1=O)CCCSC(N)=N)cccc2	GI50	=	0.02	uM	F	CELL-LINE	MCF7	460.582
s1c2c(ccc(O)c2)c(Cc2ccc(OCC[NH+]3CCCCC3)cc2)c1-c1ccc(O)cc1	IC50	=	0.00019	uM	F	CELL-LINE	MCF7	460.618
O[C@H]1C[C@H](O)C\C(=C\C=C/2\[C@@H]3CC[C@H]([C@H](OCCCC(O)(CC)CC)C)[C@]3(CCC\2)C)\C1=C	ED50	=	0.00027	uM	F	CELL-LINE	MCF7	460.699
ClCC(O)CNc1c2c(C(=O)c3c(cccc3)C2=O)c(NCC(O)C[NH+](CC)CC)cc1	IC50	=	0.43	uM	F	CELL-LINE	MCF7	460.982
O=C(NC(c1ccccc1)c1ccccc1)C(NC(=O)n1nnc2c1cccc2)c1ccccc1	IC50	=	34.2	uM	F	CELL-LINE	MCF7	461.525
Fc1ccc(N2CCc3c(ccc(O)c3)C2(C)c2ccc(OCC[NH+]3CCCCC3)cc2)cc1	IC50	=	0.006	uM	F	CELL-LINE	MCF7	461.601
s1c2c(ccc(O)c2)c(Nc2ccc(OCC[NH+]3CCCCC3)cc2)c1-c1ccc(O)cc1	IC50	=	0.0001	uM	F	CELL-LINE	MCF7	461.606
P(OC1CC[N+](CC1)(C)C)(OCCCCCCCCCCCCCCCCCC)(=O)[O-]	IC50	=	75.8	uM	F	CELL-LINE	MCF7	461.668
S(=O)(=O)(N1C[C@@H](NC1=O)c1ccccc1)c1cc2CCN(c2cc1)C(=O)c1ccc(N)cc1	GI50	=	0.01	uM	F	CELL-LINE	MCF7	462.53
s1c-2c(c3c1cc(O)cc3)C(Oc1cc(O)ccc1-2)c1ccc(OCC[NH+](CC)CC)cc1	IC50	=	0.008	uM	F	CELL-LINE	MCF7	462.59
S1c2cc(O)ccc2O[C@H]([C@H]1c1ccc(O)cc1)c1ccc(OCC[NH+]2[C@@H]3[C@H](CC2)C3)cc1	IC50	=	0.0005	uM	F	CELL-LINE	MCF7	462.59
S1c2cc(O)ccc2O[C@H]([C@H]1c1ccc(O)cc1)c1ccc(OCC[NH+]2CC3C(C3)C2)cc1	IC50	=	0.0026	uM	F	CELL-LINE	MCF7	462.59
S1c2cc(O)ccc2O[C@H]([C@H]1c1ccc(O)cc1)c1ccc(OCC[NH+]2[C@H]3[C@@H](CC2)C3)cc1	IC50	=	0.0004	uM	F	CELL-LINE	MCF7	462.59
s1c2c(ccc(O)c2)c(Oc2ccc(OCC[NH+]3CCCCC3)cc2)c1-c1ccc(O)cc1	IC50	=	5e-05	uM	F	CELL-LINE	MCF7	462.59
S1c2cc(O)ccc2O[C@H]([C@H]1c1ccc(O)cc1)c1ccc(cc1)CCC[NH+]1CCCCC1	IC50	=	0.0067	uM	F	CELL-LINE	MCF7	462.634
Clc1cc(Cl)cc(Cl)c1OC(=O)c1ccccc1Nc1cc([nH+]cc1)C(F)(F)F	GI50	=	4.7	uM	F	CELL-LINE	MCF7	462.662
O(C)c1c(OC)cc(cc1OC)C(=O)c1c2c([nH]c1-c1cc(O)c(OC)cc1)cc(OC)cc2	IC50	=	0.045	uM	F	CELL-LINE	MCF7	463.486
Clc1cc(N2CCc3c(ccc(O)c3)C2(C)c2ccc(OCC[NH+]3CCCC3)cc2)ccc1	IC50	=	0.007	uM	F	CELL-LINE	MCF7	464.029
Clc1ccc(N2CCc3c(ccc(O)c3)C2(C)c2ccc(OCC[NH+]3CCCC3)cc2)cc1	IC50	=	0.0062	uM	F	CELL-LINE	MCF7	464.029
o1c2c(ccc(OC)c2)c(C(=O)c2cc(OC)c(OC)c(OC)c2)c1-c1cc(O)c(OC)cc1	IC50	=	0.042	uM	F	CELL-LINE	MCF7	464.47
s1c2c(ccc(OC)c2)c(C(=O)c2cc(OC)c(OC)c(OC)c2)c1-c1ccc(OC)cc1	IC50	=	0.64	uM	F	CELL-LINE	MCF7	464.538
S1c2cc(O)ccc2O[C@H]([C@H]1c1cc(O)ccc1)c1ccc(OCC[NH+]2CCCCC2)cc1	IC50	=	0.0004	uM	F	CELL-LINE	MCF7	464.606
S1c2cc(O)ccc2O[C@H]([C@H]1c1ccc(O)cc1)c1ccc(OCC[NH+]2CCCCC2)cc1	IC50	=	0.003	uM	F	CELL-LINE	MCF7	464.606
Clc1cc(NCCCc2c(nc(nc2O)N)N)ccc1C(=O)NC(CCC(=O)[O-])C(=O)[O-]	IC50	=	0.115	uM	F	CELL-LINE	MCF7	464.866
o1c2c(ccc(OC)c2)c(C(O)c2cc(OC)c(OC)c(OC)c2)c1-c1cc(O)c(OC)cc1	IC50	=	0.56	uM	F	CELL-LINE	MCF7	466.486
S(=O)(=O)(N)c1ccc(N2C3=C(C(C(C#N)=C2N)c2ccc(F)cc2)C(=O)CC(C3)(C)C)cc1	IC50	=	71.8	uM	F	CELL-LINE	MCF7	466.537
S1c2cc(O)ccc2O[C@H]([C@H]1c1ccc(O)cc1)c1ccc(OCC[NH+]2C[C@H](O)CC2)cc1	IC50	=	0.0006	uM	F	CELL-LINE	MCF7	466.578
S(=O)(=O)(N(CCC[NH+](C)C)C)c1ccc(Nc2nc(ccn2)-c2n3c(nc2)C=CC=C3)cc1	IC50	=	0.44	uM	F	CELL-LINE	MCF7	466.59
o1cc(cc1)[C@@H]1CC=C2[C@]1(CCC1[C@@]2(C)[C@H](OC(=O)C)CC2[C@@]1(C=C(OC)C(=O)C2(C)C)C)C	GI50	=	95	uM	F	CELL-LINE	MCF7	466.618
S1c2cc(O)ccc2S[C@H]([C@H]1c1ccc(O)cc1)c1ccc(OCC[NH+]2CCCC2)cc1	IC50	=	0.123	uM	F	CELL-LINE	MCF7	466.646
ClC1=CN(C\C=C\2/OC(=O)C(OCc3ccccc3)=C/2OCc2ccccc2)C(=O)NC1=O	IC50	=	60	uM	F	CELL-LINE	MCF7	466.877
O(CC[NH+]1CCCCC1)c1ccc(N2Cc3cc(O)ccc3-c3c2c2c(cc(O)cc2)cc3)cc1	IC50	=	0.001	uM	F	CELL-LINE	MCF7	467.589
S1c2cc(O)ccc2O[C@H]([C@H]1c1ccc(O)cc1)c1ccc(OCC[NH+]2C[C@H](F)CC2)cc1	IC50	=	0.0038	uM	F	CELL-LINE	MCF7	468.569
O1c2cc(O)ccc2-c2c(c3c(cc(O)cc3)cc2)C1c1ccc(OCC[NH+]2CCCCC2)cc1	IC50	=	0.0004	uM	F	CELL-LINE	MCF7	468.573
S(=O)(=O)(N1C[C@@H](NC1=O)c1ccccc1)c1cc2CCN(c2cc1)C(=O)NC1CCCCC1	GI50	=	0.15	uM	F	CELL-LINE	MCF7	468.578
FC(F)(F)C(=O)Nc1ccccc1-c1c2c(ncc1)C(=O)c1ncc(cc1C2=O)C(OCC)=O	IC50	=	0.5	uM	F	CELL-LINE	MCF7	469.375
S(C)C1=CC=C2c3c(cc(OC)c(OC)c3OC)CC[C@H](NC(=O)C(F)(F)F)C2=CC1=O	IC50	=	0.035	uM	F	CELL-LINE	MCF7	469.48
O1C[C@H]2[C@@H]([C@@H](c3c(C2)cc2OCOc2c3)c2cc(OC)c(OC(=O)NC(C)C)c(OC)c2)C1=O	ED50	=	0.166	uM	F	CELL-LINE	MCF7	469.49
S(=O)(=O)(Nc1ccc(cc1)\C=C\C(=O)Nc1ccccc1N)c1ccc(cc1)-c1ccccc1	IC50	=	29	uM	F	CELL-LINE	MCF7	469.565
Clc1cc(Cl)ccc1\C=C\S(=O)(=O)Cc1ccc(Nc2ncnc3c2cccc3)cc1	GI50	=	4	uM	F	CELL-LINE	MCF7	470.38
Clc1cc(ccc1Cl)\C=C\S(=O)(=O)Cc1ccc(Nc2ncnc3c2cccc3)cc1	GI50	=	28	uM	F	CELL-LINE	MCF7	470.38
O1C[C@H]2[C@@H]([C@@H](c3c(C2)cc2OCOc2c3)c2cc(OC)c(OC(=O)CCC[NH3+])c(OC)c2)C1=O	ED50	=	0.089	uM	F	CELL-LINE	MCF7	470.498
O1c2c(ccc(O)c2)C(Cc2ccc(OCCC[NH+]3CCCCC3)cc2)=C(c2ccccc2)C1=O	IC50	=	0.018	uM	F	CELL-LINE	MCF7	470.589
O1c2c(ccc(O)c2)C(=C(c2ccccc2)C1=O)c1cc(OCCCC[NH+]2CCCCC2)ccc1	IC50	=	0.012	uM	F	CELL-LINE	MCF7	470.589
O1c2c(ccc(O)c2)C(=C(c2ccccc2)C1=O)c1ccc(OCCCC[NH+]2CCCCC2)cc1	IC50	=	0.134	uM	F	CELL-LINE	MCF7	470.589
ClCC(O[C@@H]1CC2[C@@](C3CC[C@@]4(C(=CC[C@H]4c4ccoc4)[C@]13C)C)(C=CC(=O)C2(C)C)C)=O	GI50	=	3	uM	F	CELL-LINE	MCF7	471.037
O1C[C@H]2[C@@H]([C@@H](c3c(C2)cc2OCOc2c3)c2cc(OC)c(OC(=O)NCCO)c(OC)c2)C1=O	ED50	=	0.046	uM	F	CELL-LINE	MCF7	471.462
O(CC[NH+]1CCCC1)c1ccc(cc1)C1(N(CCc2c1ccc(O)c2)c1ccc(cc1)C(C)C)C	IC50	=	0.0032	uM	F	CELL-LINE	MCF7	471.665
O(CC[NH+]1CCCC1)c1ccc(cc1)C1(N(CCc2c1ccc(O)c2)c1cc(N(C)C)ccc1)C	IC50	=	0.032	uM	F	CELL-LINE	MCF7	472.653
Brc1cc2[nH]cc(c2cc1)-c1nc(sc1)-c1c2c([nH]c1)cc(Br)cc2	GI50	=	6.46	uM	F	CELL-LINE	MCF7	473.192
O(C)c1cc(OC)cc2N(CCC(OCc3ccccc3)=O)C(=O)C(=Cc12)c1ccc(OC)cc1	IC50	=	10	uM	F	CELL-LINE	MCF7	473.525
s1c-2c(c3c1cc(O)cc3)C(Oc1cc(O)ccc1-2)c1ccc(OCCN2CCCC2=O)cc1	IC50	=	0.009	uM	F	CELL-LINE	MCF7	473.549
Oc1nc(nc2c1cc(cc2)CN(CC#C)c1ccc(cc1)C(=O)NC(CCC(=O)[O-])C(=O)[O-])C	IC50	=	0.007	uM	F	CELL-LINE	MCF7	474.473
Oc1nccc2c1cc(cc2)C[NH+](Cc1ccc(cc1)C(=O)NC(CCC(=O)[O-])C(=O)[O-])CC#C	IC50	=	22	uM	F	CELL-LINE	MCF7	474.493
O1c2c(OC1)cc1c(c2)[C@H]([C@@H](C(OCCC)=O)[C@H](CO)[C@H]1O)c1cc(OC)c(OC)c(OC)c1	GI50	=	3.2	uM	F	CELL-LINE	MCF7	474.506
s1c2c(ccc(O)c2)c(C(=O)c2ccc(OCC[NH+]3CCCCC3)cc2)c1-c1ccc(O)cc1	IC50	=	0.0002	uM	F	CELL-LINE	MCF7	474.601
s1c-2c(c3c1cc(O)cc3)C(Oc1cc(O)ccc1-2)c1ccc(OCC[NH+]2CCCCC2)cc1	IC50	=	0.0002	uM	F	CELL-LINE	MCF7	474.601
O=C(N\C=C/c1c2c([nH]c1)cccc2)C(N(C(=O)[C@H](NC(=O)C)CC(C)C)C)Cc1ccccc1	IC50	=	0.3	uM	F	CELL-LINE	MCF7	474.605
O=C1C[C@]2(C3CC[C@]4(C[C@@H](O)CC[C@]4(C)[C@]3(CC[C@]2(C)[C@@]1(O)[C@@H](C(=O)CCC(C)C)C)C)C)C	ED50	=	130	uM	F	CELL-LINE	MCF7	474.726
Clc1ncnc2n(cnc12)C\C=C\1/OC(=O)C(OCc2ccccc2)=C/1OCc1ccccc1	IC50	=	40	uM	F	CELL-LINE	MCF7	474.904
Ic1cc2[C@@H]3[C@H]([C@@H]4CCC(=O)[C@]4(CC3)C)CCc2cc1OS(=O)(=O)N	GI50	=	1.59	uM	F	CELL-LINE	MCF7	475.347
O=C1N=C(Nc2c1cc(cc2)CN(CC#C)c1ccc(cc1)C(=O)NC(CCC(=O)[O-])C(=O)[O-])N	IC50	=	0.8	uM	F	CELL-LINE	MCF7	475.461
O=C(NC(c1ccccc1)c1ccccc1)C(NC(=O)n1nnc2c1cccc2)Cc1ccccc1	IC50	=	16.3	uM	F	CELL-LINE	MCF7	475.552
S(=O)(=O)(N1C[C@@H](NC1=O)c1ccccc1)c1cc2CCN(c2cc1)C(=O)CNc1ccccc1	GI50	=	0.15	uM	F	CELL-LINE	MCF7	476.557
s1c-2c(c3c1cc(O)cc3)C(Oc1cc(O)ccc1-2)c1ccc(OCC[NH+]2CCOCC2)cc1	IC50	=	0.006	uM	F	CELL-LINE	MCF7	476.573
S1c2cc(O)ccc2O[C@H]([C@H]1c1ccc(O)cc1)c1ccc(OCC[NH+]2CC3(CCC3)C2)cc1	IC50	=	0.0003	uM	F	CELL-LINE	MCF7	476.617
S1c2cc(O)ccc2O[C@H]([C@H]1c1ccc(O)cc1)c1ccc(OCC[NH+]2CC3C(CC3)C2)cc1	IC50	=	0.0025	uM	F	CELL-LINE	MCF7	476.617
S1c2cc(O)ccc2O[C@H]([C@H]1c1ccc(O)cc1)c1ccc(OCC[NH+]2C3CCC2CC3)cc1	IC50	=	0.0036	uM	F	CELL-LINE	MCF7	476.617
O1[C@@H](CO)[C@@H](O)[C@H](O)C[C@@H]1OC[C@H](OC)COCCCCCCCCCCCCCCCC	GI50	=	6.93	uM	F	CELL-LINE	MCF7	476.695
O1[C@@H](CO)[C@@H](O)[C@H](O)C[C@H]1OC[C@H](OC)COCCCCCCCCCCCCCCCC	GI50	=	24.45	uM	F	CELL-LINE	MCF7	476.695
O[C@@]1([C@@H](C(=O)CCC(C)C)C)[C@]2(CC[C@]3(C(CC[C@]4(C[C@@H](O)CC[C@]34C)C)[C@@]2(C[C@H]1O)C)C)C	ED50	=	5.6	uM	F	CELL-LINE	MCF7	476.742
O(NC(=O)[C@@H](Cc1ccccc1)CCCCCN/C(=N\C#N)/Nc1cc[nH+]cc1)C1CCCCC1	IC50	=	0.0017	uM	F	CELL-LINE	MCF7	477.633
O(NC(=O)[C@H](Cc1ccccc1)CCCCCN/C(=N\C#N)/Nc1cc[nH+]cc1)C1CCCCC1	IC50	=	0.0053	uM	F	CELL-LINE	MCF7	477.633
O(N(Cc1ccccc1)C(=O)CCCCCCN/C(=N\C#N)/Nc1cc[nH+]cc1)C1CCCCC1	IC50	=	0.001	uM	F	CELL-LINE	MCF7	477.633
Clc1cc(N2CCc3c(ccc(O)c3)C2(C)c2ccc(OCC[NH+]3CCCCC3)cc2)ccc1	IC50	=	0.008	uM	F	CELL-LINE	MCF7	478.056
Clc1ccc(N2CCc3c(ccc(O)c3)C2(C)c2ccc(OCC[NH+]3CCCCC3)cc2)cc1	IC50	=	0.0052	uM	F	CELL-LINE	MCF7	478.056
Clc1ccc(cc1)C1N(N=C(C1)c1ccc(Cl)cc1)C=1S\C(=C\c2ccccc2)\C(=O)N=1	IC50	=	5.2	uM	F	CELL-LINE	MCF7	478.403
S1c2cc(O)ccc2O[C@H]([C@H]1c1ccc(O)cc1)c1ccc(OCC[NH+]2C3CC(OC3)C2)cc1	IC50	=	0.0033	uM	F	CELL-LINE	MCF7	478.589
S1c2cc(O)ccc2O[C@H]([C@H]1c1ccc(O)cc1)c1ccc(cc1)COCC[NH+]1CCCCC1	IC50	=	0.0146	uM	F	CELL-LINE	MCF7	478.633
s1c2c(ccc(O)c2)c(Sc2ccc(OCC[NH+]3CCCCC3)cc2)c1-c1ccc(O)cc1	IC50	=	0.00028	uM	F	CELL-LINE	MCF7	478.657
Fc1cc2c3N(C=C(C(=O)[O-])C2=O)c2c4O[C@H](Cc4ccc2Oc3c1N1C[C@@H]([NH3+])CC1)[C@@]1(OC1)C	IC50	=	0.24	uM	F	CELL-LINE	MCF7	479.464
Clc1cc(ccc1)[C@H](O)CNC=1C=CNC(=O)C=1c1[nH]c2c(n1)c(cc(N1CCOCC1)c2)C	IC50	=	0.46	uM	F	CELL-LINE	MCF7	479.968
Brc1ccc(cc1)\C=C\S(=O)(=O)Cc1ccc(Nc2ncnc3c2cccc3)cc1	GI50	=	91	uM	F	CELL-LINE	MCF7	480.386
s1c2c(ccc(OC)c2)c(C(=O)c2cc(OC)c(OC)c(OC)c2)c1-c1cc(O)c(OC)cc1	IC50	=	0.52	uM	F	CELL-LINE	MCF7	480.537
S1c2cc(O)ccc2O[C@H]([C@H]1c1ccc(O)cc1)c1ccc(OCC[NH+]2CCC[C@H]2CO)cc1	IC50	=	0.0019	uM	F	CELL-LINE	MCF7	480.605
S1c2cc(O)ccc2O[C@H]([C@H]1c1ccc(O)cc1)c1ccc(OCC[NH+]2CCC[C@@H]2CO)cc1	IC50	=	0.0032	uM	F	CELL-LINE	MCF7	480.605
S1c2cc(O)ccc2O[C@H]([C@H]1c1ccc(O)cc1)c1ccc(OCC[NH+]2CCC(O)CC2)cc1	IC50	=	0.0075	uM	F	CELL-LINE	MCF7	480.605
o1cc(cc1)[C@@H]1CC=C2[C@]1(CCC1[C@@]2(C)[C@H](OC(=O)C)CC2[C@@]1(C=C(OCC)C(=O)C2(C)C)C)C	GI50	=	8	uM	F	CELL-LINE	MCF7	480.645
S1c2cc(O)ccc2S[C@H]([C@H]1c1ccc(O)cc1)c1ccc(OCC[NH+]2CCCCC2)cc1	IC50	=	0.112	uM	F	CELL-LINE	MCF7	480.673
S1c2cc(O)ccc2S[C@H]([C@H]1c1cc(O)ccc1)c1ccc(OCC[NH+]2CCCCC2)cc1	IC50	=	0.564	uM	F	CELL-LINE	MCF7	480.673
Fc1cc2c3N(C=C(C(=O)[O-])C2=O)c2c(Oc3c1N1C[C@@H]([NH3+])CC1)c1c(c3c(cc1)cccc3)cc2	IC50	=	1.1	uM	F	CELL-LINE	MCF7	481.483
Fc1cc2c3N(C=C(C(=O)[O-])C2=O)c2c(Oc3c1N1C[C@H]([NH3+])CC1)c1c(c3c(cc1)cccc3)cc2	IC50	=	0.46	uM	F	CELL-LINE	MCF7	481.483
Fc1cc2c3N(C=C(C(=O)[O-])C2=O)c2c(Oc3c1N1C[C@H]([NH3+])CC1)cc1c3c(ccc1c2)cccc3	IC50	=	4.3	uM	F	CELL-LINE	MCF7	481.483
Fc1cc2c3N(C=C(C(=O)[O-])C2=O)c2c(Oc3c1N1C[C@@H]([NH3+])CC1)cc1c3c(ccc1c2)cccc3	IC50	=	14.2	uM	F	CELL-LINE	MCF7	481.483
S1c2cc(O)ccc2O[C@H]([C@H]1c1ccc(O)cc1)c1ccc(OCC[NH+]2CCSCC2)cc1	IC50	=	0.0156	uM	F	CELL-LINE	MCF7	482.645
O(CC[NH+](CC)CC)c1ccc(cc1)\C(=C\CCCCC)\c1ccc(OCC[NH+](CC)CC)cc1	IC50	=	2.7	uM	F	CELL-LINE	MCF7	482.753
O(CC[NH+]1CCCCC1)c1ccc(N2C3=C(CCc4cc(O)ccc34)c3c(cc(O)cc3)C2=O)cc1	IC50	=	0.128	uM	F	CELL-LINE	MCF7	483.588
S(=O)(=O)(N(OCC1CCCCC1)CCF)CCCCCCN/C(=N\C#N)/Nc1cc[nH+]cc1	IC50	=	0.0001	uM	F	CELL-LINE	MCF7	483.633
S(=O)(=O)(N)c1ccc(N2C3=C(C(C(C(=O)N)=C2N)c2ccc(F)cc2)C(=O)CC(C3)(C)C)cc1	IC50	=	75.2	uM	F	CELL-LINE	MCF7	484.552
O1c2c(ccc(O)c2)C(=C(c2ccccc2)C1=O)c1cc(OCCCCC[NH+]2CCCCC2)ccc1	IC50	=	0.015	uM	F	CELL-LINE	MCF7	484.616
O1c2c(ccc(O)c2)C(=C(c2ccccc2)C1=O)c1ccc(OCCCCC[NH+]2CCCCC2)cc1	IC50	=	0.335	uM	F	CELL-LINE	MCF7	484.616
O1c2c(ccc(O)c2)C(Cc2ccc(OCCCC[NH+]3CCCCC3)cc2)=C(c2ccccc2)C1=O	IC50	=	0.013	uM	F	CELL-LINE	MCF7	484.616
S(=O)(=O)(N(OCC[NH+]1CCOCC1)C1CCC1)CCCCCNC(=O)NCc1cccnc1	IC50	=	0.049	uM	F	CELL-LINE	MCF7	484.642
S(=O)(=O)(CCOC(=O)N1[C@@H]2[C@]34O[C@]3([C@H](CCC4)C#C\C=C/C#C2)c2c1cccc2)c1ccccc1	IC50	=	3.1	uM	F	CELL-LINE	MCF7	485.56
O(CC[NH+]1CCCCC1)c1ccc(cc1)C1(N(CCc2c1ccc(O)c2)c1cc(ccc1)C(C)C)C	IC50	=	0.027	uM	F	CELL-LINE	MCF7	485.692
O(CC[NH+]1CCCCC1)c1ccc(cc1)C1(N(CCc2c1ccc(O)c2)c1ccc(cc1)C(C)C)C	IC50	=	0.0034	uM	F	CELL-LINE	MCF7	485.692
O(CC[NH+]1CCCCC1)c1ccc(cc1)C1(N(CCc2c1ccc(O)c2)c1cc(N(C)C)ccc1)C	IC50	=	0.036	uM	F	CELL-LINE	MCF7	486.68
S(=O)(=O)(\C=C\c1ccc(cc1F)C(F)(F)F)Cc1ccc(Nc2ncnc3c2cccc3)cc1	GI50	=	100	uM	F	CELL-LINE	MCF7	487.477
Clc1cc(F)ccc1\C=C\S(=O)(=O)Cc1ccc(Nc2ncnc3c2ccc(Cl)c3)cc1	GI50	=	15	uM	F	CELL-LINE	MCF7	488.37
O1c2c(OC1)cc1c(c2)[C@H]([C@@H](C(OCCCC)=O)[C@H](CO)[C@H]1O)c1cc(OC)c(OC)c(OC)c1	GI50	=	5.6	uM	F	CELL-LINE	MCF7	488.533
O1C[C@H]2[C@@H]([C@@H](c3c(cc4OCOc4c3)[C@H]2[NH2+]CC[NH2+]CCO)c2cc(OC)c(O)c(OC)c2)C1=O	GI50	=	0.0955	uM	F	CELL-LINE	MCF7	488.537
O1[C@H](OC(=O)C)C23[C@H](C[C@H](OC(=O)C(C)C)C=C2[C@@H]1OC(=O)C)[C@](C\C=C(\C=C)/C)(C)[C@H](CC3)C	IC50	=	1.1	uM	F	CELL-LINE	MCF7	488.621
O1C[C@H]2[C@@H]([C@@H](c3c(C2)cc2OCOc2c3)c2cc(OC)c(OCc3ccc(N)cc3)c(OC)c2)C1=O	ED50	=	0.099	uM	F	CELL-LINE	MCF7	489.524
Fc1c(COC(=O)CCCCCCCCC)c(F)c2OC(=CC(=O)c2c1N)c1cc(F)c(N)cc1	IC50	=	0.1	uM	F	CELL-LINE	MCF7	490.522
S1c2cc(O)ccc2O[C@H]([C@H]1c1ccc(O)cc1)c1ccc(OCC[NH+]2C[C@H]3[C@H](CCC3)C2)cc1	IC50	=	0.0013	uM	F	CELL-LINE	MCF7	490.644
S1c2cc(O)ccc2O[C@H]([C@H]1c1ccc(O)cc1)c1ccc(OCC[NH+]2C3CCC(CC3)C2)cc1	IC50	=	0.0016	uM	F	CELL-LINE	MCF7	490.644
S1c2cc(O)ccc2O[C@H]([C@H]1c1ccc(O)cc1)c1ccc(OCC[NH+]2C3CCC2CCC3)cc1	IC50	=	0.0022	uM	F	CELL-LINE	MCF7	490.644
O=C1C([C@@H]2CC[C@@]3(C(=CC(=O)[C@@H]4[C@@H]5CC(CC[C@@]5(CC[C@@]34C)C(=O)[O-])(C)C)[C@]2(C=C1C#N)C)C)(C)C	IC50	=	0.16	uM	F	CELL-LINE	MCF7	490.664
O1CC[NH+](CC1)CCON(C(=O)CCCCCCNC(=O)NCc1cccnc1)C1CCCCC1	IC50	=	0.00037	uM	F	CELL-LINE	MCF7	490.669
ClCCOC(Oc1c(OC)cc(cc1OC)[C@H]1[C@@H]2[C@@H](Cc3c1cc1OCOc1c3)COC2=O)=O	ED50	=	0.088	uM	F	CELL-LINE	MCF7	490.892
O1[C@@H](CO)[C@@H](O)[C@H](O)[C@H](O)[C@@H]1OC[C@H](OC)COCCCCCCCCCCCCCCCC	GI50	=	21.7	uM	F	CELL-LINE	MCF7	492.694
O1C(CO)C(O)C(O)C([NH3+])C1OC[C@H](OC)COCCCCCCCCCCCCCCCC	IC50	=	6.5	uM	F	CELL-LINE	MCF7	492.718
Brc1ccc(cc1)C(=O)N[C@H](C(=O)NCc1ccccc1)CSCCCC(=O)N[O-]	IC50	=	1.16	uM	F	CELL-LINE	MCF7	493.402
S(=O)(=O)(N)c1ccc(N2C3=C(C(c4c2ncnc4N)c2ccc(F)cc2)C(=O)CC(C3)(C)C)cc1	IC50	=	28.5	uM	F	CELL-LINE	MCF7	493.563
S(=O)(=O)(N1CCc2c(ccc(O)c2)C1c1ccc(OCC[NH+]2CCCC2)cc1)c1ccc(cc1)C	IC50	=	0.0298	uM	F	CELL-LINE	MCF7	493.648
S(=O)(=O)(N)c1ccc(N2C3=C(C(C4=C2N=CNC4=O)c2ccc(F)cc2)C(=O)CC(C3)(C)C)cc1	IC50	=	77.1	uM	F	CELL-LINE	MCF7	494.547
S1c2cc(O)ccc2O[C@H]([C@H]1c1ccc(O)cc1)c1ccc(OCC[NH+]2CCC(CC2)CO)cc1	IC50	=	0.0113	uM	F	CELL-LINE	MCF7	494.632
S(=O)(=O)(C(C)(C)C)CCCO[C@H](C)[C@H]1CC[C@@H]\2[C@@]1(CCC/C/2=C\C=C/1\C[C@H](O)C[C@@H](O)C\1=C)C	ED50	=	0.0096	uM	F	CELL-LINE	MCF7	494.737
ClCC(O)CNc1c2c(C(=O)c3c(cccc3)C2=O)c(NCC(O)C[NH2+]Cc2ccccc2)cc1	IC50	=	8.2	uM	F	CELL-LINE	MCF7	494.999
O1CC[NH+](CC1)CCON(Cc1ccccc1)C(=O)CCCCCN/C(=N\C#N)/Nc1cc[nH+]cc1	IC50	=	2.1e-05	uM	F	CELL-LINE	MCF7	495.628
O(CC[NH+]1CCCCC1)c1ccc(N2Cc3cc(OC)ccc3-c3c2c2c(cc(OC)cc2)cc3)cc1	IC50	=	0.019	uM	F	CELL-LINE	MCF7	495.643
Brc1cc2c(ncnc2Nc2ccc(cc2)CS(=O)(=O)\C=C\c2ccc(O)cc2)cc1	GI50	=	32	uM	F	CELL-LINE	MCF7	496.385
S(=O)(=O)(N(CCC[NH+]1CCOCC1)C1CCC1)CCCCCCNC(=O)NCc1cccnc1	IC50	=	0.0087	uM	F	CELL-LINE	MCF7	496.697
O(CC[NH+]1CCCCC1)c1ccc(N2C3=C(CCc4cc(OC)ccc34)c3c(cc(OC)cc3)C2)cc1	IC50	=	0.287	uM	F	CELL-LINE	MCF7	497.659
O1C[C@H]2[C@@H]([C@@H](c3c(C2)cc2OCOc2c3)c2cc(OC)c(OC(=O)CCCCC[NH3+])c(OC)c2)C1=O	ED50	=	0.072	uM	F	CELL-LINE	MCF7	498.552
O1c2c(ccc(O)c2)C(=C(c2ccccc2)C1=O)c1ccc(OCCCCCC[NH+]2CCCCC2)cc1	IC50	=	0.72	uM	F	CELL-LINE	MCF7	498.643
S(=O)(=O)(N(OCC[NH+]1CCOCC1)C1CCCC1)CCCCCNC(=O)NCc1cccnc1	IC50	=	0.007	uM	F	CELL-LINE	MCF7	498.669
S(=O)(=O)(N(OCC[NH+]1CCOCC1)C1CCC1)CCCCCCNC(=O)NCc1cccnc1	IC50	=	0.011	uM	F	CELL-LINE	MCF7	498.669
S(=O)(=O)([C@H](COC(=O)N1[C@@H]2[C@]34O[C@]3([C@H](CCC4)C#C\C=C/C#C2)c2c1cccc2)C)c1ccccc1	IC50	=	25	uM	F	CELL-LINE	MCF7	499.587
S(=O)(=O)(N(OCC[NH+]1CCOCC1)C1CCCCC1)CCCCCNC(=O)Nc1cc[nH+]cc1	IC50	=	0.028	uM	F	CELL-LINE	MCF7	499.677
O1CC[NH+](CC1)CCON(C(=O)CCCCCCN/C(=N\C#N)/Nc1ccccc1)C1CCCCC1	IC50	=	1.016	uM	F	CELL-LINE	MCF7	499.68
FC(F)(F)C1=CN(C\C=C\2/OC(=O)C(OCc3ccccc3)=C/2OCc2ccccc2)C(=O)NC1=O	IC50	=	40	uM	F	CELL-LINE	MCF7	500.429
S1c2cc(O)ccc2O[C@H]([C@H]1c1ccc(O)cc1)c1ccc(OCC[NH+]2CCC(F)(F)CC2)cc1	IC50	=	0.042	uM	F	CELL-LINE	MCF7	500.586
O1CC[NH+](CC1)CCON(C(=O)CCCCCCN/C(=N\C#N)/Nc1cccnc1)C1CCCCC1	IC50	=	0.0029	uM	F	CELL-LINE	MCF7	500.668
ClCCN(CCCl)c1ccc(cc1)CCCC(=O)N\N=C\c1cc(N2C(=O)C=CC2=O)ccc1	IC50	=	35.5	uM	F	CELL-LINE	MCF7	501.414
O1CC[NH+](CC1)CCON(C(=O)CCCCCCN/C(=N\C#N)/Nc1cc[nH+]cc1)C1CCCCC1	IC50	=	0.00042	uM	F	CELL-LINE	MCF7	501.676
O1CC(CC12O[C@@H]1[C@H]([C@@H]2C)[C@@]2(C(C3CC[C@]4(C\C(=N/OC)\[C@H]([NH3+])C[C@]4(C)[C@]3(C[C@H]2O)C)C)=C1)C)(C)C	ED50	=	14	uM	F	CELL-LINE	MCF7	501.732
O1C[C@]23[C@H](O[C@@H]4C[C@@H](OC(=O)/C=C\C=C\C(OCC[C@@H](C)[C@H](O)C1=O)=O)[C@@]2(C)[C@]14OC1)C=C(CC3)C	IC50	=	1.2	uM	F	CELL-LINE	MCF7	502.56
s1c-2c(c3c1cc(OC)cc3)C(Oc1cc(OC)ccc1-2)c1ccc(OCC[NH+]2CCCCC2)cc1	IC50	=	0.1	uM	F	CELL-LINE	MCF7	502.655
O[C@H]1C[C@H](O)C\C(=C\C=C/2\[C@@H]3CC[C@H](C(CCCC(O)(C)C)CCCC(O)(C)C)[C@]3(CCC\2)C)\C1=C	ED50	=	0.0012	uM	F	CELL-LINE	MCF7	502.78
O1[C@H](OC(=O)C)C23[C@H](C[C@H](OC(=O)C(C)C)C=C2[C@@H]1OC(=O)C)[C@](C\C=C(\C=C)/C)(C)[C@H](C[C@H]3O)C	IC50	=	0.9	uM	F	CELL-LINE	MCF7	504.62
S1c2cc(O)ccc2O[C@H]([C@H]1c1ccc(O)cc1)c1ccc(OCC[NH+]2C[C@H]3[C@H](CCCC3)C2)cc1	IC50	=	0.0077	uM	F	CELL-LINE	MCF7	504.671
S1c2cc(O)ccc2O[C@H]([C@H]1c1ccc(O)cc1)c1ccc(OCC[NH+]2C3CCCC2CCC3)cc1	IC50	=	0.003	uM	F	CELL-LINE	MCF7	504.671
O=C(N\C=C/c1c2c([nH]c1)cccc2)C1(N(C(=O)[C@H]2N(CCC2)C(=O)C)C2CCCCC2)CCCCC1	IC50	=	0.4	uM	F	CELL-LINE	MCF7	504.675
Clc1cc(Cl)ccc1\C=C\S(=O)(=O)Cc1ccc(Nc2ncnc3c2ccc(Cl)c3)cc1	GI50	=	25	uM	F	CELL-LINE	MCF7	504.825
O=C1C([C@@H]2CC[C@@]3(C(=CC(=O)[C@@H]4[C@@H]5CC(CC[C@@]5(CC[C@@]34C)C(OC)=O)(C)C)[C@]2(C=C1C#N)C)C)(C)C	IC50	=	0.05	uM	F	CELL-LINE	MCF7	505.699
O1[C@@]23[C@@]1(C1CC(OC(=O)[C@H](O)[C@@H](NC(OC)=O)c4ccncc4)C2(C)C1(C)C)c1c(cccc1)C(C3)C	GI50	=	2.81838	uM	F	CELL-LINE	MCF7	506.599
O1[C@@H](CO)[C@@H](O)[C@H](O)[C@@H](OC)[C@H]1OC[C@H](OC)COCCCCCCCCCCCCCCCC	GI50	=	18.2	uM	F	CELL-LINE	MCF7	506.721
O1[C@@H](CO)[C@@H](O)[C@H](O)[C@H](OC)[C@@H]1OC[C@H](OC)COCCCCCCCCCCCCCCCC	GI50	=	23.05	uM	F	CELL-LINE	MCF7	506.721
S=C(NCc1cccnc1)NCCCCCCC(=O)N(OCC[NH+]1CCOCC1)C1CCCCC1	IC50	=	0.0055	uM	F	CELL-LINE	MCF7	506.736
P(OC[C@H]1O[C@@H](N2C=C(C)C(=O)NC2=O)C[C@@H]1N=[N+]=[N-])(=O)([O-])N[C@@H](Cc1ccccc1)C(OC)=O	IC50	=	0.4	uM	F	CELL-LINE	MCF7	507.42
S1c2cc(O)ccc2O[C@H]([C@H]1c1ccc(O)cc1)c1ccc(OCC[NH+]2CCC(CC2)C(=O)N)cc1	IC50	=	0.021	uM	F	CELL-LINE	MCF7	507.631
S(=O)(=O)(N(CCC[NH+]1CCOCC1)C1CCC1)CCCCCCN/C(=N\C#N)/Nc1cc[nH+]cc1	IC50	=	0.0001	uM	F	CELL-LINE	MCF7	507.704
Clc1ccc(cc1)C1N(N=C(C1)c1ccc(Cl)cc1)C=1S\C(=C\c2ccc(OC)cc2)\C(=O)N=1	IC50	=	5.3	uM	F	CELL-LINE	MCF7	508.429
Clc1ccc(cc1)C1N(N=C(C1)c1ccc(Cl)cc1)C=1S\C(=C\c2ccccc2OC)\C(=O)N=1	IC50	=	1.4	uM	F	CELL-LINE	MCF7	508.429
S(=O)(=O)(N)c1ccc(N2C3=C(C(C4=C2N=C(NC4=O)C)c2ccc(F)cc2)C(=O)CC(C3)(C)C)cc1	IC50	=	69.8	uM	F	CELL-LINE	MCF7	508.574
S(=O)(=O)(N)c1ccc(N2C3=C(C(C(C#N)=C2NC(=O)C)c2ccc(F)cc2)C(=O)CC(C3)(C)C)cc1	IC50	=	85.9	uM	F	CELL-LINE	MCF7	508.574
S(=O)(=O)(N)c1ccc(N2C3=C(C(c4c2ncnc4NN)c2ccc(F)cc2)C(=O)CC(C3)(C)C)cc1	IC50	=	81.2	uM	F	CELL-LINE	MCF7	508.578
S1c2cc(O)ccc2O[C@H]([C@H]1c1ccc(O)cc1)c1ccc(OCC[NH+]2CCC(CC2)CCO)cc1	IC50	=	0.0425	uM	F	CELL-LINE	MCF7	508.659
O(CC[NH+](CC)CC)c1ccc(cc1)\C(=C\CCCCCCCCCCCCCC)\c1ccc(O)cc1	IC50	=	30	uM	F	CELL-LINE	MCF7	508.811
O(CC[NH+](CC)CC)c1ccc(cc1)\C(=C/CCCCCCCCCCCCCC)\c1ccc(O)cc1	IC50	=	30	uM	F	CELL-LINE	MCF7	508.811
O1C[C@H]2[C@@H]([C@@H](c3c(C2)cc2OCOc2c3)c2cc(OC)c(OC(=O)NC3CCCCC3)c(OC)c2)C1=O	ED50	=	0.197	uM	F	CELL-LINE	MCF7	509.555
S(=O)(=O)(N(OCC[NH+]1CCOCC1)C1CCCC1)CCCCCN/C(=N\C#N)/Nc1cc[nH+]cc1	IC50	=	4.1e-05	uM	F	CELL-LINE	MCF7	509.676
S(=O)(=O)(N(OCC[NH+]1CCOCC1)C1CCC1)CCCCCCN/C(=N\C#N)/Nc1cc[nH+]cc1	IC50	=	7e-06	uM	F	CELL-LINE	MCF7	509.676
P(OCC[N+](C)(C)C)(OC[C@@H](COCCCCCCCCCCCCCCCC)COC)(=O)[O-]	IC50	=	2	uM	F	CELL-LINE	MCF7	509.709
P(OCC[N+](C)(C)C)(OC[C@H](COCCCCCCCCCCCCCCCC)COC)(=O)[O-]	IC50	=	2	uM	F	CELL-LINE	MCF7	509.709
S(=O)(=O)(N)c1ccc(N2C3=C(C(C(C4=[NH+]CCN4)=C2N)c2ccc(F)cc2)C(=O)CC(C3)(C)C)cc1	IC50	=	87	uM	F	CELL-LINE	MCF7	510.614
O(CC[NH+](C(C)C)C(C)C)c1ccc(cc1)\C(=C\C(C)C)\c1ccc(OCC[NH+](C(C)C)C(C)C)cc1	IC50	=	3.6	uM	F	CELL-LINE	MCF7	510.807
BrC1=CN(C\C=C\2/OC(=O)C(OCc3ccccc3)=C/2OCc2ccccc2)C(=O)NC1=O	IC50	=	40	uM	F	CELL-LINE	MCF7	511.328
S(=O)(=O)(N(CC1CCCCC1)CC[NH+]1CCOCC1)CCCCCCNC(=O)Nc1cc[nH+]cc1	IC50	=	0.0014	uM	F	CELL-LINE	MCF7	511.732
O([C@@H]([C@H](\C=C/C=C)C)[C@H]([C@H](O)[C@H](C\C(=C/[C@@H]([C@@H](O)[C@H](\C=C/CCc1ccccc1)C)C)\C)C)C)C(=O)N	IC50	=	0.48	uM	F	CELL-LINE	MCF7	511.747
FC(F)(F)c1cc(ON2C[C@@H]([NH+](CC2=O)Cc2n(cnc2)Cc2ccc(cc2)C#N)CCCC)ccc1	IC50	=	0.004	uM	F	CELL-LINE	MCF7	512.556
O(C)c1cc(OC)cc2c1[nH]c1c2cc(C)c(-c2c(cc3c([nH]c4c3cc(OC)cc4OC)c2O)C)c1O	GI50	=	8.68	uM	F	CELL-LINE	MCF7	512.562
S(=O)(=O)(N(OCC[NH+]1CCOCC1)C1CCCC1)CCCCCCNC(=O)NCc1cccnc1	IC50	=	0.0058	uM	F	CELL-LINE	MCF7	512.696
S(=O)(=O)(N(OCC[NH+]1CCOCC1)C1CCCCC1)CCCCCNC(=O)NCc1cccnc1	IC50	=	0.0065	uM	F	CELL-LINE	MCF7	512.696
Clc1ccc(cc1)C1N(N=C(C1)c1ccc(Cl)cc1)C=1S\C(=C\c2ccc(Cl)cc2)\C(=O)N=1	IC50	=	17.3	uM	F	CELL-LINE	MCF7	512.848
Clc1ncnc2N(C3=C(C(c12)c1ccc(F)cc1)C(=O)CC(C3)(C)C)c1ccc(S(=O)(=O)N)cc1	IC50	=	85.6	uM	F	CELL-LINE	MCF7	512.993
Clc1cc(N2C[C@H]([NH+](CC2=O)Cc2n(cnc2)Cc2ccc(cc2)C#N)CS(=O)(=O)CC)ccc1	IC50	=	0.005	uM	F	CELL-LINE	MCF7	513.042
S(=O)(=O)(C(COC(=O)N1[C@@H]2[C@]34O[C@]3([C@H](CCC4)C#C\C=C/C#C2)c2c1cccc2)(C)C)c1ccccc1	IC50	=	25	uM	F	CELL-LINE	MCF7	513.614
O=C(N\C=C/c1c2c([nH]c1)cccc2)CN(CCc1c2c([nH]c1)cccc2)C(=O)[C@H](NC(=O)C)CC(C)C	IC50	=	49.9	uM	F	CELL-LINE	MCF7	513.642
S(=O)(=O)(N(OCC[NH+]1CCOCC1)C1CCCCC1)CCCCCCNC(=O)Nc1cc[nH+]cc1	IC50	=	5e-05	uM	F	CELL-LINE	MCF7	513.704
O(CC[NH+](CC)CC)c1ccc(cc1)\C(=C(/C#N)\c1ccccc1)\c1ccc(OCC[NH+](CC)CC)cc1	EC50	=	0.00028	uM	F	CELL-LINE	MCF7	513.726
S1c2cc(O)ccc2O[C@H]([C@H]1c1ccc(O)cc1)c1ccc(OCC[NH+]2CCS(=O)(=O)CC2)cc1	IC50	=	0.0263	uM	F	CELL-LINE	MCF7	514.643
Brc1cc2c(ncnc2Nc2ccc(cc2)CS(=O)(=O)\C=C\c2ccc(Cl)cc2)cc1	GI50	=	46	uM	F	CELL-LINE	MCF7	514.831
ClCCN(CCCl)c1ccc(cc1)CCCC(=O)N\N=C(/C)\c1cc(N2C(=O)C=CC2=O)ccc1	IC50	=	23.3	uM	F	CELL-LINE	MCF7	515.441
S(=O)(=O)(N(OCC[NH+]1CCOCC1)C1CCCC1)CCCCCCNC(=S)Nc1cc[nH+]cc1	IC50	=	0.00031	uM	F	CELL-LINE	MCF7	515.744
ClC[C@](O)(C)[C@@H]1Oc2c(C1)ccc1Oc3c4N(C=C(C(=O)[O-])C(=O)c4cc(F)c3N3C[C@@H]([NH3+])CC3)c12	IC50	=	0.08	uM	F	CELL-LINE	MCF7	515.925
Brc1cc2c(ncnc2Nc2ccc(cc2)CS(=O)(=O)\C=C\c2ccc(F)cc2F)cc1	GI50	=	100	uM	F	CELL-LINE	MCF7	516.366
Clc1nc(Cl)cc(c1)C(=O)N1CCc2cc(S(=O)(=O)N3C[C@@H](NC3=O)c3ccccc3)ccc12	IC50	=	0.3	uM	F	CELL-LINE	MCF7	517.393
s1cc(cc1)CC\C=C/[C@@H]([C@H](O)[C@H](\C=C(/C[C@@H]([C@@H](O)[C@@H]([C@@H](OC(=O)N)[C@H](\C=C/C=C)C)C)C)\C)C)C	IC50	=	0.85	uM	F	CELL-LINE	MCF7	517.775
O1[C@H](OC(=O)C)C23[C@H](C[C@H](OC(=O)C(CC)C)C=C2[C@@H]1OC(=O)C)[C@](C\C=C(\C=C)/C)(C)[C@H](C[C@H]3O)C	IC50	=	1.8	uM	F	CELL-LINE	MCF7	518.647
S1c2cc(O)ccc2O[C@H]([C@H]1c1ccc(O)cc1)c1ccc(OCC[NH+]2CCC3(CCCC3)CC2)cc1	IC50	=	0.0298	uM	F	CELL-LINE	MCF7	518.698
O1CCOC1([C@@H](C)[C@]1(O)[C@]2(CC[C@]3(C(CC[C@]4(C[C@@H](O)CC[C@]34C)C)[C@@]2(CC1=O)C)C)C)CCC(C)C	ED50	=	5.6	uM	F	CELL-LINE	MCF7	518.779
O1C[C@H]2[C@@H]([C@@H](c3c(cc4OCOc4c3)[C@H]2Nc2ccc([N+](=O)[O-])cc2)c2cc(OC)c(O)c(OC)c2)C1=O	ED50	=	24.5	uM	F	CELL-LINE	MCF7	520.494
O1CCOC1([C@@H](C)[C@]1(O)[C@]2(CC[C@]3(C(CC[C@]4(C[C@@H](O)CC[C@]34C)C)[C@@]2(C[C@H]1O)C)C)C)CCC(C)C	ED50	=	2.4	uM	F	CELL-LINE	MCF7	520.795
Fc1ccc(NC(Oc2c(OC)cc(cc2OC)[C@H]2[C@@H]3[C@@H](Cc4c2cc2OCOc2c4)COC3=O)=O)cc1	ED50	=	0.076	uM	F	CELL-LINE	MCF7	521.497
O=C1[C@]([C@@H]2CC[C@@]3(C(=CC(=O)C4C5CC(CC[C@@]5(CC[C@@]34C)C(OC)=O)(C)C)[C@]2(C=C1C#N)C)C)(CO)C	IC50	=	0.08	uM	F	CELL-LINE	MCF7	521.698
S(=O)(=O)(N)c1ccc(N2C3=C(C(C(C#N)=C2\N=C\OCC)c2ccc(F)cc2)C(=O)CC(C3)(C)C)cc1	IC50	=	36	uM	F	CELL-LINE	MCF7	522.601
S1c2cc(O)ccc2O[C@H]([C@H]1c1ccc(O)cc1)c1ccc(OCC[NH+]2CCC3(OCCO3)CC2)cc1	IC50	=	0.0423	uM	F	CELL-LINE	MCF7	522.642
Brc1ccc(cc1)C1=NN(C(C1)c1ccc(Cl)cc1)C=1S\C(=C\c2ccccc2)\C(=O)N=1	IC50	=	1.6	uM	F	CELL-LINE	MCF7	522.854
Clc1ccc(cc1)C1N(N=C(C1)c1ccc(Cl)cc1)C=1S\C(=C\c2cc([N+](=O)[O-])ccc2)\C(=O)N=1	IC50	=	5.3	uM	F	CELL-LINE	MCF7	523.4
Clc1ccc(cc1)C1N(N=C(C1)c1ccc(Cl)cc1)C=1S\C(=C\c2ccccc2[N+](=O)[O-])\C(=O)N=1	IC50	=	46.6	uM	F	CELL-LINE	MCF7	523.4
S(=O)(=O)(N(OCC[NH+]1CCOCC1)C1CCCCC1)CCCCCN/C(=N\C#N)/Nc1cc[nH+]cc1	IC50	=	3.6e-05	uM	F	CELL-LINE	MCF7	523.703
P(OCC[N+](C)(C)C)(OC[C@H](OC)COCCCCCCCCCCCCCCCCCC)(=O)[O-]	GI50	=	9.66	uM	F	CELL-LINE	MCF7	523.736
Ic1ccc(cc1)/C(=C(\CC)/c1ccccc1)/c1ccc(OCC[NH+]2CCCC2)cc1	IC50	=	7.3	uM	F	CELL-LINE	MCF7	524.466
S(=O)(=O)(N(CC1CCCCC1)CC[NH+]1CCOCC1)CCCCCCNC(=O)NCc1cccnc1	IC50	=	0.00093	uM	F	CELL-LINE	MCF7	524.751
S(CC(COC)COP(OCC[N+](C)(C)C)(=O)[O-])CCCCCCCCCCCCCCCC	IC50	=	2	uM	F	CELL-LINE	MCF7	525.776
S(C)C1=CC=C2c3c(cc(OC)c(OC)c3OC)CC[C@H](NC(=O)CNC(=O)C(F)(F)F)C2=CC1=O	IC50	=	12	uM	F	CELL-LINE	MCF7	526.532
O1C[C@H]2[C@@H]([C@@H](c3c(C2)cc2OCOc2c3)c2cc(OC)c(OC(=O)CCCCCCC[NH3+])c(OC)c2)C1=O	ED50	=	0.069	uM	F	CELL-LINE	MCF7	526.606
O1CC[NH+](CC1)CCON(Cc1ccccc1)C(=O)CCCCC[NH2+]C1C(Nc2cc[nH+]cc2)C(=O)C1=O	IC50	=	0.023	uM	F	CELL-LINE	MCF7	526.658
O(CC[NH+]1CCCCC1)c1cc2c(nc-3c(Cn4c-3cc3cc(OCC[NH+]5CCCCC5)ccc34)c2C)cc1	IC50	=	4.6	uM	F	CELL-LINE	MCF7	526.725
ClC1=CC2N=C3C(CN4C3=CC3C(COC(=O)[C@@](O)(C3)CC)C4=O)=C(C2C=C1C)C[NH+]1CCC(CC1)C	IC50	=	0.048	uM	F	CELL-LINE	MCF7	527.085
S(=O)(=O)(N(OCC[NH+]1CCOCC1)C1CCCCC1)CCCCCCCNC(=O)Nc1cc[nH+]cc1	IC50	=	0.0074	uM	F	CELL-LINE	MCF7	527.731
Oc1cc(ccc1)CC\C=C/[C@@H]([C@H](O)[C@H](\C=C(/C[C@@H]([C@@H](O)[C@@H]([C@@H](OC(=O)N)[C@H](\C=C/C=C)C)C)C)\C)C)C	IC50	=	0.13	uM	F	CELL-LINE	MCF7	527.746
O1[C@@H](C)[C@@H](O)[C@@H]([NH3+])C[C@@H]1O[C@@H]1c2c(C[C@](O)(C1)C(=O)C)c(O)c1c(C(=O)c3c(cccc3OC)C1=O)c2O	IC50	=	0.039	uM	F	CELL-LINE	MCF7	528.534
Brc1c(Cc2nc3c(ncnc3N)n2CCCC)c(Br)c(OC)c(OC)c1OC	IC50	=	30.1995	uM	F	CELL-LINE	MCF7	529.233
S(=O)(=O)(N1CCc2c(ccc(O)c2)C1c1ccc(OCC[NH+]2CCCC2)cc1)c1c2c(ccc1)cccc2	IC50	=	0.0513	uM	F	CELL-LINE	MCF7	529.681
S(=O)(=O)(\C=C\c1cc(C(C)(C)C)c(O)c(c1)C(C)(C)C)Cc1ccc(Nc2ncnc3c2cccc3)cc1	GI50	=	13	uM	F	CELL-LINE	MCF7	529.705
Fc1cc(ccc1)CC\C=C/[C@@H]([C@H](O)[C@H](\C=C(/C[C@@H]([C@@H](O)[C@@H]([C@@H](OC(=O)N)[C@H](\C=C/C=C)C)C)C)\C)C)C	IC50	=	0.37	uM	F	CELL-LINE	MCF7	529.737
Clc1cc(Cl)ccc1\C=C\S(=O)(=O)Cc1ccc(Nc2ncnc3c2cc(OC)c(OC)c3)cc1	GI50	=	11	uM	F	CELL-LINE	MCF7	530.432
S1c2cc(O)ccc2O[C@H]([C@H]1c1ccc(O)cc1)c1ccc(OCC[NH+]2C3CC4CC(CC(C4)C2)C3)cc1	IC50	=	0.0058	uM	F	CELL-LINE	MCF7	530.709
O(C)c1ccc(cc1)\C(=C(/CCCCCCCCCCC[NH2+]CC[NH3+])\c1ccccc1)\c1ccc(OC)cc1	IC50	=	14	uM	F	CELL-LINE	MCF7	530.797
s1ccc(C)c1CC\C=C/[C@@H]([C@H](O)[C@H](\C=C(/C[C@@H]([C@@H](O)[C@@H]([C@@H](OC(=O)N)[C@H](\C=C/C=C)C)C)C)\C)C)C	IC50	=	0.37	uM	F	CELL-LINE	MCF7	531.802
Ic1cc(ccc1)CNc1nc(nc2n(cnc12)C1CCCC1)NC1CCC([NH3+])CC1	IC50	=	0.6	uM	F	CELL-LINE	MCF7	532.454
O1C[C@H]2[C@@H]([C@@H](c3c(C2)cc2OCOc2c3)c2cc(OC)c(OC(=O)[C@@H]([NH3+])Cc3ccccc3)c(OC)c2)C1=O	ED50	=	0.072	uM	F	CELL-LINE	MCF7	532.569
O1C[C@H]2[C@@H]([C@@H](c3c(C2)cc2OCOc2c3)c2cc(OC)c(OC(=O)Nc3ccc(OC)cc3)c(OC)c2)C1=O	ED50	=	0.093	uM	F	CELL-LINE	MCF7	533.533
O1C(CO)C(O)C(O)C(NC(=O)C)C1OC[C@H](OC)COCCCCCCCCCCCCCCCC	IC50	=	17	uM	F	CELL-LINE	MCF7	533.747
S(=O)(=O)(N)c1ccc(N2C3=C(C(c4c2ncnc4N=C=S)c2ccc(F)cc2)C(=O)CC(C3)(C)C)cc1	IC50	=	85.6	uM	F	CELL-LINE	MCF7	535.624
S(=O)(=O)(N(CCC[NH+]1CCOCC1)C1CCCCC1)CCCCCCN/C(=N\C#N)/Nc1cc[nH+]cc1	IC50	=	0.00011	uM	F	CELL-LINE	MCF7	535.758
O(CC[NH+](C(C)C)C(C)C)c1ccc(cc1)C(=C1CCCCC1)c1ccc(OCC[NH+](C(C)C)C(C)C)cc1	IC50	=	30	uM	F	CELL-LINE	MCF7	536.845
S(=O)(=O)(N(OCC[NH+]1CCOCC1)C1CCCCC1)CCCCCCN/C(=N\C#N)/Nc1cc[nH+]cc1	IC50	=	0.00033	uM	F	CELL-LINE	MCF7	537.73
Ic1ccc(cc1)/C(=C(\CC)/c1ccccc1)/c1ccc(OCCC[NH+]2CCCC2)cc1	IC50	=	4.5	uM	F	CELL-LINE	MCF7	538.493
Brc1ccc(cc1)\C=C\S(=O)(=O)Cc1ccc(Nc2ncnc3c2cc(OC)c(OC)c3)cc1	GI50	=	32	uM	F	CELL-LINE	MCF7	540.438
FC(F)(F)c1ccccc1-c1oc(cc1)COc1c2c(ccc1)C1(Oc3c4c(ccc3)cccc4O1)C=CC2=O	IC50	=	5	uM	F	CELL-LINE	MCF7	540.493
FC(F)(F)c1cc(ccc1)-c1oc(cc1)COc1c2c(ccc1)C1(Oc3c4c(ccc3)cccc4O1)C=CC2=O	IC50	=	5.5	uM	F	CELL-LINE	MCF7	540.493
O1CC[NH+](CC1)CCON(Cc1ccccc1)C(=O)CCCCCC[NH2+]C1C(Nc2cc[nH+]cc2)C(=O)C1=O	IC50	=	0.0123	uM	F	CELL-LINE	MCF7	540.685
o1cc(cc1)[C@@H]1CC=C2[C@]1(CCC1[C@@]3(C(C[C@@H](OC(=O)C)[C@]12C)C(C)(C)[C@H](OC(=O)C)C[C@@H]3OC(=O)C)C)C	GI50	=	4	uM	F	CELL-LINE	MCF7	540.697
S(=O)(=O)(N(OCC[NH+]1CCOCC1)C1CCCC1)CCCCC[NH2+]C1C(Nc2cc[nH+]cc2)C(=O)C1=O	IC50	=	0.0463	uM	F	CELL-LINE	MCF7	540.706
S(=O)(=O)(N(OCC[NH+]1CCOCC1)C1CCC1)CCCCCC[NH2+]C1C(Nc2cc[nH+]cc2)C(=O)C1=O	IC50	=	0.0291	uM	F	CELL-LINE	MCF7	540.706
S(=O)(=O)(N(OCC[NH+]1CCOCC1)C1CCCCC1)CCCCCCCNC(=O)NCc1cccnc1	IC50	=	0.0036	uM	F	CELL-LINE	MCF7	540.75
Oc1cccc(CC\C=C/[C@@H]([C@H](O)[C@H](\C=C(/C[C@@H]([C@@H](O)[C@@H]([C@@H](OC(=O)N)[C@H](\C=C/C=C)C)C)C)\C)C)C)c1C	IC50	=	0.49	uM	F	CELL-LINE	MCF7	541.773
O(C)c1cc(ccc1)CC\C=C/[C@@H]([C@H](O)[C@H](\C=C(/C[C@@H]([C@@H](O)[C@@H]([C@@H](OC(=O)N)[C@H](\C=C/C=C)C)C)C)\C)C)C	IC50	=	0.33	uM	F	CELL-LINE	MCF7	541.773
Oc1cc(ccc1C)CC\C=C/[C@@H]([C@H](O)[C@H](\C=C(/C[C@@H]([C@@H](O)[C@@H]([C@@H](OC(=O)N)[C@H](\C=C/C=C)C)C)C)\C)C)C	IC50	=	0.77	uM	F	CELL-LINE	MCF7	541.773
ClCC(=O)NC=1N(C2=C(C(C=1C#N)c1ccc(F)cc1)C(=O)CC(C2)(C)C)c1ccc(S(=O)(=O)N)cc1	IC50	=	70.8	uM	F	CELL-LINE	MCF7	543.019
Oc1cc(cc(O)c1)CC\C=C/[C@@H]([C@H](O)[C@H](\C=C(/C[C@@H]([C@@H](O)[C@@H]([C@@H](OC(=O)N)[C@H](\C=C/C=C)C)C)C)\C)C)C	IC50	=	0.16	uM	F	CELL-LINE	MCF7	543.745
Fc1cc(ccc1C)CC\C=C/[C@@H]([C@H](O)[C@H](\C=C(/C[C@@H]([C@@H](O)[C@@H]([C@@H](OC(=O)N)[C@H](\C=C/C=C)C)C)C)\C)C)C	IC50	=	1	uM	F	CELL-LINE	MCF7	543.764
O1[C@@H](C)[C@@H](O)[C@@H]([NH3+])C[C@@H]1O[C@@H]1c2c(C[C@](O)(C1)C(=O)CO)c(O)c1c(C(=O)c3c(cccc3OC)C1=O)c2O	IC50	=	0.05	uM	F	CELL-LINE	MCF7	544.533
O1[C@@H](C)[C@@H](O)[C@H]([NH3+])C[C@@H]1O[C@@H]1c2c(C[C@](O)(C1)C(=O)CO)c(O)c1c(C(=O)c3c(cccc3OC)C1=O)c2O	IC50	=	0.2	uM	F	CELL-LINE	MCF7	544.533
O1CCOC1([C@@H](C)[C@]1(O)[C@]2(CC[C@]3(C(CC=C4C[C@@H](OC(=O)C)CC[C@]34C)[C@@]2(CC1=O)C)C)C)CCC(C)C	ED50	=	28	uM	F	CELL-LINE	MCF7	544.773
Brc1cc(ccc1OCC[NH+]1CCCC1)[C@@H]1Sc2c(S[C@@H]1c1ccc(O)cc1)cc(O)cc2	IC50	=	0.114	uM	F	CELL-LINE	MCF7	545.542
S(=O)(=O)(CCOC(=O)N1[C@@H]2[C@]34O[C@]3([C@@H](CCC4)C#C\C=C/C#C2)c2cc(OCCO)ccc12)c1ccccc1	IC50	=	0.78	uM	F	CELL-LINE	MCF7	545.612
S(=O)(=O)(N(OCc1ccccc1)CC[NH+]1CCOCC1)CCCCCCN/C(=N\C#N)/Nc1cc[nH+]cc1	IC50	=	0.00063	uM	F	CELL-LINE	MCF7	545.709
Clc1cc(ccc1)CC\C=C/[C@@H]([C@H](O)[C@H](\C=C(/C[C@@H]([C@@H](O)[C@@H]([C@@H](OC(=O)N)[C@H](\C=C/C=C)C)C)C)\C)C)C	IC50	=	0.4	uM	F	CELL-LINE	MCF7	546.192
P(OC[C@H]1O[C@@H](N2C=C(C)C(=O)NC2=O)C[C@@H]1N=[N+]=[N-])(=O)([O-])N[C@@H](Cc1c2c([nH]c1)cccc2)C(OC)=O	IC50	=	0.059	uM	F	CELL-LINE	MCF7	546.457
Fc1cc(cc(F)c1)CC\C=C/[C@@H]([C@H](O)[C@H](\C=C(/C[C@@H]([C@@H](O)[C@@H]([C@@H](OC(=O)N)[C@H](\C=C/C=C)C)C)C)\C)C)C	IC50	=	0.6	uM	F	CELL-LINE	MCF7	547.727
S(=O)(=O)(N)c1ccc(N2C3=C(C(C(C#N)=C2N2C(=O)CCC2=O)c2ccc(F)cc2)C(=O)CC(C3)(C)C)cc1	IC50	=	94.1	uM	F	CELL-LINE	MCF7	548.595
O(C(OC[C@H](OC)COCCCCCCCCCCCCCCCCCC)=O)[C@H]1[C@@H](O)[C@@H](O)[C@H](O)C[C@H]1O	IC50	=	12	uM	F	CELL-LINE	MCF7	548.758
Brc1cc2c(ncnc2Nc2ccc(cc2)CS(=O)(=O)\C=C\c2ccc(Cl)cc2Cl)cc1	GI50	=	4	uM	F	CELL-LINE	MCF7	549.276
Brc1cc2c(ncnc2Nc2ccc(cc2)CS(=O)(=O)\C=C\c2cc(Cl)c(Cl)cc2)cc1	GI50	=	14	uM	F	CELL-LINE	MCF7	549.276
o1cc(cc1)[C@@H]1CC=C2[C@]1(CCC1[C@@]2(C)[C@H](OC(=O)C)CC2[C@@]1(C=C\C(=N/OCC[NH+]1CCCC1)\C2(C)C)C)C	GI50	=	3	uM	F	CELL-LINE	MCF7	549.776
O1C[C@H]2[C@@H]([C@@H](c3c(cc4OCOc4c3)[C@H]2Nc2cc([N+](=O)[O-])ccc2OC)c2cc(OC)c(O)c(OC)c2)C1=O	ED50	=	2400	uM	F	CELL-LINE	MCF7	550.52
O1C[C@H]2[C@@H]([C@@H](c3c(cc4OCOc4c3)[C@H]2Nc2ccc([N+](=O)[O-])cc2OC)c2cc(OC)c(O)c(OC)c2)C1=O	ED50	=	5000	uM	F	CELL-LINE	MCF7	550.52
O1C[C@H]2[C@@H]([C@@H](c3c(cc4OCOc4c3)[C@H]2Nc2ccc(OC)cc2[N+](=O)[O-])c2cc(OC)c(O)c(OC)c2)C1=O	ED50	=	2500	uM	F	CELL-LINE	MCF7	550.52
S(=O)(=O)(N)c1ccc(N2C3=C(C(C(C#N)=C2N(C(=O)C)C(=O)C)c2ccc(F)cc2)C(=O)CC(C3)(C)C)cc1	IC50	=	79.7	uM	F	CELL-LINE	MCF7	550.611
Brc1ccc(cc1)-c1oc(cc1)COc1c2c(ccc1)C1(Oc3c4c(ccc3)cccc4O1)C=CC2=O	IC50	=	5.7	uM	F	CELL-LINE	MCF7	551.392
o1cc(cc1)[C@@H]1CC=C2[C@]1(CCC1[C@@]2(C)[C@H](OC(=O)CNC(OC(C)(C)C)=O)CC2[C@@]1(C=CC(=O)C2(C)C)C)C	GI50	=	60	uM	F	CELL-LINE	MCF7	551.724
S(=O)(=O)(N(OCC[NH+]1CCOCC1)C1CCCCC1)CCCCCCCN/C(=N\C#N)/Nc1cc[nH+]cc1	IC50	=	0.00029	uM	F	CELL-LINE	MCF7	551.757
o1cc(cc1)[C@@H]1CC=C2[C@]1(CCC1[C@@]2(C)[C@H](OC(=O)C)CC2[C@@]1(C=C\C(=N/OCC[NH+](CC)CC)\C2(C)C)C)C	GI50	=	6	uM	F	CELL-LINE	MCF7	551.792
Ic1ccc(cc1)/C(=C(\CC)/c1ccccc1)/c1ccc(OCCCC[NH+]2CCCC2)cc1	IC50	=	4	uM	F	CELL-LINE	MCF7	552.52
Brc1ccc(cc1)C1=NN(C(C1)c1ccc(Cl)cc1)C=1S\C(=C\c2ccc(OC)cc2)\C(=O)N=1	IC50	=	1.7	uM	F	CELL-LINE	MCF7	552.88
Brc1ccc(cc1)C1=NN(C(C1)c1ccc(Cl)cc1)C=1S\C(=C\c2ccccc2OC)\C(=O)N=1	IC50	=	7.3	uM	F	CELL-LINE	MCF7	552.88
S(=O)(=O)(N(OCC[NH+]1CCOCC1)C1CCCC1)CCCCCC[NH2+]C1C(Nc2cc[nH+]cc2)C(=O)C1=O	IC50	=	0.0137	uM	F	CELL-LINE	MCF7	554.733
S(=O)(=O)(N(OCC[NH+]1CCOCC1)C1CCCCC1)CCCCC[NH2+]C1C(Nc2cc[nH+]cc2)C(=O)C1=O	IC50	=	0.0358	uM	F	CELL-LINE	MCF7	554.733
Brc1ccc(cc1)C1=NN(C(C1)c1ccc(Cl)cc1)C=1S\C(=C\c2ccc(Cl)cc2)\C(=O)N=1	IC50	=	2.3	uM	F	CELL-LINE	MCF7	557.299
O=C(NCCC(NC(=O)c1ccc(NCc2nc3c(nc(nc3N)N)nc2)cc1)C(=O)[O-])c1ccccc1C(=O)[O-]	IC50	=	0.006	uM	F	CELL-LINE	MCF7	557.527
P(OCC[N+](C)(C)C)(=O)([O-])CCC(n1ccnc1)COCCCCCCCCCCCCCCCCCC	IC50	=	3	uM	F	CELL-LINE	MCF7	557.801
IC1=CN(C\C=C\2/OC(=O)C(OCc3ccccc3)=C/2OCc2ccccc2)C(=O)NC1=O	IC50	=	70	uM	F	CELL-LINE	MCF7	558.328
O=C(NCCC[NH+](CCCNC(=O)c1c2nc3c(nc2ccc1)cccc3)C)c1c2nc3c(nc2ccc1)cccc3	GI50	=	0.12	uM	F	CELL-LINE	MCF7	558.666
P(OCC[N+](C)(C)C)(=O)([O-])CCC(n1ncnc1)COCCCCCCCCCCCCCCCCCC	IC50	=	3	uM	F	CELL-LINE	MCF7	558.789
Brc1ccc(cc1)\C=C\S(=O)(=O)Cc1ccc(Nc2ncnc3c2cc(Br)cc3)cc1	GI50	=	5	uM	F	CELL-LINE	MCF7	559.282
Brc1cc(ccc1OCC[NH+]1CCCCC1)[C@@H]1Sc2c(S[C@@H]1c1ccc(O)cc1)cc(O)cc2	IC50	=	0.067	uM	F	CELL-LINE	MCF7	559.569
Brc1cc(ccc1OCC[NH+]1CCCCC1)[C@@H]1Sc2c(S[C@@H]1c1cc(O)ccc1)cc(O)cc2	IC50	=	0.152	uM	F	CELL-LINE	MCF7	559.569
O(C)C1=C2C[C@H](C[C@H](OC)[C@H](O)[C@H](\C=C(/C)\[C@H](OC(=O)N)[C@@H](OC)/C=C\C=C(/C)\C(=O)NC(=CC1=O)C2=O)C)C	IC50	=	0.0065	uM	F	CELL-LINE	MCF7	560.644
O1CCOC1([C@@H](C)[C@]1(O)[C@]2(CC[C@]3(C(CC[C@]4(C[C@@H](OC(=O)C)CC[C@]34C)C)[C@@]2(CC1=O)C)C)C)CCC(C)C	ED50	=	39	uM	F	CELL-LINE	MCF7	560.816
O1c2c(CC[C@]1(CCC[C@@H](CCC[C@@H](CCCC(C)C)C)C)C)c(C)c(OC(=O)[C@@H]([NH3+])CCCC[NH3+])c(C)c2C	IC50	=	12	uM	F	CELL-LINE	MCF7	560.908
O1[C@@H](C[C@H](O)\C=C/[C@@H]([C@H](O)[C@H](\C=C(/C[C@@H]([C@@H](O)[C@@H]([C@@H](OC(=O)N)[C@H](\C=C/C=C)C)C)C)\C)C)C)[C@@H](C=CC1=O)C	IC50	=	0.0021	uM	F	CELL-LINE	MCF7	561.76
P(OC1CC[N+](CC1)(C)C)(OCCCCCCCCCCCCCC1(OCC(N1[O-])(C)C)CCCC)(=O)[O-]	IC50	=	56.4	uM	F	CELL-LINE	MCF7	561.765
O1CCOC1([C@@H](C)[C@]1(O)[C@]2(CC[C@]3(C(CC[C@]4(C[C@@H](OC(=O)C)CC[C@]34C)C)[C@@]2(C[C@H]1O)C)C)C)CCC(C)C	ED50	=	23	uM	F	CELL-LINE	MCF7	562.832
O1C[C@H]2[C@@H]([C@@H](c3c(cc4OCOc4c3)[C@H]2NC(=O)[C@@H]([NH3+])Cc2ccc(O)cc2)c2cc(OC)c(O)c(OC)c2)C1=O	ED50	=	41.7	uM	F	CELL-LINE	MCF7	563.583
O1C[C@H]2[C@@H]([C@@H](c3c(cc4OCOc4c3)[C@@H]2Nc2cc([N+](=O)[O-])cc([N+](=O)[O-])c2)c2cc(OC)c(O)c(OC)c2)C1=O	ED50	=	2500	uM	F	CELL-LINE	MCF7	565.491
O(Cc1ccccc1)c1ncc2c([nH]cc2\C=C/NC(=O)C(N(C(=O)C2N(CCC2)C(=O)C)C)Cc2ccccc2)c1	IC50	=	1.9	uM	F	CELL-LINE	MCF7	565.674
Brc1cc2c(ncnc2Nc2ccc(cc2)CS(=O)(=O)\C=C\c2ccc(cc2F)C(F)(F)F)cc1	GI50	=	32	uM	F	CELL-LINE	MCF7	566.373
Brc1ccc(cc1)C1=NN(C(C1)c1ccc(Cl)cc1)C=1S\C(=C\c2cc([N+](=O)[O-])ccc2)\C(=O)N=1	IC50	=	13.6	uM	F	CELL-LINE	MCF7	567.851
Brc1ccc(cc1)C1=NN(C(C1)c1ccc(Cl)cc1)C=1S\C(=C\c2ccccc2[N+](=O)[O-])\C(=O)N=1	IC50	=	1.6	uM	F	CELL-LINE	MCF7	567.851
S(=O)(=O)(N(OCC[NH+]1CCOCC1)C1CCCCC1)CCCCCC[NH2+]C1C(Nc2cc[nH+]cc2)C(=O)C1=O	IC50	=	0.009	uM	F	CELL-LINE	MCF7	568.76
S1(OC[C@H]2[C@H](CO1)[C@H](Nc1ccc([N+](=O)[O-])cc1)c1c(cc3OCOc3c1)[C@H]2c1cc(OC)c(O)c(OC)c1)=O	ED50	=	2.5	uM	F	CELL-LINE	MCF7	570.575
O=C(NCCCC(NC(=O)c1ccc(NCc2nc3c(nc(nc3N)N)nc2)cc1)C(=O)[O-])c1ccccc1C(=O)[O-]	IC50	=	0.0007	uM	F	CELL-LINE	MCF7	571.554
O(C)C1=C2C[C@@H](C[C@H](OC)[C@@H](O)[C@@H](\C=C(\C[C@H](OC(=O)N)[C@@H](OC)/C=C\C=C(/C)\C(=O)NC(=CC1=O)C2=O)/C)C)C	IC50	=	0.03	uM	F	CELL-LINE	MCF7	574.671
S(=O)(=O)(N(Cc1cccnc1)CCC[NH+]1CCOCC1)CCCCCC[NH2+]C1C(Nc2cc[nH+]cc2)C(=O)C1=O	IC50	=	0.0216	uM	F	CELL-LINE	MCF7	575.755
O1[C@@H](C[C@H](O)\C=C/[C@@H]([C@H](O)[C@H](\C=C(/C[C@@H]([C@@H](O)[C@@H]([C@@H](OC(=O)N)[C@H](\C=C/C=C)C)C)C)\C)C)C)[C@@H](C=C(C)C1=O)C	IC50	=	0.0056	uM	F	CELL-LINE	MCF7	575.787
O1[C@@H](C\C=C\C(=O)N[C@H](Cc2ccccc2)C(=O)NCCC(O[C@@H](CC(C)C)C1=O)=O)[C@H](C)[C@H]1O[C@@H]1c1ccccc1	ED50	=	0.00034	uM	F	CELL-LINE	MCF7	576.69
O(C(OC[C@H](OC)COCCCCCCCCCCCCCCCCCC)=O)[C@@H]1[C@H](O)[C@H](CO)[C@@H](O)[C@H](O)[C@@H]1O	IC50	=	1.2	uM	F	CELL-LINE	MCF7	578.784
O(C(OC[C@H](OC)COCCCCCCCCCCCCCCCCCC)=O)[C@@H]1[C@H](O)[C@@H](CO)[C@@H](O)[C@H](O)[C@@H]1O	IC50	=	12.5	uM	F	CELL-LINE	MCF7	578.784
S(=O)(=O)(\C=C\c1ccc(F)cc1)Cc1ccc(Nc2ncnc3c2cc(OCC[NH+]2CCOCC2)c(OC)c3)cc1	GI50	=	100	uM	F	CELL-LINE	MCF7	579.673
O1[C@@H](C[C@H](O)\C=C/[C@@H]([C@H](O)[C@H](\C=C/C[C@@H]([C@@H](O)[C@@H]([C@@H](OC(=O)N)[C@H](\C=C/C=C)C)C)C)C)C)[C@H](C)[C@H](O)[C@@H](C)C1=O	IC50	=	0.046	uM	F	CELL-LINE	MCF7	579.775
S(=O)(=O)(N(OCC[NH+]1CCOCC1)C1CCCCC1)CCCCCCC[NH2+]C1C(Nc2cc[nH+]cc2)C(=O)C1=O	IC50	=	0.008	uM	F	CELL-LINE	MCF7	582.787
S(=O)(=O)(N(OCC1CCCCC1)CC[NH+]1CCOCC1)CCCCCC[NH2+]C1C(Nc2cc[nH+]cc2)C(=O)C1=O	IC50	=	0.0108	uM	F	CELL-LINE	MCF7	582.787
P(O[C@H]1[C@@H](O)[C@@H](O)[C@H](O)C[C@H]1O)(OC[C@H](OC)COCCCCCCCCCCCCCCCCCC)(=O)[O-]	IC50	=	7.2	uM	F	CELL-LINE	MCF7	583.72
O=C(NCCCC(NC(=O)c1ccc(NCc2cnc3nc(nc(N)c3c2C)N)cc1)C(=O)[O-])c1ccccc1C(=O)[O-]	IC50	=	0.0007	uM	F	CELL-LINE	MCF7	584.593
O(CCCCCOc1cc2N=C[C@H]3N(CC(C3)=C)C(=O)c2cc1OC)c1cc2N=C[C@H]3N(CC(C3)=C)C(=O)c2cc1OC	GI50	=	9.33e-05	uM	F	CELL-LINE	MCF7	584.673
O=C(NCCCCC(NC(=O)c1ccc(NCc2nc3c(nc(nc3N)N)nc2)cc1)C(=O)[O-])c1ccccc1C(=O)[O-]	IC50	=	0.002	uM	F	CELL-LINE	MCF7	585.581
O=C(NCCC[NH+](CCCNC(=O)c1c2nc3c(nc2c(cc1)C)cccc3)C)c1c2nc3c(nc2c(cc1)C)cccc3	GI50	=	0.48	uM	F	CELL-LINE	MCF7	586.72
O=C(NCCC[NH+](CCCNC(=O)c1cc(cc2nc3c(nc12)cccc3)C)C)c1cc(cc2nc3c(nc12)cccc3)C	GI50	=	0.31	uM	F	CELL-LINE	MCF7	586.72
O=C(NCCC[NH+](CCCNC(=O)c1c2nc3c(nc2ccc1)c(ccc3)C)C)c1c2nc3c(nc2ccc1)c(ccc3)C	GI50	=	0.55	uM	F	CELL-LINE	MCF7	586.72
O=C(NCCC[NH+](CCCNC(=O)c1c2nc3c(nc2ccc1)cc(cc3)C)C)c1c2nc3c(nc2ccc1)cc(cc3)C	GI50	=	2	uM	F	CELL-LINE	MCF7	586.72
O1C[C@H]2[C@@H]([C@@H](c3c(cc4OCOc4c3)[C@H]2O[C@@H]2O[C@H]3[C@@H](O[C@@H](OC3)C)[C@H](O)[C@H]2O)c2cc(OC)c(O)c(OC)c2)C1=O	IC50	=	0.085	uM	F	CELL-LINE	MCF7	588.562
O=C1c2c3n(-c4c1cccc4)cnc3ccc2NCCC[NH+](CCCN1C(=O)c2cc([N+](=O)[O-])cc3c2c(ccc3)C1=O)C	GI50	=	0.05	uM	F	CELL-LINE	MCF7	589.632
O1C[C@H]2[C@@H]([C@@H](c3c(cc4OCOc4c3)[C@H]2Nc2ccc(cc2)-c2[nH]c3c(n2)cccc3)c2cc(OC)c(O)c(OC)c2)C1=O	ED50	=	850	uM	F	CELL-LINE	MCF7	591.62
ClCC1c2c3c(cccc3)c(O)cc2N(C1)C(=O)c1[nH]c2c(c1)cc(NC(=O)c1[nH]c3c(c1)cc(NC(=O)C)cc3)cc2	IC50	=	0.000476	uM	F	CELL-LINE	MCF7	592.055
S(=O)(=O)(\C=C\c1ccc(F)cc1)Cc1ccc(Nc2ncnc3c2cc(OCCC[NH+]2CCOCC2)c(OC)c3)cc1	GI50	=	3	uM	F	CELL-LINE	MCF7	593.7
O1[C@@H](C[C@H](O)\C=C/[C@@H]([C@H](O)[C@H](\C=C(/C[C@@H]([C@@H](O)[C@@H]([C@@H](OC(=O)N)[C@H](\C=C/C=C)C)C)C)\C)C)C)[C@H](C)[C@H](O)[C@@H](C)C1=O	IC50	=	0.028	uM	F	CELL-LINE	MCF7	593.802
Fc1c2nc3c(nc2ccc1)cccc3C(=O)NCCC[NH+](CCCNC(=O)c1c2nc3c(nc2ccc1)cccc3F)C	GI50	=	0.46	uM	F	CELL-LINE	MCF7	594.646
O(c1ccc(cc1)CC\C=C/[C@@H]([C@H](O)[C@H](\C=C(/C[C@@H]([C@@H](O)[C@@H]([C@@H](OC(=O)N)[C@H](\C=C/C=C)C)C)C)\C)C)C)c1ccccc1	IC50	=	4	uM	F	CELL-LINE	MCF7	603.844
P(=O)([O-])([O-])NC1CC(OC(C)C1O)O[C@@H]1c2c(C[C@](O)(C1)C(=O)C)c(O)c1c(C(=O)c3c(cccc3OC)C1=O)c2O	IC50	=	370	uM	F	CELL-LINE	MCF7	605.489
P(OC1C(OC(O[C@@H]2c3c(C[C@](O)(C2)C(=O)C)c(O)c2c(C(=O)c4c(cccc4OC)C2=O)c3O)CC1[NH3+])C)(=O)([O-])[O-]	IC50	=	89	uM	F	CELL-LINE	MCF7	606.497
S(=O)(=O)([O-])NC1CC(OC(C)C1O)O[C@@H]1c2c(C[C@](O)(C1)C(=O)C)c(O)c1c(C(=O)c3c(cccc3OC)C1=O)c2O	IC50	=	10400	uM	F	CELL-LINE	MCF7	606.581
O1[C@@H](C\C=C\C(=O)N[C@H](Cc2ccc(OC)cc2)C(=O)NCCC(O[C@@H](CC(C)C)C1=O)=O)[C@H](C)[C@H]1O[C@@H]1c1ccccc1	ED50	=	0.00013	uM	F	CELL-LINE	MCF7	606.716
S(=O)(CCCC(F)(F)C(F)(F)F)CCCCCCCCC[C@H]1[C@H]2[C@@H]3CC[C@H](O)[C@]3(CC[C@@H]2c2c(cc(O)cc2)C1)C	IC50	=	0.00049	uM	F	CELL-LINE	MCF7	606.781
S(OC1C(OC(O[C@@H]2c3c(C[C@](O)(C2)C(=O)C)c(O)c2c(C(=O)c4c(cccc4OC)C2=O)c3O)CC1[NH3+])C)(=O)(=O)[O-]	IC50	=	870	uM	F	CELL-LINE	MCF7	607.589
Clc1cc(ccc1)C[C@H]1NC(=O)\C=C\C[C@H](OC(=O)[C@@H](OC(=O)CCNC1=O)CC(C)C)[C@H](C)[C@H]1O[C@@H]1c1ccccc1	ED50	=	5e-05	uM	F	CELL-LINE	MCF7	611.135
Clc1ccc(cc1)C[C@H]1NC(=O)\C=C\C[C@H](OC(=O)[C@@H](OC(=O)CCNC1=O)CC(C)C)[C@H](C)[C@H]1O[C@@H]1c1ccccc1	ED50	=	0.00012	uM	F	CELL-LINE	MCF7	611.135
P(O[C@@H]1[C@H](O)[C@H](CO)[C@@H](O)[C@H](O)[C@@H]1O)(OC[C@H](OC)COCCCCCCCCCCCCCCCCCC)(=O)[O-]	IC50	=	5	uM	F	CELL-LINE	MCF7	613.746
P(O[C@@H]1[C@H](O)[C@@H](CO)[C@@H](O)[C@H](O)[C@@H]1O)(OC[C@H](OC)COCCCCCCCCCCCCCCCCCC)(=O)[O-]	IC50	=	2	uM	F	CELL-LINE	MCF7	613.746
O(C(OC[C@H](n1ccnc1)COCCCCCCCCCCCCCCCCCC)=O)[C@@H]1[C@@H](O)[C@@H](CO)[C@@H](O)[C@H](O)[C@@H]1O	IC50	=	20	uM	F	CELL-LINE	MCF7	614.821
O=C1c2c3n(-c4c1cccc4)cnc3ccc2NCCC[NH+]1CC[NH+](CC1)CCCN1C(=O)c2cc(N)cc3c2c(ccc3)C1=O	GI50	=	0.032	uM	F	CELL-LINE	MCF7	615.738
O=C(NCCC[NH2+]CC[NH2+]CCCNC(=O)c1c2nc3c(nc2ccc1)cccc3C)c1c2nc3c(nc2ccc1)cccc3C	GI50	=	0.024	uM	F	CELL-LINE	MCF7	616.77
O(C)c1c2nc3c(nc2ccc1)cccc3C(=O)NCCC[NH+](CCCNC(=O)c1c2nc3c(nc2ccc1)cccc3OC)C	GI50	=	0.047	uM	F	CELL-LINE	MCF7	618.718
P(O[C@H]1[C@@H](O)[C@@H](O)[C@H](O)C[C@H]1O)(OC[C@H](n1ccnc1)COCCCCCCCCCCCCCCCCCC)(=O)[O-]	IC50	=	6	uM	F	CELL-LINE	MCF7	619.757
Clc1c2nc3c(nc2ccc1)cccc3C(=O)NCCC[NH+](CCCNC(=O)c1c2nc3c(nc2ccc1)cccc3Cl)C	GI50	=	0.035	uM	F	CELL-LINE	MCF7	627.556
Clc1cc2nc3c(nc2cc1)c(ccc3)C(=O)NCCC[NH+](CCCNC(=O)c1c2nc3c(nc2ccc1)cc(Cl)cc3)C	GI50	=	0.33	uM	F	CELL-LINE	MCF7	627.556
Clc1c2nc3c(nc2ccc1)c(ccc3)C(=O)NCCC[NH+](CCCNC(=O)c1c2nc3c(nc2ccc1)c(Cl)ccc3)C	GI50	=	0.33	uM	F	CELL-LINE	MCF7	627.556
Clc1cc(c2nc3c(nc2c1)cccc3)C(=O)NCCC[NH+](CCCNC(=O)c1cc(Cl)cc2nc3c(nc12)cccc3)C	GI50	=	0.11	uM	F	CELL-LINE	MCF7	627.556
Clc1ccc2nc3c(nc2c1C(=O)NCCC[NH+](CCCNC(=O)c1c2nc4c(nc2ccc1Cl)cccc4)C)cccc3	GI50	=	4.07	uM	F	CELL-LINE	MCF7	627.556
Brc1cc(Cl)cc2c1[C@H](c1ncc(Br)cc1CC2)C1CCN(CC1)C(=O)CC1CCN(CC1)C(=O)N	IC50	=	0.05	uM	F	CELL-LINE	MCF7	638.832
Clc1cc(ccc1OC)C[C@H]1NC(=O)\C=C\CC(OC(=O)[C@H](OC(=O)CCNC1=O)CC(C)C)[C@H](C)C1OC1c1ccccc1	IC50	=	0.28	uM	F	CELL-LINE	MCF7	641.161
Clc1cc(Cl)ccc1\C=C\S(=O)(=O)Cc1ccc(Nc2ncnc3c2cc(OCCC[NH+]2CCOCC2)c(OC)c3)cc1	GI50	=	54	uM	F	CELL-LINE	MCF7	644.6
O=C(NCCC[NH+](CCCNC(=O)c1c2nc3c(nc2ccc1)cccc3N(C)C)C)c1c2nc3c(nc2ccc1)cccc3N(C)C	GI50	=	1.82	uM	F	CELL-LINE	MCF7	644.804
O=C(NCCC[NH2+]CCCC[NH2+]CCCNC(=O)c1c2nc3c(nc2ccc1)cccc3C)c1c2nc3c(nc2ccc1)cccc3C	GI50	=	0.074	uM	F	CELL-LINE	MCF7	644.824
Clc1cc(ccc1Cl)C[C@H]1NC(=O)\C=C\C[C@H](OC(=O)[C@@H](OC(=O)CCNC1=O)CC(C)C)[C@H](C)[C@H]1O[C@@H]1c1ccccc1	ED50	=	8e-05	uM	F	CELL-LINE	MCF7	645.58
O=C1c2c3n(-c4c1cccc4)cnc3ccc2NCCC[NH+]1CC[NH+](CC1)CCCN1C(=O)c2cc([N+](=O)[O-])cc3c2c(ccc3)C1=O	GI50	=	0.0032	uM	F	CELL-LINE	MCF7	645.72
O=C1C=C2NC(=O)/C(=C/C=C\[C@H](OC)[C@@H](OC(=O)N)/C(=C/[C@H](C)[C@@H](O)[C@@H](OC)C[C@@H](CC(=C1NC(OCC(C)C)=O)C2=O)C)/C)/C	IC50	=	0.18	uM	F	CELL-LINE	MCF7	645.75
P(O[C@@H]1[C@H](O)[C@@H](CO)[C@@H](O)[C@H](O)[C@@H]1O)(OC[C@H](n1ccnc1)COCCCCCCCCCCCCCCCCCC)(=O)[O-]	IC50	=	2	uM	F	CELL-LINE	MCF7	649.783
Clc1cc(ccc1OC)C[C@H]1NC(=O)\C=C\C[C@H](OC(=O)[C@@H](OC(=O)[C@@H](CNC1=O)C)CC(C)C)[C@H](C)[C@H]1O[C@@H]1c1ccccc1	ED50	=	9e-06	uM	F	CELL-LINE	MCF7	655.188
O1[C@H]2[C@H](OC1(C)C)[C@H](O)C[NH+](C[C@H]2O)Cc1ccc(OCCCOc2ccc(cc2)C[NH+]2C[C@@H](O)[C@H]3OC(O[C@@H]3[C@H](O)C2)(C)C)cc1	GI50	=	24	uM	F	CELL-LINE	MCF7	660.805
Clc1cc2[nH+]c3c(cc(OC)cc3)c(NCCC[NH+]3CC[NH+](CC3)CCCNc3c4c5n(-c6c(cccc6)C4=O)cnc5cc3)c2cc1	GI50	=	0.4	uM	F	CELL-LINE	MCF7	663.246
S(CC[C@H](NC(=O)c1ccc(N[C@H]2[C@@H]3[C@@H]([C@@H](c4c2cc2OCOc2c4)c2cc(OC)c(O)c(OC)c2)C(OC3)=O)cc1)C(OC)=O)C	ED50	=	9.3	uM	F	CELL-LINE	MCF7	664.732
O1C[C@H]2[C@@H]([C@@H](c3c(cc4OCOc4c3)[C@H]2Nc2ccc(cc2)C(=O)NCC(OCc2ccccc2)=O)c2cc(OC)c(O)c(OC)c2)C1=O	ED50	=	2.3	uM	F	CELL-LINE	MCF7	666.683
O1C[C@H]2[C@@H]([C@@H](c3c(cc4OCOc4c3)[C@H]2Nc2ccc(cc2)C(=O)N[C@@H](Cc2nc[nH]c2)C(OC)=O)c2cc(OC)c(O)c(OC)c2)C1=O	ED50	=	29.8	uM	F	CELL-LINE	MCF7	670.675
O1C[C@H]2[C@@H]([C@@H](c3c(cc4OCOc4c3)[C@H]2Nc2ccc(cc2)C(=O)N[C@@H](Cc2ccccc2)C(OC)=O)c2cc(OC)c(O)c(OC)c2)C1=O	ED50	=	9.6	uM	F	CELL-LINE	MCF7	680.71
O1C[C@H]2[C@@H]([C@@H](c3c(cc4OCOc4c3)[C@H]2Nc2ccc(cc2)C(=O)N[C@@H](C(OCc2ccccc2)=O)C)c2cc(OC)c(O)c(OC)c2)C1=O	ED50	=	2.7	uM	F	CELL-LINE	MCF7	680.71
O1C[C@H]2[C@@H]([C@@H](c3c(cc4OCOc4c3)[C@H]2Nc2ccc(cc2)C(=O)N[C@H](C(OCc2ccccc2)=O)C)c2cc(OC)c(O)c(OC)c2)C1=O	ED50	=	1.6	uM	F	CELL-LINE	MCF7	680.71
O1C[C@H]2[C@@H]([C@@H](c3c(cc4OCOc4c3)[C@H]2NC(=O)[C@@H](NC(OCc2ccccc2)=O)Cc2ccc(O)cc2)c2cc(OC)c(O)c(OC)c2)C1=O	ED50	=	17.4	uM	F	CELL-LINE	MCF7	696.709
P(OCC[C@H]1O[C@@H]2O[C@@]3(OO[C@]24[C@@H](CC[C@H]([C@@H]4CC3)C)[C@H]1C)C)(OCC[C@H]1O[C@@H]2O[C@@]3(OO[C@]24[C@@H](CC[C@H]([C@@H]4CC3)C)[C@H]1C)C)(OC)=O	GI50	=	0.0503	uM	F	CELL-LINE	MCF7	700.803
Oc1cc2CC[C@H]3[C@@H]4CC[C@@](O)(CC(=O)NCCCCCCNC(=O)N5Cc6c(C=C5)c(c5[nH]c7c(c5c6C)cccc7)C)[C@]4(CC[C@@H]3c2cc1)C	GI50	=	3.39	uM	F	CELL-LINE	MCF7	702.94
ClCCN(P(OCCS(=O)(=O)CC(NC(=O)CCC([NH3+])C(=O)[O-])C(=O)NCC(=O)[O-])(=O)N(CCCl)CCCl)CCCl	IC50	=	40.2	uM	F	CELL-LINE	MCF7	710.377
O1C[C@H]2[C@@H]([C@@H](c3c(cc4OCOc4c3)[C@H]2Nc2ccc(cc2)C(=O)N[C@H](Cc2c3c([nH]c2)cccc3)C(OC)=O)c2cc(OC)c(O)c(OC)c2)C1=O	ED50	=	3.6	uM	F	CELL-LINE	MCF7	719.747
O(C(=O)C)c1ccc(cc1)COC(=O)NC1=C2C[C@H](C[C@H](OC)[C@H](O)[C@H](\C=C(/C)\[C@H](OC(=O)N)[C@@H](OC)/C=C\C=C(/C)\C(=O)NC(=CC1=O)C2=O)C)C	IC50	=	0.04	uM	F	CELL-LINE	MCF7	737.803
S(CC(OCCCCCCCCCC)COP(OC[C@H]1O[C@@H](N2C=CC(=NC2=O)N)C(F)(F)[C@@H]1O)(=O)[O-])CCCCCCCCCCCC	IC50	=	1.73	uM	F	CELL-LINE	MCF7	740.911
O(c1c2nc3c(nc2ccc1)cccc3C(=O)NCCC[NH+](CCCNC(=O)c1c2nc3c(nc2ccc1)cccc3Oc1ccccc1)C)c1ccccc1	GI50	=	3.48	uM	F	CELL-LINE	MCF7	742.86
O1[C@@H](C(=O)[O-])[C@@H](O)[C@H](O)[C@H](O)[C@@H]1OC(=O)N[C@@H]1C[C@@H](O[C@@H](C)[C@H]1O)O[C@@H]1c2c(C[C@](O)(C1)C(=O)C)c(O)c1c(C(=O)c3c(cccc3OC)C1=O)c2O	IC50	=	125	uM	F	CELL-LINE	MCF7	746.651
S(=O)(=O)(CCOC(=O)NC1CC(OC(C)C1O)O[C@@]1(c2c(C[C@](C1)(C(=O)C)C)c(O)c1c(C(=O)c3c(cccc3OC)C1=O)c2O)C)c1ccccc1	IC50	=	0.78	uM	F	CELL-LINE	MCF7	751.806
O1[C@@H](CO)[C@@H](O)[C@H](O)[C@H](O)[C@@H]1OCCNC1=C2C[C@H](C[C@H](OC)[C@H](O)C(\C=C(/C)\[C@H](OC(=O)N)C(OC)\C=C/C=C(\C)/C(=O)NC(=CC1=O)C2=O)C)C	IC50	=	0.754	uM	F	CELL-LINE	MCF7	751.827
O1c2c(CCC1(COC(=O)CCC(C)[C@H]1CC[C@H]3[C@H]4[C@H](C[C@H](O)[C@]13C)[C@@]1([C@@H](C[C@H](O)CC1)C[C@H]4O)C)C)c(C)c(OC(=O)[C@@H]([NH3+])CCCC[NH3+])c(C)c2C	IC50	=	4	uM	F	CELL-LINE	MCF7	757.066
P(O[C@H]1[C@@H](O)[C@@H](O)[C@H](O)C[C@H]1O)(OC[C@H](C(=O)CCCCCCCCCCCCCCC)CC(=O)CCCCCCCCCCCCCCC)(=O)[O-]	IC50	=	10	uM	F	CELL-LINE	MCF7	762.039
P(Oc1ccccc1)(OCC[C@H]1O[C@@H]2O[C@@]3(OO[C@]24[C@@H](CC[C@H]([C@@H]4CC3)C)[C@H]1C)C)(OCC[C@H]1O[C@@H]2O[C@@]3(OO[C@]24[C@@H](CC[C@H]([C@@H]4CC3)C)[C@H]1C)C)=O	GI50	=	0.106	uM	F	CELL-LINE	MCF7	762.874
O=C1C=C2NC(=O)/C(=C\C=C/[C@H](OC)[C@@H](OC(=O)N)/C(=C\[C@H](C)[C@@H](O)[C@@H](OC)C[C@@H](CC(=C1NC(=O)c1ccc(cc1)C[NH+](CCC)CCC)C2=O)C)/C)/C	IC50	=	0.5	uM	F	CELL-LINE	MCF7	763.953
O1C[C@H]2[C@@H]([C@@H](c3c(cc4OCOc4c3)[C@H]2Nc2ccc(NC(=O)c3n(cc(NC(=O)c4n(cc([N+](=O)[O-])c4)C)c3)C)cc2)c2cc(OC)c(O)c(OC)c2)C1=O	GI50	=	0.04786	uM	F	CELL-LINE	MCF7	764.748
Clc1nc-2oc1-c1c3c(-c4c5N[C@@H]6Oc7c8[C@@]6(c5ccc4)c4oc(nc-24)[C@@H](NC(=O)[C@@H](NC(=O)[C@@H](O)C(C)C)Cc(c8)cc7)C(C)C)cccc3[nH]c1Cl	IC50	=	0.005	uM	F	CELL-LINE	MCF7	765.654
Clc1nc-2oc1-c1c3c(-c4c5N[C@@H]6Oc7c8[C@@]6(c5ccc4)c4oc(nc-24)[C@@H](NC(=O)[C@@H](NC(=O)[C@H](O)C(C)C)Cc(c8)cc7)C(C)C)cccc3[nH]c1Cl	IC50	=	0.015	uM	F	CELL-LINE	MCF7	765.654
Oc1cc2CCC3C4CC[C@@](O)(CCCOCCOCCOCCOCCC[C@]5(O)CC[C@H]6[C@H]7[C@H](CC[C@]56C)c5c(cc(O)cc5)CC7)[C@]4(CCC3c2cc1)C	IC50	=	62	uM	F	CELL-LINE	MCF7	775.08
O1[C@@H]2CC(O)[C@@]3(C([C@H](Oc4ccccc4)[C@]4(O)C[C@H](OC(=O)[C@H](O)[C@@H](NC(OC(C)(C)C)=O)c5ccccc5)C(=C([C@@H](O)C3=O)C4(C)C)C)[C@]2(OC(=O)C)C1)C	IC50	=	0.001	uM	F	CELL-LINE	MCF7	779.88
O1[C@]23[C@@H](OC1=O)[C@H](OC(=O)[C@H](O)[C@@H](NC(OC(C)(C)C)=O)\C=C/C)C(=C([C@@H](O)C(=O)[C@]1(C([C@@]4(OC(=O)C)C(OC4)C[C@@H]1O)[C@@H]2Oc1ccccc1)C)C3(C)C)C	IC50	=	0.0016	uM	F	CELL-LINE	MCF7	785.84
ClCCN(P(OCCS(=O)(=O)CC(NC(=O)CCC([NH3+])C(=O)[O-])C(=O)NC(C(=O)[O-])c1ccccc1)(=O)N(CCCl)CCCl)CCCl	IC50	=	37.5	uM	F	CELL-LINE	MCF7	786.475
s1ccnc1[C@@H](OC(=O)[C@@H]([C@@H](OC)[C@H]1N(CCC1)C(=O)C[C@@H](OC)[C@@H](N(C(=O)[C@@H](NC(=O)[C@@H]([NH+](C)C)C(C)C)C(C)C)C)[C@H](CC)C)C)Cc1ccccc1	IC50	=	3e-05	uM	F	CELL-LINE	MCF7	787.1
O1C[C@H]2[C@@H]([C@@H](c3c(cc4OCOc4c3)[C@H]2Nc2ccc(NC(=O)[C@H](NC(OCc3ccccc3)=O)Cc3ccc(O)cc3)cc2)c2cc(OC)c(O)c(OC)c2)C1=O	ED50	=	1.9	uM	F	CELL-LINE	MCF7	787.822
O1[C@]23[C@@H](OC1=O)[C@H](OC(=O)[C@H](O)[C@@H](NC(OC(C)(C)C)=O)CCC)C(=C([C@@H](O)C(=O)[C@]1(C([C@@]4(OC(=O)C)C(OC4)C[C@@H]1O)[C@@H]2Oc1ccccc1)C)C3(C)C)C	IC50	=	0.0042	uM	F	CELL-LINE	MCF7	787.856
O1[C@@H]2C[C@H](O)[C@@]3(C([C@H](OC(=O)c4ccccc4)[C@]4(O)C[C@H](OC(=O)[C@H](O)[C@@H](NC(OC(C)(C)C)=O)CC(C)C)C(=C([C@@H](O)C3=O)C4(C)C)C)[C@]2(OC(=O)C)C1)C	IC50	=	0.012	uM	F	CELL-LINE	MCF7	787.9
O1[C@@H](C)[C@](O)(C)[C@@H]([NH3+])CC1OC[C@@]1(c2c(C[C@](O)(C1)/C(=N/NC(=O)CCCCCN1C(=O)C=CC1=O)/CO)c(O)c1c(C(=O)c3c(cccc3OC)C1=O)c2O)C	IC50	=	1	uM	F	CELL-LINE	MCF7	793.847
O1[C@@H](C)[C@](O)(C)[C@@H]([NH3+])CC1OC[C@@]1(c2c(C[C@](O)(C1)/C(=N/NC(=O)CCCCCN1C(=O)CCC1=O)/CO)c(O)c1c(C(=O)c3c(cccc3OC)C1=O)c2O)C	IC50	=	1.1	uM	F	CELL-LINE	MCF7	795.863
O=C1C=C2NC(=O)/C(=C\C=C/[C@H](OC)[C@@H](OC(=O)N)/C(=C\[C@H](C)[C@@H](O)[C@@H](OC)C[C@@H](CC(=C1NC(=O)c1ccc(cc1)C[NH+](Cc1ccccc1)CC)C2=O)C)/C)/C	IC50	=	0.2	uM	F	CELL-LINE	MCF7	797.97
FC(F)(F)[C@H](NC(OC(C)(C)C)=O)[C@@H](O)C(O[C@H]1C[C@@]2(O)[C@@H](OC(=O)c3ccccc3)[C@H]3[C@@](C)([C@@H](O)C[C@H]4OC[C@@]34OC(=O)C)C(=O)[C@H](O)C(C2(C)C)=C1C)=O	IC50	=	0.00044	uM	F	CELL-LINE	MCF7	799.789
O1[C@]23[C@@H](OC1=O)[C@H](OC(=O)[C@H](O)[C@@H](NC(OC(C)(C)C)=O)\C=C(\C)/C)C(=C([C@@H](O)C(=O)[C@]1(C([C@@]4(OC(=O)C)C(OC4)C[C@@H]1O)[C@@H]2Oc1ccccc1)C)C3(C)C)C	IC50	=	0.0005	uM	F	CELL-LINE	MCF7	799.867
O1[C@@H]2C[C@H](O)[C@@]3([C@H]([C@H](OC(=O)c4ccccc4)[C@]4(O)C[C@H](OC(=O)[C@H](O)[C@@H](NC(OC(C)(C)C)=O)\C=C(\C)/C)C(=C([C@@H](OC)C3=O)C4(C)C)C)[C@]2(OC(=O)C)C1)C	IC50	=	0.00037	uM	F	CELL-LINE	MCF7	799.911
O1[C@]23[C@@H](OC1=O)[C@H](OC(=O)[C@H](O)[C@@H](NC(OC(C)(C)C)=O)CC(C)C)C(=C([C@@H](O)C(=O)[C@]1(C([C@@]4(OC(=O)C)C(OC4)C[C@@H]1O)[C@@H]2Oc1ccccc1)C)C3(C)C)C	IC50	=	0.0027	uM	F	CELL-LINE	MCF7	801.883
O1[C@@H]2C[C@H](O)[C@@]3([C@H]([C@H](OC(=O)c4ccccc4)[C@]4(O)C[C@H](OC(=O)[C@H](O)[C@@H](NC(OC(C)(C)C)=O)CC(C)C)C(=C([C@@H](OC)C3=O)C4(C)C)C)[C@]2(OC(=O)C)C1)C	IC50	=	0.00033	uM	F	CELL-LINE	MCF7	801.927
O1C2CC(O)C3(C(C(OC(=O)\C=C(\C)/C)C4(O)CC(OC(=O)C(O)C(NC(OC(C)(C)C)=O)\C=C(\C)/C)C(=C(C4(C)C)C(OC(=O)C)C3=O)C)C2(OC(=O)C)C1)C	IC50	=	0.0005	uM	F	CELL-LINE	MCF7	805.915
O1[C@@H]2C[C@H](O)[C@@]3([C@H]([C@H](OC(=O)c4ccccc4)[C@]4(O)C[C@H](OC(=O)[C@H](O)[C@@H](NC(OC(C)(C)C)=O)c5ccccc5)C(=C([C@@H](O)C3=O)C4(C)C)C)[C@]2(OC(=O)C)C1)C	IC50	=	4.2	uM	F	CELL-LINE	MCF7	807.89
O1C2CC(O)C3(C(C(OC(=O)\C=C(\C)/C)C4(O)CC(OC(=O)C(O)C(NC(OC(C)(C)C)=O)CC(C)C)C(=C(C4(C)C)C(OC(=O)C)C3=O)C)C2(OC(=O)C)C1)C	IC50	=	0.084	uM	F	CELL-LINE	MCF7	807.931
O1C2CC(O)C3(C(C(OC(=O)CC(C)C)C4(O)CC(OC(=O)C(O)C(NC(OC(C)(C)C)=O)\C=C(\C)/C)C(=C(C4(C)C)C(OC(=O)C)C3=O)C)C2(OC(=O)C)C1)C	IC50	=	0.011	uM	F	CELL-LINE	MCF7	807.931
O[C@@H]1CC2C(C3CC[C@H]([C@@H](CCC(=O)NCCNC(=O)CC[C@H](C)[C@H]4CCC5C6C(C[C@@H](O)[C@]45C)[C@@]4(C(C[C@H](O)CC4)CC6)C)C)[C@@]13C)CCC1C[C@H](O)CC[C@@]12C	IC50	=	2.2	uM	F	CELL-LINE	MCF7	809.23
O1C2CC(O)C3(C(C(OC(=O)CC(C)C)C4(O)CC(OC(=O)C(O)C(NC(OC(C)(C)C)=O)CC(C)C)C(=C(C4(C)C)C(OC(=O)C)C3=O)C)C2(OC(=O)C)C1)C	IC50	=	0.043	uM	F	CELL-LINE	MCF7	809.947
s1ccnc1C(NC(=O)[C@@H]([C@@H](OC)[C@H]1N(CCC1)C(=O)[C@H]1N(CCC1)C(=O)[C@@H](N(C(=O)[C@@H](NC(=O)[C@@H]([NH+](C)C)C(C)C)C(C)C)C)C(C)C)C)Cc1ccccc1	IC50	=	0.00248	uM	F	CELL-LINE	MCF7	811.126
O1[C@]23[C@@H](OC1=O)[C@H](OC(=O)[C@H](O)[C@@H](NC(OC(C)(C)C)=O)c1occc1)C(=C([C@@H](O)C(=O)[C@]1(C([C@@]4(OC(=O)C)C(OC4)C[C@@H]1O)[C@@H]2Oc1ccccc1)C)C3(C)C)C	IC50	=	0.0005	uM	F	CELL-LINE	MCF7	811.834
O(C)c1cc2N([C@@H]3[C@@]4([C@H]5[NH+](CC=C[C@@]5(CC)[C@@H](OC(=O)C)[C@]3(O)C(OC)=O)CC4)c2cc1[C@@]1(c2[nH]c3c(c2CC[NH+]2C[C@@](O)(C[C@@H](C1)C2)CC)cccc3)C(OC)=O)C	GI50	=	0.0023	uM	F	CELL-LINE	MCF7	813.005
O(C)C1=CC(=O)N(C(=O)[C@@H](OC(=O)[C@H]2N(CCC2)C(=O)C[C@@H](OC)[C@@H](N(C(=O)[C@@H](NC(=O)[C@@H]([NH+](C)C)C(C)C)C(C)C)C)[C@H](CC)C)C(C)C)[C@H]1Cc1ccccc1	IC50	=	0.00019	uM	F	CELL-LINE	MCF7	813.07
O1[C@@H]2C[C@H](O)[C@@]3(C([C@H](OC(=O)c4ccccc4)[C@]4(O)C[C@H](OC(=O)[C@H](O)[C@@H](NC(OC(C)(C)C)=O)\C=C\C)C(=C([C@@H](OC(=O)C)C3=O)C4(C)C)C)[C@]2(OC(=O)C)C1)C	IC50	=	0.014	uM	F	CELL-LINE	MCF7	813.894
O1[C@]23[C@@H](OC1=O)[C@H](OC(=O)[C@H](O)[C@@H](NC(OC(C)(C)C)=O)CC(C)(C)C)C(=C([C@@H](O)C(=O)[C@]1(C([C@@]4(OC(=O)C)C(OC4)C[C@@H]1O)[C@@H]2Oc1ccccc1)C)C3(C)C)C	IC50	=	0.048	uM	F	CELL-LINE	MCF7	815.91
S1C[C@@H]2NC(=O)N[C@@H]2C1CCCCC(=O)NCCCCCCNC(=O)[C@]12C(C3[C@](CC1)(C)[C@]1(C(=CC3=O)[C@@]3([C@@H](CC1)C(C)(C)C(=O)C(=C3)C#N)C)C)CC(CC2)(C)C	IC50	=	3.31	uM	F	CELL-LINE	MCF7	816.165
O1CC(O)C(O)C(OC(=O)c2ccc(OC)cc2)C1OC1C(OC(=O)C)C(OCC1O)O[C@H]1CC2C3C(CC([C@@H](C(=O)C)C)[C@]2(C)[C@@H]1O)[C@@]1(C(C[C@@H](O)CC1)=CC3)C	IC50	=	6.61	uM	F	CELL-LINE	MCF7	816.938
Oc1cc2CC[C@H]3[C@@H]4CC[C@@](O)(CCCOCCOCCOCCOCCOCCC[C@]5(O)CC[C@H]6[C@H]7[C@H](CC[C@]56C)c5c(cc(O)cc5)CC7)[C@]4(CC[C@@H]3c2cc1)C	IC50	=	63	uM	F	CELL-LINE	MCF7	819.133
O1[C@]23[C@@H](OC1=O)[C@H](OC(=O)[C@H](O)[C@@H](NC(=O)CCCCC)c1ccccc1)C(=C([C@@H](O)C(=O)[C@]1(C([C@@]4(OC(=O)C)C(OC4)C[C@@H]1O)[C@@H]2Oc1ccccc1)C)C3(C)C)C	IC50	=	0.013	uM	F	CELL-LINE	MCF7	819.901
O1[C@@H]2C[C@H](O)[C@@]3([C@H]([C@H](OC(=O)c4ccccc4)[C@]4(O)CC(OC(=O)[C@@]5(O)Cc6c(cccc6)[C@@H]5NC(OC(C)(C)C)=O)C(=C([C@@H](O)C3=O)C4(C)C)C)[C@]2(OC(=O)C)C1)C	ED50	=	0.002	uM	F	CELL-LINE	MCF7	819.901
O1C2CC(O)C3(C(C(OC(=O)C4CCCCC4)C4(O)CC(OC(=O)C(O)C(NC(OC(C)(C)C)=O)\C=C\C)C(=C(C4(C)C)C(OC(=O)C)C3=O)C)C2(OC(=O)C)C1)C	IC50	=	0.0032	uM	F	CELL-LINE	MCF7	819.942
O1[C@]23[C@@H](OC1=O)[C@H](OC(=O)[C@H](O)[C@@H](NC(OC(C)(C)C)=O)c1ccccc1)C(=C([C@@H](O)C(=O)[C@]1(C([C@@]4(OC(=O)C)C(OC4)C[C@@H]1O)[C@@H]2Oc1ccccc1)C)C3(C)C)C	IC50	=	0.0018	uM	F	CELL-LINE	MCF7	821.873
O1[C@@H]2C[C@H](O)[C@@]3(C([C@H](OC(=O)c4ccccc4)[C@]4(O)[C@@H](O)[C@H](OC(=O)[C@H](O)[C@@H](NC(OC(C)(C)C)=O)c5ccccc5)C(=C([C@@H](O)C3=O)C4(C)C)C)[C@]2(OC(=O)C)C1)C	IC50	=	0.0019	uM	F	CELL-LINE	MCF7	823.889
O1[C@@H]2C[C@H](O)[C@@]3(C([C@H](OC(=O)c4ccccc4)[C@]4(O)[C@@H](OC(=O)[C@@H](O)C(NC(OC(C)(C)C)=O)c5ccccc5)[C@H](O)C(=C([C@@H](O)C3=O)C4(C)C)C)[C@]2(OC(=O)C)C1)C	IC50	=	0.026	uM	F	CELL-LINE	MCF7	823.889
O1[C@]23[C@@H](OC1=O)[C@H](OC(=O)[C@H](O)[C@@H](NC(=O)c1ccccc1)c1ccccc1)C(=C([C@@H](O)C(=O)[C@]1(C([C@@]4(OC(=O)C)C(OC4)C[C@@H]1O)[C@@H]2Oc1ccccc1)C)C3(C)C)C	IC50	=	0.011	uM	F	CELL-LINE	MCF7	825.864
O1[C@@H]2CC(O)[C@@]3(C([C@H](Oc4ccccc4)[C@]4(O)C[C@H](OC(=O)[C@H](O)[C@@H](NC(=O)c5ccccc5)c5ccccc5)C(=C([C@@H](OC(=O)C)C3=O)C4(C)C)C)[C@]2(OC(=O)C)C1)C	IC50	=	0.0017	uM	F	CELL-LINE	MCF7	825.908
O(C)c1cc2N([C@@H]3[C@@]4([C@H]5[NH+](CC=C[C@@]5(CC)[C@@H](OC(=O)C)[C@]3(O)C(OC)=O)CC4)c2cc1[C@@]1(c2[nH]c3c(c2CC[NH+]2C[C@@](O)(C[C@H](C1)C2)CC)cccc3)C(OC)=O)C=O	IC50	=	0.00084	uM	F	CELL-LINE	MCF7	826.988
O1[C@]23[C@@H](OC1=O)[C@H](OC(=O)[C@H](O)[C@@H](NC(OC(C)(C)C)=O)\C=C/C)C(=C([C@@H](OC(=O)C)C(=O)[C@]1(C([C@@]4(OC(=O)C)C(OC4)C[C@@H]1O)[C@@H]2Oc1ccccc1)C)C3(C)C)C	IC50	=	0.0016	uM	F	CELL-LINE	MCF7	827.877
O1[C@@H]2C[C@H](O)[C@@]3(C([C@H](OC(=O)c4ccccc4)[C@]4(O)[C@@H](OC(=O)[C@@H](O)C(NC(=O)c5ccccc5)c5ccccc5)[C@H](O)C(=C([C@@H](O)C3=O)C4(C)C)C)[C@]2(OC(=O)C)C1)C	IC50	=	0.269	uM	F	CELL-LINE	MCF7	827.88
O1[C@@H]2C[C@H](O)[C@@]3([C@H]([C@H](OC(=O)c4ccccc4)[C@]4(O)C[C@H](OC(=O)[C@H](O)[C@@H](NC(OC(C)(C)C)=O)\C=C(\C)/C)C(=C([C@@H](OC(=O)C)C3=O)C4(C)C)C)[C@]2(OC(=O)C)C1)C	IC50	=	0.012	uM	F	CELL-LINE	MCF7	827.921
O1C2CC(O)C3(C(C(OC(=O)\C=C(\C)/C)C4(O)CC(OC(=O)C(O)C(NC(OC(C)(C)C)=O)c5ccccc5)C(=C(C4(C)C)C(OC(=O)C)C3=O)C)C2(OC(=O)C)C1)C	IC50	=	0.0011	uM	F	CELL-LINE	MCF7	827.921
O1[C@]23[C@@H](OC1=O)[C@H](OC(=O)[C@H](O)[C@@H](NC(OC(C)(C)C)=O)CCC)C(=C([C@@H](OC(=O)C)C(=O)[C@]1(C([C@@]4(OC(=O)C)C(OC4)C[C@@H]1O)[C@@H]2Oc1ccccc1)C)C3(C)C)C	IC50	=	0.0046	uM	F	CELL-LINE	MCF7	829.893
O1[C@@H]2C[C@H](O)[C@@]3(C([C@H](OC(=O)c4ccccc4)[C@]4(O)C[C@H](OC(=O)[C@H](O)[C@@H](NC(OC(C)(C)C)=O)CC(C)C)C(=C([C@@H](OC(=O)C)C3=O)C4(C)C)C)[C@]2(OC(=O)C)C1)C	IC50	=	0.036	uM	F	CELL-LINE	MCF7	829.937
O1[C@@H]2C[C@H](O)[C@@]3([C@H]([C@H](OC(=O)c4ccccc4)[C@]4(O)C[C@H](OC(=O)[C@H](O)[C@@H](NC(OC(C)(C)C)=O)CC(C)C)C(=C([C@@H](OC(=O)C)C3=O)C4(C)C)C)[C@]2(OC(=O)C)C1)C	IC50	=	0.004	uM	F	CELL-LINE	MCF7	829.937
O1[C@@H]2C[C@H](O)[C@@]3(C([C@H](OC(=O)c4ccccc4)[C@]4(O)C[C@H](OC(=O)[C@H](O)[C@@H](NC(=O)c5ccccc5)\C=C(\C)/C)C(=C([C@@H](OC(=O)C)C3=O)C4(C)C)C)[C@]2(OC(=O)C)C1)C	IC50	=	0.113	uM	F	CELL-LINE	MCF7	831.912
O=C1C=C2NC(=O)/C(=C/C=C\[C@H](OC)[C@@H](OC(=O)N)/C(=C/[C@H](C)[C@@H](O)[C@@H](OC)C[C@@H](CC(=C1NC(=O)c1ccc(cc1)C[NH+]1CC[NH+](CC1)C1CCCCC1)C2=O)C)/C)/C	IC50	=	0.2	uM	F	CELL-LINE	MCF7	832.052
O1[C@@H]2C[C@H](O)[C@@]3([C@H]([C@H](OC(=O)c4ccccc4)[C@]4(O)CC(OC(=O)[C@@]5(O)CCc6c(cccc6)[C@@H]5NC(OC(C)(C)C)=O)C(=C([C@@H](O)C3=O)C4(C)C)C)[C@]2(OC(=O)C)C1)C	ED50	=	0.239	uM	F	CELL-LINE	MCF7	833.928
O1C2CC(O)C3(C(C(OC(=O)C4CCCCC4)C4(O)CC(OC(=O)C(O)C(NC(OC(C)(C)C)=O)\C=C(\C)/C)C(=C(C4(C)C)C(OC(=O)C)C3=O)C)C2(OC(=O)C)C1)C	IC50	=	0.0005	uM	F	CELL-LINE	MCF7	833.969
O1C2CC(O)C3(C(C(OC(=O)C4CCCCC4)C4(O)CC(OC(=O)C(O)C(NC(OC(C)(C)C)=O)CC(C)C)C(=C(C4(C)C)C(OC(=O)C)C3=O)C)C2(OC(=O)C)C1)C	IC50	=	0.0018	uM	F	CELL-LINE	MCF7	835.985
O(C)C1=CC(=O)N(C(=O)[C@@H](OC(=O)[C@H]2N(CCC2)C(=O)[C@H]2N(CCC2)C(=O)[C@@H](N(C(=O)[C@@H](NC(=O)[C@@H]([NH+](C)C)C(C)C)C(C)C)C)C(C)C)C(C)C)[C@H]1Cc1ccccc1	IC50	=	4e-05	uM	F	CELL-LINE	MCF7	838.08
FC(F)(F)[C@H](NC(OC(C)(C)C)=O)[C@@H](O)C(O[C@H]1C[C@@]2(O)[C@@H](OC(=O)c3ccccc3)[C@H]3[C@@](C)([C@@H](O)C[C@H]4OC[C@@]34OC(=O)C)C(=O)[C@H](OC(=O)C)C(C2(C)C)=C1C)=O	IC50	=	0.0006	uM	F	CELL-LINE	MCF7	841.826
O1[C@]23[C@@H](OC1=O)[C@H](OC(=O)[C@H](O)[C@@H](NC(OC(C)(C)C)=O)\C=C(\C)/C)C(=C([C@@H](OC(=O)C)C(=O)[C@]1(C([C@@]4(OC(=O)C)C(OC4)C[C@@H]1O)[C@@H]2Oc1ccccc1)C)C3(C)C)C	IC50	=	0.0033	uM	F	CELL-LINE	MCF7	841.904
O1[C@@H]2C[C@H](O)[C@@]3(C([C@H](OC(=O)c4cc(ccc4)C)[C@]4(O)C[C@H](OC(=O)[C@H](O)[C@@H](NC(OC(C)(C)C)=O)\C=C(\C)/C)C(=C([C@@H](OC(=O)C)C3=O)C4(C)C)C)[C@]2(OC(=O)C)C1)C	IC50	=	0.0008	uM	F	CELL-LINE	MCF7	841.948
O1[C@@H]2C[C@H](O)[C@@]3([C@H]([C@H](OC(=O)c4ccccc4)[C@]4(O)C[C@H](OC(=O)[C@H](O)[C@@H](NC(OC(C)(C)C)=O)\C=C(\C)/C)C(=C([C@@H](OC(=O)CC)C3=O)C4(C)C)C)[C@]2(OC(=O)C)C1)C	IC50	=	0.00018	uM	F	CELL-LINE	MCF7	841.948
O1[C@@H]2C[C@H](O)[C@@]3([C@H]([C@H](OC(=O)c4ccccc4)[C@]4(O)C[C@H](OC(=O)[C@H](O)[C@@H](NC(OC(C)(C)C)=O)\C=C(\C)/C)C(=C([C@@H](OC(=O)NC)C3=O)C4(C)C)C)[C@]2(OC(=O)C)C1)C	IC50	=	0.0004	uM	F	CELL-LINE	MCF7	842.936
O1[C@]23[C@@H](OC1=O)[C@H](OC(=O)[C@H](O)[C@@H](NC(OC(C)(C)C)=O)CC(C)C)C(=C([C@@H](OC(=O)C)C(=O)[C@]1(C([C@@]4(OC(=O)C)C(OC4)C[C@@H]1O)[C@@H]2Oc1ccccc1)C)C3(C)C)C	IC50	=	0.0011	uM	F	CELL-LINE	MCF7	843.92
O1[C@@H]2C[C@H](O)[C@@]3([C@H]([C@H](OC(=O)c4ccccc4)[C@]4(O)C[C@H](OC(=O)[C@H](O)[C@@H](NC(OC(C)(C)C)=O)\C=C(\C)/C)C(=C([C@@H](OC(OC)=O)C3=O)C4(C)C)C)[C@]2(OC(=O)C)C1)C	IC50	=	0.00014	uM	F	CELL-LINE	MCF7	843.92
O1[C@@H]2C[C@H](O)[C@@]3([C@H]([C@H](OC(=O)c4ccccc4)[C@]4(O)C[C@H](OC(=O)[C@H](O)[C@@H](NC(OC(C)(C)C)=O)CC(C)C)C(=C([C@@H](OC(=O)CC)C3=O)C4(C)C)C)[C@]2(OC(=O)C)C1)C	IC50	=	0.00035	uM	F	CELL-LINE	MCF7	843.964
O1CC(O)C(O)C(OC(=O)c2ccc(OC)cc2)C1OC1C(OC(=O)C)C(OCC1O)O[C@H]1CC2C3C(CC([C@@H](C(=O)CCC)C)[C@]2(C)[C@@H]1O)[C@@]1(C(C[C@@H](O)CC1)=CC3)C	IC50	=	0.02	uM	F	CELL-LINE	MCF7	844.992
O1[C@@H]2C[C@H](O)[C@@]3([C@H]([C@H](OC(=O)c4ccccc4)[C@]4(O)C[C@H](OC(=O)[C@H](O)[C@@H](NC(OC(C)(C)C)=O)CC(C)C)C(=C([C@@H](OC(OC)=O)C3=O)C4(C)C)C)[C@]2(OC(=O)C)C1)C	IC50	=	0.00028	uM	F	CELL-LINE	MCF7	845.936
O1[C@]23[C@@H](OC1=O)[C@H](OC(=O)[C@H](O)[C@@H](NC(OC(C)(C)C)=O)c1ccccc1)C(=C([C@@H](O)C(=O)[C@]1(C([C@@]4(OC(=O)C)[C@H](OC4)C[C@@H]1O)[C@@H]2OC(=O)c1ccccc1)C)C3(C)C)C	IC50	=	0.0018	uM	F	CELL-LINE	MCF7	849.883
O1[C@]23[C@@H](OC1=O)[C@H](OC(=O)[C@H](O)[C@@H](NC(OC(C)(C)C)=O)c1occc1)C(=C([C@@H](OC(=O)C)C(=O)[C@]1(C([C@@]4(OC(=O)C)C(OC4)C[C@@H]1O)[C@@H]2Oc1ccccc1)C)C3(C)C)C	IC50	=	0.0005	uM	F	CELL-LINE	MCF7	853.871
O1[C@]23[C@@H](OC1=O)[C@H](OC(=O)[C@H](O)[C@@H](NC(=O)c1ccccc1)c1ccccc1)C(=C([C@@H](O)C(=O)[C@]1(C([C@@]4(OC(=O)C)[C@H](OC4)C[C@@H]1O)[C@@H]2OC(=O)c1ccccc1)C)C3(C)C)C	IC50	=	0.011	uM	F	CELL-LINE	MCF7	853.874
O1[C@@H]2C[C@H](O)[C@@]3([C@H]([C@H](OC(=O)c4ccccc4)[C@]4(O)C[C@H](OC(=O)[C@H](O)[C@@H](NC(=O)c5ccccc5)c5ccccc5)C(=C([C@@H](OC(=O)C)C3=O)C4(C)C)C)[C@]2(OC(=O)C)C1)C	IC50	=	0.0055	uM	F	CELL-LINE	MCF7	853.918
O1[C@@H]2C[C@H](O)[C@@]3([C@H]([C@H](OC(=O)c4ccccc4)[C@]4(O)C[C@H](OC(=O)[C@H](O)[C@@H](NC(OC(C)(C)C)=O)\C=C(\C)/C)C(=C([C@@H](OC(=O)\C=C\C)C3=O)C4(C)C)C)[C@]2(OC(=O)C)C1)C	IC50	=	0.00026	uM	F	CELL-LINE	MCF7	853.959
O1[C@@H]2C[C@H](O)[C@@]3(C([C@H](OC(=O)c4ccccc4)[C@]4(O)C[C@H](OC(=O)[C@H](O)[C@@H](NC(OC(C)(C)C)=O)\C=C(\C)/C)C(=C([C@@H](OC(=O)C5CC5)C3=O)C4(C)C)C)[C@]2(OC(=O)C)C1)C	IC50	=	0.0002	uM	F	CELL-LINE	MCF7	853.959
FC(F)(F)[C@H](NC(OC(C)(C)C)=O)[C@@H](O)C(O[C@H]1C[C@@]2(O)[C@@H](OC(=O)c3ccccc3)[C@H]3[C@@](C)([C@@H](O)C[C@H]4OC[C@@]34OC(=O)C)C(=O)[C@H](OC(=O)CC)C(C2(C)C)=C1C)=O	IC50	=	0.0003	uM	F	CELL-LINE	MCF7	855.853
O1[C@]23[C@@H](OC1=O)[C@H](OC(=O)[C@H](O)[C@@H](NC(OC(C)(C)C)=O)\C=C(\C)/C)C(=C([C@@H](OC(=O)CC)C(=O)[C@]1(C([C@@]4(OC(=O)C)C(OC4)C[C@@H]1O)[C@@H]2Oc1ccccc1)C)C3(C)C)C	IC50	=	0.0002	uM	F	CELL-LINE	MCF7	855.931
O1[C@@H]2C[C@H](O)[C@@]3([C@H]([C@H](OC(=O)c4cc(OC)ccc4OC)[C@]4(O)C[C@H](OC(=O)[C@H](O)[C@@H](NC(=O)\C=C\C)\C=C(\C)/C)C(=C([C@@H](OC(=O)C)C3=O)C4(C)C)C)[C@]2(OC(=O)C)C1)C	IC50	=	0.01	uM	F	CELL-LINE	MCF7	855.931
O1C2CC(O)C3(C(C(OC(=O)C4CCCCC4)C4(O)CC(OC(=O)C(O)C(NC(OC(C)(C)C)=O)c5ccccc5)C(=C(C4(C)C)C(OC(=O)C)C3=O)C)C2(OC(=O)C)C1)C	IC50	=	0.0018	uM	F	CELL-LINE	MCF7	855.975
O1[C@@H]2C[C@H](O)[C@@]3([C@H]([C@H](OC(=O)c4ccccc4)[C@]4(O)C[C@H](OC(=O)[C@H](O)[C@@H](NC(OC(C)(C)C)=O)CC(C)C)C(=C([C@@H](OC(=O)C5CC5)C3=O)C4(C)C)C)[C@]2(OC(=O)C)C1)C	IC50	=	0.00051	uM	F	CELL-LINE	MCF7	855.975
O1[C@@H]2C[C@H](O)[C@@]3([C@H]([C@H](OC(=O)c4ccccc4)[C@]4(O)C[C@H](OC(=O)[C@H](O)[C@@H](NC(OC(C)(C)C)=O)\C=C(\C)/C)C(=C([C@@H](OC(=O)NCC)C3=O)C4(C)C)C)[C@]2(OC(=O)C)C1)C	IC50	=	0.00031	uM	F	CELL-LINE	MCF7	856.963
O1[C@@H]2C[C@H](O)[C@@]3([C@H]([C@H](OC(=O)c4ccccc4)[C@]4(O)C[C@H](OC(=O)[C@H](O)[C@@H](NC(OC(C)(C)C)=O)\C=C(\C)/C)C(=C([C@@H](OC(=O)N(C)C)C3=O)C4(C)C)C)[C@]2(OC(=O)C)C1)C	IC50	=	0.00013	uM	F	CELL-LINE	MCF7	856.963
FC(F)(F)[C@H](NC(OC(C)(C)C)=O)[C@@H](O)C(O[C@H]1C[C@@]2(O)[C@@H](OC(=O)c3ccccc3)[C@H]3[C@@](C)([C@@H](O)C[C@H]4OC[C@@]34OC(=O)C)C(=O)[C@H](OC(OC)=O)C(C2(C)C)=C1C)=O	IC50	=	0.0004	uM	F	CELL-LINE	MCF7	857.825
O1[C@]23[C@@H](OC1=O)[C@H](OC(=O)[C@H](O)[C@@H](NC(OC(C)(C)C)=O)\C=C(\C)/C)C(=C([C@@H](OC(OC)=O)C(=O)[C@]1(C([C@@]4(OC(=O)C)C(OC4)C[C@@H]1O)[C@@H]2Oc1ccccc1)C)C3(C)C)C	IC50	=	0.0003	uM	F	CELL-LINE	MCF7	857.903
O1[C@@H]2C[C@H](O)[C@@]3(C([C@H](OC(=O)c4cc(OC)ccc4)[C@]4(O)C[C@H](OC(=O)[C@H](O)[C@@H](NC(OC(C)(C)C)=O)\C=C(\C)/C)C(=C([C@@H](OC(=O)C)C3=O)C4(C)C)C)[C@]2(OC(=O)C)C1)C	IC50	=	0.0008	uM	F	CELL-LINE	MCF7	857.947
O1[C@@H]2C[C@H](O)[C@@]3(C([C@H](OC(=O)c4cc(OC)ccc4)[C@]4(O)C[C@H](OC(=O)[C@H](O)[C@@H](NC(OC(C)(C)C)=O)CC=C)C(=C([C@@H](OC(=O)CC)C3=O)C4(C)C)C)[C@]2(OC(=O)C)C1)C	IC50	=	0.0008	uM	F	CELL-LINE	MCF7	857.947
O1[C@@H]2C[C@H](O)[C@@]3([C@H]([C@H](OC(=O)c4cc(OC)ccc4)[C@]4(O)C[C@H](OC(=O)[C@H](O)[C@@H](NC(OC(C)(C)C)=O)\C=C(\C)/C)C(=C([C@@H](OC(=O)C)C3=O)C4(C)C)C)[C@]2(OC(=O)C)C1)C	IC50	=	2e-05	uM	F	CELL-LINE	MCF7	857.947
O1[C@@H]2C[C@H](O)[C@@]3([C@H]([C@H](OC(=O)c4ccccc4)[C@]4(O)C[C@H](OC(=O)[C@H](O)[C@@H](NC(OC(C)(C)C)=O)CC(C)C)C(=C([C@@H](OC(=O)N(C)C)C3=O)C4(C)C)C)[C@]2(OC(=O)C)C1)C	IC50	=	0.00036	uM	F	CELL-LINE	MCF7	858.979
O1CC(O)C(O)C(OC(=O)c2ccc(OC)cc2)C1OC1C(OC(=O)C)C(OCC1O)O[C@H]1CC2C3C(CC([C@@H](CCCC(C)C)C)[C@]2(C)[C@@H]1O)[C@@]1(C(C[C@@H](O)CC1)=CC3)C	IC50	=	0.06	uM	F	CELL-LINE	MCF7	859.063
Clc1ccc(N2CC[NH+](CC2)Cc2ccc(cc2)C(=O)NC2=C3C[C@H](C[C@H](OC)[C@H](O)[C@H](\C=C(/C)\[C@H](OC(=O)N)[C@@H](OC)/C=C\C=C(/C)\C(=O)NC(=CC2=O)C3=O)C)C)cc1	IC50	=	0.15	uM	F	CELL-LINE	MCF7	859.441
S1C[C@@H]2NC(=O)N[C@@H]2[C@@H]1CCCCC(=O)NCCCCCC(OC[C@]1([C@@H]2CC[C@@]3(C(=CC(=O)C4C5CC(CC[C@@]5(CC[C@@]34C)C(OC)=O)(C)C)[C@]2(C=C(C#N)C1=O)C)C)C)=O	IC50	=	0.55	uM	F	CELL-LINE	MCF7	861.158
O1C2CC(O)C3(C(C(OC(=O)C4CCCCC4)C4(O)CC(OC(=O)C(O)C(NC(OC(C)(C)C)=O)C5CCCCC5)C(=C(C4(C)C)C(OC(=O)C)C3=O)C)C2(OC(=O)C)C1)C	IC50	=	0.01	uM	F	CELL-LINE	MCF7	862.023
Clc1cc(ccc1)C(O[C@H]1[C@H]2[C@@](C)([C@@H](O)C[C@H]3OC[C@@]23OC(=O)C)C(=O)[C@H](OC(=O)C)C=2C(C)(C)[C@@]1(O)C[C@H](OC(=O)[C@H](O)[C@@H](NC(OC(C)(C)C)=O)\C=C(\C)/C)C=2C)=O	IC50	=	2e-05	uM	F	CELL-LINE	MCF7	862.366
Fc1cc(cc(F)c1)C(O[C@H]1[C@H]2[C@@](C)([C@@H](O)C[C@H]3OC[C@@]23OC(=O)C)C(=O)[C@H](OC(=O)C)C=2C(C)(C)[C@@]1(O)C[C@H](OC(=O)[C@H](O)[C@@H](NC(OC(C)(C)C)=O)\C=C(\C)/C)C=2C)=O	IC50	=	4e-05	uM	F	CELL-LINE	MCF7	863.901
O1[C@]23[C@@H](OC1(C)C)[C@H](OC(=O)[C@H](O)[C@@H](NC(OC(C)(C)C)=O)c1ccccc1)C(=C([C@@H](O)C(=O)[C@]1(C([C@@]4(OC(=O)C)[C@H](OC4)C[C@@H]1O)[C@@H]2OC(=O)c1ccccc1)C)C3(C)C)C	IC50	=	0.034	uM	F	CELL-LINE	MCF7	863.954
O1[C@@H]2C[C@H](O)[C@@]3([C@H]([C@H](OC(=O)c4ccccc4)[C@]4(O)CC(OC(=O)[C@]5(O)Cc6c(cccc6)[C@@H]5NC(=O)c5ccccc5)C(=C([C@@H](OC(=O)C)C3=O)C4(C)C)C)[C@]2(OC(=O)C)C1)C	ED50	=	1.604	uM	F	CELL-LINE	MCF7	865.929
O1[C@@H]2C[C@H](O)[C@@]3([C@H]([C@H](OC(=O)c4ccccc4)[C@]4(O)CC(OC(=O)[C@@]5(O)Cc6c(cccc6)[C@@H]5NC(=O)c5ccccc5)C(=C([C@@H](OC(=O)C)C3=O)C4(C)C)C)[C@]2(OC(=O)C)C1)C	ED50	=	0.009	uM	F	CELL-LINE	MCF7	865.929
O1[C@]23[C@@H](OC1=O)[C@H](OC(=O)[C@H](O)[C@@H](NC(=O)CCCCC)\C=C(\C)/C)C(=C([C@@H](OC(=O)C1CC1)C(=O)[C@]1(C([C@@]4(OC(=O)C)C(OC4)C[C@@H]1O)[C@@H]2Oc1ccccc1)C)C3(C)C)C	IC50	=	0.0032	uM	F	CELL-LINE	MCF7	865.97
O1[C@]23[C@@H](OC1=O)[C@H](OC(=O)[C@H](O)[C@@H](NC(=O)CCCCC)\C=C(\C)/C)C(=C([C@@H](OC(=O)\C=C\C)C(=O)[C@]1(C([C@@]4(OC(=O)C)C(OC4)C[C@@H]1O)[C@@H]2Oc1ccccc1)C)C3(C)C)C	IC50	=	0.0021	uM	F	CELL-LINE	MCF7	865.97
FC(F)(F)[C@H](NC(OC(C)(C)C)=O)[C@@H](O)C(O[C@H]1C[C@@]2(O)[C@@H](OC(=O)c3ccccc3)[C@H]3[C@@](C)([C@@H](O)C[C@H]4OC[C@@]34OC(=O)C)C(=O)[C@H](OC(=O)C3CC3)C(C2(C)C)=C1C)=O	IC50	=	0.0005	uM	F	CELL-LINE	MCF7	867.864
FC(F)[C@H](NC(OC(C)(C)C)=O)[C@@H](O)C(O[C@H]1C[C@@]2(O)[C@@H](OC(=O)c3cc(OC)ccc3)C3[C@@](C)([C@@H](O)C[C@H]4OC[C@@]34OC(=O)C)C(=O)[C@H](OC(=O)CC)C(C2(C)C)=C1C)=O	IC50	=	0.0004	uM	F	CELL-LINE	MCF7	867.889
o1cccc1[C@H](NC(=O)\C=C\C)[C@@H](O)C(O[C@H]1C[C@@]2(O)[C@@H](OC(=O)c3cc(OC)ccc3OC)[C@H]3[C@@](C)([C@@H](O)C[C@H]4OC[C@@]34OC(=O)C)C(=O)[C@H](OC(=O)C)C(C2(C)C)=C1C)=O	IC50	=	0.13	uM	F	CELL-LINE	MCF7	867.898
O1[C@]23[C@@H](OC1=O)[C@H](OC(=O)[C@H](O)[C@@H](NC(OC(C)(C)C)=O)\C=C(\C)/C)C(=C([C@@H](OC(=O)\C=C\C)C(=O)[C@]1(C([C@@]4(OC(=O)C)C(OC4)C[C@@H]1O)[C@@H]2Oc1ccccc1)C)C3(C)C)C	IC50	=	0.0004	uM	F	CELL-LINE	MCF7	867.942
O1[C@]23[C@@H](OC1=O)[C@H](OC(=O)[C@H](O)[C@@H](NC(OC(C)(C)C)=O)\C=C(\C)/C)C(=C([C@@H](OC(=O)C1CC1)C(=O)[C@]1(C([C@@]4(OC(=O)C)C(OC4)C[C@@H]1O)[C@@H]2Oc1ccccc1)C)C3(C)C)C	IC50	=	0.0004	uM	F	CELL-LINE	MCF7	867.942
O1[C@]23[C@@H](OC1=O)[C@H](OC(=O)[C@H](O)[C@@H](NC(=O)CCCCC)\C=C(\C)/C)C(=C([C@@H](OC(=O)N(C)C)C(=O)[C@]1(C([C@@]4(OC(=O)C)C(OC4)C[C@@H]1O)[C@@H]2Oc1ccccc1)C)C3(C)C)C	IC50	=	0.0017	uM	F	CELL-LINE	MCF7	868.974
O1[C@@H]2C[C@H](O)[C@@]3([C@H]([C@H](OC(=O)c4ccccc4)[C@]4(O)C[C@H](OC(=O)[C@H](O)[C@@H](NC(OC(C)(C)C)=O)\C=C(\C)/C)C(=C([C@@H](OC(=O)NCC=C)C3=O)C4(C)C)C)[C@]2(OC(=O)C)C1)C	IC50	=	0.00044	uM	F	CELL-LINE	MCF7	868.974
O1[C@]23[C@@H](OC1=O)[C@H](OC(=O)[C@H](O)[C@@H](NC(OC(C)(C)C)=O)CC(C)C)C(=C([C@@H](OC(=O)C1CC1)C(=O)[C@]1(C([C@@]4(OC(=O)C)C(OC4)C[C@@H]1O)[C@@H]2Oc1ccccc1)C)C3(C)C)C	IC50	=	0.0007	uM	F	CELL-LINE	MCF7	869.958
O1[C@@H]2C[C@H](O)[C@@]3([C@H]([C@H](OC(=O)c4cc(OC)ccc4OC)[C@]4(O)C[C@H](OC(=O)[C@H](O)[C@@H](NC(=O)\C=C(\C)/C)\C=C(\C)/C)C(=C([C@@H](OC(=O)C)C3=O)C4(C)C)C)[C@]2(OC(=O)C)C1)C	IC50	=	0.02	uM	F	CELL-LINE	MCF7	869.958
O1[C@@H]2C[C@H](O)[C@@]3([C@H]([C@H](OC(=O)c4ccccc4)[C@]4(O)C[C@H](OC(=O)[C@H](O)[C@@H](NC(OC(C)(C)C)=O)\C=C(\C)/C)C(=C([C@@H](OC(=O)CCCC)C3=O)C4(C)C)C)[C@]2(OC(=O)C)C1)C	IC50	=	0.0005	uM	F	CELL-LINE	MCF7	870.002
O1[C@@H]2C[C@H](O)[C@@]3([C@H]([C@H](OC(=O)c4ccccc4)[C@]4(O)C[C@H](OC(=O)[C@H](O)[C@@H](NC(OC(C)(C)C)=O)\C=C(\C)/C)C(=C([C@@H](OC(=O)CC(C)C)C3=O)C4(C)C)C)[C@]2(OC(=O)C)C1)C	IC50	=	0.0004	uM	F	CELL-LINE	MCF7	870.002
FC(F)(F)[C@H](NC(OC(C)(C)C)=O)[C@@H](O)C(O[C@H]1C[C@@]2(O)[C@@H](OC(=O)c3ccccc3)[C@H]3[C@@](C)([C@@H](O)C[C@H]4OC[C@@]34OC(=O)C)C(=O)[C@H](OC(=O)N(C)C)C(C2(C)C)=C1C)=O	IC50	=	0.0006	uM	F	CELL-LINE	MCF7	870.868
O1[C@]23[C@@H](OC1=O)[C@H](OC(=O)[C@H](O)[C@@H](NC(OC(C)(C)C)=O)\C=C(\C)/C)C(=C([C@@H](OC(=O)N(C)C)C(=O)[C@]1(C([C@@]4(OC(=O)C)C(OC4)C[C@@H]1O)[C@@H]2Oc1ccccc1)C)C3(C)C)C	IC50	=	0.0004	uM	F	CELL-LINE	MCF7	870.946
O1[C@@H]2C[C@H](O)[C@@]3([C@H]([C@H](OC(=O)c4ccccc4)[C@]4(O)C[C@H](OC(=O)[C@H](O)[C@@H](NC(OC(C)(C)C)=O)\C=C(\C)/C)C(=C([C@@H](OC(=O)NC(C)C)C3=O)C4(C)C)C)[C@]2(OC(=O)C)C1)C	IC50	=	0.00046	uM	F	CELL-LINE	MCF7	870.99
O1[C@@H]2C[C@H](O)[C@@]3([C@H]([C@H](OC(=O)c4ccccc4)[C@]4(O)C[C@H](OC(=O)[C@H](O)[C@@H](NC(OC(C)(C)C)=O)\C=C(\C)/C)C(=C([C@@H](OC(=O)NCCC)C3=O)C4(C)C)C)[C@]2(OC(=O)C)C1)C	IC50	=	0.00036	uM	F	CELL-LINE	MCF7	870.99
O1[C@@H]2C[C@H](O)[C@@]3([C@H]([C@H](OC(=O)c4cc(N(C)C)ccc4)[C@]4(O)C[C@H](OC(=O)[C@H](O)[C@@H](NC(OC(C)(C)C)=O)\C=C(\C)/C)C(=C([C@@H](OC(=O)C)C3=O)C4(C)C)C)[C@]2(OC(=O)C)C1)C	IC50	=	0.001	uM	F	CELL-LINE	MCF7	870.99
O1[C@]23[C@@H](OC1=O)[C@H](OC(=O)[C@H](O)[C@@H](NC(OC(C)(C)C)=O)CC(C)C)C(=C([C@@H](OC(=O)C)C(=O)[C@]1([C@@H]([C@@]4(OC(=O)C)[C@H](OC4)C[C@@H]1O)[C@@H]2OC(=O)c1ccccc1)C)C3(C)C)C	IC50	=	0.0011	uM	F	CELL-LINE	MCF7	871.93
O1[C@@H]2C[C@H](O)[C@@]3(C([C@H](OC(=O)c4cc(OC)ccc4)[C@]4(O)C[C@H](OC(=O)[C@H](O)[C@@H](NC(OC(C)(C)C)=O)CCC=C)C(=C([C@@H](OC(=O)CC)C3=O)C4(C)C)C)[C@]2(OC(=O)C)C1)C	IC50	=	0.002	uM	F	CELL-LINE	MCF7	871.974
O1[C@@H]2C[C@H](O)[C@@]3(C([C@H](OC(=O)c4cc(OC)ccc4)[C@]4(O)C[C@H](OC(=O)[C@H](O)[C@@H](NC(OC(C)(C)C)=O)\C=C(\C)/C)C(=C([C@@H](OC(=O)CC)C3=O)C4(C)C)C)[C@]2(OC(=O)C)C1)C	IC50	=	0.00036	uM	F	CELL-LINE	MCF7	871.974
O1[C@]23[C@@H](OC1=O)[C@H](OC(=O)[C@H](O)[C@@H](NC(OC(C)(C)C)=O)CC(C)C)C(=C([C@@H](OC(=O)N(C)C)C(=O)[C@]1(C([C@@]4(OC(=O)C)C(OC4)C[C@@H]1O)[C@@H]2Oc1ccccc1)C)C3(C)C)C	IC50	=	0.0006	uM	F	CELL-LINE	MCF7	872.962
O1C[C@@H](O)[C@H](O)[C@@H](OC(=O)c2ccc(OC)cc2)[C@@H]1O[C@@H]1[C@@H](OC(=O)C)[C@@H](OC[C@@H]1O)O[C@H]1C[C@H]2[C@H]3[C@H](CC[C@]2(C)[C@@]1(O)[C@@H](C(=O)CCC(C)C)C)[C@@]1(C(C[C@@H](O)CC1)=CC3)C	IC50	=	7	uM	F	CELL-LINE	MCF7	873.046
O1CC(O)C(O)C(OC(=O)c2ccc(OC)cc2)C1OC1C(OC(=O)C)C(OCC1O)O[C@H]1CC2C3C(CC([C@@H](C(=O)CCC(C)C)C)[C@]2(C)[C@@H]1O)[C@@]1(C(C[C@@H](O)CC1)=CC3)C	IC50	=	0.27	uM	F	CELL-LINE	MCF7	873.046
O1[C@@H]2C[C@H](O)[C@@]3(C([C@H](OC(=O)c4cc(OC)ccc4)[C@]4(O)C[C@H](OC(=O)[C@H](O)[C@@H](NC(OC(C)(C)C)=O)CC(C)C)C(=C([C@@H](OC(=O)CC)C3=O)C4(C)C)C)[C@]2(OC(=O)C)C1)C	IC50	=	0.00036	uM	F	CELL-LINE	MCF7	873.99
O1CC(O)C(O)C(OC(=O)c2ccc(OC)cc2)C1OC1C(OC(=O)C)C(OCC1O)O[C@H]1CC2C3C(CC([C@@H](C(O)CCC(C)C)C)[C@]2(C)[C@@H]1O)[C@@]1(C(C[C@@H](O)CC1)=CC3)C	IC50	=	1.79	uM	F	CELL-LINE	MCF7	875.062
O1[C@@H]2C[C@H](O)[C@@]3(C([C@H](NC(=O)c4cc(OC)ccc4)[C@]4(O)C[C@H](OC(=O)[C@@H](O)[C@@H](NC(OC(C)(C)C)=O)c5ccccc5)C(=C([C@@H](OC(=O)C)C3=O)C4(C)C)C)[C@]2(OC(=O)C)C1)C	IC50	=	0.073	uM	F	CELL-LINE	MCF7	878.969
O1[C@@H]2C[C@H](O)[C@@]3([C@H]([C@H](OC(=O)c4ccccc4)[C@]4(O)CC(OC(=O)[C@@]5(O)CCc6c(cccc6)[C@@H]5NC(=O)c5ccccc5)C(=C([C@@H](OC(=O)C)C3=O)C4(C)C)C)[C@]2(OC(=O)C)C1)C	ED50	=	0.333	uM	F	CELL-LINE	MCF7	879.956
O1C2(OC3C([C@@H]2C)[C@@]2(C(C4C(C[C@H]2O)[C@@]2(C(CC4)Cc4nc5C[C@@]6(C7C[C@@H](O)[C@]8(C(C7CCC6Cc5nc4C2)=CC2O[C@@]4(OC[C@@](O)(CC4)C)C(C)C28O)C)C)C)=C3)C)CCC1(C)C	GI50	=	0.037	uM	F	CELL-LINE	MCF7	881.208
o1cccc1C(=O)N[C@H]([C@@H](O)C(O[C@H]1C[C@@]2(O)[C@@H](OC(=O)c3cc(OC)ccc3OC)[C@H]3[C@@](C)([C@@H](O)C[C@H]4OC[C@@]34OC(=O)C)C(=O)[C@H](OC(=O)C)C(C2(C)C)=C1C)=O)\C=C(\C)/C	IC50	=	0.03	uM	F	CELL-LINE	MCF7	881.925
o1cccc1[C@H](NC(=O)\C=C(\C)/C)[C@@H](O)C(O[C@H]1C[C@@]2(O)[C@@H](OC(=O)c3cc(OC)ccc3OC)[C@H]3[C@@](C)([C@@H](O)C[C@H]4OC[C@@]34OC(=O)C)C(=O)[C@H](OC(=O)C)C(C2(C)C)=C1C)=O	IC50	=	0.04	uM	F	CELL-LINE	MCF7	881.925
O1[C@@H]2C[C@H](O)[C@@]3(C([C@H](OC(=O)c4cc(N=[N+]=[N-])ccc4)[C@]4(O)C[C@H](OC(=O)[C@H](O)[C@@H](NC(OC(C)(C)C)=O)\C=C(\C)/C)C(=C([C@@H](OC(=O)CC)C3=O)C4(C)C)C)[C@]2(OC(=O)C)C1)C	IC50	=	0.0009	uM	F	CELL-LINE	MCF7	882.961
O1C2(OC3C([C@@H]2C)[C@@]2([C@H](C4C(C[C@H]2O)[C@@]2(C(CC4)Cc4nc5C[C@@]6(C7C[C@@H](O)[C@]8(C(C7CCC6Cc5nc4C2)=CC2O[C@@]4(OC[C@@](O)(CC4)C)[C@@H](C)C28O)C)C)C)C3)C)CCC1(C)C	GI50	=	0.056	uM	F	CELL-LINE	MCF7	883.224
Clc1cc(ccc1)C(=O)N[C@H]1C2[C@@](C)([C@@H](O)C[C@H]3OC[C@@]23OC(=O)C)C(=O)[C@H](OC(=O)C)C=2C(C)(C)[C@@]1(O)C[C@H](OC(=O)[C@@H](O)[C@@H](NC(OC(C)(C)C)=O)c1ccccc1)C=2C	IC50	=	0.11	uM	F	CELL-LINE	MCF7	883.388
FC(F)(F)[C@H](NC(OC(C)(C)C)=O)[C@@H](O)C(O[C@H]1C[C@@]2(O)[C@@H](OC(=O)c3ccccc3)[C@H]3[C@@](C)([C@@H](O)C[C@H]4OC[C@@]34OC(=O)C)C(=O)[C@H](OC(=O)CCCC)C(C2(C)C)=C1C)=O	IC50	=	0.0007	uM	F	CELL-LINE	MCF7	883.907
s1cccc1[C@H](NC(=O)\C=C\C)[C@@H](O)C(O[C@H]1C[C@@]2(O)[C@@H](OC(=O)c3cc(OC)ccc3OC)[C@H]3[C@@](C)([C@@H](O)C[C@H]4OC[C@@]34OC(=O)C)C(=O)[C@H](OC(=O)C)C(C2(C)C)=C1C)=O	IC50	=	0.16	uM	F	CELL-LINE	MCF7	883.965
O1[C@@H]2C[C@H](O)[C@@]3([C@H]([C@H](OC(=O)c4ccccc4)[C@]4(O)C[C@H](OC(=O)[C@H](O)[C@@H](NC(OC(C)(C)C)=O)\C=C(\C)/C)C(=C([C@@H](OC(=O)CCCCC)C3=O)C4(C)C)C)[C@]2(OC(=O)C)C1)C	IC50	=	0.0004	uM	F	CELL-LINE	MCF7	884.029
O1[C@@H]2C[C@H](O)[C@@]3([C@H]([C@H](OC(=O)c4ccccc4)[C@]4(O)C[C@H](OC(=O)[C@H](O)[C@@H](NC(OC(C)(C)C)=O)\C=C(\C)/C)C(=C([C@@H](OC(=O)CC(C)(C)C)C3=O)C4(C)C)C)[C@]2(OC(=O)C)C1)C	IC50	=	0.0004	uM	F	CELL-LINE	MCF7	884.029
O1[C@@H]2C[C@H](O)[C@@]3(C([C@H](OC(=O)c4cc(N=[N+]=[N-])ccc4)[C@]4(O)C[C@H](OC(=O)[C@H](O)[C@@H](NC(OC(C)(C)C)=O)CC(C)C)C(=C([C@@H](OC(=O)CC)C3=O)C4(C)C)C)[C@]2(OC(=O)C)C1)C	IC50	=	0.001	uM	F	CELL-LINE	MCF7	884.977
O1[C@@H]2C[C@H](O)[C@@]3([C@H]([C@H](OC(=O)c4ccccc4)[C@]4(O)C[C@H](OC(=O)[C@H](O)[C@@H](NC(OC(C)(C)C)=O)\C=C(\C)/C)C(=C([C@@H](OC(=O)N(CC)CC)C3=O)C4(C)C)C)[C@]2(OC(=O)C)C1)C	IC50	=	0.0002	uM	F	CELL-LINE	MCF7	885.017
O1[C@@H]2C[C@H](O)[C@@]3(C([C@H](OC(=O)c4cc(OC)ccc4)[C@]4(O)C[C@H](OC(=O)[C@H](O)[C@@H](NC(OC(C)(C)C)=O)[C@H]5CC5(C)C)C(=C([C@@H](OC(=O)CC)C3=O)C4(C)C)C)[C@]2(OC(=O)C)C1)C	IC50	=	0.0006	uM	F	CELL-LINE	MCF7	886.001
O1[C@@H]2C[C@H](O)[C@@]3([C@H]([C@H](OC(=O)c4cc(OC)ccc4OC)[C@]4(O)C[C@H](OC(=O)[C@H](O)[C@@H](NC(OC(C)(C)C)=O)\C=C(\C)/C)C(=C([C@@H](OC(=O)C)C3=O)C4(C)C)C)[C@]2(OC(=O)C)C1)C	IC50	=	3e-05	uM	F	CELL-LINE	MCF7	887.973
O1[C@@H]2C[C@H](O)[C@@]3([C@H]([C@H](OC(=O)c4cc(OC)ccc4OC)[C@]4(O)C[C@H](OC(=O)[C@H](O)[C@@H](NC(OCCCC)=O)\C=C(\C)/C)C(=C([C@@H](OC(=O)C)C3=O)C4(C)C)C)[C@]2(OC(=O)C)C1)C	IC50	=	0.03	uM	F	CELL-LINE	MCF7	887.973
O1[C@@H]2C[C@H](O)[C@@]3([C@H]([C@H](OC(=O)c4cc(OC)ccc4OC)[C@]4(O)C[C@H](OC(=O)[C@H](O)[C@@H](NC(=O)c5ccccc5)\C=C(\C)/C)C(=C([C@@H](OC(=O)C)C3=O)C4(C)C)C)[C@]2(OC(=O)C)C1)C	IC50	=	0.04	uM	F	CELL-LINE	MCF7	891.964
o1cccc1C(=O)N[C@H]([C@@H](O)C(O[C@H]1C[C@@]2(O)[C@@H](OC(=O)c3cc(OC)ccc3OC)[C@H]3[C@@](C)([C@@H](O)C[C@H]4OC[C@@]34OC(=O)C)C(=O)[C@H](OC(=O)C)C(C2(C)C)=C1C)=O)c1occc1	IC50	=	0.12	uM	F	CELL-LINE	MCF7	893.892
O1[C@]23[C@@H](OC1=O)[C@H](OC(=O)[C@](O)([C@@H](NC(OC(C)(C)C)=O)c1occc1)C)C(=C([C@@H](OC(=O)C)C(=O)[C@]1([C@@H]([C@@]4(OC(=O)C)[C@H](OC4)C[C@@H]1O)[C@@H]2OC(=O)c1ccccc1)C)C3(C)C)C	IC50	=	0.0017	uM	F	CELL-LINE	MCF7	895.908
O1[C@@H]2C[C@H](O)[C@@]3([C@H]([C@H](OC(=O)c4ccccc4)[C@]4(O)C[C@H](OC(=O)[C@H](O)[C@@H](NC(OC(C)(C)C)=O)\C=C(\C)/C)C(=C([C@@H](OC(=O)C5CCCCC5)C3=O)C4(C)C)C)[C@]2(OC(=O)C)C1)C	IC50	=	0.00046	uM	F	CELL-LINE	MCF7	896.04
O1C2(OC3C([C@@H]2C)[C@@]2(C(C4C(C[C@H]2O)[C@@]2(C(CC4)Cc4nc5C[C@@]6(C7C[C@@H](O)[C@]8(C(C7CCC6Cc5nc4C2)=CC2OC4(O[C@@](C[C@H]4O)(CO)C)[C@@H](C)C28O)C)C)C)=C3)C)CCC1(C)C	GI50	=	0.0034	uM	F	CELL-LINE	MCF7	897.207
FC(F)(F)[C@H](NC(OC(C)(C)C)=O)[C@@H](O)C(O[C@H]1C[C@@]2(O)[C@@H](OC(=O)c3ccccc3)[C@H]3[C@@](C)([C@@H](O)C[C@H]4OC[C@@]34OC(=O)C)C(=O)[C@H](OC(=O)CC(C)(C)C)C(C2(C)C)=C1C)=O	IC50	=	0.0005	uM	F	CELL-LINE	MCF7	897.934
s1cccc1C(=O)N[C@H]([C@@H](O)C(O[C@H]1C[C@@]2(O)[C@@H](OC(=O)c3cc(OC)ccc3OC)[C@H]3[C@@](C)([C@@H](O)C[C@H]4OC[C@@]34OC(=O)C)C(=O)[C@H](OC(=O)C)C(C2(C)C)=C1C)=O)\C=C(\C)/C	IC50	=	0.03	uM	F	CELL-LINE	MCF7	897.992
s1cccc1[C@H](NC(=O)\C=C(\C)/C)[C@@H](O)C(O[C@H]1C[C@@]2(O)[C@@H](OC(=O)c3cc(OC)ccc3OC)[C@H]3[C@@](C)([C@@H](O)C[C@H]4OC[C@@]34OC(=O)C)C(=O)[C@H](OC(=O)C)C(C2(C)C)=C1C)=O	IC50	=	0.05	uM	F	CELL-LINE	MCF7	897.992
O1CCN(CC1)C(O[C@@H]1C=2C(C)(C)[C@@](O)(C[C@H](OC(=O)[C@H](O)[C@@H](NC(OC(C)(C)C)=O)\C=C(\C)/C)C=2C)[C@@H](OC(=O)c2ccccc2)[C@H]2[C@@](C)([C@@H](O)C[C@H]3OC[C@@]23OC(=O)C)C1=O)=O	IC50	=	9e-05	uM	F	CELL-LINE	MCF7	899
o1cccc1[C@H](NC(OC(C)(C)C)=O)[C@@H](O)C(O[C@H]1C[C@@]2(O)[C@@H](OC(=O)c3cc(OC)ccc3OC)[C@H]3[C@@](C)([C@@H](O)C[C@H]4OC[C@@]34OC(=O)C)C(=O)[C@H](OC(=O)C)C(C2(C)C)=C1C)=O	IC50	=	0.04	uM	F	CELL-LINE	MCF7	899.94
o1cccc1[C@H](NC(OCCCC)=O)[C@@H](O)C(O[C@H]1C[C@@]2(O)[C@@H](OC(=O)c3cc(OC)ccc3OC)[C@H]3[C@@](C)([C@@H](O)C[C@H]4OC[C@@]34OC(=O)C)C(=O)[C@H](OC(=O)C)C(C2(C)C)=C1C)=O	IC50	=	0.03	uM	F	CELL-LINE	MCF7	899.94
S1C[C@@H]2NC(=O)N[C@@H]2C1CCCCC(=O)NCCCCCCNC(=O)CCCNC(=O)[C@]12C(C3[C@](CC1)(C)[C@]1(C(=CC3=O)[C@@]3([C@@H](CC1)C(C)(C)C(=O)C(=C3)C#N)C)C)CC(CC2)(C)C	IC50	=	5.26	uM	F	CELL-LINE	MCF7	901.271
o1cccc1[C@H](NC(=O)c1ccccc1)[C@@H](O)C(O[C@H]1C[C@@]2(O)[C@@H](OC(=O)c3cc(OC)ccc3OC)[C@H]3[C@@](C)([C@@H](O)C[C@H]4OC[C@@]34OC(=O)C)C(=O)[C@H](OC(=O)C)C(C2(C)C)=C1C)=O	IC50	=	0.21	uM	F	CELL-LINE	MCF7	903.931
s1cccc1[C@H](NC(=O)c1occc1)[C@@H](O)C(O[C@H]1C[C@@]2(O)[C@@H](OC(=O)c3cc(OC)ccc3OC)[C@H]3[C@@](C)([C@@H](O)C[C@H]4OC[C@@]34OC(=O)C)C(=O)[C@H](OC(=O)C)C(C2(C)C)=C1C)=O	IC50	=	0.06	uM	F	CELL-LINE	MCF7	909.959
s1cccc1C(=O)N[C@H]([C@@H](O)C(O[C@H]1C[C@@]2(O)[C@@H](OC(=O)c3cc(OC)ccc3OC)[C@H]3[C@@](C)([C@@H](O)C[C@H]4OC[C@@]34OC(=O)C)C(=O)[C@H](OC(=O)C)C(C2(C)C)=C1C)=O)c1occc1	IC50	=	0.06	uM	F	CELL-LINE	MCF7	909.959
O1[C@@H]2C[C@H](O)[C@@]3([C@H]([C@H](OC(=O)c4cc(OC)ccc4OC)[C@]4(O)C[C@H](OC(=O)[C@H](O)[C@@H](NC(OC(C)(C)C)=O)c5ccccc5)C(=C([C@@H](OC(=O)C)C3=O)C4(C)C)C)[C@]2(OC(=O)C)C1)C	IC50	=	0.06	uM	F	CELL-LINE	MCF7	909.979
O1[C@@H]2C[C@H](O)[C@@]3([C@H]([C@H](OC(=O)c4ccccc4)[C@]4(O)C[C@H](OC(=O)[C@H](O)[C@@H](NC(OC(C)(C)C)=O)\C=C(\C)/C)C(=C([C@@H](OC(=O)NC5CCCCC5)C3=O)C4(C)C)C)[C@]2(OC(=O)C)C1)C	IC50	=	0.00033	uM	F	CELL-LINE	MCF7	911.055
O1[C@@]2(OC[C@@]34[C@H](CC=C3[C@H]3[C@H](CC4=O)[C@@]4([C@H](Cc5nc6C[C@]7([C@H](Cc6nc5C4)CC[C@@H]4[C@@H]7C[C@@H](O)[C@]5(C4=C[C@@H]4O[C@]6(O[C@@](C[C@H]6O)(CO)C)[C@@H](C)[C@@]45O)C)C)CC3)C)[C@@H]2C)[C@H](O)CC1(C)C	GI50	=	0.0025	uM	F	CELL-LINE	MCF7	911.19
FC(F)(F)[C@H](NC(OC(C)(C)C)=O)[C@@H](O)C(O[C@H]1C[C@@]2(O)[C@@H](OC(=O)c3ccccc3)[C@H]3[C@@](C)([C@@H](O)C[C@H]4OC[C@@]34OC(=O)C)C(=O)[C@H](OC(=O)N3CCOCC3)C(C2(C)C)=C1C)=O	IC50	=	0.0004	uM	F	CELL-LINE	MCF7	912.905
O1[C@@H]2C[C@H](O)[C@@]3([C@H]([C@H](OC(=O)c4ccccc4)[C@]4(O)C[C@H](OC(=O)[C@H](O)[C@@H](NC(OC(C)(C)C)=O)CC(C)C)C(=C([C@@H](OC(=O)NC5CCCCC5)C3=O)C4(C)C)C)[C@]2(OC(=O)C)C1)C	IC50	=	0.0016	uM	F	CELL-LINE	MCF7	913.071
O1[C@@](C[C@@H](O)C12OC1C=C3C4C(C[C@@H](O)[C@]3(C)C1(O)[C@@H]2C)[C@@]1(C(CC4)Cc2nc3C[C@@]4(C5CC(=O)[C@]67C(CCC6C5CCC4Cc3nc2C1)[C@H](C)[C@]1(OC(C[C@H]1O)(C)C)OC7)C)C)(CO)C	GI50	=	0.0035	uM	F	CELL-LINE	MCF7	913.206
O1C[C@@](O)(CC[C@]12O[C@H]1C=C3[C@@H]4[C@H](C[C@@H](O)[C@]3(C)[C@@]1(O)[C@@H]2C)[C@@]1([C@H](Cc2nc3C[C@]5([C@H](Cc3nc2C1)CC[C@@H]1[C@@H]5C[C@@H](O)[C@]2(C1=C[C@@H]1O[C@@]3(OC[C@](O)(CC3)C)[C@@H](C)[C@@]12O)C)C)CC4)C)C	GI50	=	0.1	uM	F	CELL-LINE	MCF7	913.206
O1[C@@H]2C[C@H](O)[C@@]3([C@H]([C@H](OC(=O)c4cc(OC)ccc4OC)[C@]4(O)C[C@H](OC(=O)[C@H](O)[C@@H](NC(=O)c5ccccc5)c5ccccc5)C(=C([C@@H](OC(=O)C)C3=O)C4(C)C)C)[C@]2(OC(=O)C)C1)C	IC50	=	0.03	uM	F	CELL-LINE	MCF7	913.97
O1[C@]2(O[C@H]3C=C4[C@H]5[C@H](C[C@@H](O)[C@]4(C)[C@@]3(O)[C@@H]2C)[C@@]2([C@H](Cc3nc4C[C@]6([C@H](Cc4nc3C2)CC[C@@H]2[C@@H]6C[C@@H](O)[C@]3(C2=C[C@@H]2O[C@@]4(OC[C@@](O)(CC4)C)C[C@@]23O)C)C)CC5)C)[C@H](O)C[C@]1(CO)C	GI50	=	0.027	uM	F	CELL-LINE	MCF7	915.178
s1cccc1[C@H](NC(OCCCC)=O)[C@@H](O)C(O[C@H]1C[C@@]2(O)[C@@H](OC(=O)c3cc(OC)ccc3OC)[C@H]3[C@@](C)([C@@H](O)C[C@H]4OC[C@@]34OC(=O)C)C(=O)[C@H](OC(=O)C)C(C2(C)C)=C1C)=O	IC50	=	0.04	uM	F	CELL-LINE	MCF7	916.007
s1cccc1[C@H](NC(OC(C)(C)C)=O)[C@@H](O)C(O[C@H]1C[C@@]2(O)[C@@H](OC(=O)c3cc(OC)ccc3OC)[C@H]3[C@@](C)([C@@H](O)C[C@H]4OC[C@@]34OC(=O)C)C(=O)[C@H](OC(=O)C)C(C2(C)C)=C1C)=O	IC50	=	0.03	uM	F	CELL-LINE	MCF7	916.007
S(SC)CCC(O[C@@H]1C=2C(C)(C)[C@@](O)(C[C@H](OC(=O)[C@H](O)[C@@H](NC(OC(C)(C)C)=O)\C=C(\C)/C)C=2C)[C@@H](OC(=O)c2ccccc2)C2[C@](C)(C1=O)C(O)C[C@H]1OC[C@]12OC(=O)C)=O	IC50	=	0.001	uM	F	CELL-LINE	MCF7	920.107
s1cccc1C(=O)N[C@H]([C@@H](O)C(O[C@H]1C[C@@]2(O)[C@@H](OC(=O)c3cc(OC)ccc3OC)[C@H]3[C@@](C)([C@@H](O)C[C@H]4OC[C@@]34OC(=O)C)C(=O)[C@H](OC(=O)C)C(C2(C)C)=C1C)=O)c1sccc1	IC50	=	0.03	uM	F	CELL-LINE	MCF7	926.026
S(SC)CCC(O[C@@H]1C=2C(C)(C)[C@@](O)(C[C@H](OC(=O)[C@H](O)[C@@H](NC(OC(C)(C)C)=O)\C=C(\C)/C)C=2C)[C@@H](OC(=O)c2cc(OC)ccc2)[C@H]2[C@@](C)([C@@H](O)C[C@H]3OC[C@@]23OC(=O)C)C1=O)=O	IC50	=	3e-05	uM	F	CELL-LINE	MCF7	950.133
O=C1C=C2NC(=O)/C(=C/C=C\[C@H](OC)[C@@H](OC(=O)N)C\C(=C\[C@@H](C)[C@H](O)[C@@H](OC)C[C@H](CC(=C1NCCCCC#C[C@]1(O)CC[C@]3(C4CCC5=CC(=O)CC[C@]5(C)[C@]4(CC[C@]13C)C)C)C2=O)C)\C)/C	IC50	=	0.3	uM	F	CELL-LINE	MCF7	954.259
Clc1cc(ccc1)C(O[C@H]1[C@H]2[C@@](C)([C@@H](O)C[C@H]3OC[C@@]23OC(=O)C)C(=O)[C@H](OC(=O)CCSSC)C=2C(C)(C)[C@@]1(O)C[C@H](OC(=O)[C@H](O)[C@@H](NC(OC(C)(C)C)=O)\C=C(\C)/C)C=2C)=O	IC50	=	8e-05	uM	F	CELL-LINE	MCF7	954.552
S(SC)CCC(O[C@@H]1C=2C(C)(C)[C@@](O)(C[C@H](OC(=O)[C@H](O)[C@@H](NC(OC(C)(C)C)=O)\C=C(\C)/C)C=2C)[C@@H](OC(=O)c2cc(F)cc(F)c2)[C@H]2[C@@](C)([C@@H](O)C[C@H]3OC[C@@]23OC(=O)C)C1=O)=O	IC50	=	0.00015	uM	F	CELL-LINE	MCF7	956.087
S(SC)CCC(O[C@@H]1C=2C(C)(C)[C@@](O)(C[C@H](OC(=O)[C@H](O)[C@@H](NC(OC(C)(C)C)=O)\C=C(\C)/C)C=2C)[C@@H](OC(=O)c2cc(N(C)C)ccc2)[C@H]2[C@@](C)([C@@H](O)C[C@H]3OC[C@@]23OC(=O)C)C1=O)=O	IC50	=	0.003	uM	F	CELL-LINE	MCF7	963.176
S(SC)CCC(O[C@@H]1C=2C(C)(C)[C@@](O)(C[C@H](OC(=O)[C@H](O)[C@@H](NC(OC(C)(C)C)=O)\C=C(\C)/C)C=2C)[C@@H](OC(=O)c2cc(OC)ccc2OC)[C@H]2[C@@](C)([C@@H](O)C[C@H]3OC[C@@]23OC(=O)C)C1=O)=O	IC50	=	4e-05	uM	F	CELL-LINE	MCF7	980.159
S(SC)CCC(O[C@@H]1C=2C(C)(C)[C@@](O)(C[C@H](OC(=O)[C@H](O)[C@@H](NC(OC(C)(C)C)=O)\C=C(\C)/C)C=2C)[C@@H](OC(=O)c2cc(OC)ccc2OC)C2[C@](C)(C1=O)C(O)C[C@H]1OC[C@]12OC(=O)C)=O	IC50	=	5e-05	uM	F	CELL-LINE	MCF7	980.159
S(SC)CCC(OC1C[C@H]2OC[C@@]2(OC(=O)C)C2[C@]1(C)C(=O)[C@H](O)C=1C(C)(C)[C@@](O)(C[C@H](OC(=O)[C@H](O)[C@@H](NC(OC(C)(C)C)=O)\C=C(\C)/C)C=1C)[C@H]2OC(=O)c1cc(OC)ccc1OC)=O	IC50	=	7e-05	uM	F	CELL-LINE	MCF7	980.159
O1C2C[C@H](O)[C@@]3(C([C@]2(OC(=O)C)C1)[C@H](OC(=O)c1ccccc1)C1C[C@H](OC(=O)[C@H](OC(=O)c2ccc(cc2)C(=O)C)[C@@H](NC(=O)c2ccccc2)c2ccccc2)C(=C([C@@H](OC(=O)C)C3=O)C1(C)C)C)C	IC50	=	0.13	uM	F	CELL-LINE	MCF7	984.064
S(C)c1[nH]c2c(n1)C(=O)C=CC2=O	ic50	=	62.65	uM	F	CELL-LINE	MCF7	194.214
O1[C@@H](OC(=O)C)[C@@H](C)[C@](C(=O)C)(C)C1=O	IC50	=	6	uM	F	CELL-LINE	MCF7	214.217
S(C)c1[nH]c2c(n1)C(=O)C(OC)=CC2=O	ic50	=	36	uM	F	CELL-LINE	MCF7	224.24
O(C)C1=CC(=O)c2[nH]c(nc2C1=O)-c1ncccc1	ic50	=	26.4	uM	F	CELL-LINE	MCF7	255.233
O1[C@@H](OC(=O)C(C)(C)C)[C@@H](C)[C@](C(=O)C)(C)C1=O	IC50	=	3	uM	F	CELL-LINE	MCF7	256.298
O1[C@@H](OC(=O)C(C)(C)C)[C@@H](C)[C@@](C(=O)C)(C)C1=O	IC50	=	7	uM	F	CELL-LINE	MCF7	256.298
O1[C@@H](OC(=O)C)[C@@H](C)[C@](C(=O)C)(CCC(=O)C)C1=O	IC50	=	6	uM	F	CELL-LINE	MCF7	270.281
BrC1=CC(=O)c2[nH]c(SC)nc2C1=O	ic50	=	62.8	uM	F	CELL-LINE	MCF7	273.11
O1[C@@H](OC(=O)c2ccccc2)[C@@H](C)[C@@](C(=O)C)(C)C1=O	IC50	=	8	uM	F	CELL-LINE	MCF7	276.288
O1[C@@H](OC(=O)c2ccccc2)[C@@H](C)[C@](C(=O)C)(C)C1=O	IC50	=	3	uM	F	CELL-LINE	MCF7	276.288
O1[C@@H](OC(=O)C)[C@@H](C)[C@@](C(=O)c2ccccc2)(C)C1=O	IC50	=	15	uM	F	CELL-LINE	MCF7	276.288
Br[C@@]1(C(=O)C)[C@H](C)[C@@H](OC1=O)OC(=O)C	IC50	=	17	uM	F	CELL-LINE	MCF7	279.086
O1[C@@H](OC(=O)C)[C@@H](C)[C@](Cc2ccccc2)(C(=O)C)C1=O	IC50	=	51	uM	F	CELL-LINE	MCF7	290.315
O1[C@@H](OC(=O)C)[C@@H](C)[C@@](Cc2ccccc2)(C(=O)C)C1=O	IC50	=	48	uM	F	CELL-LINE	MCF7	290.315
BrCC(=O)[C@]1(C)[C@H](C)[C@@H](OC1=O)OC(=O)C	IC50	=	4	uM	F	CELL-LINE	MCF7	293.113
O1[C@@H](OC(=O)C)[C@@H](C)[C@@](OC(=O)c2ccccc2)(C(=O)C)C1=O	IC50	=	22	uM	F	CELL-LINE	MCF7	320.297
O1[C@H](C[NH+](C\C=C/C[NH3+])C)[C@@H](O)[C@@H](O)[C@@H]1n1c2ncnc(N)c2nc1	IC50	=	200	uM	F	CELL-LINE	MCF7	351.411
BrC1=C(Br)C(=O)c2[nH]c(SC)nc2C1=O	ic50	=	40.3	uM	F	CELL-LINE	MCF7	352.006
[nH]1c2c(c3c1cccc3)ccnc2C	ED50	=	104.266	uM	F	CELL-LINE	MCF7	182.226
Oc1ccc(O)cc1\C=C\C(OC)=O	IC50	=	1.90539	uM	F	CELL-LINE	MCF7	194.186
S1[C@@](\C=C(\C=C)/C)(C)C(=O)C=C1[O-]	IC50	=	206.389	uM	F	CELL-LINE	MCF7	195.262
O=C1C=C2NC=3C(=C2C=C1)C=CNC=3C	ED50	=	46.4119	uM	F	CELL-LINE	MCF7	198.225
O=C1[C@H](O)CC(C)(C)C(CCO)=C1C	ED50	=	232.016	uM	F	CELL-LINE	MCF7	198.262
S1[C@@](CCC)(C)C(OC)=C(C)C1=O	IC50	=	53.9186	uM	F	CELL-LINE	MCF7	200.302
Oc1ccc(O)cc1\C=C\C(OCC)=O	IC50	=	3.21786	uM	F	CELL-LINE	MCF7	208.213
S1[C@@](\C=C(\C=C)/C)(C)C([O-])=C(C)C1=O	IC50	=	199.724	uM	F	CELL-LINE	MCF7	209.289
S1[C@@](\C=C(\C=C\C)/C)(C)C(=O)C=C1[O-]	IC50	=	82.6608	uM	F	CELL-LINE	MCF7	209.289
S1[C@@](\C=C\C=C\CC)(C)C(=O)C=C1[O-]	IC50	=	80.7496	uM	F	CELL-LINE	MCF7	209.289
O(C)c1cc2[nH]c3c(c2cc1)ccnc3C	ED50	=	49.4695	uM	F	CELL-LINE	MCF7	212.252
S1[C@@](CCCCCC)(C)C(=O)C=C1[O-]	IC50	=	77.3482	uM	F	CELL-LINE	MCF7	213.321
O(C)c1cc2[nH]c3c(CCN=C3C)c2cc1	ED50	=	46.6705	uM	F	CELL-LINE	MCF7	214.268
O1c2cc(OC)ccc2N(C=O)C(O)=C1C	ED50	=	18.0822	uM	F	CELL-LINE	MCF7	221.212
O=C1c2c(ncc(c2)C)C(=O)c2c1cccc2	IC50	=	82.1123	uM	F	CELL-LINE	MCF7	223.231
O=C1CC(Nc2c1cccc2)c1ccccc1	ED50	=	0.582242	uM	F	CELL-LINE	MCF7	223.275
O(C)c1cc2n(c3c(c2cc1)ccnc3C)C	ED50	=	19.0031	uM	F	CELL-LINE	MCF7	226.279
O(C)C=1C=CC2=C3C(N=C2C=1)=C(N(C=C3)C)C	ED50	=	24.7482	uM	F	CELL-LINE	MCF7	226.279
O(CC)c1cc2[nH]c3c(c2cc1)ccnc3C	ED50	=	22.0966	uM	F	CELL-LINE	MCF7	226.279
O1c2c(C=CC1(C)C)c1nc(O)ccc1cc2	ED50	=	64.6828	uM	F	CELL-LINE	MCF7	227.263
O(C)c1cc2[nH]c3c(c2cc1)cc[n+](C)c3C	ED50	=	27.2783	uM	F	CELL-LINE	MCF7	227.287
Oc1cc(cc(O)c1)\C=C/c1ccc(O)cc1	GI50	=	64.842	uM	F	CELL-LINE	MCF7	228.247
Oc1cc(cc(O)c1)\C=C\c1ccc(O)cc1	GI50	=	17.0868	uM	F	CELL-LINE	MCF7	228.247
S1[C@@](CCCCCC)(C)C(OC)=CC1=O	IC50	=	61.3078	uM	F	CELL-LINE	MCF7	228.356
Oc1cc(cc(O)c1)C(=O)c1ccc(O)cc1	GI50	=	132.917	uM	F	CELL-LINE	MCF7	230.219
[nH]1c2c(c3cc4c(nc13)c(ccc4)C)cccc2	IC50	=	23.6777	uM	F	CELL-LINE	MCF7	232.286
S1[C@@](Cc2ccccc2)(C)C(OC)=CC1=O	IC50	=	261.609	uM	F	CELL-LINE	MCF7	234.319
O=C(\C=C\c1ccccc1C)c1ccccc1N	ED50	=	25.7056	uM	F	CELL-LINE	MCF7	237.302
S1[C@@](\C=C\C=C\CCCC)(C)C(=O)C=C1[O-]	IC50	=	95.2208	uM	F	CELL-LINE	MCF7	237.343
O=C1c2c(ncc(c2)CO)C(=O)c2c1cccc2	IC50	=	27.8393	uM	F	CELL-LINE	MCF7	239.23
O(C(=O)C)c1cc2[nH]c3c(c2cc1)ccnc3C	ED50	=	31.2159	uM	F	CELL-LINE	MCF7	240.262
O(C(C)C)c1cc2[nH]c3c(c2cc1)ccnc3C	ED50	=	49.5202	uM	F	CELL-LINE	MCF7	240.306
O(C)c1cc2n(c3c(c2cc1)ccnc3C)CC	ED50	=	22.0552	uM	F	CELL-LINE	MCF7	240.306
O1c2c(C=CC1(C)C)c1nc(O)cc(c1cc2)C	ED50	=	7.04546	uM	F	CELL-LINE	MCF7	241.29
S1[C@@](CCCCCCCC)(C)C(=O)C=C1[O-]	IC50	=	52.2009	uM	F	CELL-LINE	MCF7	241.375
O(C)c1ccc(cc1)\C=C\c1cc(O)cc(O)c1	GI50	=	14.0337	uM	F	CELL-LINE	MCF7	242.274
O(C)c1ccc(cc1)\C=C/c1cc(O)cc(O)c1	GI50	=	52.42	uM	F	CELL-LINE	MCF7	242.274
O(C)c1cc(cc(O)c1)C(=O)c1ccc(O)cc1	GI50	=	109.725	uM	F	CELL-LINE	MCF7	244.246
O(C)c1ccc(cc1)C(=O)c1cc(O)cc(O)c1	GI50	=	88.8449	uM	F	CELL-LINE	MCF7	244.246
S1[C@@](CCCCCC)(C)C(OCC#C)=CC1=O	IC50	=	86.7746	uM	F	CELL-LINE	MCF7	252.378
O1C(c2ccccc2C)C1C(=O)c1ccccc1N	ED50	=	76.9835	uM	F	CELL-LINE	MCF7	253.301
O(C)c1cc(ccc1)\C=C\C(=O)c1ccccc1N	ED50	=	5.13223	uM	F	CELL-LINE	MCF7	253.301
O(C)c1ccccc1C1Nc2c(cccc2)C(=O)C1	ED50	=	25.6612	uM	F	CELL-LINE	MCF7	253.301
O(C)c1cc(ccc1)C1Nc2c(cccc2)C(=O)C1	ED50	=	1.26332	uM	F	CELL-LINE	MCF7	253.301
O(C)c1cc(ccc1)[C@H]1Nc2c(cccc2)C(=O)C1	ED50	=	1.18436	uM	F	CELL-LINE	MCF7	253.301
O(C)c1cc(ccc1)[C@@H]1Nc2c(cccc2)C(=O)C1	ED50	=	2.36872	uM	F	CELL-LINE	MCF7	253.301
S1[C@@](CCCCCC)(C)C(OCC=C)=CC1=O	IC50	=	35.3782	uM	F	CELL-LINE	MCF7	254.394
O1c2c(C=CC1(C)C)c1nc(O)c(C)c(c1cc2)C	ED50	=	74.4173	uM	F	CELL-LINE	MCF7	255.317
S1[C@@](CCCCCCCC)(C)C(=O)C(C)=C1[O-]	IC50	=	64.604	uM	F	CELL-LINE	MCF7	255.402
O(C)c1cc(cc(OC)c1)\C=C\c1ccc(O)cc1	GI50	=	8.97382	uM	F	CELL-LINE	MCF7	256.301
O(C)c1cc(cc(OC)c1)\C=C/c1ccc(O)cc1	GI50	=	11.705	uM	F	CELL-LINE	MCF7	256.301
S1[C@@](CCCCCCCC)(C)C(OC)=CC1=O	IC50	=	63.9601	uM	F	CELL-LINE	MCF7	256.41
O(C)c1c2[n+](ccc3N(C=Cc(cc1OC)c23)C)C	ED50	=	19.043	uM	F	CELL-LINE	MCF7	257.313
Sc1nc2c(ccc3OC(C=Cc23)(C)C)c(c1)C	ED50	=	53.622	uM	F	CELL-LINE	MCF7	257.357
O(C)c1cc(cc(OC)c1)C(=O)c1ccc(O)cc1	GI50	=	8.51812	uM	F	CELL-LINE	MCF7	258.273
O(C)c1cc(cc(O)c1)C(=O)c1ccc(OC)cc1	GI50	=	54.9806	uM	F	CELL-LINE	MCF7	258.273
O(C)c1cc(cc(OC)c1)C(O)c1ccc(O)cc1	GI50	=	7.68377	uM	F	CELL-LINE	MCF7	260.289
O1c2c(-c3occ(c3C1=O)C)ccc1c2cccc1C	ED50	=	2.27032	uM	F	CELL-LINE	MCF7	264.28
[nH]1c2c(c3cc4c(nc13)c1c(cc4)cccc1)cccc2	IC50	=	266.101	uM	F	CELL-LINE	MCF7	268.319
O(C)c1cc2n(c3c(c2cc1)ccnc3C)CCCC	ED50	=	35.4002	uM	F	CELL-LINE	MCF7	268.36
O1c2c(C=CC1(C)C)c1nc(O)c(C)c(c1cc2C)C	ED50	=	141.084	uM	F	CELL-LINE	MCF7	269.344
S1[C@@](CCCCCCCC)(C)C(OC)=C(C)C1=O	IC50	=	63.9705	uM	F	CELL-LINE	MCF7	270.437
Oc1nc(nc2c1cccc2)-c1cc2c(cc1)cccc2	ED50	=	37.825	uM	F	CELL-LINE	MCF7	272.307
o1cc(c2c1-c1c(c3c(cc1)c(ccc3)C)C(=O)C2=O)C	ED50	=	2.96789	uM	F	CELL-LINE	MCF7	276.291
Oc1cc(nc2c1cccc2CC(=O)[O-])-c1ccccc1	ED50	=	1.5811	uM	F	CELL-LINE	MCF7	278.287
O=C1c2c(ncc(c2)COC(=O)C)C(=O)c2c1cccc2	IC50	=	23.8208	uM	F	CELL-LINE	MCF7	281.267
S1[C@@](CCCCCCCC)(C)C(=O)C(CC=C)=C1[O-]	IC50	=	123.65	uM	F	CELL-LINE	MCF7	281.44
O1c2cc(ccc2OC1)C(=O)\C=C\c1cc(OC)ccc1	ED50	=	67.3055	uM	F	CELL-LINE	MCF7	282.295
O(CCCCCC)c1cc2[nH]c3c(c2cc1)ccnc3C	ED50	=	10.9778	uM	F	CELL-LINE	MCF7	282.387
S1[C@@](CCCCCCCC)(C)C(OCC=C)=CC1=O	IC50	=	51.3369	uM	F	CELL-LINE	MCF7	282.448
S1[C@@](CCCCCCCC)(C)C(=O)C(C(=O)C)=C1[O-]	IC50	=	42.3412	uM	F	CELL-LINE	MCF7	283.412
Fc1ccccc1\C=C\C(=O)c1cc2OCOc2cc1N	ED50	=	9.11405	uM	F	CELL-LINE	MCF7	285.274
Fc1ccc(cc1)\C=C\C(=O)c1cc2OCOc2cc1N	ED50	=	17.8775	uM	F	CELL-LINE	MCF7	285.274
Fc1ccc(cc1)C1Nc2c(cc3OCOc3c2)C(=O)C1	ED50	=	1.40216	uM	F	CELL-LINE	MCF7	285.274
Fc1ccccc1[C@@H]1Nc2c(cc3OCOc3c2)C(=O)C1	ED50	=	2.97959	uM	F	CELL-LINE	MCF7	285.274
Fc1cc(ccc1)C1Nc2c(cc3OCOc3c2)C(=O)C1	ED50	=	0.112173	uM	F	CELL-LINE	MCF7	285.274
Fc1ccccc1[C@H]1Nc2c(cc3OCOc3c2)C(=O)C1	ED50	=	0.35054	uM	F	CELL-LINE	MCF7	285.274
Fc1ccccc1C1Nc2c(cc3OCOc3c2)C(=O)C1	ED50	=	0.210324	uM	F	CELL-LINE	MCF7	285.274
S1[C@@](CCCCCCCC)(C)C(=O)C(C(O)C)=C1[O-]	IC50	=	76.0262	uM	F	CELL-LINE	MCF7	285.428
Oc1c2c(C(=O)C=C(\C=C\C(OCC)=O)C2=O)c(O)cc1	IC50	=	16.2703	uM	F	CELL-LINE	MCF7	288.255
Brc1cc2c3c([nH]c2cc1OC)c(ncc3)C	ED50	=	50.1463	uM	F	CELL-LINE	MCF7	291.148
o1cc(c2c1-c1c(c3c(cc1)C(CCC3)(C)C)C(=O)C2=O)C	ED50	=	1.29098	uM	F	CELL-LINE	MCF7	294.35
O(C)c1cc2[C@@H]3[C@@H](NC(=O)c2cc1)[C@H](O)[C@H](O)[C@@H](O)[C@@H]3O	IC50	=	14.9006	uM	F	CELL-LINE	MCF7	295.291
Fc1ccccc1-c1nc2c(cccc2CC(=O)[O-])c(O)c1	ED50	=	0.405026	uM	F	CELL-LINE	MCF7	296.277
O1C[C@@H](C2=C1c1c(c3c(cc1)C(CCC3)(C)C)C(=O)C2=O)C	ED50	=	1.38342	uM	F	CELL-LINE	MCF7	296.366
S1[C@@](CCCCCCCC)(C)C(OCC=C)=C(C)C1=O	IC50	=	117.042	uM	F	CELL-LINE	MCF7	296.475
S1[C@@](CCCCCCCC)(C)C(=O)C(CC=C)(C)C1=O	IC50	=	136.605	uM	F	CELL-LINE	MCF7	296.475
Brc1cc2nc3[nH]c4c(c3cc2cc1)cccc4	IC50	=	144.033	uM	F	CELL-LINE	MCF7	297.155
O1c2cc(C(=O)\C=C\c3cc(OC)ccc3)c(N)cc2OC1	ED50	=	1.61448	uM	F	CELL-LINE	MCF7	297.31
O1c2c(OC1)cc1N[C@@H](CC(=O)c1c2)c1cc(OC)ccc1	ED50	=	0.100905	uM	F	CELL-LINE	MCF7	297.31
O1c2c(OC1)cc1N[C@H](CC(=O)c1c2)c1cc(OC)ccc1	ED50	=	0.403619	uM	F	CELL-LINE	MCF7	297.31
O1c2c(OC1)cc1NC(CC(=O)c1c2)c1cc(OC)ccc1	ED50	=	0.13454	uM	F	CELL-LINE	MCF7	297.31
S1[C@@](CCCCCCCC)(C)C(OC(=O)CC)=CC1=O	IC50	=	75.7253	uM	F	CELL-LINE	MCF7	298.447
O1c2c(OC1)cc(cc2OC)\C=C/c1cc(N)c(OC)cc1	GI50	=	0.0157019	uM	F	CELL-LINE	MCF7	299.326
S1[C@@](CCCCCCCC)(C)C(=O)C(C(OC)=O)=C1[O-]	IC50	=	62.456	uM	F	CELL-LINE	MCF7	299.411
S1[C@@](CCCCCCCC)(C)C(OCC(=O)[O-])=CC1=O	IC50	=	46.0905	uM	F	CELL-LINE	MCF7	299.411
Fc1ccc(cc1)-c1nc(O)c2cc(OC)c(OC)cc2n1	ED50	=	65.9365	uM	F	CELL-LINE	MCF7	300.289
Fc1ccccc1-c1nc(O)c2cc(OC)c(OC)cc2n1	ED50	=	43.6246	uM	F	CELL-LINE	MCF7	300.289
O1c2c(OC1)cc(cc2OC)\C=C/c1cc(O)c(OC)cc1	GI50	=	0.0139855	uM	F	CELL-LINE	MCF7	300.31
S1[C@@](CCCCCCCC)(C)C(OC(OC)=O)=CC1=O	IC50	=	35.6169	uM	F	CELL-LINE	MCF7	300.419
S1[C@@](CCCCCC)(C)C(OCC(OCC)=O)=CC1=O	IC50	=	47.2673	uM	F	CELL-LINE	MCF7	300.419
Fc1ccccc1C1OC1C(=O)c1cc2OCOc2cc1N	ED50	=	7.63427	uM	F	CELL-LINE	MCF7	301.273
BrCc1cc2c(nc1)C(=O)c1c(cccc1)C2=O	IC50	=	8.24157	uM	F	CELL-LINE	MCF7	302.127
O(C)c1c2c(C(=O)C=CC2=O)c(OC)cc1\C=C\C(OC)=O	IC50	=	4.00288	uM	F	CELL-LINE	MCF7	302.282
O1c2c(C=CC1(C)C)c1nc(O)cc(c1cc2)-c1ccccc1	ED50	=	98.8921	uM	F	CELL-LINE	MCF7	303.361
ClCCCCOC1=CC(S[C@@]1(CCCCCC)C)=O	IC50	=	28.2076	uM	F	CELL-LINE	MCF7	304.882
O1c2c(OC1)cc1c(C(=O)N[C@@H]3C1=C[C@H](O)[C@@H](O)[C@H]3O)c2O	IC50	=	0.0618373	uM	F	CELL-LINE	MCF7	307.258
O1C(C1C(=O)c1cc2OCOc2cc1N)c1cc(OC)ccc1	ED50	=	3.51091	uM	F	CELL-LINE	MCF7	313.309
S1[C@@](CCCCCCCC)(C)C(OC(OCC)=O)=CC1=O	IC50	=	46.1128	uM	F	CELL-LINE	MCF7	314.446
O(C)c1c2c(C(=O)C=CC2=O)c(OC)cc1\C=C\C(OCC)=O	IC50	=	3.03501	uM	F	CELL-LINE	MCF7	316.309
O(C)c1cc(ccc1)C1Nc2c(cc(N3CCCC3)cc2)C(=O)C1	ED50	=	0.341183	uM	F	CELL-LINE	MCF7	322.408
S1[C@@](CCCCCCCC)(C)C(=O)C(CC=C)(CC=C)C1=O	IC50	=	125.576	uM	F	CELL-LINE	MCF7	322.513
Oc1c2c(C(=O)c3c(cccc3)C2=O)c(O)cc1\C=C\C(OC)=O	IC50	=	1.41849	uM	F	CELL-LINE	MCF7	324.288
O1c2c(OC1)cc1[C@@H]3[C@@H](NC(=O)c1c2O)[C@H](O)[C@H](O)[C@@H](O)[C@@H]3O	IC50	=	0.0983789	uM	F	CELL-LINE	MCF7	325.273
S1[C@@](CCCCCCCC)(C)C(OC(OCC=C)=O)=CC1=O	IC50	=	43.4973	uM	F	CELL-LINE	MCF7	326.457
Clc1cc(ccc1)C1Nc2c(cc(N3CCCC3)cc2)C(=O)C1	ED50	=	0.948514	uM	F	CELL-LINE	MCF7	326.827
S1[C@@](CCCCCC)(C)C(OCC(=O)NCC(=O)[O-])=CC1=O	IC50	=	20.0969	uM	F	CELL-LINE	MCF7	328.409
S1[C@@](CCCCCCCC)(C)C(OCC(OCC)=O)=CC1=O	IC50	=	32.8794	uM	F	CELL-LINE	MCF7	328.473
O1c2c(OC1)cc(cc2OC)\C=C/c1cc([N+](=O)[O-])c(OC)cc1	GI50	=	1.0932	uM	F	CELL-LINE	MCF7	329.308
O(C)c1cc2c(nc(nc2O)-c2cc3c(cc2)cccc3)cc1OC	ED50	=	19.858	uM	F	CELL-LINE	MCF7	332.359
ClCCCCOC1=CC(S[C@@]1(CCCCCCCC)C)=O	IC50	=	106.026	uM	F	CELL-LINE	MCF7	332.936
P(Oc1ccc(cc1)\C=C/c1cc(OC)cc(OC)c1)(=O)([O-])[O-]	GI50	=	2.1839	uM	F	CELL-LINE	MCF7	334.264
O=C1C=2N3C[C@@H]4[NH2+][C@@H]4[C@]3(OC)[C@@H](C=2C(=O)C(N)=C1C)COC(=O)N	IC50	=	1.34192	uM	F	CELL-LINE	MCF7	335.34
S1[C@@](CCCCCCCC)(C)C(=O)C(C(=O)C(F)(F)F)=C1[O-]	IC50	=	43.5708	uM	F	CELL-LINE	MCF7	337.382
O(CCCCCCCCCC)c1cc2[nH]c3c(c2cc1)ccnc3C	ED50	=	11.2262	uM	F	CELL-LINE	MCF7	338.495
S1[C@@](CCCCCCCC)(C)C(OCC(=O)NCC=C)=CC1=O	IC50	=	35.6406	uM	F	CELL-LINE	MCF7	339.5
O1c2c(C=CC1(C)C)c1N(C(OC(C)(C)C)=O)C(=O)C=C(c1cc2)C	ED50	=	7.02973	uM	F	CELL-LINE	MCF7	341.407
S1[C@@](CCCCCC)(C)C(OCC(=O)NCC(OC)=O)=CC1=O	IC50	=	28.5345	uM	F	CELL-LINE	MCF7	343.444
O(C)c1cc2[nH]c3c(c2cc1)ccnc3\C=C\c1ccc([N+](=O)[O-])cc1	ED50	=	3.47466	uM	F	CELL-LINE	MCF7	345.358
O(C)c1c2[nH+]ccc3N(C=Cc(cc1OC)c23)Cc1ccc(OC)cc1	ED50	=	22.8957	uM	F	CELL-LINE	MCF7	349.41
O(C)C1=C(C)C(=O)C=2N3C[C@@H]4[NH2+][C@@H]4[C@]3(OC)[C@@H](C=2C1=O)COC(=O)N	IC50	=	0.128443	uM	F	CELL-LINE	MCF7	350.351
O1c2c(OC1)cc(cc2OC)\C=C/c1cc(NC(=O)C[NH3+])c(OC)cc1	GI50	=	0.0391733	uM	F	CELL-LINE	MCF7	357.386
O=C1c2c(ncc(c2)COC(=O)Nc2ccccc2)C(=O)c2c1cccc2	IC50	=	12.7807	uM	F	CELL-LINE	MCF7	358.353
P(=O)([O-])([O-])c1cc(ccc1OC)\C=C\c1cc(OC)c2OCOc2c1	GI50	=	0.124215	uM	F	CELL-LINE	MCF7	362.274
S(C)C1=CC=C2c3c(cc(O)c(O)c3O)CC[C@H](NC(=O)C)C2=CC1=O	EC50	=	36.4192	uM	F	CELL-LINE	MCF7	373.429
O1C2(CCC(C)(C2(C)C)C1=O)C(Oc1cc2[nH]c3c(c2cc1)ccnc3C)=O	ED50	=	52.8502	uM	F	CELL-LINE	MCF7	378.428
[NH+]1(CCCCC1)CCCCNc1cc2c(c3c(c4c(cc3)cccc4)cc2)cc1	IC50	=	7.82148	uM	F	CELL-LINE	MCF7	383.559
O1c2c(OC1)cc(cc2OC)\C=C/c1cc(NC(=O)C([NH3+])CO)c(OC)cc1	GI50	=	0.0438809	uM	F	CELL-LINE	MCF7	387.412
BrCCCNC(=O)COC1=CC(S[C@@]1(CCCCCC)C)=O	IC50	=	17.0762	uM	F	CELL-LINE	MCF7	392.358
O1[C@H](CC(C)C)[C@@H](O)[C@H](OCCCCCCC)[C@@H](O)[C@H]1OCc1ccccc1	EC50	=	15.2071	uM	F	CELL-LINE	MCF7	394.552
O1c2c(OC1)cc(cc2OC)\C=C/c1cc(NC(=O)C([NH3+])C(C)C)c(OC)cc1	GI50	=	0.0926234	uM	F	CELL-LINE	MCF7	399.467
[NH+]1(CC[NH+](CC1)C)CCCCNc1cc2c(c3c(c4c(cc3)cccc4)cc2)cc1	IC50	=	30.2816	uM	F	CELL-LINE	MCF7	399.582
SCC([NH3+])C(=O)Nc1cc(ccc1OC)\C=C/c1cc(OC)c2OCOc2c1	GI50	=	0.123922	uM	F	CELL-LINE	MCF7	403.479
O1[C@H](CC(C)C)[C@@H](OC)[C@H](OCCCCCCC)[C@@H](O)[C@H]1OCc1ccccc1	EC50	=	17.1326	uM	F	CELL-LINE	MCF7	408.579
O(C)c1c2[n+](ccc3N(C=Cc(cc1OC)c23)Cc1ccccc1)Cc1ccccc1	ED50	=	0.659326	uM	F	CELL-LINE	MCF7	409.509
O=C(N1CCCCC1)CCC(=O)Nc1cc2c(c3c(c4c(cc3)cccc4)cc2)cc1	IC50	=	24.8467	uM	F	CELL-LINE	MCF7	410.517
O=C(N1CCCCC1)CCC(=O)Nc1c2c(c3c(c1)c1c(cc3)cccc1)cccc2	IC50	=	28.0135	uM	F	CELL-LINE	MCF7	410.517
O=C1C=2N3C[C@@H]4[NH2+][C@@H]4[C@]3(OC)[C@@H](C=2C(=O)C(Nc2ccccc2)=C1C)COC(=O)N	IC50	=	0.14583	uM	F	CELL-LINE	MCF7	411.438
O=C(N1CC[NH+](CC1)C)CCC(=O)Nc1cc2c(c3c(c4c(cc3)cccc4)cc2)cc1	IC50	=	22.9756	uM	F	CELL-LINE	MCF7	426.54
O=C1[C@@]2(O)CC(=C[C@H]3[C@H]4[C@@](OC(=O)\C(=C/C)\C)(C[C@@H](C)[C@]3(O)C2C=C1C)C4(C)C)CO	ED50	=	162.307	uM	F	CELL-LINE	MCF7	430.541
O(C)c1c2[n+](ccc3N(C=Cc(cc1OC)c23)Cc1ccc(OC)cc1)Cc1ccccc1	ED50	=	0.887301	uM	F	CELL-LINE	MCF7	439.535
O(C)c1cc(ccc1)[C@H]1Nc2c(cccc2)/C(=N/NC(=O)C(=O)NC(C)c2ccccc2)/C1	ED50	=	18.0783	uM	F	CELL-LINE	MCF7	442.519
O1c2c(OC1)cc(cc2OC)\C=C/c1cc(NC(=O)C([NH3+])Cc2ccccc2)c(OC)cc1	GI50	=	0.0983216	uM	F	CELL-LINE	MCF7	447.511
O1CC2=C(C=C3N(Cc4c3nc3c(cccc3)c4\C=N\NC(=O)C[NH3+])C2=O)[C@@](O)(CC)C1=O	IC50	=	0.891943	uM	F	CELL-LINE	MCF7	448.459
S(C)C1=CC=C2c3c(cc(O)c(O)c3O)CC[C@H](NC(=O)c3ccc(N)cc3)C2=CC1=O	EC50	=	32.8513	uM	F	CELL-LINE	MCF7	450.515
O(C)c1cc(ccc1OC)C(C(C)C)(CCC[NH+](CCc1cc(OC)c(OC)cc1)C)C#N	EC50	=	2.19482	uM	F	CELL-LINE	MCF7	455.619
O1CC2=C(C=C3N(Cc4c3nc3c(cccc3)c4\C=N\NC(=O)C([NH3+])C)C2=O)[C@@](O)(CC)C1=O	IC50	=	2.16223	uM	F	CELL-LINE	MCF7	462.486
O(C)c1cc2[C@@H]3[C@@H](NC(=O)c2cc1)[C@H](OC(=O)C)[C@H](OC(=O)C)[C@@H](OC(=O)C)[C@@H]3OC(=O)C	IC50	=	9.92579	uM	F	CELL-LINE	MCF7	463.439
O1c2c(OC1)cc(cc2OC)\C=C/c1cc(NC(=O)C([NH3+])Cc2ccc(O)cc2)c(OC)cc1	GI50	=	0.0755108	uM	F	CELL-LINE	MCF7	463.51
O1[C@@]2([C@@H]3OC1(O[C@]1(C4C=C(C)C(=O)[C@@]4(O)CC(=CC13)CO)[C@@H](C2)C)Cc1ccccc1)C(C)=C	ED50	=	66.4718	uM	F	CELL-LINE	MCF7	464.558
O(CC)C\C=C\c1ccc(cc1)-c1[nH]c(c(n1)-c1ccc(N(C)C)cc1)-c1ccc(N(C)C)cc1	ED50	=	0.0771491	uM	F	CELL-LINE	MCF7	466.629
S1CC(=O)N(n2c(nnc2S)COc2ccccc2)C1c1c[nH]nc1-c1ccc(F)cc1	IC50	=	64.0291	uM	F	CELL-LINE	MCF7	468.537
O=C1[C@@]2(O)CC(=C[C@H]3[C@H]4[C@@](OC(=O)\C(=C/C)\C)(C[C@@H](C)[C@]3(O)C2C=C1C)C4(C)C)COC(=O)C	ED50	=	88.3664	uM	F	CELL-LINE	MCF7	472.578
Fc1ccccc1[C@@H]1Nc2c(cc3OCOc3c2)/C(=N/NC(=O)C(=O)NC(C)c2ccccc2)/C1	ED50	=	52.6879	uM	F	CELL-LINE	MCF7	474.492
Fc1ccccc1[C@H]1Nc2c(cc3OCOc3c2)/C(=N/NC(=O)C(=O)NC(C)c2ccccc2)/C1	ED50	=	17.9139	uM	F	CELL-LINE	MCF7	474.492
O1CC2=C(C=C3N(Cc4c3nc3c(cccc3)c4\C=N\NC(=O)C([NH3+])CO)C2=O)[C@@](O)(CC)C1=O	IC50	=	2.08993	uM	F	CELL-LINE	MCF7	478.485
S1CC(=O)N(n2c(nnc2S)COc2ccccc2)C1c1c[nH]nc1-c1ccc(OC)cc1	IC50	=	176.872	uM	F	CELL-LINE	MCF7	480.573
S(C)C1=CC=C2c3c(cc(O)c(O)c3O)CC[C@H](NC(=O)c3cc(O)c(O)c(O)c3)C2=CC1=O	EC50	=	17.7871	uM	F	CELL-LINE	MCF7	483.497
O1[C@H](CC(C)C)[C@@H](O)[C@H](OCCCCCCC)[C@@H](OCc2ccccc2)[C@H]1OCc1ccccc1	EC50	=	12.3794	uM	F	CELL-LINE	MCF7	484.677
O1c2c(OC1)cc1N[C@@H](C\C(=N/NC(=O)C(=O)NC(C)c3ccccc3)\c1c2)c1cc(OC)ccc1	ED50	=	6.16614	uM	F	CELL-LINE	MCF7	486.528
O1c2c(OC1)cc1N[C@H](C\C(=N/NC(=O)C(=O)NC(C)c3ccccc3)\c1c2)c1cc(OC)ccc1	ED50	=	12.9489	uM	F	CELL-LINE	MCF7	486.528
O1c2c(OC1)cc(cc2OC)\C=C/c1cc(NC(=O)C([NH3+])Cc2c3c([nH]c2)cccc3)c(OC)cc1	GI50	=	0.719353	uM	F	CELL-LINE	MCF7	486.548
O1C[C@H]2O[C@H](OCc3ccccc3)[C@H](O)[C@@H](OCCCCCCC)[C@@H]2O[C@@H]1c1ccc(OC)cc1	EC50	=	5.13764	uM	F	CELL-LINE	MCF7	486.605
O1CC2=C(C=C3N(Cc4c3nc3c(cccc3)c4\C=N\NC(=O)C3[NH2+]CCC3)C2=O)[C@@](O)(CC)C1=O	IC50	=	1.63759	uM	F	CELL-LINE	MCF7	488.524
O1[C@@H](C(C)C)C(=O)N(C)[C@@H](Cc2ccccc2)[C@H](O)CC(O[C@H](CCCCCCC)[C@H](C)C1=O)=O	EC50	=	2.04226	uM	F	CELL-LINE	MCF7	489.653
S1CC(=O)N(n2c(nnc2S)COc2ccc(cc2)C)C1c1c[nH]nc1-c1ccc(OC)cc1	IC50	=	157.703	uM	F	CELL-LINE	MCF7	494.6
S1CC(=O)N(n2c(nnc2S)COc2ccccc2C)C1c1c[nH]nc1-c1ccc(OC)cc1	IC50	=	58.6332	uM	F	CELL-LINE	MCF7	494.6
O(C(C)C)C(=O)\C=C\c1ccc(cc1)-c1[nH]c(c(n1)-c1ccc(N(C)C)cc1)-c1ccc(N(C)C)cc1	ED50	=	0.303251	uM	F	CELL-LINE	MCF7	494.639
Clc1ccc(cc1)-c1n[nH]cc1C1SCC(=O)N1n1c(nnc1S)COc1ccccc1C	IC50	=	44.0865	uM	F	CELL-LINE	MCF7	499.019
O1CC2=C(C=C3N(Cc4c3nc3c(cccc3)c4\C=N\NC(=O)C([NH3+])CC(C)C)C2=O)[C@@](O)(CC)C1=O	IC50	=	0.297285	uM	F	CELL-LINE	MCF7	504.567
O=C1[C@@]2(O)CC(=C[C@H]3[C@H]4[C@@](OC(=O)Cc5ccccc5)(C[C@@H](C)[C@]3(O)C2C=C1C)C4(C)C)COC(=O)C	ED50	=	81.1229	uM	F	CELL-LINE	MCF7	508.611
O1C(C)C(O)C([NH3+])CC1O[C@@H]1c2c(C[C@](O)(C1)C(=O)C)c(O)c1c(C(=O)c3c(cccc3O)C1=O)c2O	IC50	=	0.0938763	uM	F	CELL-LINE	MCF7	514.507
O1[C@H](CC(C)C)[C@@H](OCc2ccc(OC)cc2)[C@H](OCCCCCCC)[C@@H](O)[C@H]1OCc1ccccc1	EC50	=	7.77147	uM	F	CELL-LINE	MCF7	514.703
P(Oc1ccc(cc1)\C=C/c1cc(OC)cc(OC)c1)(OCc1ccccc1)(OCc1ccccc1)=O	GI50	=	17.424	uM	F	CELL-LINE	MCF7	516.53
S(CCC([NH3+])C(=O)N\N=C\c1c2c(nc3c1cccc3)C=1N(C2)C(=O)C2=C(C=1)[C@@](O)(CC)C(OC2)=O)C	IC50	=	1.91349	uM	F	CELL-LINE	MCF7	522.606
Clc1ccc(cc1)-c1n[nH]cc1C1SCC(=O)N1n1c(nnc1S)COc1cc2c(cc1)cccc2	IC50	=	186.898	uM	F	CELL-LINE	MCF7	535.052
Clc1ccc(cc1)-c1n[nH]cc1C1SCC(=O)N1n1c(nnc1S)COc1c2c(ccc1)cccc2	IC50	=	186.898	uM	F	CELL-LINE	MCF7	535.052
O=C1[C@@]2(O)CC(CO)=C([C@H]3[C@H]4[C@@](OC(=O)CCCCCCC[C@H]5C[C@@H]5C)(C[C@@H](C)[C@]3(O)C2C=C1C)C4(C)C)C	ED50	=	4.23762	uM	F	CELL-LINE	MCF7	542.757
O1CC2=C(C=C3N(Cc4c3nc3c(cccc3)c4\C=N\NC(=O)C([NH3+])Cc3ccc(O)cc3)C2=O)[C@@](O)(CC)C1=O	IC50	=	9.01578	uM	F	CELL-LINE	MCF7	554.583
O1c2c(C(=O)C=C1c1ccc(O)cc1)c(O)cc(O)c2-c1cc(OC)ccc1C=1Oc2c(C(=O)C=1)c(O)cc(OC)c2	ED50	=	13.2388	uM	F	CELL-LINE	MCF7	566.518
O1[C@H](C=C(C[C@@H](O)CCCCCCCCCC[C@H]2O[C@@H](CC2)[C@@H](O)CCC(O)C(O)CCCCCCC)C1=O)C	ED50	=	27.2486	uM	F	CELL-LINE	MCF7	568.836
O1[C@H](C=O)[C@@H](OCc2ccc(OC)cc2)[C@H](OCCCCCCC)[C@@H](OCc2ccccc2)[C@H]1OCc1ccccc1	EC50	=	6.93565	uM	F	CELL-LINE	MCF7	576.73
O1[C@H](CO)[C@@H](OCc2ccc(OC)cc2)[C@H](OCCCCCCC)[C@@H](OCc2ccccc2)[C@H]1OCc1ccccc1	EC50	=	5.18362	uM	F	CELL-LINE	MCF7	578.746
O1[C@H](C=C(CCCCCCCC(=O)CCCC[C@@H](O)[C@@H]2O[C@H](CC2)[C@H](O)CCCCCCCCCCCC)C1=O)C	ED50	=	16.4111	uM	F	CELL-LINE	MCF7	578.875
O1[C@H](C=C(CCCCCCCC(=O)CCCC[C@H](O)[C@H]2O[C@H](CC2)[C@H](O)CCCCCCCCCCCC)C1=O)C	ED50	=	13.6472	uM	F	CELL-LINE	MCF7	578.875
O1[C@H](C=C(C[C@@H](O)CCCCCCCCCC[C@H]2O[C@@H](CC2)[C@H]2O[C@@H](CC2)[C@@H](O)CCCCCCCCC)C1=O)C	ED50	=	13.1289	uM	F	CELL-LINE	MCF7	578.875
O1[C@H](C=C(CCCCCCCCCCCC[C@@H]2O[C@H](CC2)[C@H](O)CCCCC(O)C(O)CCCCCCC)C1=O)C	ED50	=	18.0757	uM	F	CELL-LINE	MCF7	580.891
O1[C@H](C=C(CCCCCCCC(O)CC[C@@H](O)[C@@H]2O[C@H](CC2)[C@H](O)CCCCCCCCCCCCCC)C1=O)C	ED50	=	15.4934	uM	F	CELL-LINE	MCF7	580.891
[truncated: 60 more rows]

## Sheet: HepG2(5152)
mol	STANDARD_TYPE	RELATION	STANDARD_VALUE	STANDARD_UNITS	ASSAY_TYPE	TARGET_TYPE	CELL_NAME	Weight
[NH2+]=C(N(C)C)NC(=[NH2+])N	IC50	=	2250	uM	F	CELL-LINE	HepG2	131.183
Oc1c2c(cc(c1)C(=O)N(C)C)C(=O)c1c(C2=O)c(O)ccc1	IC50	=	2490	uM	F	CELL-LINE	HepG2	311.293
Oc1c2c(cc(c1)C(=O)N1CCCC1)C(=O)c1c(C2=O)c(O)ccc1	IC50	=	2320	uM	F	CELL-LINE	HepG2	337.331
O(C(=O)C)c1c2c(cc(c1)C(=O)N1CCCC1)C(=O)c1c(C2=O)c(OC(=O)C)ccc1	IC50	=	2540	uM	F	CELL-LINE	HepG2	421.405
O(C(=O)C)c1c2c(cc(c1)C(=O)NC1CCCC1)C(=O)c1c(C2=O)c(OC(=O)C)ccc1	IC50	=	2260	uM	F	CELL-LINE	HepG2	435.432
O(C(=O)C)c1c2c(cc(c1)C(OCc1ccc([N+](=O)[O-])cc1)=O)C(=O)c1c(C2=O)c(OC(=O)C)ccc1	IC50	=	2270	uM	F	CELL-LINE	HepG2	503.419
[Si](Oc1c2c(cc(c1)C(=O)NC1CCCC1)C(=O)c1c(C2=O)c(O[Si](C(C)(C)C)(C)C)ccc1)(C(C)(C)C)(C)C	IC50	=	2580	uM	F	CELL-LINE	HepG2	579.884
[Si](Oc1c2c(cc(c1)C(OCc1ccc([N+](=O)[O-])cc1)=O)C(=O)c1c(C2=O)c(O[Si](C(C)(C)C)(C)C)ccc1)(C(C)(C)C)(C)C	IC50	=	2530	uM	F	CELL-LINE	HepG2	647.871
P(CO)(CO)CO	IC50	=	98.71	uM	F	CELL-LINE	HepG2	124.076
FC1=CNC(=O)NC1=O	IC50	=	85	uM	F	CELL-LINE	HepG2	130.078
Sc1ncnc2nc[nH]c12	IC50	=	8	uM	F	CELL-LINE	HepG2	152.181
O=C1C=C(\C=C\C)[C@@H](O)[C@@H]1O	IC50	=	0.0668	uM	F	CELL-LINE	HepG2	154.165
O=C1C=CC(=O)c2c1cccc2	IC50	=	15.89	uM	F	CELL-LINE	HepG2	158.156
ClC=1SN(CC)C(=O)C=1	IC50	=	12	uM	F	CELL-LINE	HepG2	163.628
O1C(=O)[C@H]2[C@H]([C@H]3C=C[C@@H]2C3)C1=O	IC50	=	62	uM	F	CELL-LINE	HepG2	164.16
S=C=NCCc1ncccc1	IC50	=	15.31	uM	F	CELL-LINE	HepG2	164.232
O1C(=O)[C@H]2[C@H]([C@@H]3O[C@@H]2CC3)C1=O	IC50	=	74	uM	F	CELL-LINE	HepG2	168.148
O1[C@H]2[C@@H](CC1=O)[C@@H](C)[C@@](O)(C2)C	IC50	=	5.36	uM	F	CELL-LINE	HepG2	170.208
S(=O)(=O)(N)c1ccc(N)cc1	IC50	=	0.08	uM	F	CELL-LINE	HepG2	172.208
O=C1C=C(N)c2c(cccc2)C1=O	IC50	=	15.68	uM	F	CELL-LINE	HepG2	173.171
S(=O)(CCCCN=C=S)C	EC50	=	4	uM	F	CELL-LINE	HepG2	177.292
ClC=1SN(CC)C(=O)C=1C	IC50	=	9.1	uM	F	CELL-LINE	HepG2	177.655
[O-][n+]1c2c([n+]([O-])nc1N)cccc2	IC50	=	19.1	uM	F	CELL-LINE	HepG2	178.151
O(C(=O)C)c1ccccc1C(=O)[O-]	IC50	=	3841	uM	F	CELL-LINE	HepG2	179.151
[nH]1c2c(c3c1cccc3)ccnc2C	IC50	=	115	uM	F	CELL-LINE	HepG2	182.226
O=C(CC#N)c1c2c([nH]c1)cccc2	IC50	=	44.54	uM	F	CELL-LINE	HepG2	184.198
O[C@H]1CC[C@]2([C@@H](CC[NH2+]C2)[C@@H]1C)C	IC50	=	19	uM	F	CELL-LINE	HepG2	184.303
n1c2n(C=C(N=C2)C)cc1C(C)(C)C	IC50	=	992	uM	F	CELL-LINE	HepG2	189.262
S(=O)(C(C)C)CCCN=C=S	IC50	=	7.14	uM	F	CELL-LINE	HepG2	191.319
S(=O)(CCCCN=C=S)CC	IC50	=	5.35	uM	F	CELL-LINE	HepG2	191.319
O1c2c(cc(O)cc2)C(=O)CC1(C)C	IC50	=	480	uM	F	CELL-LINE	HepG2	192.214
O1C(=O)[C@]2([C@H]3O[C@H](CC3)[C@@]2(C)C1=O)C	IC50	=	11	uM	F	CELL-LINE	HepG2	196.202
O[C@H]1CC[C@]2([C@@H](CCCC2)C1(C)C)C	IC50	=	28	uM	F	CELL-LINE	HepG2	196.334
Oc1ccc(\N=C\c2ccccc2)cc1	IC50	=	108	uM	F	CELL-LINE	HepG2	197.237
Oc1cc2[nH]c3c(c2cc1C)cccc3	IC50	=	14.4	uM	F	CELL-LINE	HepG2	197.237
ClC=1C(=O)N(SC=1Cl)CC	IC50	=	12	uM	F	CELL-LINE	HepG2	198.073
O=C(CC#N)c1c2c(n(c1)C)cccc2	IC50	=	31.8	uM	F	CELL-LINE	HepG2	198.225
o1c2nc3c(cccc3)c(OC)c2cc1	IC50	=	55.2	uM	F	CELL-LINE	HepG2	199.209
[nH+]1c2c(CCCC2)c(N)c2c1cccc2	IC50	=	98.73	uM	F	CELL-LINE	HepG2	199.277
O1C(CC=CC1=O)\C=C\c1ccccc1	IC50	=	2.4	uM	F	CELL-LINE	HepG2	200.237
O1[C@H](CC=CC1=O)\C=C\c1ccccc1	IC50	=	1.6	uM	F	CELL-LINE	HepG2	200.237
n1(cccc1)C12CC3CC(C1)CC(C2)C3	IC50	=	38.6	uM	F	CELL-LINE	HepG2	201.313
Oc1c2c(C(=O)C=C(C)C2=O)c(O)cc1	IC50	=	2.34	uM	F	CELL-LINE	HepG2	204.181
O1C=CC(=O)C=C1C1(O)C=CC(=O)C=C1	IC50	=	1.76	uM	F	CELL-LINE	HepG2	204.181
[C@H]12[C@H]([C@H]3[C@H](CC[C@H]3C)C(CC1)=C)C2(C)C	IC50	=	20	uM	F	CELL-LINE	HepG2	204.357
S(=O)(C(C)C)CCCCN=C=S	IC50	=	2.05	uM	F	CELL-LINE	HepG2	205.346
S(=O)(CCCCN=C=S)CCC	IC50	=	3.91	uM	F	CELL-LINE	HepG2	205.346
ClC=1SN(CCCCC)C(=O)C=1	GI50	=	6.4	uM	F	CELL-LINE	HepG2	205.709
[O-][n+]1c2c([n+]([O-])nc1NCC)cccc2	IC50	=	13.5	uM	F	CELL-LINE	HepG2	206.205
O1c2c(cc(O)cc2)C(=O)CC1(CC)C	IC50	=	150	uM	F	CELL-LINE	HepG2	206.241
ClC=1S(=O)N(C(C)(C)C)C(=O)C=1	IC50	=	27	uM	F	CELL-LINE	HepG2	207.681
Oc1cc(ccc1O)\C=C\C(OCC)=O	GI50	=	17.21	uM	F	CELL-LINE	HepG2	208.213
O1C(=O)C(C)=C(OC)C=C1\C=C\C(=O)C	IC50	=	86	uM	F	CELL-LINE	HepG2	208.213
O1CC(=Nc2c1cccc2)c1ccccc1	IC50	=	87	uM	F	CELL-LINE	HepG2	209.248
n1c2n(cc1-c1ccc(cc1)C)C=CN=C2	IC50	=	103.9	uM	F	CELL-LINE	HepG2	209.252
Oc1cc2[nH]c3c(c2cc1C=O)cccc3	IC50	=	65.9	uM	F	CELL-LINE	HepG2	211.22
n1nnn(c1)C/C(=C/c1ccccc1)/C#N	IC50	=	5.83	uM	F	CELL-LINE	HepG2	211.228
P1(OCCCN1)(=O)Nc1ccccc1	IC50	=	0.6	uM	F	CELL-LINE	HepG2	212.189
O(C)c1cc2[nH]c3c(c2cc1)ccnc3C	IC50	=	46	uM	F	CELL-LINE	HepG2	212.252
Fc1ccc(cc1)-c1nc2n(c1)C=CN=C2	IC50	=	737	uM	F	CELL-LINE	HepG2	213.215
Oc1cc(ccc1O)\C=N\c1ccccc1	IC50	=	6.8	uM	F	CELL-LINE	HepG2	213.236
P(CCP(CO)CO)(CO)CO	IC50	=	71.71	uM	F	CELL-LINE	HepG2	214.138
[O-][n+]1c2c([n+]([O-])nc1NC1CC1)cccc2	IC50	=	13.3	uM	F	CELL-LINE	HepG2	218.216
O1c2c(cc(O)cc2)C(=O)CC12CCCC2	IC50	=	460	uM	F	CELL-LINE	HepG2	218.252
S(=O)(C(C)C)CCCCCN=C=S	IC50	=	3.69	uM	F	CELL-LINE	HepG2	219.373
S(=O)(CC(C)C)CCCCN=C=S	IC50	=	2.16	uM	F	CELL-LINE	HepG2	219.373
S(=O)(CCCCN=C=S)CCCC	IC50	=	5.93	uM	F	CELL-LINE	HepG2	219.373
Clc1snc(NCCC(OC)=O)c1	GI50	=	2	uM	F	CELL-LINE	HepG2	220.68
ClC=1SN(CCC(OC)=O)C(=O)C=1	GI50	=	10	uM	F	CELL-LINE	HepG2	221.664
OCCNc1[n+]([O-])c2c([n+]([O-])n1)cccc2	IC50	=	23.2	uM	F	CELL-LINE	HepG2	222.204
O1c2c(cccc2)C(=O)C=C1c1ccccc1	GI50	=	50.6	uM	F	CELL-LINE	HepG2	222.243
O(C(=O)c1cc2c3c([nH]c2cc1)cccc3)C	IC50	=	36.9	uM	F	CELL-LINE	HepG2	225.247
O(C)c1cc2[nH]c3c(cc(cc3)C=O)c2cc1	IC50	=	4.23	uM	F	CELL-LINE	HepG2	225.247
n1nnn(c1)C/C(=C/c1ccc(cc1)C)/C#N	IC50	=	6.56	uM	F	CELL-LINE	HepG2	225.255
OC\C=C(/Cc1ccccc1)\c1ncccc1	IC50	=	1600	uM	F	CELL-LINE	HepG2	225.291
[n+]1(cc2[nH]c3c(c2cc1)cccc3)CCCC	IC50	=	93.3254	uM	F	CELL-LINE	HepG2	225.315
[Se]=C(N\N=C\c1ccccc1)N	IC50	=	39.09	uM	F	CELL-LINE	HepG2	226.144
Oc1ccc(cc1-c1ccc(O)cc1)CC=C	IC50	=	89	uM	F	CELL-LINE	HepG2	226.275
Oc1cc2n(c3c(c2cc1)ccnc3C)CC	IC50	=	134.896	uM	F	CELL-LINE	HepG2	226.279
FC1=CN([C@H]2O[C@H](C=C2)CO)C(=O)N=C1N	EC50	=	0.017	uM	F	CELL-LINE	HepG2	227.195
P1(OCCCN1)(Oc1ccc(cc1)C)=O	IC50	=	0.59	uM	F	CELL-LINE	HepG2	227.2
Oc1cc(cc2c1[nH]c1c2cc(O)cc1)C=O	IC50	=	135	uM	F	CELL-LINE	HepG2	227.219
Oc1cc2[nH]c3cc(O)ccc3c2cc1C=O	IC50	=	32.8	uM	F	CELL-LINE	HepG2	227.219
Fc1ccc(cc1)-c1nc2n(C=C(N=C2)C)c1	IC50	=	106.6	uM	F	CELL-LINE	HepG2	227.242
OCCNC=1NC=CC=2C=1N=C1C=2C=CC=C1	IC50	=	130	uM	F	CELL-LINE	HepG2	227.267
[NH3+]CCNc1nccc2c1[nH]c1c2cccc1	IC50	=	30.6	uM	F	CELL-LINE	HepG2	227.291
FC1=CN([C@H]2O[C@H](C=C2)CO)C(=O)NC1=O	IC50	=	35.4	uM	F	CELL-LINE	HepG2	228.179
FC1=CN([C@H]2O[C@@H](C=C2)CO)C(=O)NC1=O	IC50	=	37.1	uM	F	CELL-LINE	HepG2	228.179
o1c(ccc1\C=C\c1ccccc1)C(=O)N[O-]	IC50	=	12.78	uM	F	CELL-LINE	HepG2	228.227
Oc1c(cc(cc1C)\C=C/1\C(=O)C=CC\1=O)C	EC50	=	2.07	uM	F	CELL-LINE	HepG2	228.247
Oc1cc(cc(O)c1)\C=C\c1ccc(O)cc1	IC50	=	50	uM	F	CELL-LINE	HepG2	228.247
Oc1cc(cc(O)c1)\C=C\c1cc(O)ccc1	IC50	=	95.8	uM	F	CELL-LINE	HepG2	228.247
O1[C@H](CCC)[C@@H](O)C\C=C\CC[C@@H](O)C1=O	IC50	=	9.1	uM	F	CELL-LINE	HepG2	228.288
O1c2c(cccc2)C(=O)C=C1C1CCCCC1	IC50	=	2.9	uM	F	CELL-LINE	HepG2	228.291
O=C1N2[C@@H](C\C(\C2)=C/C)CNc2c1cccc2	IC50	=	68.9	uM	F	CELL-LINE	HepG2	228.295
Oc1cc(ccc1O)\C=N\c1ccc(O)cc1	IC50	=	5.6	uM	F	CELL-LINE	HepG2	229.235
S1C[C@H](O[C@H]1CO)N1C=CC(=NC1=O)N	EC50	=	0.4	uM	F	CELL-LINE	HepG2	229.26
FC1=CN([C@@H]2O[C@@H](C=C2)CO)C(=O)NC1O	IC50	=	59.3	uM	F	CELL-LINE	HepG2	230.195
O=C1c2cc(ccc2NC1=O)\C=C\C(OC)=O	IC50	=	0.37	uM	F	CELL-LINE	HepG2	231.207
O=C1N(Cc2ccccc2)C(=O)C2[NH2+]C1CC2	IC50	=	92	uM	F	CELL-LINE	HepG2	231.275
S(=O)(CCCCN=C=S)C1CCCC1	IC50	=	3.64	uM	F	CELL-LINE	HepG2	231.384
O1c2c(cc(O)cc2)C(=O)CC12CCCCC2	IC50	=	190	uM	F	CELL-LINE	HepG2	232.279
O(C)c1cc2c([nH]cc2CCNC(=O)C)cc1	IC50	=	271	uM	F	CELL-LINE	HepG2	232.283
S(=O)(C(C)C)CCCCCCN=C=S	IC50	=	7.82	uM	F	CELL-LINE	HepG2	233.4
ClC=1SN(CCCC(OC)=O)C(=O)C=1	GI50	=	7	uM	F	CELL-LINE	HepG2	235.691
ClC=1SN(CCC(OC)=O)C(=O)C=1C	IC50	=	8.6	uM	F	CELL-LINE	HepG2	235.691
[NH2+]1CC[NH+](CC1)CCNC(=[NH2+])c1ccncc1	IC50	=	191.16	uM	F	CELL-LINE	HepG2	236.343
O1CC[NH+](CC1)CCNC(=[NH2+])c1nccnc1	IC50	=	9.4	uM	F	CELL-LINE	HepG2	237.307
S(Cc1ccccc1)CCCCN=C=S	IC50	=	12.56	uM	F	CELL-LINE	HepG2	237.391
n1ccc2c(n(c3c2cccc3)CCCC)c1C	IC50	=	145	uM	F	CELL-LINE	HepG2	238.334
P1(=O)(NCC(CN1)(C)C)Nc1ccccc1	IC50	=	3.17	uM	F	CELL-LINE	HepG2	239.259
O=C1C=C(\N=C/2\CCCC\2)c2c(cccc2)C1=O	IC50	=	7.77	uM	F	CELL-LINE	HepG2	239.274
S(=O)(Cc1ccccc1)CCCN=C=S	IC50	=	9.84	uM	F	CELL-LINE	HepG2	239.363
S(=O)(CCCCN=C=S)c1ccccc1	IC50	=	6.34	uM	F	CELL-LINE	HepG2	239.363
Oc1cc(cc2c1[nH]c1c2cccc1)C(OC)=O	IC50	=	15.8	uM	F	CELL-LINE	HepG2	241.246
O(C)c1cc2[nH]c3cc(O)c(cc3c2cc1)C=O	IC50	=	28.6	uM	F	CELL-LINE	HepG2	241.246
O(C)c1ccc(cc1)\C=C(/C#N)\Cn1nnnc1	IC50	=	27.39	uM	F	CELL-LINE	HepG2	241.254
Fc1cc2N=C(COc2cc1)c1ccc(cc1)C	IC50	=	100	uM	F	CELL-LINE	HepG2	241.265
[Se]=C(NNC(=O)c1ccccc1)N	IC50	=	34.82	uM	F	CELL-LINE	HepG2	242.143
P1(OCCCN1)(=O)Nc1ccc(OC)cc1	IC50	=	0.06	uM	F	CELL-LINE	HepG2	242.215
O=C1C2=C(C[C@@H]3[C@@](C2)(C[C@H]2C[C@]23C)C)C(=O)C=C1	IC50	=	148.6	uM	F	CELL-LINE	HepG2	242.318
O1[C@H](CO)[C@@H](O)[C@H](O)[C@@H]1N1C=CC(=NC1=O)N	IC50	=	0.2	uM	F	CELL-LINE	HepG2	243.219
Fc1ccc(cc1)\C=C(/C#N)\Cn1nnnc1C	IC50	=	7.29	uM	F	CELL-LINE	HepG2	243.245
n1(cccc1)-c1c2c(c3c(c1)cccc3)cccc2	IC50	=	13.4	uM	F	CELL-LINE	HepG2	243.309
S(=O)(Cc1occc1)CCCCN=C=S	IC50	=	3.86	uM	F	CELL-LINE	HepG2	243.351
Clc1cc2N=C(COc2cc1)c1ccccc1	IC50	=	78	uM	F	CELL-LINE	HepG2	243.693
o1c(ccc1\C=C\c1ccccc1O)C(=O)N[O-]	IC50	=	54.03	uM	F	CELL-LINE	HepG2	244.226
o1c(ccc1\C=C\c1ccc(O)cc1)C(=O)N[O-]	IC50	=	20.92	uM	F	CELL-LINE	HepG2	244.226
O(C(=O)/C(=C/c1ccccc1)/Cn1nnnc1)C	IC50	=	10.73	uM	F	CELL-LINE	HepG2	244.254
O1[C@H]2c3c(occ3C)C\C(=C/CCC(=C2)C1=O)\C	EC50	=	98	uM	F	CELL-LINE	HepG2	244.29
S(=O)(=O)(N[N-]C(=S)N)c1ccc(cc1)C	IC50	=	8.98	uM	F	CELL-LINE	HepG2	244.319
O=C1c2cc(ccc2N(C)C1=O)\C=C\C(OC)=O	IC50	=	0.53	uM	F	CELL-LINE	HepG2	245.234
s1c2c(nccc2Oc2ccc(F)cc2)cc1	GI50	=	45.1	uM	F	CELL-LINE	HepG2	245.277
s1c2c(nccc2Oc2cc(F)ccc2)cc1	GI50	=	42.65	uM	F	CELL-LINE	HepG2	245.277
s1c2c(nccc2Oc2ccccc2F)cc1	GI50	=	16.43	uM	F	CELL-LINE	HepG2	245.277
n1c2c(ccc1)c(-n1cccc1)cc1c2nccc1	IC50	=	3	uM	F	CELL-LINE	HepG2	245.285
s1c2c([nH+]ccc2Nc2ccc(F)cc2)cc1	GI50	=	26.26	uM	F	CELL-LINE	HepG2	245.301
s1c2c([nH+]ccc2Nc2cc(F)ccc2)cc1	GI50	=	32.02	uM	F	CELL-LINE	HepG2	245.301
s1c2c([nH+]ccc2Nc2ccccc2F)cc1	GI50	=	25.8	uM	F	CELL-LINE	HepG2	245.301
FC1=CN([C@@H]2O[C@H](CO)[C@@H](O)C2)C(=O)NC1=O	EC50	=	18.84	uM	F	CELL-LINE	HepG2	246.194
O=C1c2cc(N)ccc2-c2nccc3c2c1ccc3	IC50	=	19.68	uM	F	CELL-LINE	HepG2	246.269
O1[C@]2(O)C(=C[C@@H]3[C@@](C2)(C=CCC3=C)C)C(C)C1=O	EC50	=	42.4	uM	F	CELL-LINE	HepG2	246.306
O1c2c(cc(O)cc2)C(=O)CC12CCCCCC2	IC50	=	1450	uM	F	CELL-LINE	HepG2	246.306
[nH]1c2c(c3c1cccc3)c(c1c(ccnc1)c2C)C	GI50	=	2.9	uM	F	CELL-LINE	HepG2	246.313
S1C[C@H](O[C@H]1CO)N1C=C(F)C(=NC1=O)N	IC50	=	27.7	uM	F	CELL-LINE	HepG2	247.25
[nH]1nc(Nc2ccccc2)c2Cc3c(-c12)cccc3	IC50	=	24.2	uM	F	CELL-LINE	HepG2	247.301
O1C2=CC(=O)c3ncccc3C2=Nc2c1cccc2	IC50	=	0.05	uM	F	CELL-LINE	HepG2	248.241
O1c2c(cc(O)cc2)/C(=N/[N-]C(=O)N)/CC1(C)C	IC50	=	120	uM	F	CELL-LINE	HepG2	248.262
O1C(=O)C(C)=C(OC)C=C1\C=C\C(=C\C(=O)C)\C	IC50	=	81	uM	F	CELL-LINE	HepG2	248.278
Clc1cc2c(OC(=CC2=O)C2CCCC2)cc1	IC50	=	13.4	uM	F	CELL-LINE	HepG2	248.709
O=C(Nc1ccccc1C)CCCCC(=O)N[O-]	IC50	=	83.7	uM	F	CELL-LINE	HepG2	249.29
O=C(Nc1cc(ccc1)C)CCCCC(=O)N[O-]	IC50	=	5.2	uM	F	CELL-LINE	HepG2	249.29
O=C(Nc1ccc(cc1)C)CCCCC(=O)N[O-]	IC50	=	7.1	uM	F	CELL-LINE	HepG2	249.29
ClC=1SN(CCCCC(OC)=O)C(=O)C=1	GI50	=	8	uM	F	CELL-LINE	HepG2	249.718
O1\C(=C/CN2C=NC(=NC2=O)N)\C([O-])=C(O)C1=O	IC50	=	23.5	uM	F	CELL-LINE	HepG2	251.178
S(CC(=O)NN)c1oc(nn1)-c1ccncc1	IC50	=	3.26	uM	F	CELL-LINE	HepG2	251.27
O1c2c(ccc(c2)C)C(=O)C=C1c1ccc(N)cc1	IC50	=	40.5	uM	F	CELL-LINE	HepG2	251.285
O1c2c(cc(cc2)C)C(=O)C=C1c1ccc(N)cc1	IC50	=	21.3	uM	F	CELL-LINE	HepG2	251.285
O=C1N=C2N(C=C1Cc1ccccc1)C=CC=C2N	IC50	=	131	uM	F	CELL-LINE	HepG2	251.289
O(C(CNC(=O)CCC)C)c1cc(OC)ccc1	IC50	=	226.4	uM	F	CELL-LINE	HepG2	251.326
O(C)c1cc(O[C@@H](CNC(=O)CCC)C)ccc1	IC50	=	182.9	uM	F	CELL-LINE	HepG2	251.326
Fc1ccc(cc1)-c1nc2n(C=C(N=C2)C)c1C#N	IC50	=	99.5	uM	F	CELL-LINE	HepG2	252.252
ClCC(=O)N1N=C(CC1c1ccccc1O)C	IC50	=	47.92	uM	F	CELL-LINE	HepG2	252.701
O=C1C=C(\N=C/2\CCCCC\2)c2c(cccc2)C1=O	IC50	=	7.37	uM	F	CELL-LINE	HepG2	253.301
S(=O)(Cc1ccccc1)CCCCN=C=S	IC50	=	2.85	uM	F	CELL-LINE	HepG2	253.39
Brc1n2c(nc1C(C)(C)C)C=NC=C2	IC50	=	190	uM	F	CELL-LINE	HepG2	254.131
O1c2c(cccc2)C(=O)C=C1C1(O)C=CC(=O)C=C1	IC50	=	6.73	uM	F	CELL-LINE	HepG2	254.241
Oc1c2c(cc(c1)C)C(=O)c1c(C2=O)c(O)ccc1	IC50	=	64.4	uM	F	CELL-LINE	HepG2	254.241
[O-][n+]1c2c([n+]([O-])nc1Nc1ccccc1)cccc2	IC50	=	15	uM	F	CELL-LINE	HepG2	254.249
Oc1cc(ccc1)-c1nc2c(nc(nc2N)N)nc1	IC50	=	0.82	uM	F	CELL-LINE	HepG2	254.253
P1(Oc2ccc(cc2)C)(=O)NCC(CN1)(C)C	IC50	=	2.2	uM	F	CELL-LINE	HepG2	254.27
Oc1cc2n(c3c(c2cc1)ccnc3C)CCCC	IC50	=	81.2831	uM	F	CELL-LINE	HepG2	254.333
Oc1cc2n(c3c(c2cc1)ccnc3C)CC(C)C	IC50	=	114.815	uM	F	CELL-LINE	HepG2	254.333
O(CC)c1cc2n(c3c(c2cc1)ccnc3C)CC	IC50	=	69.1831	uM	F	CELL-LINE	HepG2	254.333
S(=O)(Cc1ncccc1)CCCCN=C=S	IC50	=	5.35	uM	F	CELL-LINE	HepG2	254.378
Oc1ccc(cc1-c1cc([N+](=O)[O-])ccc1)CC=C	IC50	=	62.3	uM	F	CELL-LINE	HepG2	255.273
O(C)c1cc2[nH]c3cc(OC)ccc3c2cc1C=O	IC50	=	102.2	uM	F	CELL-LINE	HepG2	255.273
O=C(NCC[NH3+])c1nccc2c1[nH]c1c2cccc1	IC50	=	122	uM	F	CELL-LINE	HepG2	255.301
ClC=1C(=O)N(SC=1Cl)CCC(OC)=O	IC50	=	16	uM	F	CELL-LINE	HepG2	256.109
[Se]=C(N\N=C\c1ccc(OC)cc1)N	IC50	=	11.32	uM	F	CELL-LINE	HepG2	256.17
O=C1N(NC(=O)CC#N)C(=Nc2c1cc(cc2)C)C	IC50	=	55	uM	F	CELL-LINE	HepG2	256.265
O1c2c(cc(cc2)C(C)C)C(=O)C=C1C1CCCC1	IC50	=	8.6	uM	F	CELL-LINE	HepG2	256.345
P1(OCCCN1)(=O)Nc1ccc([N+](=O)[O-])cc1	IC50	=	0.15	uM	F	CELL-LINE	HepG2	257.186
FC=1[C@@H](N2C=CC(=NC2=O)N)[C@H](O)[C@H](O)C=1CO	IC50	=	0.79	uM	F	CELL-LINE	HepG2	257.221
s1c2c(nccc2Oc2ccc(OC)cc2)cc1	GI50	=	53.24	uM	F	CELL-LINE	HepG2	257.313
s1c2c(nccc2Oc2cc(OC)ccc2)cc1	GI50	=	2.7	uM	F	CELL-LINE	HepG2	257.313
s1c2c(nccc2Oc2ccccc2OC)cc1	GI50	=	62.68	uM	F	CELL-LINE	HepG2	257.313
[NH3+]CCCCn1c2ncnc(-n3cccc3)c2nc1	IC50	=	74.16	uM	F	CELL-LINE	HepG2	257.321
s1c2c([nH+]ccc2Nc2ccc(OC)cc2)cc1	GI50	=	22.08	uM	F	CELL-LINE	HepG2	257.337
s1c2c([nH+]ccc2Nc2cc(OC)ccc2)cc1	GI50	=	5.02	uM	F	CELL-LINE	HepG2	257.337
s1c2c([nH+]ccc2Nc2ccccc2OC)cc1	GI50	=	18	uM	F	CELL-LINE	HepG2	257.337
Clc1ccc(cc1)C1=Nc2cc(ccc2OC1)C	IC50	=	87	uM	F	CELL-LINE	HepG2	257.72
Clc1cc2OCC(=Nc2cc1)c1ccc(cc1)C	IC50	=	10	uM	F	CELL-LINE	HepG2	257.72
O=C1[C@H](O)[C@@H](O)[C@@H](OCCC)C=C1COC(=O)C	IC50	=	33.6	uM	F	CELL-LINE	HepG2	258.27
O(C(=O)/C(=C/c1ccc(cc1)C)/Cn1nnnc1)C	IC50	=	10.73	uM	F	CELL-LINE	HepG2	258.281
O(C)c1c2NC[C@H]3N(C/C(/C3)=C/C)C(=O)c2ccc1	IC50	=	10.6	uM	F	CELL-LINE	HepG2	258.321
O=C1c2cc(ccc2N(CC)C1=O)\C=C\C(OC)=O	IC50	=	0.4	uM	F	CELL-LINE	HepG2	259.261
s1c2nc(ccc2c(N)c1C(=O)N)-c1occc1	IC50	=	1.97	uM	F	CELL-LINE	HepG2	259.289
[n+]1(cc2[nH]c3c(c2cc1)cccc3)Cc1ccccc1	IC50	=	77.6247	uM	F	CELL-LINE	HepG2	259.332
s1cccc1CS(=O)CCCCN=C=S	IC50	=	3.82	uM	F	CELL-LINE	HepG2	259.418
O1[C@@H]2[C@@H]3O[C@]3(CC\C=C(/Cc3occ(c23)C)\C)C1=O	EC50	=	167	uM	F	CELL-LINE	HepG2	260.289
O=C1C=C(Nc2c1c1c([nH]cc1)cc2)c1ccccc1	IC50	=	8	uM	F	CELL-LINE	HepG2	260.296
[O-][n+]1c2c([n+]([O-])nc1NC1CCCCC1)cccc2	IC50	=	9.5	uM	F	CELL-LINE	HepG2	260.297
[Se]=C(N\N=C\c1ccc(Cl)cc1)N	IC50	=	12.97	uM	F	CELL-LINE	HepG2	260.589
ClCCN(P1(OCCCN1)=O)CCCl	IC50	=	0.24	uM	F	CELL-LINE	HepG2	261.089
O=C1C=C(\N=C/c2ccccc2)c2c(cccc2)C1=O	IC50	=	11.47	uM	F	CELL-LINE	HepG2	261.28
S(=O)([O-])(=NC(=O)c1cccnc1)c1ccccc1	IC50	=	10.4	uM	F	CELL-LINE	HepG2	261.281
S(=O)([O-])(=NC(=O)c1ncccc1)c1ccccc1	IC50	=	9.9	uM	F	CELL-LINE	HepG2	261.281
O[C@H]1C[C@H](n2c3ncnc(N)c3nc2)C(=C)[C@@H]1CO	EC50	=	0.128	uM	F	CELL-LINE	HepG2	261.285
n1nnn(c1)C/C(=C/c1c2c(ccc1)cccc2)/C#N	IC50	=	7.11	uM	F	CELL-LINE	HepG2	261.288
N=1c2c(cccc2)C(C)(C)C=1\C=C\c1cc(ccc1)C	IC50	=	10.22	uM	F	CELL-LINE	HepG2	261.368
N=1c2c(cccc2)C(C)(C)C=1\C=C\c1ccc(cc1)C	IC50	=	43.85	uM	F	CELL-LINE	HepG2	261.368
Fc1ccc(cc1)\C=C(/Cn1nnnc1)\C(OC)=O	IC50	=	12.07	uM	F	CELL-LINE	HepG2	262.244
O1c2c(cc(O)cc2)/C(=N/[N-]C(=O)N)/CC1(CC)C	IC50	=	60	uM	F	CELL-LINE	HepG2	262.289
O(CC(C)C)c1cc(N)cc2[nH]c(cc12)C(OC)=O	IC50	=	68.89	uM	F	CELL-LINE	HepG2	262.309
Clc1cc2c(OC(=CC2=O)C2CCCCC2)cc1	IC50	=	20	uM	F	CELL-LINE	HepG2	262.736
O(C(C)C)c1cc(OC)cc2[nH]c(cc12)C(OC)=O	IC50	=	3.8	uM	F	CELL-LINE	HepG2	263.293
O=C(Nc1ccccc1)CCCCCCC(=O)N[O-]	IC50	=	0.0006	uM	F	CELL-LINE	HepG2	263.317
O=C(Nc1ccccc1CC)CCCCC(=O)N[O-]	IC50	=	51	uM	F	CELL-LINE	HepG2	263.317
O=C(Nc1cc(ccc1)CC)CCCCC(=O)N[O-]	IC50	=	4.8	uM	F	CELL-LINE	HepG2	263.317
O=C(Nc1ccc(cc1)CC)CCCCC(=O)N[O-]	IC50	=	5	uM	F	CELL-LINE	HepG2	263.317
O=C(Nc1cccc(C)c1C)CCCCC(=O)N[O-]	IC50	=	44.6	uM	F	CELL-LINE	HepG2	263.317
O=C(Nc1ccc(cc1C)C)CCCCC(=O)N[O-]	IC50	=	28.7	uM	F	CELL-LINE	HepG2	263.317
O=C(Nc1cc(ccc1C)C)CCCCC(=O)N[O-]	IC50	=	45.2	uM	F	CELL-LINE	HepG2	263.317
O=C(Nc1cc(C)c(cc1)C)CCCCC(=O)N[O-]	IC50	=	6.8	uM	F	CELL-LINE	HepG2	263.317
O=C(Nc1cc(cc(c1)C)C)CCCCC(=O)N[O-]	IC50	=	7.4	uM	F	CELL-LINE	HepG2	263.317
ClC=1SN(CCCCCC(OC)=O)C(=O)C=1	GI50	=	9.4	uM	F	CELL-LINE	HepG2	263.745
O=C(N)c1ccccc1NC(=O)C#Cc1ccccc1	IC50	=	5.9	uM	F	CELL-LINE	HepG2	264.284
S1C2=CC(=O)c3ncccc3C2=Nc2c1cccc2	IC50	=	0.11	uM	F	CELL-LINE	HepG2	264.308
O1c2c(cc(cc2)C(C)C)C(=O)C=C1c1ccccc1	IC50	=	6.4	uM	F	CELL-LINE	HepG2	264.324
O1c2c(ccc3c2cccc3)C(=O)C=C1C1CCCC1	IC50	=	6.1	uM	F	CELL-LINE	HepG2	264.324
S=C(N)[N-]\N=C\1/CC(Oc2c/1cc(O)cc2)(C)C	IC50	=	140	uM	F	CELL-LINE	HepG2	264.329
O1[C@H](CO)[C@@H](O)[C@@H](O)[C@@H]1n1c2ncnc(c2cc1)C	IC50	=	0.06	uM	F	CELL-LINE	HepG2	265.269
Oc1nc(nc2n(cnc12)[C@@H]1C[C@H](CO)[C@@H](O)C1)N	EC50	=	0.05	uM	F	CELL-LINE	HepG2	265.273
O(C)c1ccc(NC(=O)CCCCC(=O)N[O-])cc1	IC50	=	9.9	uM	F	CELL-LINE	HepG2	265.289
O1c2c3-c4c(C[C@H]5[NH2+]CCc(c35)cc2OC1)cccc4	IC50	=	20.8	uM	F	CELL-LINE	HepG2	266.32
s1cccc1-c1nc2c(c3c([nH]cc3)cc2)c(O)c1	IC50	=	10	uM	F	CELL-LINE	HepG2	266.324
O1[C@H]2OC=C([C@H]3[C@@]24OO[C@]1(CC[C@H]4[C@@H](CC3)C)C)C	IC50	=	200	uM	F	CELL-LINE	HepG2	266.337
Oc1ccc(cc1-c1cc(CC=C)c(O)cc1)CC=C	IC50	=	16.5	uM	F	CELL-LINE	HepG2	266.34
O=Cc1nc(c2n(c3c(c2c1)cccc3)CCCC)C	IC50	=	144.544	uM	F	CELL-LINE	HepG2	266.344
O1c2c(cccc2)C(=O)C=C1c1cc([N+](=O)[O-])ccc1	GI50	=	94.9	uM	F	CELL-LINE	HepG2	267.24
O1c2c(cccc2)C(=O)C=C1c1ccc([N+](=O)[O-])cc1	GI50	=	22.1	uM	F	CELL-LINE	HepG2	267.24
O(CC)C(=O)Nc1cc2nc3c(nc2cc1)cccc3	IC50	=	15.21	uM	F	CELL-LINE	HepG2	267.288
S(=O)(Cc1ccccc1)CCCCCN=C=S	IC50	=	3.91	uM	F	CELL-LINE	HepG2	267.417
S(=O)(CCc1ccccc1)CCCCN=C=S	IC50	=	6.97	uM	F	CELL-LINE	HepG2	267.417
Brc1n2C=C(N=Cc2nc1C(C)(C)C)C	IC50	=	123	uM	F	CELL-LINE	HepG2	268.158
O1c2c(cccc2)C(=O)C=C1C1(OC)C=CC(=O)C=C1	IC50	=	40.86	uM	F	CELL-LINE	HepG2	268.268
O1C=C(C(=O)c2c1cc(O)cc2)c1ccc(OC)cc1	IC50	=	60.5	uM	F	CELL-LINE	HepG2	268.268
[O-][n+]1c2c([n+]([O-])nc1Nc1ccc(cc1)C)cccc2	IC50	=	10.6	uM	F	CELL-LINE	HepG2	268.276
[O-][n+]1c2c([n+]([O-])nc1NCc1ccccc1)cccc2	IC50	=	8.2	uM	F	CELL-LINE	HepG2	268.276
O(C)c1ccc(cc1)-c1cc(C(C=C)(C)C)c(O)cc1	IC50	=	91	uM	F	CELL-LINE	HepG2	268.356
OCc1nc(c2n(c3c(c2c1)cccc3)CCCC)C	IC50	=	128.825	uM	F	CELL-LINE	HepG2	268.36
O(C(C)C)c1cc2n(c3c(c2cc1)ccnc3C)CC	IC50	=	52.6	uM	F	CELL-LINE	HepG2	268.36
[NH+]1(CCCCC1)C(CCCC(CCCC(C)C)C)C	IC50	=	30	uM	F	CELL-LINE	HepG2	268.509
F[C@@H]1[C@H](O)[C@H](O[C@H]1n1c2ncnc(N)c2nc1)CO	EC50	=	1.5	uM	F	CELL-LINE	HepG2	269.236
O1C2=C(CCOc3c2cccc3)c2[nH]nc(N)c2C1=O	IC50	=	80	uM	F	CELL-LINE	HepG2	269.26
[O-][n+]1c2c([n+]([O-])nc1Nc1ccccc1N)cccc2	IC50	=	17.4	uM	F	CELL-LINE	HepG2	269.264
O=C(N[O-])\C=C\c1nnn(c1)C\C=C\c1ccccc1	GI50	=	3.2	uM	F	CELL-LINE	HepG2	269.284
S(=O)(=O)(Cc1ccccc1)CCCCN=C=S	IC50	=	8.49	uM	F	CELL-LINE	HepG2	269.389
F[C@@H]1[C@H](O)[C@H](O[C@H]1n1c2ncnc(O)c2nc1)CO	EC50	=	8	uM	F	CELL-LINE	HepG2	270.22
Oc1c2c(cc(c1)C)C(=O)c1c(C2=O)c(O)cc(O)c1	IC50	=	55.1	uM	F	CELL-LINE	HepG2	270.24
O1c2c(C(=O)C=C1C1(O)C=CC(=O)C=C1)c(O)ccc2	IC50	=	4.96	uM	F	CELL-LINE	HepG2	270.24
Oc1c2c(cc(c1)CO)C(=O)c1c(C2=O)c(O)ccc1	IC50	=	10	uM	F	CELL-LINE	HepG2	270.24
O1c2c(c(O)c(O)c(O)c2)C(=O)C=C1c1ccccc1	IC50	=	28.3	uM	F	CELL-LINE	HepG2	270.24
O(C)c1cc2[nH]c3cc(OC)ccc3c2cc1C(=O)[O-]	IC50	=	24.4	uM	F	CELL-LINE	HepG2	270.264
O(C)c1cc(O)ccc1C(=O)\C=C\c1ccc(O)cc1	IC50	=	7.37	uM	F	CELL-LINE	HepG2	270.284
s1c2c(nc1C)C(=O)C(Nc1ccccc1)=CC2=O	IC50	=	0.0013	uM	F	CELL-LINE	HepG2	270.312
s1c2nc(ccc2c(N)c1C(=O)N)-c1cccnc1	IC50	=	4.76	uM	F	CELL-LINE	HepG2	270.316
S(Cc1ccccc1)c1oc(nn1)-c1nccnc1	IC50	=	11.21	uM	F	CELL-LINE	HepG2	270.316
N1C=CC=2C(N=C3C=2C=CC=C3)=C1\C=C\c1ccccc1	IC50	=	171	uM	F	CELL-LINE	HepG2	270.335
O1c2c(cc(cc2)C(C)C)C(=O)C=C1C1CCCCC1	IC50	=	18	uM	F	CELL-LINE	HepG2	270.372
Clc1ccccc1C=1Oc2c(ccc(c2)C)C(=O)C=1	IC50	=	28.3	uM	F	CELL-LINE	HepG2	270.715
Clc1ccc(cc1)C=1Oc2c(ccc(c2)C)C(=O)C=1	IC50	=	6.83	uM	F	CELL-LINE	HepG2	270.715
Clc1ccccc1C=1Oc2c(cc(cc2)C)C(=O)C=1	IC50	=	6.23	uM	F	CELL-LINE	HepG2	270.715
P(=O)([O-])([O-])COCCn1c2ncnc(N)c2nc1	EC50	=	2	uM	F	CELL-LINE	HepG2	271.173
o1c(ccc1\C=C\c1ccc(N(C)C)cc1)C(=O)N[O-]	IC50	=	31.69	uM	F	CELL-LINE	HepG2	271.296
S1CC(=O)N=C1Nc1ccc(S(=O)(=O)N)cc1	IC50	=	30	uM	F	CELL-LINE	HepG2	271.321
o1c(ccc1\C=C\c1cc2OCOc2cc1)C(=O)N[O-]	IC50	=	33.56	uM	F	CELL-LINE	HepG2	272.236
Oc1c2c(C(=O)C=C(CC\C=C(\C)/C)C2=O)c(O)cc1	IC50	=	0.9	uM	F	CELL-LINE	HepG2	272.3
O(C)c1c(cccc1O)\C=C\c1cc(OC)cc(O)c1	IC50	=	90.8	uM	F	CELL-LINE	HepG2	272.3
O1c2c(c3c(cc2)cccc3)C(=O)C=C1c1ccccc1	EC50	=	8	uM	F	CELL-LINE	HepG2	272.303
O(C)c1c2NC[C@H]3N(C=C(C3)C(=O)C)C(=O)c2ccc1	IC50	=	56.1	uM	F	CELL-LINE	HepG2	272.304
O=C(\C(=C\c1ccccc1)\C#N)c1c2c([nH]c1)cccc2	IC50	=	58.07	uM	F	CELL-LINE	HepG2	272.307
[nH]1nc(c(c1)-c1c2c(ncc1)cccc2)-c1ncccc1	IC50	=	0.06	uM	F	CELL-LINE	HepG2	272.311
Clc1cc2nc([nH]c2nc1)-c1ccc(N(C)C)cc1	IC50	=	5.85	uM	F	CELL-LINE	HepG2	272.739
[n+]1(ccc2c([nH]c3c2cccc3)c1C)Cc1ccccc1	IC50	=	69.5	uM	F	CELL-LINE	HepG2	273.359
Brc1n2c(nc1-c1ccccc1)C=NC=C2	IC50	=	108.7	uM	F	CELL-LINE	HepG2	274.121
O(C)c1ccc(cc1)\C=C(/Cn1nnnc1)\C(OC)=O	IC50	=	6.65	uM	F	CELL-LINE	HepG2	274.28
O1c2c(cc(O)cc2)/C(=N/[N-]C(=O)N)/CC12CCCC2	IC50	=	100	uM	F	CELL-LINE	HepG2	274.3
Oc1cc(nc2c1c1c([nH]cc1)cc2)-c1cc(ccc1)C	IC50	=	10	uM	F	CELL-LINE	HepG2	274.323
O=C1C=C(Nc2c1c1c(n(cc1)C)cc2)c1ccccc1	IC50	=	1	uM	F	CELL-LINE	HepG2	274.323
s1c(cnc1\N=C\1/OC(=O)C2[C@@H]3CC[C@H](C/12)C=C3)C	IC50	=	92	uM	F	CELL-LINE	HepG2	274.344
Oc1ccc2c(cccc2)c1C(CC=C)c1ccccc1	IC50	=	53	uM	F	CELL-LINE	HepG2	274.363
Clc1ccc(NC(=O)NCCc2ccccc2)cc1	IC50	=	37.6	uM	F	CELL-LINE	HepG2	274.751
O=C1C=C(\N=C/c2ccc(cc2)C)c2c(cccc2)C1=O	IC50	=	10.43	uM	F	CELL-LINE	HepG2	275.307
S(=O)([O-])(=NC(=O)c1cccnc1)c1ccc(cc1)C	IC50	=	12.3	uM	F	CELL-LINE	HepG2	275.308
S(=O)([O-])(=NC(=O)c1ncccc1)c1ccc(cc1)C	IC50	=	12.1	uM	F	CELL-LINE	HepG2	275.308
S(=O)([O-])(=NC(=O)c1ccncc1)c1ccc(cc1)C	IC50	=	20.2	uM	F	CELL-LINE	HepG2	275.308
Oc1cc(nc2c1c1c([nH]cc1)cc2)-c1cc(N)ccc1	IC50	=	30	uM	F	CELL-LINE	HepG2	275.311
n1nnn(C/C(=C/c2c3c(ccc2)cccc3)/C#N)c1C	IC50	=	2.6	uM	F	CELL-LINE	HepG2	275.315
S(CCC)c1nc(N)cc(OCc2ccccc2)n1	GI50	=	87.1	uM	F	CELL-LINE	HepG2	275.376
Clc1ccc(NC(=O)NCCc2ncccc2)cc1	IC50	=	22.7	uM	F	CELL-LINE	HepG2	275.739
o1cc(c2c1-c1c(c3c(cc1)c(ccc3)C)C(=O)C2=O)C	EC50	=	6.3	uM	F	CELL-LINE	HepG2	276.291
s1ccnc1-c1nc2sc(C(=O)N)c(N)c2cc1	IC50	=	1.3	uM	F	CELL-LINE	HepG2	276.344
O=C(CC[NH+](C)C)c1ccc(cc1)CCCCCCC	EC50	=	54	uM	F	CELL-LINE	HepG2	276.444
[Se]=C(NNC(=O)c1ccc(Cl)cc1)N	IC50	=	10.66	uM	F	CELL-LINE	HepG2	276.588
Oc1ccccc1\C=N/C1=CC(=O)C(=O)c2c1cccc2	IC50	=	11.04	uM	F	CELL-LINE	HepG2	277.279
Oc1ccc(cc1)\C=N/C1=CC(=O)C(=O)c2c1cccc2	IC50	=	8.92	uM	F	CELL-LINE	HepG2	277.279
O1c2c(C=C(c3nc4n(C=C(N=C4)C)c3)C1=O)cccc2	IC50	=	102	uM	F	CELL-LINE	HepG2	277.283
Oc1nc(nc2n(cnc12)[C@@H]1C[C@@H](O)[C@H](CO)C1=C)N	EC50	=	100	uM	F	CELL-LINE	HepG2	277.284
O=C1NC(=Nc2n(cnc12)[C@H]1C[C@H](O)[C@@H](CO)C1=C)N	EC50	=	0.003	uM	F	CELL-LINE	HepG2	277.284
O(CCC)c1c2cc([nH]c2ccc1OCC)C(OC)=O	IC50	=	63.49	uM	F	CELL-LINE	HepG2	277.32
O(C)c1cc(Nc2n[nH]c-3c2Cc2c-3cccc2)ccc1	IC50	=	6.8	uM	F	CELL-LINE	HepG2	277.327
O(C)c1ccc(Nc2n[nH]c-3c2Cc2c-3cccc2)cc1	IC50	=	9.1	uM	F	CELL-LINE	HepG2	277.327
O(C)c1c-2c(Cc3c-2[nH]nc3Nc2ccccc2)ccc1	IC50	=	0.75	uM	F	CELL-LINE	HepG2	277.327
O(C)c1cc-2c(Cc3c-2n[nH]c3Nc2ccccc2)cc1	IC50	=	15.4	uM	F	CELL-LINE	HepG2	277.327
O(C)c1c2Cc3c(n[nH]c3Nc3ccccc3)-c2ccc1	IC50	=	5.2	uM	F	CELL-LINE	HepG2	277.327
O(C)c1ccccc1\C=C\C1=Nc2c(cccc2)C1(C)C	IC50	=	12.58	uM	F	CELL-LINE	HepG2	277.367
O(C)c1cc(ccc1)\C=C\C1=Nc2c(cccc2)C1(C)C	IC50	=	9.94	uM	F	CELL-LINE	HepG2	277.367
O(C)c1ccc(cc1)\C=C\C1=Nc2c(cccc2)C1(C)C	IC50	=	47.02	uM	F	CELL-LINE	HepG2	277.367
Clc1ccc(cc1)C1=Nc2c(OC1)cc(Cl)cc2	IC50	=	88	uM	F	CELL-LINE	HepG2	278.138
FC(F)(F)c1ccccc1-c1cc(CC=C)c(O)cc1	IC50	=	52.4	uM	F	CELL-LINE	HepG2	278.273
FC(F)(F)c1cc(ccc1)-c1cc(CC=C)c(O)cc1	IC50	=	58.3	uM	F	CELL-LINE	HepG2	278.273
FC(F)(F)c1ccc(cc1)-c1cc(CC=C)c(O)cc1	IC50	=	60.3	uM	F	CELL-LINE	HepG2	278.273
O1C[C@@H](C2=C1c1c(c3c(cc1)c(ccc3)C)C(=O)C2=O)C	EC50	=	2.5	uM	F	CELL-LINE	HepG2	278.307
O1c2c(ccc3c2cccc3)C(=O)C=C1C1CCCCC1	IC50	=	2.9	uM	F	CELL-LINE	HepG2	278.351
S=C(N)[N-]\N=C\1/CC(Oc2c/1cc(O)cc2)(CC)C	IC50	=	60	uM	F	CELL-LINE	HepG2	278.356
O(CCCCCC)c1cc(ccc1)C(=O)CC[NH+](C)C	EC50	=	45	uM	F	CELL-LINE	HepG2	278.416
O(CCCCCC)c1ccc(cc1)C(=O)CC[NH+](C)C	EC50	=	65	uM	F	CELL-LINE	HepG2	278.416
FC(F)(F)c1ccc(cc1)\C=C(/C#N)\Cn1nnnc1	IC50	=	1.65	uM	F	CELL-LINE	HepG2	279.225
S(=O)([O-])(=NC(=O)c1cccnc1)c1ccc(F)cc1	IC50	=	9	uM	F	CELL-LINE	HepG2	279.271
S(=O)([O-])(=NC(=O)c1ccncc1)c1ccc(F)cc1	IC50	=	12.4	uM	F	CELL-LINE	HepG2	279.271
S(=O)([O-])(=NC(=O)c1ncccc1)c1ccc(F)cc1	IC50	=	8.5	uM	F	CELL-LINE	HepG2	279.271
Fc1cc2[nH]cc(c2cc1)\C=C/1\c2cccnc2NC\1=O	IC50	=	15.4	uM	F	CELL-LINE	HepG2	279.274
O1C(=O)C(=C2[C@H](O)[C@@H]3[C@](CC12O)(C)[C@H](O)CC=C3C)C	EC50	=	67.5	uM	F	CELL-LINE	HepG2	280.32
Oc1ccccc1C1N(N=C(C1)C)C(=O)c1ccccc1	IC50	=	29.43	uM	F	CELL-LINE	HepG2	280.327
O(C)c1ccc(cc1)-c1cc(CC=C)c(O)c(c1)CC=C	IC50	=	69.2	uM	F	CELL-LINE	HepG2	280.367
O(C)c1ccc(cc1CC=C)-c1cc(ccc1O)CC=C	IC50	=	55.3	uM	F	CELL-LINE	HepG2	280.367
O(C)c1ccc(cc1-c1cc(CC=C)c(O)cc1)CC=C	IC50	=	57.5	uM	F	CELL-LINE	HepG2	280.367
O=C(\C=C\[C@H](O)Cc1ccccc1)CCc1ccccc1	IC50	=	184.86	uM	F	CELL-LINE	HepG2	280.367
O=C(\C=C\[C@@H](O)Cc1ccccc1)CCc1ccccc1	IC50	=	354.68	uM	F	CELL-LINE	HepG2	280.367
S=C(N)[N-]\N=C(\C=C\c1ccccc1)/c1ccccc1	IC50	=	1.46	uM	F	CELL-LINE	HepG2	280.375
[se]1nnc-2c1C(Oc1c-2cc(O)cc1)(C)C	IC50	=	60	uM	F	CELL-LINE	HepG2	281.176
s1c2nc(ccc2c(N)c1C#N)-c1ccc(OC)cc1	IC50	=	68	uM	F	CELL-LINE	HepG2	281.339
O=C1[C@H](C[C@@H](C[C@H]1[C@H](O)CC1CC(=O)NC(=O)C1)C)C	IC50	=	2.5	uM	F	CELL-LINE	HepG2	281.352
O(C)c1ccc(cc1CC=C)-c1ccc(NC(=O)C)cc1	IC50	=	60.1	uM	F	CELL-LINE	HepG2	281.355
S(=O)(Cc1ccccc1)CCCCCCN=C=S	IC50	=	6.17	uM	F	CELL-LINE	HepG2	281.444
Fc1ccc(cc1)C=1NC(=O)N=C(C=1)c1ccccc1O	IC50	=	25.83	uM	F	CELL-LINE	HepG2	282.274
o1c(ccc1\C=C\C(=O)N[O-])\C=C\C(=O)c1ccccc1	IC50	=	12.12	uM	F	CELL-LINE	HepG2	282.275
O1c2c(cccc2)C(=O)C=C1c1cc(OC)cc(OC)c1	GI50	=	58.8	uM	F	CELL-LINE	HepG2	282.295
O(CC)c1cc2n(c3c(c2cc1)ccnc3C)CCCC	IC50	=	43.6516	uM	F	CELL-LINE	HepG2	282.387
O(CC(C)C)c1cc2n(c3c(c2cc1)ccnc3C)CC	IC50	=	20.8	uM	F	CELL-LINE	HepG2	282.387
O(CCCC)c1cc2n(c3c(c2cc1)ccnc3C)CC	IC50	=	16.3	uM	F	CELL-LINE	HepG2	282.387
Oc1c2c(cc(c1)C(=O)[O-])C(=O)c1c(C2=O)c(O)ccc1	IC50	=	12.3	uM	F	CELL-LINE	HepG2	283.215
O1CCC2C(=NNC(=O)c3c2[nH]nc3N)c2c1cccc2	IC50	=	60	uM	F	CELL-LINE	HepG2	283.291
Oc1ccc(cc1C(C=C)(C)C)-c1cc([N+](=O)[O-])ccc1	IC50	=	56	uM	F	CELL-LINE	HepG2	283.327
O=C(NN)c1[nH]nc(c1)-c1c2c(n(c1)CCC)cccc2	IC50	=	32.86	uM	F	CELL-LINE	HepG2	283.335
[NH3+]CCNc1nccc2c1n(c1c2cccc1)CCCC	IC50	=	6.6	uM	F	CELL-LINE	HepG2	283.399
S(=O)(Cc1ccc(OC)cc1)CCCCN=C=S	IC50	=	4.62	uM	F	CELL-LINE	HepG2	283.416
P1(OCCCN1)([O-])=NC(=O)c1ccc([N+](=O)[O-])cc1	IC50	=	0.57	uM	F	CELL-LINE	HepG2	284.188
o1c2c(nc1Cn1nnc(c1)\C=C\C(=O)N[O-])cccc2	GI50	=	6.1	uM	F	CELL-LINE	HepG2	284.255
O1c2c(C(=O)C=C1C1(OC)C=CC(=O)C=C1)c(O)ccc2	IC50	=	26.9	uM	F	CELL-LINE	HepG2	284.267
O(C)c1cc(O)c2c(c1)C(=O)c1c(C2=O)c(O)cc(c1)C	IC50	=	77.3	uM	F	CELL-LINE	HepG2	284.267
O1CC2(O)C(=C3C=C(O)C(=O)C=C3C2)c2c1cc(O)cc2	IC50	=	11.09	uM	F	CELL-LINE	HepG2	284.267
O1c2c(c(O)c(OC)c(O)c2)C(=O)C=C1c1ccccc1	IC50	=	22.7	uM	F	CELL-LINE	HepG2	284.267
O(C)c1ccc(Nc2[n+]([O-])c3c([n+]([O-])n2)cccc3)cc1	IC50	=	10.1	uM	F	CELL-LINE	HepG2	284.275
s1c2c(nc1C)C(=O)C(Nc1ccc(cc1)C)=CC2=O	IC50	=	0.00121	uM	F	CELL-LINE	HepG2	284.339
O=C1N(CC[NH+](C)C)C(=O)c2c3c1cc(N)cc3ccc2	IC50	=	6.45	uM	F	CELL-LINE	HepG2	284.339
S1CC(OC1CO)N1C=CC(=NC1=O)\N=C\N(C)C	EC50	=	0.01	uM	F	CELL-LINE	HepG2	284.34
O1[C@@H]2O[C@]3(OO[C@]24[C@@H](CC[C@H]([C@@H]4CC3)C)[C@@H](C)[C@H]1O)C	IC50	=	30.13	uM	F	CELL-LINE	HepG2	284.352
Oc1cc(nc2c1c1c([nH]cc1)cc2)-c1ccc(cc1)C#N	IC50	=	10	uM	F	CELL-LINE	HepG2	285.306
Oc1cc(nc2c1c1c([nH]cc1)cc2)-c1cc(ccc1)C#N	IC50	=	40	uM	F	CELL-LINE	HepG2	285.306
O1c2cc(OCC[NH+](C)C)cc3cc(nc(C=C1C)c23)C	IC50	=	10.11	uM	F	CELL-LINE	HepG2	285.367
[nH+]1c2c(cccc2)c(NCc2ccccc2)c2c1cccc2	IC50	=	6.07	uM	F	CELL-LINE	HepG2	285.37
Clc1cc(c2OC(=CC(=O)c2c1)c1ccc(N)cc1)C	IC50	=	11.9	uM	F	CELL-LINE	HepG2	285.73
O1c2c(C(=O)C=C1C1(O)C=CC(=O)C=C1)c(O)cc(O)c2	IC50	=	8.11	uM	F	CELL-LINE	HepG2	286.239
O1c2c(C(=O)C=C1c1cc(O)c(O)cc1)c(O)cc(O)c2	IC50	=	71.2	uM	F	CELL-LINE	HepG2	286.239
O1C[C@@]2(O)[C@H](c3cc(O)c(O)cc3C2)c2c1cc(O)cc2	IC50	=	12.03	uM	F	CELL-LINE	HepG2	286.283
s1c2c(nc1C)C(=O)C(Nc1ccc(O)cc1)=CC2=O	IC50	=	0.00136	uM	F	CELL-LINE	HepG2	286.311
O=C1[C@H](O)[C@@H](O)[C@H](OCCCCC)C=C1COC(=O)C	IC50	=	10.1	uM	F	CELL-LINE	HepG2	286.324
O=C1[C@H](O)[C@@H](O)[C@@H](OCCCCC)C=C1COC(=O)C	IC50	=	16.1	uM	F	CELL-LINE	HepG2	286.324
O(C)c1c2c(C(=O)C(=CC2=O)CC\C=C(\C)/C)c(O)cc1	IC50	=	7.64	uM	F	CELL-LINE	HepG2	286.327
O(C)c1c2c(C(=O)C=C(CC\C=C(\C)/C)C2=O)c(O)cc1	IC50	=	8.05	uM	F	CELL-LINE	HepG2	286.327
[nH]1cc(c2c1cccc2)\C=C\C1=Nc2c(cccc2)C1(C)C	IC50	=	12.16	uM	F	CELL-LINE	HepG2	286.378
s1c(nnc1SCc1ccccc1)-c1nccnc1	IC50	=	11.35	uM	F	CELL-LINE	HepG2	286.383
O=C1CC[C@]2([C@@H](CC=C3[C@@H]2CC[C@@](C3)(C=C)C)C1(C)C)C	IC50	=	32.9	uM	F	CELL-LINE	HepG2	286.459
O=C1c2c(nc(nc2)N2CCCC2)N(C=C1C(=O)[O-])CC	IC50	=	110	uM	F	CELL-LINE	HepG2	287.299
s1c2nc(ccc2c(N)c1C(=O)N)-c1ccccc1F	IC50	=	0.7	uM	F	CELL-LINE	HepG2	287.318
s1c2nc(ccc2c(N)c1C(=O)N)-c1cc(F)ccc1	IC50	=	0.63	uM	F	CELL-LINE	HepG2	287.318
s1c2nc(ccc2c(N)c1C(=O)N)-c1ccc(F)cc1	IC50	=	1.89	uM	F	CELL-LINE	HepG2	287.318
O=C1C=C(\N=C/C=C/c2ccccc2)c2c(cccc2)C1=O	IC50	=	10.63	uM	F	CELL-LINE	HepG2	287.318
O=C(\C(=C\c1ncccc1)\C#N)c1c2c(n(c1)C)cccc2	IC50	=	24.38	uM	F	CELL-LINE	HepG2	287.322
[n+]1(cc2[nH]c3c(c2cc1)cccc3)CCCc1ccccc1	IC50	=	44.6684	uM	F	CELL-LINE	HepG2	287.386
Brc1n2C=C(N=Cc2nc1-c1ccccc1)C	IC50	=	61.1	uM	F	CELL-LINE	HepG2	288.148
Oc1c2c(C(=O)C=C([C@H](O)C\C=C(\C)/C)C2=O)c(O)cc1	IC50	=	0.24	uM	F	CELL-LINE	HepG2	288.299
Oc1c2c(C(=O)C=C([C@@H](O)C\C=C(\C)/C)C2=O)c(O)cc1	IC50	=	3.8	uM	F	CELL-LINE	HepG2	288.299
O1CC=2C(=CC1=O)[C@@]1([C@H]3[C@H](OC(=O)[C@]3(C=C[C@H]1O)C)C=2)C	IC50	=	63	uM	F	CELL-LINE	HepG2	288.299
s1c2c(nc1C)C(=O)C(Nc1ccc(F)cc1)=CC2=O	IC50	=	0.00151	uM	F	CELL-LINE	HepG2	288.302
S(Cc1ccc(F)cc1)c1oc(nn1)-c1nccnc1	IC50	=	16.46	uM	F	CELL-LINE	HepG2	288.306
S(Cc1ccccc1F)c1oc(nn1)-c1nccnc1	IC50	=	12.47	uM	F	CELL-LINE	HepG2	288.306
Oc1ccccc1\C=C(\C(=O)c1c2c([nH]c1)cccc2)/C#N	IC50	=	83.65	uM	F	CELL-LINE	HepG2	288.306
O1c2c(OC1)cc1[C@H]3[C@@H]4[NH+](CCC4=C[C@H](O)[C@H]3O)Cc1c2	IC50	=	3.7	uM	F	CELL-LINE	HepG2	288.323
O1c2c(cc(O)cc2)/C(=N/[N-]C(=O)N)/CC12CCCCC2	IC50	=	150	uM	F	CELL-LINE	HepG2	288.327
S=C(Nc1ccc([N+](=O)[O-])cc1)NCc1ncccc1	IC50	=	34.68	uM	F	CELL-LINE	HepG2	288.331
O=C1C=C(Nc2c1c1c(n(cc1)CC)cc2)c1ccccc1	IC50	=	0.05	uM	F	CELL-LINE	HepG2	288.35
Oc1ccc2c(cccc2)c1C(CC=C)c1ccc(cc1)C	IC50	=	5.6	uM	F	CELL-LINE	HepG2	288.39
Clc1ccc(cc1)C1=Nc2cc([N+](=O)[O-])ccc2OC1	IC50	=	78	uM	F	CELL-LINE	HepG2	288.69
ClCC(=O)Nc1cc2nc([nH]c2cc1)-c1n(ccc1)C	IC50	=	1.8	uM	F	CELL-LINE	HepG2	288.738
O(C(=O)/C(=C/c1ccc([N+](=O)[O-])cc1)/Cn1nnnc1)C	IC50	=	2.07	uM	F	CELL-LINE	HepG2	289.251
O(C(=O)/C(=C/c1ccccc1[N+](=O)[O-])/Cn1nnnc1)C	IC50	=	4.33	uM	F	CELL-LINE	HepG2	289.251
O1[C@H](CO)[C@@H](O)[C@@H](O)[C@@H]1n1cc(c2c1ncnc2C)C#C	IC50	=	0.29	uM	F	CELL-LINE	HepG2	289.291
o1cccc1C(=O)Nc1cc2nc3c(nc2cc1)cccc3	IC50	=	52.25	uM	F	CELL-LINE	HepG2	289.294
O=C/1Nc2ncccc2\C\1=C\c1c2c([nH]c1)c(ccc2)CC	IC50	=	10.5	uM	F	CELL-LINE	HepG2	289.338
S1C[C@H](N(C(=O)C#C)C1c1ccccc1)C(OCC)=O	IC50	=	10	uM	F	CELL-LINE	HepG2	289.355
S(Cc1ccccc1)c1nc(N)cc(OCC(C)C)n1	GI50	=	60.8	uM	F	CELL-LINE	HepG2	289.403
S(Cc1ccccc1)C1=NC(N)=CC(=O)N1CC(C)C	GI50	=	77	uM	F	CELL-LINE	HepG2	289.403
O1[C@H](CO)[C@@H](O)[C@H](O)[C@@H]1n1cc(c2c1ncnc2N)C#C	IC50	=	9.86	uM	F	CELL-LINE	HepG2	290.279
S(=O)(=O)(N)c1ccc(NP2(=O)NCCCN2)cc1	IC50	=	0.13	uM	F	CELL-LINE	HepG2	290.284
O1CC=2C(=CC1=O)[C@@]1([C@H]3[C@H](OC(=O)[C@]3(C[C@@H](O)C1)C)C=2)C	IC50	=	38	uM	F	CELL-LINE	HepG2	290.315
O(C)c1cc(ccc1)-c1nc2c(c3c([nH]cc3)cc2)c(O)c1	IC50	=	6	uM	F	CELL-LINE	HepG2	290.322
o1c(nnc1CCc1c2c([nH]c1)cccc2)-c1cccnc1	IC50	=	32	uM	F	CELL-LINE	HepG2	290.326
o1c(nnc1CCc1c2c([nH]c1)cccc2)-c1ncccc1	IC50	=	37	uM	F	CELL-LINE	HepG2	290.326
[O-][n+]1c2c([n+]([O-])nc1NCCCCCCCC)cccc2	IC50	=	17.4	uM	F	CELL-LINE	HepG2	290.367
S=C(N)[N-]\N=C\1/CC2(Oc3c/1cc(O)cc3)CCCC2	IC50	=	100	uM	F	CELL-LINE	HepG2	290.367
O=[N+]([O-])c1cc2N(CCCC)C(=N)N(c2cc1)CCCC	EC50	=	0.142	uM	F	CELL-LINE	HepG2	290.367
N=1c2c(cccc2)C(C)(C)C=1\C=C\c1ccc(N(C)C)cc1	IC50	=	22.1	uM	F	CELL-LINE	HepG2	290.41
O(CCCCCC)c1cc2CC(C[NH+](C)C)C(=O)c2cc1	EC50	=	14	uM	F	CELL-LINE	HepG2	290.427
O(CCCCCC)c1ccc(cc1)C(=O)CC[NH+]1CC1C	EC50	=	67	uM	F	CELL-LINE	HepG2	290.427
Clc1ccc(NC(=S)NCCc2ccccc2)cc1	IC50	=	44.7	uM	F	CELL-LINE	HepG2	290.818
S(=O)(=O)(N)c1ccc(NP2(OCCCN2)=O)cc1	IC50	=	0.14	uM	F	CELL-LINE	HepG2	291.268
O(C)c1ccc(cc1)\C=N/C1=CC(=O)C(=O)c2c1cccc2	IC50	=	9.03	uM	F	CELL-LINE	HepG2	291.306
O1c2cc(Nc3n[nH]c-4c3Cc3c-4cccc3)ccc2OC1	IC50	=	12.7	uM	F	CELL-LINE	HepG2	291.31
O1c2c(OC1)cc-1c(Cc3c-1[nH]nc3Nc1ccccc1)c2	IC50	=	11.2	uM	F	CELL-LINE	HepG2	291.31
O(CCCC)c1c2cc([nH]c2ccc1OCC)C(OC)=O	IC50	=	167.5	uM	F	CELL-LINE	HepG2	291.347
ClC1=C(Nc2ccccc2F)C(=O)c2c([nH]nc2)C1=O	IC50	=	15.8	uM	F	CELL-LINE	HepG2	291.669
ClC1=C(Nc2ccc(F)cc2)C(=O)c2c([nH]nc2)C1=O	IC50	=	37.2	uM	F	CELL-LINE	HepG2	291.669
ClC1=C(Nc2cc(F)ccc2)C(=O)c2c([nH]nc2)C1=O	IC50	=	8.9	uM	F	CELL-LINE	HepG2	291.669
Brc1n2c(nc1-c1ccc(F)cc1)C=NC=C2	IC50	=	87.6	uM	F	CELL-LINE	HepG2	292.111
O1c2c(C(=O)C=C1CO)c(O)c1C[C@H](Oc1c2)C(O)(C)C	IC50	=	5.55	uM	F	CELL-LINE	HepG2	292.287
FC(F)(F)c1ccc(cc1)-c1cc(CC=C)c(OC)cc1	IC50	=	89	uM	F	CELL-LINE	HepG2	292.3
O=[N+]([O-])c1ccccc1\C=C\C1=Nc2c(cccc2)C1(C)C	IC50	=	9.74	uM	F	CELL-LINE	HepG2	292.338
O=[N+]([O-])c1cc(ccc1)\C=C\C1=Nc2c(cccc2)C1(C)C	IC50	=	2.27	uM	F	CELL-LINE	HepG2	292.338
O=[N+]([O-])c1ccc(cc1)\C=C\C1=Nc2c(cccc2)C1(C)C	IC50	=	2.49	uM	F	CELL-LINE	HepG2	292.338
Fc1ccccc1C(CC=C)c1c2c(ccc1O)cccc2	IC50	=	9.7	uM	F	CELL-LINE	HepG2	292.353
Fc1ccc(cc1)C(CC=C)c1c2c(ccc1O)cccc2	IC50	=	1.2	uM	F	CELL-LINE	HepG2	292.353
Fc1cc(ccc1)C(CC=C)c1c2c(ccc1O)cccc2	IC50	=	6.5	uM	F	CELL-LINE	HepG2	292.353
OCCCNc1c2c([nH+]c3c1[nH]c1c3cccc1)cccc2	IC50	=	1	uM	F	CELL-LINE	HepG2	292.362
O(CCCCCC)c1ccc(cc1C)C(=O)CC[NH+](C)C	EC50	=	38	uM	F	CELL-LINE	HepG2	292.443
O(CCCCCC)c1ccc(cc1)C(=O)C(C[NH+](C)C)C	EC50	=	56	uM	F	CELL-LINE	HepG2	292.443
O(CCCCCC)c1cc(C)c(cc1)C(=O)CC[NH+](C)C	EC50	=	32	uM	F	CELL-LINE	HepG2	292.443
Clc1ccc(cc1)\C=C(/Cn1nnnc1)\C(OCC)=O	IC50	=	3	uM	F	CELL-LINE	HepG2	292.726
o1cc(NC(OC)=O)cc1C(=O)Nc1cc(oc1)C(=O)N	GI50	=	2.8	uM	F	CELL-LINE	HepG2	293.235
[se]1cc(nc1N\N=C\c1ccc(OC)cc1)C	IC50	=	83.24	uM	F	CELL-LINE	HepG2	294.219
O1[C@H]2[C@H](O[C@H](C2)CCC)c2c(c(O)c(O)c(OC)c2)C1=O	IC50	=	23.7	uM	F	CELL-LINE	HepG2	294.303
O(C)c1ccccc1C=1NC(=O)N=C(C=1)c1ccccc1O	IC50	=	41.72	uM	F	CELL-LINE	HepG2	294.31
O1[C@H](CO)[C@@H](O)[C@@H](O)[C@@H]1n1c2ncnc(N(C)C)c2cc1	IC50	=	1.81	uM	F	CELL-LINE	HepG2	294.311
O1c2c(cc(cc2)C(C)C)C(=O)C=C1c1ccccc1OC	IC50	=	5.4	uM	F	CELL-LINE	HepG2	294.35
O1c2c(cc(cc2)C(C)C)C(=O)C=C1c1cc(OC)ccc1	IC50	=	2.1	uM	F	CELL-LINE	HepG2	294.35
O1c2c(cc(cc2)C(C)C)C(=O)C=C1c1ccc(OC)cc1	IC50	=	9.9	uM	F	CELL-LINE	HepG2	294.35
Oc1c(cc(cc1C=O)CC=C)-c1cc(CC=C)c(O)cc1	IC50	=	32.9	uM	F	CELL-LINE	HepG2	294.35
Oc1ccccc1C1N(N=C(C1)C)C(=O)c1ccc(cc1)C	IC50	=	78.87	uM	F	CELL-LINE	HepG2	294.354
Oc1ccccc1C1N(N=C(C1)C)C(=O)c1ccccc1C	IC50	=	95.17	uM	F	CELL-LINE	HepG2	294.354
Oc1c(cccc1C)C1N(N=C(C1)C)C(=O)c1ccccc1	IC50	=	177.4	uM	F	CELL-LINE	HepG2	294.354
O(CC)c1ccc(cc1CC=C)-c1cc(ccc1O)CC=C	IC50	=	73.8	uM	F	CELL-LINE	HepG2	294.394
O(CC)c1ccc(cc1-c1cc(CC=C)c(O)cc1)CC=C	IC50	=	71.5	uM	F	CELL-LINE	HepG2	294.394
S=C(N)[N-]\N=C(\C=C\c1ccccc1)/c1ccc(cc1)C	IC50	=	0.78	uM	F	CELL-LINE	HepG2	294.402
S=C(N)[N-]\N=C(\C=C\c1ccc(cc1)C)/c1ccccc1	IC50	=	11	uM	F	CELL-LINE	HepG2	294.402
S(CCCCCC)c1ccc(cc1)C(=O)CC[NH+](C)C	EC50	=	34	uM	F	CELL-LINE	HepG2	294.483
[se]1nnc-2c1C(Oc1c-2cc(O)cc1)(CC)C	IC50	=	50	uM	F	CELL-LINE	HepG2	295.203
Fc1ccc(cc1)-c1nc(ncc1)Nc1cc(OC)ccc1	IC50	=	127.64	uM	F	CELL-LINE	HepG2	295.317
Oc1c(cc(cc1CC=C)-c1cc([N+](=O)[O-])ccc1)CC=C	IC50	=	80.5	uM	F	CELL-LINE	HepG2	295.338
s1cccc1-c1oc(nn1)CCc1c2c([nH]c1)cccc2	IC50	=	24	uM	F	CELL-LINE	HepG2	295.366
Clc1ccccc1\C=N/C1=CC(=O)C(=O)c2c1cccc2	IC50	=	12.1	uM	F	CELL-LINE	HepG2	295.725
Clc1ccc(S(=O)([O-])=NC(=O)c2cccnc2)cc1	IC50	=	8.6	uM	F	CELL-LINE	HepG2	295.726
Clc1ccc(S(=O)([O-])=NC(=O)c2ccncc2)cc1	IC50	=	7.9	uM	F	CELL-LINE	HepG2	295.726
Clc1ccc(S(=O)([O-])=NC(=O)c2ncccc2)cc1	IC50	=	8.1	uM	F	CELL-LINE	HepG2	295.726
o1c(ccc1\C=C\C(=O)N[O-])\C=C\C(=O)c1ccc(cc1)C	IC50	=	16.04	uM	F	CELL-LINE	HepG2	296.302
Fc1ccc(cc1)\C=C\1/CC\C(=C/c2ccc(F)cc2)\C/1=O	IC50	=	48	uM	F	CELL-LINE	HepG2	296.316
Fc1cc(ccc1OCCCCCC)C(=O)CC[NH+](C)C	EC50	=	37	uM	F	CELL-LINE	HepG2	296.406
O(C)c1ccc(cc1)C\C=C\CCCCc1ccc(O)cc1	IC50	=	40.6	uM	F	CELL-LINE	HepG2	296.41
O(C(C)C)c1cc2n(c3c(c2cc1)ccnc3C)CCCC	IC50	=	30.1995	uM	F	CELL-LINE	HepG2	296.414
Clc1c(cccc1Cl)\C=C\c1oc(cc1)C(=O)N[O-]	IC50	=	37.2	uM	F	CELL-LINE	HepG2	297.117
P(=O)([O-])([O-])COC1(CC1)Cn1c2nc(ncc2nc1)N	EC50	=	4	uM	F	CELL-LINE	HepG2	297.211
P(=O)([O-])([O-])COC1(CC1)Cn1c2ncnc(N)c2nc1	EC50	=	8	uM	F	CELL-LINE	HepG2	297.211
o1c2c(nc1C(n1nnc(c1)\C=C\C(=O)N[O-])C)cccc2	GI50	=	2.9	uM	F	CELL-LINE	HepG2	298.282
O(C)c1c(OC)c2c(cc1OC)C(=O)CC2c1ccccc1	IC50	=	188	uM	F	CELL-LINE	HepG2	298.338
S=C1NC(=CC(=N1)c1ccccc1O)c1ccc(F)cc1	IC50	=	83.06	uM	F	CELL-LINE	HepG2	298.341
[nH]1nc(c(c1)-c1cc(ncc1)-c1ccccc1)-c1ncccc1	IC50	=	0.519	uM	F	CELL-LINE	HepG2	298.349
S=C(N)[N-]\N=C(\C=C\c1ccccc1F)/c1ccccc1	IC50	=	14	uM	F	CELL-LINE	HepG2	298.365
S=C(N)[N-]\N=C(\C=C\c1cc(F)ccc1)/c1ccccc1	IC50	=	1.11	uM	F	CELL-LINE	HepG2	298.365
S=C(N)[N-]\N=C(\C=C\c1ccc(F)cc1)/c1ccccc1	IC50	=	12	uM	F	CELL-LINE	HepG2	298.365
S(=O)(Cc1ccc([N+](=O)[O-])cc1)CCCCN=C=S	IC50	=	3.18	uM	F	CELL-LINE	HepG2	298.387
[NH2+]=C(NCCCCNC(=[NH2+])c1ccncc1)c1ccncc1	IC50	=	11.176	uM	F	CELL-LINE	HepG2	298.394
[se]1cc(nc1N\N=C\c1ccc(Cl)cc1)C	IC50	=	56.46	uM	F	CELL-LINE	HepG2	298.638
Clc1ccc(cc1)C=1NC(=O)N=C(C=1)c1ccccc1O	IC50	=	126.27	uM	F	CELL-LINE	HepG2	298.729
s1c2nc(ccc2c(N)c1C(=O)N)-c1ccc(OC)cc1	IC50	=	0.019	uM	F	CELL-LINE	HepG2	299.354
s1c2nc(ccc2c(N)c1C(=O)N)-c1cc(OC)ccc1	IC50	=	0.016	uM	F	CELL-LINE	HepG2	299.354
s1c2c(ncc(c2)-c2ccccc2N)c(N)c1C(OC)=O	GI50	=	21.7	uM	F	CELL-LINE	HepG2	299.354
[n+]1(cc2n(c3c(c2cc1)cccc3)CC=C)Cc1ccccc1	IC50	=	67.8	uM	F	CELL-LINE	HepG2	299.397
[nH+]1c2c(cccc2C)c(NCc2ccccc2)c2c1cccc2	IC50	=	3.64	uM	F	CELL-LINE	HepG2	299.397
O=C([O-])[C@]1([C@@H]2CCc3cc(ccc3[C@]2(CCC1)C)C(C)C)C	IC50	=	85	uM	F	CELL-LINE	HepG2	299.434
ClCC(=O)Nc1cc2nc([nH]c2cc1)-c1ccc(cc1)C	IC50	=	2	uM	F	CELL-LINE	HepG2	299.761
Fc1ccc(cc1)C(=O)\C=C\c1oc(cc1)\C=C\C(=O)N[O-]	IC50	=	12	uM	F	CELL-LINE	HepG2	300.265
O1c2c(C(=O)C=C1C1(O)C=CC(=O)C=C1)c(O)cc(OC)c2	IC50	=	0.57	uM	F	CELL-LINE	HepG2	300.266
O1C2=CC(=O)C(NC(=O)CO)=CC2=Nc2cc(ccc12)CO	GI50	=	6.6	uM	F	CELL-LINE	HepG2	300.27
O(C)C1=Nc2n(cc(n2)-c2ccc([N+](=O)[O-])cc2)C(OC)=C1	GI50	=	35.9	uM	F	CELL-LINE	HepG2	300.274
O=C1C=C(\N=C/c2c3c([nH]c2)cccc3)c2c(cccc2)C1=O	IC50	=	10.14	uM	F	CELL-LINE	HepG2	300.317
s1c2c(nc1Cn1nnc(c1)\C=C\C(=O)N[O-])cccc2	GI50	=	8.8	uM	F	CELL-LINE	HepG2	300.322
s1c2c(nc1C)C(=O)C(Nc1ccc(OC)cc1)=CC2=O	IC50	=	0.00139	uM	F	CELL-LINE	HepG2	300.338
O(C)c1c(OC)cc(cc1OC)\C=C\c1ccc(OC)cc1	IC50	=	0.3	uM	F	CELL-LINE	HepG2	300.354
O(C)c1ccc(cc1)\C=C\c1nccc2c1[nH]c1c2cccc1	IC50	=	60.5	uM	F	CELL-LINE	HepG2	300.361
O1[C@@H]2C=3C=C(C)C(=O)C(O)=CC=3[C@@]3([C@@H](C2)C(CCC3)(C)C)C1	IC50	=	2	uM	F	CELL-LINE	HepG2	300.398
O(CCCCCC)c1ccc(cc1)C(=O)CCn1ccnc1	EC50	=	54	uM	F	CELL-LINE	HepG2	300.402
n1ccc2c(n(c3c2cccc3)CCCc2ccccc2)c1C	IC50	=	449	uM	F	CELL-LINE	HepG2	300.405
[nH]1c2c(cccc2)c(\C=C\C2=Nc3c(cccc3)C2(C)C)c1C	IC50	=	4.41	uM	F	CELL-LINE	HepG2	300.405
n1(cc(c2c1cccc2)\C=C\C1=Nc2c(cccc2)C1(C)C)C	IC50	=	18.73	uM	F	CELL-LINE	HepG2	300.405
[nH]1cc(c2cc(ccc12)C)\C=C\C1=Nc2c(cccc2)C1(C)C	IC50	=	6.13	uM	F	CELL-LINE	HepG2	300.405
Brc1ccc(cc1)C=1Oc2c(cccc2)C(=O)C=1	EC50	=	30	uM	F	CELL-LINE	HepG2	301.139
s1cccc1C(=O)c1cc2[nH]c(nc2cc1)NC(OC)=O	GI50	=	0.76	uM	F	CELL-LINE	HepG2	301.326
O1c2cc(OCCOCCO)cc3cc(nc(C=C1C)c23)C	IC50	=	29.81	uM	F	CELL-LINE	HepG2	301.342
S\C(=N/CCc1ccccc1)\Nc1ccc([N+](=O)[O-])cc1	IC50	=	25.45	uM	F	CELL-LINE	HepG2	301.37
[n+]1(ccc2c([nH]c3c2cccc3)c1C)CCCc1ccccc1	IC50	=	33.1131	uM	F	CELL-LINE	HepG2	301.413
[n+]1(cc2n(c3c(c2cc1)cccc3)CCCc1ccccc1)C	IC50	=	90.8	uM	F	CELL-LINE	HepG2	301.413
[n+]1(cc2n(c3c(c2cc1)cccc3)C(C)C)Cc1ccccc1	IC50	=	58.7	uM	F	CELL-LINE	HepG2	301.413
Clc1ccc(cc1[N+](=O)[O-])C=1Oc2c(cccc2)C(=O)C=1	GI50	=	93.8	uM	F	CELL-LINE	HepG2	301.685
Brc1n2C=C(N=Cc2nc1-c1ccc(cc1)C)C	IC50	=	85.1	uM	F	CELL-LINE	HepG2	302.175
O1c2c(C(=O)C(O)=C1c1cc(O)c(O)cc1)c(O)cc(O)c2	IC50	=	30.9	uM	F	CELL-LINE	HepG2	302.238
O(C)c1c(OC)c(O)ccc1\C=C\c1cc(OC)cc(O)c1	IC50	=	37.1	uM	F	CELL-LINE	HepG2	302.326
O1c2c(OC1)cc1[C@@]34[C@@H]([NH+](C[C@@H]3O)Cc1c2)C[C@H](OC)C=C4	IC50	=	4.8	uM	F	CELL-LINE	HepG2	302.35
O1c2c(cc(O)cc2)/C(=N/[N-]C(=O)N)/CC12CCCCCC2	IC50	=	1120	uM	F	CELL-LINE	HepG2	302.354
S=C(Nc1ccc([N+](=O)[O-])cc1)NCCc1ncccc1	IC50	=	152.14	uM	F	CELL-LINE	HepG2	302.358
S(=O)(=O)(NCCc1ccccc1)c1ccc(N=[N+]=[N-])cc1	IC50	=	92.61	uM	F	CELL-LINE	HepG2	302.358
Oc1cc(ccc1O)CC(C(Cc1cc(O)c(O)cc1)C)C	IC50	=	54.1	uM	F	CELL-LINE	HepG2	302.37
O(CC1CCCCC1)c1cc(N)cc2[nH]c(cc12)C(OC)=O	IC50	=	14.5	uM	F	CELL-LINE	HepG2	302.374
O=C1C=C(Nc2c1c1c(n(cc1)CCC)cc2)c1ccccc1	IC50	=	0.04	uM	F	CELL-LINE	HepG2	302.377
O=C\1C\C=C(\C[C@H](O)\C=C(\CC[C@H]2[C@@H](\C=C/1\C)C2(C)C)/C)/C	IC50	=	61	uM	F	CELL-LINE	HepG2	302.458
Clc1ccccc1CNc1[n+]([O-])c2c([n+]([O-])n1)cccc2	IC50	=	9.7	uM	F	CELL-LINE	HepG2	302.721
o1c(nnc1CCc1c2c([nH]c1)cccc2)-c1ccc(cc1)C	IC50	=	24	uM	F	CELL-LINE	HepG2	303.365
o1c(nnc1CCCc1c2c([nH]c1)cccc2)-c1ccccc1	IC50	=	40	uM	F	CELL-LINE	HepG2	303.365
O(C)c1cc2[nH]c3c(c2cc1)cc[n+](Cc1ccccc1)c3C	IC50	=	54.9541	uM	F	CELL-LINE	HepG2	303.385
Clc1cc2[nH+]c3c(cc(OC)cc3)c(NCC[NH3+])c2cc1	IC50	=	6	uM	F	CELL-LINE	HepG2	303.793
O1CC=2C(=CC1=O)[C@@]1([C@H]3[C@H](OC(=O)[C@@]3(C)[C@@H](O)[C@H]3O[C@@H]13)C=2)C	IC50	=	35	uM	F	CELL-LINE	HepG2	304.298
O1c2c(c3c(cc2)cccc3)C(=O)C=C1C1(O)C=CC(=O)C=C1	IC50	=	3.55	uM	F	CELL-LINE	HepG2	304.301
O=C1C=C(Nc2c1c1c(n(cc1)COC)cc2)c1ccccc1	IC50	=	0.8	uM	F	CELL-LINE	HepG2	304.349
O=C1C=C(\N=C/c2ccc(N(C)C)cc2)c2c(cccc2)C1=O	IC50	=	7.72	uM	F	CELL-LINE	HepG2	304.349
o1c(ccc1CO)-c1nn(c2c1cccc2)Cc1ccccc1	IC50	=	2.2	uM	F	CELL-LINE	HepG2	304.349
Fc1cc2[nH]cc(c2cc1)\C=C\C1=Nc2c(cccc2)C1(C)C	IC50	=	14.91	uM	F	CELL-LINE	HepG2	304.368
s1c(nnc1SCc1ccc(F)cc1)-c1nccnc1	IC50	=	10.12	uM	F	CELL-LINE	HepG2	304.373
s1c(nnc1SCc1ccccc1F)-c1nccnc1	IC50	=	9.52	uM	F	CELL-LINE	HepG2	304.373
S=C(N)[N-]\N=C\1/CC2(Oc3c/1cc(O)cc3)CCCCC2	IC50	=	820	uM	F	CELL-LINE	HepG2	304.394
O(CCCCCC)c1cc2c(cc1)C(=O)C(CC2)C[NH+](C)C	EC50	=	12	uM	F	CELL-LINE	HepG2	304.454
O(CCCCCC)c1ccc(cc1)C(=O)CC[NH+]1CCCC1	EC50	=	59	uM	F	CELL-LINE	HepG2	304.454
Clc1ccc(NC2=CC(=O)c3sc(nc3C2=O)C)cc1	IC50	=	0.00278	uM	F	CELL-LINE	HepG2	304.757
Clc1ccccc1CSc1oc(nn1)-c1nccnc1	IC50	=	12.29	uM	F	CELL-LINE	HepG2	304.761
Clc1ccc(cc1)CSc1oc(nn1)-c1nccnc1	IC50	=	11.47	uM	F	CELL-LINE	HepG2	304.761
Clc1cc(ccc1)CSc1oc(nn1)-c1nccnc1	IC50	=	7.5	uM	F	CELL-LINE	HepG2	304.761
ClCCN(CCCl)c1ccc(cc1)C[C@H]([NH3+])C(=O)[O-]	GI50	=	17	uM	F	CELL-LINE	HepG2	305.205
O1[C@H](CO)[C@@H](O)[C@@H](O)[C@@H]1n1cc(c2c1ncnc2OC)C#C	IC50	=	12.7	uM	F	CELL-LINE	HepG2	305.29
Oc1cc(nc2c1c1c([nH]cc1)cc2)-c1cc([N+](=O)[O-])ccc1	IC50	=	30	uM	F	CELL-LINE	HepG2	305.293
O1CCOc2c1cc(Nc1n[nH]c-3c1Cc1c-3cccc1)cc2	IC50	=	3.7	uM	F	CELL-LINE	HepG2	305.337
Clc1ccccc1C1c2c(CNc3c1cccc3)cccc2	IC50	=	0.9	uM	F	CELL-LINE	HepG2	305.808
Brc1n2C=C(N=Cc2nc1-c1ccc(F)cc1)C	IC50	=	615	uM	F	CELL-LINE	HepG2	306.138
Fc1cc(F)c2OC(=CC(=O)c2c1N)c1cc(F)c(N)cc1	IC50	=	0.0028	uM	F	CELL-LINE	HepG2	306.243
O=C1C=C(\N=C/c2ccccc2[N+](=O)[O-])c2c(cccc2)C1=O	IC50	=	11.82	uM	F	CELL-LINE	HepG2	306.277
O=C1C=C(\N=C/c2ccc([N+](=O)[O-])cc2)c2c(cccc2)C1=O	IC50	=	15.61	uM	F	CELL-LINE	HepG2	306.277
S(Cc1c(F)cccc1F)c1oc(nn1)-c1nccnc1	IC50	=	17.13	uM	F	CELL-LINE	HepG2	306.296
S(Cc1ccc(F)cc1F)c1oc(nn1)-c1nccnc1	IC50	=	14.41	uM	F	CELL-LINE	HepG2	306.296
Fc1cc\2c(NC(=O)/C/2=C\c2c3c([nH]c2)c(ccc3)CC)cc1	IC50	=	28.1	uM	F	CELL-LINE	HepG2	306.34
O1CC(C[NH+](C)C)C(=O)c2c1cc(OCCCCCC)cc2	EC50	=	12	uM	F	CELL-LINE	HepG2	306.426
O(CCCCCC)c1c(cc(cc1C)C(=O)CC[NH+](C)C)C	EC50	=	41	uM	F	CELL-LINE	HepG2	306.47
O(CCCCCC)c1cc(C)c(C(=O)CC[NH+](C)C)c(c1)C	EC50	=	15	uM	F	CELL-LINE	HepG2	306.47
O1C2\C=C(/CC\C=C(\CCCCC1(C)C(O)C2C(C)C)/C)\C	IC50	=	20	uM	F	CELL-LINE	HepG2	306.49
[se]1nnc-2c1C1(Oc3c-2cc(O)cc3)CCCC1	IC50	=	60	uM	F	CELL-LINE	HepG2	307.214
O(C)c1cc(ccc1O)\C=N/C1=CC(=O)C(=O)c2c1cccc2	IC50	=	6.37	uM	F	CELL-LINE	HepG2	307.305
O1c2c(C=C(c3nc4n(C=C(N=C4)C)c3CO)C1=O)cccc2	IC50	=	853	uM	F	CELL-LINE	HepG2	307.309
O(C)c1cc(Nc2n[nH]c-3c2Cc2c-3cccc2)ccc1OC	IC50	=	3.8	uM	F	CELL-LINE	HepG2	307.353
O(C)c1cc2Cc3c(n[nH]c3Nc3ccccc3)-c2cc1OC	IC50	=	0.24	uM	F	CELL-LINE	HepG2	307.353
O(C)c1cc(Nc2nc(ccn2)-c2ccc(OC)cc2)ccc1	IC50	=	13.88	uM	F	CELL-LINE	HepG2	307.353
O(C)c1cc(ccc1OC)\C=C\C1=Nc2c(cccc2)C1(C)C	IC50	=	28.59	uM	F	CELL-LINE	HepG2	307.393
[NH+]1(CCCCC1)Cc1n2C=C(N=Cc2nc1-c1ccccc1)C	IC50	=	798	uM	F	CELL-LINE	HepG2	307.421
[nH+]1c2c(cccc2)c(NCC[NH+](C)C)cc1-c1ccc(cc1)C	IC50	=	2.06	uM	F	CELL-LINE	HepG2	307.441
S(=O)(=O)(N[C@H]1O[C@H](COC(=O)C)[C@H](OC(=O)C)C=C1)N	IC50	=	303600	uM	F	CELL-LINE	HepG2	308.311
S(=O)(=O)(N[C@H]1O[C@H](COC(=O)C)[C@@H](OC(=O)C)C=C1)N	IC50	=	336000	uM	F	CELL-LINE	HepG2	308.311
Oc1ccc(cc1)\C=C\C(=O)CC(=O)\C=C\c1ccc(O)cc1	IC50	=	62.9	uM	F	CELL-LINE	HepG2	308.333
O(CC)c1ccc(cc1)C=1NC(=O)N=C(C=1)c1ccccc1O	IC50	=	20.26	uM	F	CELL-LINE	HepG2	308.337
O(C)c1c(cc(cc1C=O)CC=C)-c1cc(CC=C)c(O)cc1	IC50	=	20.9	uM	F	CELL-LINE	HepG2	308.377
s1c2CCCCc2c2c1N=C(NC2=O)\C=C\c1ccccc1	IC50	=	12.01	uM	F	CELL-LINE	HepG2	308.405
O(C(C)C)c1ccc(cc1CC=C)-c1cc(ccc1O)CC=C	IC50	=	48.4	uM	F	CELL-LINE	HepG2	308.421
O(C(C)C)c1ccc(cc1-c1cc(CC=C)c(O)cc1)CC=C	IC50	=	63.5	uM	F	CELL-LINE	HepG2	308.421
O(CCC)c1ccc(cc1-c1cc(CC=C)c(O)cc1)CC=C	IC50	=	49.9	uM	F	CELL-LINE	HepG2	308.421
O(C)c1cc(OCCCCCC)ccc1C(=O)CC[NH+](C)C	EC50	=	62	uM	F	CELL-LINE	HepG2	308.442
O(CCCCCC)c1ccc(cc1OC)C(=O)CC[NH+](C)C	EC50	=	100	uM	F	CELL-LINE	HepG2	308.442
Clc1ccc(cc1)C(CC=C)c1c2c(ccc1O)cccc2	IC50	=	7.4	uM	F	CELL-LINE	HepG2	308.808
[Se]=C(N\N=C\c1nc(sc1)-c1ccccc1)N	IC50	=	9.18	uM	F	CELL-LINE	HepG2	309.258
s1c2c(ncc(c2)C#Cc2ncccc2)c(N)c1C(OC)=O	GI50	=	75.7	uM	F	CELL-LINE	HepG2	309.349
s1cccc1-c1oc(nn1)CCCc1c2c([nH]c1)cccc2	IC50	=	181	uM	F	CELL-LINE	HepG2	309.393
ClC1=C(Nc2ccc(F)cc2F)C(=O)c2c([nH]nc2)C1=O	IC50	=	2	uM	F	CELL-LINE	HepG2	309.659
ClC1=C(Nc2cc(F)cc(F)c2)C(=O)c2c([nH]nc2)C1=O	IC50	=	37.6	uM	F	CELL-LINE	HepG2	309.659
O1C(=O)c2c(ccc(Oc3cc4c(cc3)C(OC4=O)=O)c2)C1=O	IC50	=	121	uM	F	CELL-LINE	HepG2	310.217
Fc1ccc(cc1)-c1nc(ncc1)Nc1ccc([N+](=O)[O-])cc1	IC50	=	7.95	uM	F	CELL-LINE	HepG2	310.288
O1[C@@H](Cc2c(c(O)c(OC)c(OC)c2)C1=O)C[C@@H](O)CCC	IC50	=	120.8	uM	F	CELL-LINE	HepG2	310.346
S=C1NC(=CC(=N1)c1ccccc1O)c1ccccc1OC	IC50	=	164.44	uM	F	CELL-LINE	HepG2	310.377
S=C(N)[N-]\N=C(\C=C\c1ccc(OC)cc1)/c1ccccc1	IC50	=	10	uM	F	CELL-LINE	HepG2	310.401
S=C(N)[N-]\N=C(\C=C\c1ccccc1OC)/c1ccccc1	IC50	=	20	uM	F	CELL-LINE	HepG2	310.401
S=C(N)[N-]\N=C(\C=C\c1cc(OC)ccc1)/c1ccccc1	IC50	=	5.53	uM	F	CELL-LINE	HepG2	310.401
S=C(N)[N-]\N=C(\C=C\c1ccccc1)/c1ccc(OC)cc1	IC50	=	4.38	uM	F	CELL-LINE	HepG2	310.401
O(CCCC)c1cc2n(c3c(c2cc1)ccnc3C)CCCC	IC50	=	15.4882	uM	F	CELL-LINE	HepG2	310.441
O(CCCC)c1cc2n(c3c(c2cc1)ccnc3C)CC(C)C	IC50	=	12.0226	uM	F	CELL-LINE	HepG2	310.441
O(CC(C)C)c1cc2n(c3c(c2cc1)ccnc3C)CCCC	IC50	=	15.3	uM	F	CELL-LINE	HepG2	310.441
O(CC(C)C)c1cc2n(c3c(c2cc1)ccnc3C)CC(C)C	IC50	=	36.8	uM	F	CELL-LINE	HepG2	310.441
P(=O)([O-])([O-])COC1(CC1)Cn1c2nc(nc(c2nc1)C)N	EC50	=	8	uM	F	CELL-LINE	HepG2	311.238
O=C(\C(=C\c1c2c([nH]c1)cccc2)\C#N)c1c2c([nH]c1)cccc2	IC50	=	38.89	uM	F	CELL-LINE	HepG2	311.344
Sc1nnc(n1-c1ccccc1)-c1cc2OCCOc2cc1	IC50	=	60.01	uM	F	CELL-LINE	HepG2	311.365
[nH]1cc(c2c1cccc2C#N)\C=C\C1=Nc2c(cccc2)C1(C)C	IC50	=	3.18	uM	F	CELL-LINE	HepG2	311.388
O=C(NCC[NH3+])c1ncc2n(c3c(c2c1)cccc3)CCCC	IC50	=	83.1764	uM	F	CELL-LINE	HepG2	311.409
O=C(NCCCCCC[NH3+])c1nccc2c1[nH]c1c2cccc1	IC50	=	85.5	uM	F	CELL-LINE	HepG2	311.409
Clc1ccc(Nc2nc(ccn2)-c2ccc(OC)cc2)cc1	IC50	=	4.5	uM	F	CELL-LINE	HepG2	311.772
Clc1cc(OC)c(cc1)C(=O)Nc1ccc(Cl)cc1O	IC50	=	7.34	uM	F	CELL-LINE	HepG2	312.152
Clc1cc(NC(=O)c2ccc(Cl)cc2OC)c(O)cc1	IC50	=	87.02	uM	F	CELL-LINE	HepG2	312.152
Clc1cc(C(=O)Nc2ccc(Cl)cc2O)c(OC)cc1	IC50	=	51.3	uM	F	CELL-LINE	HepG2	312.152
O(C)c1c(OC)cc(cc1OC)C(=O)\C=C\c1ccc(cc1)C	IC50	=	52	uM	F	CELL-LINE	HepG2	312.365
[NH+](CCC[NH2+]Cc1ncc2[nH]c3c(c2c1)cccc3)(CC)CC	IC50	=	93.7	uM	F	CELL-LINE	HepG2	312.461
[NH+]1(CC[NH+](CC1)Cc1ccccc1)CC=1C2CC(CC=1)C2(C)C	IC50	=	64	uM	F	CELL-LINE	HepG2	312.501
[NH+]1(CC[NH+](CC1)Cc1ccccc1)CC=1CC[C@@H](CC=1)C(C)=C	IC50	=	60	uM	F	CELL-LINE	HepG2	312.501
OCC(C)C1CC[NH+](CC1)CCCCCCCCCCCC	IC50	=	0.04	uM	F	CELL-LINE	HepG2	312.562
Clc1cc(OCCCCCC)ccc1C(=O)CC[NH+](C)C	EC50	=	53	uM	F	CELL-LINE	HepG2	312.861
Clc1cc(ccc1OCCCCCC)C(=O)CC[NH+](C)C	EC50	=	32	uM	F	CELL-LINE	HepG2	312.861
P(=O)([O-])([O-])COC1(CC1)Cn1c2nc(nc(O)c2nc1)N	EC50	=	0.5	uM	F	CELL-LINE	HepG2	313.21
O=[N+]([O-])c1ccc(cc1)CNc1[n+]([O-])c2c([n+]([O-])n1)cccc2	IC50	=	7.7	uM	F	CELL-LINE	HepG2	313.273
O=C(Nc1cc2nc3c(nc2cc1)cccc3)c1cc(ccc1)C	IC50	=	16.74	uM	F	CELL-LINE	HepG2	313.36
BrC(C(=O)Nc1cc(ccc1)C(=O)NC(=O)N)C	IC50	=	1.2	uM	F	CELL-LINE	HepG2	314.139
O1c2c(C(=O)C=C1C1(O)C=CC(=O)C=C1)c(OC)cc(OC)c2	IC50	=	5.03	uM	F	CELL-LINE	HepG2	314.293
O(C)c1c(OC)cc(cc1OC)C(=O)\C=C\c1ccc(O)cc1	IC50	=	16	uM	F	CELL-LINE	HepG2	314.337
O(C)c1c(OC)cc(cc1OC)C(=O)\C=C\c1cc(O)ccc1	IC50	=	94	uM	F	CELL-LINE	HepG2	314.337
O1c2c([C@H](O)C[C@H]1c1ccccc1)c(OC)c(C)c(O)c2C=O	IC50	=	143.31	uM	F	CELL-LINE	HepG2	314.337
s1c2c(nc1C)C(=O)C(Nc1ccc(OCC)cc1)=CC2=O	IC50	=	0.00153	uM	F	CELL-LINE	HepG2	314.365
S1CC(OC1COC(=O)NCCC)N1C=CC(=NC1=O)N	EC50	=	5	uM	F	CELL-LINE	HepG2	314.366
O1c2c([C@H](O)C[C@H]1c1ccccc1)c(OC)c(C)c(OC)c2C	IC50	=	135.35	uM	F	CELL-LINE	HepG2	314.381
o1c(ccc1\C=C\C(=O)N[O-])C[NH+](Cc1ccccc1)C(C)C	EC50	=	67.52	uM	F	CELL-LINE	HepG2	314.385
o1c(ccc1\C=C\C(=O)N[O-])C[NH+](Cc1ccccc1)CCC	EC50	=	16.72	uM	F	CELL-LINE	HepG2	314.385
O=C1C=C(Nc2c1c1c(n(cc1)CC1CC1)cc2)c1ccccc1	IC50	=	0.02	uM	F	CELL-LINE	HepG2	314.388
s1c2c(ncc(c2)C#Cc2ccsc2)c(N)c1C(OC)=O	GI50	=	30	uM	F	CELL-LINE	HepG2	314.389
n1(c2c(cccc2)c(\C=C\C2=Nc3c(cccc3)C2(C)C)c1C)C	IC50	=	3.34	uM	F	CELL-LINE	HepG2	314.432
Clc1ccccc1C(=O)N1N=C(CC1c1ccccc1O)C	IC50	=	95.55	uM	F	CELL-LINE	HepG2	314.772
Clc1ccc(cc1)C=1NC(=S)N=C(C=1)c1ccccc1O	IC50	=	49.33	uM	F	CELL-LINE	HepG2	314.796
Clc1ccccc1\C=C\C(=N\[N-]C(=S)N)\c1ccccc1	IC50	=	16	uM	F	CELL-LINE	HepG2	314.82
Clc1ccc(cc1)\C=C\C(=N\[N-]C(=S)N)\c1ccccc1	IC50	=	13	uM	F	CELL-LINE	HepG2	314.82
Clc1ccc(cc1)/C(=N\[N-]C(=S)N)/C=C/c1ccccc1	IC50	=	0.83	uM	F	CELL-LINE	HepG2	314.82
O1[C@H](CO)[C@@H](O)[C@@H](O)[C@@H]1n1c2c(c3c1ncnc3C)cccc2	IC50	=	15	uM	F	CELL-LINE	HepG2	315.329
FC(F)(F)c1cc(ccc1)\C=C\C1=Nc2c(cccc2)C1(C)C	IC50	=	9.54	uM	F	CELL-LINE	HepG2	315.338
FC(F)(F)c1ccc(cc1)\C=C\C1=Nc2c(cccc2)C1(C)C	IC50	=	7.91	uM	F	CELL-LINE	HepG2	315.338
O(C)c1c(OC)cc(cc1OC)\C=C/c1cc(N)c(OC)cc1	IC50	=	0.028	uM	F	CELL-LINE	HepG2	315.369
O(C)c1cc2c([nH+]c3c(cccc3)c2NCc2ccccc2)cc1	IC50	=	0.89	uM	F	CELL-LINE	HepG2	315.396
[n+]1(cc2n(c3c(c2cc1)cccc3)CCCc1ccccc1)CC	IC50	=	92.1	uM	F	CELL-LINE	HepG2	315.44
[n+]1(cc2n(c3c(c2cc1)cccc3)CC(C)C)Cc1ccccc1	IC50	=	36.6	uM	F	CELL-LINE	HepG2	315.44
[n+]1(cc2n(c3c(c2cc1)cccc3)CCCC)Cc1ccccc1	IC50	=	29	uM	F	CELL-LINE	HepG2	315.44
O(C)c1cc(O)c(cc1O)\C=C\C(=O)c1cc(O)c(OC)cc1	IC50	=	20.35	uM	F	CELL-LINE	HepG2	316.309
Fc1ccc(cc1)\C=C\C(=O)c1cc(OC)c(OC)c(OC)c1	IC50	=	22	uM	F	CELL-LINE	HepG2	316.328
O(C)c1c(OC)cc(cc1OC)\C=C/c1cc(O)c(OC)cc1	IC50	=	0.00014	uM	F	CELL-LINE	HepG2	316.353
Oc1c2c(C(=O)C=C([C@H](OCC)C\C=C(\C)/C)C2=O)c(O)cc1	IC50	=	0.42	uM	F	CELL-LINE	HepG2	316.353
o1c(ccc1\C=C\C(=O)N[O-])C[NH+](Cc1ccccc1)CCO	EC50	=	128.12	uM	F	CELL-LINE	HepG2	316.357
S(=O)(=O)(N1N=C(CC1c1ccccc1O)C)c1ccccc1	IC50	=	57.24	uM	F	CELL-LINE	HepG2	316.381
S(C)c1ccc(cc1)COCC#CC(O)c1ccc(F)cc1	GI50	=	31	uM	F	CELL-LINE	HepG2	316.396
O=C1C=C(Nc2c1c1c(n(cc1)CCCC)cc2)c1ccccc1	IC50	=	0.02	uM	F	CELL-LINE	HepG2	316.404
Oc1cc2n(c3c(c2cc1)ccnc3C)CCCc1ccccc1	IC50	=	28.1838	uM	F	CELL-LINE	HepG2	316.404
O(Cc1ccccc1)c1cc2n(c3c(c2cc1)ccnc3C)CC	IC50	=	234.423	uM	F	CELL-LINE	HepG2	316.404
O(C)c1cc2c([nH]cc2\C=C\C2=Nc3c(cccc3)C2(C)C)cc1	IC50	=	23.43	uM	F	CELL-LINE	HepG2	316.404
O1[C@H]2\C=C(\CC\C=C(/CC[C@]3(O[C@H]3CCC2=C(C)C1=O)C)\C)/C	IC50	=	94	uM	F	CELL-LINE	HepG2	316.441
O1[C@@H]2\C=C(\CC\C=C(/CC[C@]3(O[C@@H]3CCC2=C(C)C1=O)C)\C)/C	IC50	=	20	uM	F	CELL-LINE	HepG2	316.441
Oc1ccc2c(cccc2)c1C(CC=C)c1ccc(cc1)C(C)C	IC50	=	15	uM	F	CELL-LINE	HepG2	316.444
Clc1ccc(cc1)C(=O)\C=C\c1oc(cc1)\C=C\C(=O)N[O-]	IC50	=	6.74	uM	F	CELL-LINE	HepG2	316.72
Clc1cc(ccc1)C(=O)\C=C\c1oc(cc1)\C=C\C(=O)N[O-]	IC50	=	54.48	uM	F	CELL-LINE	HepG2	316.72
Clc1cc2c(OC(=CC2=O)c2cc(OC)cc(OC)c2)cc1	IC50	=	1.1	uM	F	CELL-LINE	HepG2	316.74
O1[C@H](CO)[C@@H](O)[C@@H](O)[C@@H]1n1c2ncnc(c2cc1)-c1ccoc1	IC50	=	1.72	uM	F	CELL-LINE	HepG2	317.301
o1cccc1-c1ncnc2n(ccc12)[C@@H]1O[C@H](CO)[C@@H](O)[C@H]1O	IC50	=	0.47	uM	F	CELL-LINE	HepG2	317.301
Oc1cc2CC[C@H]3[C@@H]4CC[C@H](O)[C@]4(CC[C@@H]3c2cc1[N+](=O)[O-])C	IC50	=	19	uM	F	CELL-LINE	HepG2	317.385
S(CCC)c1nc(NC(=O)C)cc(OCc2ccccc2)n1	GI50	=	75.1	uM	F	CELL-LINE	HepG2	317.413
Fc1ccc(N2CC[NH+](CC2)C2CC3C(CC2)CCCC3)cc1	IC50	=	86	uM	F	CELL-LINE	HepG2	317.472
Fc1ccccc1N1CC[NH+](CC1)C1CC2C(CC1)CCCC2	IC50	=	70	uM	F	CELL-LINE	HepG2	317.472
ClC1=C(Nc2ccc(OCC)cc2)C(=O)c2c([nH]nc2)C1=O	IC50	=	11.2	uM	F	CELL-LINE	HepG2	317.732
O1c2c(ccc3c2cccc3)C(=O)C=C1C1(OC)C=CC(=O)C=C1	IC50	=	14.37	uM	F	CELL-LINE	HepG2	318.328
O1c2c(c3c(cc2)cccc3)C(=O)C=C1C1(OC)C=CC(=O)C=C1	IC50	=	9.94	uM	F	CELL-LINE	HepG2	318.328
O1[C@H](CO)[C@@H](O)[C@@H](O)[C@@H]1n1cc(c2c1ncnc2N(C)C)C#C	IC50	=	1.32	uM	F	CELL-LINE	HepG2	318.333
Fc1ccc(cc1)-c1cc(ccc1)\C=C\C(=O)c1ccc(O)cc1	IC50	=	5.12	uM	F	CELL-LINE	HepG2	318.347
S=C(N)[N-]\N=C\1/CC2(Oc3c/1cc(O)cc3)CCCCCC2	IC50	=	1440	uM	F	CELL-LINE	HepG2	318.421
O=C1CC[C@]2([C@@H](CC[C@@]34[C@@H]2CC[C@H](C3)C(C4)=C)C1(CO)CO)C	IC50	=	50	uM	F	CELL-LINE	HepG2	318.457
N=1c2c(cccc2)C(C)(C)C=1\C=C\c1ccc(N(CC)CC)cc1	IC50	=	15.09	uM	F	CELL-LINE	HepG2	318.464
O(CCCCCC)c1ccc(cc1)C(=O)CC[NH+]1CCCCC1	EC50	=	66	uM	F	CELL-LINE	HepG2	318.481
O(CCCCCC)c1cc(C)c(C(=O)CC[NH+]2CC2C)c(c1)C	EC50	=	33	uM	F	CELL-LINE	HepG2	318.481
o1c(nnc1CCc1c2c([nH]c1)cccc2)-c1ccc(OC)cc1	IC50	=	29	uM	F	CELL-LINE	HepG2	319.364
Clc1cc2[nH+]c3c(cccc3)c(NCc3ccccc3)c2cc1	IC50	=	11.64	uM	F	CELL-LINE	HepG2	319.815
O(C)c1cc(O)c2c(c1)C(=O)C1=C(C[C@@H](O)[C@](O)(C)[C@@H]1O)C2=O	IC50	=	8.9	uM	F	CELL-LINE	HepG2	320.297
Fc1ccc(cc1)-c1cc(ccc1)\C=C\C(=O)c1ccc(F)cc1	IC50	=	12.3	uM	F	CELL-LINE	HepG2	320.338
O1C(=CC(OC)=C(C)C1=O)c1cc(cc(C)c1-c1ccccc1)C	IC50	=	62	uM	F	CELL-LINE	HepG2	320.388
O1[C@H](CO)[C@H](O)[C@H](O)[C@@H](O)C1OCCCCCCCCCC	IC50	=	192.4	uM	F	CELL-LINE	HepG2	320.426
O1CC[NH+](CC1)CCC(=O)c1ccc(OCCCCCC)cc1	EC50	=	56	uM	F	CELL-LINE	HepG2	320.453
O(CCCCCC)c1ccc(cc1)C(=O)C(C(C)C)C[NH+](C)C	EC50	=	62	uM	F	CELL-LINE	HepG2	320.497
Clc1cc2[nH]cc(c2cc1)\C=C\C1=Nc2c(cccc2)C1(C)C	IC50	=	9.98	uM	F	CELL-LINE	HepG2	320.823
Clc1ccccc1CSc1sc(nn1)-c1nccnc1	IC50	=	10.78	uM	F	CELL-LINE	HepG2	320.828
Clc1cc(ccc1)CSc1sc(nn1)-c1nccnc1	IC50	=	7.03	uM	F	CELL-LINE	HepG2	320.828
Clc1ccc(cc1)CSc1sc(nn1)-c1nccnc1	IC50	=	6.23	uM	F	CELL-LINE	HepG2	320.828
[se]1nnc-2c1C1(Oc3c-2cc(O)cc3)CCCCC1	IC50	=	90	uM	F	CELL-LINE	HepG2	321.241
S(CCn1c(ncc1[N+](=O)[O-])C)c1oc(nn1)-c1occc1	IC50	=	22.6	uM	F	CELL-LINE	HepG2	321.317
O(C)c1cc(ccc1OC)\C=N/C1=CC(=O)C(=O)c2c1cccc2	IC50	=	9.15	uM	F	CELL-LINE	HepG2	321.332
O=C1c2cc(ccc2N(Cc2ccccc2)C1=O)\C=C\C(OC)=O	IC50	=	0.04	uM	F	CELL-LINE	HepG2	321.332
S(=O)(=O)(N[C@H]1O[C@H](COC(=O)C)[C@H](OC(=O)C)C=C1)CC	IC50	=	192000	uM	F	CELL-LINE	HepG2	321.35
S(=O)(=O)(N[C@H]1O[C@H](COC(=O)C)[C@@H](OC(=O)C)C=C1)CC	IC50	=	231200	uM	F	CELL-LINE	HepG2	321.35
Fc1cc2c(N(C3N(CCc4c3[nH]c3c4cccc3)C2=O)C)cc1	GI50	=	188	uM	F	CELL-LINE	HepG2	321.355
Fc1ccc(cc1)-c1oc(nn1)CCCc1c2c([nH]c1)cccc2	IC50	=	40	uM	F	CELL-LINE	HepG2	321.355
O1c2c(C=CC1(C)C)c(OC)ccc2C(=O)\C=C\c1ncccc1	IC50	=	5.76	uM	F	CELL-LINE	HepG2	321.376
Fc1cc(C(F)(F)F)c(cc1)CC1=CN2C(=NC1=O)C=CC=C2	IC50	=	804	uM	F	CELL-LINE	HepG2	322.261
O(C)c1ccc(cc1)-c1nc(ncc1)Nc1ccc([N+](=O)[O-])cc1	IC50	=	1.04	uM	F	CELL-LINE	HepG2	322.324
O=C1N(N2C(=Nc3c(cc(cc3)C)C2=O)C)C(N)=CC(N)=C1C#N	IC50	=	17	uM	F	CELL-LINE	HepG2	322.328
Oc1c(cc(cc1C=O)CC=C)-c1cc(CC=C)c(O)c(c1)C=O	IC50	=	10.7	uM	F	CELL-LINE	HepG2	322.36
s1c(nnc1SCc1ccc(F)cc1F)-c1nccnc1	IC50	=	9.63	uM	F	CELL-LINE	HepG2	322.363
s1c(nnc1SCc1c(F)cccc1F)-c1nccnc1	IC50	=	6.9	uM	F	CELL-LINE	HepG2	322.363
O(C)c1c(cc(cc1C=O)CC=C)-c1cc(CC=C)c(OC)cc1	IC50	=	53.9	uM	F	CELL-LINE	HepG2	322.404
s1c2CCCCc2c2c1N=C(NC2=O)/C(=C/c1ccccc1)/C	IC50	=	33.19	uM	F	CELL-LINE	HepG2	322.432
S(CCCCCC)c1cc(C)c(C(=O)CC[NH+](C)C)c(c1)C	EC50	=	26	uM	F	CELL-LINE	HepG2	322.537
[NH+]1(CCC[NH+](CC1)C1CCCCCCC1)C1CCCCCCC1	IC50	=	74	uM	F	CELL-LINE	HepG2	322.581
OC=1N(N2C(=Nc3c(cc(cc3)C)C2=O)C)C(=O)C(C#N)=C(N)C=1	IC50	=	41	uM	F	CELL-LINE	HepG2	323.312
s1c2c(ncc(c2)C#Cc2ccc(N)cc2)c(N)c1C(OC)=O	GI50	=	25.9	uM	F	CELL-LINE	HepG2	323.376
s1c2c(ncc(c2)C#Cc2cc(N)ccc2)c(N)c1C(OC)=O	GI50	=	1.2	uM	F	CELL-LINE	HepG2	323.376
O(CCCCCC)c1ccc(cc1[N+](=O)[O-])C(=O)CC[NH+](C)C	EC50	=	43	uM	F	CELL-LINE	HepG2	323.413
S(C)c1ccc(cc1)COCC#CC(O)c1ccc(cc1)C#N	GI50	=	54	uM	F	CELL-LINE	HepG2	323.416
O(C)c1c2c([nH+]c(cc2NCCC)-c2ccccc2)cc(OC)c1	IC50	=	5.21	uM	F	CELL-LINE	HepG2	323.416
S(Cc1ccccc1)c1nc(N)cc(OCc2ccccc2)n1	GI50	=	49	uM	F	CELL-LINE	HepG2	323.42
S(Cc1ccccc1)C1=NC(N)=CC(=O)N1Cc1ccccc1	GI50	=	97.8	uM	F	CELL-LINE	HepG2	323.42
O1O[C@H](CC[C@@]1(CCC1C(CCCC1=C)(C)C)C)[C@H](C(=O)[O-])C	IC50	=	0.9	uM	F	CELL-LINE	HepG2	323.453
Clc1ccc(cc1)-c1oc(nn1)CCc1c2c([nH]c1)cccc2	IC50	=	21	uM	F	CELL-LINE	HepG2	323.783
O1C[C@H]2[C@]34Oc5c(C(=O)C3=C[C@H](C2)C(=O)C14CC=C)c(O)ccc5	IC50	=	9.14	uM	F	CELL-LINE	HepG2	324.332
O1c2c(c3OCCCOc3c(OC)c2)C(=O)C=C1c1ccccc1	IC50	=	69	uM	F	CELL-LINE	HepG2	324.332
O(C)c1cc(ccc1OC)C=1NC(=O)N=C(C=1)c1ccccc1O	IC50	=	259.67	uM	F	CELL-LINE	HepG2	324.336
o1c(ccc1\C=C\C(=O)N[O-])\C=C\C(=O)c1ccc(cc1)C(C)C	IC50	=	35.9	uM	F	CELL-LINE	HepG2	324.356
O=C1N(CC[NH+](C)C)C(=O)c2c3c1cc1nnn(c1c3ccc2)C	IC50	=	0.68	uM	F	CELL-LINE	HepG2	324.364
S=C1NC(=CC(=N1)c1ccccc1O)c1ccc(OCC)cc1	IC50	=	80.52	uM	F	CELL-LINE	HepG2	324.404
O(C(CC)CC)c1cc2n(c3c(c2cc1)ccnc3C)CCCC	IC50	=	15.6	uM	F	CELL-LINE	HepG2	324.468
S(C)c1cc(ccc1OCCCCCC)C(=O)CC[NH+](C)C	EC50	=	29	uM	F	CELL-LINE	HepG2	324.509
Clc1cc(OCCCCCC)ccc1C(=O)CC[NH+]1CC1C	EC50	=	51	uM	F	CELL-LINE	HepG2	324.872
[Se](\C(=N/C(=O)c1occc1)\NC(=O)c1occc1)C	GI50	=	0.76	uM	F	CELL-LINE	HepG2	325.185
O=C(\C(=C\c1c2c([nH]c1)cccc2)\C#N)c1c2c(n(c1)C)cccc2	IC50	=	7.07	uM	F	CELL-LINE	HepG2	325.371
S=C(N)[N-]\N=C(\C=C\c1cc([N+](=O)[O-])ccc1)/c1ccccc1	IC50	=	2.64	uM	F	CELL-LINE	HepG2	325.372
S=C(N)[N-]\N=C(\C=C\c1ccc([N+](=O)[O-])cc1)/c1ccccc1	IC50	=	1.05	uM	F	CELL-LINE	HepG2	325.372
OCCNC(=O)c1nc(c2n(c3c(c2c1)cccc3)CCCC)C	IC50	=	141.254	uM	F	CELL-LINE	HepG2	325.412
s1c(C(=O)C)c(nc1NNS(=O)(=O)c1ccc(cc1)C)C	IC50	=	8.77	uM	F	CELL-LINE	HepG2	325.413
O=C(NN)c1n(nc(c1)-c1c2c(n(c1)CCC)cccc2)CCC	IC50	=	3.91	uM	F	CELL-LINE	HepG2	325.416
O=C(NCC[NH3+])c1nc(c2n(c3c(c2c1)cccc3)CCCC)C	IC50	=	21.8776	uM	F	CELL-LINE	HepG2	325.436
O=C(NCCC[NH+](CC)CC)c1nccc2c1[nH]c1c2cccc1	IC50	=	243	uM	F	CELL-LINE	HepG2	325.436
Brc1ccc(cc1)\C=C\C1=Nc2c(cccc2)C1(C)C	IC50	=	9.92	uM	F	CELL-LINE	HepG2	326.237
O1c2c(C=CC1(C)C)cc1c(Oc3c(C1=O)c(O)cc(O)c3)c2O	IC50	=	10.1	uM	F	CELL-LINE	HepG2	326.304
O=C1C=2C(=Nc3n(ncn3)C=2c2ccccc2)c2c(cccc2)C1=O	IC50	=	3.45	uM	F	CELL-LINE	HepG2	326.315
o1c2c(nc1C(n1nnc(c1)\C=C\C(=O)N[O-])C(C)C)cccc2	GI50	=	1	uM	F	CELL-LINE	HepG2	326.336
Fc1ccc(-n2ncc3C[C@]4(C(CCC45OCCO5)=Cc23)C)cc1	EC50	=	0.211	uM	F	CELL-LINE	HepG2	326.371
S(Cc1ccccc1)c1oc(nn1)-c1cc2OCCOc2cc1	IC50	=	32.14	uM	F	CELL-LINE	HepG2	326.376
S1CC(OC1CO)N1C=CC(=NC1=O)\N=C\N1CCOCC1	EC50	=	0.05	uM	F	CELL-LINE	HepG2	326.377
O1[C@@H]2O[C@@]3(OO[C@]24[C@@H](CC[C@H]([C@@H]4CC3)C)[C@@H](C)[C@H]1OC(=O)C)C	IC50	=	60	uM	F	CELL-LINE	HepG2	326.389
O1c2cc(ccc2OC1)C[C@H]([C@H](Cc1cc2OCOc2cc1)C)C	IC50	=	175.3	uM	F	CELL-LINE	HepG2	326.392
[NH+](CCC[NH2+]Cc1ncc2n(c3c(c2c1)cccc3)C)(CC)CC	IC50	=	96.1	uM	F	CELL-LINE	HepG2	326.488
Clc1cc(Nc2ncnc3c2cc(NCCCC)cc3)ccc1	IC50	=	7.85	uM	F	CELL-LINE	HepG2	326.831
[Se](\C(=N/C(=O)c1oncc1)\NC(=O)c1oncc1)C	GI50	=	0.51	uM	F	CELL-LINE	HepG2	327.161
O=C1c2cc([nH]c2-c2c(nc(cc2C(=O)[O-])C(=O)[O-])C1=O)C(=O)[O-]	IC50	=	45.71	uM	F	CELL-LINE	HepG2	327.184
Fc1ccc(cc1)-c1nc2n(C=C(N=C2)C)c1C[NH+]1CCOCC1	IC50	=	871	uM	F	CELL-LINE	HepG2	327.383
Clc1cc(NC(=S)c2ccc(Cl)cc2OC)c(O)cc1	IC50	=	8.49	uM	F	CELL-LINE	HepG2	328.219
Clc1cc(C(=S)Nc2ccc(Cl)cc2O)c(OC)cc1	IC50	=	4.45	uM	F	CELL-LINE	HepG2	328.219
Clc1cc(C(=S)Nc2cc(Cl)ccc2O)c(OC)cc1	IC50	=	8.6	uM	F	CELL-LINE	HepG2	328.219
Clc1cc(OC)c(cc1)C(=S)Nc1ccc(Cl)cc1O	IC50	=	5.11	uM	F	CELL-LINE	HepG2	328.219
O1c2c(C(=O)C=C1C1(OC)C=CC(=O)C=C1)c(OC)cc(OC)c2	IC50	=	27.01	uM	F	CELL-LINE	HepG2	328.32
O1c2c(C(=O)C=C1c1cc(OC)c(OC)cc1)c(O)cc(OC)c2	IC50	=	15	uM	F	CELL-LINE	HepG2	328.32
O(C)c1c(OC)cc(cc1OC)C(=O)\C=C\c1cc(OC)ccc1	IC50	=	1.8	uM	F	CELL-LINE	HepG2	328.364
O(C)c1c(OC)cc(cc1OC)C(=O)\C=C\c1ccc(OC)cc1	IC50	=	49.5	uM	F	CELL-LINE	HepG2	328.364
O1c2c([C@H](O)C[C@H]1c1ccccc1)c(OC)c(C)c(OC)c2C=O	IC50	=	99.6	uM	F	CELL-LINE	HepG2	328.364
O1c2c([C@H](OC)C[C@H]1c1ccccc1)c(OC)c(C)c(O)c2C=O	IC50	=	144.81	uM	F	CELL-LINE	HepG2	328.364
O(C)c1ccc(cc1)-c1nccc(c1)-c1c[nH]nc1-c1ncccc1	IC50	=	0.537	uM	F	CELL-LINE	HepG2	328.375
S1CC(OC1COC(=O)NCCCC)N1C=CC(=NC1=O)N	EC50	=	1	uM	F	CELL-LINE	HepG2	328.393
O1[C@@H]\2[C@H](CC\C(=C/CCC3=C[C@H](OC3=O)C\C(=C/2)\C)\C)C(=C)C1=O	IC50	=	10	uM	F	CELL-LINE	HepG2	328.408
o1c(ccc1\C=C\C(=O)N[O-])C[NH+](Cc1ccccc1)CC(C)C	EC50	=	27.68	uM	F	CELL-LINE	HepG2	328.412
o1c(ccc1\C=C\C(=O)N[O-])C[NH+](Cc1ccccc1)CCCC	EC50	=	24.3	uM	F	CELL-LINE	HepG2	328.412
O(C(=O)[C@]1([C@H]2CC[C@]34C=C([C@H](CC=C3[C@@]2(CCC1)C)C4)C=O)C)C	IC50	=	25	uM	F	CELL-LINE	HepG2	328.452
O(CCCCCC)c1c2c(cccc2)c(cc1)C(=O)CC[NH+](C)C	EC50	=	38	uM	F	CELL-LINE	HepG2	328.476
O(CCCCCC)c1cc2c(cc(cc2)C(=O)CC[NH+](C)C)cc1	EC50	=	65	uM	F	CELL-LINE	HepG2	328.476
Clc1cc(SCCCCCC)ccc1C(=O)CC[NH+](C)C	EC50	=	36	uM	F	CELL-LINE	HepG2	328.928
S(CC(=O)N\N=C\c1occc1)c1oc(nn1)-c1ccncc1	IC50	=	12.47	uM	F	CELL-LINE	HepG2	329.34
s1c2nc(ccc2c(N)c1C(=O)N)-c1cc(OC)c(OC)cc1	IC50	=	0.72	uM	F	CELL-LINE	HepG2	329.38
s1c2c(nccc2)c(Nc2ccc(OC)cc2N)c1C(OC)=O	GI50	=	1	uM	F	CELL-LINE	HepG2	329.38
S=C1OC(=NN1C[NH+]1CCOCC1)c1nc2c(cc1)cccc2	IC50	=	24.9	uM	F	CELL-LINE	HepG2	329.404
S1c2c(-n3c1nc(-c1ccccc1)c3Cn1cccc1)cccc2	IC50	=	3.01	uM	F	CELL-LINE	HepG2	329.427
ClCC(=O)Nc1cc2sc(SCC(=O)NC)nc2cc1	IC50	=	1.9	uM	F	CELL-LINE	HepG2	329.832
Clc1cc(Cl)ccc1\C=N/C1=CC(=O)C(=O)c2c1cccc2	IC50	=	15.73	uM	F	CELL-LINE	HepG2	330.17
Clc1cc(Cl)ccc1-c1nc(ncc1)Nc1cc(ccc1)C	IC50	=	13.15	uM	F	CELL-LINE	HepG2	330.218
Clc1cc(Cl)ccc1Nc1nc(ccn1)-c1ccc(cc1)C	IC50	=	344.1	uM	F	CELL-LINE	HepG2	330.218
O1c2c(C(=O)C=C1C1(O)C=CC(=O)C=C1)c(O)cc(OCOC)c2	IC50	=	15.58	uM	F	CELL-LINE	HepG2	330.292
Oc1c2c(C(=O)C=C([C@H](OC(=O)C)C\C=C(\C)/C)C2=O)c(O)cc1	IC50	=	0.38	uM	F	CELL-LINE	HepG2	330.336
Oc1c2c(C(=O)C=C([C@@H](OC(=O)C)C\C=C(\C)/C)C2=O)c(O)cc1	IC50	=	0.39	uM	F	CELL-LINE	HepG2	330.336
O(C)c1c(OC)cc(cc1OC)C(=O)\C=C\c1cc(O)c(O)cc1	IC50	=	14.9	uM	F	CELL-LINE	HepG2	330.336
S1CC(OC1COC(=O)NCCCO)N1C=CC(=NC1=O)N	EC50	=	1	uM	F	CELL-LINE	HepG2	330.365
S1CC(OC1COC(=O)NCCC[NH3+])N1C=CC(=NC1=O)N	EC50	=	1	uM	F	CELL-LINE	HepG2	330.389
S(=O)(=O)(N1N=C(CC1c1ccccc1O)C)c1ccc(cc1)C	IC50	=	66.77	uM	F	CELL-LINE	HepG2	330.408
O1C2(C34OC(CC(=O)C3=CC(CC4C1(C)C)C2=O)C)C\C=C(\C)/C	IC50	=	95	uM	F	CELL-LINE	HepG2	330.424
O=C1C=C(Nc2c1c1c(n(cc1)CCCCC)cc2)c1ccccc1	IC50	=	0.03	uM	F	CELL-LINE	HepG2	330.431
S=C(N)[N-]\N=C(\C=C\c1c2c(ccc1)cccc2)/c1ccccc1	IC50	=	0.81	uM	F	CELL-LINE	HepG2	330.435
O=C1[C@@]23[C@@H](CC[C@H](C2)C1=C)[C@]1([C@H](CC3)[C@@](CCC1)(C(OC)=O)C)C	IC50	=	75	uM	F	CELL-LINE	HepG2	330.468
O1[C@H](CO)[C@@H](O)[C@@H](O)[C@@H]1n1cc(c2c1ncnc2C)-c1ccoc1	IC50	=	5.32	uM	F	CELL-LINE	HepG2	331.328
o1cccc1-c1c2c(ncnc2C)n(c1)[C@@H]1O[C@H](CO)[C@@H](O)[C@H]1O	IC50	=	0.3	uM	F	CELL-LINE	HepG2	331.328
S(CCn1c(ncc1[N+](=O)[O-])C)c1oc(nn1)-c1ccccc1	IC50	=	17.5	uM	F	CELL-LINE	HepG2	331.356
S1CC(OC1COC(OCCC[NH3+])=O)N1C=CC(=NC1=O)N	EC50	=	0.5	uM	F	CELL-LINE	HepG2	331.373
O(C)c1c2c(nc(cc2-n2ccnc2)-c2ccccc2)cc(OC)c1	IC50	=	58.64	uM	F	CELL-LINE	HepG2	331.375
O=[N+]([O-])c1c2[nH]cc(c2ccc1)\C=C\C1=Nc2c(cccc2)C1(C)C	IC50	=	4	uM	F	CELL-LINE	HepG2	331.375
O=C1[C@@]23[C@@H](CC[C@](O)(C2)C1=C)[C@]1([C@H](CC3)[C@@](CCC1)(C(=O)[O-])C)C	IC50	=	3.69	uM	F	CELL-LINE	HepG2	331.432
S(Cc1ccccc1)c1nc(NC(=O)C)cc(OCC(C)C)n1	GI50	=	64.4	uM	F	CELL-LINE	HepG2	331.44
S(Cc1ccccc1)C1=NC(NC(=O)C)=CC(=O)N1CC(C)C	GI50	=	67.6	uM	F	CELL-LINE	HepG2	331.44
S(CC)[C@H]1[C@@H](SCC)[C@@H](O[C@@H]1CO)N1C=CC(=NC1=O)N	EC50	=	115.76	uM	F	CELL-LINE	HepG2	331.461
Clc1nc(nc2n(cnc12)CC1(OCP(=O)([O-])[O-])CC1)N	EC50	=	1.5	uM	F	CELL-LINE	HepG2	331.656
O1[C@H](CO)[C@@H](O)[C@H](O)[C@@H]1n1cc(c2c1ncnc2N)-c1ccoc1	IC50	=	6.1	uM	F	CELL-LINE	HepG2	332.316
o1cccc1-c1c2c(ncnc2N)n(c1)[C@@H]1O[C@H](CO)[C@@H](O)[C@@H]1O	IC50	=	6.62	uM	F	CELL-LINE	HepG2	332.316
o1c(ccc1\C=C\C(=O)N[O-])\C=C\C(=O)c1cc2c(cc1)cccc2	IC50	=	9.93	uM	F	CELL-LINE	HepG2	332.335
s1cccc1C=1n2ncnc2N=C2C=1C(=O)C(=O)c1c2cccc1	IC50	=	2.13	uM	F	CELL-LINE	HepG2	332.343
S(CCn1c(ncc1[N+](=O)[O-])C)c1oc(nn1)-c1ccncc1	IC50	=	14.8	uM	F	CELL-LINE	HepG2	332.344
S(CCn1c(ncc1[N+](=O)[O-])C)c1oc(nn1)-c1cccnc1	IC50	=	9.6	uM	F	CELL-LINE	HepG2	332.344
S(CCn1c(ncc1[N+](=O)[O-])C)c1oc(nn1)-c1ncccc1	IC50	=	20.2	uM	F	CELL-LINE	HepG2	332.344
Fc1ccc(cc1)-c1cc(ccc1)C(=O)\C=C\c1ccc(OC)cc1	IC50	=	5.65	uM	F	CELL-LINE	HepG2	332.374
Fc1cc(ccc1)-c1cc(ccc1)C(=O)\C=C\c1ccccc1OC	IC50	=	15.36	uM	F	CELL-LINE	HepG2	332.374
Fc1cc(ccc1)-c1cc(ccc1)C(=O)\C=C\c1ccc(OC)cc1	IC50	=	1.72	uM	F	CELL-LINE	HepG2	332.374
O1c2c(OC1)cc1[C@@]34[C@@H]([N+](C[C@@H]3O)(C)C(O)c1c2)C[C@H](OC)C=C4	IC50	=	1.5	uM	F	CELL-LINE	HepG2	332.376
O=C1c2cc(NC(=O)C[NH+](C)C)ccc2-c2nccc3c2c1ccc3	IC50	=	9.69	uM	F	CELL-LINE	HepG2	332.383
O=C1[C@@]23[C@@H](CC[C@H]([C@H]2O)C1=C)[C@]1([C@H](C[C@H]3O)[C@](CCC1)(C=O)C)C	IC50	=	13.31	uM	F	CELL-LINE	HepG2	332.44
O1C(C)(C)C(=O)C=C1C(CCC\C(=C\C1OC(=O)C=C(C1)C)\C)C	IC50	=	3.62	uM	F	CELL-LINE	HepG2	332.44
S(CC)[C@H]1[C@@H](SCC)[C@@H](O[C@@H]1CO)N1C=CC(=O)NC1=O	EC50	=	74.74	uM	F	CELL-LINE	HepG2	332.445
Clc1cc(Cl)ccc1C=1NC(=O)N=C(C=1)c1ccccc1O	IC50	=	167.66	uM	F	CELL-LINE	HepG2	333.174
O1[C@H](CO)[C@@H](O)[C@@H](O)[C@@H]1n1cc(c2c1N=CNC2=O)-c1ccoc1	IC50	=	12.1	uM	F	CELL-LINE	HepG2	333.3
s1cc(cc1)-c1ncnc2n(ccc12)[C@@H]1O[C@H](CO)[C@@H](O)[C@H]1O	IC50	=	3.22	uM	F	CELL-LINE	HepG2	333.368
s1cccc1-c1ncnc2n(ccc12)[C@@H]1O[C@H](CO)[C@@H](O)[C@H]1O	IC50	=	1.19	uM	F	CELL-LINE	HepG2	333.368
Oc1c2c(ccc1)C(=O)C=C(N1CCC(CC1)c1ccccc1)C2=O	IC50	=	9.7	uM	F	CELL-LINE	HepG2	333.387
Clc1ccccc1C(=O)Nc1cc2nc3c(nc2cc1)cccc3	IC50	=	16.46	uM	F	CELL-LINE	HepG2	333.778
o1c(nnc1CCc1c2c([nH]c1)cccc2)-c1ccc([N+](=O)[O-])cc1	IC50	=	62	uM	F	CELL-LINE	HepG2	334.335
O(C)c1c(OC)cc(cc1OC)-c1nccc2c1[nH]c1c2cccc1	IC50	=	63.2	uM	F	CELL-LINE	HepG2	334.375
Oc1c2c(ccc1)C(=O)C=C(N1CCN(CC1)c1ccccc1)C2=O	IC50	=	5.4	uM	F	CELL-LINE	HepG2	334.375
O(C)c1cc(ccc1O)\C=C\C(=O)\C=C\c1nc2c(n1C)cccc2	IC50	=	2.9	uM	F	CELL-LINE	HepG2	334.375
O(C)c1ccc(cc1O)\C=C\C(=O)\C=C\c1nc2c(n1C)cccc2	IC50	=	2.9	uM	F	CELL-LINE	HepG2	334.375
O1c2cc(OCC(O)C[NH+]3CCCCC3)c(OC)cc2C=CC1=O	IC50	=	83.9	uM	F	CELL-LINE	HepG2	334.392
S=C1OC(=NN1CNc1ccccc1)c1nc2c(cc1)cccc2	IC50	=	35.6	uM	F	CELL-LINE	HepG2	334.403
O(C)c1cc(cc(OC)c1)\C=C\1/CCC\C(=C/c2ccccc2)\C/1=O	IC50	=	4.74	uM	F	CELL-LINE	HepG2	334.415
O1[C@H](CO)[C@H](O)[C@H](O)[C@@H](O)[C@H]1OCCCCCCCCCCC	IC50	=	150.6	uM	F	CELL-LINE	HepG2	334.453
O1[C@H](CO)[C@H](O)[C@H](O)[C@@H](O)[C@@H]1OCCCCCCCCCCC	IC50	=	200.3	uM	F	CELL-LINE	HepG2	334.453
O1[C@H](CO)[C@H](O)[C@H](O)[C@@H](O)C1OCCCCCCCCCCC	IC50	=	68.2	uM	F	CELL-LINE	HepG2	334.453
O1C(=O)C(=CC1O)[C@H](O)C[C@@H]1[C@@]2([C@@H](CCC1=C)C(CCC2)(C)C)C	IC50	=	25.33	uM	F	CELL-LINE	HepG2	334.456
O=C1[C@@]23[C@@H](CC[C@H]([C@H]2O)C1=C)[C@]1([C@H](C[C@H]3O)[C@](CCC1)(CO)C)C	IC50	=	13.17	uM	F	CELL-LINE	HepG2	334.456
O1[C@]23[C@@H](CC[C@@](O)(C2)C(=C)C1=O)[C@]1([C@@H](CC3)[C@](CCC1)(CO)C)C	IC50	=	0.09	uM	F	CELL-LINE	HepG2	334.456
OC=1C=2[C@@](CC[C@H](O)C=2CO)(CC[C@]2(C=1CC(=O)[C@@H]2C(C)C)C)C	IC50	=	25.9	uM	F	CELL-LINE	HepG2	334.456
[nH+]1c2c([nH]c3c2cccc3)c(NCC[NH+](CC)CC)c2c1cccc2	IC50	=	0.2	uM	F	CELL-LINE	HepG2	334.467
O(CCCCCC)c1ccc(cc1)C(=O)CC[NH+]1CC[NH+](CC1)C	EC50	=	54	uM	F	CELL-LINE	HepG2	334.504
O(CCCCCC)c1ccc(cc1C(C)(C)C)C(=O)CC[NH+](C)C	EC50	=	16	uM	F	CELL-LINE	HepG2	334.524
O(CCCCCC)c1cc(C(C)C)c(cc1C)C(=O)CC[NH+](C)C	EC50	=	26	uM	F	CELL-LINE	HepG2	334.524
S(CCCCCC)c1cc(C)c(C(=O)CC[NH+]2CC2C)c(c1)C	EC50	=	35	uM	F	CELL-LINE	HepG2	334.548
Clc1ccc(NC(=O)NCCc2cc(OC)c(OC)cc2)cc1	IC50	=	52.78	uM	F	CELL-LINE	HepG2	334.803
[se]1nnc-2c1C1(Oc3c-2cc(O)cc3)CCCCCC1	IC50	=	1150	uM	F	CELL-LINE	HepG2	335.268
O=C1C=2N3C[C@@H]4[NH2+][C@@H]4[C@]3(OC)[C@@H](C=2C(=O)C(N)=C1C)COC(=O)N	IC50	=	0.27	uM	F	CELL-LINE	HepG2	335.34
O=C1c2cc(ccc2N(Cc2ccc(cc2)C)C1=O)\C=C\C(OC)=O	IC50	=	0.04	uM	F	CELL-LINE	HepG2	335.359
O1CCOc2c1cc(Nc1n[nH]c-3c1Cc1c-3cccc1OC)cc2	IC50	=	7	uM	F	CELL-LINE	HepG2	335.363
S=C1OC(=NN1CNc1ncccc1)c1nc2c(cc1)cccc2	IC50	=	27.6	uM	F	CELL-LINE	HepG2	335.391
Fc1ccc(cc1)Cn1c2c(c3c1cccc3)ccnc2NCC[NH3+]	IC50	=	4.4	uM	F	CELL-LINE	HepG2	335.406
O1c2c(cc(cc2)C[NH+]2CCCCC2)C(=O)C=C1c1ccc(N)cc1	IC50	=	2.64	uM	F	CELL-LINE	HepG2	335.427
O(C)c1ccc(cc1)CN1c2c(cc(cc2)\C=C\C(=O)N)C(=O)C1=O	IC50	=	0.89	uM	F	CELL-LINE	HepG2	336.347
O1c2c(OC1)cc-1c(CC[n+]3c-1cc1c(c3)c(OC)c(OC)cc1)c2	IC50	=	11.22	uM	F	CELL-LINE	HepG2	336.367
O1C[C@H]2[C@]34Oc5c(cccc5)C(=O)C3=C[C@H](C2)C(=O)C14C\C=C(\C)/C	IC50	=	12.4	uM	F	CELL-LINE	HepG2	336.387
Clc1ccc(cc1)\C=C\C(=O)c1cc(ccc1)-c1cc(F)ccc1	IC50	=	10.41	uM	F	CELL-LINE	HepG2	336.793
Brc1ccc(cc1)\C=C(/Cn1nnnc1)\C(OCC)=O	IC50	=	4.89	uM	F	CELL-LINE	HepG2	337.177
Brc1ccccc1\C=C(/Cn1nnnc1)\C(OCC)=O	IC50	=	3.33	uM	F	CELL-LINE	HepG2	337.177
O(C)c1cc(ccc1O)\C=C\C(\[O-])=C\C(=O)\C=C\c1ccc(O)cc1	IC50	=	80.02	uM	F	CELL-LINE	HepG2	337.351
Fc1cc2c(N(C3N(CCc4c3[nH]c3c4cc(O)cc3)C2=O)C)cc1	GI50	=	23.8	uM	F	CELL-LINE	HepG2	337.354
O(C)c1ccc(cc1)CN1c2c(CC1=O)cc(cc2)\C=C\C(OC)=O	IC50	=	9.17	uM	F	CELL-LINE	HepG2	337.375
s1cccc1-c1oc(SCCn2c(ncc2[N+](=O)[O-])C)nn1	IC50	=	20.5	uM	F	CELL-LINE	HepG2	337.384
s1c2c(ncc(c2)-c2cc3c(n(cc3)C)cc2)c(N)c1C(OC)=O	GI50	=	117.2	uM	F	CELL-LINE	HepG2	337.403
O(C)c1c(OC)cc(cc1OC)\C=C\C1=Nc2c(cccc2)C1(C)C	IC50	=	10.81	uM	F	CELL-LINE	HepG2	337.419
O(C)c1c2c([nH+]c(cc2NCCCC)-c2ccccc2)cc(OC)c1	IC50	=	4.46	uM	F	CELL-LINE	HepG2	337.443
Clc1cc2[nH+]c3c(cc(OC)cc3)c(Nc3cc[nH+]cc3)c2cc1	IC50	=	4.1	uM	F	CELL-LINE	HepG2	337.81
Clc1c2[nH]c3c(CCN4C3N(c3c(cccc3)C4=O)C)c2ccc1	GI50	=	2.31	uM	F	CELL-LINE	HepG2	337.81
Clc1cc(ccc1)-c1oc(nn1)CCCc1c2c([nH]c1)cccc2	IC50	=	28	uM	F	CELL-LINE	HepG2	337.81
Clc1ccc(cc1)-c1oc(nn1)CCCc1c2c([nH]c1)cccc2	IC50	=	41	uM	F	CELL-LINE	HepG2	337.81
Clc1cc(ccc1Cl)-c1nc2sc(C(=O)N)c(N)c2cc1	IC50	=	0.29	uM	F	CELL-LINE	HepG2	338.218
O(C)c1c(OC)cc(N2C(=CC=CC2=O)c2ccncc2)cc1OC	IC50	=	1.783	uM	F	CELL-LINE	HepG2	338.363
O=C1N(CCC[NH+](C)C)C(=O)c2c3c1cc1nnn(c1c3ccc2)C	IC50	=	0.97	uM	F	CELL-LINE	HepG2	338.391
O[C@]1([C@@H]2CC[C@@H]3[C@@](C1)(C[C@@H](O)[C@H]1[C@]3(C[C@H](O)CC1(C)C)C)C2)CO	IC50	=	82.43	uM	F	CELL-LINE	HepG2	338.488
O1O[C@H](CC[C@]1(CCC1C(CCCC1=C)(C)C)C)[C@H](C(OC)=O)C	IC50	=	2.9	uM	F	CELL-LINE	HepG2	338.488
Brc1cc(ccc1)-c1nc2c(c3c([nH]cc3)cc2)c(O)c1	IC50	=	6	uM	F	CELL-LINE	HepG2	339.192
Fc1ccc(cc1)CN1c2c(cc(cc2)\C=C\C(OC)=O)C(=O)C1=O	IC50	=	0.04	uM	F	CELL-LINE	HepG2	339.322
Oc1ccc(cc1)-c1nc2c(c3c1-c1c(cc(O)cc1)C3=O)cccc2	GI50	=	9.12	uM	F	CELL-LINE	HepG2	339.35
O(C)c1c(OC)cc(cc1OC)C=1N(C(=O)C=CC=1)c1cc[nH+]cc1	IC50	=	2.524	uM	F	CELL-LINE	HepG2	339.371
O=C1c2c(cccc2NC(=O)C[NH2+]CCCO)C(=O)c2c1cccc2	IC50	=	22.96	uM	F	CELL-LINE	HepG2	339.371
S(CC(=O)N\N=C\c1ccccc1)c1oc(nn1)-c1ccncc1	IC50	=	17.31	uM	F	CELL-LINE	HepG2	339.379
OCC(C)C1CCN(CC1)C(=O)CCCCCCCCCCCC	IC50	=	0.012	uM	F	CELL-LINE	HepG2	339.564
Brc1cc(ccc1)\C=N/C1=CC(=O)C(=O)c2c1cccc2	IC50	=	12.19	uM	F	CELL-LINE	HepG2	340.176
Brc1ccc(S(=O)([O-])=NC(=O)c2cccnc2)cc1	IC50	=	6.7	uM	F	CELL-LINE	HepG2	340.177
Brc1ccc(S(=O)([O-])=NC(=O)c2ccncc2)cc1	IC50	=	6.3	uM	F	CELL-LINE	HepG2	340.177
Brc1ccc(S(=O)([O-])=NC(=O)c2ncccc2)cc1	IC50	=	5	uM	F	CELL-LINE	HepG2	340.177
Brc1ccc(cc1)-c1nc(ncc1)Nc1cc(ccc1)C	IC50	=	74.57	uM	F	CELL-LINE	HepG2	340.224
O1C[C@]1(C)[C@@H]1Oc2cc(OC)c3c(Oc4c(cccc4O)C3=O)c2C1	IC50	=	0.38	uM	F	CELL-LINE	HepG2	340.331
O=C1C=2C(=Nc3n(ncn3)C=2c2ccc(cc2)C)c2c(cccc2)C1=O	IC50	=	1.19	uM	F	CELL-LINE	HepG2	340.342
o1c2c(nc1C(n1nnc(c1)\C=C\C(=O)N[O-])C(CC)C)cccc2	GI50	=	1.7	uM	F	CELL-LINE	HepG2	340.363
o1c2c(nc1C(n1nnc(c1)\C=C\C(=O)N[O-])CC(C)C)cccc2	GI50	=	2.2	uM	F	CELL-LINE	HepG2	340.363
S(Cc1cc(ccc1)C)c1oc(nn1)-c1cc2OCCOc2cc1	IC50	=	33.37	uM	F	CELL-LINE	HepG2	340.403
S(Cc1ccccc1C)c1oc(nn1)-c1cc2OCCOc2cc1	IC50	=	22.02	uM	F	CELL-LINE	HepG2	340.403
S(Cc1ccc(cc1)C)c1oc(nn1)-c1cc2OCCOc2cc1	IC50	=	41.9	uM	F	CELL-LINE	HepG2	340.403
S=C1NC(=CC(=N1)c1ccccc1O)c1cc(OC)c(OC)cc1	IC50	=	27.97	uM	F	CELL-LINE	HepG2	340.403
O(C)c1cc(ccc1OC)CCC(=O)\C=C\[C@H](O)Cc1ccccc1	IC50	=	32.56	uM	F	CELL-LINE	HepG2	340.419
O(C)c1cc(ccc1OC)CCC(=O)\C=C\[C@@H](O)Cc1ccccc1	IC50	=	53.53	uM	F	CELL-LINE	HepG2	340.419
O(C)c1ccc(cc1)C(c1c2c(ccc1O)cccc2)c1ccccc1	IC50	=	6.2	uM	F	CELL-LINE	HepG2	340.422
O1[C@@H]2O[C@@]3(OO[C@]24[C@@H](CC[C@H]([C@@H]4CC3)C)[C@@H](C)[C@H]1OC(CC)C)C	IC50	=	50	uM	F	CELL-LINE	HepG2	340.46
O(C)c1cc(cc(OC)c1)\C=C\1/CCC\C(=C/C2CCCCC2)\C/1=O	IC50	=	17.17	uM	F	CELL-LINE	HepG2	340.463
S(C)c1ccc(cc1)COCC#CC(O)c1ccc(cc1)C(C)C	GI50	=	22	uM	F	CELL-LINE	HepG2	340.487
[NH+](CCC[NH2+]Cc1nccc2c1n(c1c2cccc1)CCCC)(C)C	IC50	=	26.2	uM	F	CELL-LINE	HepG2	340.515
[NH+](CCC[NH2+]Cc1nccc2c1n(c1c2cccc1)CC(C)C)(C)C	IC50	=	28.3	uM	F	CELL-LINE	HepG2	340.515
[se]1cc(nc1N(\N=C\c1ccc(Cl)cc1)C(=O)C)C	IC50	=	59.24	uM	F	CELL-LINE	HepG2	340.675
Clc1cc(SCCCCCC)ccc1C(=O)CC[NH+]1CC1C	EC50	=	55	uM	F	CELL-LINE	HepG2	340.939
P(=O)([O-])([O-])COC1(CC1)Cn1c2nc(nc(OCC)c2nc1)N	EC50	=	0.5	uM	F	CELL-LINE	HepG2	341.264
o1ncc(c1-c1cc(OC)c(OC)c(OC)c1)-c1ccc(OC)cc1	IC50	=	0.0044	uM	F	CELL-LINE	HepG2	341.363
o1ncc(c1-c1ccc(OC)cc1)-c1cc(OC)c(OC)c(OC)c1	IC50	=	0.396	uM	F	CELL-LINE	HepG2	341.363
O(C)c1c(OC)cc(cc1OC)C(=O)\C=C\c1ccc(N(C)C)cc1	IC50	=	30	uM	F	CELL-LINE	HepG2	341.407
ClC1=C(Nc2ccc(cc2)C(F)(F)F)C(=O)c2c([nH]nc2)C1=O	IC50	=	9.2	uM	F	CELL-LINE	HepG2	341.676
O1[C@H]\2[C@@H](CCC(=C)C(=O)CCC3=C[C@@H](OC3=O)C\C(=C/2)\C)C(=C)C1=O	IC50	=	10	uM	F	CELL-LINE	HepG2	342.391
s1c2c(nc1C(n1nnc(c1)\C=C\C(=O)N[O-])C(C)C)cccc2	GI50	=	1.9	uM	F	CELL-LINE	HepG2	342.403
O(C)c1ccccc1C[NH+]1CCC[NH+](CC1)Cc1ccccc1OC	IC50	=	105	uM	F	CELL-LINE	HepG2	342.483
Clc1ccccc1C=1Oc2c(ccc(c2)C[NH+](CC)CC)C(=O)C=1	IC50	=	10.7	uM	F	CELL-LINE	HepG2	342.846
Brc1ccc(cc1)C=1NC(=O)N=C(C=1)c1ccccc1O	IC50	=	197.91	uM	F	CELL-LINE	HepG2	343.18
O(C)c1c(OC)c2[nH]cc(c2cc1OC)Cc1cc(O)c(OC)cc1	IC50	=	0.07217	uM	F	CELL-LINE	HepG2	343.379
O1c2c(OC1)cc-1c(c2)C(=O)N(c2c-1cccc2)CCc1ccccc1	IC50	=	1.4	uM	F	CELL-LINE	HepG2	343.382
S(C)c1ccc(cc1)COCC#CC(O)c1cc([N+](=O)[O-])ccc1	GI50	=	91	uM	F	CELL-LINE	HepG2	343.403
O=C(Nc1cn(nc1)Cc1ccccc1)CCCCCCC(=O)N[O-]	EC50	=	5.5	uM	F	CELL-LINE	HepG2	343.407
S1c2cc(ccc2-n2c1nc(-c1ccccc1)c2Cn1cccc1)C	IC50	=	3.6	uM	F	CELL-LINE	HepG2	343.454
s1cc(c2c1ncnc2N1CCc2c(C1)cccc2)-c1ccccc1	IC50	=	23.41	uM	F	CELL-LINE	HepG2	343.454
[n+]1(cc2n(c3c(c2cc1)cccc3)CCCc1ccccc1)CCCC	IC50	=	45.5	uM	F	CELL-LINE	HepG2	343.494
[n+]1(cc2n(c3c(c2cc1)cccc3)CCCCCC)Cc1ccccc1	IC50	=	13.9	uM	F	CELL-LINE	HepG2	343.494
Brc1c2c(ncnc2C)n(c1)[C@@H]1O[C@H](CO)[C@@H](O)[C@H]1O	IC50	=	5.55	uM	F	CELL-LINE	HepG2	344.165
Fc1ccc(cc1)C=1n2ncnc2N=C2C=1C(=O)C(=O)c1c2cccc1	IC50	=	7.85	uM	F	CELL-LINE	HepG2	344.305
O(C)c1c(OC)cc(cc1OC)C(=O)\C=C\c1cc(O)c(OC)cc1	IC50	=	10.6	uM	F	CELL-LINE	HepG2	344.363
O(C)c1c(OC)cc(cc1OC)C(=O)\C=C\c1cccc(OC)c1O	IC50	=	13.5	uM	F	CELL-LINE	HepG2	344.363
O(C)c1c2c(C(=O)C(=CC2=O)[C@@H](OC(=O)C)C\C=C(\C)/C)c(O)cc1	IC50	=	0.87	uM	F	CELL-LINE	HepG2	344.363
S(Cc1ccccc1F)c1oc(nn1)-c1cc2OCCOc2cc1	IC50	=	23.98	uM	F	CELL-LINE	HepG2	344.366
S(Cc1ccc(F)cc1)c1oc(nn1)-c1cc2OCCOc2cc1	IC50	=	37.99	uM	F	CELL-LINE	HepG2	344.366
O=C/1Nc2cc(NC(=O)Nc3ccccc3)ccc2\C\1=C\c1[nH]ccc1	IC50	=	4.01	uM	F	CELL-LINE	HepG2	344.374
O=C1N(NC(=O)\C(=C\c2ccccc2)\C#N)C(=Nc2c1cc(cc2)C)C	IC50	=	14	uM	F	CELL-LINE	HepG2	344.374
s1c2c(ncc(c2)-c2cc(OC)cc(OC)c2)c(N)c1C(OC)=O	GI50	=	124.6	uM	F	CELL-LINE	HepG2	344.391
S1CC(OC1COC(=O)NCCCCO)N1C=CC(=NC1=O)N	EC50	=	5	uM	F	CELL-LINE	HepG2	344.392
O1[C@@H]\2[C@H](CC[C@@]3(O[C@@H]3CCC3=C[C@H](OC3=O)C\C(=C/2)\C)C)C(=C)C1=O	IC50	=	10	uM	F	CELL-LINE	HepG2	344.407
O1[C@@H]\2[C@H](CC[C@](O)(\C=C\CC3=C[C@H](OC3=O)C\C(=C/2)\C)C)C(=C)C1=O	IC50	=	10	uM	F	CELL-LINE	HepG2	344.407
S1CC(OC1COC(=O)NCCCC[NH3+])N1C=CC(=NC1=O)N	EC50	=	1	uM	F	CELL-LINE	HepG2	344.416
S(Cc1ccccc1)c1nnc(n1-c1ccccc1)-c1ccncc1	IC50	=	12.91	uM	F	CELL-LINE	HepG2	344.442
O(Cc1ccccc1)c1cc2n(c3c(c2cc1)ccnc3C)CC(C)C	IC50	=	22.3872	uM	F	CELL-LINE	HepG2	344.458
O(Cc1ccccc1)c1cc2n(c3c(c2cc1)ccnc3C)CCCC	IC50	=	17.8	uM	F	CELL-LINE	HepG2	344.458
O(CCCc1ccccc1)c1cc2n(c3c(c2cc1)ccnc3C)CC	IC50	=	11.4	uM	F	CELL-LINE	HepG2	344.458
Clc1ccc(cc1)C(=O)COc1cc2OC(=O)C=Cc2cc1OC	IC50	=	56.3	uM	F	CELL-LINE	HepG2	344.75
Clc1ccccc1\C=C\C(=N\[N-]C(=S)N)\c1ccc(OC)cc1	IC50	=	3.54	uM	F	CELL-LINE	HepG2	344.846
S(CCn1c(ncc1[N+](=O)[O-])C)c1oc(nn1)-c1ccc(cc1)C	IC50	=	2.2	uM	F	CELL-LINE	HepG2	345.383
S(CCn1c(ncc1[N+](=O)[O-])C)c1oc(nn1)-c1ccccc1C	IC50	=	5.1	uM	F	CELL-LINE	HepG2	345.383
S1CC(OC1COC(OCCCC[NH3+])=O)N1C=CC(=NC1=O)N	EC50	=	1	uM	F	CELL-LINE	HepG2	345.4
s1cccc1\C=N\NC(=O)CSc1oc(nn1)-c1ccncc1	IC50	=	14.9	uM	F	CELL-LINE	HepG2	345.407
O(C(=O)c1[n+](Cc2ccccc2)c(c2[nH]c3c(c2c1)cccc3)C)CC	IC50	=	52.4808	uM	F	CELL-LINE	HepG2	345.422
O=C1N(CC[NH+](C)C)C(=O)c2c3c1cc(cc3ccc2)-c1ccccc1	IC50	=	6.04	uM	F	CELL-LINE	HepG2	345.422
O=C1N(CC[NH+](C)C)C(=O)c2c3c1ccc(c3ccc2)-c1ccccc1	IC50	=	37	uM	F	CELL-LINE	HepG2	345.422
O=C(NCC[NH3+])c1ncc2n(c3c(c2c1)cccc3)Cc1ccccc1	IC50	=	104.713	uM	F	CELL-LINE	HepG2	345.426
s1c2nc(ccc2c(N)c1C(=O)N)-c1ccc(cc1)-c1ccccc1	IC50	=	44.7	uM	F	CELL-LINE	HepG2	345.426
S(Cc1ccccc1)c1nnc(n1-c1ccccc1)-c1nccnc1	IC50	=	17.14	uM	F	CELL-LINE	HepG2	345.43
s1cc(nc1NNS(=O)(=O)c1ccc(cc1)C)-c1ccccc1	IC50	=	9.16	uM	F	CELL-LINE	HepG2	345.447
O1[C@]2(CC[C@@H]3[C@@](C2)(CC[C@H]2[C@](CCC[C@]23C)(C(=O)[O-])C)C(=C)C1=O)C	IC50	=	46.54	uM	F	CELL-LINE	HepG2	345.459
O(CC)c1cc2n(c3c(c2cc1)cc[n+](Cc1ccccc1)c3C)CC	IC50	=	14.4544	uM	F	CELL-LINE	HepG2	345.466
[NH3+]CCNc1nccc2c1n(c1c2cccc1)CCCc1ccccc1	IC50	=	13.3	uM	F	CELL-LINE	HepG2	345.47
Clc1cc(OC)c(cc1)C(=O)Nc1ccc(cc1O)C(F)(F)F	IC50	=	3.9	uM	F	CELL-LINE	HepG2	345.704
Clc1cc(OC)c(cc1)C(=O)Nc1cc(ccc1O)C(F)(F)F	IC50	=	25.37	uM	F	CELL-LINE	HepG2	345.704
Clc1cc(C(=O)Nc2ccc(cc2O)C(F)(F)F)c(OC)cc1	IC50	=	4.91	uM	F	CELL-LINE	HepG2	345.704
Clc1cc(C(=O)Nc2cc(ccc2O)C(F)(F)F)c(OC)cc1	IC50	=	15.43	uM	F	CELL-LINE	HepG2	345.704
Clc1cc(Cl)ccc1-c1nc(ncc1)Nc1cc(OC)ccc1	IC50	=	96.9	uM	F	CELL-LINE	HepG2	346.217
Clc1cc(ccc1Cl)-c1nc(ncc1)Nc1cc(OC)ccc1	IC50	=	3.37	uM	F	CELL-LINE	HepG2	346.217
Clc1cc(Cl)ccc1Nc1nc(ccn1)-c1ccc(OC)cc1	IC50	=	0.19	uM	F	CELL-LINE	HepG2	346.217
O=C1c2cc(ccc2N(Cc2ccc(cc2)C#N)C1=O)\C=C\C(OC)=O	IC50	=	0.05	uM	F	CELL-LINE	HepG2	346.342
o1cccc1-c1c2c(ncnc2NC)n(c1)[C@@H]1O[C@H](CO)[C@@H](O)[C@H]1O	IC50	=	0.85	uM	F	CELL-LINE	HepG2	346.343
s1c2c(ncc(c2)-c2cnc(OC)nc2OC)c(N)c1C(OC)=O	GI50	=	23.8	uM	F	CELL-LINE	HepG2	346.367
S(CCn1c(ncc1[N+](=O)[O-])C)c1oc(nn1)-c1ccc(N)cc1	IC50	=	6.7	uM	F	CELL-LINE	HepG2	346.371
S(CCn1c(ncc1[N+](=O)[O-])C)c1oc(nn1)-c1ccccc1N	IC50	=	4.5	uM	F	CELL-LINE	HepG2	346.371
O=C1c2cc(NC(=O)CC[NH+](C)C)ccc2-c2nccc3c2c1ccc3	IC50	=	7.74	uM	F	CELL-LINE	HepG2	346.41
FC(F)(F)c1cc(OCCCCCC)ccc1C(=O)CC[NH+](C)C	EC50	=	10	uM	F	CELL-LINE	HepG2	346.413
FC(F)(F)c1cc(ccc1OCCCCCC)C(=O)CC[NH+](C)C	EC50	=	34	uM	F	CELL-LINE	HepG2	346.413
O1[C@@H]2O[C@@H]3[C@]45[C@H]([C@@]26[C@H]([C@H](O)[C@]14O)C(CCC6)(C)C)CC[C@@H]3C(=C)C5=O	IC50	=	3.9	uM	F	CELL-LINE	HepG2	346.423
Clc1cc(NC(=O)c2ccc(Cl)cc2OC)c(O)cc1Cl	IC50	=	11.52	uM	F	CELL-LINE	HepG2	346.597
Clc1cc(NC(=O)c2cc(Cl)ccc2OC)c(O)cc1Cl	IC50	=	2.98	uM	F	CELL-LINE	HepG2	346.597
Clc1cc(OCCCCCC)cc(Cl)c1C(=O)CC[NH+](C)C	EC50	=	18	uM	F	CELL-LINE	HepG2	347.306
Clc1cc(OCCCCCC)c(Cl)cc1C(=O)CC[NH+](C)C	EC50	=	62	uM	F	CELL-LINE	HepG2	347.306
Clc1c(Cl)c(OCCCCCC)ccc1C(=O)CC[NH+](C)C	EC50	=	31	uM	F	CELL-LINE	HepG2	347.306
o1cccc1-c1c2c(ncnc2OC)n(c1)[C@@H]1O[C@H](CO)[C@@H](O)[C@H]1O	IC50	=	0.3	uM	F	CELL-LINE	HepG2	347.327
O1[C@H](CO)[C@@H](O)[C@@H](O)[C@@H]1n1cc(c2c1ncnc2OC)-c1ccoc1	IC50	=	0.29	uM	F	CELL-LINE	HepG2	347.327
S(CCn1c(ncc1[N+](=O)[O-])C)c1oc(nn1)-c1ccccc1O	IC50	=	19.6	uM	F	CELL-LINE	HepG2	347.355
S(CCn1c(ncc1[N+](=O)[O-])C)c1oc(nn1)-c1cc(ncc1)N	IC50	=	0.9	uM	F	CELL-LINE	HepG2	347.359
S(CCn1c(ncc1[N+](=O)[O-])C)c1oc(nn1)-c1ccc(nc1)N	IC50	=	9.4	uM	F	CELL-LINE	HepG2	347.359
Fc1ccc(cc1)-c1cc(ccc1N)C(=O)\C=C\c1ccc(OC)cc1	IC50	=	3.75	uM	F	CELL-LINE	HepG2	347.389
s1cc(cc1)-c1c2c(ncnc2C)n(c1)[C@@H]1O[C@H](CO)[C@@H](O)[C@H]1O	IC50	=	4.72	uM	F	CELL-LINE	HepG2	347.395
Oc1c2c(ccc1)C(=O)C=C(N1CCC(CC1)c1ccccc1C)C2=O	IC50	=	16.6	uM	F	CELL-LINE	HepG2	347.414
S1c2cc(F)ccc2-n2c1nc(-c1ccccc1)c2Cn1cccc1	IC50	=	2.8	uM	F	CELL-LINE	HepG2	347.417
O1[C@]23[C@@H](CC[C@@](O)(C2)C(=C)C1=O)[C@]1([C@@H](CC3)[C@](CCC1)(C(=O)[O-])C)C	IC50	=	5.68	uM	F	CELL-LINE	HepG2	347.431
O=C1NC[C@@H]2CC[C@H]3[C@@H]4CC[C@H](OC(=O)C)[C@]4(CC[C@@H]3[C@]2(CC1)C)C	IC50	=	47	uM	F	CELL-LINE	HepG2	347.499
O1CC2=C(C=C3N(Cc4c3nc3c(c4)cccc3)C2=O)[C@@](O)(CC)C1=O	IC50	=	0.0063	uM	F	CELL-LINE	HepG2	348.358
S(CCn1c(ncc1[N+](=O)[O-])C)c1oc(nn1)-c1c[nH+]ccc1N	IC50	=	8.4	uM	F	CELL-LINE	HepG2	348.367
Fc1cc(ccc1)-c1cc(ccc1)C(=O)\C=C\c1cc(OC)c(O)cc1	IC50	=	6.83	uM	F	CELL-LINE	HepG2	348.373
O=C1Nc2c(cccc2)C12[NH+](CC1C2C(=O)N(C1=O)c1ccccc1)C	IC50	=	32.9	uM	F	CELL-LINE	HepG2	348.382
s1cccc1-c1c2c(ncnc2N)n(c1)[C@@H]1O[C@H](CO)[C@@H](O)[C@@H]1O	IC50	=	12.23	uM	F	CELL-LINE	HepG2	348.383
O(C)c1c(OC)cc(cc1OC)-c1nccc2c1n(c1c2cccc1)C	IC50	=	86.8	uM	F	CELL-LINE	HepG2	348.402
Oc1c2c(ccc1)C(=O)C=C(N1CCN(CC1)c1ccccc1C)C2=O	IC50	=	10.3	uM	F	CELL-LINE	HepG2	348.402
O(C)c1cc(ccc1O)\C=C\C(=O)\C=C\c1nc2cc(ccc2n1C)C	IC50	=	4.2	uM	F	CELL-LINE	HepG2	348.402
O(C)c1cc(ccc1O)\C=C\C(=O)\C=C\c1nc2c(n1C)cccc2C	IC50	=	1.9	uM	F	CELL-LINE	HepG2	348.402
O(C)c1ccc(cc1O)\C=C\C(=O)\C=C\c1nc2cc(ccc2n1C)C	IC50	=	3.3	uM	F	CELL-LINE	HepG2	348.402
O(C)c1ccc(cc1O)\C=C\C(=O)\C=C\c1nc2c(n1C)cccc2C	IC50	=	14.7	uM	F	CELL-LINE	HepG2	348.402
S=C1OC(=NN1CN(C)c1ccccc1)c1nc2c(cc1)cccc2	IC50	=	28.1	uM	F	CELL-LINE	HepG2	348.43
S=C1OC(=NN1CNc1ccc(cc1)C)c1nc2c(cc1)cccc2	IC50	=	29.8	uM	F	CELL-LINE	HepG2	348.43
O1C[C@@]23[C@H]([C@H](O)[C@@]1(O)[C@]14[C@H]2CC[C@H](C1)C(=C)C4=O)C(CC[C@H]3O)(C)C	IC50	=	4	uM	F	CELL-LINE	HepG2	348.439
O=C1[C@@]23[C@@H](C[C@H](O)[C@H]([C@H]2O)C1=C)[C@]1([C@H](C[C@H]3O)[C@](CCC1)(C=O)C)C	IC50	=	30.82	uM	F	CELL-LINE	HepG2	348.439
O1C2=C3[C@@](CC[C@]4(C2=C([C@@H](O)CC4)C1=O)C)(C)[C@@H](C(C)C)[C@@H](O)[C@H]3O	IC50	=	2.3	uM	F	CELL-LINE	HepG2	348.439
O1C(C)(C)C(=O)C=C1[C@@H](CC[C@H](O)\C(=C\[C@@H]1OC(=O)C=C(C1)C)\C)C	IC50	=	3.62	uM	F	CELL-LINE	HepG2	348.439
O1C(C)(C)C(=O)C=C1[C@@H](CC[C@H](O)\C(=C\[C@H]1OC(=O)C=C(C1)C)\C)C	IC50	=	3.62	uM	F	CELL-LINE	HepG2	348.439
O(C\C=C(\CC\C=C(\C)/C)/C)c1c2nc3c(nc2ccc1)c(O)ccc3	IC50	=	22.3	uM	F	CELL-LINE	HepG2	348.446
O1[C@H](CO)[C@H](O)[C@H](O)[C@@H](O)[C@H]1OCCCCCCCCCCCC	IC50	=	138.3	uM	F	CELL-LINE	HepG2	348.48
O1[C@H](CO)[C@H](O)[C@H](O)[C@@H](O)[C@@H]1OCCCCCCCCCCCC	IC50	=	162.5	uM	F	CELL-LINE	HepG2	348.48
O1[C@H](CO)[C@H](O)[C@H](O)[C@@H](O)C1OCCCCCCCCCCCC	IC50	=	63.4	uM	F	CELL-LINE	HepG2	348.48
O1CC[NH+](CC1)CCC(=O)c1c(cc(OCCCCCC)cc1C)C	EC50	=	31	uM	F	CELL-LINE	HepG2	348.507
Brc1ccc(NC2=CC(=O)c3sc(nc3C2=O)C)cc1	IC50	=	0.00278	uM	F	CELL-LINE	HepG2	349.208
Brc1ccc(cc1)CSc1oc(nn1)-c1nccnc1	IC50	=	13.21	uM	F	CELL-LINE	HepG2	349.212
Brc1cc(ccc1)CSc1oc(nn1)-c1nccnc1	IC50	=	5.79	uM	F	CELL-LINE	HepG2	349.212
Brc1ccccc1CSc1oc(nn1)-c1nccnc1	IC50	=	4.22	uM	F	CELL-LINE	HepG2	349.212
Clc1ccccc1C=1Oc2c(cc(Cl)cc2C[NH+](C)C)C(=O)C=1	IC50	=	1.87	uM	F	CELL-LINE	HepG2	349.237
Clc1cc(Cl)ccc1C=1NC(=S)N=C(C=1)c1ccccc1O	IC50	=	182.85	uM	F	CELL-LINE	HepG2	349.241
Clc1cc(ccc1Cl)/C(=N\[N-]C(=S)N)/C=C/c1ccccc1	IC50	=	5.16	uM	F	CELL-LINE	HepG2	349.265
S(CCn1c(ncc1[N+](=O)[O-])C)c1oc(nn1)-c1ccc(F)cc1	IC50	=	0.6	uM	F	CELL-LINE	HepG2	349.346
S(CCn1c(ncc1[N+](=O)[O-])C)c1oc(nn1)-c1ccccc1F	IC50	=	3.7	uM	F	CELL-LINE	HepG2	349.346
O=C1c2c(cccc2)C(=O)C([O-])=C1CC(COC(=O)c1ccccc1)C	IC50	=	8.43	uM	F	CELL-LINE	HepG2	349.362
Fc1ccc(cc1)Cn1nc(cc1C(=O)NN)-c1c2c([nH]c1)cccc2	IC50	=	17.23	uM	F	CELL-LINE	HepG2	349.369
O=C1c2cc(ccc2N(Cc2cc(cc(c2)C)C)C1=O)\C=C\C(OC)=O	IC50	=	0.15	uM	F	CELL-LINE	HepG2	349.386
O=C(Nc1cc2nc3c(nc2cc1)cccc3)c1c2c(ccc1)cccc2	IC50	=	44.22	uM	F	CELL-LINE	HepG2	349.393
[n+]1(cc2n(c3c(c2cc1)cccc3)Cc1ccccc1)Cc1ccccc1	IC50	=	34.6	uM	F	CELL-LINE	HepG2	349.457
Clc1cc2[nH+]c3c(cc(OC)cc3)c(Nc3ccc(cc3)C)c2cc1	IC50	=	8.8	uM	F	CELL-LINE	HepG2	349.841
Clc1cc2[nH+]c3c(cc(OC)cc3)c(NCc3ccccc3)c2cc1	IC50	=	1.4	uM	F	CELL-LINE	HepG2	349.841
Oc1c2c(C(=O)C=C(N3CCN(CC3)c3ccccc3)C2=O)c(O)cc1	IC50	=	5.4	uM	F	CELL-LINE	HepG2	350.374
O(C)c1cc(ccc1O)\C=C\C(=O)\C=C\c1nc2cc(O)ccc2n1C	IC50	=	3.6	uM	F	CELL-LINE	HepG2	350.374
O(C)c1ccc(cc1O)\C=C\C(=O)\C=C\c1nc2cc(O)ccc2n1C	IC50	=	3.7	uM	F	CELL-LINE	HepG2	350.374
O1c2c(C=CC1(C)C)c(OC)ccc2C(=O)\C=C\c1ccc(OC)cc1	IC50	=	1.51	uM	F	CELL-LINE	HepG2	350.414
O(C)c1cc(cc(OC)c1)\C=C\1/CCC\C(=C/c2ccc(O)cc2)\C/1=O	IC50	=	10.47	uM	F	CELL-LINE	HepG2	350.414
O=C1C=C(Nc2c1c1c(n(cc1)Cc1ccccc1)cc2)c1ccccc1	IC50	=	0.7	uM	F	CELL-LINE	HepG2	350.421
O(C)c1cc2c3c(C[C@@H]4[NH+](CCC4)C3)c3c(cc(OC)cc3)c2cc1O	GI50	=	0.013	uM	F	CELL-LINE	HepG2	350.438
O=C1[C@@]23[C@@H](C[C@H](O)[C@H]([C@H]2O)C1=C)[C@]1([C@H](C[C@H]3O)[C@](CCC1)(CO)C)C	IC50	=	42.08	uM	F	CELL-LINE	HepG2	350.455
O1[C@H]2C3=C(C1)[C@@H](O)CC[C@]3(CC[C@@]1(C)[C@@]2(O)C(=O)[C@H](O)[C@@H]1C(C)C)C	IC50	=	16.9	uM	F	CELL-LINE	HepG2	350.455
O(CC)c1c(cc(cc1C=O)CC=C)-c1cc(CC=C)c(OCC)cc1	IC50	=	28.5	uM	F	CELL-LINE	HepG2	350.458
Clc1c2c3c(ncnc3N)n(c2ccc1)[C@@H]1O[C@H](CO)[C@@H](O)[C@H]1O	IC50	=	21	uM	F	CELL-LINE	HepG2	350.762
Clc1cc2[nH+]c3c(cc(OC)cc3)c(Nc3ccc(N)cc3)c2cc1	IC50	=	11	uM	F	CELL-LINE	HepG2	350.829
ClCc1nc(sc1)NNC(=O)c1nc(sc1)-c1ccccc1	IC50	=	11.23	uM	F	CELL-LINE	HepG2	350.854
Clc1ccc(NC(=S)NCCc2cc(OC)c(OC)cc2)cc1	IC50	=	60.79	uM	F	CELL-LINE	HepG2	350.87
Clc1cc(Cl)ccc1C(=O)\C=C\c1oc(cc1)\C=C\C(=O)N[O-]	IC50	=	13.52	uM	F	CELL-LINE	HepG2	351.165
Clc1ccc(Cl)cc1C(=O)\C=C\c1oc(cc1)\C=C\C(=O)N[O-]	IC50	=	48.27	uM	F	CELL-LINE	HepG2	351.165
Fc1cc(ccc1O)\C=C\C(=O)c1cc(-c2ccc(F)cc2)c(N)cc1	IC50	=	11.7	uM	F	CELL-LINE	HepG2	351.352
O(C)c1c(OC)cc(cc1OC)\C=N/C1=CC(=O)C(=O)c2c1cccc2	IC50	=	5.91	uM	F	CELL-LINE	HepG2	351.358
O(C)c1ccc(cc1)CN1c2c(C(=O)C1=O)c(ccc2)\C=C\C(OC)=O	IC50	=	5.49	uM	F	CELL-LINE	HepG2	351.358
O(CCN1c2c(cc(cc2)\C=C\C(OC)=O)C(=O)C1=O)c1ccccc1	IC50	=	0.21	uM	F	CELL-LINE	HepG2	351.358
O(C)c1ccc(cc1)CN1c2c(cc(cc2)\C=C\C(OC)=O)C(=O)C1=O	IC50	=	0.03	uM	F	CELL-LINE	HepG2	351.358
s1cc(c2c1cccc2)C=1OC2=C(C([O-])=C(C)C(=O)C2(C)C)C(=O)C=1	GI50	=	0.57	uM	F	CELL-LINE	HepG2	351.402
s1c2c(ncc(c2)C#Cc2ccc(N(C)C)cc2)c(N)c1C(OC)=O	GI50	=	67.6	uM	F	CELL-LINE	HepG2	351.43
s1c2CCCCc2c2c1N=C(N(C(=O)N)C2=O)\C=C\c1ccccc1	IC50	=	18.5	uM	F	CELL-LINE	HepG2	351.43
s1cccc1-c1cc2c3c(cccc3c1)C(=O)N(CC[NH+](C)C)C2=O	IC50	=	3.7	uM	F	CELL-LINE	HepG2	351.45
Clc1cc2[nH+]c3c(cc(OC)cc3)c(Nc3cc(O)ccc3)c2cc1	IC50	=	9.6	uM	F	CELL-LINE	HepG2	351.813
Clc1cc2[nH+]c3c(cc(OC)cc3)c(Nc3ccccc3O)c2cc1	IC50	=	11.4	uM	F	CELL-LINE	HepG2	351.813
Clc1cc2[nH+]c3c(cc(OC)cc3)c(Nc3cccnc3N)c2cc1	IC50	=	10.6	uM	F	CELL-LINE	HepG2	351.817
Clc1cc2[nH+]c3c(cc(OC)cc3)c(Nc3nc(N)ccc3)c2cc1	IC50	=	32.7	uM	F	CELL-LINE	HepG2	351.817
O1c2c(C(=O)C(O)=C1c1ccc(O)cc1)c(O)cc1OC(C=Cc12)(C)C	IC50	=	43.3	uM	F	CELL-LINE	HepG2	352.342
O(C)c1cc(ccc1O)\C=C\1/CC\C(=C/c2cc(OC)c(O)cc2)\C/1=O	IC50	=	44	uM	F	CELL-LINE	HepG2	352.386
O1C[C@H]2[C@]34Oc5c(C(=O)C3=C[C@H](C2)C(=O)C14C\C=C(\C)/C)c(O)ccc5	IC50	=	2.65	uM	F	CELL-LINE	HepG2	352.386
S=C1OC(=NN1CNc1ccc(F)cc1)c1nc2c(cc1)cccc2	IC50	=	17.3	uM	F	CELL-LINE	HepG2	352.393
S=C1OC(=NN1CNc1cc(F)ccc1)c1nc2c(cc1)cccc2	IC50	=	11.3	uM	F	CELL-LINE	HepG2	352.393
S=C1OC(=NN1CNc1ccccc1F)c1nc2c(cc1)cccc2	IC50	=	1.2	uM	F	CELL-LINE	HepG2	352.393
Fc1ccc(cc1)\C=C\1/CCC\C(=C/c2cc(OC)cc(OC)c2)\C/1=O	IC50	=	12.09	uM	F	CELL-LINE	HepG2	352.405
Fc1ccccc1\C=C\1/CCC\C(=C/c2cc(OC)cc(OC)c2)\C/1=O	IC50	=	7.53	uM	F	CELL-LINE	HepG2	352.405
O(C)c1cc2c3c(CC[NH+](C3)CC)c3c(cc(OC)cc3)c2cc1OC	GI50	=	0.66	uM	F	CELL-LINE	HepG2	352.454
O(C)c1cc2c3CC[NH+](Cc3c3cc(OC)ccc3c2cc1OC)CC	GI50	=	4.01	uM	F	CELL-LINE	HepG2	352.454
Brc1cc(NC2=C(Cl)C(=O)c3[nH]ncc3C2=O)ccc1	IC50	=	6.1	uM	F	CELL-LINE	HepG2	352.575
O[C@H]1CC[C@]2([C@@H](CC[NH+](C2)CCCCCCCCCCCC)[C@@H]1C)C	IC50	=	0.01	uM	F	CELL-LINE	HepG2	352.627
Clc1ccccc1N1CCN(CC1)C1=CC(=O)c2c(cccc2)C1=O	IC50	=	11.1	uM	F	CELL-LINE	HepG2	352.821
O1C2=C(C([O-])=C(C)C(=O)C2(C)C)C(=O)C=C1c1cc2OCCOc2cc1	GI50	=	23.73	uM	F	CELL-LINE	HepG2	353.35
O(C)c1c(OC)cc(N2C(=CC=CC2=O)c2cc(O)ccc2)cc1OC	IC50	=	0.034	uM	F	CELL-LINE	HepG2	353.374
O(C)c1ccc(cc1)CN1c2c(cc(cc2)\C=C\C(OC)=O)C(O)C1=O	IC50	=	0.38	uM	F	CELL-LINE	HepG2	353.374
Oc1ccccc1C1N(N=C(C1)C)C(=O)CCc1ccc([N+](=O)[O-])cc1	IC50	=	107.28	uM	F	CELL-LINE	HepG2	353.378
S1S[C@@]23N(c4cc([N+](=O)[O-])ccc4C2)C(=O)[C@@]1(N(C)C3=O)CO	IC50	=	2.3	uM	F	CELL-LINE	HepG2	353.379
O1c2c(cccc2C[NH+](CC)CC)C(=O)C=C1c1ccc([N+](=O)[O-])cc1	IC50	=	28.8	uM	F	CELL-LINE	HepG2	353.398
s1c2CCCCc2c2c1N=C(NC2=O)\C=C\c1ccccc1[N+](=O)[O-]	IC50	=	11.88	uM	F	CELL-LINE	HepG2	353.402
S(CC(=O)N\N=C\c1ccc(cc1)C)c1oc(nn1)-c1ccncc1	IC50	=	10.02	uM	F	CELL-LINE	HepG2	353.406
O=C1c2c(cccc2NC(=O)C[NH2+]CCCC[NH3+])C(=O)c2c1cccc2	IC50	=	24.25	uM	F	CELL-LINE	HepG2	353.422
Fc1ccc(cc1)\C=N\Nc1nc(NCC[NH+](C)C)c2c(n1)cccc2	IC50	=	1.82	uM	F	CELL-LINE	HepG2	353.425
o1c(nnc1CCCc1c2c([nH]c1)cccc2)-c1c2c(ccc1)cccc2	IC50	=	101	uM	F	CELL-LINE	HepG2	353.425
Clc1cc2[nH+]c3c(cc(OC)cc3)c(Nc3ccccc3F)c2cc1	IC50	=	46.1	uM	F	CELL-LINE	HepG2	353.804
O1C[C@@]12[C@@H]1Oc3cc(O)c4c(Oc5c(cccc5OC)C4=O)c3[C@@H]1OC2	IC50	=	13.11	uM	F	CELL-LINE	HepG2	354.314
O1c2cc(ccc2OC1=O)C[C@H]([C@H](Cc1cc2OC(Oc2cc1)=O)C)C	IC50	=	164.5	uM	F	CELL-LINE	HepG2	354.358
O=C1NC(=CC=C1C(=O)NCC[NH+](C)C)\C=C/1\c2cccnc2NC\1=O	IC50	=	27.3	uM	F	CELL-LINE	HepG2	354.39
O=C1N(CC[NH+](C)C)C(=O)c2c3c1cc1nnn(c1c3ccc2)CCO	IC50	=	1.07	uM	F	CELL-LINE	HepG2	354.39
s1c(C(=O)NN2C(=Nc3c(cc(cc3)C)C2=O)C)c(N)c(C#N)c1N	IC50	=	15	uM	F	CELL-LINE	HepG2	354.394
O1c2c(cc(cc2)C(C)C)C(=O)C=C1c1cc(OC)c(OC)c(OC)c1	IC50	=	3.6	uM	F	CELL-LINE	HepG2	354.402
S=C1NC(=CC(=N1)c1ccccc1O)c1cc(OC)c(OCC)cc1	IC50	=	74.18	uM	F	CELL-LINE	HepG2	354.43
O=C/1Nc2c(nccc2)\C\1=C\c1[nH]c(C)c(C(=O)NCC[NH+](C)C)c1C	IC50	=	20.2	uM	F	CELL-LINE	HepG2	354.434
O=C/1Nc2ncccc2\C\1=C\c1[nH]c(C)c(C(=O)NCC[NH+](C)C)c1C	IC50	=	18.3	uM	F	CELL-LINE	HepG2	354.434
O1[C@@H]2O[C@@]3(OO[C@]24[C@@H](CC[C@H]([C@@H]4CC3)C)[C@@H](C)[C@H]1OC(=O)CCC)C	IC50	=	100	uM	F	CELL-LINE	HepG2	354.443
OC[C@H](Nc1nc(NCc2ccccc2)c2ncn(c2n1)C(C)C)CC	GI50	=	25.9	uM	F	CELL-LINE	HepG2	354.458
O(CC)C1=CC(=O)C=2[C@@H]3[C@@H]4[C@@](CC[C@H](C)[C@]4(CC=2C1=O)C)(C)C(CC3)=C	IC50	=	9.4	uM	F	CELL-LINE	HepG2	354.49
O(CCCCCC)c1ccc(cc1-c1ccccc1)C(=O)CC[NH+](C)C	EC50	=	16	uM	F	CELL-LINE	HepG2	354.514
O(CCCCCC)c1ccc(cc1)C(=O)C(C[NH+](C)C)c1ccccc1	EC50	=	27	uM	F	CELL-LINE	HepG2	354.514
S(=O)(=O)(CCCCCC)c1cc(C)c(C(=O)CC[NH+](C)C)c(c1)C	EC50	=	29	uM	F	CELL-LINE	HepG2	354.535
[NH+](CC[NH2+]Cc1ncc2n(c3c(c2c1)cccc3)CCCC)(CC)CC	IC50	=	10.1	uM	F	CELL-LINE	HepG2	354.542
O=C/1C[C@]2([C@H]3[C@]4([C@@]5(C(CC3)C(=C)[C@@H]([NH2+]C)CC5)C4)CC[C@]2(C)\C\1=C/C)C	IC50	=	0.78	uM	F	CELL-LINE	HepG2	354.558
Clc1ccccc1C=1Oc2c(ccc(c2)C[NH+]2CCCCC2)C(=O)C=1	IC50	=	3.64	uM	F	CELL-LINE	HepG2	354.857
Clc1ccc(cc1)C=1Oc2c(cc(cc2)C[NH+]2CCCCC2)C(=O)C=1	IC50	=	14	uM	F	CELL-LINE	HepG2	354.857
Clc1cc(OCCCCCC)ccc1C(=O)CC[NH+]1CCOCC1	EC50	=	39	uM	F	CELL-LINE	HepG2	354.898
o1c2c(nc1C(n1nnc(c1)\C=C\C(=O)N[O-])CCC(=O)N)cccc2	GI50	=	14	uM	F	CELL-LINE	HepG2	355.334
Oc1ccc(cc1)-c1nc2c(c3c1-c1c(cc(O)cc1)C3=O)cc(O)cc2	GI50	=	5.51	uM	F	CELL-LINE	HepG2	355.349
Fc1cc(N2C(=CC=CC2=O)c2cc(OC)c(OC)c(OC)c2)ccc1	IC50	=	0.073	uM	F	CELL-LINE	HepG2	355.365
Fc1cc(ccc1)C=1N(C(=O)C=CC=1)c1cc(OC)c(OC)c(OC)c1	IC50	=	0.159	uM	F	CELL-LINE	HepG2	355.365
S(CC(=O)N\N=C\c1ccccc1O)c1oc(nn1)-c1ccncc1	IC50	=	3.51	uM	F	CELL-LINE	HepG2	355.378
S(CC(=O)N\N=C\c1ccc(O)cc1)c1oc(nn1)-c1ccncc1	IC50	=	5.51	uM	F	CELL-LINE	HepG2	355.378
O1[C@@H]2O[C@@]3(OO[C@]24[C@@H](CC[C@H]([C@@H]4CC3)C)[C@@H](C)[C@H]1OC(=O)N(C)C)C	IC50	=	70	uM	F	CELL-LINE	HepG2	355.431
O=C/1Nc2c(c[nH+]cc2)\C\1=C\c1[nH]c(C)c(C(=O)NCC[NH+](C)C)c1C	IC50	=	8.6	uM	F	CELL-LINE	HepG2	355.442
Clc1ccc(cc1)CN1c2c(cc(cc2)\C=C\C(OC)=O)C(=O)C1=O	IC50	=	0.04	uM	F	CELL-LINE	HepG2	355.777
Brc1n2C=C(N=Cc2nc1C1=Cc2c(OC1=O)cccc2)C	IC50	=	900	uM	F	CELL-LINE	HepG2	356.179
Brc1ccc(cc1)-c1nc(ncc1)Nc1cc(OC)ccc1	IC50	=	148.05	uM	F	CELL-LINE	HepG2	356.223
[se]1cc(nc1N\N=C\c1ccc(OC)cc1)-c1ccccc1	IC50	=	50.47	uM	F	CELL-LINE	HepG2	356.29
O(C)c1ccc(cc1)C=1n2ncnc2N=C2C=1C(=O)C(=O)c1c2cccc1	IC50	=	1.71	uM	F	CELL-LINE	HepG2	356.341
O1c2cc(CC(C(C(=O)c3cc4OCOc4cc3)C)C)c(O)cc2OC1	IC50	=	62	uM	F	CELL-LINE	HepG2	356.374
o1ncc(c1-c1cc(OC)c(OC)c(OC)c1)-c1cc(N)c(OC)cc1	IC50	=	6.5e-05	uM	F	CELL-LINE	HepG2	356.378
S(=O)(=O)(c1[n+](onc1OCC[NH+]1CC[NH2+]CC1)[O-])c1ccccc1	IC50	=	17.58	uM	F	CELL-LINE	HepG2	356.403
o1c(ccc1\C=C\C(=O)N[O-])C[NH+](Cc1ccccc1)CCCCCC	EC50	=	21.8	uM	F	CELL-LINE	HepG2	356.466
O1C2=C(c3n[nH]cc3C1(C)C)C(=O)C=C(C(CCCCCC)(C)C)C2=O	IC50	=	30	uM	F	CELL-LINE	HepG2	356.466
O(C)c1ccc(cc1)\C=C\c1nccc2c1n(c1c2cccc1)CCCC	IC50	=	66	uM	F	CELL-LINE	HepG2	356.469
S=C(N)[N-]\N=C(\C=C\c1ccc(cc1)-c1ccccc1)/c1ccccc1	IC50	=	2.57	uM	F	CELL-LINE	HepG2	356.473
S(=O)(=O)(C)c1cc(OCCCCCC)ccc1C(=O)CC[NH+](C)C	EC50	=	45	uM	F	CELL-LINE	HepG2	356.507
Brc1cc(O)c(NC(=O)c2ccc(Cl)cc2OC)cc1	IC50	=	46.62	uM	F	CELL-LINE	HepG2	356.603
Brc1cc(NC(=O)c2ccc(Cl)cc2OC)c(O)cc1	IC50	=	5.63	uM	F	CELL-LINE	HepG2	356.603
Brc1cc(O)c(NC(=O)c2cc(Cl)ccc2OC)cc1	IC50	=	7.98	uM	F	CELL-LINE	HepG2	356.603
Brc1cc(NC(=O)c2cc(Cl)ccc2OC)c(O)cc1	IC50	=	4.09	uM	F	CELL-LINE	HepG2	356.603
Clc1ccccc1C=1Oc2c(ccc(c2)C[NH+]2CC[NH2+]CC2)C(=O)C=1	IC50	=	2.58	uM	F	CELL-LINE	HepG2	356.853
Clc1ccc(cc1)C=1Oc2c(cc(cc2)C[NH+]2CC[NH2+]CC2)C(=O)C=1	IC50	=	2.69	uM	F	CELL-LINE	HepG2	356.853
Brc1cc(OCCCCCC)ccc1C(=O)CC[NH+](C)C	EC50	=	54	uM	F	CELL-LINE	HepG2	357.312
Brc1cc(ccc1OCCCCCC)C(=O)CC[NH+](C)C	EC50	=	33	uM	F	CELL-LINE	HepG2	357.312
[Se](\C(=N/C(=O)c1sccc1)\NC(=O)c1sccc1)C	GI50	=	0.63	uM	F	CELL-LINE	HepG2	357.319
o1ncc(c1-c1cc(OC)c(OC)c(OC)c1)-c1cc(O)c(OC)cc1	IC50	=	0.00143	uM	F	CELL-LINE	HepG2	357.362
o1ncc(c1-c1cc(O)c(OC)cc1)-c1cc(OC)c(OC)c(OC)c1	IC50	=	0.0339	uM	F	CELL-LINE	HepG2	357.362
O=C(n1c2c(c3c1cccc3)ccnc2\C=C\c1ccc([N+](=O)[O-])cc1)C	IC50	=	197	uM	F	CELL-LINE	HepG2	357.369
S(CC(=O)N\N=C\c1ccccc1F)c1oc(nn1)-c1ccncc1	IC50	=	16.01	uM	F	CELL-LINE	HepG2	357.369
S(CC(=O)N\N=C\c1cc(F)ccc1)c1oc(nn1)-c1ccncc1	IC50	=	19.45	uM	F	CELL-LINE	HepG2	357.369
S(CC(=O)N\N=C\c1ccc(F)cc1)c1oc(nn1)-c1ccncc1	IC50	=	12.3	uM	F	CELL-LINE	HepG2	357.369
O(C)c1c(OC)c2n(cc(c2cc1OC)Cc1cc(O)c(OC)cc1)C	IC50	=	0.04549	uM	F	CELL-LINE	HepG2	357.406
O(C)c1c2c([nH+]c(cc2Nc2ccccc2)-c2ccccc2)cc(OC)c1	IC50	=	36.39	uM	F	CELL-LINE	HepG2	357.433
s1c2cc(NC(=O)c3ccccc3)ccc2nc1SCC(=O)NC	IC50	=	26.5	uM	F	CELL-LINE	HepG2	357.458
S(C\C=C(\CC\C=C(\CC\C=C(\C)/C)/C)/C)c1ccccc1C(=O)[O-]	IC50	=	107.51	uM	F	CELL-LINE	HepG2	357.538
Clc1cccc(Cl)c1-c1oc(nn1)CCc1c2c([nH]c1)cccc2	IC50	=	102	uM	F	CELL-LINE	HepG2	358.228
O1c2c(c(O)c(OC)c(OC)c2OC)C(=O)C=C1c1ccc(OC)cc1	IC50	=	40	uM	F	CELL-LINE	HepG2	358.346
O1c2c(cc(OC)c(O)c2OC)C(=O)C=C1c1cc(OC)c(OC)cc1	IC50	=	20	uM	F	CELL-LINE	HepG2	358.346
O(C)c1c(OC)cc(cc1OC)C1CC(=O)c2c1cc(OC)c(OC)c2	IC50	=	111.7	uM	F	CELL-LINE	HepG2	358.39
Oc1c2c(C(=O)C=C([C@@H](OC(=O)C(C)C)C\C=C(\C)/C)C2=O)c(O)cc1	IC50	=	0.42	uM	F	CELL-LINE	HepG2	358.39
Oc1c2c(C(=O)C=C([C@H](OC(=O)C(C)C)C\C=C(\C)/C)C2=O)c(O)cc1	IC50	=	0.22	uM	F	CELL-LINE	HepG2	358.39
O1c2cc(C[C@H]([C@H]([C@H](O)c3cc4OCOc4cc3)C)C)c(O)cc2OC1	IC50	=	61	uM	F	CELL-LINE	HepG2	358.39
O(C)c1c(cccc1OC)\C=C\C(=O)c1cc(OC)c(OC)c(OC)c1	IC50	=	11.5	uM	F	CELL-LINE	HepG2	358.39
O(C)c1c(OC)cc(cc1OC)C(=O)\C=C\c1cc(OC)c(OC)cc1	IC50	=	20.3	uM	F	CELL-LINE	HepG2	358.39
O(C)c1c(OC)cc(cc1OC)C(=O)\C(=C\c1cc(O)c(OC)cc1)\C	IC50	=	0.00021	uM	F	CELL-LINE	HepG2	358.39
o1c(ccc1\C=C\C(=O)N[O-])C[NH+](CCc1cc2OCOc2cc1)CC	EC50	=	81.66	uM	F	CELL-LINE	HepG2	358.394
O=C1N(NC(=O)\C(=C\c2ccc(cc2)C)\C#N)C(=Nc2c1cc(cc2)C)C	IC50	=	12	uM	F	CELL-LINE	HepG2	358.401
Fc1ccc(cc1)C(c1c2c(ccc1O)cccc2)c1ccc(OC)cc1	IC50	=	14	uM	F	CELL-LINE	HepG2	358.412
O=C1c2cc(NC(=O)C[NH+]3CCCC3)ccc2-c2nccc3c2c1ccc3	IC50	=	8.14	uM	F	CELL-LINE	HepG2	358.421
O(C)c1cc(ccc1OC)C[C@H]([C@H](Cc1cc(OC)c(OC)cc1)C)C	IC50	=	44.5	uM	F	CELL-LINE	HepG2	358.478
O(C(C)C)c1cc2n(c3c(c2cc1)ccnc3C)CCCc1ccccc1	IC50	=	14.4544	uM	F	CELL-LINE	HepG2	358.485
O1[C@@]23[C@H]4[C@H](CC[C@@]2([C@H](CC3)C(=C1)C=C)C)[C@]1(CC[C@H](O)C[C@@]1(O)CC4)C	IC50	=	68.7	uM	F	CELL-LINE	HepG2	358.522
Clc1cc(c2N=C(OC(=O)c2c1)C1ON=C(C1)c1ccc(F)cc1)C	IC50	=	53.4	uM	F	CELL-LINE	HepG2	358.756
Clc1cc(Nc2ncnc3c2cc(NCCCSC)cc3)ccc1	IC50	=	8.92	uM	F	CELL-LINE	HepG2	358.897
Brc1ccc(cc1)C=1NC(=S)N=C(C=1)c1ccccc1O	IC50	=	261.68	uM	F	CELL-LINE	HepG2	359.247
Brc1ccc(cc1)/C(=N\[N-]C(=S)N)/C=C/c1ccccc1	IC50	=	6.35	uM	F	CELL-LINE	HepG2	359.271
Brc1ccccc1\C=C\C(=N\[N-]C(=S)N)\c1ccccc1	IC50	=	17	uM	F	CELL-LINE	HepG2	359.271
Brc1ccc(cc1)\C=C\C(=N\[N-]C(=S)N)\c1ccccc1	IC50	=	18	uM	F	CELL-LINE	HepG2	359.271
Clc1c(Cl)c(OCCCCCC)ccc1C(=O)CC[NH+]1CC1C	EC50	=	39	uM	F	CELL-LINE	HepG2	359.317
Clc1cc(OCCCCCC)cc(Cl)c1C(=O)CC[NH+]1CC1C	EC50	=	43	uM	F	CELL-LINE	HepG2	359.317
Clc1cc(OCCCCCC)c(Cl)cc1C(=O)CC[NH+]1CC1C	EC50	=	57	uM	F	CELL-LINE	HepG2	359.317
O1C2=C(C([O-])=C(C)C(=O)C2(C)C)C(=O)C=C1c1c2c(cccc2)c(cc1)C	GI50	=	1.33	uM	F	CELL-LINE	HepG2	359.401
O1c2c(C=CC1(C)C)c(OC)ccc2C(=O)\C=C\c1c2c([nH]cc2)ccc1	IC50	=	8.38	uM	F	CELL-LINE	HepG2	359.425
O1c2c(C=CC1(C)C)c(OC)ccc2C(=O)\C=C\c1cc2c([nH]cc2)cc1	IC50	=	1.06	uM	F	CELL-LINE	HepG2	359.425
O1c2c(C=CC1(C)C)c(OC)ccc2C(=O)\C=C\c1cc2[nH]ccc2cc1	IC50	=	4.95	uM	F	CELL-LINE	HepG2	359.425
O1c2c(C=CC1(C)C)c(OC)ccc2C(=O)\C=C\c1c2[nH]ccc2ccc1	IC50	=	7.62	uM	F	CELL-LINE	HepG2	359.425
O=C1N(CC[NH+](C)C)C(=O)c2c3c1cc(cc3ccc2)-c1ccc(cc1)C	IC50	=	36.82	uM	F	CELL-LINE	HepG2	359.449
O=C(NCC[NH3+])c1nc(c2n(c3c(c2c1)cccc3)Cc1ccccc1)C	IC50	=	34.6737	uM	F	CELL-LINE	HepG2	359.453
ClC1=C(Sc2cc(Cl)c(Cl)cc2)C(=O)c2c([nH]nc2)C1=O	IC50	=	88.7	uM	F	CELL-LINE	HepG2	359.62
Clc1cc(c2OC(=CC(=O)c2c1)c1ccc([N+](=O)[O-])cc1)C[NH+](C)C	IC50	=	6.19	uM	F	CELL-LINE	HepG2	359.789
Clc1ccc(cc1)C[NH2+]C1[C@H]2[C@@H]1CN(C2)c1ncc(cn1)C(=O)N[O-]	GI50	=	0.47	uM	F	CELL-LINE	HepG2	359.817
O1c2c(C(=O)c3c1c(O)c(O)cc3)c(O)cc(OC)c2CCC(O)(C)C	IC50	=	4.8	uM	F	CELL-LINE	HepG2	360.362
O1[C@H](CO)[C@@H](O)[C@@H](O)[C@@H]1n1cc(c2c1ncnc2N(C)C)-c1ccoc1	IC50	=	12.5	uM	F	CELL-LINE	HepG2	360.37
O(Cc1ccccc1)c1ccc(cc1[N+](=O)[O-])-c1nc2n(C=C(N=C2)C)c1	IC50	=	129.8	uM	F	CELL-LINE	HepG2	360.373
Oc1cc(ccc1)\C=C(\C(=O)NN1C(=Nc2c(cc(cc2)C)C1=O)C)/C#N	IC50	=	14	uM	F	CELL-LINE	HepG2	360.373
Oc1ccc(cc1)\C=C(\C(=O)NN1C(=Nc2c(cc(cc2)C)C1=O)C)/C#N	IC50	=	13	uM	F	CELL-LINE	HepG2	360.373
O1c2c(C=C(C(=O)NN3C(=Nc4c(cc(cc4)C)C3=O)C)C1=N)cccc2	IC50	=	23	uM	F	CELL-LINE	HepG2	360.373
O=C1N(NC(=O)\C(=N\Nc2ccccc2)\C#N)C(=Nc2c1cc(cc2)C)C	IC50	=	12	uM	F	CELL-LINE	HepG2	360.377
O1c2c3c4c(CC[n+]5c4c(c4c(c5)c(OC)c(OC)cc4)cc3)cc2OC1	IC50	=	0.71	uM	F	CELL-LINE	HepG2	360.389
O1[C@@H]2[C@]3([C@@H]4[C@@H](OC[C@@]4(CC2)C)OC3)[C@H]2[C@]3(C[C@@H](C[C@H]2O)C(=C)C3=O)C1=O	IC50	=	1.77	uM	F	CELL-LINE	HepG2	360.406
O1C[C@@]2([C@@H]3[C@H]4OC[C@@]3(CC[C@H]2O4)C)[C@H]2[C@]3(C[C@@H](C[C@H]2O)C(=C)C3=O)C1=O	IC50	=	0.68	uM	F	CELL-LINE	HepG2	360.406
O1[C@@H]\2[C@H](CC[C@](OO)(\C=C\CC3=C[C@H](OC3=O)C\C(=C/2)\C)C)C(=C)C1=O	IC50	=	0.9	uM	F	CELL-LINE	HepG2	360.406
O1[C@@H]\2[C@H](CCC(=C)[C@H](OO)CCC3=C[C@H](OC3=O)C\C(=C/2)\C)C(=C)C1=O	IC50	=	3.11	uM	F	CELL-LINE	HepG2	360.406
O(C)c1c(OC)cc(cc1OC)\C=C\c1nccc2c1[nH]c1c2cccc1	IC50	=	32.2	uM	F	CELL-LINE	HepG2	360.413
O=C1c2cc(NC(=O)CCC[NH+](C)C)ccc2-c2nccc3c2c1ccc3	IC50	=	29.83	uM	F	CELL-LINE	HepG2	360.437
Oc1cc(nc2c1c1c(n(cc1)CC[NH+](CC)CC)cc2)-c1ccccc1	IC50	=	7	uM	F	CELL-LINE	HepG2	360.481
O1[C@@]2(CC[C@H]3[C@](C2)(CC[C@@H]2[C@@](CCC[C@@]23C)(C(OC)=O)C)C(=C)C1=O)C	IC50	=	35.24	uM	F	CELL-LINE	HepG2	360.494
Brc1ccc(cc1)-c1nc(ncc1)Nc1ccc(Cl)cc1	IC50	=	47.48	uM	F	CELL-LINE	HepG2	360.642
[se]1cc(nc1N\N=C\c1ccc(Cl)cc1)-c1ccccc1	IC50	=	42.5	uM	F	CELL-LINE	HepG2	360.709
Clc1ccc(cc1)C=1n2ncnc2N=C2C=1C(=O)C(=O)c1c2cccc1	IC50	=	24.93	uM	F	CELL-LINE	HepG2	360.76
Clc1ccc(cc1)CSc1oc(nn1)-c1cc2OCCOc2cc1	IC50	=	28.83	uM	F	CELL-LINE	HepG2	360.821
Clc1ccccc1CSc1oc(nn1)-c1cc2OCCOc2cc1	IC50	=	22.64	uM	F	CELL-LINE	HepG2	360.821
Clc1cc(ccc1)CSc1oc(nn1)-c1cc2OCCOc2cc1	IC50	=	33.36	uM	F	CELL-LINE	HepG2	360.821
Clc1cc(S(=O)(=O)CCCCCC)ccc1C(=O)CC[NH+](C)C	EC50	=	66	uM	F	CELL-LINE	HepG2	360.926
Clc1cc(Cl)ccc1-c1nc(ncc1)Nc1ccc([N+](=O)[O-])cc1	IC50	=	99.33	uM	F	CELL-LINE	HepG2	361.188
Clc1cc(ccc1Cl)-c1nc(ncc1)Nc1ccc([N+](=O)[O-])cc1	IC50	=	0.5	uM	F	CELL-LINE	HepG2	361.188
S(CCn1c(ncc1[N+](=O)[O-])C)c1oc(nn1)-c1ccc(OC)cc1	IC50	=	5.8	uM	F	CELL-LINE	HepG2	361.382
S(CCn1c(ncc1[N+](=O)[O-])C)c1oc(nn1)-c1ccccc1OC	IC50	=	10	uM	F	CELL-LINE	HepG2	361.382
S(CCn1c(ncc1[N+](=O)[O-])C)c1oc(nn1)-c1ccc(cc1O)C	IC50	=	16.6	uM	F	CELL-LINE	HepG2	361.382
S(CCn1c(ncc1[N+](=O)[O-])C)c1oc(nn1)-c1cccc(C)c1O	IC50	=	8.7	uM	F	CELL-LINE	HepG2	361.382
S=C(Nc1ccc([N+](=O)[O-])cc1)NCCc1cc(OC)c(OC)cc1	IC50	=	42.42	uM	F	CELL-LINE	HepG2	361.422
O1[C@@H](C)[C@@H]([NH3+])CC[C@@H]1OCC#Cc1c2c([nH]c1-c1ccccc1)cccc2	IC50	=	11.4	uM	F	CELL-LINE	HepG2	361.465
O(CCCCCC)c1cc(C)c(C(=O)CC[NH+]2CC(=O)NCC2)c(c1)C	EC50	=	39	uM	F	CELL-LINE	HepG2	361.506
Clc1cc(OC)c(cc1)C(=S)Nc1ccc(cc1O)C(F)(F)F	IC50	=	3.14	uM	F	CELL-LINE	HepG2	361.771
Clc1cc(OC)c(cc1)C(=S)Nc1cc(ccc1O)C(F)(F)F	IC50	=	5.74	uM	F	CELL-LINE	HepG2	361.771
Clc1cc(C(=S)Nc2ccc(cc2O)C(F)(F)F)c(OC)cc1	IC50	=	3.69	uM	F	CELL-LINE	HepG2	361.771
Clc1cc(C(=S)Nc2cc(ccc2O)C(F)(F)F)c(OC)cc1	IC50	=	5.86	uM	F	CELL-LINE	HepG2	361.771
Clc1cc(Nc2ncnc3c2cc(NCc2cccnc2)cc3)ccc1	IC50	=	4.14	uM	F	CELL-LINE	HepG2	361.836
S(Cc1c(F)cccc1F)c1oc(nn1)-c1cc2OCCOc2cc1	IC50	=	41.6	uM	F	CELL-LINE	HepG2	362.356
S(Cc1ccc(F)cc1F)c1oc(nn1)-c1cc2OCCOc2cc1	IC50	=	38.7	uM	F	CELL-LINE	HepG2	362.356
o1c(ccc1\C=C\C(=O)N[O-])\C=C\C(=O)c1cc2c(cc(OC)cc2)cc1	IC50	=	6.22	uM	F	CELL-LINE	HepG2	362.361
O(C)c1c(OC)cc(cc1OC)\C=C(\C(=O)c1c2c([nH]c1)cccc2)/C#N	IC50	=	37.28	uM	F	CELL-LINE	HepG2	362.385
Fc1ccc(cc1)-c1cc(ccc1)C(=O)\C=C\c1cc(OC)c(OC)cc1	IC50	=	5.37	uM	F	CELL-LINE	HepG2	362.4
Fc1cc(ccc1)-c1cc(ccc1)C(=O)\C=C\c1cc(OC)c(OC)cc1	IC50	=	1.17	uM	F	CELL-LINE	HepG2	362.4
Fc1cc(ccc1)-c1cc(ccc1)C(=O)\C=C\c1cccc(OC)c1OC	IC50	=	9.2	uM	F	CELL-LINE	HepG2	362.4
O=C1c2cc(NC(=O)CC[NH2+]CCO)ccc2-c2nccc3c2c1ccc3	IC50	=	3.88	uM	F	CELL-LINE	HepG2	362.409
O=C1Nc2c(cccc2)C12[NH+](CC1C2C(=O)N(C1=O)c1ccc(cc1)C)C	IC50	=	77.09	uM	F	CELL-LINE	HepG2	362.409
S(=O)(=O)(NCCc1cc(OC)c(OC)cc1)c1ccc(N=[N+]=[N-])cc1	IC50	=	122.32	uM	F	CELL-LINE	HepG2	362.41
O1[C@H]2OC[C@]3([C@@H]4[C@]2([C@H]2[C@@]5([C@]1(O)[C@H]4O)[C@H](O)[C@@H](CC2)C(=C)C5=O)CCC3)C	IC50	=	4.2	uM	F	CELL-LINE	HepG2	362.422
O=C1[C@]23[C@H]([C@]4([C@H](C(=O)[C@@H]2O)C(CCC4)(C)C)C=O)[C@@H](O)C[C@H]([C@H]3O)C1=C	IC50	=	0.19	uM	F	CELL-LINE	HepG2	362.422
O=C1[C@]23[C@H]([C@]4([C@H]([C@H](O)C2=O)C(CCC4)(C)C)C=O)[C@@H](O)C[C@H]([C@H]3O)C1=C	IC50	=	4.5	uM	F	CELL-LINE	HepG2	362.422
O1C2O[C@@H]3[C@]45[C@H]([C@@]26[C@H]([C@H](O)[C@]14O)C(CC[C@@H]6O)(C)C)CC[C@@H]3C(=C)C5=O	IC50	=	0.96	uM	F	CELL-LINE	HepG2	362.422
O1[C@@H]2[C@]3([C@H]([C@@H](OC3)O)C(CC2)(C)C)[C@H]2[C@]3(C[C@@H](C[C@@H]2O)C(=C)C3=O)C1=O	IC50	=	1.62	uM	F	CELL-LINE	HepG2	362.422
O1[C@@H]2[C@]3([C@H]([C@@H](OC3)O)C(CC2)(C)C)[C@H]2[C@]3(C[C@@H](C[C@H]2O)C(=C)C3=O)C1=O	IC50	=	1.92	uM	F	CELL-LINE	HepG2	362.422
O1[C@@H]2[C@]3([C@H]([C@@H](OC3)O)C(C)(C)[C@@H](O)C2)[C@H]2[C@]3(C[C@@H](CC2)C(=C)C3=O)C1=O	IC50	=	2.02	uM	F	CELL-LINE	HepG2	362.422
o1c2c(cccc2)c(C#CCO[C@@H]2O[C@@H](C)[C@H](O)CC2)c1-c1ccccc1	IC50	=	15.3	uM	F	CELL-LINE	HepG2	362.425
o1c2c(cccc2)c(C#CCO[C@H]2O[C@@H](C)[C@H](O)CC2)c1-c1ccccc1	IC50	=	22.3	uM	F	CELL-LINE	HepG2	362.425
O(C)c1cc(ccc1O)\C=C\C(=O)\C=C\c1nc2c(n1C)ccc(C)c2C	IC50	=	8.5	uM	F	CELL-LINE	HepG2	362.429
O(C)c1ccc(cc1O)\C=C\C(=O)\C=C\c1nc2c(n1C)ccc(C)c2C	IC50	=	3.9	uM	F	CELL-LINE	HepG2	362.429
S(Cc1ccc(F)cc1)c1nnc(n1-c1ccccc1)-c1ccncc1	IC50	=	15.62	uM	F	CELL-LINE	HepG2	362.432
o1c2c(cccc2)c(C#CCO[C@@H]2O[C@@H](C)[C@@H]([NH3+])CC2)c1-c1ccccc1	IC50	=	7.9	uM	F	CELL-LINE	HepG2	362.449
o1c2c(cccc2)c(C#CCO[C@H]2O[C@@H](C)[C@@H]([NH3+])CC2)c1-c1ccccc1	IC50	=	6.7	uM	F	CELL-LINE	HepG2	362.449
S=C1OC(=NN1CN(CC)c1ccccc1)c1nc2c(cc1)cccc2	IC50	=	20.6	uM	F	CELL-LINE	HepG2	362.457
O1[C@@]23[C@H](CC[C@](O)(C2)C(=C)C1=O)[C@@]1([C@H](CC3)[C@@](CCC1)(C(OC)=O)C)C	IC50	=	0.16	uM	F	CELL-LINE	HepG2	362.466
O(C\C=C(\CC\C=C(\C)/C)/C)c1c2nc3c(nc2ccc1)c(OC)ccc3	IC50	=	52.7	uM	F	CELL-LINE	HepG2	362.473
O1[C@H](CO)[C@H](O)[C@H](O)[C@@H](O)[C@H]1OCCCCCCCCCCCCC	IC50	=	89.9	uM	F	CELL-LINE	HepG2	362.507
O1[C@H](CO)[C@H](O)[C@H](O)[C@@H](O)[C@@H]1OCCCCCCCCCCCCC	IC50	=	142.5	uM	F	CELL-LINE	HepG2	362.507
O1[C@H](CO)[C@H](O)[C@H](O)[C@@H](O)C1OCCCCCCCCCCCCC	IC50	=	54.3	uM	F	CELL-LINE	HepG2	362.507
O(CCCCCC)c1ccc(cc1)C(=O)CC[NH+](CCCC)CCCC	EC50	=	48	uM	F	CELL-LINE	HepG2	362.578
Clc1cc(NC(=S)c2ccc(Cl)cc2OC)c(O)cc1Cl	IC50	=	3.16	uM	F	CELL-LINE	HepG2	362.664
Clc1cc(NC(=S)c2cc(Cl)ccc2OC)c(O)cc1Cl	IC50	=	3.72	uM	F	CELL-LINE	HepG2	362.664
O(C)c1c(OC)cc(cc1OC)C1=C(C(=O)C1=O)c1cc2c([nH]cc2)cc1	IC50	=	0.006	uM	F	CELL-LINE	HepG2	363.369
O(C)c1c(OC)cc(cc1OC)C1=C(C(=O)C1=O)c1cc2[nH]ccc2cc1	IC50	=	0.006	uM	F	CELL-LINE	HepG2	363.369
O1CC2=C(C=C3N(Cc4c3nc3c(c4)c(N)ccc3)C2=O)[C@@](O)(CC)C1=O	IC50	=	0.0035	uM	F	CELL-LINE	HepG2	363.373
Clc1cc(SCCCCCC)cc(Cl)c1C(=O)CC[NH+](C)C	EC50	=	46	uM	F	CELL-LINE	HepG2	363.373
Clc1c(Cl)c(SCCCCCC)ccc1C(=O)CC[NH+](C)C	EC50	=	62	uM	F	CELL-LINE	HepG2	363.373
Clc1cc(SCCCCCC)c(Cl)cc1C(=O)CC[NH+](C)C	EC50	=	27	uM	F	CELL-LINE	HepG2	363.373
Fc1ccc(cc1)-c1cc(ccc1N)C(=O)\C=C\c1cc(OC)c(O)cc1	IC50	=	4.3	uM	F	CELL-LINE	HepG2	363.388
O=C1c2c(cccc2)C(=O)C([O-])=C1CC(COC(=O)c1ccccc1)(C)C	IC50	=	4.85	uM	F	CELL-LINE	HepG2	363.389
s1cc(cc1)-c1c2c(ncnc2OC)n(c1)[C@@H]1O[C@H](CO)[C@@H](O)[C@H]1O	IC50	=	0.43	uM	F	CELL-LINE	HepG2	363.394
S(C)c1ncnc2n(cc(c12)-c1occc1)[C@@H]1O[C@H](CO)[C@@H](O)[C@H]1O	IC50	=	0.22	uM	F	CELL-LINE	HepG2	363.394
s1cccc1-c1c2c(ncnc2OC)n(c1)[C@@H]1O[C@H](CO)[C@@H](O)[C@H]1O	IC50	=	13.9	uM	F	CELL-LINE	HepG2	363.394
Fc1ccc(cc1)-c1cc2c3c(cccc3c1)C(=O)N(CC[NH+](C)C)C2=O	IC50	=	5.09	uM	F	CELL-LINE	HepG2	363.412
O=C1Nc2c(cccc2)C1(c1c2c([nH]c1)cccc2)c1c2c([nH]c1)cccc2	IC50	=	20.4	uM	F	CELL-LINE	HepG2	363.42
S(Cc1ccccc1F)c1nnc(n1-c1ccccc1)-c1nccnc1	IC50	=	19.27	uM	F	CELL-LINE	HepG2	363.42
S(Cc1ccc(F)cc1)c1nnc(n1-c1ccccc1)-c1nccnc1	IC50	=	10.07	uM	F	CELL-LINE	HepG2	363.42
O1c2c(C=CC1(C)C)c(OC)ccc2C(=O)\C=C\c1ccc(N(C)C)cc1	IC50	=	0.73	uM	F	CELL-LINE	HepG2	363.457
O(C)c1c2c([nH+]c(cc2NC2CCCCC2)-c2ccccc2)cc(OC)c1	IC50	=	3.16	uM	F	CELL-LINE	HepG2	363.481
O=C(Nc1cc2nc([nH]c2cc1)-c1ccc(cc1)C)CC[NH+]1CCCCC1	IC50	=	11.9	uM	F	CELL-LINE	HepG2	363.485
Clc1ccc(Nc2ncccc2-c2oc(nn2)Nc2ccccc2)cc1	GI50	=	17.01	uM	F	CELL-LINE	HepG2	363.808
Clc1cc2[nH+]c3c(cc(OC)cc3C)c(NCc3ccccc3)c2cc1	IC50	=	6.05	uM	F	CELL-LINE	HepG2	363.868
Clc1cc2[nH+]c3c(cc(OC)cc3)c(NCCc3ccccc3)c2cc1	IC50	=	2.19	uM	F	CELL-LINE	HepG2	363.868
Clc1ccc(cc1)-c1nc2Sc3c(-n2c1Cn1cccc1)cccc3	IC50	=	3.464	uM	F	CELL-LINE	HepG2	363.872
IC1=CN([C@H]2C[C@H](O)[C@@H](CO)C2=C)C(=O)NC1=O	EC50	=	10.5	uM	F	CELL-LINE	HepG2	364.139
S1CC(OC1COC(=O)NCP(=O)([O-])[O-])N1C=CC(=NC1=O)N	EC50	=	5	uM	F	CELL-LINE	HepG2	364.275
O1CC2=C(C=C3N(Cc4c3nc3c(cc(O)cc3)c4)C2=O)[C@@](O)(CC)C1=O	IC50	=	0.0054	uM	F	CELL-LINE	HepG2	364.357
o1c(ccc1\C=C\c1cc(OC)c(OCc2ccccc2)cc1)C(=O)N[O-]	IC50	=	30.93	uM	F	CELL-LINE	HepG2	364.377
O(C)c1ccccc1N1CCN(CC1)C1=CC(=O)c2c(C1=O)c(O)ccc2	IC50	=	3.9	uM	F	CELL-LINE	HepG2	364.401
O(C)c1cc(ccc1O)\C=C\C(=O)\C=C\c1nc2cc(OC)ccc2n1C	IC50	=	3.8	uM	F	CELL-LINE	HepG2	364.401
O(C)c1ccc(cc1O)\C=C\C(=O)\C=C\c1nc2cc(OC)ccc2n1C	IC50	=	4.2	uM	F	CELL-LINE	HepG2	364.401
s1nc(cc1[N-]C(=O)C(=O)c1c2c(n(c1)Cc1occc1)cccc2)C	IC50	=	7.216	uM	F	CELL-LINE	HepG2	364.405
s1nc(cc1[N-]C(=O)C(=O)c1c2c(n(c1)Cc1ccoc1)cccc2)C	IC50	=	5.962	uM	F	CELL-LINE	HepG2	364.405
O1C[C@@]23[C@H]([C@H](O)[C@@]1(O)[C@]14[C@H]2[C@@H](O)C[C@H]([C@H]1O)C(=C)C4=O)C(CCC3)(C)C	IC50	=	6.4	uM	F	CELL-LINE	HepG2	364.438
O1C[C@@]23[C@H]([C@H](O)[C@@]1(O)[C@]14[C@H]2CC[C@H]([C@H]1O)C(=C)C4=O)C(CC[C@@H]3O)(C)C	IC50	=	3.66	uM	F	CELL-LINE	HepG2	364.438
O1C2(C34Oc5c(cccc5)C(=O)C3=CC(CC4C1(C)C)C2=O)C\C=C(\C)/C	IC50	=	6.77	uM	F	CELL-LINE	HepG2	364.441
O(C)c1cc(cc(OC)c1)\C=C\1/CCC\C(=C/c2ccc(OC)cc2)\C/1=O	IC50	=	58.07	uM	F	CELL-LINE	HepG2	364.441
O(C)c1cc(cc(OC)c1)\C=C\1/CCC\C(=C/c2cc(OC)ccc2)\C/1=O	IC50	=	17.24	uM	F	CELL-LINE	HepG2	364.441
O1C2([C@@]34Oc5c(cccc5)C(=O)C3=C[C@H](C[C@H]4C1(C)C)C2=O)C\C=C(\C)/C	IC50	=	6.77	uM	F	CELL-LINE	HepG2	364.441
S1c2cc(ccc2-n2c1nc(-c1ccccc1)c2C[NH+]1CCOCC1)C	IC50	=	3.288	uM	F	CELL-LINE	HepG2	364.493
S(CCCCCC)c1cc(C)c(C(=O)CC[NH+]2CCOCC2)c(c1)C	EC50	=	35	uM	F	CELL-LINE	HepG2	364.574
Brc1cc2c([nH]cc2\C=C\C2=Nc3c(cccc3)C2(C)C)cc1	IC50	=	9.1	uM	F	CELL-LINE	HepG2	365.274
Brc1ccccc1CSc1sc(nn1)-c1nccnc1	IC50	=	9.81	uM	F	CELL-LINE	HepG2	365.279
Brc1cc(ccc1)CSc1sc(nn1)-c1nccnc1	IC50	=	1.79	uM	F	CELL-LINE	HepG2	365.279
Brc1ccc(cc1)CSc1sc(nn1)-c1nccnc1	IC50	=	0.78	uM	F	CELL-LINE	HepG2	365.279
Oc1ccccc1C(OCC(CC1=C([O-])C(=O)c2c(cccc2)C1=O)C)=O	IC50	=	11.62	uM	F	CELL-LINE	HepG2	365.361
O1c2c(C=CC1(C)C)c(OC)ccc2C(=O)\C=C\c1ccc([N+](=O)[O-])cc1	IC50	=	2.61	uM	F	CELL-LINE	HepG2	365.385
O1c2c(C=CC1(C)C)c(OC)ccc2C(=O)\C=C\c1cc([N+](=O)[O-])ccc1	IC50	=	2.83	uM	F	CELL-LINE	HepG2	365.385
O(C)c1ccc(cc1)CN1c2c(cc(cc2)\C=C\C(OCC)=O)C(=O)C1=O	IC50	=	0.09	uM	F	CELL-LINE	HepG2	365.385
S(CC(=O)N\N=C\C=C\c1ccccc1)c1oc(nn1)-c1ccncc1	IC50	=	7.42	uM	F	CELL-LINE	HepG2	365.417
s1c2CCCCc2c2c1nc(nc2NC(=O)N[O-])\C=C\c1ccccc1	IC50	=	3.27	uM	F	CELL-LINE	HepG2	365.437
S(Cc1ccccc1)c1nc(NC(=O)C)cc(OCc2ccccc2)n1	GI50	=	42.9	uM	F	CELL-LINE	HepG2	365.457
S(Cc1ccccc1)C1=NC(NC(=O)C)=CC(=O)N1Cc1ccccc1	GI50	=	71.7	uM	F	CELL-LINE	HepG2	365.457
O(C)c1c2c([nH+]c(cc2N2CC[NH+](CC2)C)-c2ccccc2)cc(OC)c1	IC50	=	22.55	uM	F	CELL-LINE	HepG2	365.477
S(CC)[C@H]1[C@@H](SCC)[C@@H](O[C@@H]1CO)n1nnc(c1)-c1ccccc1	EC50	=	9.6	uM	F	CELL-LINE	HepG2	365.522
O[C@H]1CC[C@]2([C@@H](CCN(C2)C(=O)CCCCCCCCCCC)[C@@H]1C)C	IC50	=	0.7	uM	F	CELL-LINE	HepG2	365.602
Clc1ccc(cc1)-c1oc(SCCn2c(ncc2[N+](=O)[O-])C)nn1	IC50	=	7.8	uM	F	CELL-LINE	HepG2	365.801
Clc1ccccc1-c1oc(SCCn2c(ncc2[N+](=O)[O-])C)nn1	IC50	=	15.6	uM	F	CELL-LINE	HepG2	365.801
Clc1cc2[nH+]c3c(cc(OC)cc3)c(Nc3ccc(OC)cc3)c2cc1	IC50	=	6.3	uM	F	CELL-LINE	HepG2	365.84
Clc1cc2[nH+]c3c(cc(OC)cc3)c(Nc3cc(OC)ccc3)c2cc1	IC50	=	14.9	uM	F	CELL-LINE	HepG2	365.84
Fc1ccc(N2C(=O)C3C(C[NH+](C)C34c3c(NC4=O)cccc3)C2=O)cc1	IC50	=	87.31	uM	F	CELL-LINE	HepG2	366.372
O(C)c1ccc(cc1)CN1c2c(cc(cc2)\C=C\C(OC)=O)\C(=N\O)\C1=O	IC50	=	3.56	uM	F	CELL-LINE	HepG2	366.373
O(C)c1cc(cc(OC)c1)\C=C\1/CCC\C(=C/c2cc(O)c(O)cc2)\C/1=O	IC50	=	1.01	uM	F	CELL-LINE	HepG2	366.413
O1c2c(C=CC1(C)C)c(OC)ccc2C(=O)\C=C\c1cc(O)c(OC)cc1	IC50	=	0.45	uM	F	CELL-LINE	HepG2	366.413
s1c2CCCCc2c2c1N=C(N(C(=O)N[O-])C2=O)\C=C\c1ccccc1	IC50	=	51.98	uM	F	CELL-LINE	HepG2	366.421
O(C)c1cc2c3c(c4c(cc(OC)cc4)c2cc1O)[C@H](O)[C@H]1[NH+](CCC1)C3	GI50	=	0.011	uM	F	CELL-LINE	HepG2	366.437
O=C/1Nc2ncccc2\C\1=C\c1[nH]c(C)c(C(=O)N2CC[NH+](CC2)C)c1C	IC50	=	37.3	uM	F	CELL-LINE	HepG2	366.445
O=C1N(CC[NH+](C)C)C(=O)c2c3c1cc1nnn(c1c3ccc2)CCCC	IC50	=	1.01	uM	F	CELL-LINE	HepG2	366.445
s1c(cnc1N(Cc1ccc(cc1)C(=O)N[O-])CC)-c1ccc(cc1)C	GI50	=	1.12	uM	F	CELL-LINE	HepG2	366.465
O(C)c1cc2cc(c3c(cc(O)cc3)c2cc1OC)C[NH+]1CCCC[C@@H]1C	IC50	=	8.33	uM	F	CELL-LINE	HepG2	366.481
o1c2c(cccc2)c(CCCO[C@@H]2O[C@@H](C)[C@@H]([NH3+])CC2)c1-c1ccccc1	IC50	=	7.7	uM	F	CELL-LINE	HepG2	366.481
O(C)c1cc2c3c(CC[NH+](C3)CCC)c3c(cc(OC)cc3)c2cc1OC	GI50	=	0.48	uM	F	CELL-LINE	HepG2	366.481
O(C)c1c2c(c3CC[NH+](Cc3c3cc(OC)ccc23)CCC)ccc1OC	GI50	=	6.29	uM	F	CELL-LINE	HepG2	366.481
O(C)c1cc2c3CC[NH+](Cc3c3cc(OC)ccc3c2cc1OC)CCC	GI50	=	4.48	uM	F	CELL-LINE	HepG2	366.481
O(C)c1cc2c3CC[NH+](Cc3c3c(cc(OC)cc3)c2cc1OC)CCC	GI50	=	3.17	uM	F	CELL-LINE	HepG2	366.481
S1c2c(-n3cc(nc13)-c1cc(OCC[NH+](CC)CC)ccc1)cccc2	IC50	=	2.02	uM	F	CELL-LINE	HepG2	366.509
S(=O)(=O)(CCCCCC)c1cc(C)c(C(=O)CC[NH+]2CC2C)c(c1)C	EC50	=	35	uM	F	CELL-LINE	HepG2	366.546
O(CCCCCCCCCC)c1cc2n(c3c(c2cc1)ccnc3C)CC	IC50	=	14.1	uM	F	CELL-LINE	HepG2	366.549
O(CCCCCCCC)c1cc2n(c3c(c2cc1)ccnc3C)CCCC	IC50	=	13.6	uM	F	CELL-LINE	HepG2	366.549
O[C@H]1CC[C@]2([C@@H](CC[NH+](C2)C(CCCC(CCCC(C)C)C)C)[C@@H]1C)C	IC50	=	0.07	uM	F	CELL-LINE	HepG2	366.654
Clc1nccc(c1)-c1oc(SCCn2c(ncc2[N+](=O)[O-])C)nn1	IC50	=	11.6	uM	F	CELL-LINE	HepG2	366.789
Clc1cc(Nc2ncnc3c2cc(NCc2sccc2)cc3)ccc1	IC50	=	3.58	uM	F	CELL-LINE	HepG2	366.876
O(C)c1cc(ccc1O)\C=C\C(=O)\C=C(/[O-])\C=C\c1cc(OC)c(O)cc1	IC50	=	35.53	uM	F	CELL-LINE	HepG2	367.377
O(C)c1c(OC)cc(cc1OC)C=1N(C(=O)C=CC=1)c1ccc(OC)cc1	IC50	=	5.738	uM	F	CELL-LINE	HepG2	367.401
O1c2c(ccc(c2)C[NH+]2CC[NH2+]CC2)C(=O)C=C1c1ccc([N+](=O)[O-])cc1	IC50	=	4.53	uM	F	CELL-LINE	HepG2	367.405
S(=O)(=O)(Nc1ncccc1)c1ccc(NCC(=O)c2ccccc2)cc1	IC50	=	6.75	uM	F	CELL-LINE	HepG2	367.429
Fc1ccc(cc1)Cn1c2c(c3c1c[n+](cc3)Cc1ccccc1)cccc2	IC50	=	23.4	uM	F	CELL-LINE	HepG2	367.447
s1cc(nc1N(N(S(=O)(=O)c1ccc(cc1)C)C(=O)C)C(=O)C)C	IC50	=	7.36	uM	F	CELL-LINE	HepG2	367.45
Fc1ccc(cc1)\C=N\Nc1nc(NCCC[NH+](C)C)c2c(n1)cccc2	IC50	=	0.88	uM	F	CELL-LINE	HepG2	367.452
s1c2CCCCc2c2c1N=C(N(C(=S)N)C2=O)\C=C\c1ccccc1	IC50	=	17.69	uM	F	CELL-LINE	HepG2	367.497
O=C(NCCCCCC[NH3+])c1ncc2n(c3c(c2c1)cccc3)CCCC	IC50	=	95.4993	uM	F	CELL-LINE	HepG2	367.517
Clc1ccc(cc1)C1CCN(CC1)C1=CC(=O)c2c(C1=O)c(O)ccc2	IC50	=	5.4	uM	F	CELL-LINE	HepG2	367.832
Clc1cc(OCCCCCC)ccc1C(=O)CC[NH+]1CC(=O)NCC1	EC50	=	60	uM	F	CELL-LINE	HepG2	367.897
Brc1cc(ccc1)-c1oc(nn1)CCc1c2c([nH]c1)cccc2	IC50	=	33	uM	F	CELL-LINE	HepG2	368.234
Brc1ccc(cc1)-c1nc(ncc1)Nc1ccccc1C(C)C	IC50	=	7.03	uM	F	CELL-LINE	HepG2	368.278
S(=O)(=O)(N)c1ccc(Nc2c3c([nH+]cc2)cc(cc3)C(F)(F)F)cc1	IC50	=	50.76	uM	F	CELL-LINE	HepG2	368.359
S(=O)(=O)(Nc1c2c([nH+]cc1)cc(cc2)C(F)(F)F)c1ccc(N)cc1	IC50	=	93.11	uM	F	CELL-LINE	HepG2	368.359
Fc1cc(OC)ccc1\C=C\C(=O)c1c2OC(C=Cc2c(OC)cc1)(C)C	IC50	=	7.56	uM	F	CELL-LINE	HepG2	368.404
O=C1N(CCC[NH+](C)C)C(=O)c2c3c1cc1nnn(c1c3ccc2)CCO	IC50	=	5.21	uM	F	CELL-LINE	HepG2	368.417
O(C)c1cc2c3c(c4c(cc(OC)cc4)c2cc1OC)C(O)C[NH+](C3)CC	GI50	=	0.04	uM	F	CELL-LINE	HepG2	368.453
s1c2c(CCCC2)c(N)c1C(=O)NN1C(=Nc2c(cc(cc2)C)C1=O)C	IC50	=	22	uM	F	CELL-LINE	HepG2	368.461
O1[C@@H]2O[C@@]3(OO[C@]24[C@@H](CC[C@H]([C@@H]4CC3)C)[C@@H](C)[C@H]1OC(=O)C(C)(C)C)C	IC50	=	40	uM	F	CELL-LINE	HepG2	368.47
O(CCCCCC)c1ccc(cc1Cc1ccccc1)C(=O)CC[NH+](C)C	EC50	=	24	uM	F	CELL-LINE	HepG2	368.541
[NH+](CCC[NH2+]Cc1ncc2n(c3c(c2c1)cccc3)CCCC)(CC)CC	IC50	=	4.6	uM	F	CELL-LINE	HepG2	368.569
[NH+](CCC[NH2+]Cc1nccc2c1n(c1c2cccc1)CCCC)(CC)CC	IC50	=	27.1	uM	F	CELL-LINE	HepG2	368.569
[NH+](CCC[NH2+]Cc1nccc2c1n(c1c2cccc1)CC(C)C)(CC)CC	IC50	=	53.8	uM	F	CELL-LINE	HepG2	368.569
Clc1ccccc1N1CCN(CC1)C1=CC(=O)c2c(C1=O)c(O)ccc2	IC50	=	7.7	uM	F	CELL-LINE	HepG2	368.82
Clc1cc2nc(n(c2cc1)C)\C=C\C(=O)\C=C\c1cc(OC)c(O)cc1	IC50	=	4	uM	F	CELL-LINE	HepG2	368.82
Clc1cc2nc(n(c2cc1)C)\C=C\C(=O)\C=C\c1cc(O)c(OC)cc1	IC50	=	4.1	uM	F	CELL-LINE	HepG2	368.82
Clc1ccc(NCN2N=C(OC2=S)c2nc3c(cc2)cccc3)cc1	IC50	=	0.8	uM	F	CELL-LINE	HepG2	368.848
Clc1cc(NCN2N=C(OC2=S)c2nc3c(cc2)cccc3)ccc1	IC50	=	18.1	uM	F	CELL-LINE	HepG2	368.848
Clc1ccccc1NCN1N=C(OC1=S)c1nc2c(cc1)cccc2	IC50	=	25.7	uM	F	CELL-LINE	HepG2	368.848
Clc1ccc(cc1)\C=C\1/CCC\C(=C/c2cc(OC)cc(OC)c2)\C/1=O	IC50	=	25.48	uM	F	CELL-LINE	HepG2	368.86
Clc1ccccc1\C=C\1/CCC\C(=C/c2cc(OC)cc(OC)c2)\C/1=O	IC50	=	5.67	uM	F	CELL-LINE	HepG2	368.86
Clc1cc(ccc1)\C=C\1/CCC\C(=C/c2cc(OC)cc(OC)c2)\C/1=O	IC50	=	6.11	uM	F	CELL-LINE	HepG2	368.86
O(C)c1c(OC)cc(cc1OC)C1=C(C(=O)C1=O)c1cc(N)c(OC)cc1	IC50	=	0.005	uM	F	CELL-LINE	HepG2	369.373
S(CC(=O)N\N=C\c1cc(OC)ccc1)c1oc(nn1)-c1ccncc1	IC50	=	9.17	uM	F	CELL-LINE	HepG2	369.405
S(CC(=O)N\N=C\c1ccc(OC)cc1)c1oc(nn1)-c1ccncc1	IC50	=	15.84	uM	F	CELL-LINE	HepG2	369.405
Clc1ccc(cc1)\C=N\Nc1nc(NCC[NH+](C)C)c2c(n1)cccc2	IC50	=	0.37	uM	F	CELL-LINE	HepG2	369.88
Clc1ccccc1Nc1c2cc(OC)ccc2[nH+]c2c1ccc(Cl)c2	IC50	=	30.2	uM	F	CELL-LINE	HepG2	370.259
Clc1ccc(nc1)NC(=O)CSc1ccc(NC(=O)CCl)cc1	IC50	=	3.6	uM	F	CELL-LINE	HepG2	370.26
O(C)c1c(OC)cc(cc1OC)C1=C(C(=O)C1=O)c1cc(O)c(OC)cc1	IC50	=	0.014	uM	F	CELL-LINE	HepG2	370.357
Oc1c2c(C(=O)C=C([C@@H](OC(=O)\C=C(\C)/C)C\C=C(\C)/C)C2=O)c(O)cc1	IC50	=	1	uM	F	CELL-LINE	HepG2	370.401
o1c2c(c(c3c(C(=O)[C@H]4O[C@H]4[C@@H]3C)c2OC)COC(=O)\C(=C/C)\C)c(c1)C	IC50	=	27.8	uM	F	CELL-LINE	HepG2	370.401
O=C1c2c(cccc2)C(=O)C=C1CCCOC(=O)c1cc2c(cc1)cccc2	IC50	=	10.22	uM	F	CELL-LINE	HepG2	370.404
O1N=C([C@H]([C@@]12c1c(NC2=O)cccc1)c1ccccc1)c1ccc(OC)cc1	GI50	=	77.77	uM	F	CELL-LINE	HepG2	370.408
O(CC(=O)C)c1ccc(cc1)-c1nccc(c1)-c1c[nH]nc1-c1ncccc1	IC50	=	0.268	uM	F	CELL-LINE	HepG2	370.412
O1c2c(C=CC1(C)C)c(OC)ccc2C(=O)\C=C\c1cc2c(cc1)cccc2	IC50	=	0.21	uM	F	CELL-LINE	HepG2	370.448
O1O[C@@H](CC[C@@]1(CCC(=O)C(CCCC(=O)C)(C)C)C)[C@@H](C(OC)=O)C	IC50	=	11.9	uM	F	CELL-LINE	HepG2	370.486
O(CC)c1ccccc1C[NH+]1CCC[NH+](CC1)Cc1ccccc1OCC	IC50	=	71	uM	F	CELL-LINE	HepG2	370.537
O=C/1C[C@]2([C@H]3[C@]4([C@@]5(C(CC3)C(C)(C)[C@@H]([NH2+]C)CC5)C4)CC[C@]2(C)\C\1=C\C)C	IC50	=	14.92	uM	F	CELL-LINE	HepG2	370.601
[NH+]1(CCC[NH+](CC1)CC=1CC[C@@H](CC=1)C(C)=C)CC=1CC[C@@H](CC=1)C(C)=C	IC50	=	81	uM	F	CELL-LINE	HepG2	370.625
[NH+]1(CCC[NH+](CC1)C1C2CC3CC1CC(C2)C3)C1C2CC3CC1CC(C2)C3	IC50	=	132	uM	F	CELL-LINE	HepG2	370.625
[NH+]1(CCC[NH+](CC1)CC=1C2CC(CC=1)C2(C)C)CC=1C2CC(CC=1)C2(C)C	IC50	=	110	uM	F	CELL-LINE	HepG2	370.625
[se]1c(C(OCC)=O)c(nc1N\N=C\c1ccc(Cl)cc1)C	IC50	=	52.77	uM	F	CELL-LINE	HepG2	370.701
Clc1cc(\C=C\C(=O)c2c3OC(C=Cc3c(OC)cc2)(C)C)c(O)cc1	IC50	=	6.64	uM	F	CELL-LINE	HepG2	370.832
Clc1c2[nH]c3c(CCN(C(=O)CC[NH3+])C3c3cc(O)ccc3)c2ccc1	IC50	=	7.47	uM	F	CELL-LINE	HepG2	370.86
Clc1ccccc1C=1Oc2c(ccc(c2)C[NH+]2CC[NH+](CC2)C)C(=O)C=1	IC50	=	14.2	uM	F	CELL-LINE	HepG2	370.88
Clc1ccccc1C=1Oc2c(cc(cc2)C[N+](CC)(CC)CC)C(=O)C=1	IC50	=	61	uM	F	CELL-LINE	HepG2	370.9
Clc1cc(SCCCCCC)ccc1C(=O)CC[NH+]1CCOCC1	EC50	=	37	uM	F	CELL-LINE	HepG2	370.965
Brc1ccc(cc1)-c1nc(ncc1)Nc1ccc([N+](=O)[O-])cc1	IC50	=	42.98	uM	F	CELL-LINE	HepG2	371.194
Clc1ccccc1C=1Oc2c(cc(Cl)cc2Cn2ccnc2)C(=O)C=1	IC50	=	3.27	uM	F	CELL-LINE	HepG2	371.223
O=C1C=2C(=Nc3n(ncn3)C=2c2ccc([N+](=O)[O-])cc2)c2c(cccc2)C1=O	IC50	=	4.74	uM	F	CELL-LINE	HepG2	371.312
O=C1C=2C(=Nc3n(ncn3)C=2c2cc([N+](=O)[O-])ccc2)c2c(cccc2)C1=O	IC50	=	15.31	uM	F	CELL-LINE	HepG2	371.312
S(Cc1ccc([N+](=O)[O-])cc1)c1oc(nn1)-c1cc2OCCOc2cc1	IC50	=	35.44	uM	F	CELL-LINE	HepG2	371.373
S(Cc1ccccc1[N+](=O)[O-])c1oc(nn1)-c1cc2OCCOc2cc1	IC50	=	38.05	uM	F	CELL-LINE	HepG2	371.373
S(Cc1cc([N+](=O)[O-])ccc1)c1oc(nn1)-c1cc2OCCOc2cc1	IC50	=	38.3	uM	F	CELL-LINE	HepG2	371.373
S(CC(=O)N\N=C\c1cc(O)c(O)cc1)c1oc(nn1)-c1ccncc1	IC50	=	0.76	uM	F	CELL-LINE	HepG2	371.377
O(C)c1c(OC)c2n(cc(c2cc1OC)C(=O)c1cc(O)c(OC)cc1)C	IC50	=	0.04445	uM	F	CELL-LINE	HepG2	371.389
Fc1cc\2c(NC(=O)/C/2=C\C=2NC(=O)C(=CC=2)C(=O)NCC[NH+](C)C)cc1	IC50	=	17.1	uM	F	CELL-LINE	HepG2	371.392
O=C1c2cc(ccc2N(Cc2cc3c(cc2)cccc3)C1=O)\C=C\C(OC)=O	IC50	=	0.09	uM	F	CELL-LINE	HepG2	371.392
O1c2c(C=CC1(C)C)c(OC)ccc2C(=O)\C=C\c1nc2c(cc1)cccc2	IC50	=	4.28	uM	F	CELL-LINE	HepG2	371.436
O(C)c1c2c([nH+]c(cc2NCc2ccccc2)-c2ccccc2)cc(OC)c1	IC50	=	10.91	uM	F	CELL-LINE	HepG2	371.46
S1CC(=O)N=C1N1N=C(CC1c1c2c(ccc1)cccc2)c1ccccc1	IC50	=	10.07	uM	F	CELL-LINE	HepG2	371.464
S1CC(=O)N=C1N1N=C(CC1c1cc2c(cc1)cccc2)c1ccccc1	IC50	=	15.73	uM	F	CELL-LINE	HepG2	371.464
s1c2cc(NC(=O)C)ccc2nc1SCC(=O)NCc1ccccc1	IC50	=	9.2	uM	F	CELL-LINE	HepG2	371.485
[n+]1(cc2n(c3c(c2cc1)cccc3)CCCc1ccccc1)CCCCCC	IC50	=	4.3	uM	F	CELL-LINE	HepG2	371.548
[n+]1(cc2n(c3c(c2cc1)cccc3)CCCCCCCC)Cc1ccccc1	IC50	=	6.5	uM	F	CELL-LINE	HepG2	371.548
Clc1ccc(cc1)-c1nc(ncc1)Nc1cc(OC)c(OC)c(OC)c1	IC50	=	0.09	uM	F	CELL-LINE	HepG2	371.824
Clc1cc(ccc1Cl)-c1oc(nn1)CCCc1c2c([nH]c1)cccc2	IC50	=	36	uM	F	CELL-LINE	HepG2	372.255
FC(F)(F)\C=C\C(O[C@@H]([C@@H](O)[C@@H]1OC(=O)C=C[C@@H]1O)c1ccccc1)=O	IC50	=	1.8	uM	F	CELL-LINE	HepG2	372.295
Fc1cc(ccc1OC)C1=C(C(=O)C1=O)c1cc(OC)c(OC)c(OC)c1	IC50	=	0.105	uM	F	CELL-LINE	HepG2	372.348
O1C(C(O[C@@H](C\C=C(\C)/C)C2=CC(=O)c3c(C2=O)c(O)ccc3O)=O)C1C	IC50	=	0.34	uM	F	CELL-LINE	HepG2	372.373
O1[C@]23[C@@H]([C@](C)(C(=O)C=C2)C1=O)[C@@H]([C@]12[C@H]3CC[C@](O)(C1)C(=C)C2=O)C(OC)=O	IC50	=	37.2	uM	F	CELL-LINE	HepG2	372.373
o1c(ccc1\C=C\C(=O)N[O-])C[NH+](CCc1cc2OCOc2cc1)CCC	EC50	=	28.72	uM	F	CELL-LINE	HepG2	372.421
S1CC(OC1COC(=O)NCCCCCCO)N1C=CC(=NC1=O)N	EC50	=	5	uM	F	CELL-LINE	HepG2	372.446
O=C1c2cc(NC(=O)CC[NH+]3CCCC3)ccc2-c2nccc3c2c1ccc3	IC50	=	8.18	uM	F	CELL-LINE	HepG2	372.448
s1c(ccc1-c1sccc1)-c1cc2sc(C(OC)=O)c(N)c2nc1	GI50	=	70.6	uM	F	CELL-LINE	HepG2	372.493
O(CCCc1ccccc1)c1cc2n(c3c(c2cc1)ccnc3C)CCCC	IC50	=	15.6	uM	F	CELL-LINE	HepG2	372.512
O(CC(C)C)c1cc2n(c3c(c2cc1)ccnc3C)CCCc1ccccc1	IC50	=	12.9	uM	F	CELL-LINE	HepG2	372.512
O(CCCC)c1cc2n(c3c(c2cc1)ccnc3C)CCCc1ccccc1	IC50	=	12.4	uM	F	CELL-LINE	HepG2	372.512
O(CCCc1ccccc1)c1cc2n(c3c(c2cc1)ccnc3C)CC(C)C	IC50	=	27.7	uM	F	CELL-LINE	HepG2	372.512
O(CC[NH+](C)C)c1ccc(cc1)\C(=C(\CC)/c1ccccc1)\c1ccccc1	IC50	=	23.4	uM	F	CELL-LINE	HepG2	372.532
Brc1cc(O)c(NC(=S)c2ccc(Cl)cc2OC)cc1	IC50	=	3.88	uM	F	CELL-LINE	HepG2	372.67
Brc1cc(NC(=S)c2ccc(Cl)cc2OC)c(O)cc1	IC50	=	6.53	uM	F	CELL-LINE	HepG2	372.67
Brc1cc(O)c(NC(=S)c2cc(Cl)ccc2OC)cc1	IC50	=	7.6	uM	F	CELL-LINE	HepG2	372.67
Brc1cc(NC(=S)c2cc(Cl)ccc2OC)c(O)cc1	IC50	=	8.74	uM	F	CELL-LINE	HepG2	372.67
Clc1ccc(OCCCCCC\N=C(\Nc2cc[nH+]cc2)/NC#N)cc1	IC50	=	1.245	uM	F	CELL-LINE	HepG2	372.88
Clc1cc(S(=O)(=O)CCCCCC)ccc1C(=O)CC[NH+]1CC1C	EC50	=	164	uM	F	CELL-LINE	HepG2	372.937
Fc1ccc(cc1)C(=O)Nc1cc2c(oc(C(=O)c3ccccc3)c2C)cc1	IC50	=	31.2	uM	F	CELL-LINE	HepG2	373.383
S(CCn1c(ncc1[N+](=O)[O-])C)c1oc(nn1)-c1ccc(cc1)C(C)C	IC50	=	4.3	uM	F	CELL-LINE	HepG2	373.437
O1c2c(C=CC1(C)C)c(OC)ccc2C(=O)\C=C\c1c2c(n(c1)C)cccc2	IC50	=	2.23	uM	F	CELL-LINE	HepG2	373.452
O1c2c(C=CC1(C)C)c(OC)ccc2C(=O)\C=C\c1c2c(n(cc2)C)ccc1	IC50	=	2.75	uM	F	CELL-LINE	HepG2	373.452
O1c2c(C=CC1(C)C)c(OC)ccc2C(=O)\C=C\c1cc2c(n(cc2)C)cc1	IC50	=	0.84	uM	F	CELL-LINE	HepG2	373.452
O1c2c(C=CC1(C)C)c(OC)ccc2C(=O)\C=C\c1cc2n(ccc2cc1)C	IC50	=	8.85	uM	F	CELL-LINE	HepG2	373.452
s1ccnc1NS(=O)(=O)c1ccc(NCC(=O)c2ccccc2)cc1	IC50	=	6.78	uM	F	CELL-LINE	HepG2	373.457
O=C(NN)c1n(nc(c1)-c1c2c(n(c1)CCC)cccc2)Cc1ccccc1	IC50	=	4.71	uM	F	CELL-LINE	HepG2	373.46
O=C(NN)c1n(nc(c1)-c1c2c(n(c1)Cc1ccccc1)cccc2)CCC	IC50	=	3.59	uM	F	CELL-LINE	HepG2	373.46
O=C(NCC[NH3+])c1nccc2c1n(c1c2cccc1)CCCc1ccccc1	IC50	=	15.9	uM	F	CELL-LINE	HepG2	373.48
S1c2cc(OCC)ccc2-n2c1nc(-c1ccccc1)c2Cn1cccc1	IC50	=	3.76	uM	F	CELL-LINE	HepG2	373.48
O(CCCC)c1cc2n(c3c(c2cc1)cc[n+](Cc1ccccc1)c3C)CC	IC50	=	10	uM	F	CELL-LINE	HepG2	373.52
O(CC(C)C)c1cc2n(c3c(c2cc1)cc[n+](Cc1ccccc1)c3C)CC	IC50	=	9.6	uM	F	CELL-LINE	HepG2	373.52
[NH3+]CCCCNc1nccc2c1n(c1c2cccc1)CCCc1ccccc1	IC50	=	4	uM	F	CELL-LINE	HepG2	373.524
Clc1ccc(cc1)\C=N\NC(=O)CSc1oc(nn1)-c1ccncc1	IC50	=	15.65	uM	F	CELL-LINE	HepG2	373.824
O1c2c(c(O)c(OC)c(OC)c2O)C(=O)C=C1c1cc(OC)c(OC)cc1	IC50	=	45	uM	F	CELL-LINE	HepG2	374.345
O1c2c(cc(OC)c(OC)c2O)C(=O)C=C1c1cc(OC)c(OC)c(O)c1	IC50	=	30	uM	F	CELL-LINE	HepG2	374.345
F[C@@]12CC[C@@H]3[C@](C1)([C@H]([C@H]1[C@]34OC(=O)[C@@]1(C)C(=O)C=C4)C(OC)=O)C(=O)C2=C	IC50	=	40.6	uM	F	CELL-LINE	HepG2	374.364
o1c2c(nc1C(n1nnc(c1)\C=C\C(=O)N[O-])Cc1ccccc1)cccc2	GI50	=	5.9	uM	F	CELL-LINE	HepG2	374.38
O(C)c1cc(ccc1O[C@@H]([C@@H](O)c1cc(OC)c(O)cc1)CO)\C=C\C=O	IC50	=	38.54	uM	F	CELL-LINE	HepG2	374.389
O(C)c1cc(ccc1O[C@@H]([C@H](O)c1cc(OC)c(O)cc1)CO)\C=C\C=O	IC50	=	38.64	uM	F	CELL-LINE	HepG2	374.389
o1c(ccc1\C=C\C(=O)N[O-])C[NH+](CCc1cc2OCOc2cc1)CCO	EC50	=	104.94	uM	F	CELL-LINE	HepG2	374.393
O(C)c1ccc(NC(=O)Nc2cc3NC(=O)/C(/c3cc2)=C\c2[nH]ccc2)cc1	IC50	=	3.46	uM	F	CELL-LINE	HepG2	374.4
O=C(N1Cc2c(n(nc2NC(=O)c2ccccc2)C(=O)C)C1)c1ccccc1	IC50	=	0.81	uM	F	CELL-LINE	HepG2	374.4
S(CCn1c(ncc1[N+](=O)[O-])C)c1oc(nn1)-c1ccc(N(C)C)cc1	IC50	=	11.9	uM	F	CELL-LINE	HepG2	374.425
O(C)c1c(OC)cc(cc1OC)C1c2c(cc(OC)c(OC)c2OC)CC1	IC50	=	89.7	uM	F	CELL-LINE	HepG2	374.433
O=C1c2cc(NC(=O)CC[NH+](CC)CC)ccc2-c2nccc3c2c1ccc3	IC50	=	12.1	uM	F	CELL-LINE	HepG2	374.464
O1CC(=CC1=O)[C@H]1CC[C@]2(O)[C@H]3[C@H](CC[C@]12C)[C@@]1([C@@H](C[C@@H](O)CC1)CC3)C	IC50	=	18000	uM	F	CELL-LINE	HepG2	374.521
O(Cc1ccccc1)c1ccc(cc1)C[NH+]1CC[NH+](CC1)Cc1ccccc1	IC50	=	54	uM	F	CELL-LINE	HepG2	374.528
[NH+](CCC[NH2+]Cc1nccc2c1n(c1c2cccc1)Cc1ccccc1)(C)C	IC50	=	23.5	uM	F	CELL-LINE	HepG2	374.532
[NH+]1(CCC[NH+](CC1)C1CC2C(CC1)CCCC2)C1CC2C(CC1)CCCC2	IC50	=	54	uM	F	CELL-LINE	HepG2	374.657
Clc1cc2NC(=O)[C@@]3(ON=C([C@H]3c3ccccc3)c3ccccc3)c2cc1	GI50	=	37.07	uM	F	CELL-LINE	HepG2	374.827
Clc1ccc(cc1)C(c1c2c(ccc1O)cccc2)c1ccc(OC)cc1	IC50	=	42	uM	F	CELL-LINE	HepG2	374.867
Clc1cc(c2N=C(OC(=O)c2c1)C1ON=C(C1)c1ccc(Cl)cc1)C	IC50	=	43.6	uM	F	CELL-LINE	HepG2	375.211
Brc1ccc(cc1)-c1[nH]c2c3c(nccc3)c3ncccc3c2n1	IC50	=	4.3	uM	F	CELL-LINE	HepG2	375.229
Clc1c(Cl)c(SCCCCCC)ccc1C(=O)CC[NH+]1CC1C	EC50	=	62	uM	F	CELL-LINE	HepG2	375.384
Clc1cc(SCCCCCC)cc(Cl)c1C(=O)CC[NH+]1CC1C	EC50	=	29	uM	F	CELL-LINE	HepG2	375.384
Clc1cc(SCCCCCC)c(Cl)cc1C(=O)CC[NH+]1CC1C	EC50	=	78	uM	F	CELL-LINE	HepG2	375.384
S(CCn1c(ncc1[N+](=O)[O-])C)c1oc(nn1)-c1ccc(OCC)cc1	IC50	=	1.9	uM	F	CELL-LINE	HepG2	375.409
S(CCn1c(ncc1[N+](=O)[O-])C)c1oc(nn1)-c1ccccc1OCC	IC50	=	9.8	uM	F	CELL-LINE	HepG2	375.409
O=C(N1Cc2c(cccc2)C(c2c1cccc2)c1ccccc1)c1ccccc1	IC50	=	3.4	uM	F	CELL-LINE	HepG2	375.471
Clc1cc(Nc2ncnc3c2cc(NCc2nc(ccc2)C)cc3)ccc1	IC50	=	3.63	uM	F	CELL-LINE	HepG2	375.863
S(CCn1c(ncc1[N+](=O)[O-])C)c1oc(nn1)-c1ccc([N+](=O)[O-])cc1	IC50	=	4.1	uM	F	CELL-LINE	HepG2	376.353
S(CCn1c(ncc1[N+](=O)[O-])C)c1oc(nn1)-c1ccccc1[N+](=O)[O-]	IC50	=	0.7	uM	F	CELL-LINE	HepG2	376.353
Oc1cc(ccc1O)\C=C(\C(=O)NN1C(=Nc2c(cc(cc2)C)C1=O)C)/C#N	IC50	=	8	uM	F	CELL-LINE	HepG2	376.372
O1[C@H]2[C@]34[C@@H](CC1=O)C(=C)[C@@H](O)[C@@](OC3)(O)[C@@H]4[C@@]1([C@@H](C2)C(=CC(=O)[C@H]1O)C)C	IC50	=	10.65	uM	F	CELL-LINE	HepG2	376.405
O(C)c1c(OC)cc(N2C(=CC=CC2=O)c2c3[nH]ccc3ccc2)cc1OC	IC50	=	2.402	uM	F	CELL-LINE	HepG2	376.412
O(C)c1c(OC)cc(cc1OC)\C=C(\C(=O)c1c2c(n(c1)C)cccc2)/C#N	IC50	=	18.61	uM	F	CELL-LINE	HepG2	376.412
O(Cc1cccnc1)C(=O)NCc1ccc(cc1)C(=O)Nc1ccccc1N	IC50	=	0.0009	uM	F	CELL-LINE	HepG2	376.416
o1c(ccc1\C=C\C(=O)N[O-])C[NH+](Cc1ccc(cc1)-c1ccccc1)CC	EC50	=	12.85	uM	F	CELL-LINE	HepG2	376.456
OCC[NH+](Cc1ccc(cc1)C(=O)Nc1ccccc1N)Cc1ccccc1	IC50	=	0.0012	uM	F	CELL-LINE	HepG2	376.48
O1[C@@](CCC1=O)([C@H](O)CC\C(=C\[C@@H](O)C\C(=C\CCc1ccoc1)\C)\C)C	IC50	=	1	uM	F	CELL-LINE	HepG2	376.493
O1[C@]23[C@@H](CC[C@@](O)(C2)C(=C)C1=O)[C@]1([C@@H](CC3)[C@](CCC1)(COC(=O)C)C)C	IC50	=	0.12	uM	F	CELL-LINE	HepG2	376.493
O1[C@H](CO)[C@H](O)[C@H](O)[C@@H](O)[C@H]1OCCCCCCCCCCCCCC	IC50	=	68.1	uM	F	CELL-LINE	HepG2	376.534
O=C(N)Cc1c2cc(ccc2n(c1)CCCCCCCC)-c1cc(ccc1)C	IC50	=	19.3	uM	F	CELL-LINE	HepG2	376.544
[se]1cc(nc1NNC(=O)c1ccc(Cl)cc1)-c1ccccc1	IC50	=	62.89	uM	F	CELL-LINE	HepG2	376.708
ClCCOc1ccc(cc1)-c1nccc(c1)-c1c[nH]nc1-c1ncccc1	IC50	=	0.693	uM	F	CELL-LINE	HepG2	376.847
Clc1cc(Nc2ncnc3c2cc(NCc2ccccc2O)cc3)ccc1	IC50	=	2.08	uM	F	CELL-LINE	HepG2	376.847
Clc1cc(Nc2ncnc3c2cc(NCc2ccc(O)cc2)cc3)ccc1	IC50	=	1.52	uM	F	CELL-LINE	HepG2	376.847
BrCC(=O)Nc1cc(ccc1)C(=O)NC(=O)Nc1ncccc1	IC50	=	0.9	uM	F	CELL-LINE	HepG2	377.198
Brc1ccc(cc1)\C=C\C(=O)c1cc(OC)c(OC)c(OC)c1	IC50	=	80	uM	F	CELL-LINE	HepG2	377.234
Brc1ccc(cc1)/C(=N\[N-]C(=S)N)/C=C/c1ccc(F)cc1	IC50	=	1.22	uM	F	CELL-LINE	HepG2	377.261
Clc1ccccc1C=1Oc2c(cc(Cl)cc2C[NH+](CC)CC)C(=O)C=1	IC50	=	7.94	uM	F	CELL-LINE	HepG2	377.291
S(CCn1c(ncc1[N+](=O)[O-])C)c1oc(nn1)-c1ccc(OC)cc1O	IC50	=	11	uM	F	CELL-LINE	HepG2	377.381
S(=O)(=O)(Nc1cc2c(oc(C(OCC)=O)c2C)cc1)c1ccc(F)cc1	IC50	=	5.68	uM	F	CELL-LINE	HepG2	377.392
S(=O)(=O)(Nc1ccc(F)cc1)c1cc2c(oc(C(OCC)=O)c2C)cc1	IC50	=	7.53	uM	F	CELL-LINE	HepG2	377.392
Fc1ccc(cc1)\C=C\C(=O)c1cc(-c2cc(OC)c(OC)cc2)c(N)cc1	IC50	=	8.96	uM	F	CELL-LINE	HepG2	377.415
Fc1ccc(cc1)-c1cc(ccc1N)C(=O)\C=C\c1cc(OC)c(OC)cc1	IC50	=	3.78	uM	F	CELL-LINE	HepG2	377.415
Fc1ccc(cc1)-c1cc(ccc1N)C(=O)\C=C\c1ccc(OC)cc1OC	IC50	=	7.74	uM	F	CELL-LINE	HepG2	377.415
Fc1ccc(cc1)-c1cc(ccc1N)C(=O)\C=C\c1cc(OC)ccc1OC	IC50	=	4.01	uM	F	CELL-LINE	HepG2	377.415
Fc1ccc(cc1)-c1cc(ccc1N)C(=O)\C=C\c1cccc(OC)c1OC	IC50	=	7.37	uM	F	CELL-LINE	HepG2	377.415
O1C2=C(C([O-])=C(CC)C(=O)C2(CC)CC)C(=O)C=C1c1c2c(oc1)cccc2	GI50	=	17.72	uM	F	CELL-LINE	HepG2	377.416
O1C2=C(C([O-])=C(CC)C(=O)C2(CC)CC)C(=O)C=C1c1oc2c(c1)cccc2	GI50	=	15.08	uM	F	CELL-LINE	HepG2	377.416
O1[C@@H](C)[C@H](O)[C@@H]([NH3+])C[C@@H]1OCC#Cc1c2c([nH]c1-c1ccccc1)cccc2	IC50	=	16.2	uM	F	CELL-LINE	HepG2	377.464
O1[C@@H](C)[C@@H](O)[C@@H]([NH3+])C[C@@H]1OCC#Cc1c2c([nH]c1-c1ccccc1)cccc2	IC50	=	12.9	uM	F	CELL-LINE	HepG2	377.464
O(C)c1cc(cc(OC)c1)\C=C\1/CCC\C(=C/c2ccc(N(C)C)cc2)\C/1=O	IC50	=	11.76	uM	F	CELL-LINE	HepG2	377.484
[n+]1(cc2n(c3c(c2cc1)cccc3)CCCc1ccccc1)Cc1ccccc1	IC50	=	7.9	uM	F	CELL-LINE	HepG2	377.511
S(CCCCCC)c1cc(C)c(C(=O)CC[NH+]2CC(=O)NCC2)c(c1)C	EC50	=	48	uM	F	CELL-LINE	HepG2	377.573
Clc1cc2[nH+]c3c(cc(OC)cc3)c(NCCCc3ccccc3)c2cc1	IC50	=	3.26	uM	F	CELL-LINE	HepG2	377.895
O(C)c1ccc(N2C(=O)C3C(C[NH+](C)C34c3c(NC4=O)cccc3)C2=O)cc1	IC50	=	72.55	uM	F	CELL-LINE	HepG2	378.408
O(C)c1cc2c(NC(=O)C23[NH+](CC2C3C(=O)N(C2=O)c2ccccc2)C)cc1	IC50	=	44.17	uM	F	CELL-LINE	HepG2	378.408
O1[C@H]2[C@]34[C@@H](CC1=O)C(=C)[C@H](O)[C@@](OC3)(O)[C@@H]4[C@@]1([C@@H](C2)C(=C[C@H](O)[C@H]1O)C)C	IC50	=	4.67	uM	F	CELL-LINE	HepG2	378.421
O1[C@H]2[C@@]34[C@@H]([C@@]5([C@@H](C2)C(=CC(=O)[C@H]5O)C)C)[C@](OC3)(O)[C@H](O)[C@@H]([C@@H]4CC1=O)C	IC50	=	1.2	uM	F	CELL-LINE	HepG2	378.421
O(C)C1=C(CC(COC(=O)c2ccccc2)(C)C)C(=O)c2c(cccc2)C1=O	IC50	=	46.74	uM	F	CELL-LINE	HepG2	378.424
o1c2c(cccc2)c(C#CCO[C@@H]2O[C@@H](C)[C@@H](O)[C@@H]([NH3+])C2)c1-c1ccccc1	IC50	=	3.2	uM	F	CELL-LINE	HepG2	378.448
o1c2c(cccc2)c(C#CCO[C@@H]2O[C@@H](C)[C@H](O)[C@@H]([NH3+])C2)c1-c1ccccc1	IC50	=	7.7	uM	F	CELL-LINE	HepG2	378.448
O1c2c(OC1)cc-1c(CC[n+]3c-1cc1c(c3)c(OCCCC)c(OC)cc1)c2	IC50	=	1.81	uM	F	CELL-LINE	HepG2	378.448
S=C1OC(=NN1CNc1ccccc1OCC)c1nc2c(cc1)cccc2	IC50	=	13.7	uM	F	CELL-LINE	HepG2	378.456
s1c2c(cccc2)c(C#CCO[C@@H]2O[C@@H](C)[C@H](O)CC2)c1-c1ccccc1	IC50	=	16.4	uM	F	CELL-LINE	HepG2	378.492
s1c2c(cccc2)c(C#CCO[C@H]2O[C@@H](C)[C@H](O)CC2)c1-c1ccccc1	IC50	=	13.6	uM	F	CELL-LINE	HepG2	378.492
s1c2c(cccc2)c(C#CCO[C@@H]2O[C@@H](C)[C@@H](O)CC2)c1-c1ccccc1	IC50	=	15.6	uM	F	CELL-LINE	HepG2	378.492
s1c2c(cccc2)c(C#CCO[C@@H]2O[C@@H](C)[C@@H]([NH3+])CC2)c1-c1ccccc1	IC50	=	8.8	uM	F	CELL-LINE	HepG2	378.516
s1c2c(cccc2)c(C#CCO[C@H]2O[C@@H](C)[C@@H]([NH3+])CC2)c1-c1ccccc1	IC50	=	4.9	uM	F	CELL-LINE	HepG2	378.516
s1c2c(cccc2)c(C#CCO[C@@H]2O[C@@H](C)[C@H]([NH3+])CC2)c1-c1ccccc1	IC50	=	4.7	uM	F	CELL-LINE	HepG2	378.516
Brc1ccc(cc1)-c1[nH]c2c(n1)cc(NC(=O)CCCl)cc2	IC50	=	11.3	uM	F	CELL-LINE	HepG2	378.657
Clc1ccc(cc1)\C=C(\C(=O)NN1C(=Nc2c(cc(cc2)C)C1=O)C)/C#N	IC50	=	9	uM	F	CELL-LINE	HepG2	378.819
Clc1cc(Nc2ncnc3c2cc(NCc2ccc(F)cc2)cc3)ccc1	IC50	=	2.69	uM	F	CELL-LINE	HepG2	378.838
Clc1ccc(cc1)CSc1nnc(n1-c1ccccc1)-c1ccncc1	IC50	=	16.94	uM	F	CELL-LINE	HepG2	378.887
Clc1cc(ccc1)CSc1nnc(n1-c1ccccc1)-c1ccncc1	IC50	=	11.17	uM	F	CELL-LINE	HepG2	378.887
Clc1ccccc1CSc1nnc(n1-c1ccccc1)-c1ccncc1	IC50	=	15.7	uM	F	CELL-LINE	HepG2	378.887
Clc1ccc(cc1)C[NH+]1C[C@@H]2[C@@H]3[NH+](CCC[C@@H]3[C@H]1CCCCO)CCC2	IC50	=	9.37	uM	F	CELL-LINE	HepG2	378.988
Clc1ccsc1C(=O)N/C(/SC)=N/C(=O)c1sccc1Cl	GI50	=	65.25	uM	F	CELL-LINE	HepG2	379.312
O(C)c1cc(ccc1O)\C=C\C(=O)\C=C\c1nc2cc([N+](=O)[O-])ccc2n1C	IC50	=	3.7	uM	F	CELL-LINE	HepG2	379.372
O(C)c1ccc(cc1O)\C=C\C(=O)\C=C\c1nc2cc([N+](=O)[O-])ccc2n1C	IC50	=	4.6	uM	F	CELL-LINE	HepG2	379.372
S(=O)(=O)(N[C@H]1O[C@H](COC(=O)C)[C@@H](OC(=O)C)C=C1OC(=O)C)CC	IC50	=	14700	uM	F	CELL-LINE	HepG2	379.386
O(C)c1ccccc1C(OCC(CC1=C([O-])C(=O)c2c(cccc2)C1=O)C)=O	IC50	=	4.04	uM	F	CELL-LINE	HepG2	379.388
Oc1ccccc1C(OCC(CC1=C([O-])C(=O)c2c(cccc2)C1=O)(C)C)=O	IC50	=	5.44	uM	F	CELL-LINE	HepG2	379.388
s1nc(cc1[N-]C(=O)C(=O)c1c2c(n(c1)Cc1onc(c1)C)cccc2)C	IC50	=	1.711	uM	F	CELL-LINE	HepG2	379.42
Fc1ccc(cc1)\C=N\Nc1nc(NC2CC[NH+](CC2)C)c2c(n1)cccc2	IC50	=	1.95	uM	F	CELL-LINE	HepG2	379.463
O(C)c1ccc(cc1)Cn1c2c(c3c1c[n+](cc3)Cc1ccccc1)cccc2	IC50	=	15.9	uM	F	CELL-LINE	HepG2	379.483
O=C(Nc1cc2nc([nH]c2cc1)-c1ccc(cc1)C)C[NH+]1CC[NH+](CC1)CC	IC50	=	31.9	uM	F	CELL-LINE	HepG2	379.508
Clc1cc2[nH+]c3c(cc(OC)cc3)c(NCc3ccccc3OC)c2cc1	IC50	=	4.2	uM	F	CELL-LINE	HepG2	379.867
Clc1cc2[nH+]c3c(cc(OC)cc3)c(Nc3ccc(OCC)cc3)c2cc1	IC50	=	7.4	uM	F	CELL-LINE	HepG2	379.867
Clc1cc2[nH+]c3c(cc(OC)cc3)c(Nc3ccccc3OCC)c2cc1	IC50	=	27.9	uM	F	CELL-LINE	HepG2	379.867
Clc1cc(ccc1)CSc1nnc(n1-c1ccccc1)-c1nccnc1	IC50	=	19.62	uM	F	CELL-LINE	HepG2	379.875
Clc1ccccc1CSc1nnc(n1-c1ccccc1)-c1nccnc1	IC50	=	18.83	uM	F	CELL-LINE	HepG2	379.875
Clc1ccc(cc1)CSc1nnc(n1-c1ccccc1)-c1nccnc1	IC50	=	15.34	uM	F	CELL-LINE	HepG2	379.875
O1[C@@H]([C@H](O)[C@H](OC(=O)\C=C\c2ccccc2)c2ccccc2)[C@@H](O)C=CC1=O	IC50	=	1.6	uM	F	CELL-LINE	HepG2	380.396
S(Cc1ccc(F)cc1F)c1nnc(n1-c1ccccc1)-c1ccncc1	IC50	=	10.15	uM	F	CELL-LINE	HepG2	380.422
O1C2(C34Oc5c(C(=O)C3=CC(CC4C1(C)C)C2=O)c(O)ccc5)C\C=C(\C)/C	IC50	=	2.37	uM	F	CELL-LINE	HepG2	380.44
O1C2(C34Oc5c(cc(O)cc5)C(=O)C3=CC(CC4C1(C)C)C2=O)C\C=C(\C)/C	IC50	=	12.3	uM	F	CELL-LINE	HepG2	380.44
O1C2(C34Oc5c(ccc(O)c5)C(=O)C3=CC(CC4C1(C)C)C2=O)C\C=C(\C)/C	IC50	=	23.4	uM	F	CELL-LINE	HepG2	380.44
O1C2(C34Oc5c(cccc5O)C(=O)C3=CC(CC4C1(C)C)C2=O)C\C=C(\C)/C	IC50	=	14.3	uM	F	CELL-LINE	HepG2	380.44
O(C)c1cc(ccc1OC)\C=C\1/CC\C(=C/c2cc(OC)c(OC)cc2)\C/1=O	IC50	=	106	uM	F	CELL-LINE	HepG2	380.44
O(C)c1ccc(cc1O)\C=C\1/CCC\C(=C/c2cc(OC)cc(OC)c2)\C/1=O	IC50	=	11.05	uM	F	CELL-LINE	HepG2	380.44
O1C2([C@@]34Oc5c(C(=O)C3=C[C@H](C[C@H]4C1(C)C)C2=O)c(O)ccc5)C\C=C(\C)/C	IC50	=	0.81	uM	F	CELL-LINE	HepG2	380.44
O(C)c1cc2c3c(c4c(cc(OC)cc4)c2cc1OC)[C@@H](O)[C@H]1[NH+](CCC1)C3	GI50	=	0.02	uM	F	CELL-LINE	HepG2	380.464
s1nc(cc1[N-]C(=O)C(=O)c1c2c(n(c1)Cc1ccsc1)cccc2)C	IC50	=	2.537	uM	F	CELL-LINE	HepG2	380.472
O=C1N(CCC[NH+](C)C)C(=O)c2c3c1cc1nnn(c1c3ccc2)CCCC	IC50	=	5.77	uM	F	CELL-LINE	HepG2	380.472
s1c(cnc1N(Cc1ccc(cc1)C(=O)N[O-])CCC)-c1ccc(cc1)C	GI50	=	2.55	uM	F	CELL-LINE	HepG2	380.492
s1c(cnc1N(Cc1ccc(cc1)C(=O)N[O-])C(C)C)-c1ccc(cc1)C	GI50	=	2.18	uM	F	CELL-LINE	HepG2	380.492
O(C)c1cc2cc(c3c(cc(OC)cc3)c2cc1OC)C[NH+]1CCCC[C@@H]1C	IC50	=	8.12	uM	F	CELL-LINE	HepG2	380.508
O(C)c1cc2cc(c3c(cc(OC)cc3)c2cc1OC)C[NH+]1CCCC[C@H]1C	IC50	=	7.27	uM	F	CELL-LINE	HepG2	380.508
O(C)c1cc2c3c(CC[NH+](C3)CCCC)c3c(cc(OC)cc3)c2cc1OC	GI50	=	4.04	uM	F	CELL-LINE	HepG2	380.508
Brc1cc(ccc1)\C=C\C(=O)c1cc(ccc1)-c1cc(F)ccc1	IC50	=	6.98	uM	F	CELL-LINE	HepG2	381.244
Brc1ccccc1\C=C\C(=O)c1cc(ccc1)-c1cc(F)ccc1	IC50	=	12.83	uM	F	CELL-LINE	HepG2	381.244
Brc1ccc(cc1)\C=C\C(=O)c1cc(ccc1)-c1cc(F)ccc1	IC50	=	9.92	uM	F	CELL-LINE	HepG2	381.244
S(=O)(=O)(N)c1ccc(-n2nc(cc2-c2ccc(cc2)C)C(F)(F)F)cc1	IC50	=	95.5	uM	F	CELL-LINE	HepG2	381.378
O1c2cc(N3C(=CC=CC3=O)c3cc(OC)c(OC)c(OC)c3)ccc2OC1	IC50	=	5.414	uM	F	CELL-LINE	HepG2	381.384
O(C)c1ccc(cc1)CN1c2c(cc(cc2)\C=C\C(OCCO)=O)C(=O)C1=O	IC50	=	0.86	uM	F	CELL-LINE	HepG2	381.384
Fc1cc(ccc1F)-c1cc2c3c(cccc3c1)C(=O)N(CC[NH+](C)C)C2=O	IC50	=	5.54	uM	F	CELL-LINE	HepG2	381.402
O1C2=C(C([O-])=C(CC)C(=O)C2(CC)CC)C(=O)C=C1c1cc2OCOc2cc1	GI50	=	11.78	uM	F	CELL-LINE	HepG2	381.404
Fc1cc2c(NC(=O)C2(c2c3c([nH]c2)cccc3)c2c3c([nH]c2)cccc3)cc1	IC50	=	6.6	uM	F	CELL-LINE	HepG2	381.41
S(Cc1c(F)cccc1F)c1nnc(n1-c1ccccc1)-c1nccnc1	IC50	=	22.57	uM	F	CELL-LINE	HepG2	381.41
S(Cc1ccc(F)cc1F)c1nnc(n1-c1ccccc1)-c1nccnc1	IC50	=	10.41	uM	F	CELL-LINE	HepG2	381.41
S(CCn1c(ncc1[N+](=O)[O-])C)c1oc(nn1)-c1cc2c(cc1)cccc2	IC50	=	10.1	uM	F	CELL-LINE	HepG2	381.416
S(CCn1c(ncc1[N+](=O)[O-])C)c1oc(nn1)-c1c2c(ccc1)cccc2	IC50	=	10.6	uM	F	CELL-LINE	HepG2	381.416
O(C)c1cc2c3c(c4c(cc(OC)cc4)c2cc1O)[C@H](O)[C@H]1[N+]([O-])(CCC1)C3	GI50	=	0.098	uM	F	CELL-LINE	HepG2	381.428
O(C)c1c(OC)cc(N2C(=CC=CC2=O)c2cc(C)c(OC)cc2)cc1OC	IC50	=	0.129	uM	F	CELL-LINE	HepG2	381.428
O1c2c(cccc2C[NH+]2CC[NH+](CC2)C)C(=O)C=C1c1ccc([N+](=O)[O-])cc1	IC50	=	2.94	uM	F	CELL-LINE	HepG2	381.432
o1c(nnc1CCc1c2c([nH]c1)cccc2)-c1ccc(Oc2ccccc2)cc1	IC50	=	40	uM	F	CELL-LINE	HepG2	381.435
S=C(N1C[C@@]2([C@@H](CC1)[C@H](C)[C@@H](O)CC2)C)CCCCCCCCCCC	IC50	=	2	uM	F	CELL-LINE	HepG2	381.669
[se]1cc(nc1N\N=C\c1nc(sc1)-c1ccccc1)CCl	IC50	=	18.76	uM	F	CELL-LINE	HepG2	381.752
Clc1cc(c2OC(=CC(=O)c2c1)c1ccc([N+](=O)[O-])cc1)Cn1ccnc1	IC50	=	2.94	uM	F	CELL-LINE	HepG2	381.775
Clc1ccc(Nc2oc(nn2)-c2cccnc2Nc2ccc(F)cc2)cc1	GI50	=	53.4	uM	F	CELL-LINE	HepG2	381.798
O(C)c1c(OC)cc(cc1OC)C=1N(C(=O)C=CC=1)c1ccc([N+](=O)[O-])cc1	IC50	=	0.941	uM	F	CELL-LINE	HepG2	382.372
O1c2c(c(O)c(OC)c(OCC[NH+]3CCCC3)c2)C(=O)C=C1c1ccccc1	IC50	=	9.7	uM	F	CELL-LINE	HepG2	382.436
O=C(N[O-])c1ccccc1NC(=O)CCCCCCC(=O)Nc1ccccc1	IC50	=	63.48	uM	F	CELL-LINE	HepG2	382.44
O=C1NC(=CC=C1C(=O)NCC[NH+](CC)CC)\C=C/1\c2ncccc2NC\1=O	IC50	=	12.6	uM	F	CELL-LINE	HepG2	382.444
O=C1N(CC[NH+](C)C)C(=O)c2c3c1cc1nnn(c1c3ccc2)CC[NH+](C)C	IC50	=	0.17	uM	F	CELL-LINE	HepG2	382.468
O(C)c1cc2c3c(c4c(cc(OC)cc4)c2cc1OC)C(O)C[NH+](C3)CCC	GI50	=	0.11	uM	F	CELL-LINE	HepG2	382.48
O(C)c1cc2c3CC[NH+](Cc3c3cc(OC)c(OC)cc3c2cc1OC)CC	GI50	=	1	uM	F	CELL-LINE	HepG2	382.48
[NH+]1(CCCC1)Cc1ccc(cc1)-c1nccc(c1)-c1c[nH]nc1-c1ncccc1	IC50	=	0.118	uM	F	CELL-LINE	HepG2	382.491
O(C)c1ccc(cc1)C(c1c2c(ccc1O)cccc2)c1ccc(cc1)C(C)C	IC50	=	44	uM	F	CELL-LINE	HepG2	382.503
Oc1ccc(cc1C[NH+](C)C)\C=C\C(=O)\C=C\c1cc(C[NH+](C)C)c(O)cc1	IC50	=	133.1	uM	F	CELL-LINE	HepG2	382.504
O1[C@]2([C@@H]3CC=C([C@@H]4[C@H](C[C@]3(CC2)C)C(=CC4=O)C)C=O)[C@H](C[C@@H]1\C=C(\C)/C)C	IC50	=	55.7	uM	F	CELL-LINE	HepG2	382.544
O1[C@]2([C@@H]3CC=C([C@H]4[C@H](C[C@]3(CC2)C)C(=CC4=O)C)C=O)[C@H](C[C@@H]1\C=C(\C)/C)C	IC50	=	47.1	uM	F	CELL-LINE	HepG2	382.544
s1c2c(cccc2)c(CCCO[C@@H]2O[C@@H](C)[C@@H]([NH3+])CC2)c1-c1ccccc1	IC50	=	7.5	uM	F	CELL-LINE	HepG2	382.548
[NH+](CCCC[NH2+]Cc1ncc2n(c3c(c2c1)cccc3)CCCC)(CC)CC	IC50	=	8	uM	F	CELL-LINE	HepG2	382.596
[NH+](CCCC[NH2+]Cc1nccc2c1n(c1c2cccc1)CCCC)(CC)CC	IC50	=	20.4	uM	F	CELL-LINE	HepG2	382.596
[NH+](CCCC[NH2+]Cc1nccc2c1n(c1c2cccc1)CC(C)C)(CC)CC	IC50	=	27.2	uM	F	CELL-LINE	HepG2	382.596
Clc1cc(NC(=O)C=2C(c3c(n[nH]c3)NC=2C)c2ccccc2)ccc1F	IC50	=	42.38	uM	F	CELL-LINE	HepG2	382.826
Clc1cc2c(NC(=O)C23[NH+](CC2C3C(=O)N(C2=O)c2ccccc2)C)cc1	IC50	=	33.05	uM	F	CELL-LINE	HepG2	382.827
Clc1ccc(N2C(=O)C3C(C[NH+](C)C34c3c(NC4=O)cccc3)C2=O)cc1	IC50	=	32.42	uM	F	CELL-LINE	HepG2	382.827
Fc1c(F)cc(Nc2ncccc2-c2oc(nn2)Nc2ccccc2)cc1F	GI50	=	11.16	uM	F	CELL-LINE	HepG2	383.333
O(C)c1c(OC)cc(cc1OC)C=1N(C(=O)C=CC=1)c1cc(O)c(OC)cc1	IC50	=	1.223	uM	F	CELL-LINE	HepG2	383.4
O1[C@@H]2O[C@@]3(OO[C@]24[C@@H](CC[C@H]([C@@H]4CC3)C)[C@@H](C)[C@@H]1OC(=O)CCC(=O)[O-])C	IC50	=	20	uM	F	CELL-LINE	HepG2	383.417
S(=O)(=O)(N[C@H]1O[C@H](COC(=O)C)[C@H](OC(=O)C)C=C1)c1ccc(cc1)C	IC50	=	306700	uM	F	CELL-LINE	HepG2	383.421
S(=O)(=O)(N[C@H]1O[C@H](COC(=O)C)[C@@H](OC(=O)C)C=C1)c1ccc(cc1)C	IC50	=	156500	uM	F	CELL-LINE	HepG2	383.421
O=C/1Nc2c(c[nH+]cc2)\C\1=C\c1[nH]c(C)c(C(=O)NCC[NH+](CC)CC)c1C	IC50	=	16.4	uM	F	CELL-LINE	HepG2	383.496
S(CC)[C@H]1[C@@H](SCC)[C@@H](O[C@@H]1CO)n1nnc(c1)-c1ccc(F)cc1	EC50	=	9.62	uM	F	CELL-LINE	HepG2	383.512
Clc1cc(ccc1)Cn1c2c(c3c1c[n+](cc3)Cc1ccccc1)cccc2	IC50	=	16.5	uM	F	CELL-LINE	HepG2	383.902
Clc1ccc(cc1)\C=N\Nc1nc(NCCC[NH+](C)C)c2c(n1)cccc2	IC50	=	0.55	uM	F	CELL-LINE	HepG2	383.907
Clc1cc(SCCCCCC)ccc1C(=O)CC[NH+]1CC(=O)NCC1	EC50	=	47	uM	F	CELL-LINE	HepG2	383.964
OB(O)[C@@H](NC(=O)[C@@H](NC(=O)c1nccnc1)Cc1ccccc1)CC(C)C	IC50	=	0.0375	uM	F	CELL-LINE	HepG2	384.244
O(N=[N+]([O-])N1CCN(CC1)C(OCC)=O)c1ccc([N+](=O)[O-])cc1[N+](=O)[O-]	IC50	=	5.19	uM	F	CELL-LINE	HepG2	384.305
S(CC(=O)N\N=C\c1ccccc1[N+](=O)[O-])c1oc(nn1)-c1ccncc1	IC50	=	24.7	uM	F	CELL-LINE	HepG2	384.376
S(CC(=O)N\N=C\c1ccc([N+](=O)[O-])cc1)c1oc(nn1)-c1ccncc1	IC50	=	17.86	uM	F	CELL-LINE	HepG2	384.376
O1C[C@@H](Cc2cc3OCOc3cc2)[C@H](Cc2cc(OC)c3OCOc3c2)C1=O	IC50	=	26.4	uM	F	CELL-LINE	HepG2	384.384
S1c2c(N3C1=NC1=C(C3c3occc3)C(=O)c3c(cccc3)C1=O)cccc2	IC50	=	9.07	uM	F	CELL-LINE	HepG2	384.415
O=C(Nc1cn(nc1)Cc1ccc(N=[N+]=[N-])cc1)CCCCCCC(=O)N[O-]	EC50	=	5.9	uM	F	CELL-LINE	HepG2	384.42
O(C)c1c2c(C(=O)C(=CC2=O)[C@@H](OC(=O)\C=C(\C)/C)C\C=C(\C)/C)c(O)cc1	IC50	=	0.97	uM	F	CELL-LINE	HepG2	384.428
O=C1c2c(cccc2)C(=O)C=C1CC(COC(=O)c1cc2c(cc1)cccc2)C	IC50	=	27.3	uM	F	CELL-LINE	HepG2	384.431
O1c2c(c(O)c(OC)c(OCC[NH+](CC)CC)c2)C(=O)C=C1c1ccccc1	IC50	=	12	uM	F	CELL-LINE	HepG2	384.452
O1C=C(C=CC1=O)[C@H]1C[C@H]2O[C@]23[C@H]2[C@H](CC[C@]13C)[C@@]1([C@@H](C[C@@H](O)CC1)CC2)C	IC50	=	43.3	uM	F	CELL-LINE	HepG2	384.516
o1c(ccc1\C=C\C(=O)N[O-])C[NH+](Cc1ccccc1)CCCCCCCC	EC50	=	3.96	uM	F	CELL-LINE	HepG2	384.52
O(C\C=C(\C)/C)c1cc2n(c3c(c2cc1)ccnc3C)CCCc1ccccc1	IC50	=	21.1	uM	F	CELL-LINE	HepG2	384.523
Clc1cc(Cl)ccc1-c1nc(ncc1)Nc1ccc(Cl)cc1Cl	IC50	=	8.08	uM	F	CELL-LINE	HepG2	385.081
Clc1cc(Cl)ccc1Nc1nc(ccn1)-c1cc(Cl)c(Cl)cc1	IC50	=	28.45	uM	F	CELL-LINE	HepG2	385.081
O1N=C([C@H]([C@@]12c1cc([N+](=O)[O-])ccc1NC2=O)c1ccccc1)c1ccccc1	GI50	=	83.59	uM	F	CELL-LINE	HepG2	385.379
O1N=C([C@H]([C@@]12c1c(NC2=O)cccc1)c1ccccc1)c1ccc([N+](=O)[O-])cc1	GI50	=	52.14	uM	F	CELL-LINE	HepG2	385.379
O=C1C(CCCOC(=O)c2cc3c(cc2)cccc3)=C([O-])c2c(cccc2)C1=O	IC50	=	15.54	uM	F	CELL-LINE	HepG2	385.395
S(CC(=O)N\N=C\c1cc(OC)c(O)cc1)c1oc(nn1)-c1ccncc1	IC50	=	2.92	uM	F	CELL-LINE	HepG2	385.404
O(C)c1c(OC)c2n(C)c(C)c(c2cc1OC)C(=O)c1cc(O)c(OC)cc1	IC50	=	0.09163	uM	F	CELL-LINE	HepG2	385.416
S1CC(=O)N=C1N1N=C(CC1c1cc2c(cc1)cccc2)c1ccc(cc1)C	IC50	=	12.69	uM	F	CELL-LINE	HepG2	385.491
S1CC(=O)N=C1N1N=C(CC1c1c2c(ccc1)cccc2)c1ccc(cc1)C	IC50	=	8.66	uM	F	CELL-LINE	HepG2	385.491
P(OCOC(OCC=C)=O)(=O)([O-])COCCn1c2ncnc(N)c2nc1	IC50	=	23.7	uM	F	CELL-LINE	HepG2	386.281
o1ncc(c1-c1cc(OC)c(OC)c(OC)c1)-c1cc([N+](=O)[O-])c(OC)cc1	IC50	=	0.0137	uM	F	CELL-LINE	HepG2	386.36
S(\C(=N/C(=O)c1cc2OCOc2cc1)\NC(=O)c1cc2OCOc2cc1)C	GI50	=	61.42	uM	F	CELL-LINE	HepG2	386.384
O1C[C@@H](Cc2cc(OC)c3OCOc3c2)[C@H](Cc2cc(OC)c(O)cc2)C1=O	IC50	=	200.5	uM	F	CELL-LINE	HepG2	386.4
O1[C@]23[C@@H]([C@](C)(C(=O)C=C2)C1=O)[C@@H]([C@]12[C@H]3CC[C@](OC)(C1)C(=C)C2=O)C(OC)=O	IC50	=	43.5	uM	F	CELL-LINE	HepG2	386.4
o1c(ccc1\C=C\C(=O)N[O-])C[NH+](CCc1cc2OCOc2cc1)CC(C)C	EC50	=	38.01	uM	F	CELL-LINE	HepG2	386.448
o1c(ccc1\C=C\C(=O)N[O-])C[NH+](CCc1cc2OCOc2cc1)CCCC	EC50	=	54.33	uM	F	CELL-LINE	HepG2	386.448
O=C1c2cc(NC(=O)CC[NH+]3CCCCC3)ccc2-c2nccc3c2c1ccc3	IC50	=	6.36	uM	F	CELL-LINE	HepG2	386.475
O=C1c2cc(NC(=O)CCC[NH+]3CCCC3)ccc2-c2nccc3c2c1ccc3	IC50	=	12.94	uM	F	CELL-LINE	HepG2	386.475
OC[C@H](NC1=[NH+]c2n(ncc2C(C)C)C(NCc2ccccc2)=C1)[C@H](O)CO	GI50	=	1	uM	F	CELL-LINE	HepG2	386.476
O(CC[NH+](C)C)c1ccc(cc1)-c1nccc(c1)-c1c[nH]nc1-c1ncccc1	IC50	=	0.014	uM	F	CELL-LINE	HepG2	386.479
S=C(N)[N-]\N=C(\C=C\c1ccc(OCc2ccccc2)cc1)/c1ccccc1	IC50	=	0.85	uM	F	CELL-LINE	HepG2	386.499
O1C=C(C=CC1=O)[C@H]1CC[C@]2(O)[C@H]3[C@H](CC[C@]12C)[C@@]1([C@@H](C[C@@H](O)CC1)CC3)C	IC50	=	0.64	uM	F	CELL-LINE	HepG2	386.532
O(C(CC)CC)c1cc2n(c3c(c2cc1)ccnc3C)CCCc1ccccc1	IC50	=	7.3	uM	F	CELL-LINE	HepG2	386.539
O[C@@H]1C[C@]2([C@H]3[C@]4([C@@]5(C(CC3)C(=C)[C@@H]([NH+](C)C)CC5)C4)CC[C@]2(C)[C@H]1C(=O)C)C	IC50	=	57.13	uM	F	CELL-LINE	HepG2	386.6
O1C2=C(C([O-])=C(CC)C(=O)C2(CC)CC)C(=O)C=C1c1c2c(ccc1)cccc2	GI50	=	2.06	uM	F	CELL-LINE	HepG2	387.455
O1C2=C(C([O-])=C(CC)C(=O)C2(CC)CC)C(=O)C=C1c1cc2c(cc1)cccc2	GI50	=	1.55	uM	F	CELL-LINE	HepG2	387.455
S(CCn1c(ncc1[N+](=O)[O-])C)c1oc(nn1)-c1ccc(cc1)C(C)(C)C	IC50	=	4	uM	F	CELL-LINE	HepG2	387.464
O1c2c(C=CC1(C)C)c(OCC)ccc2C(=O)\C=C\c1cc2c(n(cc2)C)cc1	IC50	=	0.75	uM	F	CELL-LINE	HepG2	387.479
O1c2c(C=CC1(C)C)c(OC)ccc2C(=O)\C=C\c1c2c(n(c1)CC)cccc2	IC50	=	3.01	uM	F	CELL-LINE	HepG2	387.479
O1c2c(C=CC1(C)C)c(OC)ccc2C(=O)\C=C\c1c2c(n(cc2)CC)ccc1	IC50	=	5.54	uM	F	CELL-LINE	HepG2	387.479
s1c2cc(NC(=O)c3ccccc3OC)ccc2nc1SCC(=O)NC	IC50	=	18.5	uM	F	CELL-LINE	HepG2	387.484
Clc1cc(c2OC(=CC(=O)c2c1)c1ccc([N+](=O)[O-])cc1)C[NH+](CC)CC	IC50	=	1.19	uM	F	CELL-LINE	HepG2	387.843
Clc1cc(F)ccc1\C=N\Nc1nc(NCC[NH+](C)C)c2c(n1)cccc2	IC50	=	0.68	uM	F	CELL-LINE	HepG2	387.87
Fc1ccccc1Cn1nc2c(cccc2C(F)(F)F)c1-c1ccc(F)cc1	EC50	=	1.222	uM	F	CELL-LINE	HepG2	388.339
O1c2c(C(=O)C=C1c1cc(OC)c(OC)c(OC)c1)c(O)cc(OC)c2OC	IC50	=	25	uM	F	CELL-LINE	HepG2	388.372
O1c2c(C(=O)C(OC)=C1c1ccc(OC)cc1)c(O)c(OC)c(OC)c2OC	IC50	=	35	uM	F	CELL-LINE	HepG2	388.372
O1c2c3c4c(CC[n+]5c4c(c4c(c5)c(OC(=O)C)c(OC)cc4)cc3)cc2OC1	IC50	=	0.19	uM	F	CELL-LINE	HepG2	388.399
Fc1ccc(NC(=O)C=2C(n3c4c(nc3NC=2C)cccc4)c2occc2)cc1	IC50	=	7.38	uM	F	CELL-LINE	HepG2	388.402
O(C)c1c(OC)cc(cc1OC)C1CC(=O)c2c1c(OC)c(OC)c(OC)c2	IC50	=	9	uM	F	CELL-LINE	HepG2	388.416
O(C)c1c(OC)c2c(cc1OC)C(=O)CC2c1c(OC)cc(OC)cc1OC	IC50	=	1.49	uM	F	CELL-LINE	HepG2	388.416
Oc1c2c(C(=O)C=C([C@H](OC(=O)CC(O)(C)C)C\C=C(\C)/C)C2=O)c(O)cc1	IC50	=	0.59	uM	F	CELL-LINE	HepG2	388.416
O(C)c1c(OC)cc(cc1OC)C(=O)\C=C\c1cc(OC)c(OC)cc1OC	IC50	=	16.1	uM	F	CELL-LINE	HepG2	388.416
O(C)c1c(OC)cc(cc1OC)C(=O)\C=C\c1cc(OC)c(OC)c(OC)c1	IC50	=	19.6	uM	F	CELL-LINE	HepG2	388.416
O(C)c1cc(ccc1O[C@@H]([C@H](OC)c1cc(OC)c(O)cc1)CO)\C=C\C=O	IC50	=	39.97	uM	F	CELL-LINE	HepG2	388.416
O=C(N1Cc2c(n(nc2NC(=O)c2ccccc2)C(=O)CC)C1)c1ccccc1	IC50	=	0.86	uM	F	CELL-LINE	HepG2	388.427
O1C2=C(C([O-])=C(CC)C(=O)C2(CC)CC)C(=O)C=C1c1cc2c(nc1)cccc2	GI50	=	14.91	uM	F	CELL-LINE	HepG2	388.443
S1C=C(N(c2cc(OC)c(OC)c(OC)c2)C1=O)c1cc(N)c(OC)cc1	IC50	=	4.5	uM	F	CELL-LINE	HepG2	388.444
S(C)c1ccc(cc1)COCC#CC(O)c1cc(OC)c(OC)c(OC)c1	GI50	=	100	uM	F	CELL-LINE	HepG2	388.484
O1[C@]23[C@@H](CC[C@@](O)(C2)C(=C)C1=O)[C@]1([C@@H](CC3)[C@](CCC1)(C(OCC=C)=O)C)C	IC50	=	67.21	uM	F	CELL-LINE	HepG2	388.504
O1[C@@]2(CC[C@H]3[C@](C2)(CC[C@@H]2[C@@](CCC[C@@]23C)(C(OCCC)=O)C)C(=C)C1=O)C	IC50	=	12.39	uM	F	CELL-LINE	HepG2	388.548
[NH+](CC[NH2+]Cc1ncc2n(c3c(c2c1)cccc3)Cc1ccccc1)(CC)CC	IC50	=	13.1	uM	F	CELL-LINE	HepG2	388.559
[NH+](CC[NH2+]Cc1nccc2c1n(c1c2cccc1)Cc1ccccc1)(CC)CC	IC50	=	59.5	uM	F	CELL-LINE	HepG2	388.559
Clc1cc2NC(=O)[C@@]3(ON=C([C@H]3c3ccccc3)c3ccc(cc3)C)c2cc1	GI50	=	29.1	uM	F	CELL-LINE	HepG2	388.854
Brc1ccc(cc1)C(=O)COc1cc2OC(=O)C=Cc2cc1OC	IC50	=	90.4	uM	F	CELL-LINE	HepG2	389.201
Clc1ccccc1C=1Oc2c(cc(Cl)cc2C[NH+]2CCCCC2)C(=O)C=1	IC50	=	10.7	uM	F	CELL-LINE	HepG2	389.302
FC(F)(F)c1ccc(cc1)CN1c2c(cc(cc2)\C=C\C(OC)=O)C(=O)C1=O	IC50	=	0.07	uM	F	CELL-LINE	HepG2	389.329
Clc1cc(OCCCCCC)cc(Cl)c1C(=O)CC[NH+]1CCOCC1	EC50	=	17	uM	F	CELL-LINE	HepG2	389.343
Clc1c(Cl)c(OCCCCCC)ccc1C(=O)CC[NH+]1CCOCC1	EC50	=	25	uM	F	CELL-LINE	HepG2	389.343
Clc1cc(OCCCCCC)c(Cl)cc1C(=O)CC[NH+]1CCOCC1	EC50	=	28	uM	F	CELL-LINE	HepG2	389.343
[se]1c(C(=O)C)c(nc1N\N=C\c1nc(sc1)-c1ccccc1)C	IC50	=	61.31	uM	F	CELL-LINE	HepG2	389.344
O=C1N(NC(=O)\C(=C\c2ccc([N+](=O)[O-])cc2)\C#N)C(=Nc2c1cc(cc2)C)C	IC50	=	10	uM	F	CELL-LINE	HepG2	389.371
S(CCn1c(ncc1[N+](=O)[O-])C)c1oc(nn1)-c1cc2OCCOc2cc1	IC50	=	4.1	uM	F	CELL-LINE	HepG2	389.392
S(=O)(=O)(N1N=C(CC1c1ccccc1O)C)CCc1ccc([N+](=O)[O-])cc1	IC50	=	83.04	uM	F	CELL-LINE	HepG2	389.432
S(Cc1cc([N+](=O)[O-])ccc1)c1nnc(n1-c1ccccc1)-c1ccncc1	IC50	=	21.96	uM	F	CELL-LINE	HepG2	389.439
S1CC(=O)N=C1N1N=C(CC1c1c2c(ccc1)cccc2)c1ccc(F)cc1	IC50	=	19.52	uM	F	CELL-LINE	HepG2	389.454
S1CC(=O)N=C1N1N=C(CC1c1cc2c(cc1)cccc2)c1ccc(F)cc1	IC50	=	24.12	uM	F	CELL-LINE	HepG2	389.454
O1C2=C(C([O-])=C(CC)C(=O)C2(CC)CC)C(=O)CC1c1c2c(ccc1)cccc2	GI50	=	9.02	uM	F	CELL-LINE	HepG2	389.471
O1c2c(C=CC1(C)C)c(OC)ccc2C(=O)\C=C\c1ccc(N2CCCC2)cc1	IC50	=	4.74	uM	F	CELL-LINE	HepG2	389.495
O(CC[NH+](C)C)c1ccc2[C@@H]3[C@H]([C@@H]4CC[C@H](O)[C@]4(CC3)C)CCc2c1[N+](=O)[O-]	IC50	=	4.9	uM	F	CELL-LINE	HepG2	389.516
O(CC[NH+](C)C)c1cc2CC[C@H]3[C@@H]4CC[C@H](O)[C@]4(CC[C@@H]3c2cc1[N+](=O)[O-])C	IC50	=	8.2	uM	F	CELL-LINE	HepG2	389.516
O(CCCCCC)c1cc(C)c(C(=O)CC[NH+]2CCN(CC2)C(=O)C)c(c1)C	EC50	=	34	uM	F	CELL-LINE	HepG2	389.56
Clc1cc(\C=N\NC(=O)CSc2oc(nn2)-c2ccncc2)c(O)cc1	IC50	=	3.97	uM	F	CELL-LINE	HepG2	389.823
Clc1cc(ccc1Cl)CN1c2c(cc(cc2)\C=C\C(OC)=O)C(=O)C1=O	IC50	=	0.16	uM	F	CELL-LINE	HepG2	390.222
O=C1N(CC[NH+](C)C)C(=O)c2c3c1cc(cc3ccc2)-c1cc([N+](=O)[O-])ccc1	IC50	=	4.72	uM	F	CELL-LINE	HepG2	390.419
O(C)c1c(OC)cc(cc1OC)C1CC(O)c2c1c(OC)c(OC)c(OC)c2	IC50	=	102.5	uM	F	CELL-LINE	HepG2	390.432
O(C)c1ccc(cc1)CN1c2c(cc(cc2)\C=C\C(=O)N2CCCC2)C(=O)C1=O	IC50	=	7.81	uM	F	CELL-LINE	HepG2	390.439
O1C2=C(C([O-])=C(CC)C(=O)C2(CC)CC)C(=O)C=C1c1c2c(n(c1)C)cccc2	GI50	=	21.74	uM	F	CELL-LINE	HepG2	390.459
O1c2c(OC1)cc-1c(CC[n+]3c-1cc1c(c3)c(OC\C=C(\C)/C)c(OC)cc1)c2	IC50	=	4.67	uM	F	CELL-LINE	HepG2	390.459
O(C)c1ccc(Nc2cc3c4c(cccc4c2)C(=O)N(CC[NH+](C)C)C3=O)cc1	IC50	=	0.9	uM	F	CELL-LINE	HepG2	390.463
O(C)c1c(OC)cc(cc1OC)-c1nccc2c1n(c1c2cccc1)CCCC	IC50	=	51.9	uM	F	CELL-LINE	HepG2	390.483
o1c(ccc1\C=C\C(=O)N[O-])C[NH+](Cc1ccc(cc1)-c1ccccc1)C(C)C	EC50	=	15.51	uM	F	CELL-LINE	HepG2	390.483
O=C1c2cc(NC(=O)CC[NH2+]CC[NH+](C)C)ccc2-c2nccc3c2c1ccc3	IC50	=	21.02	uM	F	CELL-LINE	HepG2	390.487
o1c2c(cccc2)c(C#CCO[C@@H]2O[C@@H](C)[C@@H]([NH2+]CC)CC2)c1-c1ccccc1	IC50	=	6	uM	F	CELL-LINE	HepG2	390.503
o1c2c(cccc2)c(C#CCO[C@@H]2O[C@@H](C)[C@@H]([NH+](C)C)CC2)c1-c1ccccc1	IC50	=	6.8	uM	F	CELL-LINE	HepG2	390.503
O1CC(=CC1=O)[C@H]1CC[C@]2(O)[C@H]3[C@H](CC[C@]12C)[C@@]1([C@H](C[C@@H](O)CC1)CC3)CO	IC50	=	6.7	uM	F	CELL-LINE	HepG2	390.52
O1[C@@]23[C@H](CC[C@](O)(C2)C(=C)C1=O)[C@@]1([C@H](CC3)[C@@](CCC1)(C(OCCC)=O)C)C	IC50	=	67.21	uM	F	CELL-LINE	HepG2	390.52
Cl[C@@]12CC[C@@H]3[C@](C1)([C@H]([C@H]1[C@]34OC(=O)[C@@]1(C)C(=O)C=C4)C(OC)=O)C(=O)C2=C	IC50	=	39.8	uM	F	CELL-LINE	HepG2	390.819
Clc1cc(Nc2ncnc3c2cc(NCc2ccccc2OC)cc3)ccc1	IC50	=	9.85	uM	F	CELL-LINE	HepG2	390.874
Clc1cc(Nc2ncnc3c2cc(NCc2ccc(OC)cc2)cc3)ccc1	IC50	=	5.26	uM	F	CELL-LINE	HepG2	390.874
Ic1c2c(ncnc2C)n(c1)[C@@H]1O[C@H](CO)[C@@H](O)[C@H]1O	IC50	=	3.46	uM	F	CELL-LINE	HepG2	391.165
Clc1ccccc1C=1Oc2c(cc(Cl)cc2C[NH+]2CCOCC2)C(=O)C=1	IC50	=	6.81	uM	F	CELL-LINE	HepG2	391.274
Clc1cc(c2OC(=CC(=O)c2c1)c1ccc(Cl)cc1)C[NH+]1CCOCC1	IC50	=	6.33	uM	F	CELL-LINE	HepG2	391.274
Clc1ccccc1C=1Oc2c(cc(Cl)cc2C[NH+]2CC[NH2+]CC2)C(=O)C=1	IC50	=	18.7	uM	F	CELL-LINE	HepG2	391.298
S(CCn1c(ncc1[N+](=O)[O-])C)c1oc(nn1)-c1cc(OC)cc(OC)c1	IC50	=	10.5	uM	F	CELL-LINE	HepG2	391.408
O=C1NC(=O)N(C=C1C#CCCCC)C\C=C\CN1C(=O)c2c(cccc2)C1=O	IC50	=	7.9	uM	F	CELL-LINE	HepG2	391.427
O=C1NC(=O)N(C=C1C#CCCCC)C\C=C/CN1C(=O)c2c(cccc2)C1=O	IC50	=	17	uM	F	CELL-LINE	HepG2	391.427
S1C2(N(N=C1NC(=O)C)C(=O)C)CC(Oc1c2cc(OC(=O)C)cc1)(C)C	IC50	=	30	uM	F	CELL-LINE	HepG2	391.448
Fc1ccc(cc1)Cn1nc(cc1C(=O)NN)-c1c2c(n(c1)CCC)cccc2	IC50	=	1.65	uM	F	CELL-LINE	HepG2	391.45
Fc1ccc(cc1)Cn1nc(cc1-c1c2c(n(c1)CCC)cccc2)C(=O)NN	IC50	=	50.53	uM	F	CELL-LINE	HepG2	391.45
Fc1ccc(cc1)Cn1cc(c2c1cccc2)-c1n(nc(c1)C(=O)NN)CCC	IC50	=	106.8	uM	F	CELL-LINE	HepG2	391.45
Fc1ccc(cc1)Cn1cc(c2c1cccc2)-c1nn(CCC)c(c1)C(=O)NN	IC50	=	2.41	uM	F	CELL-LINE	HepG2	391.45
s1c2CCCCc2c2c1N=C(N(C1=CONC1=O)C2=O)\C=C\c1ccccc1	IC50	=	6.86	uM	F	CELL-LINE	HepG2	391.451
O=C1Nc2c(cccc2)C1(c1c2c(n(c1)C)cccc2)c1c2c(n(c1)C)cccc2	IC50	=	12	uM	F	CELL-LINE	HepG2	391.474
O(C)c1nc2c(nc1NC(=O)N1CCN(CC1)c1cc(cc(c1)C)C)cccc2	IC50	=	0.06	uM	F	CELL-LINE	HepG2	391.475
O(C)c1ccc(cc1)\C=C\c1[n+](ccc2c1[nH]c1c2cccc1)Cc1ccccc1	IC50	=	9.6	uM	F	CELL-LINE	HepG2	391.494
O1c2c(C=CC1(C)C)c(OC)ccc2C(=O)\C=C\c1ccc(N(CC)CC)cc1	IC50	=	0.59	uM	F	CELL-LINE	HepG2	391.511
[n+]1(ccc2c(n(c3c2cccc3)CCCc2ccccc2)c1C)Cc1ccccc1	IC50	=	5.8	uM	F	CELL-LINE	HepG2	391.538
[n+]1(cc2n(c3c(c2cc1)cccc3)CCCc1ccccc1)CCc1ccccc1	IC50	=	14	uM	F	CELL-LINE	HepG2	391.538
Clc1cc2c3c([nH]c2cc1)C(N(CC3)C(=O)CCC)c1c2c([nH]c1)cccc2	IC50	=	7.64	uM	F	CELL-LINE	HepG2	391.902
Clc1ccc(cc1)C(=O)Nc1cc2sc(SCC(=O)NC)nc2cc1	IC50	=	15.3	uM	F	CELL-LINE	HepG2	391.903
Ic1c2c(ncnc2N)n(c1)[C@@H]1O[C@H](CO)[C@@H](O)[C@@H]1O	IC50	=	6.12	uM	F	CELL-LINE	HepG2	392.153
O1c2c(C(=O)c3c1c(OC)c(OC)cc3)c(OC)cc(OC)c2-c1ccccc1	IC50	=	19.18	uM	F	CELL-LINE	HepG2	392.407
O(C)c1cc2c(NC(=O)C23[NH+](CC2C3C(=O)N(C2=O)c2ccc(cc2)C)C)cc1	IC50	=	12.16	uM	F	CELL-LINE	HepG2	392.435
o1c(ccc1\C=C\C(=O)N[O-])C[NH+](Cc1ccc(cc1)-c1ccccc1)CCO	EC50	=	22.56	uM	F	CELL-LINE	HepG2	392.455
o1c(ccc1\C=C\C(=O)N[O-])C[NH+](Cc1ccccc1)CCOc1ccccc1	EC50	=	44.72	uM	F	CELL-LINE	HepG2	392.455
O=C1[C@@]23[C@@H](C[C@H](O)[C@H]([C@H]2O)C1=C)[C@]1([C@H](C[C@H]3O)[C@](CCC1)(COC(=O)C)C)C	IC50	=	24.91	uM	F	CELL-LINE	HepG2	392.492
O1[C@@]23[C@H](CC[C@](O)(C2)C(=C)C1=O)[C@@]1([C@H](CC3)[C@@](CCC1)(C(OCOC)=O)C)C	IC50	=	0.38	uM	F	CELL-LINE	HepG2	392.492
Fc1ccc(cc1)Cn1c2c(c3c1cccc3)ccnc2C[NH2+]CCC[NH+](C)C	IC50	=	20	uM	F	CELL-LINE	HepG2	392.522
s1c2c(cccc2)c(C#CCO[C@@H]2O[C@@H](C)[C@@H]([NH2+]C)CC2)c1-c1ccccc1	IC50	=	8.8	uM	F	CELL-LINE	HepG2	392.543
Clc1cc2[nH+]c3c(cc(OC)cc3)c(Nc3cc(NC(=O)C)ccc3)c2cc1	IC50	=	36.8	uM	F	CELL-LINE	HepG2	392.866
O(C)c1ccccc1C(OCC(CC1=C([O-])C(=O)c2c(cccc2)C1=O)(C)C)=O	IC50	=	4.72	uM	F	CELL-LINE	HepG2	393.415
O(C)c1ccc(cc1)CN1c2c(cc(cc2)\C=C\C(OC(C)(C)C)=O)C(=O)C1=O	IC50	=	0.62	uM	F	CELL-LINE	HepG2	393.439
O(C)c1ccc(cc1)CN1c2c(cc(cc2)\C=C\C(OCCCC)=O)C(=O)C1=O	IC50	=	0.63	uM	F	CELL-LINE	HepG2	393.439
O(CCOC)c1cc2c(ncnc2Nc2cc(ccc2)C#C)cc1OCCOC	IC50	=	0.08	uM	F	CELL-LINE	HepG2	393.443
o1c(nnc1CCCc1c2c([nH]c1)cccc2)-c1c(OC)cc(OC)cc1OC	IC50	=	366	uM	F	CELL-LINE	HepG2	393.443
Fc1cc2c(nc1N1CC[NH2+]CC1)N(C=C(C2=O)c1[nH]c2c(n1)cccc2)CC	IC50	=	9.1	uM	F	CELL-LINE	HepG2	393.446
s1nc(cc1[N-]C(=O)C(=O)c1c2c(n(c1)Cc1onc(c1)CC)cccc2)C	IC50	=	1.149	uM	F	CELL-LINE	HepG2	393.447
s1c2c(cccc2C=2OC3=C(C([O-])=C(CC)C(=O)C3(CC)CC)C(=O)C=2)cc1	GI50	=	1.9	uM	F	CELL-LINE	HepG2	393.483
s1cc(c2c1cccc2)C=1OC2=C(C([O-])=C(CC)C(=O)C2(CC)CC)C(=O)C=1	GI50	=	0.13	uM	F	CELL-LINE	HepG2	393.483
s1c2c(cc1C=1OC3=C(C([O-])=C(CC)C(=O)C3(CC)CC)C(=O)C=1)cccc2	GI50	=	15.74	uM	F	CELL-LINE	HepG2	393.483
O=C(Nc1cc2nc([nH]c2cc1)-c1ccc(cc1)C)CC[NH+]1CC[NH+](CC1)CC	IC50	=	14.6	uM	F	CELL-LINE	HepG2	393.535
Clc1ccc(N2C(=O)c3ncn(c3N=C2NCCCC)-c2ccccc2)cc1	IC50	=	77.6	uM	F	CELL-LINE	HepG2	393.878
O1Cc2c(c(c3c(cc(OC)c(OC)c3)c2OC)-c2cc3OCOc3cc2)C1=O	IC50	=	163	uM	F	CELL-LINE	HepG2	394.379
Fc1cc2c(nc(cc2)C[NH2+]C2[C@H]3[C@@H]2CN(C3)c2ncc(cn2)C(=O)N[O-])cc1	GI50	=	0.23	uM	F	CELL-LINE	HepG2	394.41
O1c2c(C[C@@H]1C(C)=C)c1O[C@H]3[C@H](c4cc(OC)c(OC)cc4OC3)C(=O)c1cc2	ED50	=	15	uM	F	CELL-LINE	HepG2	394.423
S1c2c(N3C1=NC1=C(C3c3ccccc3)C(=O)c3c(cccc3)C1=O)cccc2	IC50	=	1.66	uM	F	CELL-LINE	HepG2	394.454
O(C)c1cc(cc(OC)c1)\C=C\1/CCC\C(=C/c2cc(OC)cc(OC)c2)\C/1=O	IC50	=	8.56	uM	F	CELL-LINE	HepG2	394.467
[NH2+]=C(Nc1ccc(cc1)-c1ccc(NC(=[NH2+])c2ccncc2)cc1)c1ccncc1	IC50	=	11.92	uM	F	CELL-LINE	HepG2	394.482
O(C)c1cc(OC)cc2c1-c1nn(c3cc(cc(c13)C2=O)C)CC[NH+](CC)CC	IC50	=	4.9	uM	F	CELL-LINE	HepG2	394.495
O=C/1Nc2ncccc2\C\1=C\c1[nH]c(C)c(C(=O)NCC[NH+]2CCCCC2)c1C	IC50	=	38.6	uM	F	CELL-LINE	HepG2	394.499
s1c2c(cccc2)c(C#CCO[C@@H]2O[C@@H](C)[C@H](O)[C@@H]([NH3+])C2)c1-c1ccccc1	IC50	=	17.2	uM	F	CELL-LINE	HepG2	394.515
s1c2c(cccc2)c(C#CCO[C@@H]2O[C@@H](C)[C@@H](O)[C@@H]([NH3+])C2)c1-c1ccccc1	IC50	=	6	uM	F	CELL-LINE	HepG2	394.515
s1c(cnc1N(Cc1ccc(cc1)C(=O)N[O-])CC(C)C)-c1ccc(cc1)C	GI50	=	7.42	uM	F	CELL-LINE	HepG2	394.519
s1c(cnc1N(Cc1ccc(cc1)C(=O)N[O-])CCCC)-c1ccc(cc1)C	GI50	=	4.3	uM	F	CELL-LINE	HepG2	394.519
S1c2cc(OCC)ccc2-n2c1nc(-c1ccccc1)c2C[NH+]1CCOCC1	IC50	=	3.52	uM	F	CELL-LINE	HepG2	394.519
[NH+]1(C2CCC1C[NH+](C2)Cc1c2c(ccc1)cccc2)Cc1c2c(ccc1)cccc2	IC50	=	18	uM	F	CELL-LINE	HepG2	394.562
O(CCCCCCCCCC)c1cc2n(c3c(c2cc1)ccnc3C)CCCC	IC50	=	125.893	uM	F	CELL-LINE	HepG2	394.603
Brc1ccc(cc1)-c1nc(ncc1)Nc1ccc(Cl)cc1Cl	IC50	=	0.72	uM	F	CELL-LINE	HepG2	395.087
Clc1cc(Cl)ccc1C=1n2ncnc2N=C2C=1C(=O)C(=O)c1c2cccc1	IC50	=	2.99	uM	F	CELL-LINE	HepG2	395.205
Clc1cc(Nc2ncnc3c2cc(NCc2ccc(Cl)cc2)cc3)ccc1	IC50	=	1.78	uM	F	CELL-LINE	HepG2	395.293
Clc1ccccc1CNc1cc2c(ncnc2Nc2cc(Cl)ccc2)cc1	IC50	=	5.33	uM	F	CELL-LINE	HepG2	395.293
Clc1cc(S(=O)(=O)CCCCCC)cc(Cl)c1C(=O)CC[NH+](C)C	EC50	=	54	uM	F	CELL-LINE	HepG2	395.371
Clc1cc(S(=O)(=O)CCCCCC)c(Cl)cc1C(=O)CC[NH+](C)C	EC50	=	63	uM	F	CELL-LINE	HepG2	395.371
Clc1c(Cl)c(S(=O)(=O)CCCCCC)ccc1C(=O)CC[NH+](C)C	EC50	=	66	uM	F	CELL-LINE	HepG2	395.371
O(C)c1cc(C(OCC(CC2=C([O-])C(=O)c3c(cccc3)C2=O)C)=O)c(O)cc1	IC50	=	4.96	uM	F	CELL-LINE	HepG2	395.387
Oc1ccc(O)cc1C(OCC(CC1=C([O-])C(=O)c2c(cccc2)C1=O)(C)C)=O	IC50	=	47.56	uM	F	CELL-LINE	HepG2	395.387
o1cnc(c1-c1c2ncn(c2c(OC)cc1)C)-c1cc(OC)c(OC)c(OC)c1	IC50	=	0.029	uM	F	CELL-LINE	HepG2	395.415
o1cnc(c1-c1c2n(cnc2c(OC)cc1)C)-c1cc(OC)c(OC)c(OC)c1	IC50	=	0.2	uM	F	CELL-LINE	HepG2	395.415
O1C2=C(C([O-])=C(CC)C(=O)C2(CC)CC)C(=O)C=C1c1cc2OCCOc2cc1	GI50	=	1.52	uM	F	CELL-LINE	HepG2	395.431
O(C)c1cc(OC)ccc1\C=C\C(=O)\C=C(/[O-])\C=C\c1ccc(OC)cc1OC	IC50	=	10.45	uM	F	CELL-LINE	HepG2	395.431
O(C)c1c(cccc1OC)\C=C\C(=O)\C=C(/[O-])\C=C\c1cccc(OC)c1OC	IC50	=	12.86	uM	F	CELL-LINE	HepG2	395.431
O(C)c1ccc(OC)cc1\C=C\C(=O)\C=C(/[O-])\C=C\c1cc(OC)ccc1OC	IC50	=	5.56	uM	F	CELL-LINE	HepG2	395.431
Fc1cc2nc(NC(=O)N3CCN(CC3)c3cc(ccc3)C)c(OC)nc2cc1	IC50	=	0.08	uM	F	CELL-LINE	HepG2	395.438
O(C)c1cc2c3c(c4c(cc(OC)cc4)c2cc1OC)[C@@H](O)[C@H]1[N+]([O-])(CCC1)C3	GI50	=	0.071	uM	F	CELL-LINE	HepG2	395.455
O=C(N1CCCC1)c1ccc(cc1)-c1nccc(c1)-c1c[nH]nc1-c1ncccc1	IC50	=	0.539	uM	F	CELL-LINE	HepG2	395.466
Fc1ccc(cc1)C[n+]1cc2n(c3c(c2cc1)cccc3)CCCc1ccccc1	IC50	=	10.4	uM	F	CELL-LINE	HepG2	395.501
S(CC)[C@H]1[C@@H](SCC)[C@@H](O[C@@H]1CO)n1nnc(c1)-c1ccc(OC)cc1	EC50	=	10.98	uM	F	CELL-LINE	HepG2	395.548
O(CCCCCC)c1ccc(cc1)C(=O)CC[NH+]1CCN(CC1)c1ccccc1	EC50	=	81	uM	F	CELL-LINE	HepG2	395.567
Clc1ccc(NC(=O)Nc2ccc(cc2)C#CC(=O)NC)cc1C(F)(F)F	IC50	=	23.3	uM	F	CELL-LINE	HepG2	395.768
Clc1ccc(cc1)\C=N\Nc1nc(NC2CC[NH+](CC2)C)c2c(n1)cccc2	IC50	=	0.17	uM	F	CELL-LINE	HepG2	395.918
Clc1ccccc1C1c2c(CN(c3c1cccc3)Cc1ccccc1)cccc2	IC50	=	4.5	uM	F	CELL-LINE	HepG2	395.933
Clc1cc(OCCCCCC)ccc1C(=O)CC[NH+]1CCN(CC1)C(=O)C	EC50	=	43	uM	F	CELL-LINE	HepG2	395.951
Ic1ccc(NC2=CC(=O)c3sc(nc3C2=O)C)cc1	IC50	=	0.00195	uM	F	CELL-LINE	HepG2	396.208
O1[C@@]2(O[C@@H]([C@H](O)[C@H](O)C2)[C@H]1COC(=O)\C=C\c1cc(O)c(O)cc1)C(OC)=O	IC50	=	86	uM	F	CELL-LINE	HepG2	396.348
Fc1ccc(N2C(=O)C3C(C[NH+](C)C34c3cc(OC)ccc3NC4=O)C2=O)cc1	IC50	=	27.69	uM	F	CELL-LINE	HepG2	396.398
O1C[C@H]2[C@]34Oc5c(C(=O)C3=C[C@H]([C@@H]2COC)C(=O)C14C\C=C(\C)/C)c(O)ccc5	IC50	=	5.7	uM	F	CELL-LINE	HepG2	396.439
O1C2([C@@]34Oc5c(C(=O)C3=C[C@H](C[C@H]4C1(C)C)C2=O)c(O)cc(O)c5)C\C=C(\C)/C	IC50	=	3.39	uM	F	CELL-LINE	HepG2	396.439
[NH2+]=C(Nc1ccc(cc1)-c1ccc(NC(=[NH2+])c2nccnc2)cc1)c1nccnc1	IC50	=	20.33	uM	F	CELL-LINE	HepG2	396.458
O1c2c(c(O)c(OC)c(OCC[NH+]3CCCCC3)c2)C(=O)C=C1c1ccccc1	IC50	=	17.1	uM	F	CELL-LINE	HepG2	396.463
O1c2c(c(O)c(OC)c(OCCC[NH+]3CCCC3)c2)C(=O)C=C1c1ccccc1	IC50	=	20.5	uM	F	CELL-LINE	HepG2	396.463
O(C)c1cc(ccc1O)\C=C\C(=O)CC(=O)\C=C\c1cc(C[NH+](C)C)c(O)cc1	IC50	=	5.2	uM	F	CELL-LINE	HepG2	396.463
O1c2c(c(O)c(OCCC[NH+]3CCCCC3)c(O)c2)C(=O)C=C1c1ccccc1	IC50	=	70.6	uM	F	CELL-LINE	HepG2	396.463
O1c2c(c(O)c(OCCC[NH+]3CCCC3)c(OC)c2)C(=O)C=C1c1ccccc1	IC50	=	4.3	uM	F	CELL-LINE	HepG2	396.463
O=C1N(CC[NH+](C)C)C(=O)c2c3c1cc1nnn(c1c3ccc2)CCC[NH+](C)C	IC50	=	0.18	uM	F	CELL-LINE	HepG2	396.495
O=C1N(CCC[NH+](C)C)C(=O)c2c3c1cc1nnn(c1c3ccc2)CC[NH+](C)C	IC50	=	0.78	uM	F	CELL-LINE	HepG2	396.495
O(C)c1cc2c3c(c4c(cc(OC)cc4)c2cc1OC)C(O)C[NH+](C3)CCCC	GI50	=	1.85	uM	F	CELL-LINE	HepG2	396.507
O(C)c1cc2c3CC[NH+](Cc3c3cc(OC)c(OC)cc3c2cc1OC)CCC	GI50	=	0.77	uM	F	CELL-LINE	HepG2	396.507
O(C)c1cc2c3CC[NH+](Cc3c3cc(OC)c(OC)cc3c2cc1OC)C(C)C	GI50	=	0.67	uM	F	CELL-LINE	HepG2	396.507
S(=O)(=O)(CCCCCC)c1cc(C)c(C(=O)CC[NH+]2CCOCC2)c(c1)C	EC50	=	32	uM	F	CELL-LINE	HepG2	396.572
Clc1cc2c(NC(=O)C23[NH+](CC2C3C(=O)N(C2=O)c2ccc(cc2)C)C)cc1	IC50	=	63.16	uM	F	CELL-LINE	HepG2	396.854
O(C)c1c(OC)cc(cc1OC)C=1N(C(=O)C=CC=1)c1cc(OC)c(OC)cc1	IC50	=	4.872	uM	F	CELL-LINE	HepG2	397.427
O(C)c1c(OC)cc(N2C(=CC=CC2=O)c2cc(OC)c(OC)cc2)cc1OC	IC50	=	0.513	uM	F	CELL-LINE	HepG2	397.427
Clc1ccc(NC(=O)Nc2ccc(cc2)\C=C\C(=O)NC)cc1C(F)(F)F	IC50	=	20.4	uM	F	CELL-LINE	HepG2	397.784
Clc1ccc(Nc2ncccc2-c2oc(nn2)Nc2ccc(Cl)cc2)cc1	GI50	=	20.54	uM	F	CELL-LINE	HepG2	398.253
FC(F)(F)c1ccc(NC(=O)C=2C(c3c(n[nH]c3)NC=2C)c2ccccc2)cc1	IC50	=	29.4	uM	F	CELL-LINE	HepG2	398.388
O1c2c(c(O)c(OC)c(OCC[NH+]3CCOCC3)c2)C(=O)C=C1c1ccccc1	IC50	=	67.6	uM	F	CELL-LINE	HepG2	398.435
O1c2c(c(O)c(OCCC[NH+]3CCOCC3)c(O)c2)C(=O)C=C1c1ccccc1	IC50	=	86.2	uM	F	CELL-LINE	HepG2	398.435
O=C1c2c(cccc2)C(=O)C=C1CC(COC(=O)c1cc2c(cc1)cccc2)(C)C	IC50	=	45.23	uM	F	CELL-LINE	HepG2	398.458
O1c2c(c(O)c(OC)c(OCCC[NH+](CC)CC)c2)C(=O)C=C1c1ccccc1	IC50	=	18	uM	F	CELL-LINE	HepG2	398.479
O(C)c1cc2c3c(C[NH+](CC3O)CC)c3cc(OC)c(OC)cc3c2cc1OC	GI50	=	0.36	uM	F	CELL-LINE	HepG2	398.479
O1c2c(c(O)c(OCCC[NH+](CC)CC)c(OC)c2)C(=O)C=C1c1ccccc1	IC50	=	3.7	uM	F	CELL-LINE	HepG2	398.479
O1CC[NH+](CC1)Cc1ccc(cc1)-c1nccc(c1)-c1c[nH]nc1-c1ncccc1	IC50	=	0.358	uM	F	CELL-LINE	HepG2	398.49
O1[C@]2([C@@H]3CC=C(C=O)[C@]4(O)[C@H](C[C@]3(CC2)C)C(=CC4=O)C)[C@H](C[C@@H]1\C=C(\C)/C)C	IC50	=	6.49	uM	F	CELL-LINE	HepG2	398.543
Clc1ccc(OCCCCCN2\C(=N/C#N)\N(CC2=O)c2cc[nH+]cc2)cc1	IC50	=	4.204	uM	F	CELL-LINE	HepG2	398.874
O=C1c2c(cccc2)C(=O)C([O-])=C1CC(COC(=O)c1cc2c(cc1)cccc2)C	IC50	=	3.7	uM	F	CELL-LINE	HepG2	399.422
O(C)C1=CC=C2c3c(cc(OC)c(OC)c3OC)CC[C@H](NC(=O)C)C2=CC1=O	EC50	=	0.031	uM	F	CELL-LINE	HepG2	399.443
Fc1cc\2c(NC(=O)/C/2=C\C=2NC(=O)C(=CC=2)C(=O)NCC[NH+](CC)CC)cc1	IC50	=	5	uM	F	CELL-LINE	HepG2	399.446
s1nc(cc1[N-]C(=O)C(=O)c1c2c(n(c1)Cc1ccc(cc1)C#N)cccc2)C	IC50	=	3.663	uM	F	CELL-LINE	HepG2	399.454
O(CCNC(=O)c1ccc(cc1)-c1nccc(c1)-c1c[nH]nc1-c1ncccc1)C	IC50	=	0.538	uM	F	CELL-LINE	HepG2	399.454
Fc1cc\2c(NC(=O)/C/2=C\c2[nH]c(C)c(C(=O)NCC[NH+](CC)CC)c2C)cc1	IC50	=	3.81	uM	F	CELL-LINE	HepG2	399.49
O=C(c1cc2N(CCCCC#N)C(=N)N(c2cc1)CCCCC#N)c1ccccc1	EC50	=	0.0941	uM	F	CELL-LINE	HepG2	399.498
S1CC(=O)N=C1N1N=C(CC1c1cc2c(cc1)cccc2)c1cc(C)c(cc1)C	IC50	=	8.49	uM	F	CELL-LINE	HepG2	399.518
S1CC(=O)N=C1N1N=C(CC1c1c2c(ccc1)cccc2)c1cc(C)c(cc1)C	IC50	=	5.94	uM	F	CELL-LINE	HepG2	399.518
[n+]1(cc2n(c3c(c2cc1)cccc3)CCCc1ccccc1)CCCCCCCC	IC50	=	4.7	uM	F	CELL-LINE	HepG2	399.602
S(=O)(N1C[C@@]2([C@@H](CC1)[C@H](C)[C@@H](O)CC2)C)CCCCCCCCCCCC	IC50	=	2.8	uM	F	CELL-LINE	HepG2	399.684
Clc1ccc(NC(=O)Nc2ccc(cc2)CCC(=O)NC)cc1C(F)(F)F	IC50	=	21	uM	F	CELL-LINE	HepG2	399.8
Clc1cc(c2OC(=CC(=O)c2c1)c1ccc([N+](=O)[O-])cc1)C[NH+]1CCCCC1	IC50	=	8.91	uM	F	CELL-LINE	HepG2	399.854
Clc1cc(Nc2ncnc3c2cc(NCc2c4c([nH]c2)cccc4)cc3)ccc1	IC50	=	5.26	uM	F	CELL-LINE	HepG2	399.885
Brc1ccccc1CN1c2c(cc(cc2)\C=C\C(OC)=O)C(=O)C1=O	IC50	=	0.26	uM	F	CELL-LINE	HepG2	400.228
Brc1cc(ccc1)CN1c2c(cc(cc2)\C=C\C(OC)=O)C(=O)C1=O	IC50	=	0.17	uM	F	CELL-LINE	HepG2	400.228
Brc1ccc(cc1)CN1c2c(cc(cc2)\C=C\C(OC)=O)C(=O)C1=O	IC50	=	0.04	uM	F	CELL-LINE	HepG2	400.228
O1C[C@H]2[C@@H]([C@@H](c3c(cc4OCOc4c3)[C@H]2O)c2cc(OC)c(O)c(OC)c2)C1=O	IC50	=	18.74	uM	F	CELL-LINE	HepG2	400.383
O1C[C@H]2[C@@H]([C@@H](c3c(cc4OCOc4c3)[C@H]2[NH3+])c2cc(OC)c(O)c(OC)c2)C1=O	IC50	=	1.5	uM	F	CELL-LINE	HepG2	400.407
s1cc(cc1[N+](=O)[O-])C(=O)N/C(/SC)=N/C(=O)c1cc(sc1)[N+](=O)[O-]	GI50	=	63.41	uM	F	CELL-LINE	HepG2	400.416
O1[C@]23[C@@H]([C@](C)(C(=O)C=C2)C1=O)[C@@H]([C@]12[C@H]3CC[C@](OCC)(C1)C(=C)C2=O)C(OC)=O	IC50	=	120.1	uM	F	CELL-LINE	HepG2	400.427
Oc1c2c(ccc1C(OCC(CC1=CC(=O)c3c(cccc3)C1=O)C)=O)cccc2	IC50	=	42.08	uM	F	CELL-LINE	HepG2	400.43
O(C)c1c2c(ccc1C(OCCCC1=CC(=O)c3c(cccc3)C1=O)=O)cccc2	IC50	=	54.17	uM	F	CELL-LINE	HepG2	400.43
o1cccc1C1n2c3c(nc2NC(C)=C1C(=O)Nc1ccc(OC)cc1)cccc3	IC50	=	4.97	uM	F	CELL-LINE	HepG2	400.438
S(\C(=N/C(=O)c1cc2c(nc1)cccc2)\NC(=O)c1cc2c(nc1)cccc2)C	GI50	=	57.57	uM	F	CELL-LINE	HepG2	400.462
o1c(ccc1\C=C\C(=O)N[O-])C[NH+](CCc1cc2OCOc2cc1)CCCCC	EC50	=	65.34	uM	F	CELL-LINE	HepG2	400.475
s1cccc1C1N2c3c(SC2=NC2=C1C(=O)c1c(cccc1)C2=O)cccc3	IC50	=	5.76	uM	F	CELL-LINE	HepG2	400.482
O1[C@@]23[C@H]4[C@H](CC[C@@]2([C@H]([C@@H](OC(=O)C)C3)C(=C1)C=C)C)[C@@]1([C@@H](C[C@@H](O)CC1)CC4)C	IC50	=	64.8	uM	F	CELL-LINE	HepG2	400.559
Clc1cc2c(NC(=O)C23[NH+](CC2C3C(=O)N(C2=O)c2ccc(F)cc2)C)cc1	IC50	=	41.09	uM	F	CELL-LINE	HepG2	400.817
ClCC(=O)[N-]C(O[C@@H]1CC[C@@]2(OC2)[C@@H]([C@]2(O[C@@H]2C\C=C(\C)/C)C)[C@@H]1OC)=O	IC50	=	0.86	uM	F	CELL-LINE	HepG2	400.879
[Se](\C(=N/C(=O)c1occc1)\NC(=O)c1occc1)Cc1ccccc1	GI50	=	7.65	uM	F	CELL-LINE	HepG2	401.283
Oc1c2c(ccc1C(OCCCC=1C(=O)C(=O)c3c(cccc3)C=1[O-])=O)cccc2	IC50	=	16.16	uM	F	CELL-LINE	HepG2	401.394
s1c(C(=O)NN2C(=Nc3c(cc(cc3)C)C2=O)C)c(N)c(C(OCC)=O)c1N	IC50	=	22	uM	F	CELL-LINE	HepG2	401.447
O1c2c(C=CC1(C)C)c(OC(=O)C)ccc2C(=O)\C=C\c1cc2c(n(cc2)C)cc1	IC50	=	0.52	uM	F	CELL-LINE	HepG2	401.462
O1C2=C(C([O-])=C(CC)C(=O)C2(CC)CC)C(=O)C=C1c1c2c(ccc1C)cccc2	GI50	=	16.67	uM	F	CELL-LINE	HepG2	401.482
O1C2=C(C([O-])=C(CC)C(=O)C2(CC)CC)C(=O)C=C1c1c2c(cccc2)c(cc1)C	GI50	=	1.24	uM	F	CELL-LINE	HepG2	401.482
S(Cc1ccccc1)c1nnc(n1-c1ccccc1)-c1cc2OCCOc2cc1	IC50	=	5.96	uM	F	CELL-LINE	HepG2	401.49
S1CC(=O)N=C1N1N=C(CC1c1cc2c(cc1)cccc2)c1ccc(OC)cc1	IC50	=	10.36	uM	F	CELL-LINE	HepG2	401.49
S1CC(=O)N=C1N1N=C(CC1c1c2c(ccc1)cccc2)c1ccc(OC)cc1	IC50	=	7.85	uM	F	CELL-LINE	HepG2	401.49
O(C)c1ccc(cc1)[C@H]1N(C(=O)[C@@H]1CCCc1ccccc1)c1ccc(OC)cc1	IC50	=	22	uM	F	CELL-LINE	HepG2	401.506
O1c2c(C=CC1(C)C)c(OC(C)C)ccc2C(=O)\C=C\c1cc2c(n(cc2)C)cc1	IC50	=	0.78	uM	F	CELL-LINE	HepG2	401.506
O1c2c(C=CC1(C)C)c(OCCC)ccc2C(=O)\C=C\c1cc2c(n(cc2)C)cc1	IC50	=	0.46	uM	F	CELL-LINE	HepG2	401.506
s1c2cc(NC(=O)C)ccc2nc1SCC(=O)NCc1ccc(OC)cc1	IC50	=	11.2	uM	F	CELL-LINE	HepG2	401.511
O=C(NCCCCCC[NH3+])c1ncc2n(c3c(c2c1)cccc3)Cc1ccccc1	IC50	=	58.8844	uM	F	CELL-LINE	HepG2	401.534
O(CCCC)c1cc2n(c3c(c2cc1)cc[n+](Cc1ccccc1)c3C)CC(C)C	IC50	=	1.8197	uM	F	CELL-LINE	HepG2	401.574
O(CC(C)C)c1cc2n(c3c(c2cc1)cc[n+](Cc1ccccc1)c3C)CC(C)C	IC50	=	5.7	uM	F	CELL-LINE	HepG2	401.574
O(CC(C)C)c1cc2n(c3c(c2cc1)cc[n+](Cc1ccccc1)c3C)CCCC	IC50	=	4.2	uM	F	CELL-LINE	HepG2	401.574
[NH3+]CCCCCCNc1nccc2c1n(c1c2cccc1)CCCc1ccccc1	IC50	=	12.1	uM	F	CELL-LINE	HepG2	401.578
Clc1cc(c2OC(=CC(=O)c2c1)c1ccc([N+](=O)[O-])cc1)C[NH+]1CC[NH2+]CC1	IC50	=	0.243	uM	F	CELL-LINE	HepG2	401.85
Clc1cc(Nc2ncnc3c2cc(NC(=O)\C=C\c2cccnc2)cc3)ccc1	IC50	=	9.12	uM	F	CELL-LINE	HepG2	401.857
Clc1cc(F)ccc1\C=N\Nc1nc(NCCC[NH+](C)C)c2c(n1)cccc2	IC50	=	0.67	uM	F	CELL-LINE	HepG2	401.897
Brc1ccc(cc1)CN1c2c(cc(cc2)\C=C\C(OC)=O)C(O)C1=O	IC50	=	0.67	uM	F	CELL-LINE	HepG2	402.244
Clc1c(Cl)c(OCCCCCC)ccc1C(=O)CC[NH+]1CC(=O)NCC1	EC50	=	47	uM	F	CELL-LINE	HepG2	402.342
Clc1cc(OCCCCCC)c(Cl)cc1C(=O)CC[NH+]1CC(=O)NCC1	EC50	=	54	uM	F	CELL-LINE	HepG2	402.342
Clc1cc(OCCCCCC)cc(Cl)c1C(=O)CC[NH+]1CC(=O)NCC1	EC50	=	23	uM	F	CELL-LINE	HepG2	402.342
O(C)c1c(OC)cc(cc1OC)C=1c2c(cc(OC)c(OC)c2OC)C(=O)C=1O	IC50	=	74.6	uM	F	CELL-LINE	HepG2	402.399
O1C[C@@H](Cc2cc(OC)c3OCOc3c2)[C@H](Cc2cc(OC)c(O)c(O)c2)C1=O	IC50	=	162.4	uM	F	CELL-LINE	HepG2	402.399
O1C2=C(C(=O)C(CC)=C(OC)C2(CC)CC)C(=O)C=C1c1c2c(ccc1)cccc2	GI50	=	20.65	uM	F	CELL-LINE	HepG2	402.49
O1C=C(C=CC1=O)[C@@H]1[C@]2(CC[C@H]3[C@@H](CC[C@@H]4C[C@@H](O)CC[C@]34C)[C@@]2(O)C[C@@H]1O)C	IC50	=	2.595	uM	F	CELL-LINE	HepG2	402.531
O1C=C(C=CC1=O)[C@H]1CC[C@]2(O)[C@H]3[C@H](CC[C@]12C)[C@]1(CC[C@H](O)C[C@@]1(O)CC3)C	IC50	=	2.4	uM	F	CELL-LINE	HepG2	402.531
[NH+](CCC[NH2+]Cc1ncc2n(c3c(c2c1)cccc3)Cc1ccccc1)(CC)CC	IC50	=	4.4	uM	F	CELL-LINE	HepG2	402.586
[NH+](CCC[NH2+]Cc1nccc2c1n(c1c2cccc1)Cc1ccccc1)(CC)CC	IC50	=	22	uM	F	CELL-LINE	HepG2	402.586
[NH+](CCC[NH2+]Cc1nccc2c1n(c1c2cccc1)CCCc1ccccc1)(C)C	IC50	=	4.6	uM	F	CELL-LINE	HepG2	402.586
O[C@@H]1CC2=C[C@H](O)[C@H]3[C@@H]4CC[C@H]([C@@H](CCCC(C)C)C)[C@]4(CC[C@@H]3[C@]2(CC1)C)C	IC50	=	14.6	uM	F	CELL-LINE	HepG2	402.663
Clc1cc(C(=O)N[C@@H](Cc2ccccc2)C(=O)[O-])c(O)c2c1C[C@H](OC2=O)C	IC50	=	0.3	uM	F	CELL-LINE	HepG2	402.81
Clc1cc(C(=O)N[C@@H](Cc2ccccc2)C(=O)[O-])c(O)c2c1C[C@@H](OC2=O)C	IC50	=	0.4	uM	F	CELL-LINE	HepG2	402.81
Clc1cc(C(=O)N[C@H](Cc2ccccc2)C(=O)[O-])c(O)c2c1C[C@H](OC2=O)C	IC50	=	3.2	uM	F	CELL-LINE	HepG2	402.81
Clc1cc(C(=O)N[C@H](Cc2ccccc2)C(=O)[O-])c(O)c2c1C[C@@H](OC2=O)C	IC50	=	5	uM	F	CELL-LINE	HepG2	402.81
Clc1cc(S(=O)(=O)CCCCCC)ccc1C(=O)CC[NH+]1CCOCC1	EC50	=	98	uM	F	CELL-LINE	HepG2	402.963
[Se](\C(=N/C(=O)c1oncc1)\NC(=O)c1oncc1)Cc1ccccc1	GI50	=	9.12	uM	F	CELL-LINE	HepG2	403.259
O1c2c(C(=O)C(OC)=C1c1cc(N)c(OC)cc1)c(O)c(OC)c(OC)c2OC	IC50	=	0.081	uM	F	CELL-LINE	HepG2	403.387
O(C)c1c(OC)cc(cc1OC)C1c2c(cc(OC)c(OC)c2OC)/C(=N/O)/C1	IC50	=	124	uM	F	CELL-LINE	HepG2	403.431
o1c2c(cccc2)c(C#CCO[C@@H]2O[C@@H](C)[C@@H](NC(=O)C)CC2)c1-c1ccccc1	IC50	=	18.2	uM	F	CELL-LINE	HepG2	403.478
O1c2c(C=CC1(C)C)c(OC)ccc2C(=O)\C=C\c1c2c(n(c1)COC)cccc2	IC50	=	4.7	uM	F	CELL-LINE	HepG2	403.478
O(C)c1ccc(cc1)Cn1nc(cc1C(=O)NN)-c1c2c(n(c1)CCC)cccc2	IC50	=	3.12	uM	F	CELL-LINE	HepG2	403.486
O(C)c1ccc(cc1)Cn1cc(c2c1cccc2)-c1nn(CCC)c(c1)C(=O)NN	IC50	=	3.14	uM	F	CELL-LINE	HepG2	403.486
S=C1C(CC)=C([O-])C2=C(OC(=CC2=O)c2c3c(ccc2)cccc3)C1(CC)CC	GI50	=	8.42	uM	F	CELL-LINE	HepG2	403.522
n1c2n(cc1-c1ccc(N(Cc3ccccc3)Cc3ccccc3)cc1)C=CC(=C2)C	GI50	=	18.4	uM	F	CELL-LINE	HepG2	403.529
Ic1cc(OCCCCCC)ccc1C(=O)CC[NH+](C)C	EC50	=	55	uM	F	CELL-LINE	HepG2	404.312
Ic1cc(ccc1OCCCCCC)C(=O)CC[NH+](C)C	EC50	=	31	uM	F	CELL-LINE	HepG2	404.312
O1c2c(C(=O)C(OC)=C1c1cc(O)c(OC)cc1)c(O)c(OC)c(OC)c2OC	IC50	=	0.174	uM	F	CELL-LINE	HepG2	404.371
O=C1[C@@]23[C@@H]([C@]45[C@@H](C(=O)[C@@]2(O)[C@@H]4O)C(CCC5)(C)C)[C@@H](OC(=O)C)C[C@@H]([C@@H]3O)C1=C	IC50	=	4.9	uM	F	CELL-LINE	HepG2	404.459
O1[C@@H]2[C@H]3[C@@H](c4c(occ4)C[C@@H]3[C@]3(C)[C@@](O)([C@H]2OC(=O)C)C(CC[C@@H]3O)(C)C)C1=O	IC50	=	8	uM	F	CELL-LINE	HepG2	404.459
o1c2c(cccc2)c(C#CCO[C@@H]2O[C@@H](C)[C@H](OC(=O)C)CC2)c1-c1ccccc1	IC50	=	19.2	uM	F	CELL-LINE	HepG2	404.462
o1c2c(cccc2)c(C#CCO[C@H]2O[C@@H](C)[C@H](OC(=O)C)CC2)c1-c1ccccc1	IC50	=	20.9	uM	F	CELL-LINE	HepG2	404.462
S(=O)(=O)(NCCc1ccccc1)c1ccc(-n2nnc(c2)-c2ccccc2)cc1	IC50	=	9.07	uM	F	CELL-LINE	HepG2	404.494
O1CC(=CC1=O)[C@H]1CC[C@]2(O)[C@H]3[C@H](CC[C@]12C)[C@@]1([C@H](C[C@@H](O)[C@H](O)C1)CC3)C=O	IC50	=	56.61	uM	F	CELL-LINE	HepG2	404.503
S=C1OC(=NN1C[NH+]1CCN(CC1)c1ccccc1)c1nc2c(cc1)cccc2	IC50	=	15.2	uM	F	CELL-LINE	HepG2	404.518
o1c2c(cccc2)c(C#CCO[C@@H]2O[C@@H](C)[C@@H]([NH2+]C(C)C)CC2)c1-c1ccccc1	IC50	=	13	uM	F	CELL-LINE	HepG2	404.53
O[C@H]1CC[C@]2([C@H](C1)[C@H](O)C[C@H]1[C@@H]3CC[C@H]([C@@H](CCCC(C)C)C)[C@]3(CC[C@@H]12)C)C	IC50	=	15.6	uM	F	CELL-LINE	HepG2	404.679
Clc1cc2NC(=O)[C@@]3(ON=C([C@H]3c3ccccc3)c3ccccc3OC)c2cc1	GI50	=	35.7	uM	F	CELL-LINE	HepG2	404.853
Clc1cc2NC(=O)[C@@]3(ON=C([C@H]3c3ccccc3)c3ccc(OC)cc3)c2cc1	GI50	=	38.14	uM	F	CELL-LINE	HepG2	404.853
Clc1c2NC(=O)[C@@]3(ON=C([C@H]3c3ccccc3)c3ccc(OC)cc3)c2ccc1	GI50	=	55.79	uM	F	CELL-LINE	HepG2	404.853
Brc1ccccc1CSc1oc(nn1)-c1cc2OCCOc2cc1	IC50	=	19.95	uM	F	CELL-LINE	HepG2	405.272
Brc1cc(ccc1)CSc1oc(nn1)-c1cc2OCCOc2cc1	IC50	=	24.95	uM	F	CELL-LINE	HepG2	405.272
Brc1ccc(cc1)CSc1oc(nn1)-c1cc2OCCOc2cc1	IC50	=	8.54	uM	F	CELL-LINE	HepG2	405.272
s1c2nc(ccc2c(N)c1C(=O)N)-c1cc(cc(c1)C(F)(F)F)C(F)(F)F	IC50	=	6.32	uM	F	CELL-LINE	HepG2	405.322
FC(F)(F)c1ccc(N2C(=CC=CC2=O)c2cc(OC)c(OC)c(OC)c2)cc1	IC50	=	10.164	uM	F	CELL-LINE	HepG2	405.372
Clc1cc(SCCCCCC)cc(Cl)c1C(=O)CC[NH+]1CCOCC1	EC50	=	13	uM	F	CELL-LINE	HepG2	405.41
Clc1cc(SCCCCCC)c(Cl)cc1C(=O)CC[NH+]1CCOCC1	EC50	=	19	uM	F	CELL-LINE	HepG2	405.41
Clc1c(Cl)c(SCCCCCC)ccc1C(=O)CC[NH+]1CCOCC1	EC50	=	20	uM	F	CELL-LINE	HepG2	405.41
O=C1N(CC[NH+](C)C)C(=O)c2c3c1cc(Nc1ccc([N+](=O)[O-])cc1)cc3ccc2	IC50	=	0.41	uM	F	CELL-LINE	HepG2	405.434
O=C1NC(=O)N(C=C1C#CCCCCC)C\C=C\CN1C(=O)c2c(cccc2)C1=O	IC50	=	9	uM	F	CELL-LINE	HepG2	405.454
S1C2(N(N=C1NC(=O)C)C(=O)C)CC(Oc1c2cc(OC(=O)C)cc1)(CC)C	IC50	=	620	uM	F	CELL-LINE	HepG2	405.475
O(C)c1nc2c(nc1NC(=O)N1CCN(CC1)c1cc(cc(c1)C)C)cc(cc2)C	IC50	=	0.081	uM	F	CELL-LINE	HepG2	405.502
O(C)c1nc2cc(ccc2nc1NC(=O)N1CCN(CC1)c1cc(cc(c1)C)C)C	IC50	=	0.19	uM	F	CELL-LINE	HepG2	405.502
O1c2c(C=CC1(C)C)c(OCC)ccc2C(=O)\C=C\c1ccc(N(CC)CC)cc1	IC50	=	3.01	uM	F	CELL-LINE	HepG2	405.538
[n+]1(cc2n(c3c(c2cc1)cccc3)CCCc1ccccc1)CCCc1ccccc1	IC50	=	4	uM	F	CELL-LINE	HepG2	405.565
S(CCCCCC)c1cc(C)c(C(=O)CC[NH+]2CCN(CC2)C(=O)C)c(c1)C	EC50	=	26	uM	F	CELL-LINE	HepG2	405.627
[NH+](Cc1c2cc(ccc2n(c1)CCCCCCCC)-c1cc(ccc1)C)(CC)CC	IC50	=	4.9	uM	F	CELL-LINE	HepG2	405.65
Clc1ccc(cc1)C1=NN(C(C1)c1c2c(ccc1)cccc2)C=1SCC(=O)N=1	IC50	=	16.45	uM	F	CELL-LINE	HepG2	405.909
Clc1ccc(cc1)C1=NN(C(C1)c1cc2c(cc1)cccc2)C=1SCC(=O)N=1	IC50	=	20.43	uM	F	CELL-LINE	HepG2	405.909
Clc1ccc(cc1)CNC(=O)CSc1sc2cc(NC(=O)C)ccc2n1	IC50	=	6.7	uM	F	CELL-LINE	HepG2	405.93
ClCC(=O)Nc1cc2sc(SCC(=O)NCc3ccccc3)nc2cc1	IC50	=	1.1	uM	F	CELL-LINE	HepG2	405.93
Ic1c2c(nc(nc2N)C)n(c1)[C@@H]1O[C@H](CO)[C@@H](O)[C@H]1O	IC50	=	6.31	uM	F	CELL-LINE	HepG2	406.18
O1c2c(C(=O)c3c1c(OC)c(OC)cc3)c(OC)cc(OC)c2-c1cc(ccc1)C	IC50	=	5	uM	F	CELL-LINE	HepG2	406.434
O1c2c(C(=O)c3c1c(OC)c(OC)cc3)c(OC)cc(OC)c2-c1ccc(cc1)C	IC50	=	24.6	uM	F	CELL-LINE	HepG2	406.434
O(C)c1c(OC)cc(cc1OC)-c1nc(cc2c1[nH]c1c2cccc1)C(OCC)=O	IC50	=	165.959	uM	F	CELL-LINE	HepG2	406.438
O1CCN(CC1)C(=O)\C=C\c1cc2c(N(Cc3ccc(OC)cc3)C(=O)C2=O)cc1	IC50	=	7.38	uM	F	CELL-LINE	HepG2	406.438
O1C[C@@]23[C@H]([C@H](O)[C@@]1(O)[C@]14[C@H]2[C@H](O)C[C@H](C1)C(=C)C4=O)[C@@](CCC3)(COC(=O)C)C	IC50	=	0.56	uM	F	CELL-LINE	HepG2	406.475
O1C[C@@]23[C@H]([C@H](O)[C@@]1(O)[C@]14[C@H]2CC[C@H]([C@H]1O)C(=C)C4=O)[C@@](CCC3)(COC(=O)C)C	IC50	=	1.2	uM	F	CELL-LINE	HepG2	406.475
O1C[C@@]23[C@H]([C@H](O)[C@@]1(O)[C@]14[C@H]2[C@@H](OC(=O)C)C[C@H]([C@H]1O)C(=C)C4=O)C(CCC3)(C)C	IC50	=	2.2	uM	F	CELL-LINE	HepG2	406.475
o1c(ccc1\C=C\C(=O)N[O-])C[NH+](Cc1ccccc1)CCCOc1ccccc1	EC50	=	14.95	uM	F	CELL-LINE	HepG2	406.482
o1c(ccc1\C=C\C(=O)N[O-])C[NH+](Cc1ccccc1)CCOc1ccc(cc1)C	EC50	=	12.96	uM	F	CELL-LINE	HepG2	406.482
Fc1ccc(-n2ncc3C[C@]4(C(CCC45O[C@H](\C=C\C)[C@H](O5)\C=C\C)=Cc23)C)cc1	EC50	=	0.164	uM	F	CELL-LINE	HepG2	406.501
s1c2c(cccc2)c(C#CCO[C@@H]2O[C@@H](C)[C@H](OC=O)CC2)c1-c1ccccc1	IC50	=	17.4	uM	F	CELL-LINE	HepG2	406.502
s1c2c(cccc2)c(C#CCO[C@@H]2O[C@@H](C)[C@@H](OC=O)CC2)c1-c1ccccc1	IC50	=	19.8	uM	F	CELL-LINE	HepG2	406.502
O(C)c1ccc(cc1)C[NH+](Cc1ccc(cc1)C(=O)Nc1ccccc1N)CCO	IC50	=	0.0009	uM	F	CELL-LINE	HepG2	406.506
O1CC(=CC1=O)[C@H]1CC[C@]2(O)[C@H]3[C@H](C[C@@H](O)[C@]12C)[C@@]1([C@H](C[C@@H](O)CC1)CC3)CO	IC50	=	5.17	uM	F	CELL-LINE	HepG2	406.519
O(Cc1ccccc1)c1cc2n(c3c(c2cc1)ccnc3C)CCCc1ccccc1	IC50	=	15.8489	uM	F	CELL-LINE	HepG2	406.529
Fc1ccc(cc1)Cn1c2c(c3cc(ncc13)C[NH2+]CC[NH+](CC)CC)cccc2	IC50	=	9.1	uM	F	CELL-LINE	HepG2	406.549
Fc1ccc(cc1)Cn1c2c(c3c1cccc3)ccnc2C[NH2+]CC[NH+](CC)CC	IC50	=	61.1	uM	F	CELL-LINE	HepG2	406.549
s1c2c(cccc2)c(C#CCO[C@@H]2O[C@@H](C)[C@@H]([NH+](C)C)CC2)c1-c1ccccc1	IC50	=	10	uM	F	CELL-LINE	HepG2	406.57
s1c2c(cccc2)c(C#CCO[C@@H]2O[C@@H](C)[C@@H]([NH2+]CC)CC2)c1-c1ccccc1	IC50	=	6.6	uM	F	CELL-LINE	HepG2	406.57
Clc1cc(Nc2ncnc3c2cc(NC(=O)\C=C\c2sccc2)cc3)ccc1	IC50	=	10.4	uM	F	CELL-LINE	HepG2	406.897
Clc1ccc(cc1)C[NH+]1C[C@@H]2[C@@H]3[NH+](CCC[C@@H]3[C@H]1CCCC(OC)=O)CCC2	IC50	=	4.05	uM	F	CELL-LINE	HepG2	406.998
ClCCN(CCCl)c1ccc(Nc2ncnc3c2cc(O)c(OC)c3)cc1	IC50	=	46.72	uM	F	CELL-LINE	HepG2	407.301
ClCCN(CCCl)c1cc(Nc2ncnc3c2cc(O)c(OC)c3)ccc1	IC50	=	23.26	uM	F	CELL-LINE	HepG2	407.301
Fc1c(Cn2c3c(c4c2cccc4)ccnc3NCC[NH3+])c(F)c(F)c(F)c1F	IC50	=	12.8	uM	F	CELL-LINE	HepG2	407.366
S(CC(=O)N\N=C\c1cc(ccc1)C(F)(F)F)c1oc(nn1)-c1ccncc1	IC50	=	6.52	uM	F	CELL-LINE	HepG2	407.376
Clc1cc(S(=O)(=O)CCCCCC)cc(Cl)c1C(=O)CC[NH+]1CC1C	EC50	=	57	uM	F	CELL-LINE	HepG2	407.382
Clc1c(Cl)c(S(=O)(=O)CCCCCC)ccc1C(=O)CC[NH+]1CC1C	EC50	=	82	uM	F	CELL-LINE	HepG2	407.382
Clc1cc(S(=O)(=O)CCCCCC)c(Cl)cc1C(=O)CC[NH+]1CC1C	EC50	=	152	uM	F	CELL-LINE	HepG2	407.382
Fc1ccc(cc1)-c1cc(ccc1N)C(=O)\C=C\c1cc(OC)c(OC)c(OC)c1	IC50	=	4.21	uM	F	CELL-LINE	HepG2	407.441
O1CC[NH+](CC1)CCCNc1nc(nc2c1cccc2)N\N=C\c1ccccc1O	IC50	=	3.83	uM	F	CELL-LINE	HepG2	407.498
O1CC[NH+](CC1)CCCNc1nc(nc2c1cccc2)N\N=C\c1cc(O)ccc1	IC50	=	6.49	uM	F	CELL-LINE	HepG2	407.498
s1c2c(cccc2)c(C=2OC3=C(C([O-])=C(CC)C(=O)C3(CC)CC)C(=O)C=2)c1C	GI50	=	2.03	uM	F	CELL-LINE	HepG2	407.51
O(Cc1ccccc1)c1cc2n(c3c(c2cc1)cc[n+](Cc1ccccc1)c3C)CC	IC50	=	49.9	uM	F	CELL-LINE	HepG2	407.537
O=C/1Nc2c(cccc2)\C\1=C\1/CCCc2c/1[nH]c(C)c2C(=O)NCC[NH+](CC)CC	IC50	=	7.73	uM	F	CELL-LINE	HepG2	407.538
Clc1cc(Cl)ccc1\C=N\NC(=O)CSc1oc(nn1)-c1ccncc1	IC50	=	18.58	uM	F	CELL-LINE	HepG2	408.269
O1Cc2c(c(c3c(cc(OC)c(OC)c3)c2OCC)-c2cc3OCOc3cc2)C1=O	IC50	=	141	uM	F	CELL-LINE	HepG2	408.406
O1CC2=C(C=C3N(Cc4c3nc3c(c4)c(COC)c(O)cc3)C2=O)[C@@](O)(CC)C1=O	IC50	=	92.071	uM	F	CELL-LINE	HepG2	408.41
O=C1N(N2C(=Nc3c(cc(cc3)C)C2=O)C)C(N)=C(C#N)C(=C1C#N)c1ccccc1	IC50	=	10	uM	F	CELL-LINE	HepG2	408.421
O(C)c1ccc(N2C(=O)C3C(C[NH+](C)C34c3cc(OC)ccc3NC4=O)C2=O)cc1	IC50	=	49.68	uM	F	CELL-LINE	HepG2	408.434
O(CCn1ccnc1)c1ccc(cc1)-c1nccc(c1)-c1c[nH]nc1-c1ncccc1	IC50	=	0.133	uM	F	CELL-LINE	HepG2	408.465
S1c2c(N3C1=NC1=C(C3c3ccc(cc3)C)C(=O)c3c(cccc3)C1=O)cccc2	IC50	=	1.7	uM	F	CELL-LINE	HepG2	408.481
S1CC(OC1CO)N1C=CC(=NC1=O)\N=C\N(c1ccccc1)c1ccccc1	EC50	=	0.05	uM	F	CELL-LINE	HepG2	408.482
O(C)c1nc(OC)nc(c1)CC(COCc1ccccc1)COCc1ccccc1	IC50	=	0.3	uM	F	CELL-LINE	HepG2	408.498
Oc1ccc(cc1C[NH+](C)C)\C=C\1/CC\C(=C/c2cc(C[NH+](C)C)c(O)cc2)\C/1=O	IC50	=	43.6	uM	F	CELL-LINE	HepG2	408.542
s1c(cnc1N(Cc1ccc(cc1)C(=O)N[O-])CCCCC)-c1ccc(cc1)C	GI50	=	7.02	uM	F	CELL-LINE	HepG2	408.546
O1[C@@H]2[C@H]3[C@@H]([C@H]1C[C@@](O)(C)[C@@H](O)CC[C@]2(OC(=O)CCC)C)C(=CC[C@@H]3C(C)C)C	IC50	=	4.7	uM	F	CELL-LINE	HepG2	408.579
[NH+](Cc1c2cc(ccc2n(c1)CCCCCCCC)-c1cnc(nc1)N)(CC)CC	IC50	=	1.65	uM	F	CELL-LINE	HepG2	408.614
Clc1c2nc(C)c(nc2ccc1)-c1ccc(cc1)-c1cc(S(=O)(=O)C)ccc1	EC50	=	0.38	uM	F	CELL-LINE	HepG2	408.909
Clc1ccc(cc1)C([NH+]1CC[NH+](CC1)Cc1ccccc1OC)c1ccccc1	IC50	=	65	uM	F	CELL-LINE	HepG2	408.973
Clc1cc(ccc1)Cn1c2c(c3c1cccc3)ccnc2C[NH2+]CCC[NH+](C)C	IC50	=	9.3	uM	F	CELL-LINE	HepG2	408.977
[truncated: 3,153 more rows]

## Sheet: A549(14053)
mol	STANDARD_TYPE	RELATION	STANDARD_VALUE	STANDARD_UNITS	ASSAY_TYPE	TARGET_TYPE	CELL_NAME	Weight
O=C(N(N=NC)C)C	IC50	=	55	uM	F	CELL-LINE	A549	115.136
S=C=NCCCC	IC50	=	413.8	uM	F	CELL-LINE	A549	115.2
O=C([O-])c1ncccc1	GI50	=	65.1628	uM	F	CELL-LINE	A549	122.103
P(CO)(CO)CO	IC50	=	72.91	uM	F	CELL-LINE	A549	124.076
ClC(Cl)C(=O)[O-]	IC50	=	1011	uM	F	CELL-LINE	A549	127.934
S=C=NCCCCC	IC50	=	266.8	uM	F	CELL-LINE	A549	129.227
FC1=CNC(=O)NC1=O	IC50	=	2.4	uM	F	CELL-LINE	A549	130.078
O=C(N(N=NC)C)NC	IC50	=	60	uM	F	CELL-LINE	A549	130.151
[NH2+]=C(N(C)C)NC(=[NH2+])N	IC50	=	4535.62	uM	F	CELL-LINE	A549	131.183
O(C)c1cc(ccc1)C#C	IC50	=	51.2	uM	F	CELL-LINE	A549	132.162
Oc1cc(ccc1O)C=O	IC50	=	3.1	uM	F	CELL-LINE	A549	138.122
O(CC)C(=O)N(N=NC)C	IC50	=	45	uM	F	CELL-LINE	A549	145.162
O=C1c2c(NC1=O)cccc2	IC50	=	13.5	uM	F	CELL-LINE	A549	147.133
O=C([O-])\C=C\c1ccccc1	IC50	=	87	uM	F	CELL-LINE	A549	147.153
S=C=NCc1ccccc1	IC50	=	20.5	uM	F	CELL-LINE	A549	149.217
O=C(Nc1ccccc1)NC	GI50	=	100	uM	F	CELL-LINE	A549	150.181
Sc1ncnc2nc[nH]c12	IC50	=	47	uM	F	CELL-LINE	A549	152.181
S(SCCO)(=O)(=O)C	IC50	=	161	uM	F	CELL-LINE	A549	156.226
S(SCC[NH3+])(=O)(=O)C	IC50	=	154	uM	F	CELL-LINE	A549	156.25
O(CC#Cc1nccn1C#C)C	IC50	=	1	uM	F	CELL-LINE	A549	160.176
O=C1Nc2c(N=C1N)cccc2	IC50	=	9.1	uM	F	CELL-LINE	A549	161.164
S=C=NCCc1ccccc1	IC50	=	16.8	uM	F	CELL-LINE	A549	163.244
ClCCN=NN(C(=O)C)C	IC50	=	26	uM	F	CELL-LINE	A549	163.608
n1c2c(n(C#C)c1C#C)cccc2	IC50	=	2	uM	F	CELL-LINE	A549	166.183
S=C1NC(=Nc2[nH]cnc12)N	IC50	=	2.82	uM	F	CELL-LINE	A549	167.196
Oc1cc(O)cc(O)c1C(=O)C	IC50	=	100	uM	F	CELL-LINE	A549	168.148
n1cn(cc1-c1ccccc1)C#C	IC50	=	1.1	uM	F	CELL-LINE	A549	168.199
n1ccn(c1)C#Cc1ccccc1	IC50	=	9.2	uM	F	CELL-LINE	A549	168.199
Oc1c(O)cc(cc1O)C(=O)[O-]	IC50	=	100	uM	F	CELL-LINE	A549	169.112
O1[C@H]2[C@@H](CC1=O)[C@@H](C)[C@@](O)(C2)C	IC50	=	5.88	uM	F	CELL-LINE	A549	170.208
O=C1c2c(cccc2)C(=O)C=C1[O-]	IC50	=	58	uM	F	CELL-LINE	A549	173.147
S(SC)c1[n+]([O-])cccc1	IC50	=	0.22	uM	F	CELL-LINE	A549	173.26
OCC#Cc1nccn1C#CCO	IC50	=	1.9	uM	F	CELL-LINE	A549	176.175
O(CC)C(=O)\C=C\c1ccccc1	IC50	=	50.35	uM	F	CELL-LINE	A549	176.215
S(=O)(CCCCN=C=S)C	IC50	=	21.99	uM	F	CELL-LINE	A549	177.292
[O-][n+]1c2c([n+]([O-])nc1N)cccc2	IC50	=	1.93	uM	F	CELL-LINE	A549	178.151
Oc1ccccc1\C=C\C(=O)N[O-]	GI50	=	55.2	uM	F	CELL-LINE	A549	178.167
O(C)c1cc(ccc1O)\C=C\C=O	GI50	=	1.7	uM	F	CELL-LINE	A549	178.187
ClCCN=NN(C(=O)NC)C	IC50	=	26	uM	F	CELL-LINE	A549	178.623
O1C[C@H](O)C(=O)c2c1cc(O)cc2	IC50	=	80.67	uM	F	CELL-LINE	A549	180.159
O(C)c1cc(ccc1O)\C=C\CO	IC50	=	85	uM	F	CELL-LINE	A549	180.203
O(C)c1cc(ccc1O)\C=C/CO	IC50	=	11.03	uM	F	CELL-LINE	A549	180.203
O=C(CC(C#N)C#N)c1ccccc1	IC50	=	9.7	uM	F	CELL-LINE	A549	184.198
[nH]1c2nccc(c2cc1)-c1cn[nH]c1	EC50	=	2.573	uM	F	CELL-LINE	A549	184.202
O=C1C[C@H](C(C)C)[C@@H](O)C=C1CO	IC50	=	159	uM	F	CELL-LINE	A549	184.235
S1S(Sc2c1cccc2)=O	IC50	=	0.1512	uM	F	CELL-LINE	A549	188.295
OC(CCCCCCCCC)C[NH3+]	IC50	=	6.78	uM	F	CELL-LINE	A549	188.335
Clc1cc(O)cc(COC)c1O	IC50	=	56.5	uM	F	CELL-LINE	A549	188.61
S(=O)(C(C)C)CCCN=C=S	IC50	=	16.7	uM	F	CELL-LINE	A549	191.319
S(=O)(CCCCN=C=S)CC	IC50	=	10.16	uM	F	CELL-LINE	A549	191.319
O(C)c1ccccc1\C=C\C(=O)N[O-]	GI50	=	53.5	uM	F	CELL-LINE	A549	192.194
n1ccn(C#Cc2ccccc2)c1C#C	IC50	=	5	uM	F	CELL-LINE	A549	192.221
n1c(cn(C#C)c1C#C)-c1ccccc1	IC50	=	2.5	uM	F	CELL-LINE	A549	192.221
n1ccn(C#C)c1C#Cc1ccccc1	IC50	=	6	uM	F	CELL-LINE	A549	192.221
OC1(C)C2(CC2)C(=C\C(=C/C)\C1=O)C	IC50	=	0.15	uM	F	CELL-LINE	A549	192.258
ClCCN=NN(C(OCC)=O)C	IC50	=	14	uM	F	CELL-LINE	A549	193.634
Oc1cc(ccc1O)\C=C\C(OC)=O	IC50	=	7.54	uM	F	CELL-LINE	A549	194.186
O=C1CCCC=C1COC(=O)\C=C\C	IC50	=	55	uM	F	CELL-LINE	A549	194.23
O(C)c1cc(ccc1OC)CCCO	IC50	=	23.1	uM	F	CELL-LINE	A549	196.246
[nH]1c2nccc(c2cc1)-c1cn(nc1)C	EC50	=	11.6	uM	F	CELL-LINE	A549	198.229
[n+]1(ccccc1\C=C\c1n(ccc1)C)C	GI50	=	22.9087	uM	F	CELL-LINE	A549	199.277
[n+]1(ccc(cc1)\C=C\c1n(ccc1)C)C	GI50	=	1.65959	uM	F	CELL-LINE	A549	199.277
O=C1C(=Cc2c(cccc2)C1=O)C(C)C	IC50	=	4.14	uM	F	CELL-LINE	A549	200.237
O1C(CC=CC1=O)\C=C\c1ccccc1	IC50	=	9.1	uM	F	CELL-LINE	A549	200.237
O=C1c2c(cnnc2)C(=O)c2[nH]nnc12	IC50	=	9.02	uM	F	CELL-LINE	A549	201.145
O=C(N[O-])\C=C\c1cc2c([nH]cc2)cc1	GI50	=	9.07	uM	F	CELL-LINE	A549	201.205
FC(F)(F)c1nc2[nH]nc(N)c2cc1	IC50	=	22.4	uM	F	CELL-LINE	A549	202.139
O=C1C=C(C)C(=O)C=C1C1CCCC=C1	IC50	=	30.9	uM	F	CELL-LINE	A549	202.253
o1c2c(nc1N1CCCCC1)cccc2	IC50	=	52.51	uM	F	CELL-LINE	A549	202.257
ClC(Cl)C(=O)Nc1ccccc1	IC50	=	130	uM	F	CELL-LINE	A549	204.056
o1c2c(nc1N1CCOCC1)cccc2	IC50	=	77.6	uM	F	CELL-LINE	A549	204.229
OC1(C)C2(CC2)C(=C\C(=C/C=C)\C1=O)C	IC50	=	0.002	uM	F	CELL-LINE	A549	204.269
Oc1c(ccc(C)c1O)C1CCCC=C1	IC50	=	35.6	uM	F	CELL-LINE	A549	204.269
Oc1c(cc(cc1O)C)C1CCCC=C1	IC50	=	34.4	uM	F	CELL-LINE	A549	204.269
Oc1cc(C2CCCC=C2)c(cc1O)C	IC50	=	9.5	uM	F	CELL-LINE	A549	204.269
OC(CCCCCCCCCO)C[NH3+]	IC50	=	16.19	uM	F	CELL-LINE	A549	204.334
[C@H]12[C@H]([C@H]3[C@H](CC[C@H]3C)C(CC1)=C)C2(C)C	IC50	=	98.4	uM	F	CELL-LINE	A549	204.357
[C@H]12[C@H](C3C(CCC1=C)C3(C)C)[C@@H](CC2)C	IC50	=	79	uM	F	CELL-LINE	A549	204.357
n1c(N)c-2ncnc-2c(nc1NCC)N	IC50	=	38	uM	F	CELL-LINE	A549	205.225
S(=O)(C(C)C)CCCCN=C=S	IC50	=	10.41	uM	F	CELL-LINE	A549	205.346
S(=O)(CCCCN=C=S)CCC	IC50	=	10.74	uM	F	CELL-LINE	A549	205.346
O1c2c(C(=O)C=C1C)c(O)cc(OC)c2	GI50	=	14	uM	F	CELL-LINE	A549	206.197
Oc1cc(C2CCCCC2)c(cc1O)C	IC50	=	27.7	uM	F	CELL-LINE	A549	206.285
[C@@H]12CCC(=C)[C@H](C)[C@]1(CCCC2(C)C)C	IC50	=	61.29	uM	F	CELL-LINE	A549	206.373
O1C(=O)C(C)=C(OC)C=C1\C=C\C(=O)C	IC50	=	43	uM	F	CELL-LINE	A549	208.213
Oc1cc(ccc1O)\C=C\C(OCC)=O	IC50	=	7.22	uM	F	CELL-LINE	A549	208.213
P(OCC)(OCC)(=O)N(N=NC)C	IC50	=	30	uM	F	CELL-LINE	A549	209.186
S=C=NCP(OCC)(OCC)=O	IC50	=	16.9	uM	F	CELL-LINE	A549	209.206
N(=C\c1ccc(cc1C)C)/c1ccccc1	IC50	=	88.4	uM	F	CELL-LINE	A549	209.292
Fc1ccc(cc1)-c1nc(n(c1)C#C)C#C	IC50	=	2.6	uM	F	CELL-LINE	A549	210.211
O=C1CC[C@H](O)C=C1COC(=O)\C=C\C	IC50	=	16.7	uM	F	CELL-LINE	A549	210.229
OC1C=C(COC(=O)\C=C\C)C(=O)CC1	IC50	=	24	uM	F	CELL-LINE	A549	210.229
O=C1c2c([nH]c3c2cccc3)C(=O)C=C1C	GI50	=	25.1189	uM	F	CELL-LINE	A549	211.22
n1nnn(c1)C/C(=C/c1ccccc1)/C#N	IC50	=	9.99	uM	F	CELL-LINE	A549	211.228
O(C)c1cc(cc2c1[nH]c1c2cccc1)C	GI50	=	1.14815	uM	F	CELL-LINE	A549	211.264
[As](SCC(O)CO)(C)C	GI50	=	3.63078	uM	F	CELL-LINE	A549	212.145
o1cc(c2c1-c1c(cccc1)C(=O)C2=O)C	IC50	=	7.4	uM	F	CELL-LINE	A549	212.204
O=C1NC(=O)c2c3c1ccc(N)c3ccc2	IC50	=	0.18	uM	F	CELL-LINE	A549	212.208
O(C)c1cc2cc([nH]c2cc1)-c1[nH]ccc1	IC50	=	55	uM	F	CELL-LINE	A549	212.252
Cl\C=C\1/C=C(C)C2(CC2)C(O)(C)C/1=O	IC50	=	0.2	uM	F	CELL-LINE	A549	212.676
O1[C@H](OC[C@H]1N1C=CC(=NC1=O)N)CO	IC50	=	0.68	uM	F	CELL-LINE	A549	213.193
ClCCN(N=O)C(=O)NCCCl	IC50	=	90	uM	F	CELL-LINE	A549	214.052
O=C1CCNC(=O)c2[nH]c3c(c12)cccc3	GI50	=	97.7	uM	F	CELL-LINE	A549	214.224
FC(F)(F)c1ccc(cc1)\C=C\C(=O)[O-]	IC50	=	56	uM	F	CELL-LINE	A549	215.15
O=C1c2c(cnnc2)C(=O)c2nn(nc12)C	IC50	=	0.002	uM	F	CELL-LINE	A549	215.172
O=C1c2c(cnnc2)C(=O)c2nnn(c12)C	IC50	=	0.004	uM	F	CELL-LINE	A549	215.172
Oc1cc(nc(c1)\C=N\O)-c1ncccc1	IC50	=	8.4	uM	F	CELL-LINE	A549	215.212
S1c2[nH]c3c(c2CN=C1NC)cccc3	IC50	=	43.4	uM	F	CELL-LINE	A549	217.296
ClC(Cl)C(=O)Nc1cc(ccc1)C	IC50	=	41.05	uM	F	CELL-LINE	A549	218.083
ClC(Cl)C(=O)Nc1ccc(cc1)C	IC50	=	48.92	uM	F	CELL-LINE	A549	218.083
Oc1ccc(N=Nc2c(n[nH]c2N)N)cc1	GI50	=	22.5	uM	F	CELL-LINE	A549	218.22
n1c2-c3c(Nc4c2c(ccc4)cc1)cccc3	IC50	=	2.14	uM	F	CELL-LINE	A549	218.259
o1c2c(nc1N1CCC[NH2+]CC1)cccc2	IC50	=	229.41	uM	F	CELL-LINE	A549	218.28
O=C/1C[C@@H]([C@H]2C(=C\C\1=C(/C)\C)[C@H](CC2)C)C	GI50	=	10	uM	F	CELL-LINE	A549	218.34
Oc1cc(ccc1O)\C=C\C(\[O-])=C\C(=O)C	IC50	=	0.183	uM	F	CELL-LINE	A549	219.216
O1[C@H](C=C)[C@H](NC1=O)c1ccc(OC)cc1	IC50	=	21.31	uM	F	CELL-LINE	A549	219.24
S(SCSC)c1[n+]([O-])cccc1	IC50	=	0.78	uM	F	CELL-LINE	A549	219.353
S(=O)(C(C)C)CCCCCN=C=S	IC50	=	7.75	uM	F	CELL-LINE	A549	219.373
S(=O)(CC(C)C)CCCCN=C=S	IC50	=	9.09	uM	F	CELL-LINE	A549	219.373
S(=O)(CCCCN=C=S)CCCC	IC50	=	9.56	uM	F	CELL-LINE	A549	219.373
OC1(C)C2(CC2)C(=C\C(=C/C(C)C)\C1=O)C	IC50	=	0.11	uM	F	CELL-LINE	A549	220.312
o1cccc1-c1nc(ccc1)-c1ccccc1	IC50	=	78.04	uM	F	CELL-LINE	A549	221.259
ClC(Cl)C(=O)Nc1ccccc1F	IC50	=	87.53	uM	F	CELL-LINE	A549	222.046
ClC(Cl)C(=O)Nc1ccc(F)cc1	IC50	=	68.41	uM	F	CELL-LINE	A549	222.046
O1c2c(c(O)c(OC)c(O)c2)C(=O)C=C1C	GI50	=	225	uM	F	CELL-LINE	A549	222.196
O(CNc1[n+]([O-])c2c([n+]([O-])n1)cccc2)C	IC50	=	2.77	uM	F	CELL-LINE	A549	222.204
O(C)c1cc(ccc1O)\C=C\C(OCC)=O	GI50	=	1.2	uM	F	CELL-LINE	A549	222.24
Oc1cc(ccc1O)\C=C\C(OCCC)=O	IC50	=	4.39	uM	F	CELL-LINE	A549	222.24
O=C1[C@@H]2[C@@H](C2)[C@@H](O)C=C1COC(=O)\C=C\C	IC50	=	18.1	uM	F	CELL-LINE	A549	222.24
O(C)c1ccc(cc1)C#Cc1nccn1C#C	IC50	=	0.5	uM	F	CELL-LINE	A549	222.247
o1cccc1-c1nc(ccc1)-c1ncccc1	IC50	=	53.85	uM	F	CELL-LINE	A549	222.247
O1[C@@H](CO)[C@H](NC1=O)c1ccc(OC)cc1	IC50	=	25.53	uM	F	CELL-LINE	A549	223.228
O1[C@H](CO)[C@H](NC1=O)c1ccc(OC)cc1	IC50	=	31.15	uM	F	CELL-LINE	A549	223.228
S=C=NC(P(OCC)(OCC)=O)C	IC50	=	16.6	uM	F	CELL-LINE	A549	223.233
O=C([O-])\C(=C/c1ccccc1)\c1ccccc1	IC50	=	85.4	uM	F	CELL-LINE	A549	223.251
S=C1N(CCN1C=O)C(=O)c1occc1	GI50	=	12.5	uM	F	CELL-LINE	A549	224.24
OCc1c2nc3c(cc2ccc1N)cccc3	IC50	=	0.005	uM	F	CELL-LINE	A549	224.263
N=1N(CCCC)C(=NN(CCCC)C=1C)C	IC50	=	68.5488	uM	F	CELL-LINE	A549	224.352
O[C@H]([C@@H]([NH3+])C)C\C=C\C=C\CCCCC=C	IC50	=	14.71	uM	F	CELL-LINE	A549	224.368
O1c2cc(ccc2OC1)\C=N\c1ccccc1	IC50	=	177.1	uM	F	CELL-LINE	A549	225.247
O=C/1NN=C(C)\C\1=C/c1c2c([nH]c1)cccc2	IC50	=	3.4	uM	F	CELL-LINE	A549	225.251
n1nnn(c1)C/C(=C/c1ccc(cc1)C)/C#N	IC50	=	7.95	uM	F	CELL-LINE	A549	225.255
OC\C=C(/Cc1ccccc1)\c1ncccc1	IC50	=	1130	uM	F	CELL-LINE	A549	225.291
O1[C@@]2(O[C@H]3[C@]([C@@H]2O)([C@@H](C=C[C@@H]3O)C)C1=O)C	IC50	=	83.6	uM	F	CELL-LINE	A549	226.228
O=C1C[C@@H](O)[C@H](O)C=C1COC(=O)\C=C\C	IC50	=	147	uM	F	CELL-LINE	A549	226.228
o1c2c(cc1C1(O)C=CC(=O)C=C1)cccc2	IC50	=	2.3	uM	F	CELL-LINE	A549	226.231
O=[N+]([O-])c1ccc(cc1)\C=N\c1ccccc1	IC50	=	1.6	uM	F	CELL-LINE	A549	226.235
Oc1ccc(cc1-c1ccc(O)cc1)CC=C	IC50	=	76.2	uM	F	CELL-LINE	A549	226.275
O(C)C=1[C@H](O)[C@@](CC)(C)C(=O)C=1[C@H](CC)C	GI50	=	41.3	uM	F	CELL-LINE	A549	226.316
S1SC(=S)C=C1c1ccc(O)cc1	IC50	=	66	uM	F	CELL-LINE	A549	226.344
o1c2c(nc1C1(O)C=CC(=O)C=C1)cccc2	IC50	=	2.33	uM	F	CELL-LINE	A549	227.219
o1c2c(c3NC(=O)C=C(c3cc2)C)c(C)c1C	IC50	=	99.29	uM	F	CELL-LINE	A549	227.263
s1cc(cc1)-c1nc(ccc1)-c1occc1	IC50	=	50.43	uM	F	CELL-LINE	A549	227.287
s1cccc1-c1nc(ccc1)-c1occc1	IC50	=	52.83	uM	F	CELL-LINE	A549	227.287
ClC(Cl)C(=O)Nc1cc(ccc1)C#C	IC50	=	11.22	uM	F	CELL-LINE	A549	228.078
o1c(ccc1\C=C\c1ccccc1)C(=O)N[O-]	IC50	=	32.54	uM	F	CELL-LINE	A549	228.227
O=C1c2c(cccc2)C(=O)c2[n+](nn(c12)C)C	GI50	=	0.32	uM	F	CELL-LINE	A549	228.231
O1[C@@H]2C=C[C@H](C)[C@@]([C@H](O)[C@H](O)C)([C@@H]2O)C1=O	IC50	=	52.3	uM	F	CELL-LINE	A549	228.244
O1[C@@]2(O[C@H]3[C@]([C@H]2O)([C@@H](CC[C@@H]3O)C)C1=O)C	IC50	=	61	uM	F	CELL-LINE	A549	228.244
Oc1cc(cc(O)c1)\C=C\c1ccc(O)cc1	IC50	=	4.47e-05	uM	F	CELL-LINE	A549	228.247
Oc1ccc(O)cc1\C=C\c1ccccc1O	IC50	=	19.01	uM	F	CELL-LINE	A549	228.247
Oc1ccc(O)cc1\C=C\c1ccc(O)cc1	IC50	=	12.66	uM	F	CELL-LINE	A549	228.247
Oc1ccc(O)cc1\C=C\c1cc(O)ccc1	IC50	=	10	uM	F	CELL-LINE	A549	228.247
O1[C@H](CCC)[C@@H](O)C\C=C\CC[C@@H](O)C1=O	IC50	=	8.1	uM	F	CELL-LINE	A549	228.288
ClC(Cl)C(=O)Nc1cc(ccc1)C#N	IC50	=	66.53	uM	F	CELL-LINE	A549	229.066
O=C1c2c(cnnc2)C(=O)c2nn(nc12)CC	IC50	=	0.018	uM	F	CELL-LINE	A549	229.199
[truncated: 13,887 more rows]

## Sheet: Hela(9165)
mol	STANDARD_TYPE	RELATION	STANDARD_VALUE	STANDARD_UNITS	ASSAY_TYPE	TARGET_TYPE	CELL_NAME	Weight
[truncated: 9,165 more rows]
