# Supplementary material for: Identifying a novel anticancer agent with microtubule-stabilizing effects through computational cell-based bioactivity prediction models and bioassays
Source: Royal Society of Chemistry journal article supplement (doi:10.1039/c8ob02193g), 2019-01-01
Supplement: c8ob02193g4.xlsx [file c8ob02193g4.xlsx]

## Sheet: 55 hits
mol	IDNUMBER	Code	BayesianTempModel-FCFP_8#EstPGood probability	BayesianTempModel-LCFP_6#EstPGood probability	EstPGood score (NB-FCFP_8)	EstPGood score (NB-LCFP_6)	Consensus EstPGood score (Cscore)	Cluster ID	Weight	RANK
O1CC[NH+](CC1)CCCNC(=O)c1cc(nc2c1cccc2)-c1cc(OCC)ccc1	Y200-5715	B12	0.796684	0.797609	58.7057	59.1904	58.9476	1	420.533	6
O(C)c1cc(Nc2nc3c(cccc3)c(c2)C(=O)NCCC[NH+]2CCCCCC2)ccc1OC	K788-6016	C01	0.716353	0.742693	40.9102	47.1984	43.942	1	463.602	18
o1c2cc(ccc2nc1C(C)C)C(=O)NCCC[NH+]1CCCCC1	G706-1900	C02	0.621292	0.620899	19.8514	20.6025	20.2235	1	330.452	40
O=C(NCC[NH+]1CCCCC1)c1cc(nc2c1cccc2)C	F283-0091	C03	0.781487	0.768614	55.3392	52.8587	54.0847	1	298.41	10
O(CC)c1ccc(cc1)-c1nc2c(cccc2)c(c1)C(=O)NCCC[NH+]1CCCCC1	K784-9946	C05	0.853729	0.800614	71.3428	59.8465	65.3423	1	418.561	3
O=C1Nc2c(cccc2)C(=O)N[C@@H]1CC(=O)NCCC[NH+](C)C	J100-0285	C06	0.639652	0.712524	23.9187	40.6105	31.1665	3	319.385	29
O=C1Nc2c(cccc2)C(=O)N[C@@H]1CCC(=O)NCCn1c2c(nc1C(C)C)cccc2	J101-0265	C07	0.638222	0.662015	23.6018	29.581	26.4228	3	433.512	34
Clc1cc2OCOc2cc1COc1cc2OC(=O)c3cc(OC)ccc3-c2cc1	Y040-1424	C08	0.716341	0.757465	40.9074	50.4241	45.4172	7	410.809	16
[nH]1c2c(nc1-c1ccc(N)cc1)cc(cc2)-c1nc2cc(N)ccc2n1C	6843-3168	C09	0.724883	0.641285	42.7997	25.0541	32.7461	9	354.417	25
o1nc(nc1-c1nnc(NCCC[NH+]2CCCCC2)c2c1cccc2)C1CC1	P894-0129	C10	0.594164	0.715533	13.8417	41.2675	23.9001	10	379.488	38
o1cc(nc1C[NH+]1CC[NH+](CC1)C(c1ccccc1)c1ccccc1)C(=O)NCC[NH+](C)C	V013-0150	C12	0.623586	0.621741	20.3596	20.7863	20.5719	15	450.607	39
S(C)c1ccc(cc1)-c1nc2n(C=CN=C2)c1Nc1cc(ccc1)C(=O)NCC[NH+](C)C	D401-0299	D01	0.634755	0.715965	22.8338	41.3618	30.7319	18	447.587	31
O(C)c1cc(ccc1OC)-c1nc2n(C=CN=C2)c1Nc1ccc(cc1)C(=O)NCC[NH+](C)C	D401-0395	D02	0.657636	0.623435	27.9026	21.1562	24.2964	18	461.546	36
s1cc(nc1-c1ccc(N(C)C)cc1)C1=Cc2cc(OC)ccc2OC1=O	K234-0056	D03	0.704275	0.764617	38.2346	51.9859	44.5831	19	378.452	17
S1c2n(C(C)=C1C(=O)N(C)C)c(NCCOC)c(n2)-c1cc(OC)ccc1	P861-0686	D05	0.53236	0.536253	0.150476	2.11855	0.564614	23	388.492	55
O1CC[NH+](CC1)CCCNC=1n2c(nc3c2cccc3)C(C#N)=C(C)C=1CCC	7706-0739	D06	0.734806	0.857972	44.998	72.3717	57.0665	24	392.527	7
O1c2c(cc(NC(=O)c3cc(OC)cc(OC)c3)cc2)C(=O)C=C1c1ccccc1	F264-0168	D07	0.589246	0.670824	12.7524	31.5046	20.0439	25	401.418	42
FC(F)(F)c1cc(NC(=O)c2cc3OCCCOc3cc2OC)ccc1	J031-0644	D08	0.631732	0.809101	22.1643	61.6998	36.9802	25	367.323	23
O1c2c(OC1)cc1nc(nc(c1c2)C)Nc1nc(cc(n1)C)C	Y020-0343	D09	0.638453	0.586844	23.653	13.166	17.647	26	309.329	45
FC(F)(F)c1cc(NC(=O)c2cc3OCCCOc3cc2)ccc1	J031-0483	D10	0.630873	0.687112	21.974	35.0613	27.7567	27	337.297	33
O=C(NCC[NH+]1CCCCC1)c1nc2n(c1)C=CC(=C2)C	P322-0447	D11	0.614249	0.562397	18.2912	7.82746	11.9655	29	287.387	50
O=C(NCC[NH+]1CCCCC1)c1cc(nc2c1cccc2C)C	F283-0907	E01	0.731492	0.679368	44.2639	33.3702	38.433	29	312.437	22
O=C1N(c2cc(ccc2-n2nccc12)C(=O)NCC[NH+]1CCCCC1)C	T226-1102	E03	0.659175	0.547557	28.2436	4.58685	11.382	29	354.434	51
O1[C@H](c2c(c(OC)c(OC)cc2)C1=O)[C@@H]1[NH+](CCc2c1c(OC)c1OCOc1c2)C	N051-0005	E04	0.737507	0.821064	45.5964	64.312	54.1516	30	414.434	9
O(C)c1ccc(N2[C@@H](c3c(n(c4c3cccc4)C)C2=O)c2cc(O)c(O)cc2)cc1	C866-0018	E05	0.567478	0.586721	7.93005	13.1391	10.2075	31	400.434	53
O=C(NCCC[NH+]1CCC(CC1)C)c1[nH]c2c(c1)ccc1c2nccc1	E950-0095	E07	0.790062	0.747003	57.2387	48.1396	52.4923	35	351.474	11
O1c2c(OC1)cc1NC(=O)C[C@H](c1c2)c1cc(OC)ccc1OC	C276-0105	E08	0.771651	0.793541	53.1602	58.3019	55.6717	36	327.336	8
S(=O)(=O)(C1=Cc2c(OC1=O)c(OC)ccc2)c1ccc(OC)cc1	C566-0012	E10	0.579785	0.591496	10.6564	14.1818	12.2933	39	346.359	49
O1[C@@H]2OC3(OOC24[C@@H](CC[C@@H]([C@H]4CC3)C)[C@@H](C)C1=O)C	0166-0004	E11	0.916661	0.900961	85.284	81.7591	83.503	40	282.336	1
O1CC[NH+](CC1)CCNC(=O)c1c2cccnc2n(c1)C	P168-0339	F01	0.706433	0.564402	38.7127	8.26539	17.8879	43	289.359	44
s1c-2c(cc1C(=O)NCCC[NH+]1CC[NH+](CC1)C)C(=O)N(c1c-2cccc1)C	C498-0578	F02	0.640522	0.725192	24.1113	43.3767	32.3399	45	400.547	28
O=C(NCCC[NH+]1CC[NH+](CC1)CC)c1cc(nc2c1cccc2C)C	F283-0999	F04	0.696855	0.692753	36.5907	36.293	36.4415	45	356.514	24
Clc1cc2N(c3c(Sc2cc1)cccc3)CCC[NH+](C)C	6264-0421	F05	0.825882	0.816874	65.174	63.3972	64.2795	47	319.88	4
O(C=1C=NN(C)C(=O)C=1Nc1cc(ccc1)C(=O)NCC[NH+](C)C)c1ccccc1OC	V023-5145	F07	0.618376	0.675846	19.2054	32.6012	25.0224	52	438.508	35
Fc1ccc(Nc2nc(ncc2C(=O)NCC[NH+]2CCCCC2)-c2cc3OCOc3cc2)cc1	V021-8261	F08	0.780296	0.659863	55.0753	29.111	40.0412	54	464.521	21
Fc1ccc(Nc2nc(ncc2C(=O)NCCC[NH+]2CCOCC2)-c2cc3OCOc3cc2)cc1	V020-3805	F09	0.682369	0.605677	33.3816	17.2784	24.0163	54	480.52	37
s1c2c(CC(OC2)(C)C)c2c1nc(nc2NCCC[NH+](C)C)-n1nc(cc1C)C	8640-0377	F11	0.653254	0.707167	26.9319	39.4408	32.5916	56	415.586	26
O1CCOc2c1cc(cc2)\C=C\c1cc(O)c(OC)cc1	8020-3745	G02	0.783907	0.716766	55.8753	41.5368	48.1755	59	284.311	14
O(C)c1cc(ccc1OC)\C=C\C=1n2c3c(nc2[NH+]=C(N=1)N)cccc3	8019-7476	G03	0.641429	0.588842	24.3123	13.6022	18.1852	59	348.386	43
o1c2nc3cc(OC)ccc3cc2cc1C(=O)NCCC[NH+]1CC[NH+](CC1)C	C369-0343	G04	0.715404	0.788978	40.6998	57.3055	48.2941	61	384.48	13
O1CC[NH+](CC1)CCCNC(=O)c1n(c2c(cc(OC)cc2)c1N1CCCC1=O)C	E756-0401	G05	0.620237	0.725751	19.6177	43.4987	29.2121	61	415.514	32
O(C)c1cc(OC)ccc1CNC(=O)c1nc(Nc2ccccc2)c2c(n1)cccc2	G582-2814	G06	0.699607	0.749404	37.2004	48.664	42.5479	62	414.465	20
O(C(=O)c1ccc(Nc2nc(nc3c2cccc3)C(OCC)=O)cc1)C(C)C	5847-0392	G07	0.736988	0.748249	45.4814	48.4117	46.9237	62	379.416	15
O=C1Nc2c(-n3nnc(c13)C(=O)NCCC[NH+]1CCc3c(C1)cccc3)cccc2	P516-0192	G08	0.626968	0.579271	21.1088	11.5123	15.5888	63	403.466	47
O1CC[NH+](CC1)CCNC(=O)c1cc(nc2c1cccc2)-c1ccc(cc1)C(C)C	Y200-5686	G09	0.738613	0.718272	45.8413	41.8656	43.8084	65	404.534	19
O=C(NCC[NH+]1CC[NH+](CC1)C)c1cc(nc2c1cccc2)-c1ccc(NC(=O)CC)cc1	L036-0179	G10	0.808465	0.796047	61.3155	58.8491	60.0697	65	447.583	5
s1c2c(cnc3c2cccc3OC)c(-c2ccc(cc2)C)c1C(=O)NCC[NH+]1CCOCC1	F477-3162	G11	0.666121	0.588579	29.7824	13.5447	20.0847	65	462.594	41
O1CC[NH+](CC1)CCCNC(=O)c1cc(nc2c1cc(cc2)C)-c1ccc(NC(=O)C)cc1	L036-2181	H01	0.578948	0.609815	10.4711	18.182	13.798	65	447.559	48
O=C(NCC[NH+]1CC[NH+](CC1)CC)c1cc(nc2c1cccc2)-c1ccc(NC(=O)C)cc1	L036-0385	H02	0.706577	0.63849	38.7445	24.4437	30.7743	65	447.583	30
O1CC[NH+](CC1)CCNC(=O)c1cc(nc2c1cccc2)-c1cc(OCCC)ccc1	6049-2282	H03	0.803757	0.721657	60.2727	42.6049	50.6746	65	420.533	12
O1CC[NH+](CC1)CCNC(=O)c1cc(nc2c1cc(cc2)C)C	F283-0684	H04	0.660212	0.696864	28.4734	37.1909	32.5415	65	314.409	27
O1CC[NH+](CC1)CCNC(=O)c1cc(nc2c1cccc2)-c1ccc(cc1)CC(C)C	Y200-4929	H05	0.841033	0.847642	68.5304	70.1159	69.3186	65	418.561	2
o1c2cc(ccc2nc1C(C)C)C(=O)NCC[NH+]1CCOCC1	G706-1853	H06	0.606133	0.603522	16.4932	16.808	16.6498	65	318.397	46
O(C)c1cc(ccc1OC)-c1c2n(nc1)C(N)=C(C=N2)C#N	7997-0024	H08	0.581316	0.568271	10.9956	9.11027	10.0086	67	295.302	54
s1c(nnc1C(=O)Nc1cc(ccc1)C(=O)NCC[NH+]1CCCCC1)C1CC1	F854-1243	H10	0.575414	0.576001	9.68806	10.7982	10.2281	70	400.527	52
